# Supplementary material for: Expression Analysis in Atlantic Salmon Liver Reveals miRNAs Associated with Smoltification and Seawater Adaptation
Source: Biology (Basel). 2022 Apr 30;11(5):688. doi: 10.3390/biology11050688 (PMC9138835; doi:10.3390/biology11050688)
Supplement: Supplementary file 1 [file biology-11-00688-s001.zip]

Archive with 10 entries (10 files):
- Figure S1. Heatmap of 88 DE-miRNAs.pdf
- Table S1. summary 42 liver samples.xlsx
- Table S2. DE-miRNAs with relative expression.xlsx
- Table S3. Complete overview of DE-miRNAs.xlsx
- Table S4. Overview of differentially expressed mRNAs.xlsx
- Table S5. Overview of enriched DE-mRNAs.xlsx
- Table S6. List of all predicted targets of guide DE-miRNAs.xlsx
- Table S7. List gene symbols target genes.xlsx
- Table S8. Enriched GO biological processes.xlsx
- Table S9. Enriched pathways.xlsx
