# Supplementary material for: Expression Analysis in Atlantic Salmon Liver Reveals miRNAs Associated with Smoltification and Seawater Adaptation
Source: Biology (Basel). 2022 Apr 30;11(5):688. doi: 10.3390/biology11050688 (PMC9138835; doi:10.3390/biology11050688)
Supplement: Supplementary file 1 [file biology-11-00688-s001.zip › Table S1. summary 42 liver samples.xlsx]

## Sheet: Ark1
Table S1. Overview of all liver samples from six time-points
Sample ID1	Sample information2	A260/280	A260/230	RIN	RNA concentration (ng/ul)	Total # reads3	Total # trimmed and size filtered reads4	uniquely mapped reads number5	uniquely mapped reads (%)6	NCBI SRA Acc#7
1	Before light treatment, liver, biological replicate 1	2.11	1.92	9.8	570.32	5963315	4132870	3288226	79.56	SRR13059614
2	Before light treatment, liver, biological replicate 2	2.13	1.87	9.9	688.98	7635442	4783820	3332557	69.66	SRR13059613
3	Before light treatment, liver, biological replicate 3	2.11	1.87	9.9	326.23	6263180	3741967	2437328	65.13	SRR13059602
4	Before light treatment, liver, biological replicate 4	2.13	1.88	10	599.72	6959717	4267447	2839679	66.54	SRR13059591
5	Before light treatment, liver, biological replicate 5	2.13	1.81	10	405.38	7045932	4324698	2836680	65.59	SRR13059580
6	Before light treatment, liver, biological replicate 6	2.12	1.92	10	424.48	8143575	4685782	2984670	63.7	SRR13059577
7	Before light treatment, liver, biological replicate 7	2.12	1.81	10	261.04	7234569	4521247	3077513	68.07	SRR13059576
8	Half way through light treatment, liver, biological replicate 1	2.09	1.57	10	316.81	7063106	4303404	2688000	62.46	SRR13059575
9	Half way through light treatment, liver, biological replicate 2	2.08	1.47	10	238.81	6307713	3864181	2477692	64.12	SRR13059574
10	Half way through light treatment, liver, biological replicate 3	2.09	1.4	9.7	135.94	5712632	3299770	1937346	58.71	SRR13059573
11	Half way through light treatment, liver, biological replicate 4	2.12	1.85	9.8	527.28	6808242	4250404	2945183	69.29	SRR13059612
12	Half way through light treatment, liver, biological replicate 5	2.05	1.6	9.9	226.71	7121866	4061268	2374886	58.48	SRR13059611
13	Half way through light treatment, liver, biological replicate 6	2.04	1.6	10	174.02	8142718	4220102	2104160	49.86	SRR13059610
14	Half way through light treatment, liver, biological replicate 7	2.11	1.56	10	241.32	7200463	4407254	2837702	64.39	SRR13059609
15	Three quaters into light treatment, liver, biological replicate 1	2.06	1.6	10	257.98	7246816	4421562	2741794	62.01	SRR13059608
16	Three quaters into light treatment, liver, biological replicate 2	2.09	1.65	10	192.03	6801680	4048399	2493166	61.58	SRR13059607
17	Three quaters into light treatment, liver, biological replicate 3	2.06	1.36	10	387.12	6164598	3908343	2601301	66.56	SRR13059606
18	Three quaters into light treatment, liver, biological replicate 4	2.08	1.51	9.9	587.18	6594051	3678733	2100471	57.1	SRR13059605
19	Three quaters into light treatment, liver, biological replicate 5	2.1	1.53	9.9	405.72	8789362	4963065	2746584	55.34	SRR13059604
20	Three quaters into light treatment, liver, biological replicate 6	2.09	1.66	10	467.18	8498460	5248569	3380502	64.41	SRR13059603
21	Three quaters into light treatment, liver, biological replicate 7	2.12	1.97	10	575.39	7959440	4761488	2938492	61.71	SRR13059601
22	One day prior seawater transfer, liver, biological replicate 1	2.12	1.7	10	545.98	7357400	4040482	2417134	59.82	SRR13059600
23	One day prior seawater transfer, liver, biological replicate 2	2.12	1.73	9.9	547.31	9177305	5041047	2865218	56.84	SRR13059599
24	One day prior seawater transfer, liver, biological replicate 3	2.08	1.77	9.8	158.94	8781672	5349669	3453056	64.55	SRR13059598
25	One day prior seawater transfer, liver, biological replicate 4	2.08	1.69	10	502.1	10238393	5895525	3498628	59.34	SRR13059597
26	One day prior seawater transfer, liver, biological replicate 5	2.12	1.42	10	463.94	7128873	4077023	2384721	58.49	SRR13059596
27	One day prior seawater transfer, liver, biological replicate 6	2.1	1.73	10	206.18	6745753	4214376	2872756	68.17	SRR13059595
28	One day prior seawater transfer, liver, biological replicate 7	2.09	1.7	9.8	223.16	8816781	6661217	5247014	78.77	SRR13059594
29	One week after seawater transfer, liver, biological replicate 1	2.1	2.13	9.8	1400.74	9660866	6042031	4165830	68.95	SRR13059593
30	One week after seawater transfer, liver, biological replicate 2	2.11	1.62	9.8	628.57	12018158	7392681	5082082	68.74	SRR13059592
31	One week after seawater transfer, liver, biological replicate 3	2.08	1.61	10	285.78	8613240	5220974	3310857	63.41	SRR13059590
32	One week after seawater transfer, liver, biological replicate 4	2.1	1.5	9.8	219.41	6555905	4516869	3396995	75.21	SRR13059589
33	One week after seawater transfer, liver, biological replicate 5	2.1	1.67	10	600.83	8547105	5246673	3419540	65.18	SRR13059588
34	One week after seawater transfer, liver, biological replicate 6	2.08	1.59	9.9	291.32	10082115	7447891	5760782	77.35	SRR13059587
35	One week after seawater transfer, liver, biological replicate 7	2.11	1.59	9.9	243.32	9008192	5742460	4066363	70.81	SRR13059586
36	One month after seawater transfer, liver, biological replicate 1	2.15	1.8	10	548.6	6324365	3625104	2380526	65.67	SRR13059585
37	One month after seawater transfer, liver, biological replicate 2	2.13	1.93	10	764.86	7775813	5205570	3909408	75.1	SRR13059584
38	One month after seawater transfer, liver, biological replicate 3	2.13	1.85	10	463.39	8852698	5987833	4626335	77.26	SRR13059583
39	One month after seawater transfer, liver, biological replicate 4	2.1	1.8	9.9	447.93	11708409	8343801	6444478	77.24	SRR13059582
40	One month after seawater transfer, liver, biological replicate 5	2.12	1.78	10	568.16	12308145	8158361	5892310	72.22	SRR13059581
41	One month after seawater transfer, liver, biological replicate 6	2.1	1.64	10	877.26	12307183	7238563	5010941	69.23	SRR13059579
42	One month after seawater transfer, liver, biological replicate 7	2.12	1.97	9.9	328.7	7909933	4243729	2928236	69	SRR13059578
