# Supplementary material for: Expression Analysis in Atlantic Salmon Liver Reveals miRNAs Associated with Smoltification and Seawater Adaptation
Source: Biology (Basel). 2022 Apr 30;11(5):688. doi: 10.3390/biology11050688 (PMC9138835; doi:10.3390/biology11050688)
Supplement: Supplementary file 1 [file biology-11-00688-s001.zip › Table S2. DE-miRNAs with relative expression.xlsx]

## Sheet: Ark1
Table S2. Differentially expressed miRNAs sorted by family
No.1	Mature miRNAs2	T1 vs T2 3	T1 vs T3 4	T1 vs T4 5	T1 vs T5 6	T1 vs T6 7	Family8	Mature miRNA sequences (5'-3')
1	ssa-let-7e-5p	0.158281	0.504677	0.705794	0.832418	1.11935	let-7	TGAGGTAGTAGATTGAATAGTT
2	ssa-miR-100a-2-3p	-0.674851	0.601715	0.923443	1.46203	2.01166	100	ACAAGCTTGTGTCTATAGGTATG
3	ssa-miR-101a-3p	1.15502	1.60368	1.45757	1.61844	0.674148	101	TACAGTACTGTGATAACTGAAG
4	ssa-miR-101a-5p	1.0575	1.02697	0.831713	0.624741	0.0203672	101	TCAGTTATCACTGTGCTGATGCT
5	ssa-miR-101b-3p	-0.264195	0.990034	1.39816	1.86488	1.12084	101	TACAGTACTATGATAACTGAA
6	ssa-miR-101b-5p	0.274325	0.858305	1.27201	1.03485	0.458301	101	CAGTTATCATGGTACCGGTGCTGT
7	ssa-miR-106a-5p	0.747179	1.01488	0.758618	0.822073	0.610669	106	TAAAGTGCTTACAGTGCAGGTA
8	ssa-miR-106b-5p	0.739937	1.00945	0.755524	0.814875	0.60966	106	AAAAGTGCTTACAGTGCAGGTA
9	ssa-miR-125a-1-3p	-0.722494	1.12722	0.89511	0.82597	1.17188	125	ACGGGTTGGGTTCTCGGGAGCT
10	ssa-miR-125b-1-3p	1.29627	1.42719	1.32734	0.846166	-0.270343	125	ACAGGTGAGGTCCTCGGGAA
11	ssa-miR-130a-2-3p	0.90589	1.17707	0.840931	0.698949	0.0853653	130	CAGTGCAATAATGAAAGGGCATC
12	ssa-miR-1-3p	1.79103	0.472379	1.32734	1.39898	0.458745	1	TGGAATGTAAAGAAGTATGTAT
13	ssa-miR-142b-5p	0.885723	1.41648	0.991598	1.03606	0.598366	142	TCCATAAAGTAGAGAGTACTAC
14	ssa-miR-146a-5p	0.537529	0.200822	0.214614	0.590832	2.14371	146	TGAGAACTGAATTCCATAGATGG
15	ssa-miR-146b-5p	0.0954132	0.184146	0.313954	-0.258018	1.06031	146	TGAGAACTGAAGTCCATAGATGG
16	ssa-miR-146d-5p	0.75506	1.42439	1.28995	0.890735	0.802458	146	TGAGAACTGAATTCCAAGGGTT
17	ssa-miR-153a-3p	1.05887	1.16702	1.48933	1.55495	0.840714	153	TTGCATAGTCACAAAAATGATC
18	ssa-miR-15d-5p	0.97885	1.28513	0.521292	0.0589938	-0.336834	15	TAGCAGCACAGAATGGTTTGT
19	ssa-miR-15e-5p	0.981542	1.28813	0.527301	0.0683889	-0.324779	15	AAGCAGCACAGAATGGTTTGT
20	ssa-miR-17-5p	0.692118	1.01004	0.974022	0.785204	0.872097	17	CAAAGTGCTTACAGTGCAGGTAG
21	ssa-miR-18bc-5p	0.808923	1.54525	1.07961	0.941147	0.478426	18	TAAGGTGCATCTAGTGCAGATA
22	ssa-miR-19a-2-3p	-0.0542657	0.226217	0.582813	0.956869	0.884958	19	TGTGCAAATCTATGCAAAACTG
23	ssa-miR-200b-3p	0.41497	0.477655	0.6962	1.07242	0.590973	200	TAACACTGTCTGGTAACGATGTT
24	ssa-miR-200c-3p	0.550473	0.6281	1.07002	1.66267	0.89677	200	TAACACTGTCTGGTAATGATGTC
25	ssa-miR-200d-3p	0.907011	-0.613273	1.54682	2.35544	1.33122	200	TAACACTGTCTGGTAATGATGT
26	ssa-miR-20a-5p	0.550734	1.31869	1.35936	1.15897	1.23535	20	TAAAGTGCTTATAGTGCAGGTAG
27	ssa-miR-216c-3p	0.967915	0.957778	0.722712	0.000206953	-0.504116	216	CACAGTGGCTGCTGGGGTTCTG
28	ssa-miR-218a-5p	0.705306	0.496	0.790227	1.5882	2.17549	218	TTGTGCTTGATCTAACCATGTG
29	ssa-miR-218b-5p	0.510342	0.387365	0.76123	1.67474	2.09589	218	TTGTGCTTGATCTAACCATGCA
30	ssa-miR-221-3p	0.0951823	-0.0429384	0.244689	0.894638	1.15051	221	AGCTACATTGTCTGCTGGGTTTC
31	ssa-miR-222a-5p	0.103476	0.342458	0.57559	1.05932	1.38529	222	TGCTCAGTAGGCAGTGTAGATCCT
32	ssa-miR-222b-3p	0.176629	0.122176	0.307189	0.618071	0.966253	222	AGCTACATCTGGCTACTGGGTC
33	ssa-miR-29b-1-5p	-0.0337592	-0.186507	0.37478	1.49592	1.53072	29	ACTGATTTCTTCTGGTGTTTAGA
34	ssa-miR-462b-5p	1.16846	0.364175	0.602774	0.550126	0.770942	462	TAACGGAACCCATAAAGCAGCTG
35	ssa-miR-551a-3p	1.17397	0.605893	0.457249	0.602585	-0.242398	551	GCGACCCATCCTTGGTTTCTG
36	ssa-miR-551b-3p	1.07737	0.993137	0.831648	0.485028	-0.104836	551	GCGACCCACTCATGATTTCAGA
37	ssa-miR-730a-1-3p	1.00644	0.534369	0.0959611	0.466442	0.204276	730	CACAGCGCCTGCAATGTGGAGG
38	ssa-miR-93a-5p	0.141032	0.544825	0.737242	0.705261	1.01082	93	AAAAGTGCTGTTTGTGCAGGTAG
39	ssa-miR-93b-5p	0.580707	0.664906	0.863381	1.29516	0.927897	93	CAAAGTGCTGTTTGTGCAAGTAG
40	ssa-miR-novel-16-5p	0.0206369	-0.0762106	0.445112	1.12222	0.83534	novl-16	TTGCTGTTGACACTGTCTGTG
41	ssa-let-7a-1-3-3p	-1.34914	-0.365158	-0.352667	-0.995545	-0.291176	let-7	CTGTACAGCCTCCTAGCTTTCC
42	ssa-let-7a-2-3p	-0.994489	-0.736179	-0.943052	-1.53975	-0.708435	let-7	CTATACAACTTACTGTCTTTCC
43	ssa-let-7b-3p	-1.09156	-0.554646	-0.441916	-1.87795	-0.963806	let-7	CTGTACAACCTACTGCCTTCCC
44	ssa-let-7d-c-1-3p	-1.29168	-0.519908	-0.418702	-1.21366	-0.37285	let-7	CTGTACAACCTTCTAGCTTTCC
45	ssa-let-7h-3p	-0.259212	-0.296822	-0.439204	-1.25154	-1.07374	let-7	CTATACAACTTACTGCCTTCCT
46	ssa-let-7j-3p	-1.20084	-0.776802	-0.585348	-1.08695	-0.645567	let-7	CTGTACAACCTACTGTCTTTCT
47	ssa-miR-122-1-3p	-1.05819	-1.35855	-1.7949	-2.18951	-1.91002	122	AACGCCATTATTACACTATATA
48	ssa-miR-122-2-3p	-2.10855	-2.70735	-3.43342	-4.26282	-4.40743	122	AACGCCATTATCACACTAAATA
49	ssa-miR-125a-2-3-3p	-0.968701	-0.113041	-0.361494	-1.47625	-0.471403	125	ACGGGTTAGGCTCTTGGGACGC
50	ssa-miR-146a-1-2-3p	-0.18268	-0.368171	-0.67289	-0.324988	1.98236	146	ATCTATGGGCTCAGTTCTTCTGG
51	ssa-miR-148b-5p	-0.603964	-0.920647	-1.03439	-0.222226	0.424025	148	AAGTTCGGTGATACACTTCGACT
52	ssa-miR-15a-3p	-0.141082	-0.315436	-0.52048	-1.2385	-0.742055	15	CAGACCATGAAGAGCTGCTGCT
53	ssa-miR-15bf-5p	-0.551994	-1.14611	-1.61264	-2.11811	-2.45428	15	TAGCAGCACATCATGTTTTGCA
54	ssa-miR-15d-3p	-1.2081	-1.08488	-0.791069	-1.28937	-0.723129	15	CAGGCCGTACTGTGCTGCCGCAGT
55	ssa-miR-15e-3p	-0.319882	-0.788587	-0.326426	-1.03474	-0.733338	15	CAGGCTGTACTGTGCTGTTGCAGT
56	ssa-miR-16a-1-3p	-0.511663	-0.728162	-1.00874	-1.12605	-0.580462	16	CCAGTATTGTTCGTGCTGCTGA
57	ssa-miR-181a-2-3p	-0.783173	-0.725984	-0.767764	-1.49328	-0.876722	181	ACCATCGACCGTTGACTGTACC
58	ssa-miR-181a-4-3p	-0.650177	-0.396883	-0.295506	-1.1197	-0.668141	181	ACCATCGACCGTTGAGTGTACC
59	ssa-miR-181e-3p	-0.976711	-0.274446	-0.205971	-0.0979587	-0.0638468	181	CTCACTGATCAATGAATGGACA
60	ssa-miR-203b-3p	-0.412102	-0.486131	-0.373892	-0.912406	-1.56008	203	TGAAATGTTTAGGACCACTCG
61	ssa-miR-205b-5p	-2.62888	-1.31386	-1.15444	-1.31446	-3.22271	205	TCCTTCATTCCACCGGAGTCTG
62	ssa-miR-206-3p	1.04568	-1.92511	-1.75226	-0.674902	-1.27694	206	TGGAATGTAAGGAAGTGTGTGG
63	ssa-miR-210-1-5p	-0.364384	-1.21603	-1.44422	-1.50678	-1.09888	210	AGCCACTGACTAACGTACATTG
64	ssa-miR-214-1-2-3p	-0.210888	-0.0427114	-0.600907	-1.34734	-1.9803	214	ACAGCAGGCACAGACAGGCAGA
65	ssa-miR-214-3-3p	-0.207025	-0.0359883	-0.591677	-1.34266	-1.96893	214	TACAGCAGGCACAGACAGGCAGA
66	ssa-miR-216a-3p	1.07298	0.45952	-0.12761	-0.400144	-0.910187	216	ACATTGACCTGGAGAGGTTCTG
67	ssa-miR-21a-1-3p	-0.974119	-0.423052	-1.13226	-0.482269	-0.255261	21	CGACAACGGTCTGTAAGCTGT
68	ssa-miR-21a-2-3p	-1.32744	-0.299487	-0.32319	0.128073	0.612292	21	CGACAACAGTCTGTAAGCTGTC
69	ssa-miR-21b-3p	-1.51476	-0.399383	-0.221507	-0.00471437	0.706374	21	CGACAACAGTCTGTAGGCTGTC
70	ssa-miR-27d-1-5p	-0.698707	-0.898956	-1.58633	-1.53547	-1.36245	27	CAGGACTTAGCACACATGTGAACA
71	ssa-miR-27d-2-5p	-0.700333	-0.901401	-1.58961	-1.53994	-1.3524	27	AGGACTTAGCACACATGTGAACA
72	ssa-miR-301a-5p	-1.50833	-0.791766	-0.678977	-1.01011	-0.86584	301	GCTTTGACAATGTTGCACTACT
73	ssa-miR-30a-1-2-5p	-0.155603	-0.341573	-0.566653	-0.937929	-1.00307	30	TGTAAACATCCTACACTCTCAGCT
74	ssa-miR-30a-3-4-5p	-0.154593	-0.340502	-0.565797	-0.936512	-1.00269	30	TGTAAACATCCTACACTCTCAGC
75	ssa-miR-30e-5p	-0.607819	-0.858833	-1.21546	-1.34586	-1.60826	30	TGTAAACATCCTACACTCAGCT
76	ssa-miR-455-3p	-0.315529	-0.31209	-0.499604	-0.636696	-1.24088	455	GCAGTCCATGGGCATATACACT
77	ssa-miR-457a-3p	-0.784469	-0.567416	-0.445386	-1.16248	-0.171045	457	CCAGTATGGCTTGTGCTGCTCCA
78	ssa-miR-457ab-5p	-0.457975	-0.982638	-1.41235	-1.79877	-1.74699	457	TAGCAGCACATCATTACTGGTA
79	ssa-miR-457b-3p	-1.10465	-0.985861	-0.671862	-1.03348	0.100401	457	CCAGTATGGCTTGTGCTGCTAAC
80	ssa-miR-8163-3p	-0.706216	-0.723264	-1.33813	-1.48028	-1.33239	8163	TCAGGTCACATGTTCAGGATA
81	ssa-miR-8163-5p	-0.921378	-1.70593	-1.87207	-2.323	-1.20978	8163	TTTCTGACCATGTGACCTGGGGG
82	ssa-miR-novel-10-3p	-1.07121	-1.23995	-1.0651	-1.02676	-0.764041	novel-10	GTGACTGCACAAACGGATCTGG
83	ssa-miR-novel-12-5p	-0.715026	-0.803311	-0.674223	-1.16127	-1.02979	novel-12	TTCGCCCCTGAGGACACACGGT
84	ssa-miR-novel-13-5p	-0.930484	-1.17539	-1.01218	-1.51049	-1.73189	novel-13	CCTTGACCACGTAACCTGACCA
85	ssa-miR-novel-1-3p	-0.147472	-1.04653	-1.45503	-2.08915	-2.88117	novel-1	TCGGCATACACATCACTGACA
86	ssa-miR-novel-1-5p	-0.0918469	-0.964033	-1.03511	-1.57365	-2.15816	novel-1	TCAGTGATGTGTACGCCAAAGGT
87	ssa-miR-novel-16-3p	-1.52066	-2.04033	-2.49362	-2.5005	-3.04012	novel-16	TCAAGGCACACTTAACCAGCATGG
88	ssa-miR-novel-2-5p	-0.361238	-0.362665	-0.183502	-0.533204	-0.953721	novel-2	AGTTTCCCGGACACAGATTAAGCC
