# Supplementary material for: Expression Analysis in Atlantic Salmon Liver Reveals miRNAs Associated with Smoltification and Seawater Adaptation
Source: Biology (Basel). 2022 Apr 30;11(5):688. doi: 10.3390/biology11050688 (PMC9138835; doi:10.3390/biology11050688)
Supplement: Supplementary file 1 [file biology-11-00688-s001.zip › Table S3. Complete overview of DE-miRNAs.xlsx]

## Sheet: Sheet1
Table S3. The 88 differentially expressed miRNAs and their non-differentially expressed mature 5p or 3p family members along with their average normalised readcounts at each timepoints (T1 ‒ T6).
No.1	Mature miRNAs2	88 DE miRNA3	62 guide DE miRNAs4	Average norm. Read counts T15	Average norm. Read counts T26	Average norm. Read counts T37	Average norm. Read counts T48	Average norm. Read counts T59	Average norm. Read counts T610
1	3p_ssa_let_7a_1_3	yes	no	456.73	179.521	397.928	423.512	297.241	485.53
	5p_ssa_let_7a1	no	-	46142.3	54143.9	70920.6	73126.1	72318.7	89476.6
2	3p_ssa_let_7a_2	yes	no	468.543	235.139	316.24	289.515	209.733	374.088
	5p_ssa_let_7a1	no	-	46142.3	54143.9	70920.6	73126.1	72318.7	89476.6
3	3p_ssa_let_7b	yes	yes	1785.68	838.183	1365.16	1559.05	631.013	1193.59
	5p_ssa_let_7b	no	-	1690.17	1927.06	2022.66	1949.26	1631.79	2249.41
4	3p_ssa_let_7d_c_1	yes	no	410.752	167.918	321.541	363.917	230.056	412.797
	5p_ssa_let_7d	no	-	1936.36	2023.67	2357.13	2762.26	3211.79	3346.24
5	5p_ssa_let_7e	yes	yes	88435.8	98690.8	140859	171035	204614	250648
	3p_ssa_let_7e	no	-	3309.03	1723.71	2609.73	2600.23	2451.53	3152.4
6	3p_ssa_let_7h	yes	no	767.223	641.12	701	670.83	418.775	475.853
	5p_ssa_let_7h	no	-	9899.08	8507.82	7838.85	9503.02	13014.7	14998.7
7	3p_ssa_let_7j	yes	yes	345.174	150.135	226.682	272.994	211.369	287.656
	5p_ssa_let_7j	no	-	746.114	893.12	1124.99	1265.49	1281.64	1500.83
8	3p_ssa_miR_100a_2	yes	no	454.347	284.862	773.742	1022.05	1627.05	2388.39
	5p_ssa_miR_100a	no	-	119011	114200	120883	150252	188518	224319
9	3p_ssa_miR_101a	yes	yes	7394.85	16466.4	25228.2	24042.5	29473.3	15375.1
10	5p_ssa_miR_101a	yes	no	175.492	364.954	400.109	368.229	349.064	230.687
11	3p_ssa_miR_101b	yes	yes	7168.28	5968.05	16005.7	22398.4	33958.3	20338.6
12	5p_ssa_miR_101b	yes	no	581.41	702.623	1181.46	1659.34	1543.38	1039.28
13	5p_ssa_miR_106a	yes	yes	765.542	1284.27	1735.36	1531.56	1755.55	1521.02
	3p_ssa_miR_106a	no	no	87.2718	150.606	109.041	159.574	191.893	189.001
14	5p_ssa_miR_106b	yes	yes	773.514	1291.16	1746.88	1544.34	1765.11	1535.98
	3p_ssa_miR_106b	no	no	6.64461	3.78425	6.30702	8.05645	6.1849	6.58928
15	3p_ssa_miR_122_1	yes	yes	1721.21	826.855	755.071	591.253	492.289	601.237
	5p_ssa_miR_122	no	-	933972	1.17418e+06	848316	1.02107e+06	1.21797e+06	1.19142e+06
16	3p_ssa_miR_122_2	yes	yes	31185	7231.34	5376.93	3453.83	2126.79	1937.63
17	3p_ssa_miR_125a_1	yes	no	36.0662	21.9095	88.0686	79.8184	83.2234	107.022
	5p_ssa_miR_125a1	no	-	9582.96	11250.3	14099.4	14566.7	16558.5	18500.8
18	3p_ssa_miR_125a_2_3	yes	no	120.3	61.573	125.052	110.943	56.2378	114.309
	5p_ssa_miR_125a1	no	-	9582.96	11250.3	14099.4	14566.7	16558.5	18500.8
19	3p_ssa_miR_125b_1	yes	yes	192.793	473.391	579.734	569.415	446.509	207.04
	5p_ssa_miR_125b	no	-	510.132	953.181	1048.27	949.607	897.353	717.989
20	3p_ssa_miR_130a_2	yes	yes	446.068	835.474	1132.14	946.426	940.766	616.974
	5p_ssa_miR_130a	no	-	2197.93	2479.36	2473.72	3075.23	3049.93	2622.24
21	3p_ssa_miR_1	yes	yes	282.858	978.961	442.385	556	978.301	511.185
	5p_ssa_miR_1_1	no	-	0.521101	0.328293	0.43063	0.212891	0.923812	0.438184
22	5p_ssa_miR_142b	yes	yes	66.5747	122.856	200.1	157.746	177.56	132.135
	3p_ssa_miR_142b	no	-	776.079	854.731	1020.84	1107.34	1516.71	1284.68
23	3p_ssa_miR_146a_1_2	yes	no	79.583	69.8952	68.8496	58.3521	81.9632	406.632
24	5p_ssa_miR_146a	yes	yes	6611.73	9596.69	8526.7	9047.65	12897.6	37906.4
25	5p_ssa_miR_146b	yes	yes	87.7576	93.9736	111.678	129.218	95.3748	238.638
	3p_ssa_miR_146b	no	-	20.9908	17.5349	17.7152	23.53	12.29	26.5161
26	5p_ssa_miR_146d	yes	yes	564.032	951.851	1697.32	1630.33	1355.89	1279.22
	3p_ssa_miR_146d_1	no	-	4.39032	7.98616	8.36297	8.71813	8.54334	6.52292
27	5p_ssa_miR_148b	yes	no	164.781	108.084	97.5778	94.4769	182.449	286.629
	3p_ssa_miR_148b	no	-	29423.8	25879.7	32359.8	31148.3	35164.4	36183.3
28	3p_ssa_miR_153a	yes	yes	67.638	140.693	169.806	223.775	256.671	157.382
	5p_ssa_miR_153a_1	no	-	0.251231	1.61917	2.80794	2.27894	2.22919	2.01401
29	3p_ssa_miR_15a	yes	yes	434.672	394.498	392.004	359.426	239.196	337.74
	5p_ssa_miR_15a	no	-	1546.99	1775.67	1638.57	1539.32	1326.96	1368.71
30	5p_ssa_miR_15bf	yes	yes	127.195	86.6204	64.8211	49.6106	38.4265	31.0052
	3p_ssa_miR_15f	no	-	50.6827	37.2145	41.4381	52.1787	52.5609	81.513
31	3p_ssa_miR_15d	yes	no	50.7663	21.8467	27.0196	35.1539	26.7443	40.8047
32	5p_ssa_miR_15d	yes	yes	339.616	669.225	929.819	578.805	460.317	352.649
33	3p_ssa_miR_15e	yes	yes	227.055	181.952	147.49	214.185	143.819	178.841
34	5p_ssa_miR_15e	yes	yes	331.092	653.649	908.476	566.716	451.769	346.782
35	3p_ssa_miR_16a_1	yes	no	111.723	78.5761	75.9117	65.7259	66.343	97.5947
	5p_ssa_miR_16a	no	-	17017.5	15146	15921.1	16306.6	15706.8	17655
36	5p_ssa_miR_17	yes	yes	2599.22	3700.14	5876.15	6046.47	5815.22	6191.62
	3p_ssa_miR_17_1	no	-	33.7898	41.7686	42.4256	46.067	76.8078	78.5897
37	3p_ssa_miR_181a_2	yes	no	346.989	201.796	236.186	242.988	161.286	248.327
	5p_ssa_miR_181a1	no	-	45392.4	40570.6	44638.9	52568.2	53963.6	51664.8
38	3p_ssa_miR_181a_4	yes	no	258.936	165.312	221.499	251.348	155.859	213.465
	5p_ssa_miR_181a1	no	-	45392.4	40570.6	44638.9	52568.2	53963.6	51664.8
39	3p_ssa_miR_181e	yes	no	541.438	275.161	503.873	557.815	659.368	676.403
	5p_ssa_miR_181e	no	-	5437.24	5447.53	6857.07	7069.6	6076.95	6645.69
40	5p_ssa_miR_18bc	yes	yes	160.051	279.965	523.989	400.429	398.861	291.46
	3p_ssa_miR_18b	no	-	24.6497	17.9809	24.6816	22.2352	19.0745	24.1865
41	3p_ssa_miR_19a_2	yes	yes	1183.43	1139.04	1556.44	2103.21	2989.35	2848.82
	5p_ssa_miR_19a_2	no	-	0.377488	0.362475	0.470663	1.29641	1.08702	1.73062
42	3p_ssa_miR_200b	yes	yes	3678.04	4903.61	5754.8	7074.9	10062.3	7226.21
	5p_ssa_miR_200b	no	-	49.9428	46.2807	49.2785	62.7364	59.9867	73.0582
43	3p_ssa_miR_200c	yes	yes	151.096	221.216	262.466	377.131	623.085	366.867
	5p_ssa_miR_200c	no	-	1.45702	2.74741	3.52857	5.50426	2.87609	2.17554
44	3p_ssa_miR_200d	yes	yes	65.8152	123.455	150.042	229.51	440.428	216.733
	5p_ssa_miR_200d	no	-	4.07034	2.44074	3.11046	5.65053	5.47091	4.84704
45	3p_ssa_miR_203b	yes	yes	65.8158	49.464	53.0579	60.7067	46.2275	29.1595
	5p_ssa_miR_203b	no	-	2.99639	4.07268	4.10882	4.56716	3.3633	5.75077
46	5p_ssa_miR_205b	yes	yes	53.5276	107.63	24	28.8261	28.4608	7.65173
	3p_ssa_miR_205b_1	no	-	1.48254	1.78273	1.80936	1.4842	1.98592	1.01086
47	3p_ssa_miR_206	yes	yes	72.5227	149.74	21.5351	25.7048	59.8613	40.1599
	5p_ssa_miR_206	no	-	0.480356	0.164146	0.778848	0.332558	0.135451	0.0975105
48	5p_ssa_miR_20a	yes	yes	7011.57	10270.5	19646.1	21317	20344.5	21509.4
	3p_ssa_miR_20a_1	no	-	17.509	16.8948	18.3263	20.8448	28.6073	34.0492
49	5p_ssa_miR_210_1	yes	yes	527.914	410.694	255.362	230.746	242.055	323.477
	3p_ssa_miR_210_1	no	-	600.57	719.971	559.255	412.856	579.385	750.888
50	3p_ssa_miR_214_1_2	yes	yes	953.433	823.98	1041.25	750.559	489.768	317.915
	5p_ssa_miR_2141	no	-	238.294	290.009	286.783	339.029	429.125	324.68
51	3p_ssa_miR_214_3	yes	yes	971.663	841.982	1066.11	769.798	500.737	326.534
	5p_ssa_miR_2141	no	-	238.294	290.009	286.783	339.029	429.125	324.68
52	3p_ssa_miR_216a	yes	no	19.8765	41.5537	30.4326	21.2029	19.7096	13.9939
	5p_ssa_miR_216a	no	-	204.058	129.142	94.665	138.434	803.518	155.837
53	3p_ssa_miR_216c	yes	yes	25.5564	49.8347	55.2173	49.5662	32.8851	23.7121
	5p_ssa_miR_216bc	no	-	28.166	34.965	18.6872	20.5474	76.6576	11.5912
54	5p_ssa_miR_218a	yes	yes	133.288	216.752	210.653	272.567	519.9	784.531
	3p_ssa_miR_218a	no	-	0.90494	2.39154	1.29129	3.36864	1.61894	1.39712
55	5p_ssa_miR_218b	yes	yes	20.1127	28.2463	29.2423	40.04	83.2088	112.933
	3p_ssa_miR_218b	no	-	0.521388	0.670106	1.0151	0.244422	0.612161	0.276319
56	3p_ssa_miR_21a_1	yes	no	39.8425	20.2439	33.5392	21.706	37.3059	44.3665
	5p_ssa_miR_21a1	no	-	54459	56149.7	60376.6	66069.9	73529.7	87954
57	3p_ssa_miR_21a_2	yes	no	43.7957	17.5509	39.9002	41.0024	61.5106	87.0932
	5p_ssa_miR_21a1	no	-	54459	56149.7	60376.6	66069.9	73529.7	87954
58	3p_ssa_miR_21b	yes	no	1026.14	359.202	873.499	1038.71	1325.59	2175.73
	5p_ssa_miR_21b	no	-	99053.1	89001.2	108867	116381	132654	163311
59	3p_ssa_miR_221	yes	yes	7757.36	8285.81	8449.56	10864.2	18703.2	22386.4
	5p_ssa_miR_221	no	-	161.293	99.8431	140.343	189.025	289.462	386.085
60	5p_ssa_miR_222a	yes	yes	4841.13	5200.76	6886.75	8532.11	13082.6	16458.5
	3p_ssa_miR_222a	no	-	4423.33	4789.53	5519.65	6562.27	8948.2	10046.2
61	3p_ssa_miR_222b	yes	yes	1715.11	1937.83	2093.69	2508.38	3412.54	4356.57
	5p_ssa_miR_222b	no	-	164.494	124.19	167.894	202.136	122.816	208.311
62	5p_ssa_miR_27d_1	yes	no	159.945	98.8531	96.7564	63.828	72.4289	81.7914
	3p_ssa_miR_27d1	no	-	4094.41	3731.5	3476.55	3470.47	4738.7	5434.43
63	5p_ssa_miR_27d_2	yes	no	157.036	96.9395	94.8329	62.5381	70.8975	80.8944
	3p_ssa_miR_27d1	no	-	4094.41	3731.5	3476.55	3470.47	4738.7	5434.43
64	5p_ssa_miR_29b_1	yes	yes	37.9378	36.7927	37.268	57.5805	137.81	141.862
	3p_ssa_miR_29b	no	-	71.6228	80.498	81.4103	77.6325	152.883	155.64
65	5p_ssa_miR_301a	yes	yes	1268.06	445.738	824.66	942.63	821.99	910.852
	3p_ssa_miR_301a	no	-	159.353	173.733	256.201	236.136	297.532	199.688
66	5p_ssa_miR_30a_1_2	yes	yes	33953.5	30482.4	30100.3	27251	23074.6	22164.3
	3p_ssa_miR_30a_1	no	-	34.354	33.7679	44.4122	66.2585	47.1529	41.1759
67	5p_ssa_miR_30a_3_4	yes	yes	33814.2	30378.7	29999.1	27155.2	23002.5	22079.2
	3p_ssa_miR_30a_3_4	no	-	52.0247	57.6284	61.8673	56.4654	40.5281	49.9453
68	5p_ssa_miR_30e	yes	yes	10597.4	6954.2	6574	5441.51	5444.01	4562.57
	3p_ssa_miR_30e_1_2	no	-	22.3297	23.3932	37.3833	33.1507	32.2558	30.8211
69	3p_ssa_miR_455	yes	yes	116.339	93.5777	105.45	98.295	97.5725	64.555
	5p_ssa_miR_455_1	no	-	240.414	223.584	256.807	269.021	344.434	204.124
70	3p_ssa_miR_457a	yes	no	33.5249	19.3867	25.1395	29.4039	19.3799	39.221
71	5p_ssa_miR_457ab	yes	yes	1032.85	752.141	587.676	462.149	387.174	403.495
72	3p_ssa_miR_457b	yes	no	59.1008	27.3918	33.7065	44.282	37.3259	82.3127
73	5p_ssa_miR_462b	yes	yes	176.198	396.168	254.674	317.637	335.676	392.143
	3p_ssa_miR_462b	no	-	2.46552	4.2957	3.17937	3.87451	4.13559	5.60385
74	3p_ssa_miR_551a	yes	yes	87.8819	197.801	150.108	142.446	172.67	96.3439
	5p_ssa_miR_551a	no	-	8.07399	6.59341	10.4597	6.45984	7.56336	6.70371
75	3p_ssa_miR_551b	yes	yes	23.4459	49.3148	52.2038	49.7097	42.8315	28.006
	5p_ssa_miR_551b	no	-	2.16436	2.42198	3.1445	1.39151	1.38705	1.65217
76	3p_ssa_miR_730a_1	yes	no	44.5287	89.4063	73	56.3584	80.0089	67.2296
	5p_ssa_miR_730a	no	-	6260.62	6761.2	5894.14	6040.46	7297.69	6282.51
77	3p_ssa_miR_8163	yes	yes	110.245	67.7697	74.9809	51.4076	51.3818	57.1796
78	5p_ssa_miR_8163	yes	yes	656.066	346.594	225.804	211.504	170.007	368.299
79	5p_ssa_miR_93a	yes	yes	1371.46	1511.67	2248.29	2711.98	2907.62	3599.85
	3p_ssa_miR_93a_1_b	no	-	13.3938	15.059	11.3621	13.6979	18.2174	15.5
80	5p_ssa_miR_93b	yes	yes	106.781	159.345	190.232	230.307	340.118	263.395
	3p_ssa_miR_93a_2	no	-	28.1157	17.4692	14.8343	14.245	18.4493	18.9181
81	3p_ssa_miR_novel_10	yes	yes	533.149	254.411	253.758	302.384	340.428	408.673
	5p_ssa_miR_novel_10	no	-	599.907	418.826	372.774	426.682	503.808	665.049
82	5p_ssa_miR_novel_12	yes	yes	302.072	184.302	194.196	224.933	175.895	194.331
	3p_ssa_miR_novel_12	no	-	1.90777	1.00912	0.810262	1.72492	1.64443	0.93941
83	5p_ssa_miR_novel_13	yes	yes	85.2577	45.1978	42.5642	50.4964	39.1389	33.8679
	3p_ssa_miR_novel_13	no	-	20.2757	15.805	16.0098	18.1021	15.613	16.0901
84	3p_ssa_miR_novel_1	yes	yes	706.928	638.94	384.726	306.693	216.555	125.066
85	5p_ssa_miR_novel_1	yes	no	35.4982	33.1846	20.4516	20.6653	15.414	10.268
86	3p_ssa_miR_novel_16	yes	yes	432.508	151.068	118.326	91.7835	99.9749	69.2838
87	5p_ssa_miR_novel_16	yes	yes	85.4243	86.3673	90.5347	136.587	240.268	196.947
88	5p_ssa_miR_novel_2	yes	yes	60.7089	47.1948	53	63.3659	54.9298	40.7944
	3p_ssa_miR_novel_2	no	-	235.519	145.467	137.505	204.619	234.445	290.259
