# Supplementary material for: Expression Analysis in Atlantic Salmon Liver Reveals miRNAs Associated with Smoltification and Seawater Adaptation
Source: Biology (Basel). 2022 Apr 30;11(5):688. doi: 10.3390/biology11050688 (PMC9138835; doi:10.3390/biology11050688)
Supplement: Supplementary file 1 [file biology-11-00688-s001.zip › Table S4. Overview of differentially expressed mRNAs.xlsx]

## Sheet: Ark2
Table S4. All 5708 differentially expressed genes (log2 fold change < -0.80 or > 0.80 and p-value < 0.05 at least at one of the time points compared)
No.	QueryID	Probe annotation	T2 (log2FC)	t2 (p-value)	T3 (log2FC)	t3 (p-value)	T4 (log2FC)	t4 (p-value)	T5 (log2FC)	t5 (p-value)	T6 (log2FC)	t6 (p-value)
1	Ssa#26906	Ig-like domain	0.425808	0.238546	-0.320518	0.0910805	-0.862634	0.000757663	0.290353	0.505964	-0.115946	0.510061
2	Ssa#27096	Ig-like domain	0.30136	0.360675	-0.238343	0.291038	-0.80746	0.00578747	0.323501	0.435224	-0.0969489	0.706748
3	Ssa#63850	Ig-like domain	0.0898077	0.820765	-0.444961	0.0345498	-0.959871	0.00158797	-0.0667823	0.871318	-0.273259	0.318476
4	Ssa#CA041487	Carboxylesterase	1.63606	0.000207261	1.49497	5.08935e-06	1.36143	7.3319e-05	1.77327	0.000509712	1.11405	0.00117784
5	Ssa#CA041572	Carboxylesterase	1.47415	0.000723783	1.35331	5.35813e-05	1.25262	0.000333684	1.68901	0.00087351	0.971842	0.00488894
6	Ssa#CA055295	Na+/K+ ATPase alpha subunit isoform 9 - Ident 30	0.752666	0.13496	0.82491	0.00119714	0.70853	0.0238188	0.633389	0.101336	0.0391596	0.816192
7	Ssa#CB500159	Nuclear factor of activated T-cells 5_ tonicity-responsive	1.28659	0.00780843	0.839982	0.00398781	0.67666	0.0496362	-0.0999156	0.634516	-0.170291	0.407425
8	Ssa#CB511373	Eukaryotic translation initiation factor 4H	-0.412307	0.479692	-0.339697	0.239015	-0.525277	0.0589666	-0.759604	0.126907	-1.01088	0.0034243
9	Ssa#CB515442	Glyceraldehyde-3-phosphate dehydrogenase, spermatogenic	-0.557112	0.395267	-1.07637	7.99868e-05	-1.35316	0.00672442	-1.47395	0.000187606	-1.54092	2.35192e-05
10	Ssa#CK885088	Repetin	0.414204	0.590266	0.459561	0.426539	0.0776371	0.880745	-1.50616	0.0393593	-1.38396	0.0513021
11	Ssa#CL61Contig1	adenosine triphosphatase subunit 6	-0.524303	0.100964	-0.971631	2.86818e-05	-0.96646	3.66439e-05	-0.942414	9.09529e-05	-0.908695	0.000107054
12	Ssa#CN181057	NEDD8 precursor	0.530611	0.45404	0.983989	0.0448373	0.98237	0.124168	1.07075	0.0805971	1.42951	0.0180082
13	Ssa#DW538206	Tumor protein p63-regulated gene 1-like protein	-1.02815	0.238288	-1.88488	0.000939735	-1.97087	0.0019557	-1.9611	0.00525213	-2.0603	0.00401507
14	Ssa#DW539495	Galectin-9	1.40345	0.0118068	1.94653	7.28929e-07	1.67521	0.000191379	1.32846	0.00263399	1.02208	0.00412763
15	Ssa#DW543923	Zinc finger ZFPM1	-0.740214	0.305022	-1.74984	0.000342371	-1.72919	0.00125863	-2.09095	0.00151451	-1.90128	0.000730901
16	Ssa#DW544215	Glycogenin-1	0.558917	0.0596789	0.187178	0.509098	0.161006	0.474156	0.17969	0.360397	1.13236	0.000857982
17	Ssa#DW557213	CAP-Gly domain-containing linker protein 3	-0.938159	0.117761	-2.40519	1.42815e-06	-2.37884	1.58269e-05	-2.01933	0.000166803	-2.2658	5.89124e-05
18	Ssa#DY737052	DNA damage-inducible transcript 3 protein	0.577548	0.0497462	0.55	0.0575792	0.755132	0.0237482	2.14033	0.00969836	1.78463	0.00124801
19	Ssa#DY739986	Origin recognition complex subunit 3	0.0125603	0.956856	0.381296	0.139655	-0.12769	0.481765	0.56706	0.0517384	1.17107	0.00143577
20	Ssa#DY802075	GDH/6PGL endoplasmic bifunctional protein	-0.104713	0.696169	-0.596306	0.00167664	-0.783311	0.0056364	-0.804781	0.00211504	-0.530543	0.0142028
21	Ssa#EG647840	E3 ubiquitin-protein ligase UBR4	0.958275	0.290692	3.01726	5.81854e-07	2.45633	0.000190691	1.5709	0.0147395	0.585248	0.0899618
22	Ssa#EG759936	Galectin-9	-0.355913	0.479021	-1.25103	0.00333987	-1.34066	0.00383551	-1.28324	0.0104628	-1.31564	0.0109417
23	Ssa#EG902316	Putative nuclease HARBI1 - Ident 20	0.823854	0.037161	0.944876	0.000718527	1.03764	0.0206274	1.26447	0.00111835	0.264635	0.253898
24	Ssa#EG913141	nonclassical MHC class I antigen	1.10762	0.0566334	1.13564	0.000265029	0.758339	0.0549688	0.0566685	0.866812	-0.266671	0.150156
25	Ssa#EG917926	Chromosome transmission fidelity protein 8 homolog	-0.82706	0.0034588	0.142571	0.575782	-0.561369	0.118362	0.271829	0.370645	0.837533	0.0078199
26	Ssa#EG937297	Dentin sialophosphoprotein	-0.202664	0.703275	-0.623514	0.032273	-0.72594	0.0314776	-0.773184	0.0445453	-1.09069	0.00880322
27	Ssa#GRASP209154877	Adenylosuccinate synthetase isozyme 1	-1.11788	4.57675e-05	-1.28183	0.000877568	-2.09796	3.70966e-05	-1.51712	0.000718475	-0.399546	0.096813
28	Ssa#GRASP209155695	Proteasome assembly chaperone 1	-1.07901	0.0136171	-1.25454	0.000803207	-1.43291	0.000295884	-1.06273	0.0144391	-0.519094	0.0859087
29	Ssa#GRASP209156251	BTB/POZ domain-containing protein KCTD9	-0.11919	0.536507	0.0737692	0.632932	0.130062	0.503844	1.43609	0.00914432	1.32403	0.00103148
30	Ssa#GRASP209734617	RNA 3-terminal phosphate cyclase-like protein	0.24183	0.599007	0.709964	0.00716353	1.36405	0.000426546	0.677539	0.104679	-0.230413	0.391933
31	Ssa#GRASP209734781	Plectin	0.458982	0.224571	0.877255	0.00994674	0.808138	0.0637291	0.91651	0.0263865	0.817129	0.052167
32	Ssa#GRASP209737837	ATP synthase subunit e, mitochondrial	-0.420594	0.0854217	-1.16576	7.47215e-05	-1.52356	6.80163e-05	-0.678034	0.0120944	-0.393293	0.201399
33	Ssa#GRASP209738163	Probable dimethyladenosine transferase	-0.190532	0.728045	0.0465887	0.866205	-0.119102	0.763453	0.644697	0.0179551	1.00516	0.00568726
34	Ssa#GRASP221219533	Acyl-coenzyme A thioesterase 13	-0.807252	0.0134242	-0.781544	0.00564955	-1.04848	0.00106335	-0.0309825	0.89336	0.456142	0.123927
35	Ssa#KSS1212	Carbohydrate-responsive element-binding protein; W	0.792894	0.110837	0.78548	0.00423175	0.809465	0.00536676	0.972644	0.0479518	1.35029	0.000382454
36	Ssa#KSS1993	Homeobox protein OTX1 A	0.583286	0.13245	1.16165	4.58695e-06	0.9211	0.000395568	0.810147	0.00421833	0.769188	0.000216212
37	Ssa#KSS2012	Voltage-gated sodium channel type I alpha subunit Nav1.1La	-1.03371	0.00110856	-0.363915	0.0519405	-0.0298597	0.926868	-0.560688	0.136446	0.183102	0.403106
38	Ssa#KSS2293	Novel protein similar to vertebrate odz_ odd Oz/ten-m (Drosophila) family - Ident 98	-0.868026	0.239724	-1.69699	0.00136818	-1.79035	0.00220692	-1.68565	0.0101791	-1.85905	0.00493031
39	Ssa#KSS2369	Hepatoma-derived growth factor-related protein 2 [HRP-2] - Ident 61	0.107768	0.840881	-1.10207	0.0384087	-0.934776	0.0812709	-0.332625	0.568733	-0.837294	0.229886
40	Ssa#KSS2482	Germ cell-specific gene 1-like protein [GSG1-like protein] - Ident 54	0.482014	0.196794	0.518917	0.155972	0.492367	0.179577	0.266635	0.547187	1.10057	0.000420228
41	Ssa#KSS2646	Cortactin-binding protein 2 - Ident 45	-0.944272	0.0274541	-1.72912	3.91928e-05	-1.76469	5.56113e-05	-1.92268	0.000228586	-1.59069	0.000185568
42	Ssa#KSS2656	Low-density lipoprotein receptor-related protein 2 - Ident 31	-0.332474	0.433605	-0.822242	0.00520751	-0.87031	0.00706072	-0.736426	0.0401419	-0.832532	0.0182994
43	Ssa#KSS2758	Splicing factor, arginine/serine-rich 15	-1.21633	0.0635916	-1.79566	0.0240236	-1.79104	0.0501749	-1.28416	0.121909	-1.32702	0.0603876
44	Ssa#KSS2764	Transmembrane protease_ serine 4	-0.522847	0.158253	-1.30502	9.68072e-05	-1.05512	0.000544094	-1.11377	0.000508901	-1.67333	0.000952579
45	Ssa#KSS2962	Aprataxin - Ident 26	0.0405096	0.850321	0.748406	2.99336e-05	0.994159	0.000142844	0.734538	0.00135572	0.377565	0.00577573
46	Ssa#KSS3106	ZNF41 protein - Ident 37	0.406848	0.0986892	0.642645	0.000484665	0.659571	0.000341251	1.06133	0.000244331	0.779984	0.000328868
47	Ssa#KSS3210	paralemmin-3-like	-0.303083	0.387713	-0.676491	0.0102977	-0.808922	0.00893142	-1.12358	0.00202744	-0.89811	0.0157504
48	Ssa#KSS3343	Synapsin-1	-0.367322	0.377601	-0.875605	0.000536964	-0.888629	0.000848231	-0.923258	0.00299721	-0.868652	0.00248921
49	Ssa#KSS3392	GMP Giant mucus protein	0.499805	0.215174	1.20951	1.04081e-05	0.848557	4.75105e-05	0.74531	0.0203282	0.276772	0.00886776
50	Ssa#KSS3422	Uncharacterized protein	0.531253	0.214196	0.836083	0.0343994	0.320865	0.434286	0.90421	0.0802691	1.41692	0.0126146
51	Ssa#KSS3429	Ethanolamine kinase 1	0.55165	0.16794	1.1059	0.00085087	1.13639	0.00694606	0.860214	0.00806159	0.677847	0.0297673
52	Ssa#KSS4576	Trpm7 protein - Ident 82	0.639499	0.220593	0.929979	0.0229843	0.659364	0.141839	0.755721	0.102047	0.967202	0.0542008
53	Ssa#KSS4796	ELOVL family member 5_ elongation of long chain fatty acids (Yeast)	-0.694094	0.18902	-1.1598	0.00508229	-1.25284	0.0055601	-0.411682	0.302196	0.12902	0.763247
54	Ssa#KSS549	Novel protein	1.49149	0.0550414	0.450006	0.343118	0.861062	0.0466815	0.760172	0.0977133	0.846703	0.145313
55	Ssa#KSS606	Ryanodine receptor 1b	1.5185	0.152065	2.63792	4.09096e-05	2.82945	4.59717e-05	2.58675	0.000383374	2.46142	0.000376713
56	Ssa#NM_001123529.1	Forkhead box A3	0.523954	0.0575508	1.21357	5.70277e-06	1.01466	3.3334e-05	0.913284	0.000516097	0.874766	0.000491856
57	Ssa#NM_001123532.1	Heat shock protein 90, alpha	0.632387	0.0146599	1.16375	1.80456e-05	1.205	1.54532e-06	1.35479	3.67149e-05	1.12811	1.63953e-05
58	Ssa#NM_001123541.2	CD9 protein	0.901293	0.00284005	0.772611	0.016995	0.419548	0.189876	-0.150276	0.491334	0.133229	0.725631
59	Ssa#NM_001123546.1	Peroxisome proliferator-activated receptor delta b	-0.402008	0.224061	1.02511	0.00188678	1.07108	0.00862235	1.1789	0.00872715	0.735664	0.0423061
60	Ssa#NM_001123568.1	matrix Gla protein	-0.303207	0.422623	-0.0818335	0.83591	0.232604	0.566056	0.0595297	0.920185	-1.38428	0.0115353
61	Ssa#NM_001123570.1	interferon alpha 2	-0.575809	0.0129873	-0.285426	0.204348	-0.802605	0.000741191	-0.176454	0.366465	0.0450138	0.810424
62	Ssa#NM_001123572.1	RhAG-like protein	-0.0449514	0.880987	0.121912	0.712664	0.111023	0.731	-0.826134	0.0389126	-0.0220196	0.962539
63	Ssa#NM_001123576.1	growth hormone receptor isoform 1 precursor	0.110344	0.874279	4.44256	4.06815e-06	4.85389	9.77715e-06	4.58934	0.000126641	3.50712	0.000341746
64	Ssa#NM_001123579.1	C type lectin receptor A (clec4e)	0.637158	0.0885961	0.368776	0.172988	1.24617	0.00177171	0.471099	0.162818	0.424161	0.152117
65	Ssa#NM_001123580.1	C type lectin receptor B	-0.618329	0.0413139	-1.05952	1.4711e-05	-1.2615	1.6381e-05	-1.09714	0.000220025	-0.887878	0.000272801
66	Ssa#NM_001123595.1	protein kinase containing Z-DNA binding domains	-1.09854	0.0148054	-0.740593	0.0112675	-1.15902	0.000230054	-0.634503	0.0178816	-0.182138	0.367226
67	Ssa#NM_001123599.1	SRY-box containing gene 9b	-0.236301	0.40721	-0.464898	0.0690486	-0.620225	0.023905	-0.743779	0.0405244	-0.81065	0.0100151
68	Ssa#NM_001123602.1	Alpha-amylase 1	-0.53832	0.347753	-1.44992	0.000248826	-1.36096	0.00227717	-0.872368	0.016424	-0.887408	0.0205103
69	Ssa#NM_001123603.1	main olfactory receptor-like protein	-0.0622436	0.786909	-0.531238	0.0400916	-0.66535	0.0104496	-1.15735	0.00278154	-0.221279	0.393842
70	Ssa#NM_001123606.1	Decorin	-0.092034	0.735788	-0.767226	0.0103973	-0.781187	0.0208833	-0.924429	0.00552376	-0.642116	0.0478974
71	Ssa#NM_001123610.1	follicle stimulating hormone receptor	-0.039285	0.744181	0.532168	0.0223728	1.40367	0.00464264	0.0052316	0.959222	0.164886	0.093293
72	Ssa#NM_001123611.1	Hemicentin-like (uncertain)	0.426708	0.00363575	-0.211771	0.10666	-0.0949048	0.556538	-0.517936	0.02371	-1.22095	0.000198712
73	Ssa#NM_001123623.1	Insulin-like growth factor I	0.942717	0.119584	2.59444	7.46437e-06	2.31538	5.59341e-05	1.4267	0.00292919	1.46117	0.000743575
74	Ssa#NM_001123624.1	IGF binding protein 1	0.676633	0.258751	1.24904	0.0455989	2.79232	8.68827e-05	3.20655	8.9561e-06	1.1183	0.0291094
75	Ssa#NM_001123629.1	Eukaryotic translation elongation factor 1 alpha 1, like 1	0.495583	0.0376646	1.15775	0.000523656	1.26977	0.000322726	1.35188	0.000411194	1.20181	0.00169566
76	Ssa#NM_001123630.1	sodium- and chloride-dependent taurine transporter-like	1.84279	0.0139424	0.430565	0.416872	-0.318134	0.56989	0.0178049	0.979481	0.988941	0.191334
77	Ssa#NM_001123632.1	antithrombin protein (antithrombin)	-0.286837	0.517267	-1.23636	0.000254557	-1.12661	0.00436469	-1.09094	0.00347834	-0.970754	0.00417616
78	Ssa#NM_001123639.1	glycerol-3-phosphate dehydrogenase [NAD(+)], cytoplasmic-like (LOC106583703), X1	0.160021	0.572961	1.14347	6.33792e-05	1.18308	0.00015088	1.38871	0.00144473	0.0666623	0.757085
79	Ssa#NM_001123655.1	Serotransferrin 2	-0.472621	0.0573868	-0.838059	0.000136362	-0.83797	1.21762e-05	-0.957535	0.000212673	-0.654477	0.00106996
80	Ssa#NM_001123658.1	Ferritin, heavy polypeptide 1b	-0.134414	0.816179	0.858257	0.0170071	0.863299	0.0198344	0.854928	0.0387518	0.903414	0.0335424
81	Ssa#NM_001123669.1	metallothionein B	-0.492223	0.365616	-0.683568	0.228436	-0.765559	0.225483	-2.00931	0.0105376	-0.564344	0.361812
82	Ssa#NM_001123673.1	ATP-binding cassette B3 (MDR/TAP)	0.4366	0.450434	0.949158	0.0139804	0.92437	0.0339179	1.07891	0.0356042	0.82677	0.0778302
83	Ssa#NM_001123677.1	metallothionein A	-0.948132	0.0837476	-0.768151	0.238651	-0.718197	0.265989	-2.94018	0.000758272	-0.654695	0.402959
84	Ssa#NM_001123691.1	toll-like leucine-rich repeat [Salmo salar] Toll-like receptor 5	-0.714666	0.207885	-0.830292	0.121242	-1.13865	0.0461702	-0.952891	0.141131	-0.0267702	0.966601
85	Ssa#NM_001123692.1	albumin precursor	-0.657192	0.0794144	-1.41695	0.00020371	-1.3915	3.7279e-06	-1.40656	6.23511e-05	-1.13924	7.823e-05
86	Ssa#NM_001123694.1	Cytochrome P450 1A1	-0.253125	0.313699	-0.049725	0.75135	-0.823499	0.0107502	-1.43823	0.000264223	0.168239	0.53537
87	Ssa#NM_001123708.1	short wavelength-sensitive 1 opsin (LOC100136943)	0.720211	0.250156	1.12282	0.0314922	0.645611	0.194923	1.64578	0.00838234	1.53701	0.00775063
88	Ssa#NM_001123714.1	proteasome subunit beta type-9b	0.696722	0.0127348	-0.0224578	0.919445	-0.151152	0.482019	0.613584	0.0298803	1.1217	0.000997682
89	Ssa#NM_001136548.1	interferon regulatory factor 7	-0.397966	0.27659	-0.347687	0.243156	-0.954135	0.0204872	0.14448	0.756171	0.735395	0.0745463
90	Ssa#NM_001139601.1	DNA-directed RNA polymerase III subunit RPC7-like	1.11577	0.0211922	0.429492	0.189193	1.08795	0.00650147	0.254343	0.513502	0.158221	0.683509
91	Ssa#NM_001139612.1	v-maf musculoaponeurotic fibrosarcoma oncogene-like	-0.043838	0.866248	-0.600327	0.00144638	-0.498675	0.000322435	-0.904616	6.05881e-05	-0.746485	2.71615e-06
92	Ssa#NM_001139615.1	CDK5 regulatory subunit-associated protein 3	-0.473337	0.0575542	-0.904055	0.000273948	-1.27289	1.80496e-05	-0.773019	0.00333299	-0.360633	0.0378967
93	Ssa#NM_001139627.1	Calcium/calmodulin-dependent serine protein kinase	0.631621	0.0251487	0.129003	0.477834	0.859891	0.00177617	-0.31068	0.278675	-0.500854	0.043133
94	Ssa#NM_001139639.1	VHSV-induced protein-1	1.14632	0.00444078	0.513955	0.13694	0.142459	0.623597	-0.417849	0.200307	-0.500709	0.378969
95	Ssa#NM_001139640.1	Phosphate carrier protein, mitochondrial	-0.129267	0.577509	0.898293	0.000130257	1.28312	1.20787e-05	0.066898	0.636462	0.120419	0.455009
96	Ssa#NM_001139685.1	Betaine-homocysteine methyltransferase	-0.260563	0.549454	0.173369	0.607764	-0.472424	0.290766	-2.08011	0.0027395	-2.10517	0.00380585
97	Ssa#NM_001139689.1	small ubiquitin-related modifier 1	0.285617	0.0549004	0.40604	0.0967205	0.631424	0.00463746	1.03855	2.84369e-07	0.93524	2.38788e-05
98	Ssa#NM_001139700.1	Eukaryotic translation initiation factor 3 subunit M	0.220743	0.187407	0.51091	0.00189692	0.698169	0.000678486	0.811307	0.00245225	0.655821	0.00176334
99	Ssa#NM_001139702.1	Triosephosphate isomerase	-0.600136	0.0638362	-1.27134	0.00112714	-2.05885	0.00010591	-1.59197	0.00175187	-0.699489	0.0334131
100	Ssa#NM_001139706.1	Adenylosuccinate synthase	0.818816	0.000922508	0.595244	0.100118	0.77374	0.00634012	-0.431114	0.0872778	-0.906823	2.53692e-05
101	Ssa#NM_001139712.1	Transcription factor BTF3 homolog 4	0.261365	0.61435	0.620444	0.0618344	0.884059	0.0258137	0.778414	0.0650496	0.667101	0.101237
102	Ssa#NM_001139713.1	Calmodulin	-0.671333	0.117634	-0.558537	0.102649	-0.976485	0.0175021	0.0516735	0.89817	0.602836	0.156105
103	Ssa#NM_001139723.1	Transcription initiation factor IIE subunit beta	-0.354058	0.172839	-0.756154	8.72288e-05	-0.81367	0.000130668	-0.57862	0.00908855	-0.65019	0.00204943
104	Ssa#NM_001139764.1	ATP-dependent RNA helicase DDX51	-0.353374	0.117268	0.0681854	0.817138	-0.0158545	0.962698	0.891766	0.00389833	0.385044	0.13195
105	Ssa#NM_001139768.1	ATP-binding cassette sub-family E member 1	-0.301289	0.427555	0.372325	0.183007	0.4776	0.144787	0.821833	0.0456411	0.931634	0.0189888
106	Ssa#NM_001139775.1	Cysteine protease ATG4A	-0.360386	0.253575	-0.561299	0.077439	-0.180913	0.303786	-1.01054	0.00399006	-0.472833	0.102306
107	Ssa#NM_001139778.1	Creatine kinase B-type	0.893674	0.0930153	1.20075	0.00463893	0.854906	0.0743288	0.578836	0.16841	0.870954	0.0600147
108	Ssa#NM_001139779.1	Cell division cycle protein 20 homolog	-1.46545	0.00044206	-1.06504	0.000187904	-0.142151	0.536298	-1.39209	0.0412047	-0.462876	0.124549
109	Ssa#NM_001139785.1	Nicotinamide mononucleotide adenylyltransferase 1	-0.0291762	0.954752	0.0353137	0.846417	-0.0671416	0.737912	0.74416	0.028964	0.883665	0.00437666
110	Ssa#NM_001139790.1	Homocysteine S-methyltransferase	1.25646	0.0112634	1.51276	6.74835e-05	1.36779	0.00119524	1.1005	0.00568761	0.838736	0.0363946
111	Ssa#NM_001139792.1	mitogen-activated protein kinase-activated protein kinase 3	1.02163	0.160378	1.25187	0.0071226	1.52345	0.0216249	0.839526	0.0136051	0.916182	0.00209033
112	Ssa#NM_001139793.1	Tubulin, beta 4B class IVb	-0.416154	0.00962137	-0.814901	0.000567568	-1.10818	0.000228839	-0.314347	0.234378	-0.0667991	0.664949
113	Ssa#NM_001139799.1	Putative methyltransferase NSUN5	-0.529892	0.0349262	-0.65653	0.0113927	-0.808906	0.00750145	-0.244695	0.241514	0.021465	0.905853
114	Ssa#NM_001139809.1	Mitogen-activated protein kinase kinase 2a	0.195316	0.645903	0.676114	0.00263704	0.81709	0.00155596	0.784177	0.00617122	0.780631	0.00605198
115	Ssa#NM_001139813.1	Protein kinase C substrate 80K-H	-0.0904224	0.850392	0.55057	0.0255779	0.869693	0.00426821	0.420809	0.219931	-0.133365	0.650446
116	Ssa#NM_001139817.1	Phenylalanine--tRNA ligase beta subunit	-0.192969	0.273558	-0.320845	0.109849	-0.356993	0.0580729	1.2409	0.00602029	1.5191	4.45817e-06
117	Ssa#NM_001139822.1	Protein PRRC2B	0.463757	0.00630757	-0.068547	0.589443	-0.0470027	0.717117	-0.605182	0.00498444	-0.809853	0.000351466
118	Ssa#NM_001139825.1	Cation-dependent mannose-6-phosphate receptor	-0.291765	0.171371	-0.682429	0.00070699	-0.706172	0.000234051	-0.93894	0.000273387	-0.580099	0.00452175
119	Ssa#NM_001139828.1	Myeloid leukemia factor 2	0.708553	0.516906	2.05808	0.000624426	2.13173	0.00140219	1.8114	0.00866124	1.7096	0.0111368
120	Ssa#NM_001139829.1	Kruppel-like factor 11a	0.11063	0.793812	0.843814	0.0514974	2.03034	3.75164e-05	1.57433	0.000439866	0.589989	0.0531435
121	Ssa#NM_001139833.1	Nuclear pore complex protein Nup107	-0.691529	0.00226191	-0.583912	0.0151094	-0.931815	0.000116698	-0.209593	0.291251	0.0289261	0.860559
122	Ssa#NM_001139839.1	N-acetylneuraminate pyruvate lyase (dihydrodipicolinate synthase)	-0.773995	0.108753	-1.33912	0.00329199	-1.72108	0.00155993	-1.28606	0.0195272	-0.335592	0.474516
123	Ssa#NM_001139847.1	Phosphatidic acid phosphatase type 2 domain-containing protein 1B	0.120063	0.42977	-0.267247	0.0213702	-0.272019	0.103972	-0.788674	0.000102376	-0.8549	8.35899e-05
124	Ssa#NM_001139854.1	Mitoferrin, SLC25A28	0.252101	0.741967	0.694009	0.221275	1.15575	0.0397844	0.906329	0.119355	0.506838	0.493958
125	Ssa#NM_001139859.1	Lysosomal acid lipase/cholesteryl ester hydrolase (lipa)	-0.333951	0.241731	-0.477942	0.0353867	-0.822145	0.00124714	-1.23472	0.000185974	-0.849919	0.00100826
126	Ssa#NM_001139869.1	Choline/ethanolaminephosphotransferase 1	-0.576473	0.0312308	-0.560042	0.00715379	-0.437452	0.0441159	-0.940021	0.000755092	-0.948184	0.0105677
127	Ssa#NM_001139878.1	Fibroblast growth factor 12a	-0.501578	0.113311	-1.0238	0.00422932	-1.03147	0.00328406	-1.10041	0.00892276	-0.654042	0.0999863
128	Ssa#NM_001139879.1	Nuclear receptor-binding protein	0.349318	0.0895253	1.25825	1.60725e-06	1.24852	0.000127694	0.849806	0.00512657	0.701374	0.00308597
129	Ssa#NM_001139886.1	DNA polymerase delta subunit 3	0.641328	0.0258843	0.583313	0.0173481	0.958078	0.00154632	0.444113	0.22897	0.584079	0.0454564
130	Ssa#NM_001139891.1	Phosphoacetylglucosamine mutase	-1.3142	6.70519e-05	-1.3609	3.03472e-05	-2.58567	5.18735e-05	-1.51646	0.00126783	-0.544012	0.0164758
131	Ssa#NM_001139898.1	Glutamic pyruvate transaminase	0.499645	0.333064	0.923702	0.0356643	0.615044	0.181295	-0.288627	0.532471	0.481294	0.337037
132	Ssa#NM_001139899.1	E3 ubiquitin-protein ligase TRIM13	-0.274413	0.365987	-0.913598	8.25849e-05	-1.08976	7.73058e-05	-1.09549	0.000433378	-0.955034	0.000302591
133	Ssa#NM_001139908.1	Double-strand break repair protein MRE11A	-0.183081	0.349187	-0.62476	0.000144631	-0.964466	0.0135004	-0.59289	0.000560822	-0.469984	0.0102599
134	Ssa#NM_001139918.1	Interferon-induced GTP-binding protein Mx	0.85474	0.0328893	0.169622	0.635993	-0.279829	0.524709	0.126175	0.784911	0.269532	0.623775
135	Ssa#NM_001139920.1	Cysteine--tRNA ligase, cytoplasmic	0.0958874	0.753404	0.182736	0.457323	0.118132	0.642506	0.989621	0.0190334	1.46263	0.000790112
136	Ssa#NM_001139923.1	Beta-catenin-interacting protein 1	-0.192018	0.303297	-0.514285	0.000853867	-0.8245	0.000763674	-0.4816	0.0156572	-0.382995	0.0184221
137	Ssa#NM_001139931.1	CCAAT/enhancer binding protein (C/EBP), alpha (cebpa)	0.321475	0.450724	-0.0521582	0.886008	-0.951046	0.00512437	-1.16128	0.0158275	-1.13957	0.00527054
138	Ssa#NM_001139932.1	72 kDa type IV collagenase, mmp2	0.960212	0.00994857	0.840815	0.00483104	0.7803	0.0144992	0.846551	0.0132441	0.599146	0.0554981
139	Ssa#NM_001139934.1	Methyl-CpG binding domain protein 3b	-0.190619	0.778743	0.822471	0.00809089	0.86934	0.0138857	0.526067	0.141951	0.370348	0.272821
140	Ssa#NM_001139939.1	TFIIH basal transcription factor complex helicase XPD subunit	0.384652	0.336785	0.904401	0.000197664	0.968709	0.000357138	0.766504	0.00298216	0.75694	0.00399227
141	Ssa#NM_001139941.1	Angiopoietin-related protein 4	1.48668	0.0494408	1.4267	0.0190028	2.08715	2.94084e-05	2.78141	3.89765e-05	1.47575	0.000967508
142	Ssa#NM_001139949.1	Acetyl-CoA acetyltransferase, cytosolic	-1.09977	0.0220257	-0.831019	0.0532417	-1.57201	0.0045571	-0.904838	0.0748388	0.242713	0.549491
143	Ssa#NM_001139952.1	Probable serine carboxypeptidase CPVL	0.348552	0.130696	0.327409	0.0470371	0.712195	0.0015749	1.35593	0.000396169	0.373769	0.0946709
144	Ssa#NM_001139959.1	HEXIM protein	-0.0674116	0.859198	-0.512802	0.223971	-0.863169	0.0350455	-0.577459	0.195362	-0.0362795	0.926678
145	Ssa#NM_001139964.1	Low density lipoprotein receptor adapter protein 1-B	-0.898008	0.0120493	0.309904	0.197722	0.421623	0.0289842	0.203581	0.323093	-0.501694	0.0438482
146	Ssa#NM_001139969.1	N-acetyltransferase ESCO1	-0.947739	0.000695499	-0.786804	0.000872078	-0.972431	0.0290805	-0.763264	0.087885	-0.175955	0.484594
147	Ssa#NM_001139980.1	Acyl-CoA desaturase	-0.19535	0.622365	-0.408518	0.0312379	-0.622432	0.0212178	-0.774288	0.00330256	-0.897846	0.00259714
148	Ssa#NM_001139999.1	connective tissue growth factor	1.32503	0.00290821	0.538031	0.0846031	0.791932	0.0327959	0.385461	0.150685	-0.189602	0.352927
149	Ssa#NM_001140001.1	monoglyceride lipase	0.887217	0.0164575	1.22935	0.00127667	1.25696	0.00198254	1.19075	0.0119307	0.304289	0.353786
150	Ssa#NM_001140002.1	Integrin linked kinase	-0.499218	0.0131603	-0.917117	2.91616e-05	-1.17045	1.64024e-05	-0.909586	0.00291394	-0.686627	0.00908045
151	Ssa#NM_001140003.1	V-type proton ATPase subunit H	0.92232	0.230739	1.54531	0.0364551	1.29486	0.103766	1.25365	0.156067	1.2276	0.158974
152	Ssa#NM_001140010.1	T-complex protein 1 subunit delta	0.0567998	0.774497	0.438641	0.00292003	0.532216	0.000427748	0.835281	0.000616103	0.626384	0.00111356
153	Ssa#NM_001140019.1	Heterogeneous nuclear ribonucleoprotein L	0.527873	0.0671037	0.171214	0.458682	0.210824	0.427676	-1.16941	0.00926458	-1.20982	0.00395745
154	Ssa#NM_001140021.1	RILP-like protein 1	0.793732	0.0565272	0.546454	0.0459845	0.995064	0.00362003	0.0329226	0.914192	-0.389275	0.255602
155	Ssa#NM_001140024.1	Nucleolar protein 58	-1.22562	0.00383948	0.140078	0.709353	-0.327003	0.385151	0.512268	0.219296	0.0661268	0.880128
156	Ssa#NM_001140032.1	Polypyrimidine tract binding protein 2a	-0.147286	0.5668	-0.643452	0.000461532	-0.941968	5.49057e-05	-0.606902	0.00224109	-0.277056	0.0561009
157	Ssa#NM_001140034.1	E3 ubiquitin-protein ligase MARCH5	0.56503	0.110045	0.604999	0.0944111	0.908511	0.0140738	0.329982	0.368261	-0.0456145	0.911883
158	Ssa#NM_001140037.1	Programmed cell death 4a	1.31741	0.00424995	0.621952	0.090896	0.83863	0.0364203	0.17823	0.675291	-0.0111238	0.980665
159	Ssa#NM_001140045.1	Guanine nucleotide binding protein	-0.35989	0.00902534	-0.548244	6.50687e-05	-0.896842	0.00317897	-0.364227	0.0362598	-0.103456	0.348053
160	Ssa#NM_001140049.1	H/ACA ribonucleoprotein complex subunit 4	-0.891289	0.0492635	0.0391163	0.895834	-0.422521	0.234236	0.221101	0.439883	-0.216124	0.488261
161	Ssa#NM_001140052.1	DnaJ homolog subfamily B member 1	0.112291	0.879301	0.986245	0.00917683	1.06125	0.015057	0.75984	0.0811448	0.733528	0.0879177
162	Ssa#NM_001140054.1	Serine/threonine-protein kinase 16	0.383311	0.216398	0.963658	0.000128968	1.14642	7.11571e-05	0.824725	0.00184506	0.822752	0.00898452
163	Ssa#NM_001140070.1	Retinoblastoma binding protein 4, like	-0.831846	0.00452021	-0.602144	0.000811302	-0.403724	0.0309251	-0.444758	0.0766742	0.082599	0.582572
164	Ssa#NM_001140072.1	Secretagogin	0.804282	0.0545867	0.992107	0.00797133	1.01153	0.00489289	0.906966	0.0163317	1.06882	0.027602
165	Ssa#NM_001140078.1	Alanine--tRNA ligase, cytoplasmic	-0.309196	0.402345	-0.0928203	0.729375	-0.582911	0.0792748	0.855065	0.0431477	1.08971	0.0141403
166	Ssa#NM_001140082.1	Interferon-induced transmembrane protein 5	1.20361	0.0210801	1.88098	8.75501e-08	1.40322	0.00364768	0.641388	0.0788094	0.0373619	0.775973
167	Ssa#NM_001140089.1	V-ets erythroblastosis virus E26 oncogene homolog 2	0.910652	0.0164211	0.0483665	0.817542	0.911758	0.00674906	0.810152	0.0416088	0.473964	0.085165
168	Ssa#NM_001140098.1	target of EGR1, member 1 (nuclear) (toe1)	-0.489318	0.412116	0.486493	0.212918	0.927593	0.0469155	0.978883	0.0593149	1.25755	0.0207029
169	Ssa#NM_001140101.1	Cyclic AMP-dependent transcription factor ATF-4	0.0089066	0.993081	0.743215	0.0772198	0.0871014	0.846841	2.00504	0.00703388	2.12321	0.00331886
170	Ssa#NM_001140102.1	Aldehyde dehydrogenase 9 family, member A1b	-0.196128	0.382279	-0.666981	0.00308941	-0.994435	0.00573934	-1.11781	0.000724774	-0.781645	0.00681323
171	Ssa#NM_001140105.1	Capping protein	-0.978362	0.00189914	-0.772576	0.000201781	-0.908712	0.000304317	-0.645012	0.0100542	-0.360247	0.0634732
172	Ssa#NM_001140116.1	Sterol-C5-desaturase	-1.24541	0.0170557	-0.375236	0.300166	-0.738714	0.068651	-0.593488	0.131988	-0.208878	0.548739
173	Ssa#NM_001140122.1	ER lumen protein retaining receptor 2	-0.687731	0.00145138	-0.860236	0.000305865	-1.12255	1.54991e-05	-0.145522	0.575367	0.224456	0.122719
174	Ssa#NM_001140137.1	Interferon-related developmental regulator 1	-0.114405	0.746426	0.895823	3.30651e-05	1.14431	6.44113e-05	0.769876	0.0364353	0.886995	0.00298636
175	Ssa#NM_001140139.1	hepatocyte growth factor a	0.587285	0.33709	0.895597	0.19739	1.21833	0.0189241	0.961873	0.192829	0.476739	0.266554
176	Ssa#NM_001140142.1	EH domain-containing protein 3	-1.23023	0.0196045	-0.986607	0.0248299	-1.5332	0.00121849	-0.812057	0.113338	-0.159311	0.668601
177	Ssa#NM_001140143.1	Syntaxin 6	0.35788	0.434299	0.744741	0.0233858	0.877562	0.0126453	0.655233	0.068914	0.501819	0.143252
178	Ssa#NM_001140149.1	Phenylalanine--tRNA ligase alpha subunit	0.231954	0.608029	0.802026	0.0102835	1.02506	0.00823082	1.70441	0.00186184	1.59592	0.00224861
179	Ssa#NM_001140152.1	DNA polymerase alpha subunit B	-0.548512	0.00352033	-0.384517	0.0328639	-1.15208	0.00026809	-0.12561	0.468144	0.17861	0.192316
180	Ssa#NM_001140153.1	Polyadenylate-binding protein-interacting protein 2B	0.992764	0.0407966	0.631765	0.142278	0.562836	0.220369	0.446138	0.411721	0.604394	0.217441
181	Ssa#NM_001140157.1	Alpha-tropomyosin	-0.487891	0.206221	-0.612391	0.0769143	-1.01738	0.0222009	-2.02579	0.00075973	-1.92829	0.00244159
182	Ssa#NM_001140161.1	Importin subunit alpha-2	-1.48571	0.00237783	-0.543959	0.0275302	-0.259052	0.190977	-0.580509	0.047155	-0.69925	0.0218508
183	Ssa#NM_001140164.1	Dematin, EPB49	-0.382425	0.500606	-1.03187	0.000107281	-1.13143	0.000164616	-1.15611	0.000520253	-1.26512	6.12209e-05
184	Ssa#NM_001140166.1	DNA primase large subunit-like	-0.64626	0.0170281	-0.524786	0.0164516	-1.25958	0.00410185	-0.581204	0.048256	0.025096	0.907295
185	Ssa#NM_001140167.1	Interferon-stimulated 20 kDa exonuclease-like 1	-1.14458	0.00154219	-0.346664	0.217723	-0.645329	0.00865361	-0.157486	0.606594	0.0689725	0.768099
186	Ssa#NM_001140178.1	U3 small nucleolar RNA-associated protein 15 homolog	0.142995	0.45503	0.834816	0.000520608	0.958934	0.00104404	1.13159	0.00165771	0.672642	0.00347467
187	Ssa#NM_001140179.1	Targeting protein for Xklp2	-0.812177	0.030191	-0.155614	0.574073	0.848836	0.018314	-0.564885	0.257778	0.121681	0.730132
188	Ssa#NM_001140180.1	MCM3 minichromosome maintenance deficient 3	-0.742819	0.315861	0.58078	0.257708	-1.1977	0.0165976	0.604025	0.105691	0.821603	0.0147751
189	Ssa#NM_001140183.1	Eukaryotic translation initiation factor 2 subunit 1	-1.09335	0.00863622	-0.567496	0.0613125	-1.1558	0.00469505	0.484442	0.217701	0.7492	0.0701559
190	Ssa#NM_001140185.1	CDC45-related protein	-0.835569	0.000391108	-0.120315	0.583629	-0.73035	0.00196004	0.122011	0.665635	0.603962	0.00788117
191	Ssa#NM_001140189.1	Interactor protein for cytohesin exchange factors	0.127279	0.636973	0.858101	0.00106061	0.744311	0.0103808	0.266111	0.306722	0.229678	0.296388
192	Ssa#NM_001140192.1	Double-stranded RNA-binding protein Staufen homolog 1	-0.193834	0.464652	-0.565757	0.00268995	-0.86065	0.0021318	-0.610215	0.0189207	-0.890572	0.00258186
193	Ssa#NM_001140193.1	Methyltransferase-like protein 16	-0.110821	0.874096	1.09228	0.0272273	1.10765	0.0451532	0.993956	0.0964538	0.620035	0.264576
194	Ssa#NM_001140194.1	60S ribosomal export protein NMD3	0.340506	0.149836	0.796739	0.00390311	1.04598	0.00171341	1.66363	0.000594836	0.881786	0.0117985
195	Ssa#NM_001140199.1	Cyclin A1	-0.862388	7.75789e-05	-0.515729	0.0145127	0.112722	0.643268	-0.842941	0.0755722	-0.0431832	0.844192
196	Ssa#NM_001140202.1	RRNA 2 -O-methyltransferase fibrillarin	-0.640632	0.00755028	-0.0876896	0.767178	-0.350811	0.124375	0.684602	0.0183501	0.81661	0.00800558
197	Ssa#NM_001140205.1	Probable aminopeptidase NPEPL1	-0.0948968	0.844375	0.625712	0.0374129	0.948938	0.0121764	0.592112	0.11686	0.408912	0.245645
198	Ssa#NM_001140206.1	Cathepsin F	0.436128	0.123673	0.982025	0.00109753	1.00478	0.0034877	0.510967	0.133455	0.441586	0.118893
199	Ssa#NM_001140223.1	Protein-lysine 6-oxidase	-0.363687	0.208511	-0.864822	0.00110406	-0.799946	0.0190826	-0.444116	0.0690073	-0.0688634	0.780547
200	Ssa#NM_001140224.1	Sodium-dependent phosphate transporter 1-A	-0.5934	0.0456015	-0.599828	0.0217763	-0.906895	0.00138015	-0.706416	0.0130554	-0.751693	0.00897967
201	Ssa#NM_001140226.1	syncoilin, intermediate filament protein	-0.67338	0.129745	-0.848128	0.0220081	-1.26631	0.0127136	-0.0961576	0.831151	0.4019	0.169179
202	Ssa#NM_001140227.1	Vacuolar protein sorting-associated protein 37A	1.14586	0.00742233	0.845279	0.00605053	1.48869	1.26255e-05	0.68383	0.00626149	-0.411134	0.165213
203	Ssa#NM_001140233.1	Solute carrier family 25, member 36b	-0.843806	0.098596	-0.850895	0.0070456	-1.29971	0.000337825	-0.922702	0.0405383	-1.30818	0.0113033
204	Ssa#NM_001140234.1	Coatomer subunit gamma-1	-0.402966	0.00193504	-0.442424	0.000149735	-0.802494	0.0231865	-0.617452	0.00033731	-0.293048	0.0104696
205	Ssa#NM_001140237.1	polymerase (DNA directed) iota (poli)	1.03792	0.0294935	1.48904	0.000290318	1.65566	0.000526427	1.84817	0.000763985	1.46574	0.00227043
206	Ssa#NM_001140239.1	Methionine aminopeptidase 1	-0.694361	0.000823754	-0.52397	0.00154597	-1.09256	1.0845e-05	-0.348141	0.0853694	-0.056754	0.686118
207	Ssa#NM_001140242.1	Uroporphyrinogen decarboxylase	-0.185827	0.269619	0.771404	0.000501187	0.65892	0.0161061	1.06797	0.00104269	1.38158	0.000311201
208	Ssa#NM_001140247.1	proline-rich nuclear receptor coactivator 2	0.06973	0.887905	-1.00702	0.000226442	-0.866829	0.000640359	-1.11083	0.00034718	-1.15182	0.000375705
209	Ssa#NM_001140250.1	nucleoporin 54	0.26796	0.621352	1.39689	0.00666353	1.31917	0.01792	1.34638	0.0331119	1.24	0.0420146
210	Ssa#NM_001140251.1	Solute carrier family 37	0.480587	0.325659	1.59427	1.02357e-05	2.12496	2.92222e-06	1.39819	0.000376188	1.07539	0.00192578
211	Ssa#NM_001140256.1	TGF-beta receptor type-2, TBR3	-0.131061	0.337785	-0.534502	0.00450702	-0.392061	0.0269502	-0.733525	0.0104415	-1.11928	8.00569e-05
212	Ssa#NM_001140259.1	Rho family GTPase 1 like	0.886469	0.181476	1.05303	0.01072	1.03374	0.00241903	1.16348	0.00390247	1.05622	0.00527754
213	Ssa#NM_001140266.1	Glucosamine--fructose-6-phosphate aminotransferase 1	-1.6719	0.00407242	-1.91178	0.00340498	-3.02785	8.52574e-05	-1.89849	0.0138192	-0.496647	0.361742
214	Ssa#NM_001140270.1	MOB kinase activator 1Ba	-0.812211	0.043227	0.0445126	0.752911	-0.292009	0.252629	-0.386843	0.118423	-0.393558	0.0708042
215	Ssa#NM_001140274.1	Sepiapterin reductase	0.0625389	0.632548	-0.10359	0.426493	-0.273405	0.0384947	-1.2363	0.000108477	-0.784376	0.00116386
216	Ssa#NM_001140279.1	Thymidine phosphorylase	1.31157	0.000239195	0.414405	0.107409	0.611399	0.0367132	-0.670303	0.0467238	-1.16471	0.0107349
217	Ssa#NM_001140282.1	Leucine-rich, glioma inactivated 1a	0.320146	0.323202	-0.0877954	0.697059	0.398618	0.0798027	0.90257	0.00532996	0.577754	0.0384905
218	Ssa#NM_001140283.1	TBC1 domain family member 9	-0.397689	0.294945	-0.838317	0.00639624	-1.0164	0.00675513	-0.849884	0.0194065	-0.422281	0.173048
219	Ssa#NM_001140287.1	ribonuclease P 14 subunit	0.103135	0.737957	0.570724	0.000451342	0.964437	0.00014578	0.854114	0.000481761	0.652305	0.00409408
220	Ssa#NM_001140294.1	Coiled-coil domain-containing protein 53 (ccd53)	0.299025	0.215513	0.588025	6.63495e-05	0.84679	1.78556e-05	0.768009	0.00356649	0.736396	0.000408286
221	Ssa#NM_001140309.1	Rhomboid domain-containing protein 1	0.760045	0.127638	1.27621	0.000269294	1.4902	0.000952898	1.21343	0.00409719	0.517308	0.0736928
222	Ssa#NM_001140312.1	N-sulphoglucosamine sulphohydrolase	-0.0219569	0.96517	0.76816	0.00161041	0.925906	0.000350344	0.57312	0.0223698	0.348111	0.143094
223	Ssa#NM_001140313.1	B-cell CLL/lymphoma 6a	0.720728	0.344123	-0.617865	0.0836326	-0.92902	0.0219577	-1.44366	0.0067694	-1.16263	0.0182031
224	Ssa#NM_001140315.1	RNA-binding protein Musashi homolog 2	0.0448641	0.754968	0.139134	0.322551	-0.099518	0.538935	0.676576	0.00309936	1.03474	0.000247677
225	Ssa#NM_001140326.1	Monocyte to macrophage differentiation-associated	0.293824	0.0465834	-1.4646	5.35558e-05	-1.44112	6.64214e-06	-1.63593	0.000198488	-0.781293	0.0063247
226	Ssa#NM_001140327.1	Vasa	0.408552	0.48207	1.24214	0.00214552	1.2215	0.00731806	1.22999	0.0147919	1.28078	0.0165155
227	Ssa#NM_001140329.1	Bifunctional 3 -phosphoadenosine 5 -phosphosulfate synthase 1	0.282947	0.599186	-0.424087	0.228537	-0.852968	0.0491403	0.195972	0.672395	0.419048	0.326146
228	Ssa#NM_001140330.1	Inositol-3-phosphate synthase 1	0.151979	0.517043	-0.170276	0.242573	-0.702668	0.000476901	-1.47434	0.000125705	-1.2412	2.63687e-05
229	Ssa#NM_001140333.1	Signal peptide peptidase-like protein 2 - Ident 96	0.0862795	0.738679	0.676027	0.000100891	0.853082	6.72382e-05	0.31722	0.0277617	0.446382	0.0064452
230	Ssa#NM_001140335.1	Cation transport regulator-like protein 1	-0.252407	0.653803	-0.0895762	0.810217	-0.174572	0.691962	2.57413	0.00246649	2.28566	0.011628
231	Ssa#NM_001140336.1	arginine N-methyltransferase 3	-0.279036	0.383047	-0.0684827	0.852539	-0.546329	0.10454	0.93285	0.0624926	1.37632	0.00215642
232	Ssa#NM_001140345.1	Williams-Beuren syndrome chromosomal region 16 protein	-1.03863	0.00331492	-1.50427	0.00551922	-1.90182	7.96152e-06	-1.02093	0.0062632	-0.381445	0.233695
233	Ssa#NM_001140347.1	RuvB-like 1	-0.845819	0.00902975	-0.253672	0.359095	-0.698164	0.0198955	-0.1323	0.682828	0.1081	0.621241
234	Ssa#NM_001140348.1	Nuclear pore complex protein Nup93	-0.748306	0.000129515	-0.887565	0.00136226	-1.32971	4.21011e-06	-0.166002	0.442817	-0.14674	0.242015
235	Ssa#NM_001140351.1	Exocyst complex component 7	-0.227084	0.455765	-0.571051	0.00235642	-0.340812	0.0124914	-0.726607	0.00114406	-0.82599	0.000503439
236	Ssa#NM_001140366.1	Tumor protein D53 homolog (tpd53)	-0.592516	0.254825	0.456859	0.346217	-0.009794	0.984887	1.19887	0.0605619	2.1379	0.00669258
237	Ssa#NM_001140378.1	Farnesyl diphosphate synthase	-2.15326	0.00100051	-1.42866	0.039823	-2.80389	0.000140476	-1.82056	0.00643072	-0.864507	0.231475
238	Ssa#NM_001140382.1	Fibroleukin	1.10722	0.0144063	0.823428	0.0194257	0.838657	0.0278605	1.17928	0.0132168	1.23981	0.0107848
239	Ssa#NM_001140385.1	Golgi SNAP receptor complex member 2; Uncharacterized protein	-0.820762	0.00210338	-1.05845	0.000115575	-1.32033	3.14928e-06	-0.979052	0.000274034	-0.693361	0.00516573
240	Ssa#NM_001140395.1	COMM domain-containing protein 2	-0.0189588	0.958466	0.617278	0.00950592	0.961071	0.00240393	0.639389	0.0536117	0.463351	0.0885637
241	Ssa#NM_001140401.1	Calponin 3, acidic a	0.317144	0.390125	0.593939	0.0812314	0.490199	0.100984	0.645172	0.096711	1.52941	0.000486954
242	Ssa#NM_001140402.1	Vacuolar protein sorting-associated protein 45	0.191416	0.713723	0.705473	0.0495235	0.938171	0.0250071	0.760929	0.0943279	0.580373	0.18604
243	Ssa#NM_001140406.1	Solute carrier family 35 member B1	-0.349547	0.293159	-0.638081	0.0690013	-0.718042	0.0245374	-1.12073	0.00634939	-0.441795	0.235344
244	Ssa#NM_001140407.1	TIA1 cytotoxic granule-associated RNA binding protein-like 1	0.446543	0.23927	0.679386	0.00285619	0.873245	0.00117505	0.637406	0.016197	0.540127	0.0311122
245	Ssa#NM_001140416.1	Nucleolar GTP-binding protein 1	0.558591	0.255613	1.27693	0.00089979	1.54596	0.00148829	2.18668	0.000530508	1.44202	0.00293557
246	Ssa#NM_001140420.1	PC4 and SFRS1-interacting protein	-0.83652	0.00216305	-0.631236	0.00291206	-1.18314	6.21673e-05	-0.20581	0.26792	0.0137226	0.932465
247	Ssa#NM_001140431.1	Thioredoxin-interacting protein	1.78631	0.00472443	1.8754	0.0129953	3.50065	3.30017e-05	3.99638	1.18851e-05	1.68317	0.0875411
248	Ssa#NM_001140432.1	Inositol hexakisphosphate kinase 2	0.782491	0.135445	1.15201	0.0175225	1.53254	0.015333	1.74432	0.0105815	0.478684	0.396126
249	Ssa#NM_001140439.1	Dihydrouridine synthase 3-like	0.177535	0.674505	0.680864	0.000402258	0.68528	0.00115569	0.82153	0.00207378	0.517893	0.0251187
250	Ssa#NM_001140449.1	Phosphoenolpyruvate carboxykinase 1	-0.108866	0.537133	3.13989	0.00140528	4.13944	4.29269e-05	4.73902	0.00061824	0.676716	0.164758
251	Ssa#NM_001140451.1	Butyrate response factor 1	0.115451	0.822597	0.573404	0.265622	1.29839	0.014994	1.03514	0.00343017	-0.311517	0.27995
252	Ssa#NM_001140456.1	Sorting nexin 14	-0.336408	0.259196	-0.542406	0.00870918	-1.01364	0.138409	-0.983068	0.0036863	-0.710282	0.00395713
253	Ssa#NM_001140460.1	Cysteine conjugate-beta lyase 2	-0.611417	0.0445906	-0.809911	0.00336884	-0.875347	0.00846673	-0.827067	0.010417	-0.59098	0.0614203
254	Ssa#NM_001140462.1	Peroxisomal biogenesis factor 7	-0.732209	0.00855732	-0.36874	0.259986	-1.29862	0.000642579	-0.243138	0.439074	0.262029	0.33745
255	Ssa#NM_001140494.1	60S ribosomal protein L7-like 1	-0.271295	0.0840307	0.632016	0.00102315	0.478059	0.0474198	1.01416	0.000145757	0.767629	0.000383293
256	Ssa#NM_001140495.1	FAM53B	1.02017	0.0142464	0.454843	0.203001	0.964703	0.0258259	0.38164	0.373963	0.62268	0.136459
257	Ssa#NM_001140496.1	Diphosphomevalonate decarboxylase	-2.23507	0.00375817	-0.718483	0.135791	-2.18218	9.4402e-05	-1.06686	0.022971	0.191032	0.671973
258	Ssa#NM_001140504.1	Probable RNA-binding protein 19	0.266659	0.188456	0.534754	0.00625939	0.878523	0.00181336	1.01262	0.00285316	0.727228	0.00632479
259	Ssa#NM_001140510.1	Serine/threonine-protein kinase RIO3	0.510984	0.00857963	0.486596	0.0168901	0.688124	0.0257074	1.62016	0.000126084	1.39811	0.00120041
260	Ssa#NM_001140511.1	Tapasin-related protein	0.349121	0.277421	0.620779	0.00708438	0.676206	0.0184943	0.392458	0.175847	0.860478	0.00579181
261	Ssa#NM_001140513.1	Ribonucleotide reductase M1 polypeptide	-0.932405	0.00345217	-0.504103	0.0426437	-0.920762	0.0402349	-0.834728	0.029821	-0.187825	0.537873
262	Ssa#NM_001140514.1	Abhydrolase domain-containing protein 12	0.884708	0.0265292	0.826844	0.000456875	1.03651	4.7014e-05	1.01221	0.00277854	0.817595	0.00145952
263	Ssa#NM_001140515.1	G1/S-specific cyclin-D2	-1.05139	0.000665675	-0.76628	0.00277665	-0.928046	0.00025395	-0.675638	0.00170973	-0.749277	0.00505575
264	Ssa#NM_001140519.1	Secreted frizzled-related protein 1	-0.281314	0.364491	-0.683818	0.00277323	-0.687654	0.00151366	-0.861253	0.00158602	-0.56853	0.0039116
265	Ssa#NM_001140523.1	cellular repressor of E1A-stimulated genes 1	0.468817	0.12817	0.620325	0.0258333	0.83927	0.00349786	0.524897	0.111943	-0.0982848	0.759931
266	Ssa#NM_001140529.1	E3 ubiquitin-protein ligase RNF25	0.0460287	0.867559	0.106709	0.67962	0.430829	0.0560283	0.850693	0.00955622	0.731917	0.0256106
267	Ssa#NM_001140530.1	GC-rich sequence DNA-binding factor	0.848961	0.000319688	0.970675	0.000294036	1.19437	4.20844e-05	1.02643	0.000192112	0.648839	0.017601
268	Ssa#NM_001140539.1	Aspartate--tRNA ligase, cytoplasmic	0.392032	0.409309	0.912027	0.00303514	1.43939	0.000402741	1.91814	0.000399459	1.76861	0.000394378
269	Ssa#NM_001140544.1	Asparagine synthetase domain-containing protein 1	0.265929	0.425974	0.478096	0.129563	0.693492	0.0526926	0.889063	0.0370481	0.538694	0.151954
270	Ssa#NM_001140545.1	Integral membrane protein GPR137	1.62937	4.32805e-06	1.34304	9.34682e-05	1.73196	1.41432e-06	0.846261	0.000641752	0.438316	0.189752
271	Ssa#NM_001140550.1	G-protein coupled receptor 182	0.563753	0.113859	0.607696	0.0106715	0.956906	0.00507058	0.418133	0.127281	-0.350856	0.184069
272	Ssa#NM_001140552.1	F-box only protein 42	0.666597	0.137139	0.865327	0.0388311	0.807751	0.0868723	0.580924	0.238303	0.572103	0.241139
273	Ssa#NM_001140555.1	DNA repair protein RAD51 homolog 1	-0.822138	0.00114613	-0.353205	0.0584902	-0.565496	0.156262	-0.410507	0.127417	0.075178	0.760258
274	Ssa#NM_001140556.1	Nucleolar protein 56	0.508316	0.408674	0.973957	0.0216983	0.814974	0.0884588	1.16181	0.135452	0.708127	0.0290029
275	Ssa#NM_001140557.1	DnaJ	0.15122	0.795507	-0.727604	0.209799	-1.14729	0.0269392	-0.817501	0.123717	0.196777	0.79024
276	Ssa#NM_001140560.1	Chloride intracellular channel protein 2	-0.0617942	0.85355	-0.54524	0.0142883	-0.738029	0.00149843	-1.05552	0.00148092	-0.91785	0.00116632
277	Ssa#NM_001140570.1	Skeletal muscle and kidney-enriched inositol phosphatase	0.867845	0.000674119	0.894819	0.000115993	1.03262	0.000199463	0.520147	0.0228604	0.443081	0.0374584
278	Ssa#NM_001140578.1	Di-N-acetylchitobiase	0.446559	0.497756	1.06179	0.003967	1.23719	0.00335218	1.71995	0.00142448	1.13188	0.0108936
279	Ssa#NM_001140587.1	Ribonuclease H2 subunit C	-0.787766	0.0114194	-0.491595	0.0101132	-0.818851	0.0014078	0.0120255	0.939682	0.352746	0.130331
280	Ssa#NM_001140595.1	Transmembrane 4 L6 family member 1	-0.313735	0.0387625	-0.286147	0.201303	0.0200554	0.892504	0.45707	0.086249	0.998209	0.000276676
281	Ssa#NM_001140601.1	LYR motif containing 1	-0.0405384	0.892415	-0.603025	0.00761268	-1.05136	0.0112184	-0.174709	0.283949	-0.394162	0.104186
282	Ssa#NM_001140616.1	Borealin	-1.06836	0.00284002	-0.624396	0.0158406	0.00714958	0.983008	-0.899921	0.13104	-0.180379	0.54742
283	Ssa#NM_001140620.1	Transmembrane 6 superfamily member 1	-0.210939	0.0416965	0.583971	0.0332366	1.42259	5.47813e-05	0.597771	0.161792	-0.0728275	0.450034
284	Ssa#NM_001140622.1	60S ribosomal protein L26	0.249216	0.693305	0.736378	0.0936702	1.23656	0.0305473	1.64555	0.01496	1.03879	0.0864725
285	Ssa#NM_001140627.2	Multiple coagulation factor deficiency protein 2	-1.44152	0.00725195	-0.856008	0.0205669	-0.321527	0.342761	-0.0581713	0.910798	-0.158589	0.749204
286	Ssa#NM_001140632.1	Down syndrome critical region protein 3	-1.02844	0.0283746	-1.02899	0.00222832	-0.880491	6.40343e-06	-0.971835	0.00177943	-0.75487	0.00232197
287	Ssa#NM_001140634.1	Probable tRNA	-0.485869	0.175236	-0.308195	0.399092	-0.901765	0.0133878	0.019055	0.954489	0.323729	0.316504
288	Ssa#NM_001140643.1	N6-adenine-specific DNA methyltransferase 1	-1.25715	0.0121001	-0.27699	0.445518	-0.365832	0.347964	0.0606425	0.858849	0.119261	0.697399
289	Ssa#NM_001140650.2	nuclear receptor subfamily 0 group B member 2	0.45733	0.506427	1.26639	0.00121802	0.896177	0.000144361	1.2119	0.0016476	0.765705	0.00903614
290	Ssa#NM_001140657.1	Damage-regulated autophagy modulator	-0.383996	0.0941456	-0.694805	0.00165814	-0.897228	0.00320186	-0.14091	0.514909	0.0075943	0.962638
291	Ssa#NM_001140662.1	TANK-binding kinase 1-binding protein 1	0.014724	0.960302	0.972049	0.000474272	0.976514	0.00182601	1.41173	0.000321595	0.789102	0.00579581
292	Ssa#NM_001140671.1	Abhydrolase domain-containing protein 14A	0.293679	0.358215	0.559439	0.107747	0.669935	0.0374775	0.972795	0.00871678	1.20511	0.000629491
293	Ssa#NM_001140674.1	Cytosolic sulfotransferase 2	-1.15691	0.0833178	1.26889	0.0313972	1.46899	0.0269472	0.519326	0.369325	0.936535	0.243139
294	Ssa#NM_001140675.1	D-tyrosyl-tRNA	-1.11166	0.00125484	-1.31755	0.00093064	-1.94741	1.51093e-05	-0.576279	0.0647866	-0.00193928	0.993719
295	Ssa#NM_001140683.2	Creatine kinase, muscle a	-0.198596	0.519057	-0.874635	0.000587796	-0.350216	0.237145	-0.389343	0.398362	-0.140406	0.672517
296	Ssa#NM_001140697.2	Glutaredoxin-like protein YDR286C homolog	0.674423	0.113875	1.10655	0.00138923	0.718579	0.0295326	0.664624	0.0641304	0.754548	0.0302189
297	Ssa#NM_001140700.1	MKI67 FHA domain-interacting nucleolar phosphoprotein-like	-0.580081	0.0236242	0.243924	0.470192	-0.193375	0.544521	0.909527	0.0177052	0.816421	0.028279
298	Ssa#NM_001140701.1	Amyloid protein-binding protein 2	-0.356709	0.529089	0.113297	0.741532	-0.0667499	0.860987	-1.04987	0.0431104	-0.754091	0.111063
299	Ssa#NM_001140703.1	Acidic leucine-rich nuclear phosphoprotein 32 family member A	0.327713	0.0521048	0.644296	0.0139171	1.15139	8.42275e-05	0.448478	0.0991876	0.119348	0.424382
300	Ssa#NM_001140718.1	BCL2-associated athanogene 3 - Ident 44	0.584008	0.0974546	-0.209571	0.294041	-0.137972	0.447062	-0.784243	0.0218527	-1.26822	0.000799361
301	Ssa#NM_001140724.1	HIU hydrolase	0.472301	0.347307	-1.51649	0.00328496	-0.845856	0.130802	0.554797	0.279951	0.43694	0.437658
302	Ssa#NM_001140734.2	Thymosin beta-12	0.305718	0.125072	0.291261	0.0976439	0.196825	0.257682	0.272772	0.366475	1.34761	0.00200329
303	Ssa#NM_001140755.1	Glutathione S-transferase 3	-0.707141	0.16501	-1.06398	0.0311253	-1.58961	0.00861335	-1.30474	0.0350504	-1.12108	0.0623706
304	Ssa#NM_001140756.1	60S ribosomal protein L7a	0.372268	0.12308	0.705033	0.00423868	0.466186	0.181865	1.02464	0.00203967	0.702694	0.0154555
305	Ssa#NM_001140762.1	Extracellular superoxide dismutase (sode)	0.342671	0.616154	-1.5755	0.044973	-0.344248	0.660874	0.264374	0.696693	-0.114303	0.883534
306	Ssa#NM_001140763.1	Heterogeneous nuclear ribonucleoprotein A1	0.155814	0.718057	1.0931	0.0021772	0.892204	0.01244	1.15088	0.00851081	1.09241	0.0130761
307	Ssa#NM_001140765.1	SPRY domain-containing protein 4	-0.595009	0.130484	-0.663688	0.0744391	-1.00871	0.0197463	-1.12478	0.0263814	-1.07015	0.0296215
308	Ssa#NM_001140768.1	Protein SEC13 homolog	-0.409233	0.209283	-0.770252	0.0118295	-1.09925	0.00249573	-0.483619	0.14375	0.0899192	0.758466
309	Ssa#NM_001140769.1	Replication factor C subunit 4	-0.55146	0.007029	-0.360917	0.0145845	-1.0816	0.000410695	-0.0672174	0.516349	0.298825	0.0490469
310	Ssa#NM_001140771.1	coiled-coil domain containing 124	-0.166847	0.619609	0.68844	0.00213564	0.82347	0.000695542	0.732644	0.00177242	0.564906	0.00647273
311	Ssa#NM_001140777.1	Probable cytochrome b5 isoform 2	-0.479937	0.436125	-1.265	0.0104407	-1.43608	0.00902892	-1.57226	0.0397466	-1.5621	0.0122766
312	Ssa#NM_001140782.1	40S ribosomal protein S14	0.289091	0.673283	0.98896	0.00126963	0.991577	0.00196559	1.00114	0.00456337	0.989583	0.00286729
313	Ssa#NM_001140795.1	2-aminoethanethiol dioxygenase	-0.84338	0.0202984	-0.663134	0.0136964	-1.01426	0.000970538	-0.627829	0.0267573	-0.0555485	0.818657
314	Ssa#NM_001140802.1	NADH dehydrogenase 1 subunit C2	0.137785	0.60267	0.365423	0.00781269	0.696252	0.00560447	1.04663	0.000524398	0.72425	0.00208074
315	Ssa#NM_001140817.2	COP9 signalosome complex subunit 7a	0.732525	0.0789643	1.42083	9.7145e-07	1.58685	1.89959e-06	1.5483	1.49409e-05	1.41933	1.89887e-05
316	Ssa#NM_001140819.2	Coronin-1A	0.577438	0.324901	1.02217	0.000240727	1.11688	0.00128958	0.661882	0.0118173	0.645306	0.00632439
317	Ssa#NM_001140824.1	methyltransferase NSUN6	0.188623	0.605456	0.112201	0.569556	0.382324	0.0664031	1.06963	0.000520831	0.662475	0.00327555
318	Ssa#NM_001140831.1	Growth arrest and DNA-damage-inducible proteins-interacting protein 1	-0.539035	0.00461194	-0.547986	0.0101627	-0.858144	0.000277072	-0.111384	0.386194	0.052253	0.750453
319	Ssa#NM_001140832.2	Exosome complex component RRP41	-0.413737	0.49171	1.13936	0.0045467	1.15884	0.0050584	1.76336	0.00103489	1.61659	0.00167822
320	Ssa#NM_001140842.1	partner of NOB1 homolog (S. cerevisiae) (pno1)	0.678305	0.0122715	1.34844	6.17746e-05	1.47002	6.49207e-05	2.35284	2.82265e-05	1.30201	0.000533414
321	Ssa#NM_001140844.1	Annexin A2a	-0.524075	0.235355	-1.40139	0.00275179	-0.727133	0.124262	-0.605332	0.237625	-0.267576	0.606134
322	Ssa#NM_001140849.1	Hepcidin-1	0.224794	0.838304	2.55715	0.00373289	1.94878	0.00502612	2.75961	0.00523363	2.7645	0.00158318
323	Ssa#NM_001140873.1	LETM1 domain-containing protein 1	0.473327	0.451943	0.627899	0.175371	0.941662	0.104535	1.25903	0.0289385	1.41308	0.0337441
324	Ssa#NM_001140885.1	Nuclear receptor 2C2-associated protein (nr2ca)	-0.944983	0.00354857	-0.857967	0.0113369	-1.45865	0.000253418	0.0262216	0.895786	-0.0468017	0.845648
325	Ssa#NM_001140914.2	Vesicle-trafficking protein SEC22b-B	-1.11575	0.00129028	-0.566559	0.0387101	-1.04067	0.000309865	-0.572327	0.0587095	-0.408262	0.0813421
326	Ssa#NM_001140926.1	Lecithin retinol acyltransferase	0.695784	0.156233	-0.139672	0.5644	-0.393945	0.240046	-0.930452	0.0107748	-0.52306	0.172884
327	Ssa#NM_001140927.1	DNA-directed RNA polymerase I subunit RPA12	0.0498516	0.865859	0.770905	2.16508e-06	1.03015	4.78652e-06	1.12651	2.46079e-05	0.925468	4.27651e-05
328	Ssa#NM_001140934.1	Glucosamine 6-phosphate N-acetyltransferase	-0.480359	0.0314715	-0.703893	0.0076836	-1.19946	0.000122935	-0.599922	0.0648177	0.124195	0.638229
329	Ssa#NM_001140946.1	Phosphopantothenate--cysteine ligase	-1.39557	0.000135572	-0.779373	0.00576514	-1.18556	0.000525172	-0.879477	0.0121526	-0.495265	0.063879
330	Ssa#NM_001140950.1	AP-4 complex subunit sigma-1	0.219838	0.528353	0.91436	9.21117e-05	1.04628	0.000115943	1.01985	0.000269651	1.04118	5.37928e-05
331	Ssa#NM_001140954.1	U5 small nuclear ribonucleoprotein 200 kDa helicase	0.509208	0.234292	0.863966	0.0277452	0.978931	0.024555	1.11244	0.0329229	1.16432	0.0272045
332	Ssa#NM_001140960.1	Proteasome subunit alpha type-5	0.256221	0.570188	1.08063	0.0336462	0.857735	0.124225	0.354891	0.54781	1.29041	0.0638664
333	Ssa#NM_001140977.1	SS18-like protein 2	-0.467328	0.0850535	-1.09241	8.59e-05	-1.07724	0.000330746	-0.912229	0.00121017	-0.735035	0.0064295
334	Ssa#NM_001140978.1	TM2 domain containing 1	0.867797	0.308854	2.22027	1.9891e-07	1.48912	0.00180119	0.834757	0.0546276	0.147762	0.496986
335	Ssa#NM_001140994.2	DNA-directed RNA polymerase III subunit RPC8	0.0349126	0.946186	1.39818	0.00741422	0.556171	0.281953	1.23705	0.0774241	1.83584	0.00430375
336	Ssa#NM_001141007.1	Pseudouridine-5-monophosphatase	-0.620874	0.0106341	-0.731676	0.0044224	-0.890827	0.0166861	-0.999421	0.0461956	0.104757	0.668721
337	Ssa#NM_001141009.1	all-trans retinoic acid-induced differentiation factor-like	-0.0614102	0.83831	0.405861	0.151565	0.740149	0.0245076	0.93112	0.00703547	-0.585973	0.0459983
338	Ssa#NM_001141010.1	Transmembrane protein 107 - Ident 61	0.517779	0.0132234	0.543659	0.00876735	0.661865	0.00851814	0.843086	0.000961431	0.804458	0.00150665
339	Ssa#NM_001141012.1	COMM domain-containing protein 3	-0.163632	0.724414	0.705981	0.000573656	0.949113	0.000317818	0.940501	0.0116469	0.699388	0.00327243
340	Ssa#NM_001141018.1	Williams-Beuren syndrome chromosomal region 18 protein homolog	-1.0372	0.00267808	-0.590082	0.00518687	-0.548334	0.00882847	-0.387513	0.0883227	-0.548048	0.0230577
341	Ssa#NM_001141019.1	centromere protein N	-0.969914	0.00245045	-0.691389	0.00491828	0.0749162	0.773154	-0.810076	0.0876208	-0.0155791	0.950959
342	Ssa#NM_001141021.2	Alcohol dehydrogenase 8b	0.146501	0.382306	0.48634	0.00733778	0.557531	0.0171466	0.84025	0.00395147	0.684569	0.00329186
343	Ssa#NM_001141028.1	C-X-C motif chemokine 10	0.717654	0.071488	0.713725	0.0378521	0.424333	0.227892	1.12541	0.0174793	0.889996	0.0314017
344	Ssa#NM_001141031.2	neuroblast differentiation-associated protein AHNAK-like (LOC106587593), X1	-0.731128	0.00361602	-0.545097	0.00649568	-0.956129	0.00056055	-0.915255	0.00230634	-0.584297	0.0148844
345	Ssa#NM_001141032.1	Homologous-pairing protein 2 homolog	-0.98103	0.00158627	-0.704542	4.13736e-05	-0.582368	0.0997249	-0.529315	0.136642	-0.0377158	0.815302
346	Ssa#NM_001141035.1	E3 SUMO-protein ligase NSE2	-0.741759	0.125447	0.449434	0.25421	0.19647	0.66043	0.648961	0.208516	1.08494	0.0473024
347	Ssa#NM_001141056.1	Magnesium-dependent phosphatase 1	1.05118	0.183698	2.44836	1.47515e-07	2.53912	5.15626e-06	2.49621	7.93328e-05	1.16672	0.000684787
348	Ssa#NM_001141059.1	Dual specificity protein phosphatase 14	0.331241	0.409078	0.734376	0.0545553	0.907948	0.0327527	0.475396	0.138717	0.849613	0.0467322
349	Ssa#NM_001141074.1	retinoic acid receptor responder protein 3-like	0.638405	0.131822	0.83002	0.044297	0.991175	0.017668	1.08078	0.0238561	0.291518	0.460086
350	Ssa#NM_001141081.1	FK506 binding protein 5	1.14444	0.00907525	1.05888	0.00150076	2.07029	7.94505e-06	2.58177	4.59323e-05	0.742573	0.160187
351	Ssa#NM_001141085.1	WD repeat domain-containing protein 83	0.754015	0.00941969	0.859899	0.00102584	0.821175	0.00214877	0.460715	0.129254	0.29664	0.218437
352	Ssa#NM_001141086.1	Bcl2-like 1	0.854209	0.0290105	0.854223	0.0136766	0.904529	0.0276272	1.05247	0.0300436	0.251254	0.540146
353	Ssa#NM_001141090.1	RAB35, member RAS oncogene family	-0.527988	0.00469291	-0.562087	0.000518066	-0.866703	6.43544e-05	-0.930878	0.000124556	-0.7583	0.000734922
354	Ssa#NM_001141094.1	60S ribosomal protein L15	0.645793	0.296559	1.2091	0.00475222	1.26693	0.00847787	1.1581	0.0219238	1.08323	0.0294183
355	Ssa#NM_001141095.1	Nucleoside diphosphate kinase 7	0.226767	0.382855	0.525145	0.00480363	1.17662	8.1842e-06	0.686826	0.00347752	0.253972	0.0716196
356	Ssa#NM_001141098.2	arylformamidase; AltName: Full=Kynurenine formamidase; Short=KF	0.3868	0.114412	0.485057	0.0274158	0.844603	0.00286761	1.02558	0.00297312	-0.0276082	0.917812
357	Ssa#NM_001141103.2	Death-associated protein-like 1-A	0.732213	0.0468919	0.56256	0.02312	0.952838	0.00784864	0.0887042	0.784049	0.0777356	0.781248
358	Ssa#NM_001141115.1	Argonaute RISC catalytic component 3b	-0.115635	0.827029	0.810956	0.0159655	0.908927	0.0167484	0.726709	0.0606038	0.826344	0.0375673
359	Ssa#NM_001141122.2	Calcineurin B homologous protein 2	-0.280572	0.183873	-0.817573	0.00417652	-0.220348	0.2748	-1.69933	0.00451966	-1.01497	0.000712513
360	Ssa#NM_001141129.1	Eukaryotic translation initiation factor 6	-0.064428	0.757294	0.470565	0.0363078	0.265004	0.249399	0.697175	0.029414	0.853105	0.00846517
361	Ssa#NM_001141155.1	cyclin-dependent kinase 2 interacting protein	0.441084	0.130084	0.261806	0.338049	0.178913	0.50489	0.812045	0.0226233	0.889348	0.0112234
362	Ssa#NM_001141160.1	Mediator of RNA polymerase II transcription subunit 4	0.840784	0.180253	1.22842	0.00885636	1.44725	0.0072123	0.908042	0.0827952	0.71948	0.157043
363	Ssa#NM_001141164.1	40S ribosomal protein S26	0.616977	0.0791821	0.597969	0.0125638	0.825777	0.00351534	1.15043	0.000434683	0.825184	0.0153745
364	Ssa#NM_001141173.1	cysteine and glycine-rich protein 2	-0.236827	0.374578	-0.937462	0.000342498	-0.768149	0.00753561	-0.842136	0.00842869	-0.494587	0.0390996
365	Ssa#NM_001141174.1	phosphoglycolate phosphatase	-1.05563	0.00711779	-1.57077	0.000112488	-2.03037	2.94675e-05	-1.30766	0.00600221	-0.566195	0.0863429
366	Ssa#NM_001141177.1	Coiled-coil domain-containing protein 56	0.38029	0.532443	0.906188	0.0151282	1.25714	0.00315324	0.628927	0.114076	0.935748	0.0456884
367	Ssa#NM_001141179.1	DNA replication complex GINS protein PSF3	-0.53569	0.558243	-0.33938	0.340795	-0.174107	0.696543	-1.0612	0.0258729	-1.27412	0.00328009
368	Ssa#NM_001141185.1	proteasome (prosome, macropain) 26S subunit, non-ATPase, 9 (psmd9)	0.74317	0.0212627	0.753474	0.00630107	1.21974	0.000396936	0.921054	0.0123434	0.791662	0.0268324
369	Ssa#NM_001141197.2	Ubiquitin-conjugating enzyme E2Na	-1.82514	0.112911	-2.15767	0.0521539	-2.01063	0.0692452	-0.944042	0.356671	-2.66488	0.0139445
370	Ssa#NM_001141208.1	E3 ubiquitin-protein ligase RNF181	-0.683065	0.000735418	-0.693237	0.00027704	-1.25767	0.000611177	0.00178088	0.990186	0.335455	0.00832456
371	Ssa#NM_001141210.1	Sister chromatid cohesion protein DCC1	-1.07581	0.00145129	-0.501366	0.110046	-1.10348	0.00355681	-0.0457586	0.873	0.341444	0.196175
372	Ssa#NM_001141211.2	CG024 protein	0.874807	0.00280872	0.553296	0.0319469	1.40729	0.00079695	0.823927	0.0499415	0.0259942	0.919979
373	Ssa#NM_001141215.1	processing of precursor 5, ribonuclease P/MRP subunit (S. cerevisiae) (pop5)	-0.147214	0.598167	0.0660902	0.825561	-0.0631331	0.859094	0.602398	0.166171	0.825873	0.0404474
374	Ssa#NM_001141222.1	Transcription factor 12	0.814667	0.123062	1.61044	0.000283791	1.32689	0.00622924	0.830354	0.136396	0.403662	0.283117
375	Ssa#NM_001141233.1	Peptidyl-prolyl cis-trans isomerase H	-0.330063	0.449985	0.340691	0.0956887	0.531218	0.0347367	0.728362	0.0133156	1.10312	0.00105514
376	Ssa#NM_001141243.1	Thymidylate synthase	-0.130133	0.836111	0.87667	0.0343521	1.18178	0.0337283	0.785763	0.139389	1.33876	0.0180922
377	Ssa#NM_001141252.1	Lysophospholipase-like protein 1 (lypl1)	-0.594062	0.0470985	-0.86384	9.12366e-06	-0.833193	0.000280709	-1.00957	0.000138584	-0.897753	0.00020047
378	Ssa#NM_001141253.1	CL032 protein	-0.304903	0.148114	-0.2852	0.12663	-0.0719473	0.736105	-0.834969	0.0134359	-0.289061	0.226326
379	Ssa#NM_001141258.1	Alba-like protein C9orf23	-0.341989	0.005733	0.398395	0.00442586	0.436307	0.0313058	1.03717	4.7906e-05	0.675073	0.000821402
380	Ssa#NM_001141261.1	S-acyl fatty acid synthase thioesterase, medium chain	0.44783	0.489853	0.751103	0.0590995	1.0797	0.0134467	0.894079	0.113429	1.04726	0.0356915
381	Ssa#NM_001141270.1	Small nuclear ribonucleoprotein polypeptide B2	-0.921964	0.0845393	-0.50353	0.0866137	-1.0831	0.000870563	-0.128952	0.695565	0.475163	0.0838729
382	Ssa#NM_001141278.2	Integrin beta-1-binding protein 1	-0.639006	0.020239	-0.998361	1.77949e-05	-1.27399	8.81235e-06	-1.31437	7.42438e-05	-0.824921	0.000387912
383	Ssa#NM_001141282.2	Dynein light chain 1, axonemal	0.714288	0.00919272	1.01238	0.000718341	1.06612	0.00082033	0.71349	0.0253961	0.71737	0.0333845
384	Ssa#NM_001141286.1	Stromal cell-derived factor 2-like protein 1	-0.997558	0.0122731	-1.14834	0.0042147	-1.22858	0.00322208	-1.16647	0.00819715	-0.55919	0.177125
385	Ssa#NM_001141289.1	GTP-binding protein RAY-like	0.184707	0.402263	0.689799	0.00165302	1.20914	1.18515e-05	0.729076	0.0479669	0.302876	0.0725848
386	Ssa#NM_001141291.1	60S ribosomal protein L13	0.502669	0.325502	0.869113	0.0103181	0.957469	0.0215611	1.33399	0.00385523	1.05046	0.019936
387	Ssa#NM_001141306.1	40S ribosomal protein S19	0.514171	0.0269918	0.397665	0.0239289	0.353036	0.124249	1.09235	0.000540719	0.864419	0.0114571
388	Ssa#NM_001141314.1	Replication factor C subunit 2	-0.851674	0.000171062	-0.492534	0.0514854	-0.955534	0.00729892	-0.282979	0.286489	0.252563	0.20873
389	Ssa#NM_001141316.2	Arginase-1	-0.311187	0.515841	-0.625783	0.0738195	-0.490587	0.233181	-1.22387	0.0119179	-0.417416	0.36032
390	Ssa#NM_001141317.1	40S ribosomal protein S3a	-0.886903	0.0608785	-1.27506	0.00023033	-1.28902	0.000679299	-1.25819	0.00217935	-1.41479	0.00105487
391	Ssa#NM_001141320.2	T-lymphocite maturation associated protein Myelin and lymphocyte protein	0.195852	0.543423	0.131188	0.569206	0.13763	0.56817	0.802684	0.0151389	0.374066	0.266728
392	Ssa#NM_001141324.2	Gem-associated protein 6	-0.223695	0.165677	-0.933256	4.39296e-05	-1.00373	1.06703e-05	-0.634722	0.00676995	-0.367053	0.0158939
393	Ssa#NM_001141334.2	Death-associated protein-like 1-B	0.541743	0.239644	0.720559	0.0179491	1.14358	0.00592185	0.553496	0.193843	0.43444	0.250381
394	Ssa#NM_001141335.1	Peptidyl-prolyl cis-trans isomerase E	-0.701679	0.00263592	-0.890713	8.34472e-05	-1.25183	0.00187531	-0.42572	0.0149637	-0.20875	0.119577
395	Ssa#NM_001141336.1	Pyrroline-5-carboxylate reductase 2	-0.962581	0.0951569	-0.64694	0.0120087	-1.48818	9.86101e-05	-0.126304	0.742509	0.313397	0.230525
396	Ssa#NM_001141338.1	metallothionein	-0.883025	0.0675742	-1.29535	0.00511274	-1.05516	0.0233151	-1.40603	0.0122627	-0.361149	0.47166
397	Ssa#NM_001141368.1	NME/NM23 nucleoside diphosphate kinase 2a	-0.802418	0.00628407	-0.0978624	0.564548	-0.266491	0.115619	-0.437666	0.0211684	0.125026	0.352005
398	Ssa#NM_001141370.1	signal peptidase complex subunit 2 homolog (S. cerevisiae) (spcs2)	-0.649932	0.025311	-0.367802	0.0765283	-0.0133617	0.946246	-0.932973	0.0109439	-0.283705	0.481094
399	Ssa#NM_001141375.1	Actin-related protein 2/3 complex subunit 5	-0.26099	0.234527	-0.554507	0.00670641	-0.873972	0.000109039	-0.615226	0.0140266	-0.271413	0.0906534
400	Ssa#NM_001141378.1	M-phase phosphoprotein 6	-0.894619	0.0111847	-0.974469	0.000390048	-1.39417	0.000253155	-0.28127	0.193809	-0.0791732	0.68052
401	Ssa#NM_001141379.1	ATP-dependent RNA helicase DDX39	-0.165808	0.22349	0.451528	0.0460113	0.345336	0.123591	-0.47454	0.687846	0.906779	0.000829222
402	Ssa#NM_001141389.1	methyltransferase-like protein 13-like	0.38643	0.276881	0.782595	0.000597969	0.379056	0.0286424	2.05561	0.000115962	2.69217	6.87039e-08
403	Ssa#NM_001141394.1	regucalcin	-0.795996	0.0377953	-1.22161	0.0016939	-1.26855	0.00425178	-1.25411	0.00684993	-1.20459	0.00941228
404	Ssa#NM_001141398.1	B-cell CLL/lymphoma 7 protein family member A	-1.26143	2.03992e-05	-0.129701	0.557752	-0.923963	0.00667541	-0.134087	0.561734	-0.388619	0.227124
405	Ssa#NM_001141404.2	Prohibitin-2; cDNA FLJ60175, highly similar to Prohibitin-2	0.123635	0.822753	1.03264	0.00081884	1.03565	0.00126913	1.02486	0.00456705	1.01806	0.00365623
406	Ssa#NM_001141428.2	Dual specificity protein phosphatase 23	-0.446729	0.0958706	-0.0913104	0.910923	-0.847646	0.00103715	-0.239693	0.285216	0.172266	0.573735
407	Ssa#NM_001141433.2	Butyrophilin subfamily 2 member A2	-0.289002	0.207555	-0.46299	0.00170091	-0.833041	0.000184286	-0.625575	0.0077739	-0.649901	0.00105292
408	Ssa#NM_001141434.1	Tripartite motif-containing protein 65	-0.0360381	0.859775	-0.0359752	0.873418	0.120633	0.556694	0.81328	0.00631825	0.601762	0.0210127
409	Ssa#NM_001141440.1	Eukaryotic translation initiation factor 4E-1A-binding protein (4ebp)	0.519028	0.113223	0.652988	0.0258757	1.40207	0.000782338	1.38714	0.00164564	0.441269	0.218669
410	Ssa#NM_001141461.1	Ribosome biogenesis protein NSA2 homolog	0.322678	0.517521	1.08295	0.000287397	1.29161	0.000227578	1.36084	0.00039476	0.918899	0.00479725
411	Ssa#NM_001141467.2	Tubulin, alpha 1a	-0.340834	0.28165	-1.35053	0.000371215	-1.53689	0.00231252	-0.290545	0.511338	0.359231	0.281803
412	Ssa#NM_001141468.1	Sulfotransferase family cytosolic 2B member 1	0.936693	0.1958	0.840812	0.0576243	1.11612	0.0292366	0.829305	0.132875	0.373549	0.449571
413	Ssa#NM_001141472.1	Glutathione transferase omega-1	-0.732846	0.100944	-0.996337	0.0392724	-1.21402	0.0121819	-1.23638	0.0231679	-0.706317	0.165402
414	Ssa#NM_001141475.1	Ring finger protein 175	0.602624	0.120286	0.953978	0.000802419	0.917725	0.00302832	0.864648	0.00831967	0.710545	0.0180468
415	Ssa#NM_001141482.1	Leucine carboxyl methyltransferase 1	-0.489747	0.172334	0.126616	0.562162	0.146983	0.554	1.04452	0.0365754	1.05593	0.00755591
416	Ssa#NM_001141489.2	Glycerol-3-phosphate acyltransferase 3 [GPAT-3]	-0.701742	0.0578516	-1.32189	0.000845641	-2.00655	3.21799e-05	-2.13985	0.00019233	-1.36338	0.00127896
417	Ssa#NM_001141492.2	Glutathione S-transferase A	-0.198962	0.578633	-0.466944	0.213243	-0.267926	0.473655	-1.31326	0.016936	-1.06427	0.0603363
418	Ssa#NM_001141505.1	apoptosis-inducing, TAF9-like domain 1	-0.80234	0.00136631	-0.896377	0.000163983	-0.355369	0.151579	-0.666748	0.19907	0.0974537	0.746193
419	Ssa#NM_001141512.1	ATPase, Cu++ transporting, alpha polypeptide	0.752193	0.0590656	0.632658	0.014066	0.615267	0.0120221	1.01676	0.00295291	0.7079	0.0216601
420	Ssa#NM_001141523.1	Guanidinoacetate N-methyltransferase	0.908609	0.0332108	0.731377	0.0407222	0.558593	0.145767	0.263107	0.471461	-0.162479	0.630269
421	Ssa#NM_001141527.1	Transmembrane protein 126A	-0.732861	0.00597108	-0.962483	0.000618504	-0.993607	2.10562e-05	-0.340943	0.0558097	-0.146382	0.245503
422	Ssa#NM_001141529.1	Protein tyrosine phosphatase-like (Proline instead of catalytic arginine)_ member b	-1.42275	0.004189	-1.7792	0.000105561	-2.38268	5.05674e-06	-2.95733	4.51894e-06	-2.21278	4.30545e-05
423	Ssa#NM_001141534.1	Uroporphyrinogen-III synthase	0.218579	0.716419	0.676647	0.0794376	1.11393	0.0177848	0.351239	0.430019	0.462119	0.298377
424	Ssa#NM_001141539.1	BET1 homolog	-0.564202	0.116129	-1.46213	0.0164688	-0.84611	0.0183314	-0.97123	0.0138611	-0.456882	0.234108
425	Ssa#NM_001141540.1	DNA replication complex GINS protein SLD5	-1.31893	0.0482023	-0.467203	0.165385	-0.632519	0.174056	-0.331151	0.452518	0.209252	0.61774
426	Ssa#NM_001141545.1	Basophilic leukemia-expressed protein	0.180644	0.762436	-0.0157025	0.947502	0.414482	0.100536	0.983448	0.00130911	1.90815	3.02965e-05
427	Ssa#NM_001141558.1	Protein LZIC	0.320234	0.597693	0.806821	0.00232973	0.857707	0.00314985	1.22041	0.00165934	1.47839	0.000344697
428	Ssa#NM_001141561.2	Tetraspanin-6	0.63148	0.367128	0.983579	0.0203823	0.992082	0.0317392	0.975504	0.074922	1.12577	0.0383085
429	Ssa#NM_001141562.1	Coiled-coil-helix-coiled-coil-helix domain-containing protein 6	-0.384607	0.0984791	-0.646157	0.00273043	-0.833481	0.000205421	-1.13574	0.000598849	-0.560718	0.0226127
430	Ssa#NM_001141575.1	Josephin-2	-0.254097	0.491565	-0.647683	0.00515004	-0.896619	0.00318835	-0.629474	0.0212256	-0.258282	0.227464
431	Ssa#NM_001141576.1	pirin	-0.90528	0.190888	-1.22992	0.076448	-1.68872	0.0108303	-1.92168	0.0109908	-1.22297	0.0773134
432	Ssa#NM_001141587.1	RAD52 motif-containing protein 1	-0.552367	0.0292267	-0.488358	0.01371	-1.24128	0.000659973	-0.409275	0.0658655	-0.0819587	0.637917
433	Ssa#NM_001141588.1	Serine/threonine-protein phosphatase PGAM5, mitochondrial	0.187286	0.409125	0.629085	0.00545401	0.846228	0.000506725	0.397997	0.0464034	0.449325	0.0297287
434	Ssa#NM_001141597.1	Surfeit locus protein 1	0.438553	0.273966	0.462592	0.181462	0.651354	0.103298	0.677032	0.152401	1.04701	0.0368765
435	Ssa#NM_001141602.2	ATG4 autophagy related 4 homolog A (S. cerevisiae) (atg4a)	0.237617	0.459537	0.518898	0.111067	1.12459	0.00834328	1.01521	0.0186266	0.637809	0.0996222
436	Ssa#NM_001141610.1	basic leucine zipper transcription factor, ATF-like 3	0.617447	0.288965	0.854968	0.0873835	0.808668	0.127486	1.78932	0.0215436	1.68945	0.0161151
437	Ssa#NM_001141628.1	Zinc finger, AN1-type domain 5b	0.368166	0.050828	0.529444	0.0102615	1.02598	0.000246958	1.07856	0.000853365	0.354607	0.0674653
438	Ssa#NM_001141629.1	Serine incorporator 1	0.486307	0.0110948	0.59695	0.00410794	1.06725	2.00355e-05	0.529601	0.0106543	-0.038167	0.776444
439	Ssa#NM_001141638.1	Aurora kinase B	-0.806826	0.00737382	-0.708627	0.0104335	-0.43139	0.178623	-0.841839	0.0199568	-0.502878	0.0951784
440	Ssa#NM_001141646.1	Estradiol 17-beta-dehydrogenase 12-B	-0.404599	0.109859	-0.769483	0.00988564	-0.942948	0.00677634	-1.3247	0.00166583	-0.671133	0.0203081
441	Ssa#NM_001141649.1	SUMO-activating enzyme subunit 2	-0.96367	0.0019412	-0.789774	0.000395057	-1.04955	0.000124778	-0.414779	0.0903945	-0.471024	0.0549554
442	Ssa#NM_001141656.1	Cell death activator CIDE-B	1.00635	0.0418837	1.1955	0.00148424	1.56262	0.000596647	0.4948	0.170263	0.298556	0.439107
443	Ssa#NM_001141660.1	Thymocyte nuclear protein 1	-0.647915	0.0927678	-0.501362	0.123826	-1.21611	0.0163498	0.125549	0.735418	0.639615	0.114811
444	Ssa#NM_001141682.1	probable Bax inhibitor 1	0.546802	0.360779	0.960511	0.0205482	0.994851	0.036618	1.29309	0.0279219	1.88413	0.00338909
445	Ssa#NM_001141688.1	Protein phosphatase 1, catalytic subunit, alpha isoform a	-0.646258	0.0877303	-1.08445	3.70603e-06	-0.962278	4.2897e-05	-0.905414	0.000175206	-0.863287	0.00110388
446	Ssa#NM_001141692.1	Adenosine kinase a	0.340822	0.509882	1.26344	0.000409006	1.04654	0.00555138	0.45202	0.153804	0.65881	0.0689889
447	Ssa#NM_001141701.1	General transcription factor IIH subunit 2	-1.3011	4.52434e-05	-0.565614	0.00299247	-0.84475	0.000921258	-0.265275	0.170382	-0.243028	0.304583
448	Ssa#NM_001141708.1	Pleckstrin homology domain-containing family B member 2	0.447675	0.237677	0.479062	0.121464	0.862824	0.0217107	0.590975	0.134365	0.488114	0.208707
449	Ssa#NM_001141714.1	Beta-Ala-His dipeptidase	-1.18504	0.0369439	-2.20629	2.18574e-07	-2.06613	0.000310442	-1.83469	0.00181336	-2.17109	2.54828e-05
450	Ssa#NM_001141717.1	Serine protease HTRA1	0.19218	0.792703	0.97244	0.0600482	1.11236	0.0759545	1.57614	0.0280017	1.10174	0.0946532
451	Ssa#NM_001141720.1	P53 apoptosis effector related to PMP-22	-0.00157434	0.995436	-0.553415	0.0195083	-0.249097	0.324769	-0.771822	0.030695	-0.808502	0.00907963
452	Ssa#NM_001141724.1	Glucose-6-phosphate 1-dehydrogenase	-1.83867	0.000761325	-1.56595	0.00161064	-2.82908	3.67384e-05	-2.32036	0.000537251	-1.02347	0.00747705
453	Ssa#NM_001141729.1	Carboxypeptidase N catalytic chain	0.131038	0.657838	0.312543	0.246103	0.279738	0.388448	1.17966	0.0075154	0.989461	0.0198712
454	Ssa#NM_001141734.1	Cell division protein kinase 2	-1.09077	0.000204209	-0.614606	0.0104465	-0.927476	0.00586656	-0.668284	0.041846	0.0594679	0.771828
455	Ssa#NM_001141736.1	Stomatin-like protein 2, mitochondrial	-1.10794	0.00210456	-0.937226	0.0299692	-1.49495	3.2825e-05	-0.277017	0.361789	0.345214	0.151468
456	Ssa#NM_001141737.1	Pseudouridylate synthase 7 homolog	0.509193	0.25462	0.883031	0.00625484	0.591368	0.0575684	0.933724	0.0188004	0.306316	0.315464
457	Ssa#NM_001141738.1	Pyridine nucleotide-disulfide oxidoreductase domain-containing protein 2	-0.0238876	0.905367	0.59258	0.000332752	0.533671	0.0150274	1.21868	0.00015851	0.827496	0.000150233
458	Ssa#NM_001141739.1	Aspartate aminotransferase, cytoplasmic	-0.426412	0.270611	-1.17321	0.0019161	-0.958856	0.0232951	-2.02328	0.000550158	-1.12627	0.0219788
459	Ssa#NM_001141742.1	Bardet-Biedl syndrome 2 protein	0.276518	0.590668	0.780242	0.00769644	1.05699	0.00327441	0.837404	0.0270217	0.81813	0.0323124
460	Ssa#NM_001141743.1	Peroxisomal 3,2-trans-enoyl-CoA isomerase	1.3435	0.0230099	1.37143	0.000285247	1.50802	0.00049051	1.25299	0.00871933	1.17582	0.0120818
461	Ssa#NM_001141748.1	Mannose-1-phosphate guanyltransferase alpha	-0.752322	0.0152201	-0.716111	0.0063016	-0.943039	0.00264753	-0.642975	0.0497617	-0.324874	0.275583
462	Ssa#NM_001141750.1	Probable rRNA-processing protein EBP2	0.323927	0.295358	0.784775	0.0393516	0.771346	0.0622185	1.28146	0.0123719	1.29234	0.00710971
463	Ssa#NM_001141757.1	Cytoplasmic dynein 1 intermediate chain 2	-0.568667	0.0565171	-0.951458	0.00033896	-1.17734	7.44843e-05	-1.12706	0.00211266	-0.74311	0.00455385
464	Ssa#NM_001141767.1	Xaa-Pro aminopeptidase 1	-0.463922	0.178949	-1.01391	0.000880385	-1.79349	0.000157774	-1.65768	0.00144843	-1.09525	0.00906685
465	Ssa#NM_001141775.1	Interferon regulatory factor 2 binding protein 2a	-0.642561	0.241065	-1.8514	0.00394292	-1.09146	0.0177645	-0.856429	0.0717331	-0.740657	0.119035
466	Ssa#NM_001141777.1	ectonucleotide pyrophosphatase/phosphodiesterase 4	-0.644847	0.00509656	-0.677081	7.60048e-05	-0.35386	0.0203522	-1.07019	1.15856e-05	-1.17891	0.000209076
467	Ssa#NM_001141784.1	Guanine nucleotide binding protein	0.421592	0.48877	0.876533	0.00939301	0.680951	0.0567837	0.905395	0.0391646	1.16563	0.00965384
468	Ssa#NM_001141785.1	Replication protein A 70 kDa DNA-binding subunit	-0.501777	0.0571673	-0.398985	0.055967	-1.27866	0.00028719	-0.579441	0.0633608	-0.113285	0.546649
469	Ssa#NM_001141787.1	Lamina-associated polypeptide 2 isoform beta	-0.770554	0.00299785	-0.744669	0.00108405	-1.00736	0.000251047	-0.683612	0.00800547	-0.419048	0.0664191
470	Ssa#NM_001141791.1	Galectin-3-binding protein	-0.188873	0.40646	-0.375304	0.0725512	-0.870947	0.00879919	-0.589814	0.0127255	-0.320829	0.256764
471	Ssa#NM_001141807.1	Rho-related GTP-binding protein RhoB	-0.301532	0.53955	0.492307	0.0950925	0.874143	0.00387587	1.20704	0.0011096	0.74575	0.021451
472	Ssa#NM_001141828.1	Gastrulation-specific protein G12	-0.982401	0.00149486	-0.460457	0.0368211	-0.965576	0.00220449	-0.80502	0.101601	1.06268	0.113651
473	Ssa#NM_001141836.1	proenkephalin	-0.59039	0.286598	-0.333867	0.246606	-1.07264	0.00196286	0.144065	0.589189	0.723741	0.0400939
474	Ssa#NM_001141838.1	DnaJ	0.529052	0.014971	0.474557	0.00751906	0.894477	0.000761312	0.806605	0.00291914	0.532601	0.0261956
475	Ssa#NM_001141852.1	Pterin-4-alpha-carbinolamine dehydratase 2 (phs2)	-0.198872	0.309583	-0.751244	0.000187394	-0.841317	0.00151762	-0.0536174	0.728208	-0.181689	0.296981
476	Ssa#NM_001141853.1	Epithelial membrane protein 3	0.495852	0.0456815	-0.556385	0.00484797	-0.542855	0.0181025	-0.878125	0.00437486	-0.510948	0.0456563
477	Ssa#NM_001141865.1	Folate receptor alpha	0.97902	0.238798	1.0664	0.165294	1.41142	0.103719	2.57857	0.0232221	1.88903	0.0642777
478	Ssa#NM_001141867.1	G-rich sequence factor 1	0.0804219	0.804804	0.588444	0.0593277	0.70609	0.0619226	1.11181	0.0142915	1.03093	0.0185528
479	Ssa#NM_001141874.1	N6-adenine-specific DNA methyltransferase 2 (n6mt2)	0.219672	0.249611	0.489576	0.0014756	0.747094	0.00272112	0.979389	0.000106908	0.780206	0.000296736
480	Ssa#NM_001141884.1	phosphatidylinositol glycan, class P	0.413775	0.140461	0.640393	0.000258248	0.50893	0.00175611	0.729807	0.00714123	0.836617	0.00038365
481	Ssa#NM_001141888.1	26S proteasome non-ATPase regulatory subunit 14	-0.618337	0.116999	-0.702696	0.00867224	-0.824107	0.00478526	-0.815414	0.0115752	-0.677825	0.0225773
482	Ssa#NM_001141905.2	Ribulose-phosphate 3-epimerase	-0.0543148	0.870063	0.116884	0.554403	0.12485	0.548333	0.766348	0.0259747	1.27514	0.00183404
483	Ssa#NM_001141906.1	Mediator complex subunit 21	-0.460703	0.0148463	-0.387399	0.00472233	-0.845451	0.000944022	-0.0342064	0.721516	0.119053	0.308842
484	Ssa#NM_001141909.1	Elongation factor 1-alpha, oocyte form	0.976389	0.173519	1.15203	0.0150702	0.315761	0.542948	0.560696	0.244578	0.268995	0.645033
485	Ssa#NM_001141911.1	calcium binding and coiled-coil domain 2-like	0.537175	0.0133708	0.694838	0.000119653	1.02203	0.000157097	0.698294	0.00402498	-0.141147	0.24124
486	Ssa#NM_001141914.1	P3 protein	1.20538	0.0110407	1.84662	6.41105e-05	2.06989	0.000155506	1.96491	0.000681895	0.960313	0.0385626
487	Ssa#NM_001142707.1	Ornithine decarboxylase antizyme 1b	0.309699	0.586792	1.20326	0.0143529	1.14379	0.0293342	0.788198	0.157769	0.858081	0.130136
488	Ssa#NM_001142716.1	Aldehyde dehydrogenase 6 family, member A1	0.437525	0.486529	1.00097	0.00671005	0.739497	0.0526334	0.377553	0.319474	0.775087	0.0613203
489	Ssa#NM_001145421.1	Oxysterols receptor LXR-alpha	-0.0232633	0.963638	0.829418	0.00220428	0.964914	0.000541586	0.410538	0.0680859	0.047128	0.824899
490	Ssa#NM_001145422.1	Neutrophil cytosolic factor 1	0.44263	0.257261	-0.11041	0.494121	-0.517574	0.0466973	0.542976	0.151763	1.01268	0.022919
491	Ssa#NM_001145424.1	Stat1 alpha/beta	0.58985	0.070497	0.921598	0.000759074	1.29821	0.000267283	0.88486	0.00408095	0.572126	0.0299048
492	Ssa#NM_001146354.1	neutrophil cytosolic factor 4	0.854567	0.218883	1.45886	0.000117427	1.03161	0.0167822	-0.00362627	0.99358	-0.351477	0.264169
493	Ssa#NM_001146379.1	Thioredoxin domain-containing protein 12	0.305296	0.185579	0.40182	0.0116363	0.906259	0.000373743	0.936741	0.000449293	0.400988	0.0113193
494	Ssa#NM_001146382.1	COMM domain-containing protein 10	0.499289	0.464392	1.33252	0.00108204	1.25258	0.00341396	1.26082	0.00834267	1.02782	0.0198823
495	Ssa#NM_001146385.1	Calponin 3, acidic a	-0.899969	0.117935	-1.12449	8.3622e-05	-1.10436	0.00011406	-1.20429	0.0101678	-1.44813	0.000216451
496	Ssa#NM_001146396.1	Syndecan 2	0.334684	0.588673	0.897916	0.0300687	1.08703	0.0236377	0.316315	0.511936	-0.16519	0.722511
497	Ssa#NM_001146402.1	insulin-like growth factor II	2.01066	0.056244	2.53309	0.0129402	1.96175	0.0627772	0.150285	0.883437	1.24992	0.246766
498	Ssa#NM_001146407.1	SET translocation	0.0608516	0.875635	0.767653	0.0225645	0.50534	0.129401	0.822691	0.051588	1.05085	0.0186579
499	Ssa#NM_001146410.1	Probable D-tyrosyl-tRNATyr deacylase 2	0.0660201	0.778701	-0.141	0.354982	-0.341209	0.0530318	0.803995	0.0031927	1.35475	0.000122571
500	Ssa#NM_001146411.1	Low density lipoprotein receptor adapter protein 1	0.507531	0.508999	1.54272	0.0161245	1.52811	0.0246291	1.05809	0.125996	1.01951	0.132278
501	Ssa#NM_001146413.2	Lysozyme g	0.933607	0.0128881	0.486759	0.0633638	0.687124	0.0144806	0.611487	0.10419	0.664719	0.0549337
502	Ssa#NM_001146414.1	Src kinase-associated phosphoprotein 2	0.208431	0.240708	0.47529	0.0307238	0.269236	0.10052	-0.0112158	0.96379	0.812931	0.0014957
503	Ssa#NM_001146418.1	Ribosomal biogenesis protein LAS1L	-0.52361	0.032481	-0.365387	0.0546057	-0.807331	0.020292	-0.426849	0.14729	0.191322	0.328342
504	Ssa#NM_001146420.1	Small proline-rich protein 2H	-0.558519	0.0417405	-0.555969	0.0218091	-0.895371	0.00419066	-1.09244	0.00726829	-0.643178	0.0648045
505	Ssa#NM_001146422.1	Polyglutamine-binding protein 1	0.391504	0.288112	0.550502	0.0331755	0.390296	0.108157	0.435443	0.175069	0.85075	0.00852186
506	Ssa#NM_001146428.1	Spermatogenesis-associated serine-rich protein 2	0.250462	0.662846	0.979877	0.000372256	0.749504	0.015633	0.114884	0.695888	-0.163309	0.448247
507	Ssa#NM_001146436.1	Neuroblastoma suppressor of tumorigenicity 1	2.50706	0.0252121	2.38833	0.0113552	2.68064	0.0139847	1.76359	0.119833	-0.523341	0.685665
508	Ssa#NM_001146447.1	Centrin-3	-1.09938	0.00131189	-0.827138	0.000990114	-0.791286	0.00824035	-0.156229	0.609827	0.285778	0.164987
509	Ssa#NM_001146451.1	Dynactin subunit 5	-0.241788	0.586154	-0.729039	0.00244587	-0.521386	0.016517	-0.495063	0.0538194	-0.830943	0.0109764
510	Ssa#NM_001146461.1	CH055 protein	-0.0722686	0.863177	0.283846	0.44073	0.476667	0.290416	0.776102	0.127241	1.23255	0.0253796
511	Ssa#NM_001146468.1	Ras-related GTP binding C	-0.884231	0.00163142	-0.607516	0.00514128	-0.627472	0.00973329	-0.500418	0.00573046	-0.554138	0.00250197
512	Ssa#NM_001146471.1	centromere protein H	-1.08504	0.000880765	-0.868027	0.00126286	-0.398383	0.239594	-0.46259	0.277238	0.291907	0.274615
513	Ssa#NM_001146473.1	Heat shock protein 90, alpha	0.747365	0.0467891	1.021	0.00111759	0.953421	0.00420639	1.19219	0.00318137	0.929853	0.00918364
514	Ssa#NM_001146475.1	CL012 protein	0.625173	0.109014	-1.03159	0.00362499	0.0453183	0.808006	-1.44104	0.0096272	-0.890877	0.0222453
515	Ssa#NM_001146479.1	Actin related protein 2/3 complex_ subunit 1A	0.605552	0.273939	1.12215	0.00506559	1.10158	0.00954292	0.636015	0.166645	0.916611	0.0570528
516	Ssa#NM_001146488.1	Ferritin, heavy subunit	-0.236834	0.422552	0.659935	0.00106136	0.765491	0.000851679	0.947918	0.000352744	0.555119	0.00646996
517	Ssa#NM_001146499.1	Protein DJ-1	-0.118126	0.435873	-0.726376	0.0004116	-1.23106	3.28735e-07	-0.71689	0.00105824	-0.336521	0.0656499
518	Ssa#NM_001146501.1	CG047 protein	-0.978766	0.0760201	-1.6187	0.000142054	-1.63544	0.000984287	-1.78454	0.00122461	-1.65342	0.00155013
519	Ssa#NM_001146508.1	DNA-directed RNA polymerase III subunit RPC7-like	0.777455	0.0788914	0.54643	0.0157906	1.11233	0.000976892	1.3695	0.00133206	0.737591	0.0293682
520	Ssa#NM_001146516.1	DNA replication complex GINS protein PSF1	-0.906684	0.00312492	-0.52363	0.0104624	-1.07133	0.00751115	-0.21377	0.469206	0.339362	0.160778
521	Ssa#NM_001146521.1	Mortality factor 4 like 1	0.160552	0.582935	0.481579	0.0661973	0.599306	0.0495784	0.849817	0.0254549	0.480801	0.13855
522	Ssa#NM_001146524.1	ubiquitin-fold modifier 1	-0.206156	0.295326	-0.205155	0.234429	-0.95303	0.00827854	-0.418976	0.0744867	-0.537308	0.125459
523	Ssa#NM_001146530.1	Tp53rk binding protein	-0.282629	0.322157	0.147613	0.284809	0.223589	0.141641	0.882035	0.000554514	1.094	0.000194888
524	Ssa#NM_001146534.1	CL043 protein	-0.298343	0.304805	0.374986	0.0760504	0.184908	0.393547	0.727826	0.0170189	0.98959	0.00470793
525	Ssa#NM_001146537.1	Tubulin polyglutamylase complex subunit 2	0.020374	0.905668	0.557567	0.0109179	0.430438	0.0454466	0.989071	0.00183532	0.976025	0.000661738
526	Ssa#NM_001146546.1	Cathepsin L1	0.519214	0.0804449	1.04091	9.99497e-05	1.42522	0.00121782	1.10681	0.0036573	0.48571	0.0403651
527	Ssa#NM_001146554.1	Pterin-4-alpha-carbinolamine dehydratase 2	-0.097027	0.73298	0.856116	0.00521737	0.773102	0.0183083	1.06786	0.00813073	0.972135	0.0153103
528	Ssa#NM_001146560.1	CTAGE family, member 5, isoform CRA_j; Cutaneous T	0.799014	0.189595	1.41725	9.00274e-08	1.17493	0.00131803	0.629446	0.00796847	0.400325	0.0256951
529	Ssa#NM_001146563.1	trophoblast glycoprotein	0.99351	0.0511163	1.67332	0.00016952	1.56734	0.00282255	1.12461	0.0024507	1.12326	0.00420002
530	Ssa#NM_001146564.1	MARVEL domain-containing protein 3	-0.921003	0.00268206	-0.809486	0.00899069	-1.11081	0.000481338	-0.963329	0.00457096	-0.771725	0.0130872
531	Ssa#NM_001146565.1	Serum amyloid A5	1.12379	0.297962	-0.903135	0.184845	-1.9648	0.0157769	-2.21998	0.0192775	-1.35357	0.13053
532	Ssa#NM_001146570.1	Ubiquitin-conjugating enzyme E2 T	-0.928437	0.0149607	-1.09272	0.00199976	-0.376306	0.338526	-1.35152	0.0796696	-0.573351	0.095355
533	Ssa#NM_001146575.1	Astrocytic phosphoprotein PEA-15	-1.58107	0.0789173	-2.71245	5.86924e-06	-2.75263	2.33947e-05	-2.84782	7.52051e-05	-2.94845	6.41476e-05
534	Ssa#NM_001146593.1	Cytidine deaminase	-0.0584666	0.852837	-1.38534	0.000474759	-1.74883	0.000253472	-3.05877	0.000170677	-1.37693	0.002519
535	Ssa#NM_001146595.1	metalloprotease C21orf57	-1.00871	0.000577301	-0.17858	0.160108	-0.0832486	0.570364	-0.0362888	0.808005	0.00514645	0.980514
536	Ssa#NM_001146601.1	Vacuolar ATP synthase subunit e 2	0.810169	0.10663	1.33692	0.000160337	1.10008	0.00394683	0.744453	0.0476013	0.4719	0.129349
537	Ssa#NM_001146607.1	DGCR6 protein	0.927662	0.232846	0.750047	2.70187e-05	0.938624	5.86972e-06	1.10891	4.52279e-05	0.780718	0.000166601
538	Ssa#NM_001146616.1	Centromere protein M	-0.005761	0.990393	1.1758	0.000310332	0.946704	0.0069355	1.11917	0.00242282	1.00421	0.00906215
539	Ssa#NM_001146618.1	Eukaryotic translation initiation factor 4E	-0.31535	0.401056	0.528099	0.0875069	0.100877	0.730997	0.566498	0.273141	1.04804	0.0189028
540	Ssa#NM_001146619.1	Clathrin light chain B	-0.382307	0.0246519	-0.612256	0.000935099	-1.03048	0.000946955	-0.857318	0.000676283	-0.640652	0.00122243
541	Ssa#NM_001146623.1	Lin-7 homolog B	0.384941	0.457098	0.994045	0.0131959	0.945404	0.0225531	1.0667	0.0237367	0.849179	0.0562315
542	Ssa#NM_001146626.1	RAN binding protein 9	0.154133	0.681077	0.49996	0.161935	0.646399	0.144633	0.954538	0.0440451	0.525198	0.200323
543	Ssa#NM_001146632.1	Vesicle transport protein GOT1A	-0.295307	0.358043	-0.44258	0.0452603	-0.655063	0.00760489	-0.939554	0.0286704	-0.17461	0.345806
544	Ssa#NM_001146637.1	RAB33B, member RAS oncogene family a	0.183377	0.497961	0.569744	0.00234228	0.496586	0.015515	1.08419	0.000584343	0.871952	0.0121265
545	Ssa#NM_001146638.1	Gap junction beta-5 protein	0.645651	0.362701	1.80295	6.37992e-06	1.80772	3.83593e-05	1.50431	0.000589571	0.81359	0.00778575
546	Ssa#NM_001146645.1	ADP-ribosylation factor-like protein 6-interacting protein 1	-1.06272	0.0130719	-0.244369	0.210327	-0.0573994	0.793067	-0.207869	0.286949	-0.00630231	0.969853
547	Ssa#NM_001146647.1	MARCKS-related protein	0.0848908	0.822289	-0.611906	0.0327218	-0.800036	0.0122212	-0.950637	0.018914	-1.29043	0.00199946
548	Ssa#NM_001146652.1	DNA-directed RNA polymerases I, II, and III subunit RPABC3	0.390042	0.21401	1.00033	0.0010697	0.565008	0.0585309	0.326533	0.319858	0.0528262	0.81926
549	Ssa#NM_001146655.1	Ubiquitin-fold modifier-conjugating enzyme 1	0.274495	0.498681	0.454849	0.000630575	0.602647	0.00042116	0.813028	0.000120426	0.78242	0.000679371
550	Ssa#NM_001146667.1	spindle and kinetochore associated complex subunit 1	-1.0014	0.00876022	-0.786633	0.0152007	0.165148	0.624576	-0.849155	0.0785655	-0.577907	0.111802
551	Ssa#NM_001146670.1	Lipoma HMGIC fusion partner-like 4 protein	1.15433	0.0886593	1.89528	0.000341462	1.38964	0.00960638	0.711149	0.236228	0.0476028	0.899661
552	Ssa#NM_001146674.1	Jun dimerization protein 2	-0.415711	0.16865	-0.736206	0.00906316	-0.863152	0.00507857	-0.844259	0.0313959	-0.726241	0.01944
553	Ssa#NM_001146676.1	Dual specificity phosphatase 7	0.594744	0.420329	-0.0369442	0.907251	0.580551	0.102015	-1.15102	0.0179815	-0.581009	0.166674
554	Ssa#NM_001159373.1	leukolectin protein	1.28613	0.0778308	1.62541	0.00225349	0.133085	0.708951	0.471048	0.308338	0.5235	0.193001
555	Ssa#NM_001163081.1	hatching enzyme	0.536643	0.164053	1.29812	0.000783687	1.34908	0.00238564	0.178246	0.644671	0.247494	0.50857
556	Ssa#NM_001164765.1	leptin receptor	1.08581	0.0684621	1.38465	5.6112e-06	1.21749	0.000109921	1.23791	1.51448e-05	0.847894	0.000678233
557	Ssa#NM_001165263.1	pituitary tumor-transforming 1	-0.651324	0.00394328	-0.358267	0.0598602	0.812158	0.0012546	-0.29837	0.526209	0.337101	0.309442
558	Ssa#NM_001165266.1	angiopoietin-related protein 7-like (LOC106608036)	0.106544	0.76302	-0.724576	0.00896416	-0.869286	0.00811902	-0.462521	0.255075	-0.222111	0.533187
559	Ssa#NM_001165267.1	fucU homolog	-0.271408	0.337157	-0.805928	0.00030962	-0.309074	0.0729045	0.228593	0.18392	0.390133	0.0473485
560	Ssa#NM_001165272.1	Beta-2-glycoprotein 1	0.391912	0.556214	0.542528	0.103684	0.991782	0.00971026	0.776757	0.045468	0.780779	0.0166691
561	Ssa#NM_001165274.1	methyltransferase WBSCR22	0.0697929	0.929865	1.047	0.017027	1.13298	0.0236005	1.24611	0.0261879	1.36639	0.0176524
562	Ssa#NM_001165283.1	Rho-related GTP-binding protein RhoQ	-0.49473	0.0639206	-0.409436	0.0103686	-0.802484	0.00901625	-0.842018	0.00191421	-0.970401	2.22205e-05
563	Ssa#NM_001165301.1	Adenosine kinase	-0.632722	0.166597	-0.406839	0.309129	-1.37343	0.0140197	-0.745105	0.166873	-0.137447	0.777237
564	Ssa#NM_001165305.1	Solute carrier family 38, member 5b	-0.193809	0.637331	-0.520344	0.179216	-0.893803	0.0621602	0.743524	0.22826	1.41535	0.0267144
565	Ssa#NM_001165307.1	Intercellular adhesion molecule 2	-1.34715	0.0195687	-0.376744	0.226123	-0.906116	0.000700552	0.0169922	0.93629	0.143131	0.537018
566	Ssa#NM_001165311.1	Heterogeneous nuclear ribonucleoprotein G	-0.736578	0.00297168	-0.729158	0.00372479	-1.50019	5.35282e-07	-0.360175	0.17108	-0.0434093	0.790055
567	Ssa#NM_001165312.1	Thromboxane-A synthase	0.313495	0.525032	1.07319	0.00175307	1.51693	0.000657473	1.3748	0.00288176	0.953818	0.0165652
568	Ssa#NM_001165314.1	Regulator of calcineurin 1a	1.11816	0.000749544	0.386254	0.0859717	0.189199	0.331901	-0.0490603	0.834292	0.5315	0.0274762
569	Ssa#NM_001165322.1	Band 4.1-like protein 4	0.396644	0.278059	1.13084	0.0148533	0.954746	0.0459095	0.0282221	0.941631	0.267203	0.302241
570	Ssa#NM_001165328.1	Spindlin-1	0.445579	0.275107	0.434972	0.111141	0.239609	0.409725	0.523483	0.128401	0.92735	0.0153622
571	Ssa#NM_001165343.1	Leucyl-tRNA synthetase b	0.413139	0.405955	1.0789	0.00591771	1.00722	0.0131087	1.9837	0.00339047	2.21704	0.000483798
572	Ssa#NM_001165344.1	S-adenosylmethionine decarboxylase proenzyme	-1.15102	0.00723064	-0.581694	0.00594733	-0.741975	0.00185892	-0.519271	0.0627256	-0.50093	0.0660286
573	Ssa#NM_001165346.1	Egl nine homolog 2	-0.0416734	0.891803	1.04245	0.00186601	0.849541	0.0202583	1.4897	8.15809e-05	0.502382	0.0433878
574	Ssa#NM_001165355.1	nuclear receptor coactivator 4	0.0838996	0.771642	-1.01437	0.0118522	-0.365335	0.144864	-0.496909	0.0905251	-0.900247	0.0139177
575	Ssa#NM_001165366.1	Protein MEMO1	-0.254901	0.172804	-0.316753	0.0295244	-0.146933	0.173471	-0.530398	0.00357602	-0.800539	0.000362576
576	Ssa#NM_001165367.1	Dual specificity phosphatase 7	0.522735	0.269966	0.870207	0.00712525	1.2361	0.00271555	0.723514	0.0374874	0.489247	0.096532
577	Ssa#NM_001165368.1	C-1-tetrahydrofolate synthase, cytoplasmic	0.0826452	0.577098	0.389627	0.000572618	0.355163	0.00481859	0.777029	0.00574931	2.23727	8.98787e-05
578	Ssa#NM_001165371.1	StAR-related lipid transfer protein 5	-0.58269	0.0197907	-0.562283	0.0152628	-0.904266	0.00180219	-0.551129	0.050421	-0.410565	0.201829
579	Ssa#NM_001165373.1	Coiled-coil domain-containing protein 22	0.432096	0.229385	0.408903	0.433476	0.927644	0.0101084	0.724472	0.04583	0.556558	0.138995
580	Ssa#NM_001165374.1	Intercellular adhesion molecule 2	0.31734	0.421593	1.11908	0.00337687	1.29944	0.00287457	0.94222	0.0345385	0.79005	0.0602753
581	Ssa#NM_001165375.1	Family with sequence similarity 3, member C	0.138251	0.578512	0.581586	0.0256083	0.104397	0.72243	0.430033	0.102536	1.30501	0.00564354
582	Ssa#NM_001165407.1	Translocating chain-associating membrane protein	-0.365629	0.0747076	-0.395441	0.0320492	-0.334736	0.112605	-0.803719	0.00298304	-0.464107	0.104692
583	Ssa#NM_001165410.1	2 ,3 -cyclic-nucleotide 3 -phosphodiesterase	0.409571	0.495192	0.364348	0.165729	0.164366	0.489925	1.84096	0.014558	2.60841	3.393e-05
584	Ssa#NM_001171850.1	interferon regulatory factor 7B	0.510345	0.223212	1.09324	4.77721e-05	0.8095	0.00991146	0.597395	0.0508421	0.499592	0.0193613
585	Ssa#NM_001173562.1	Decorin	-0.0754606	0.844455	-1.16466	0.00255875	-1.27439	0.00581538	-1.7155	0.0006062	-1.39347	0.00420915
586	Ssa#NM_001173565.1	Cell cycle progression protein 1	0.466072	0.547943	0.941814	0.0479796	1.24339	0.0260119	0.929482	0.120106	0.498194	0.366693
587	Ssa#NM_001173575.1	complement component C6	0.527618	0.521814	1.14487	0.0266283	1.25214	0.0306564	1.2781	0.0380485	1.17116	0.0674029
588	Ssa#NM_001173578.1	Serine/threonine-protein phosphatase 4 regulatory subunit 3A	0.255846	0.624817	1.22967	0.000527907	1.21644	0.00121879	0.976238	0.0119612	1.02438	0.00815464
589	Ssa#NM_001173579.1	Condensin complex subunit 3	-0.926106	0.0193036	-0.737817	0.0392301	0.0918669	0.785332	-0.852466	0.125181	-0.264245	0.432894
590	Ssa#NM_001173581.1	Ecto-NOX disulfide-thiol exchanger 1	0.632148	0.0957572	1.38261	9.48047e-06	1.26774	0.000348391	1.03541	0.000140156	1.24419	0.000146041
591	Ssa#NM_001173585.1	Periodic tryptophan protein 2 homolog	-0.412881	0.0896628	0.51071	0.0877612	0.298377	0.266732	0.925713	0.0145929	1.26913	0.00114712
592	Ssa#NM_001173586.1	Chloride channel 3	0.192837	0.708642	1.29578	0.00208642	1.41591	0.00164644	1.56335	0.00222318	1.73486	0.00135941
593	Ssa#NM_001173596.1	Cysteine-rich secretory protein LCCL domain containing 1b	0.904752	0.0226499	1.0525	1.39858e-05	1.234	0.000887989	0.382093	0.194985	-0.184263	0.108865
594	Ssa#NM_001173598.1	TNF receptor-associated factor 4	0.554166	0.09884	0.495065	0.0498971	0.81614	0.00888155	0.642357	0.0790846	0.374256	0.163316
595	Ssa#NM_001173606.1	phosphatidylserine decarboxylase	0.463734	0.175395	-1.38835	0.00759583	-2.55343	0.000245039	-1.93119	0.000271692	-1.73108	0.00251
596	Ssa#NM_001173609.1	Protein phosphatase 2	-1.50984	0.00355191	-0.744937	0.00558383	-1.34078	1.4475e-06	-0.661363	0.0087341	-0.489818	0.0879856
597	Ssa#NM_001173612.1	Peptide-N4-N-acetyl-beta-D-glucosaminylasparagine amidase F	-0.217668	0.24802	-0.871268	0.000297724	-0.676427	0.000848718	-0.265139	0.213146	-0.374127	0.0700075
598	Ssa#NM_001173614.1	Serine/threonine kinase 3	-0.00140888	0.995514	0.824548	0.000713885	0.641663	0.00409326	0.484428	0.0226251	0.564184	0.0084869
599	Ssa#NM_001173626.1	DNA replication licensing factor MCM2	-1.22118	0.0177544	-0.316386	0.41007	-2.05873	0.000520139	-0.138322	0.510351	0.115044	0.569
600	Ssa#NM_001173631.1	Transcriptional regulator Myc-2	1.4749	0.0504397	3.71811	1.44618e-06	3.18067	5.13501e-06	3.55682	2.09095e-05	2.5118	8.32283e-05
601	Ssa#NM_001173636.1	Bardet-Biedl syndrome 7 protein	0.618502	0.17952	0.88972	0.00418457	0.811752	0.00179856	0.432084	0.0900506	0.200366	0.157922
602	Ssa#NM_001173645.1	Coagulation factor XIII, A1 polypeptide b	-0.280725	0.0394365	-0.825995	0.000850014	-0.592393	0.000201242	-0.250836	0.155371	-0.230872	0.315007
603	Ssa#NM_001173646.1	Pyridoxal phosphate phosphatase	-0.493339	0.000984459	-0.677164	2.24678e-05	-0.655861	0.000103812	-0.990879	0.000180252	-0.460043	0.00500059
604	Ssa#NM_001173656.1	MARVEL domain containing 2a	0.17567	0.4851	0.672131	0.00126145	0.802272	0.00108305	0.571833	0.0186115	0.45038	0.051414
605	Ssa#NM_001173658.1	Tyrosine 3-monooxygenase/tryptophan 5-monooxygenase activation protein, eta polypeptide	-0.169947	0.15196	-0.219794	0.0397067	-0.206254	0.0798409	1.15879	0.077119	2.1936	0.000170236
606	Ssa#NM_001173661.1	Extracellular matrix protein 1	0.454948	0.0224632	-0.206614	0.17153	-0.278903	0.0647859	-1.22577	0.000139856	-0.593024	0.00442966
607	Ssa#NM_001173662.1	acyl-CoA thioesterase 8	-1.38169	0.00113868	-1.4355	5.61629e-05	-1.41218	0.000320631	-0.959513	0.0133142	-0.916756	0.00546833
608	Ssa#NM_001173665.1	Alpha-galactosidase A (agal)	0.294379	0.347238	0.453008	0.0664633	0.629053	0.0283591	1.39388	0.00223053	1.77242	0.000349971
609	Ssa#NM_001173668.1	Eukaryotic translation initiation factor 2 subunit 3	0.462731	0.166347	0.76727	0.00303852	0.599185	0.149589	1.15033	0.00119455	1.13806	0.00169093
610	Ssa#NM_001173669.1	Major vault protein	-0.659985	0.0318827	-0.534729	0.0349117	-0.574689	0.0330061	-1.25159	0.000600693	-0.724515	0.0395558
611	Ssa#NM_001173670.1	Signal transduction and activation of transcription 1a	0.923094	0.0106858	0.683904	0.00223591	0.864152	0.00206048	0.327723	0.253818	0.0916708	0.700645
612	Ssa#NM_001173675.1	Transmembrane protein 149	0.870058	0.0265905	0.693449	0.0166167	0.931441	0.0122995	0.240786	0.40857	0.218794	0.505521
613	Ssa#NM_001173680.1	ATPase family AAA domain-containing protein 3	-1.779	0.0243603	-0.484721	0.261587	-1.00976	0.00467446	0.63294	0.221987	0.829509	0.0738941
614	Ssa#NM_001173684.1	Vacuolar protein sorting-associated protein 37A	0.828666	0.0231688	0.597093	0.0447678	0.819953	0.0130384	0.290733	0.403938	0.348233	0.317049
615	Ssa#NM_001173685.1	Ras association	0.756292	0.0720107	0.573821	0.0351651	0.188485	0.462321	0.873188	0.0336985	0.180585	0.504222
616	Ssa#NM_001173687.1	DENN domain-containing protein 2A	0.740545	0.15243	0.873139	0.00664115	0.761061	0.0356205	0.281627	0.386495	0.360045	0.369961
617	Ssa#NM_001173688.1	Polypeptide N-acetylgalactosaminyltransferase 2	-0.421858	0.384479	0.856539	0.00129501	0.806681	0.00515777	0.489081	0.0555006	0.161518	0.445318
618	Ssa#NM_001173689.1	Acyl-CoA synthetase long-chain family member 4a	-0.604738	0.0227375	0.0507567	0.812168	-0.0652663	0.798787	-0.942049	0.00332597	-0.819425	0.00679859
619	Ssa#NM_001173696.1	Epsin-1	0.546132	0.279923	0.802597	0.00971532	0.503611	0.167498	0.384343	0.251701	0.485936	0.152247
620	Ssa#NM_001173705.1	Protein tyrosine phosphatase, receptor type, N polypeptide 2	1.00042	0.236253	0.874361	0.0288901	0.968464	0.0949049	0.384089	0.349379	0.0730775	0.840511
621	Ssa#NM_001173710.1	Interleukin-6 receptor subunit alpha	0.355288	0.391472	0.829953	0.0292532	0.885479	0.118427	0.546531	0.170807	0.18644	0.621716
622	Ssa#NM_001173711.1	ERBB receptor feedback inhibitor 1	1.55766	0.0751765	1.86988	0.0344831	3.57824	0.000149567	3.55848	0.000417135	0.994327	0.230725
623	Ssa#NM_001173712.1	Phosphatidylinositol binding clathrin assembly protein a	0.294138	0.560832	0.967408	0.00749057	1.04436	0.0113345	0.594701	0.149011	0.438281	0.246378
624	Ssa#NM_001173713.1	Regulator of chromosome condensation	-0.973697	0.00872119	-0.871639	0.0129038	-1.71824	0.000239712	-0.489884	0.226872	0.0683859	0.826689
625	Ssa#NM_001173718.1	RAN binding protein 9	-0.475056	0.13659	-0.534841	0.00252475	-0.561495	0.00114145	-0.803566	0.00208637	-0.730306	0.00182803
626	Ssa#NM_001173723.1	Probable E3 ubiquitin-protein ligase makorin-2	-0.667308	0.073122	-0.84264	0.000370649	-0.766662	0.00987044	-0.971738	0.0077329	-0.583374	0.0189977
627	Ssa#NM_001173728.1	Heparan sulfate 2-O-sulfotransferase 1	0.0547846	0.867596	0.808584	0.0023221	0.43076	0.0560817	0.00651847	0.977298	0.103294	0.621996
628	Ssa#NM_001173733.1	Serine/threonine-protein kinase 35	-1.09277	0.00196153	-0.672043	0.00518633	0.00919418	0.971568	-0.834622	0.0542118	-0.226323	0.434537
629	Ssa#NM_001173736.1	Zinc transporter SLC39A11	-0.0976335	0.795211	0.0698598	0.824471	-0.158724	0.690904	-0.689468	0.111054	-0.935201	0.0468603
630	Ssa#NM_001173741.1	DNA replication licensing factor MCM4	-0.310005	0.554192	1.26228	0.00916463	0.343364	0.432427	1.29619	0.0255846	1.07869	0.0468924
631	Ssa#NM_001173744.1	Transmembrane protein 43 (tmm43)	1.05601	0.0134797	1.90898	7.10441e-06	1.68721	0.000573976	1.14618	0.0172754	0.868115	0.0312014
632	Ssa#NM_001173746.1	CI150 protein	0.900765	0.00225127	0.788065	0.003858	0.0765355	0.709722	0.196526	0.404993	0.130821	0.555654
633	Ssa#NM_001173750.1	Coronin-1C	-0.978047	0.000568489	-1.05562	0.000165272	-1.13528	0.000492059	-1.2831	0.000517746	-0.459544	0.0501615
634	Ssa#NM_001173752.1	DNA replication licensing factor MCM6	-1.20589	0.000720957	-1.02891	0.0281539	-2.29235	0.00105278	-0.593746	0.0171407	-0.120534	0.45063
635	Ssa#NM_001173754.1	Integral membrane protein DGCR2/IDD	-0.218424	0.548124	-0.855595	8.77604e-06	-0.974282	0.000200052	-0.875469	0.00373403	-0.856148	0.0127988
636	Ssa#NM_001173755.1	GH3 domain-containing protein	-0.858703	0.022563	-0.203976	0.0532779	-0.351747	0.0172953	-0.178605	0.301904	-0.0897319	0.512539
637	Ssa#NM_001173757.1	mRNA-capping enzyme	0.243149	0.286927	0.979472	0.00084425	1.63611	6.0462e-05	0.486	0.0501941	0.31112	0.146305
638	Ssa#NM_001173758.1	Glycerol kinase 2	-1.10254	0.0236755	-0.542389	0.185138	-1.08783	0.00396494	-0.990426	0.0385421	-0.125792	0.698388
639	Ssa#NM_001173761.1	Intraflagellar transport protein 88 homolog	-0.828816	0.0898248	-0.966322	0.00467095	-0.967265	0.00580366	-1.55275	0.00670315	-1.21153	0.00461423
640	Ssa#NM_001173769.1	Proline-rich AKT1 substrate 1	0.777862	0.172511	1.34701	0.00142404	1.38491	0.00178667	1.23756	0.00550552	1.03067	0.0135458
641	Ssa#NM_001173775.1	Rap1 GTPase-activating protein 1	0.433936	0.251624	1.5405	0.000267465	1.35755	0.00240409	0.895966	0.0228959	0.490301	0.186605
642	Ssa#NM_001173781.1	Polycomb complex protein BMI-1-A	0.139925	0.584894	0.713767	0.00636639	0.946632	0.000920287	0.651189	0.0294975	0.488038	0.0956878
643	Ssa#NM_001173782.1	Dynein light chain 4, axonemal	-0.077302	0.822476	0.675847	0.00799045	0.656758	0.0301069	0.579158	0.0733713	0.864371	0.0127551
644	Ssa#NM_001173784.1	TRAF2-binding protein	1.50078	0.000606472	1.48016	0.000228112	1.66973	9.23522e-05	1.26673	0.00496962	1.07869	0.0137382
645	Ssa#NM_001173791.1	Cell differentiation protein RCD1 homolog	-0.0212362	0.959741	0.769251	0.0190059	1.22076	0.00252516	0.587952	0.0937472	0.0359094	0.905432
646	Ssa#NM_001173794.1	PiggyBac transposable element-derived protein 4	-0.559144	0.13603	-0.562589	0.0142895	-0.00756868	0.978411	-1.27341	0.00976775	-0.405389	0.126481
647	Ssa#NM_001173795.1	Solute carrier family 39	-0.375673	0.0371327	-0.746384	0.00110641	-0.711742	0.000482114	-1.03437	0.000224228	-0.622548	0.00606899
648	Ssa#NM_001173800.1	Beta-1,3-glucosyltransferase	0.651542	0.155967	0.767228	0.0112436	0.904484	0.0122384	0.741336	0.0756841	-0.0417898	0.887463
649	Ssa#NM_001173801.1	TAF6-like RNA polymerase II p300/CBP-associated factor-associated factor 65 kDa subunit 6L	-0.828807	0.000527921	-0.209998	0.18844	-0.242527	0.147389	-0.0561409	0.781785	-0.117856	0.559123
650	Ssa#NM_001173807.1	Serine/threonine-protein phosphatase dullard-A	-1.0765	0.00625254	-0.388362	0.0224803	-0.48057	0.00963943	-0.451339	0.0173964	-0.678886	0.00663034
651	Ssa#NM_001173817.1	Signal transducer and activator of transcription 5.1	0.499013	0.00628991	0.262307	0.132228	0.467796	0.0111138	0.0935967	0.599805	-0.909185	0.0443536
652	Ssa#NM_001173820.1	Translation initiation factor eIF-2B subunit gamma	-0.425613	0.0660749	-0.331985	0.074696	-0.0898236	0.56503	0.818058	0.0689602	1.05722	0.000440626
653	Ssa#NM_001173822.1	Hermansky-Pudlak syndrome 4 protein	0.316667	0.422162	0.909643	0.0325535	0.741243	0.0795647	0.599236	0.206931	0.655021	0.159936
654	Ssa#NM_001173825.1	Protein-L-isoaspartate	0.499167	0.164931	0.498442	0.0457451	0.821407	0.0197028	0.744178	0.0070164	0.23465	0.378565
655	Ssa#NM_001173826.1	Signal peptide peptidase-like 2 - Ident 42	0.010314	0.987364	0.845562	0.0491928	0.970889	0.0520087	0.616745	0.236491	0.629073	0.205374
656	Ssa#NM_001173833.1	BRI3-binding protein	-1.03409	0.0434418	-0.527264	0.11278	-1.11346	0.00259267	-1.17018	0.0100794	-0.418192	0.241581
657	Ssa#NM_001173834.1	Bmp2a protein	0.820259	0.00844676	0.673977	0.00776864	0.776571	0.000818514	0.268545	0.103462	1.11232	0.000563286
658	Ssa#NM_001173842.1	TRAF-type zinc finger domain-containing protein 1	0.869079	0.0152143	0.357238	0.219169	0.0195095	0.942039	0.198353	0.490387	0.215375	0.579556
659	Ssa#NM_001173845.1	Cyclic AMP-dependent transcription factor ATF-5	0.169663	0.620578	0.0702629	0.791437	-0.122206	0.612245	2.2705	0.00444753	2.51941	0.000296179
660	Ssa#NM_001173847.1	Acyl-coenzyme A oxidase 1, peroxisomal	0.660509	0.120715	0.953892	0.0064439	0.417367	0.312191	0.0214145	0.952828	0.350913	0.313791
661	Ssa#NM_001173858.1	Nucleoredoxin	-0.455748	0.118909	-0.742495	0.000410391	-0.920472	0.000163053	-0.600157	0.0101755	-0.463564	0.0440496
662	Ssa#NM_001173861.1	DET1 homolog	-0.96849	0.000198732	-0.282418	0.237728	-0.770025	0.000719803	-0.449788	0.026568	-0.252912	0.221382
663	Ssa#NM_001173864.1	Membrane-associated guanylate kinase, WW and PDZ domain-containing protein 3	-0.152137	0.561776	-0.805939	1.9291e-05	-0.688529	4.02791e-05	-0.497278	0.00707598	-0.463885	0.00648397
664	Ssa#NM_001173881.1	Pre-mRNA-processing factor 19	-0.649458	0.0125195	-0.54006	0.00670321	-0.920354	0.00288377	-0.474829	0.0273198	-0.634469	0.00214319
665	Ssa#NM_001173907.1	Nuclear autoantigenic sperm protein	-1.06262	0.0290793	-0.204676	0.514296	-1.28771	0.00440734	-0.386516	0.317151	0.224536	0.515229
666	Ssa#NM_001173912.1	PR domain containing 9	-0.157401	0.483775	0.717211	0.012036	0.689461	0.0135831	1.41755	0.00400991	0.769233	0.00330694
667	Ssa#NM_001173913.1	Lysophosphatidylcholine acyltransferase 2	0.705015	0.0152824	1.42863	8.60413e-05	1.78145	1.72237e-05	1.44662	0.000314911	0.897265	0.0021538
668	Ssa#NM_001173918.1	NEDD8-conjugating enzyme Ubc12	0.20537	0.669908	1.15553	1.69605e-06	0.948229	0.00103218	0.830232	0.000163281	1.35364	1.20388e-06
669	Ssa#NM_001173921.1	ER degradation-enhancing alpha-mannosidase-like 1	-0.730298	0.011997	-0.905274	0.00316294	-0.864757	0.000531807	-1.46304	5.23642e-05	-0.814355	0.00634901
670	Ssa#NM_001173926.1	Platelet-derived growth factor receptor-like protein	0.0528492	0.858909	1.0052	0.0150952	1.00447	0.0130595	1.06861	0.0372906	0.675086	0.111421
671	Ssa#NM_001173929.1	Heat shock 70 kDa protein 13	-0.564609	0.042422	-0.930028	0.0095329	-1.15428	0.000992611	-1.22468	0.00110552	-0.755869	0.0492156
672	Ssa#NM_001173939.1	Dihydropyrimidinase	0.336146	0.639806	1.63481	1.50545e-05	1.65739	8.88709e-06	1.44956	0.000347997	1.23288	0.000730813
673	Ssa#NM_001173940.1	Eukaryotic translation initiation factor 3 subunit E-interacting protein	0.841077	0.0502686	1.02804	0.0106067	1.13801	0.0119465	0.980724	0.0431442	0.923732	0.0519052
674	Ssa#NM_001173943.1	Glutamate--cysteine ligase regulatory subunit	-0.754984	0.0141716	-0.820564	0.00188645	-0.971808	0.00129	-1.06103	0.00117271	-0.893909	0.00438568
675	Ssa#NM_001173948.1	RNA-binding protein 4	-0.581502	0.013708	-0.884776	0.000150903	-1.069	4.01952e-05	-1.06394	0.000932554	-0.876102	0.00114168
676	Ssa#NM_001173951.1	Transcription factor CP2-like protein 1	0.606203	0.138369	1.04512	0.0280692	2.37954	0.000110419	1.8897	0.0077219	0.647073	0.149346
677	Ssa#NM_001173959.1	RAP2C, member of RAS oncogene family	-0.292194	0.244285	-0.402841	0.0157797	-0.674414	0.00135875	-0.860771	0.00696235	-0.403952	0.042598
678	Ssa#NM_001173963.1	Neutral and basic amino acid transport protein rBAT (slc31)	0.190943	0.566033	0.0787776	0.806104	0.618113	0.107507	0.526302	0.249333	1.17327	0.018956
679	Ssa#NM_001173964.1	ATP-sensitive inward rectifier potassium channel 11	-0.471555	0.280671	-1.0011	0.00238295	-1.08117	0.00276535	-1.02216	0.00864241	-1.20765	0.0029385
680	Ssa#NM_001193454.1	selenoprotein L	-0.282749	0.71366	-0.183283	0.657573	-0.987618	0.0396611	-0.887538	0.128733	0.159585	0.768804
681	Ssa#NM_001252356.1	Microtubule-associated protein 1 light chain 3 beta	0.73666	0.0224667	0.637485	0.00283543	1.28707	0.000184796	0.969613	0.00139242	0.51843	0.024645
682	Ssa#NM_001252359.1	Osteopetrosis-associated transmembrane protein 1	-0.513854	0.193335	-0.838438	5.32896e-05	-0.663522	0.00205921	-0.647237	0.0128414	-0.453562	0.0203979
683	Ssa#NM_001252361.1	interferon regulatory factor 1	0.883127	0.0258872	0.733226	0.0456941	0.824643	0.0242295	0.77638	0.0370652	0.562338	0.165937
684	Ssa#NM_001279033.1	ER membrane protein complex subunit 4	-0.0319816	0.893913	-0.812348	3.78087e-05	-0.73135	0.00122909	-0.916677	0.00336834	-0.522815	0.00758
685	Ssa#NM_001279038.1	Histone deacetylase complex subunit SAP30	-0.700213	0.0990099	-0.519941	0.186298	-0.918111	0.0369115	-0.582494	0.189041	-0.230519	0.594781
686	Ssa#NM_001279042.1	Eukaryotic translation initiation factor 5A	0.357205	0.471076	0.815734	0.0206412	1.17967	0.00629761	1.23747	0.0162823	0.729404	0.0840651
687	Ssa#NM_001279048.1	GSK-3-binding protein	0.0894702	0.879379	0.923519	0.161894	2.09903	0.00112859	1.96093	0.00499702	0.772161	0.200813
688	Ssa#NM_001279074.1	beta-carotene 15,15'-monooxygenase 1 like	-0.369167	0.222914	-0.467826	0.07821	-1.00762	0.0656546	-1.50263	0.00108043	-0.711758	0.0452479
689	Ssa#NM_001279082.1	Beta-carotene 15, 15-dioxygenase 2, like	-0.0632402	0.795561	0.153447	0.465752	0.215357	0.365293	-0.603865	0.0695295	-0.809897	0.0121667
690	Ssa#NM_001279087.1	Mul1b protein	0.402124	0.157159	0.865416	0.00182917	0.720418	0.00680145	0.866356	0.0270493	0.492329	0.0126362
691	Ssa#NM_001279092.1	IFNd	-0.240557	0.16081	-0.812773	0.000550674	-1.04003	0.00153358	-1.02598	0.000503663	-0.652524	0.0152418
692	Ssa#NP_001117119.1_35892	insulin-like growth factor II	0.0266862	0.94551	1.05716	0.0104898	0.728664	0.0615078	0.232039	0.558052	0.315483	0.365372
693	Ssa#NP_001133191.1_31343	Not	0.548216	0.188863	3.45317	4.35256e-06	4.66849	2.3483e-07	3.6775	1.89824e-05	1.98989	0.00624022
694	Ssa#NP_001133192.1_18126	Not	0.473787	0.0460907	1.64248	2.95856e-06	2.52922	1.84287e-07	1.60864	0.000125394	0.46431	0.107964
695	Ssa#NP_001133551.1_22807	Phospholipase B domain containing 1	0.0916888	0.511121	0.686348	0.00744706	0.511549	0.032743	0.788111	0.00204825	0.820649	0.0123731
696	Ssa#NP_001133813.1_18562	Sequestosome-1	-0.122367	0.682676	0.724932	0.00121157	1.13786	0.000241537	0.825988	0.000301887	0.656316	0.0158353
697	Ssa#NP_001133925.1_50015	Not	-0.154949	0.643266	0.30173	0.11348	0.210745	0.322103	0.647567	0.0534319	0.883853	0.00996233
698	Ssa#NP_001134846.1_1205	Not	-0.79736	0.0314534	-0.463147	0.0895716	-0.365097	0.173881	-1.32511	0.00147386	-1.5224	0.000793613
699	Ssa#NP_001135031.1_71158	Not	-1.7105	0.00145027	-0.612933	0.146879	-1.09451	0.0196182	-0.0748261	0.836274	-0.139717	0.691826
700	Ssa#NP_001180476.1_3194	Not	0.386251	0.293325	0.706301	0.0424059	0.71301	0.0946234	1.15647	0.00981661	1.0578	0.0171055
701	Ssa#NP_008450.1_97913	Not	-0.45139	0.0359694	-0.598951	0.000510379	-0.721963	0.000205437	-0.852688	0.000300182	-0.586951	0.0013671
702	Ssa#NW_012348474.1	Not	-0.445245	0.400669	-0.320231	0.301365	-0.419227	0.172151	-0.687414	0.123958	-1.01344	0.00853353
703	Ssa#NW_012348757.1	Not	-1.63509	0.221222	-2.68583	6.09021e-06	-2.89831	5.52903e-05	-3.22871	0.000373754	-3.75745	1.22292e-05
704	Ssa#NW_012349958.1	Not	-0.113986	0.756056	-1.36837	0.000935737	-1.02478	0.0371904	-1.37341	0.00237793	-1.42637	0.000844214
705	Ssa#NW_012350242.1	Not	-0.313654	0.671152	-0.651273	0.00642578	-0.837585	0.00968859	-0.946779	0.0344782	-1.33974	0.000685116
706	Ssa#NW_012350282	Not	-0.734969	0.00997993	-1.23645	0.000284671	-1.14759	0.000980366	-1.44313	0.00172731	-1.40472	4.17143e-06
707	Ssa#NW_012353796.1	unconventional myosin-XV-like	-1.10573	0.0510495	-1.8168	1.1784e-05	-1.88266	6.21568e-06	-1.90529	4.69735e-05	-1.94298	1.71354e-05
708	Ssa#NW_012354029.1	Not	0.182403	0.579921	1.01753	9.74254e-05	1.22033	2.0858e-05	1.40448	0.000319473	0.710876	0.0376612
709	Ssa#NW_012354625.1	Not	-0.192927	0.620554	-0.688754	0.0215838	-0.800764	0.0134475	-0.812852	0.0245394	-0.678842	0.0373264
710	Ssa#NW_012354919.1	Acyl-CoA-binding domain-containing protein 7	-0.467021	0.215672	-0.329809	0.370569	-0.834033	0.0161089	-0.305856	0.546617	-0.173093	0.533758
711	Ssa#NW_012357413.1	Not	-1.53876	0.067139	-2.28716	2.24422e-06	-2.46835	8.76613e-06	-2.21448	1.26231e-05	-2.46583	0.000759683
712	Ssa#NW_012357414.1	Not	-1.57836	0.102476	-2.25717	0.000718729	-2.35534	0.00106297	-1.84101	0.0138593	-2.05142	0.0123299
713	Ssa#NW_012360299.1	Not	-0.249497	0.205861	0.429458	0.0261833	0.248366	0.216378	0.526126	0.0722691	0.89532	0.000328731
714	Ssa#NW_012365972.1	Not	0.284076	0.382208	0.329596	0.147256	0.610948	0.170627	1.00685	0.00807386	0.128757	0.613603
715	Ssa#NW_012376613.1	Not	-1.45394	0.0523811	-2.9449	6.74858e-08	-2.73018	5.91904e-07	-2.25224	3.47234e-05	-3.08006	0.000132043
716	Ssa#NW_012379265.1	N-alpha-acetyltransferase 10	-0.106071	0.698631	0.456515	0.0638846	0.390987	0.128508	0.830319	0.0245381	0.889812	0.0193863
717	Ssa#NW_012455020.1	Not	-0.368141	0.445957	-0.255462	0.180325	-0.444049	0.079801	-0.387752	0.300887	-0.822178	0.00125972
718	Ssa#NW_012488370.1	caspase-2-like	0.915106	0.0478993	1.11305	0.0152308	1.28467	0.00156859	1.31895	0.00581671	1.08971	0.00808276
719	Ssa#S18846628	Chromosome transmission fidelity protein 8 homolog isoform 2	0.809823	0.456219	1.41192	0.00713531	1.2864	0.0512985	0.376807	0.411604	-0.29475	0.52811
720	Ssa#S18860977	UDP-glucuronosyltransferase 2A2	0.298804	0.662491	1.61746	0.00172604	1.37697	0.0330964	1.6743	0.00191586	0.912376	0.081195
721	Ssa#S21512939	C type lectin receptor C	0.92504	0.0106872	1.02042	0.00190623	1.19614	0.00116498	1.11656	0.00512874	0.455209	0.14601
722	Ssa#S30239545	Thrombomodulin	-0.370099	0.414667	-0.87634	0.000601711	-0.845674	0.00161923	-0.881378	0.00344736	-0.832916	0.00579307
723	Ssa#S30258472	Apoptosis-associated speck-like protein containing a CARD	-0.467845	0.286541	-0.252138	0.430527	0.0311938	0.931424	0.432843	0.360639	1.27711	0.0143576
724	Ssa#S30258716	Cyclin-D-binding Myb-like transcription factor 1	-0.028066	0.913542	0.73571	0.0121209	1.25133	0.00174988	0.421979	0.115104	0.190972	0.421983
725	Ssa#S31100455	glutathione S-transferase P	-0.918026	0.0110437	-1.59883	0.000158911	-1.81447	1.77929e-05	-2.39341	1.37515e-05	-1.12499	0.00207486
726	Ssa#S31979196	DNA gyrase B-, and HSP90-like domain containing protein	0.783701	0.0743868	1.08223	7.73168e-05	1.66106	3.92827e-05	1.05747	0.00459838	0.533151	0.0192405
727	Ssa#S31991995	Acidic leucine-rich nuclear phosphoprotein 32 family member B	0.51473	0.210174	0.965305	7.64214e-05	0.66819	0.00744373	0.320854	0.251923	0.103476	0.459573
728	Ssa#S31993460	Dihydrolipoyl dehydrogenase, mitochondrial	-0.81811	0.198372	-1.80533	2.45811e-05	-1.65323	0.00016315	-1.89025	0.000149964	-1.95891	0.000150412
729	Ssa#S31998118	Creatine kinase, mitochondrial 1	-0.283994	0.518967	-0.407235	0.220358	-0.373337	0.3484	-1.24048	0.0131925	-0.955541	0.0469426
730	Ssa#S35469852	NADH dehydrogenase subunit 6	0.172501	0.525061	-0.682338	0.0126983	-0.402463	0.219675	-0.664422	0.0311494	-0.812166	0.0127965
731	Ssa#S35478215	Cyclin-dependent kinase inhibitor 1C	0.352107	0.17903	0.289079	0.10366	0.95612	0.00197381	0.115238	0.54002	0.291768	0.240517
732	Ssa#S35519305	Gig2-6	-0.34285	0.0572121	-0.431948	0.0859976	-0.818323	0.00103073	-0.402418	0.0564915	0.0169732	0.921123
733	Ssa#S35527640	NADP transhydrogenase, mitochondrial precursor	-0.100564	0.795924	0.767882	0.000150235	0.777895	0.00106772	0.90873	0.000335218	0.848001	0.00276317
734	Ssa#S35547861	Vesicle-associated membrane protein 5	1.39601	0.00978709	0.851855	0.0400705	1.18403	0.0103273	0.449652	0.324065	0.203367	0.651241
735	Ssa#S35550601	Amyloid beta A4 precursor protein-binding family B	-0.605766	0.382755	-1.22925	0.000289274	-1.19574	0.000970098	-1.19165	0.0198824	-1.66037	0.0010268
736	Ssa#S35561655	UDP glucuronosyltransferase 5 family polypeptide b3 - Ident 92	-0.0451022	0.881115	0.309022	0.238479	1.00326	0.00447972	1.2198	0.00934368	-0.075548	0.831767
737	Ssa#S35579881	Novel protein with a AIG1 family domain	0.52534	0.116055	1.11118	0.00130294	0.603685	0.0641805	0.840965	0.0125418	-0.10147	0.353478
738	Ssa#S35581377	Alpha-tropomyosin	0.0675066	0.843505	-0.87181	0.163981	-0.868193	0.0370979	-0.671283	0.0815166	-0.137577	0.685646
739	Ssa#S35590058	Gamma-interferon-inducible lysosomal thiol reductase precursor	1.15238	0.0926481	1.5092	0.000770972	1.36357	0.00358299	1.07705	0.0172795	1.26545	0.00661503
740	Ssa#S35594921	Chromosome transmission fidelity protein 8 homolog	-0.343026	0.0455824	0.137431	0.453346	-0.342236	0.0735087	0.271833	0.333376	0.922518	0.00212034
741	Ssa#S35599926	Choline transporter-like protein 2	0.729666	0.046192	1.16494	0.000154387	1.20998	0.000337424	0.960702	0.00624046	-0.509448	0.194558
742	Ssa#S35666682	Pre-mRNA cleavage complex 2 protein Pcf11	-0.138258	0.727727	0.739783	0.0173359	0.811561	0.00213519	0.590241	0.078332	0.228795	0.363764
743	Ssa#S35670649	TNFAIP3-interacting protein 1	0.394433	0.190337	0.665562	0.0167196	1.06899	0.0026074	0.298106	0.313577	0.354903	0.263611
744	Ssa#S35681036	Nuclear protein 1	1.30809	0.012128	0.503717	0.167942	1.49825	0.000885501	-0.195963	0.675095	-0.60883	0.127498
745	Ssa#S35694758	collagen Type XI Alpha2	0.809315	0.0708151	1.38188	0.000108762	0.974024	0.0698643	0.447499	0.20929	0.336065	0.263814
746	Ssa#S41657824	Oligoribonuclease, mitochondrial	0.535968	0.230266	1.36845	0.000299715	1.27144	9.72229e-05	1.68882	0.00064626	2.42051	1.70016e-05
747	Ssa#S48371191	Glyceraldehyde-3-phosphate dehydrogenase, spermatogenic	-0.585404	0.212417	-1.2098	0.00264366	-1.47608	0.000333098	-1.48535	0.00067357	-1.44176	5.25424e-05
748	Ssa#S50152575	collagen 2a1	-0.393461	0.196058	-1.027	0.00250624	-0.94899	0.00258606	-0.720481	0.0316562	-0.843963	0.00913267
749	Ssa#STIR26032	heat shock protein 70	1.374	0.0448929	1.18073	0.0414007	0.757755	0.201077	0.995554	0.221101	0.282205	0.683776
750	Ssa#STIR29454	beta defensin-like peptide 1	-0.460152	0.254314	-0.704922	0.00526369	-0.530783	0.0665875	-0.779997	0.0177377	-0.938343	0.0059084
751	Ssa#TC100887	Ceramide glucosyltransferase	0.466059	0.223267	0.456917	0.209873	0.869244	0.0442384	0.483154	0.14601	0.0761887	0.746024
752	Ssa#TC108990	CWF19-like protein 2	-0.111266	0.788384	-0.35586	0.0315764	-0.466211	0.00728224	-0.688125	0.06806	-0.884301	0.000304203
753	Ssa#TC69597	NMDA receptor-regulated protein 1	-1.57079	0.00308796	-1.8801	3.14829e-08	-2.13583	2.17651e-07	-1.86853	1.42079e-05	-1.73679	1.31011e-05
754	Ssa#TC98269	Zinc finger_ BED domain containing 4 - Ident 94	1.40055	0.190073	1.86195	0.000124274	1.83564	0.000960454	0.833361	0.0638347	0.0240318	0.938375
755	Ssa#TC99647	UDP-glucuronosyltransferase 2A2	-0.0135374	0.975388	0.840236	0.00100505	0.646256	0.00984242	0.924255	0.00425017	0.161408	0.48676
756	Ssa#XM_014122844.1	Heme-binding protein soul3	0.48231	0.137956	0.862298	0.00544278	1.65945	0.00159553	0.561097	0.124755	0.15145	0.649317
757	Ssa#XM_014122847.1	Ubiquitin carboxyl-terminal hydrolase isozyme L5	-0.684878	0.123256	-0.597472	0.00787451	-0.966864	0.00794905	-0.144695	0.68024	0.118583	0.746392
758	Ssa#XM_014122852.1	histone-lysine N-methyltransferase 2D-like	-0.813413	0.050399	-1.10186	0.00948222	-1.03267	0.0256214	-1.1944	0.0168194	-1.21503	0.0217743
759	Ssa#XM_014122855.1	Phosphoribosylaminoimidazole carboxylase	0.745702	0.142107	1.26526	9.63648e-05	1.46613	3.33884e-05	1.44927	0.000118684	1.3955	0.000231096
760	Ssa#XM_014122869.1	Lipid phosphate phosphohydrolase 3	0.172635	0.569045	-0.817589	0.00420524	-0.845643	0.00700406	-0.645068	0.0924737	-0.785985	0.0530953
761	Ssa#XM_014122915.1	Protein NDNF	0.443291	0.22195	0.682374	0.0273802	0.844249	0.0325123	0.625458	0.0935703	0.557769	0.147744
762	Ssa#XM_014122920.1	Palladin	0.521677	0.0273941	0.670861	0.0183836	1.06155	0.00242622	0.797004	0.00330025	0.519701	0.0431141
763	Ssa#XM_014122977.1	E3 ubiquitin-protein ligase LNX-like	0.00214464	0.992791	0.0700459	0.621941	0.463202	0.0371807	1.37472	0.000119747	2.0113	5.8097e-06
764	Ssa#XM_014123021.1	Amidophosphoribosyltransferase	-0.755232	0.00699758	-0.568403	0.0029068	-0.642866	0.0166146	-0.834943	0.00393134	-0.711732	0.00135111
765	Ssa#XM_014123083.1	Bromodomain-containing 2a	0.16121	0.725777	0.711207	0.0160017	0.599769	0.0121039	0.85078	0.00853386	0.406472	0.0824222
766	Ssa#XM_014123121.1	Ribosomal protein L5b	0.109933	0.858711	0.749171	0.0250398	0.886486	0.0223827	0.797339	0.054078	0.812136	0.054043
767	Ssa#XM_014123126.1	Guanine nucleotide binding protein	-0.158676	0.70195	-0.975424	0.00259601	-0.681231	0.063547	0.0539128	0.943693	-0.822866	0.029725
768	Ssa#XM_014123128.1	4-hydroxyphenylpyruvate dioxygenase-like protein	-1.74368	0.0017959	-1.32273	0.0151579	-2.00803	0.000585297	-0.421585	0.443635	-0.101068	0.857192
769	Ssa#XM_014123135.1	Growth arrest and DNA-damage-inducible, beta b	-0.227449	0.465752	-0.363896	0.12431	-0.383997	0.0518227	0.823087	0.0293885	0.651325	0.135779
770	Ssa#XM_014123138.1	Glutamine synthetase	0.337538	0.0986637	1.31452	0.000950014	1.69043	0.000403211	2.72354	3.3441e-06	2.10512	0.00128683
771	Ssa#XM_014123180.1	4-hydroxyphenylpyruvate dioxygenase-like protein	-1.9099	0.0169168	-0.62331	0.360424	-1.8679	0.00405459	0.328438	0.648006	0.615365	0.345734
772	Ssa#XM_014123187.1	Cadherin 2, neuronal	0.521454	0.0157874	-0.627128	0.00603281	-0.264343	0.182293	-1.08358	0.00108487	-1.0148	0.000787037
773	Ssa#XM_014123209.1	Mitogen-activated protein kinase 8b	-0.354604	0.482166	-0.892436	0.000521027	-0.965086	0.000881982	-0.943706	0.00336753	-1.01144	0.00228417
774	Ssa#XM_014123234.1	Valacyclovir hydrolase	0.210453	0.42933	-0.0788968	0.659486	2e-07	0.999999	0.707499	0.0105034	0.869295	0.00347244
775	Ssa#XM_014123240.1	Elongation factor-1, delta, a	0.030213	0.919244	0.525176	0.0138828	0.572872	0.151541	0.837144	0.0224074	1.01141	0.00247325
776	Ssa#XM_014123263.1	transthyretin	-0.692076	0.0578292	-1.24824	7.40436e-06	-0.99087	0.00642241	-0.951023	8.82884e-05	-0.891815	0.000348826
777	Ssa#XM_014123293.1	Zinc finger CCCH domain-containing protein 3	0.549128	0.109413	0.930604	0.00866071	1.20876	0.00566094	0.56356	0.143696	0.51646	0.173995
778	Ssa#XM_014123351.1	Syntaxin-binding protein 3	0.264718	0.592482	1.01562	0.00489892	0.803558	0.0412671	1.20155	0.0104397	1.44813	0.00403824
779	Ssa#XM_014123385.1	tetratricopeptide repeat domain 4	0.178963	0.63967	0.304894	0.344123	0.0366209	0.919367	0.838753	0.0848785	1.07578	0.0249899
780	Ssa#XM_014123437.1	EF-hand calcium-binding domain-containing protein 7	0.276802	0.322098	1.12901	0.000235143	1.45621	0.000152887	1.18483	0.00265678	1.42046	0.000326444
781	Ssa#XM_014123450.1	ficolin-1-like	-0.320653	0.379667	-2.77916	5.69701e-07	-3.49278	5.5081e-09	-3.21684	1.6779e-05	-3.30203	9.32911e-07
782	Ssa#XM_014123452.1	Angiopoietin-related protein 3	-0.664528	0.281547	-2.3628	0.00774468	-3.38174	0.000711555	-2.08019	0.0183889	-2.87561	0.00390625
783	Ssa#XM_014123455.1	Dedicator of cytokinesis 8	-0.113841	0.811162	0.620027	0.0741772	1.08256	0.0183704	0.192566	0.628316	0.239367	0.546158
784	Ssa#XM_014123456.1	Ubiquitin carboxyl-terminal hydrolase 1	-0.831674	0.0267636	-0.162863	0.532395	-0.749465	0.0303853	-0.212428	0.485347	0.0737248	0.836161
785	Ssa#XM_014123461.1	vegetative cell wall protein gp1-like	-0.767678	0.265482	-1.04864	0.000124421	-1.26304	0.00217958	-1.47509	0.000658832	-1.83316	0.000193345
786	Ssa#XM_014123475.1	Tryptophan--tRNA ligase, cytoplasmic	0.0106692	0.971377	0.124266	0.739596	0.236436	0.49786	1.42435	0.00931741	1.82592	0.000808279
787	Ssa#XM_014123482.1	thrombopoietin receptor-like	0.581382	0.0660785	0.55156	0.00318311	0.769108	0.000905731	1.01492	0.000782854	1.05222	0.000492734
788	Ssa#XM_014123527.1	SWT1 RNA endoribonuclease homolog (S. cerevisiae) (swt1), X1	0.651415	0.0380735	0.992573	0.000900052	0.829976	0.00174145	0.51026	0.0123383	0.594899	0.018655
789	Ssa#XM_014123543.1	Abnormal spindle-like microcephaly-associated protein	-0.934152	0.122021	-1.08395	0.0361802	-0.217865	0.660697	-1.38879	0.0602397	0.0669949	0.921372
790	Ssa#XM_014123544.1	complement factor H-related 5	0.808969	0.197832	0.768454	0.142112	0.783349	0.218259	1.11022	0.0878858	1.46821	0.0275819
791	Ssa#XM_014123555.1	Cytosolic phospholipase A2	-0.18267	0.354539	-0.594436	0.00334021	-0.815232	0.0023726	0.0305328	0.888095	0.235279	0.338867
792	Ssa#XM_014123563.1	vegetative cell wall protein gp1-like	-0.190944	0.751165	-0.709882	0.0445097	-0.981484	0.014092	-1.04047	0.0613313	-1.38114	0.00713014
793	Ssa#XM_014123565.1	Insulin receptor a	0.172324	0.518975	0.54658	0.0519073	0.919509	0.00109316	-0.0563935	0.816273	-0.557941	0.0310404
794	Ssa#XM_014123581.1	Son of sevenless homolog 2	-0.0787103	0.766321	0.643683	0.00801945	0.862892	0.00369379	0.696448	0.0676327	0.342468	0.0910807
795	Ssa#XM_014123582.1	BRISC and BRCA1-A complex member 1	-0.96216	5.66383e-05	-0.33281	0.0523231	-0.528161	0.00212297	-0.253126	0.284682	-0.0972847	0.54664
796	Ssa#XM_014123587.1	Nuclear receptor subfamily 2, group F, member 6b	-0.67468	0.163146	-1.05343	0.00303725	-1.10722	0.00434933	-1.19903	0.00683823	-1.26465	0.00500006
797	Ssa#XM_014123596.1	prothymosin alpha-A-like	0.201068	0.466339	0.883695	0.0023732	0.810528	0.0146349	0.387841	0.166713	0.475064	0.0787851
798	Ssa#XM_014123620.1	histidine-rich glycoprotein-like	0.28529	0.299167	0.58287	0.00806027	0.812288	6.89654e-05	1.08668	0.000809628	0.689122	0.00396635
799	Ssa#XM_014123632.1	transmembrane 4 L6 family member 4-like	-0.0989482	0.793852	-0.512043	0.0746469	-0.946573	0.0180603	-0.896297	0.0249404	-1.02334	0.0152996
800	Ssa#XM_014123633.1	Lamin B2	-0.132735	0.686046	0.67187	0.0574147	0.823586	0.0219281	0.358199	0.451148	0.463605	0.235638
801	Ssa#XM_014123634.1	Lon protease homolog, mitochondrial	-0.433924	0.0401775	-0.583567	0.00336411	-0.770823	0.000374599	0.316525	0.354442	0.808654	0.00416895
802	Ssa#XM_014123662.1	brain-specific angiogenesis inhibitor 1-associated protein 2-like (LOC106605752)	-0.474195	0.0466317	-0.702715	0.00458649	-1.0052	0.000856179	-0.571457	0.0586456	-0.0800651	0.712712
803	Ssa#XM_014123716.1	Band 4.1-like protein 5	-0.439049	0.203981	-0.448298	0.0453935	-0.814296	0.002266	-0.199227	0.431765	-0.000726265	0.997754
804	Ssa#XM_014123740.1	alpha-2-macroglobulin-like protein 1 (LOC106600333), partial mRNA	0.197086	0.508071	-1.25343	0.000302338	-1.5218	0.000105721	-0.977254	0.00568607	-1.38459	0.000999767
805	Ssa#XM_014123741.1	Protein kinase N2	-1.10419	0.000628207	-0.714458	0.000520512	-0.962909	4.84957e-05	-0.951192	0.00111739	-0.542275	0.00462129
806	Ssa#XM_014123765.1	extensin-like	-0.837509	0.297482	-1.67102	1.45024e-05	-1.76993	5.94727e-05	-1.76982	0.000173925	-2.12991	4.14958e-05
807	Ssa#XM_014123806.1	G protein pathway suppressor 2	0.130094	0.769776	1.03254	0.00189009	1.13055	0.00297138	1.01327	0.00897562	0.951543	0.012711
808	Ssa#XM_014123815.1	Eukaryotic initiation factor 4A-III	-0.216869	0.455914	0.538136	0.018617	0.363789	0.4059	1.07183	0.00286365	0.696655	0.0251477
809	Ssa#XM_014123834.1	Cyclin-dependent kinase inhibitor 1C	-0.195496	0.575646	-0.43806	0.0936258	-0.690319	0.00444459	-0.875641	0.00720448	-0.346814	0.0926243
810	Ssa#XM_014123864.1	Carnitine palmitoyltransferase 1B (Muscle) - Ident 97	-0.253194	0.554374	1.01568	0.0017433	1.17227	0.00361954	1.56808	0.000562635	1.52879	0.000138213
811	Ssa#XM_014123919.1	La-related protein 1B	0.285545	0.523778	1.12519	0.0179464	0.9695	0.0456695	1.34009	0.0267553	1.04085	0.0574598
812	Ssa#XM_014123924.1	RNA binding motif protein 41	-0.00699399	0.982679	0.261439	0.320722	0.402792	0.157374	0.900595	0.0194216	0.679878	0.0558584
813	Ssa#XM_014124001.1	FinTRIM family protein - Ident 26	-1.00628	0.231109	-2.37131	0.00990936	-2.85296	0.0048789	-2.43472	0.021758	-2.87357	0.011697
814	Ssa#XM_014124049.1	Paired amphipathic helix protein Sin3a	0.735768	0.0591761	0.572219	0.037833	0.973427	0.000768145	0.281193	0.264417	0.411812	0.239009
815	Ssa#XM_014124083.1	Proline-rich protein BCA3	-0.289414	0.25255	0.320261	0.158838	-0.125811	0.612364	0.755022	0.0255874	1.09046	0.00594916
816	Ssa#XM_014124106.1	Nuclear receptor subfamily 2, group F, member 6b	0.602336	0.13009	1.11583	0.00480958	0.758552	0.0295959	-0.0640922	0.825645	0.352729	0.294583
817	Ssa#XM_014124115.1	Tetratricopeptide repeat protein 23	-0.501902	0.0374706	-0.560111	0.00129243	-0.861526	0.00011949	-0.320919	0.196309	0.352611	0.0145836
818	Ssa#XM_014124116.1	cathepsin L1-like	0.627635	0.0807919	1.06934	0.000405846	1.51383	6.99047e-05	2.43198	8.03743e-06	1.83509	4.06847e-05
819	Ssa#XM_014124170.1	Activating signal cointegrator 1 complex subunit 1	-0.025179	0.907324	0.326233	0.0662567	0.628027	0.00567361	1.09937	0.000814174	1.10896	0.000560713
820	Ssa#XM_014124187.1	hydroperoxide isomerase ALOXE3-like	-0.122869	0.756564	-1.41771	0.000632544	-1.32731	0.00162617	-0.932685	0.0220423	-0.984644	0.0109645
821	Ssa#XM_014124193.1	Transmembrane protein 170A	0.203184	0.693105	0.641006	0.00352652	0.835209	0.0018052	0.991376	0.00204992	0.727009	0.011597
822	Ssa#XM_014124222.1	cholesteryl ester transfer protein-like	0.109248	0.549076	1.0992	2.39975e-05	1.17078	0.000872628	-0.092892	0.739378	-0.287871	0.329432
823	Ssa#XM_014124251.1	Zinc finger protein 423	-0.0169793	0.951402	0.410527	0.0678851	0.703006	0.0211949	0.832158	0.00117647	1.31056	0.000188486
824	Ssa#XM_014124255.1	cadherin-13-like	0.402536	0.465249	0.849071	0.0395834	0.709495	0.0237544	0.53176	0.297985	0.852917	0.0198301
825	Ssa#XM_014124266.1	monocarboxylate transporter 2-like	-0.26351	0.693174	-1.36905	0.0128883	-1.40995	0.0261702	-1.66593	0.0151584	-1.86789	0.00847614
826	Ssa#XM_014124267.1	Cirhin	-1.5139	0.000849171	-0.474518	0.166369	-0.905752	0.0140112	-0.339344	0.436463	-0.472178	0.237429
827	Ssa#XM_014124294.1	Tyrosine aminotransferase	0.85261	0.103911	1.06979	0.00268035	1.42967	0.000876463	1.05927	0.0090089	0.382988	0.287624
828	Ssa#XM_014124312.1	Vacuolar protein sorting 4b	1.04377	0.00688552	1.12138	0.000816325	1.57292	0.000997143	0.458856	0.0838046	-0.397895	0.131894
829	Ssa#XM_014124324.1	WW domain containing E3 ubiquitin protein ligase 2	0.735382	0.15217	1.68097	4.21231e-05	1.51833	0.0077406	1.64167	0.000281321	1.67424	0.000487757
830	Ssa#XM_014124340.1	actin-binding protein anillin-like	-0.583126	0.0639431	-0.102677	0.737356	0.914715	0.0244258	-0.0899991	0.82538	0.42976	0.242814
831	Ssa#XM_014124357.1	C-C motif chemokine 8-like	-0.972042	0.131986	-1.14477	0.0048927	-1.44229	0.0107856	-0.850265	0.0595114	-1.10037	0.0245494
832	Ssa#XM_014124375.1	Probable D-lactate dehydrogenase, mitochondrial	0.142477	0.485751	0.15137	0.193122	0.258726	0.0482305	0.843593	0.000346122	0.163538	0.460373
833	Ssa#XM_014124391.1	Coiled-coil domain-containing protein lobo homolog	-0.074499	0.852802	-0.218643	0.562743	-0.318857	0.402364	-1.11049	0.0295205	-0.969983	0.0482995
834	Ssa#XM_014124405.1	Junctophilin 1b	0.48681	0.10383	0.884895	2.04135e-05	0.743601	0.00233055	0.484052	0.0197896	0.338566	0.000408398
835	Ssa#XM_014124421.1	Aminopeptidase N	0.658395	0.386432	1.1673	0.0355398	1.31945	0.0353153	0.951727	0.151513	0.920652	0.158257
836	Ssa#XM_014124426.1	TIR domain-containing adapter molecule 1-like	-0.382121	0.326215	-2.44884	7.8701e-05	-2.13393	0.000266813	-1.67055	0.000217015	-2.15011	0.000960661
837	Ssa#XM_014124429.1	NT-3 growth factor receptor-like	1.29606	0.19517	1.51925	0.0102445	1.57107	0.00970137	0.951462	0.108939	0.468695	0.378176
838	Ssa#XM_014124452.1	Low density lipoprotein-related protein 6 - Ident 97	-0.03461	0.870637	0.597775	0.0141208	1.04397	0.00170838	0.984873	0.0212101	0.438287	0.0789882
839	Ssa#XM_014124461.1	NEL-like 2b	0.780023	0.0339561	1.24014	0.000207717	1.24013	0.000532614	0.692889	0.0237366	0.496789	0.0310948
840	Ssa#XM_014124471.1	Gamma-tubulin complex component 6	-0.70489	0.00523484	-0.484986	0.00381945	-0.822937	0.000478092	-0.606905	0.0180403	-0.808592	0.000738446
841	Ssa#XM_014124493.1	Serine/arginine-rich protein specific kinase 3	0.839311	0.0450846	1.07903	0.000204086	1.04828	0.00371278	0.713653	0.0488018	1.05872	0.000154574
842	Ssa#XM_014124553.1	Ferritin - Ident 30	-0.458103	0.564654	-0.997639	0.000151193	-1.09633	0.000309301	-1.48118	5.47954e-05	-1.5238	0.000105516
843	Ssa#XM_014124562.1	troponin I, fast skeletal muscle-like	0.7787	0.181189	0.520061	0.27033	1.01248	0.0462658	0.492428	0.271643	-0.0900685	0.820409
844	Ssa#XM_014124565.1	troponin I, fast skeletal muscle-like	-0.0183444	0.967316	-1.18631	0.0105262	-1.32643	0.00840757	-0.547647	0.293103	-0.310463	0.475401
845	Ssa#XM_014124587.1	hyaluronidase PH-20-like	-0.256284	0.0309536	-0.104291	0.473955	-0.0952086	0.44872	1.52174	0.00201799	1.99247	0.0646083
846	Ssa#XM_014124644.1	Pleckstrin homology domain-containing family A mem	-0.39639	0.322162	-0.90836	0.00042706	-0.793459	0.00675406	-1.25146	0.000504168	-1.25821	0.000456577
847	Ssa#XM_014124665.1	NACHT, LRR and PYD domains-containing protein 1	1.39321	0.000826149	0.555719	0.00649392	0.980666	0.000408722	0.356872	0.175182	0.230663	0.381879
848	Ssa#XM_014124680.1	Tripartite motif containing TRIM 25	-0.409277	0.520493	-1.11515	0.0132132	-1.04042	0.0286707	-1.43748	0.00989936	-1.0557	0.0437911
849	Ssa#XM_014124683.1	Palmitoyltransferase ZDHHC7	-0.245321	0.423456	-0.764461	9.17287e-06	-0.683223	6.45482e-05	-1.03163	3.15894e-05	-0.867641	3.59198e-05
850	Ssa#XM_014124690.1	Proteasome subunit alpha type-1	0.225823	0.433272	0.949588	8.22642e-05	0.616759	0.094363	1.01362	0.00110484	0.842578	0.0488171
851	Ssa#XM_014124699.1	protein phosphatase 1 regulatory subunit 15A-like	0.758978	0.0299386	0.425662	0.0638836	0.935305	0.0083408	0.868563	0.00886642	0.491475	0.0625968
852	Ssa#XM_014124701.1	40S ribosomal protein S13	0.407087	0.10405	0.829155	4.7184e-06	0.903325	1.55648e-05	0.991236	4.34033e-05	0.637328	0.00039964
853	Ssa#XM_014124710.1	Thymine-DNA glycosylase	0.774871	0.133721	0.646796	0.0196202	0.832993	0.0127611	0.909667	0.00307461	0.419748	0.09575
854	Ssa#XM_014124713.1	Major facilitator superfamily domain-containing protein 3	0.322175	0.176817	0.742082	0.00232149	0.398376	0.144659	0.78795	0.0094373	0.837387	0.00688823
855	Ssa#XM_014124726.1	Hyaluronan and proteoglycan link protein 3	-0.811602	0.323805	-1.77744	6.7396e-05	-1.90921	0.00154142	-2.32682	0.000719149	-2.38041	0.0014538
856	Ssa#XM_014124796.1	Chromodomain-helicase-DNA-binding protein 1	0.363751	0.275607	0.905741	0.00245538	0.998493	0.00257525	0.489552	0.0854462	0.332893	0.159031
857	Ssa#XM_014124802.1	nuclear receptor ROR-alpha	-0.950762	0.0213911	-1.13193	0.00338312	-1.27301	0.00257784	-1.20441	0.0083444	-1.07781	0.00860369
858	Ssa#XM_014124809.1	Tetratricopeptide repeat protein 28	-0.626637	0.128803	-0.707113	0.0270254	-0.807425	0.0347217	-0.729749	0.053403	-0.873843	0.0266724
859	Ssa#XM_014124810.1	Serine beta-lactamase-like protein LACTB, mitochondrial	-0.239404	0.511855	0.681299	0.0314322	0.984253	0.00858157	0.360212	0.341717	0.524967	0.173257
860	Ssa#XM_014124831.1	Sodium/nucleoside cotransporter 2	1.00451	0.0435137	0.409501	0.00864743	-0.00797556	0.952845	-0.148236	0.25683	0.0602879	0.700118
861	Ssa#XM_014124834.1	Mucosa-associated lymphoid tissue lymphoma translo	0.849924	0.122532	1.15592	0.00236262	1.05698	0.00725518	0.783241	0.0834091	0.305965	0.41624
862	Ssa#XM_014124845.1	Ras protein-specific guanine nucleotide-releasing factor 2b	-0.650693	0.118669	-1.05501	0.00540256	-1.09967	0.0113043	-1.3547	0.00858487	-1.16453	0.0161689
863	Ssa#XM_014124848.1	Serine/threonine-protein kinase WNK2	1.04788	0.0175013	0.947065	0.000139943	0.667795	0.124926	-0.00525935	0.98293	-0.470064	0.00952043
864	Ssa#XM_014124858.1	ADP-ribosylation factor 5	-0.599182	0.022038	-0.896625	8.87113e-05	-1.16447	6.87146e-05	-0.972652	0.0010152	-0.538811	0.00825383
865	Ssa#XM_014124886.1	Synaptotagmin XI - Ident 30	0.245396	0.0298946	0.576116	0.004144	1.33887	0.00106009	0.327718	0.0161566	0.189798	0.0560607
866	Ssa#XM_014124915.1	Voltage-dependent calcium channel subunit alpha-2/	0.923024	0.0160508	0.939819	0.00156428	1.06629	0.00150406	1.37799	0.00229464	0.551875	0.0958389
867	Ssa#XM_014124948.1	E3 ubiquitin-protein ligase RING2	-1.7588	0.107342	-3.13097	0.00250201	-3.24626	0.00695565	-2.54652	0.00770155	-2.27887	0.00986208
868	Ssa#XM_014124960.1	zona pellucida sperm-binding protein 3	-0.61326	0.00463811	-0.886998	9.37315e-05	-1.3885	0.0112128	-0.81417	0.00137129	-0.887849	0.00165742
869	Ssa#XM_014124962.1	Carnitine palmitoyltransferase 1B (Muscle) - Ident 97	1.3464	0.000623578	1.07457	0.0183606	1.66966	0.000650023	1.29244	0.00292594	0.838083	0.0515312
870	Ssa#XM_014124978.1	kielin/chordin-like protein	-0.330399	0.20473	-0.656803	0.00197844	-0.391819	0.106625	-0.977438	0.00106995	-1.27109	0.000303782
871	Ssa#XM_014124984.1	DnaJ	0.30625	0.277143	0.766305	0.00135225	0.925786	0.00127208	0.552265	0.0509234	0.432265	0.0669875
872	Ssa#XM_014124985.1	adrenomedullin 2	-0.389373	0.175315	1.20515	0.0282495	1.76646	0.0135368	1.50562	0.00350315	0.61766	0.131409
873	Ssa#XM_014124990.1	Lipase maturation factor 2	-0.163629	0.577175	-1.0593	0.000870176	-1.54658	0.000450667	-1.53029	0.000833895	-1.02178	0.00433165
874	Ssa#XM_014124992.1	Inositol oxygenase	-0.209693	0.555146	0.370649	0.137319	0.834409	0.0369721	1.03347	0.01311	0.0934645	0.763072
875	Ssa#XM_014125023.1	Vitelline envelope protein beta	0.932282	0.0196688	0.586476	0.0801878	0.661104	0.0723571	0.64337	0.100317	0.162673	0.723427
876	Ssa#XM_014125045.1	Protein BANP	-0.461801	0.0983919	-0.360417	0.222371	-0.354766	0.283107	-0.800114	0.0188143	-0.608464	0.0334021
877	Ssa#XM_014125054.1	F-box only protein 31	-0.243664	0.415719	-0.950792	0.00424335	-1.03514	0.00440356	-1.69717	0.00100466	-1.4655	0.00202576
878	Ssa#XM_014125133.1	LDLRAD3 protein; Low-density lipoprotein receptor	-0.144139	0.685578	-0.624514	0.0122963	-0.709601	0.0290232	-0.743709	0.0350522	-0.860227	0.00691362
879	Ssa#XM_014125148.1	Ras association (RalGDS/AF-6) domain family 8 - Ident 49	1.08949	0.00131535	1.16945	0.000290357	1.49861	3.11886e-05	1.23264	0.000149823	1.06719	0.000759406
880	Ssa#XM_014125150.1	leucine rich repeat containing 56	0.886767	0.259408	1.39583	0.00140905	1.46661	0.00196477	1.21746	0.0518083	1.40668	0.0257651
881	Ssa#XM_014125179.1	oocyte zinc finger protein XlCOF19-like	0.471425	0.16267	0.831327	0.000859012	1.11379	0.00105579	1.23103	0.00076035	0.819402	0.00670889
882	Ssa#XM_014125186.1	Adducin 1	-0.70074	0.0970532	-1.23607	3.56419e-06	-1.37328	4.17899e-05	-1.31284	0.000292815	-1.32736	5.55898e-05
883	Ssa#XM_014125216.1	G1/S-specific cyclin-D2-like	0.253393	0.209597	0.670022	8.89655e-05	0.848011	0.000645438	0.877082	0.000134955	0.490753	0.000385544
884	Ssa#XM_014125242.1	RIB43A-like with coiled-coils protein 2	-0.615479	0.154683	-0.769772	0.0692463	-1.08732	0.0272033	-0.810672	0.133247	-0.513858	0.325697
885	Ssa#XM_014125253.1	Protein KIAA1147	-0.582865	0.0892984	-0.914623	0.000892496	-1.16852	0.00052417	-1.3703	0.00145353	-1.23651	0.000222801
886	Ssa#XM_014125291.1	Transmembrane protein 38A	-0.0672893	0.845255	-1.16088	0.000254001	-1.22617	0.000109607	-0.898685	0.00624884	-0.6732	0.0175998
887	Ssa#XM_014125295.1	Microtubule associated monooxygenase, calponin and LIM domain containing 3a	-0.969579	0.13569	-1.14349	0.027156	-0.996104	0.110516	-0.237747	0.702017	-1.32647	0.0289634
888	Ssa#XM_014125338.1	Teashirt zinc finger homeobox 3b	0.282687	0.314184	0.802175	0.0463343	0.308002	0.370914	0.350902	0.249529	0.629241	0.0594813
889	Ssa#XM_014125348.1	Selenoprotein O	-0.480373	0.0993543	-0.898202	0.0102835	-0.885702	0.00192053	-1.91348	8.701e-05	-1.34618	0.00116084
890	Ssa#XM_014125353.1	Cryptochrome 1b	0.0283198	0.946269	0.716747	0.0261115	0.87315	0.0100816	0.349001	0.279137	0.29087	0.343571
891	Ssa#XM_014125355.1	mTERF domain-containing protein 3, mitochondrial	-1.25741	0.000804441	-0.727199	0.00922282	-1.31548	0.000784627	-0.534008	0.0920303	-0.477657	0.0945504
892	Ssa#XM_014125367.1	Liprin-beta-1	-0.251015	0.582568	-0.629355	8.37529e-06	-0.771973	7.68687e-05	-0.589275	0.00405055	-0.921074	3.86837e-05
893	Ssa#XM_014125392.1	Inositol 1,4,5-triphosphate receptor, type 2	0.0084934	0.966489	-0.514813	0.0100211	-0.884151	0.00161524	-0.753713	0.0085559	-0.624442	0.0210119
894	Ssa#XM_014125394.1	Ras association	-0.26324	0.546809	-0.416235	0.205248	-0.53205	0.124522	-1.01243	0.0378742	-0.901076	0.0396088
895	Ssa#XM_014125400.1	melan-A	-0.648094	0.337674	-1.05213	0.00661984	-0.956669	0.0241585	-1.26532	0.00782478	-1.2766	0.00871582
896	Ssa#XM_014125405.1	zinc finger protein 2 homolog	0.724702	0.100931	0.798508	0.0454042	1.04898	0.035155	0.995997	0.0680722	1.19046	0.0261728
897	Ssa#XM_014125407.1	Endoplasmic reticulum metallopeptidase 1	-0.772306	0.119967	-1.14537	0.00118243	-1.48775	0.00259444	-0.968835	0.0148165	-1.42458	0.00940225
898	Ssa#XM_014125412.1	Cyclic nucleotide gated channel beta 1a	0.495734	0.351281	0.803015	0.00342752	0.499278	0.0466037	0.187728	0.497936	-0.188755	0.296079
899	Ssa#XM_014125425.1	Polypeptide N-acetylgalactosaminyltransferase 18	-1.47159	0.105237	-1.19979	0.138284	-1.77515	0.046182	-1.20173	0.271846	0.0698715	0.932022
900	Ssa#XM_014125442.1	Ras association (RalGDS/AF-6) domain family 8 - Ident 25	-0.163579	0.563773	-0.552809	0.036123	-0.506345	0.090126	-0.823286	0.013299	-0.985925	0.0053644
901	Ssa#XM_014125467.1	Fish virus induced TRIM-7	0.581498	0.0166667	0.671724	9.33388e-05	1.19749	4.55128e-05	0.674074	0.00635245	0.441246	0.00611014
902	Ssa#XM_014125468.1	Fish virus induced TRIM-7	0.618975	0.00980325	0.804432	1.97602e-05	1.44997	3.05198e-05	0.778486	0.00119195	0.325823	0.0432945
903	Ssa#XM_014125491.1	Janus kinase 2a	0.984212	0.12484	1.73485	3.93814e-06	1.30636	0.00252026	0.667549	0.177155	-0.0492043	0.778971
904	Ssa#XM_014125524.1	DnaJ	-0.173551	0.568754	0.483429	0.102185	0.32433	0.407628	1.01477	0.0179851	0.9259	0.0261292
905	Ssa#XM_014125556.1	laminin subunit beta-4-like	1.554	0.0238414	1.28731	0.000353273	2.16491	6.0235e-05	1.18609	0.00750676	-0.213558	0.507689
906	Ssa#XM_014125560.1	Transmembrane protein 168	-0.883645	0.00573629	-0.219282	0.269171	-0.818692	0.00138282	-0.550084	0.0366647	-0.591046	0.028862
907	Ssa#XM_014125562.1	Zinc finger protein 277	-0.82598	0.0188766	-0.739495	0.0132925	-1.0246	0.00273672	-0.509175	0.111894	-0.277687	0.330898
908	Ssa#XM_014125574.1	Alpha-1-microglobulin	-0.7869	0.141379	-1.48019	5.3773e-06	-1.56352	8.38861e-06	-1.61744	7.55409e-05	-1.40075	4.82907e-05
909	Ssa#XM_014125580.1	Retinoblastoma-like protein 2	0.707958	0.173478	0.960226	0.00319449	1.11532	0.00327245	0.732526	0.0535083	0.645008	0.179777
910	Ssa#XM_014125588.1	Glucose phosphate isomerase b	-0.840809	0.00634872	-1.0119	3.94933e-05	-1.13223	0.000210955	-0.790678	0.01132	-0.175488	0.380438
911	Ssa#XM_014125644.1	Hepatocyte growth factor receptor	0.237222	0.166738	0.926099	6.90096e-05	1.36539	8.35381e-07	0.692823	0.00329469	0.0319424	0.764936
912	Ssa#XM_014125673.1	Eukaryotic translation initiation factor 4, gamma 2a	-0.461317	0.0324238	-0.332128	0.0275148	-0.80083	2.28074e-05	-0.438107	0.0650052	-0.2852	0.0401588
913	Ssa#XM_014125675.1	Fish virus induced TRIM-11	0.642473	0.0341653	0.840359	0.000881241	1.32698	3.27799e-06	0.710003	0.00878073	0.441074	0.0247604
914	Ssa#XM_014125684.1	Mitochondrial inner membrane protease subunit 2	1.47101	0.0104791	0.215146	0.55162	0.269734	0.486148	-0.518434	0.100345	-0.577945	0.0784704
915	Ssa#XM_014125697.1	Ras association (RalGDS/AF-6) domain family 8 - Ident 29	0.481602	0.0079001	0.844337	1.0827e-05	0.965301	3.75587e-05	1.05988	0.000126847	0.594387	0.000223073
916	Ssa#XM_014125713.1	Proton myo-inositol cotransporter	-0.226475	0.320165	-0.621359	0.0115171	-1.03095	0.000982022	-0.414352	0.126175	-0.439253	0.118031
917	Ssa#XM_014125721.1	Aurora kinase B	-0.575125	0.0596221	0.0577113	0.788062	0.960256	0.00790327	-0.162576	0.680664	0.505784	0.0500153
918	Ssa#XM_014125726.1	C-Jun-amino-terminal kinase-interacting protein 2	0.318872	0.611679	0.063344	0.90745	-0.265922	0.659008	-1.75664	0.0297423	-0.953394	0.240254
919	Ssa#XM_014125748.1	MAP7 domain-containing protein 2-like	0.598996	0.350964	0.892577	0.014716	0.808426	0.0851092	0.12561	0.838267	-0.379667	0.278011
920	Ssa#XM_014125783.1	Contactin 1b	0.595006	0.0185778	-0.231197	0.089162	-0.329256	0.0209685	-0.15985	0.287064	-1.29751	0.000458311
921	Ssa#XM_014125803.1	Bisphosphoglycerate mutase	1.6899	0.0368169	3.15551	8.6657e-09	2.7324	4.58548e-05	1.85054	0.000738358	1.20987	0.000267386
922	Ssa#XM_014125806.1	DnaJ homolog subfamily B member 9	-1.07779	0.0161905	-0.503291	0.152185	-0.6347	0.0720691	-0.919401	0.100751	-0.345091	0.521969
923	Ssa#XM_014125832.1	Ankyrin repeat and SOCS box-containing 13a, tandem duplicate 1	0.410378	0.222689	1.10789	0.00116743	1.24609	0.00133894	0.857548	0.0379076	0.708076	0.041803
924	Ssa#XM_014125835.1	calphotin-like	0.193529	0.143141	-0.512353	0.0117659	-0.580481	0.00193434	-0.86983	0.000270507	-0.513713	0.00255986
925	Ssa#XM_014125838.1	UDP-xylose and UDP-N-acetylglucosamine transporter	-0.590844	0.0457399	-1.11215	1.29926e-05	-1.16868	0.000107404	-0.902743	0.000466883	-0.481113	0.0477829
926	Ssa#XM_014125840.1	Golgi transport 1Bb	-0.038846	0.93062	-0.586784	0.179715	-1.19984	0.0186951	-0.85123	0.0995413	0.00672451	0.98918
927	Ssa#XM_014125857.1	Potassium voltage-gated channel subfamily A member 7	-0.442692	0.494991	-0.83786	0.0494232	-0.64759	0.174402	-0.651615	0.218263	-0.569985	0.254709
928	Ssa#XM_014125859.1	flocculation protein FLO11-like	-0.751579	0.155689	-0.794795	0.0480239	-0.94259	0.037591	-1.06235	0.0403745	-1.20095	0.00963545
929	Ssa#XM_014125862.1	ETS domain-containing protein Elk-3	0.292849	0.191641	0.284094	0.133258	0.469508	0.0555103	1.01406	0.00109331	0.464265	0.0496799
930	Ssa#XM_014125863.1	Histidine ammonia-lyase	0.951366	0.0262139	1.35136	2.51633e-05	1.63272	2.41665e-05	1.19293	0.000829813	1.0344	0.00287338
931	Ssa#XM_014125870.1	Nuclear receptor subfamily 2, group C, member 2	0.382194	0.362493	0.996424	0.00743346	0.779915	0.0465516	0.709423	0.113241	0.312447	0.450774
932	Ssa#XM_014125917.1	HMG box-containing protein 1	1.17189	0.0337493	0.602624	0.101966	1.15765	0.000887797	-0.038515	0.89581	-0.76041	0.119154
933	Ssa#XM_014125922.1	extensin-like	-1.26256	0.177818	-1.52405	0.000413137	-1.79082	0.000675007	-1.70349	0.0059941	-2.20326	0.000469785
934	Ssa#XM_014125934.1	LIM homeobox 6	-0.917444	0.343092	-2.23866	8.83702e-05	-2.21384	0.000330615	-2.17816	0.00127861	-2.17501	0.00126757
935	Ssa#XM_014125960.1	reelin-like	1.02268	0.118357	1.18781	0.000497777	1.49844	0.00468051	0.945226	0.0214909	1.35278	6.3399e-05
936	Ssa#XM_014125988.1	eukaryotic translation initiation factor 3 subunit J-A-like	-0.125902	0.754156	0.374859	0.0637822	0.157422	0.42697	0.822128	0.013044	0.681537	0.00559918
937	Ssa#XM_014126004.1	anthrax toxin receptor 2-like	-0.390502	0.202622	-0.773978	0.00355485	-0.998993	0.00186788	-1.20419	0.00412241	-0.91925	0.00939828
938	Ssa#XM_014126022.1	Protein regulator of cytokinesis 1	-0.610223	0.0451472	0.141951	0.557444	0.927766	0.0108863	-0.196476	0.612558	0.273584	0.364087
939	Ssa#XM_014126093.1	Golgi phosphoprotein 3-like	0.295839	0.54202	0.775437	0.0392017	0.790959	0.018496	0.883148	0.0561449	1.12583	0.00653593
940	Ssa#XM_014126096.1	Parkinson disease 7 domain-containing protein 1	0.354903	0.23414	0.762851	0.00444762	0.96927	0.00145183	0.936874	0.00671615	0.429592	0.188449
941	Ssa#XM_014126110.1	Cytochrome P450, subfamily XIA, polypeptide 1	0.796047	0.012514	1.17179	1.64227e-05	0.928478	0.00198731	0.490218	0.0238164	0.348605	0.0217701
942	Ssa#XM_014126118.1	Lipid phosphate phosphohydrolase 1	-0.141957	0.449864	-1.48891	3.43315e-07	-0.983506	0.000479632	-0.93922	0.000422804	-1.01077	0.00107098
943	Ssa#XM_014126124.1	von Willebrand factor-like	1.93712	0.0153449	2.06527	0.000417798	1.96461	0.000168616	1.28335	0.00751074	1.13907	0.0224418
944	Ssa#XM_014126142.1	Nucleoredoxin-like protein 2	0.477338	0.0749145	0.738709	0.00880378	1.05357	0.0113613	1.2189	0.00811716	0.418944	0.163297
945	Ssa#XM_014126156.1	Glyoxalase 1	-0.662911	0.0358054	-0.79981	0.000144369	-0.932358	0.000781218	-0.561809	0.0216512	-0.501236	0.0216499
946	Ssa#XM_014126192.1	Glycine N-methyltransferase	0.671626	0.114626	0.588977	0.0807332	0.830972	0.0160963	0.201633	0.505682	-0.138492	0.621254
947	Ssa#XM_014126193.1	Glycoprotein endo-alpha-1,2-mannosidase-like protein	0.61338	0.0323365	0.490465	0.0476127	1.12898	0.00172913	0.589457	0.121351	0.378867	0.276033
948	Ssa#XM_014126197.1	GTPase IMAP family member 7	0.479207	0.178971	0.909873	0.00062457	0.870368	0.00507231	0.689915	0.0414106	0.547866	0.0416303
949	Ssa#XM_014126233.1	NEL-like 1	0.200204	0.828218	-0.2744	0.524211	-0.37385	0.504076	-1.0632	0.0437041	-1.16376	0.0277926
950	Ssa#XM_014126274.1	Kinesin family member C3	0.895082	0.0807722	-0.242825	0.394585	0.0661056	0.810402	-0.654172	0.114035	-0.917181	0.0124321
951	Ssa#XM_014126284.1	Katanin p80 WD40 repeat-containing subunit B1	0.251477	0.268296	0.504627	0.0446729	0.901233	0.00402611	0.371188	0.179148	-0.0266576	0.937858
952	Ssa#XM_014126318.1	Transcription factor E2F8	-1.122	0.0309946	-1.0743	0.018467	-1.47451	0.0176238	-0.889423	0.0319853	-0.424398	0.128152
953	Ssa#XM_014126353.1	MAP kinase-activating death domain protein	0.109933	0.68616	0.551899	0.00823215	0.862675	0.00793379	0.711642	0.0081523	0.0805852	0.595124
954	Ssa#XM_014126366.1	Fin bud initiation factor b	-0.217513	0.472305	0.112628	0.669988	0.980349	0.0153172	0.728111	0.092349	-0.0569466	0.862552
955	Ssa#XM_014126401.1	Prostatic acid phosphatase	0.384397	0.230389	0.196653	0.378666	0.923975	0.00314741	-0.499232	0.117665	-0.696649	0.0313698
956	Ssa#XM_014126406.1	Activating molecule in BECN1-regulated autophagy protein 1	-0.435702	0.387931	-1.64959	0.000969313	-1.29971	0.0104297	-0.969364	0.0297288	-1.55351	0.014873
957	Ssa#XM_014126439.1	Cathepsin L1	1.13662	0.192278	1.77228	0.0131178	2.19781	0.0162059	2.14847	0.0188243	2.10866	0.0201668
958	Ssa#XM_014126445.1	autophagy-related protein 13	-0.00136556	0.99675	-0.60101	0.0326902	-0.501128	0.0935602	-0.800436	0.0329358	-0.751925	0.0348955
959	Ssa#XM_014126453.1	cathepsin S-like	0.595361	0.34052	0.734609	0.104815	1.33614	0.0189559	1.01086	0.124769	1.02346	0.0871977
960	Ssa#XM_014126458.1	Proteasome	-0.812713	0.0351799	0.226741	0.240238	-0.0225652	0.94156	0.490843	0.0397011	0.326244	0.159648
961	Ssa#XM_014126461.1	FAS-associated death domain protein-like	0.279032	0.568846	0.795669	0.0176456	0.572732	0.0925896	0.818625	0.0484215	0.969644	0.0266251
962	Ssa#XM_014126463.1	Cathepsin L1	0.811199	0.149196	1.54629	0.00437721	2.07141	0.00343635	1.76991	8.97022e-05	1.55428	0.0101144
963	Ssa#XM_014126486.1	Ribonucleases P/MRP protein subunit POP1	0.78086	0.0585791	1.13537	0.000435841	0.921273	0.0111627	0.588114	0.0957847	0.227807	0.415574
964	Ssa#XM_014126489.1	Cathepsin L1	0.936281	0.237013	1.38477	0.0305439	1.97731	0.0125035	1.72041	0.046313	1.71017	0.03291
965	Ssa#XM_014126502.1	Fructose-1,6-bisphosphatase 2	-0.331569	0.23321	-1.16837	0.00169121	-0.795284	0.0748619	-2.49348	8.58413e-05	-2.17571	0.000305414
966	Ssa#XM_014126507.1	T-cell immunomodulatory protein	0.0317297	0.96303	0.92781	0.000297775	1.13382	0.000154946	0.924318	0.00224933	0.871018	0.00185261
967	Ssa#XM_014126520.1	SHC SH2 domain-binding protein 1	-1.15531	0.000119785	-0.770712	0.00457666	-0.117412	0.62998	-1.07532	0.0386049	-0.714933	0.0348536
968	Ssa#XM_014126524.1	BCL2/adenovirus E1B 19 kDa protein-interacting protein 3-like	1.77345	0.00126766	0.545171	0.179308	1.28397	0.0101092	-1.89972	0.0107563	-1.97245	0.00678208
969	Ssa#XM_014126548.1	Ras association (RalGDS/AF-6) domain family 8 - Ident 49	-1.46271	0.0038509	-1.82558	5.49501e-05	-1.90469	0.00015395	-1.77367	0.000694709	-1.8904	0.000443046
970	Ssa#XM_014126551.1	Protein FAM196A	0.536345	0.20648	0.260709	0.412977	0.43712	0.137954	0.372494	0.416765	0.848892	0.0225787
971	Ssa#XM_014126555.1	Guanine nucleotide binding protein	-0.34991	0.098902	-0.890996	1.45904e-06	-0.811431	0.000138791	-0.706618	0.000362971	-0.581313	0.00169924
972	Ssa#XM_014126574.1	Guanine nucleotide binding protein	0.199762	0.418325	0.696547	0.0171608	0.547454	0.0450749	0.807273	0.0443883	1.49439	0.0197991
973	Ssa#XM_014126592.1	Two pore calcium channel protein 2	0.776493	0.0229016	1.1975	0.000219784	1.59554	1.10015e-05	0.925438	0.00413837	0.396056	0.0864556
974	Ssa#XM_014126597.1	7-dehydrocholesterol reductase	-0.70271	0.00200292	-0.430036	0.110236	-0.678852	0.0148247	-0.913656	0.000470341	-0.809865	0.00523547
975	Ssa#XM_014126657.1	Glycine cleavage system protein H	-0.560738	0.0855284	-0.948496	0.00347452	-0.791088	0.0162409	-0.833609	0.0433603	-0.657729	0.0526969
976	Ssa#XM_014126658.1	Lysine--tRNA ligase	0.0148269	0.940091	0.216785	0.103816	0.320829	0.0539052	0.666967	0.0200512	0.885752	0.00101814
977	Ssa#XM_014126727.1	Ribonuclease P/MRP 25 subunit-like	0.543023	0.104992	0.87118	0.000941214	0.929666	0.00339408	0.633311	0.0796573	1.18352	0.00328765
978	Ssa#XM_014126758.1	Cholinergic receptor_ nicotinic_ beta polypeptide 3b	0.473961	0.283765	1.22322	0.000629822	0.906414	0.0235399	1.40423	0.00633175	1.03811	0.0256392
979	Ssa#XM_014126770.1	E3 ubiquitin-protein ligase Praja-1	0.486631	0.0540869	0.660686	4.17884e-05	0.806249	4.91595e-05	0.483321	0.00519375	0.273463	0.122587
980	Ssa#XM_014126786.1	CD276 antigen	-1.12612	0.255729	-2.48054	0.000178753	-2.4087	0.000660828	-2.41139	0.00201216	-2.42644	0.00217166
981	Ssa#XM_014126857.1	Protein CBFA2T2	-0.634176	0.378539	-1.32231	0.000265404	-1.43422	0.000408456	-1.44018	0.00105035	-1.38732	0.00177315
982	Ssa#XM_014126885.1	Mucin-5B	-0.394031	0.470058	-0.892831	0.0544338	-1.02679	0.0469081	-1.11331	0.0590203	-1.16163	0.0511732
983	Ssa#XM_014126897.1	GRINL1A combined protein 15; Protein GCOM1	0.0885731	0.559367	0.215159	0.0619057	1.12608	0.000420109	0.235251	0.129378	0.0382936	0.770316
984	Ssa#XM_014126900.1	Aquaporin 3a	-0.0486582	0.759035	-0.257201	0.130757	-0.535482	0.017364	-1.0013	0.0027809	-1.10438	0.000300672
985	Ssa#XM_014126908.1	E3 ubiquitin-protein ligase TRIM23	-0.623785	0.121337	-0.33567	0.319345	-0.840703	0.0209313	-0.253018	0.47761	-0.131865	0.695688
986	Ssa#XM_014126939.1	1,4-alpha-glucan-branching enzyme	-0.0701994	0.733123	0.381474	0.266857	0.0127438	0.949858	1.43454	0.0066892	1.08346	0.285983
987	Ssa#XM_014126940.1	Neural precursor cell expressed, developmentally down-regulated 4-like	0.300595	0.564009	0.805054	0.018665	0.916715	0.0173188	1.33265	0.0109255	1.24273	0.0094207
988	Ssa#XM_014126946.1	SREK1-interacting protein 1	0.599492	0.326149	0.914822	0.0163235	1.10573	0.0150512	1.27482	0.016729	1.32997	0.0132207
989	Ssa#XM_014126951.1	Probable ribosome biogenesis protein RLP24	0.269727	0.234019	0.382669	0.0902385	0.607264	0.0198731	0.937092	0.00628216	0.860857	0.00776942
990	Ssa#XM_014126959.1	Cleavage and polyadenylation specificity factor subunit 5	0.248421	0.734854	1.13944	0.00987117	1.1662	0.0146869	1.22299	0.0208626	1.30673	0.0167736
991	Ssa#XM_014126988.1	neuritin-like protein	-0.569872	0.113922	-0.955671	0.00901322	-0.98596	0.00376658	-0.88188	0.0266653	-0.768179	0.028584
992	Ssa#XM_014127025.1	Calbindin 1	1.37476	0.0944751	2.26769	0.00944448	2.06794	0.0132729	1.4092	0.0683091	0.632795	0.473687
993	Ssa#XM_014127026.1	cytochrome P450 2C8-like	1.02413	0.0107347	0.120003	0.523188	0.31808	0.0516232	0.641429	0.016018	-0.0736518	0.649676
994	Ssa#XM_014127044.1	Cytochrome b-245 light chain	-0.468399	0.0445633	-0.711904	0.00383633	-0.955836	0.00141426	-0.491151	0.0293732	-0.0873378	0.671156
995	Ssa#XM_014127057.1	Sec31 homolog A	-0.780988	0.0117357	-1.77207	4.21363e-05	-3.01727	1.18617e-07	-1.61127	0.00160877	-0.898443	0.00228412
996	Ssa#XM_014127069.1	ER membrane protein complex subunit 8	-1.11107	0.0160754	-0.352129	0.322179	-0.275228	0.4672	0.0428902	0.9175	-0.201774	0.607677
997	Ssa#XM_014127122.1	Sn1-specific diacylglycerol lipase alpha	-0.206753	0.801574	-1.09946	0.023515	-1.09493	0.0565867	-1.28063	0.0303518	-1.53142	0.0260424
998	Ssa#XM_014127128.1	succinate dehydrogenase assembly factor 2, mitochondrial-like	0.606148	0.230861	0.970656	0.0424699	1.23957	0.0174007	1.09448	0.068861	1.3475	0.0277553
999	Ssa#XM_014127147.1	vitamin D 25-hydroxylase-like	-0.0977788	0.573576	0.54322	0.0264875	0.882441	0.00253974	0.970747	0.0240809	0.682936	0.0105894
1000	Ssa#XM_014127158.1	ras-related protein R-Ras2-like	0.901384	0.0136834	1.16918	0.00051956	1.68482	2.08216e-05	0.907301	0.0112586	0.282384	0.443572
1001	Ssa#XM_014127175.1	tyrosine-protein kinase CSK	0.00426054	0.984369	0.578871	0.00996574	0.337573	0.0860132	0.690249	0.0276045	0.916927	0.0081131
1002	Ssa#XM_014127181.1	collagen and calcium-binding EGF domain-containing protein 1-like	0.0536017	0.894816	-0.515406	0.0370751	-0.656685	0.0507913	-0.658855	0.0232592	-0.820903	0.000700231
1003	Ssa#XM_014127184.1	Importin 7	0.227092	0.632315	0.891444	0.0620871	0.942268	0.0699366	1.3514	0.034748	0.756013	0.19447
1004	Ssa#XM_014127190.1	heterogeneous nuclear ribonucleoprotein D-like	0.249251	0.428056	0.462632	0.0292624	0.25213	0.186466	0.651621	0.0489115	1.03904	0.00168753
1005	Ssa#XM_014127233.1	Glucose phosphate isomerase b	0.0864862	0.809022	0.0387412	0.891725	0.006135	0.987379	0.541901	0.240389	1.2344	0.00720934
1006	Ssa#XM_014127236.1	HEAT repeat-containing protein 3	-0.355701	0.441064	0.757191	0.06793	0.352187	0.30685	1.06835	0.0354617	1.02095	0.0536715
1007	Ssa#XM_014127237.1	arylamine N-acetyltransferase, pineal gland isozyme NAT-10-like	0.801286	0.0388169	2.07187	2.40694e-05	2.60214	1.78373e-05	2.13651	0.000791274	0.44774	0.197723
1008	Ssa#XM_014127238.1	non-canonical poly(A) RNA polymerase PAPD5-like (LOC106562382)	0.266706	0.601512	1.28784	0.00334542	1.66437	0.000879021	1.19429	0.0140968	0.773348	0.0669618
1009	Ssa#XM_014127244.1	Bromodomain-containing protein 7	-0.185796	0.440654	0.703749	0.000147276	0.975178	9.54614e-05	0.609793	0.0026671	0.446871	0.00563214
1010	Ssa#XM_014127254.1	Transcription initiation factor TFIID subunit 4	-0.395173	0.529828	-0.799856	0.0580743	-0.816152	0.0560772	-1.01581	0.0499565	-1.17127	0.0410984
1011	Ssa#XM_014127261.1	TOX high mobility group box family member 3-like	0.24089	0.407424	0.443977	0.0907198	0.331587	0.160848	0.655996	0.087983	0.942275	0.00390287
1012	Ssa#XM_014127276.1	Sorting nexin 1a	-0.163221	0.23043	0.203909	0.0960499	0.609117	9.47628e-05	0.902883	9.35211e-05	0.654142	0.000621372
1013	Ssa#XM_014127284.1	Lysophosphatidylcholine acyltransferase 2	0.409576	0.101825	0.958011	2.94789e-05	1.21203	2.2247e-05	0.7436	0.000933193	0.613352	0.000570589
1014	Ssa#XM_014127317.1	Muscle-specific beta 1 integrin binding protein 2	0.147239	0.667601	0.777397	0.00179965	0.882792	0.0032594	1.49753	0.000551504	1.48401	0.000503161
1015	Ssa#XM_014127320.1	cocaine- and amphetamine-regulated transcript protein-like	-0.392543	0.272206	-0.773934	0.00180842	-0.773045	0.00364816	-0.700336	0.0131991	-0.846513	0.00528372
1016	Ssa#XM_014127322.1	electron transfer flavoprotein subunit alpha, mitochondrial-like	-0.0628125	0.867265	0.578849	0.132749	0.742031	0.111547	1.64162	0.00457379	-0.230513	0.691307
1017	Ssa#XM_014127329.1	Pro-cathepsin H	0.0116506	0.979789	0.622373	0.019839	0.772569	0.0106362	0.89038	0.0132829	0.578854	0.052847
1018	Ssa#XM_014127339.1	Alpha-tropomyosin	0.746969	0.146168	1.63035	1.49497e-05	1.25191	0.0026124	0.795815	0.0598125	0.636501	0.0174944
1019	Ssa#XM_014127344.1	COP9 signalosome complex subunit 2	0.232814	0.452628	0.619742	0.0102917	0.70537	0.035143	0.82908	0.0108029	0.936009	0.00923602
1020	Ssa#XM_014127363.1	Tetraspanin 3a	0.288071	0.550356	0.917685	8.18767e-06	1.12507	1.12832e-06	0.730201	0.00016478	0.414368	0.000980176
1021	Ssa#XM_014127379.1	A disintegrin and metalloproteinase with thrombospondin motifs 17-like	0.115477	0.622181	0.362811	0.0184707	0.267047	0.13929	0.724311	0.00105356	1.03286	0.0114945
1022	Ssa#XM_014127390.1	Abhydrolase domain containing 2a	-0.252574	0.537169	-0.671136	0.00578672	-0.706989	0.00286715	-0.797357	0.00544454	-0.88521	0.00165871
1023	Ssa#XM_014127403.1	Guanine nucleotide binding protein	0.558698	0.160902	-0.683003	0.0701501	0.594619	0.062807	-1.62471	0.00107533	-1.83976	0.000553928
1024	Ssa#XM_014127417.1	Spermatogenesis-associated protein 5-like protein	0.351261	0.429784	0.555836	0.0482247	0.965786	0.00910446	0.889961	0.0140307	0.487873	0.140602
1025	Ssa#XM_014127421.1	Sodium/potassium/calcium exchanger 5	0.7656	0.0396849	0.792729	0.0374626	0.869014	0.00152499	1.0028	0.000208169	0.827865	0.000684356
1026	Ssa#XM_014127433.1	IQ motif containing GTPase activating protein 2	-0.807757	0.0476408	-0.45258	0.205129	-1.3742	0.0017484	-2.07467	0.000918681	-1.03364	0.0325058
1027	Ssa#XM_014127434.1	gastrula zinc finger protein XlCGF7.1-like	0.334727	0.500713	0.985071	0.000372261	1.13296	0.000551632	1.19641	0.00101153	0.9275	0.00985721
1028	Ssa#XM_014127438.1	Tumor suppressor p53-binding protein 1	0.281671	0.511045	0.862697	0.00194155	0.738323	0.0147436	0.39651	0.16749	0.430521	0.102913
1029	Ssa#XM_014127479.1	Sodium/potassium/calcium exchanger 5	0.903005	0.0673511	1.5487	1.93671e-05	1.47979	9.24702e-06	1.10203	0.00752954	1.54987	7.35274e-06
1030	Ssa#XM_014127488.1	DmX-like protein 2	-1.13134	0.0617642	-1.74581	2.98197e-05	-2.43393	0.000208819	-1.53599	0.000649896	-1.49593	0.00100554
1031	Ssa#XM_014127489.1	deoxyuridine triphosphatase (dut), X1	-0.805145	0.00141605	-0.63614	0.0016715	-0.0316415	0.840917	-0.064056	0.786127	0.324438	0.120875
1032	Ssa#XM_014127519.1	Unknown	0.956083	0.0255531	0.635064	0.0694561	1.33758	0.00154426	0.592949	0.147839	0.329422	0.345461
1033	Ssa#XM_014127525.1	apolipoprotein A-IV-like	0.0901484	0.893765	-0.971442	0.0279801	-0.85385	0.0545352	-0.986361	0.0575709	-0.890503	0.0906644
1034	Ssa#XM_014127541.1	Fumarylacetoacetase	-0.947738	0.00164478	-0.822114	0.00149928	-1.0647	0.000251809	-1.30973	0.000128989	-0.67072	0.0253731
1035	Ssa#XM_014127553.1	CUB and zona pellucida-like domain-containing protein 1	-0.080018	0.781326	-1.80808	0.000587106	-1.66635	0.00346123	-0.825169	0.00320489	-1.24396	0.00372582
1036	Ssa#XM_014127578.1	IQ motif containing GTPase activating protein 2	-0.721274	0.0345751	-0.542951	0.0294348	-0.98945	0.00177029	-1.35038	0.000551666	-0.881317	0.0196563
1037	Ssa#XM_014127581.1	ADAMTS-like protein 5	-0.647425	0.0543962	-1.32871	0.0032925	-1.34588	0.00363657	-1.49183	0.0113353	-1.08097	0.00504906
1038	Ssa#XM_014127601.1	Programmed cell death protein 7	0.581754	0.040491	0.669497	0.0103966	0.885135	0.00424249	1.00789	0.00635096	0.762472	0.0234947
1039	Ssa#XM_014127681.1	Cysteine--tRNA ligase, cytoplasmic	-0.247601	0.219388	-0.412426	0.00938764	-0.440825	0.0293231	0.670543	0.023059	1.09384	0.00176786
1040	Ssa#XM_014127683.1	Coronin, actin binding protein, 2A	-0.796647	0.020164	-1.16271	0.000874722	-1.26656	0.000966727	-1.34991	0.00133656	-1.08069	0.00541707
1041	Ssa#XM_014127733.1	pleckstrin homology domain-containing family O member 2-like (LOC106562597)	0.569897	0.133209	1.26253	0.00111842	1.50536	0.000604438	0.879156	0.00476453	1.08556	0.000733688
1042	Ssa#XM_014127737.1	Hypermethylated in cancer 2 protein	0.141313	0.702749	-0.714427	8.49961e-05	-0.695372	0.00029725	-0.720285	0.00555255	-0.813504	0.000479153
1043	Ssa#XM_014127747.1	Ubiquitin-conjugating enzyme E2L 3a	-0.667446	0.0447469	-0.496367	0.0324789	-0.899806	0.00395492	-0.323	0.300595	0.00371698	0.987221
1044	Ssa#XM_014127754.1	Cystathionine beta-synthase	-0.160604	0.568401	-0.121918	0.63384	0.255737	0.418678	-0.996968	0.0105211	-0.751049	0.056049
1045	Ssa#XM_014127762.1	Splicing factor U2AF 35 kDa subunit	-0.609673	0.0217787	-0.748349	0.00679444	-1.30643	0.000226845	-0.080196	0.770647	0.295733	0.23913
1046	Ssa#XM_014127827.1	FH1/FH2 domain-containing protein 1-like	-0.330109	0.503117	-0.318943	0.221215	-0.478352	0.0999909	-0.617519	0.159115	-0.821037	0.0113202
1047	Ssa#XM_014127846.1	Protein zer-1 homolog	0.404316	0.167798	0.701512	0.00947086	0.726066	0.0373023	0.940323	0.00112246	0.289332	0.0900727
1048	Ssa#XM_014127862.1	Spectrin alpha chain, non-erythrocytic 1	0.0832138	0.798058	-0.152497	0.545903	-0.255267	0.373617	-0.812029	0.0263803	-0.429341	0.181334
1049	Ssa#XM_014127880.1	Protein FAM102A	0.836307	0.0236717	1.39203	0.00141859	1.37363	0.00278594	0.746651	0.0638532	0.534243	0.176139
1050	Ssa#XM_014127890.1	coiled-coil-helix-coiled-coil-helix domain-containing protein 10, mitochondrial-like	-0.325849	0.0828452	-0.0367282	0.777196	-0.0777183	0.604905	0.471375	0.100014	0.884105	0.00023293
1051	Ssa#XM_014127943.1	Scavenger receptor class B member 1	-0.229076	0.606537	-0.742455	0.175919	-1.29362	0.0386177	-0.509026	0.280425	-0.616438	0.0703342
1052	Ssa#XM_014127997.1	28S ribosomal protein S24, mitochondrial-like	0.22308	0.56495	0.447887	0.110276	0.813153	0.0194196	0.598747	0.14365	0.903883	0.0114327
1053	Ssa#XM_014128070.1	Rho guanine nucleotide exchange factor	0.329914	0.526842	-0.744276	0.149392	-1.01301	0.0167424	0.172086	0.660702	-0.347965	0.498937
1054	Ssa#XM_014128074.1	Ectoderm-neural cortex protein 1	-0.165917	0.66237	-0.776723	0.000149083	-0.510074	0.00462044	-0.88338	0.000431152	-0.979382	0.000341977
1055	Ssa#XM_014128153.1	Probable ATP-dependent RNA helicase DDX56	-0.276876	0.358496	0.242828	0.54472	0.0759715	0.817284	0.903085	0.0278823	0.873806	0.0163218
1056	Ssa#XM_014128160.1	Solute carrier family 4, sodium bicarbonate cotransporter, member 5	-0.61024	0.217591	-1.03059	0.00768015	-1.30894	0.0173375	-0.951796	0.0204256	-1.04128	0.00344423
1057	Ssa#XM_014128166.1	Tubulin, alpha 1a	-1.24425	0.000111	-0.830748	0.000864813	-0.233033	0.273967	-1.67805	0.000180914	-0.957047	0.00227193
1058	Ssa#XM_014128176.1	Synaptotagmin binding, cytoplasmic RNA interacting protein, like	0.591224	0.060183	-0.414304	0.0427043	-0.913061	0.00160437	-0.816232	0.0105175	-0.565107	0.0983594
1059	Ssa#XM_014128184.1	uncharacterized protein DDB_G0290521	-1.23411	0.135564	-2.34207	9.73453e-07	-2.21732	7.94873e-07	-2.27986	1.847e-05	-2.69678	1.32021e-05
1060	Ssa#XM_014128203.1	Phosphoinositide-3-kinase, regulatory subunit, polypeptide 2	0.680615	0.14515	1.50594	0.00146714	1.06455	0.0204771	1.12602	0.0338106	0.411924	0.360703
1061	Ssa#XM_014128221.1	phosphatidylserine decarboxylase proenzyme-like	0.564072	0.408759	-0.347559	0.367367	-1.17461	0.00622705	-0.919079	0.0216529	-0.66104	0.122582
1062	Ssa#XM_014128232.1	high affinity copper uptake protein 1-like	0.555696	0.126718	0.280258	0.192506	1.23194	0.000190278	0.974826	0.000754116	0.714348	0.00877168
1063	Ssa#XM_014128241.1	Proteinase-activated receptor 1	0.418582	0.387883	1.15553	3.36675e-06	1.18048	4.48964e-06	1.07229	0.00027429	1.04477	0.000168851
1064	Ssa#XM_014128263.1	Junction mediating and regulatory protein, p53 cofactor	1.32471	0.0257221	0.891197	0.0398147	1.46075	0.000935716	1.05179	0.0127495	0.475555	0.272568
1065	Ssa#XM_014128284.1	stanniocalcin-like	0.528921	0.0714479	0.720598	0.0722002	0.958216	0.000320059	0.668128	0.00930721	0.551713	0.00384249
1066	Ssa#XM_014128286.1	cGMP-dependent protein kinase 1-like	0.509874	0.111777	0.875663	7.8345e-08	0.628069	0.00188422	0.397591	0.0334782	0.262342	0.00159137
1067	Ssa#XM_014128289.1	WD repeat domain phosphoinositide-interacting protein 4	0.266343	0.589166	0.464304	0.131959	0.866375	0.0271113	0.196713	0.569249	0.0747596	0.838797
1068	Ssa#XM_014128292.1	Alpha-2 adrenergic receptor Adra2b	0.492737	0.335999	0.946367	0.00457431	0.856598	0.0316274	0.933147	0.0083077	0.440611	0.138529
1069	Ssa#XM_014128293.1	zinc finger, CCHC domain containing 9	0.266837	0.253794	0.62555	0.00752779	0.443709	0.0647882	0.810708	0.0215728	0.812035	0.0109316
1070	Ssa#XM_014128302.1	Myocyte enhancer factor 2cb	-2.25332	0.0122045	-3.20879	3.03109e-05	-3.6899	1.04979e-05	-3.27602	1.87839e-07	-3.06458	1.52842e-06
1071	Ssa#XM_014128306.1	Arrestin domain containing 3b	0.538268	0.126483	0.397366	0.106991	0.840631	0.00434638	0.0326556	0.875662	0.127046	0.606886
1072	Ssa#XM_014128313.1	jeltraxin-like	0.915179	0.107753	1.31063	7.78356e-06	1.06322	0.00162185	0.484638	0.117908	0.256092	0.153252
1073	Ssa#XM_014128331.1	Cholesterol 25-hydroxylase-like protein	-0.895921	0.276517	-1.37429	0.000177666	-1.58057	0.000808916	-1.49917	0.000678842	-1.88814	0.000638286
1074	Ssa#XM_014128339.1	ran-binding protein 3-like	1.1555	0.010841	0.552924	0.175847	1.17585	0.00406344	0.639308	0.0812829	0.604986	0.174486
1075	Ssa#XM_014128343.1	Adenosine receptor A2a.2	-1.23034	0.0530696	-0.798451	0.204261	-1.11286	0.0770283	-1.49387	0.0355611	-0.639637	0.42627
1076	Ssa#XM_014128352.1	Small nuclear ribonucleoprotein Sm D3	-0.490247	0.162599	-0.669769	6.84139e-05	-1.18792	0.000290835	-0.694791	0.0023256	-0.599182	0.00230237
1077	Ssa#XM_014128385.1	ATPase inhibitor B, mitochondrial-like	-0.0294683	0.932588	-0.174474	0.579776	-0.0147704	0.968356	0.76902	0.0812964	1.01427	0.0321747
1078	Ssa#XM_014128399.1	Trafficking protein particle complex subunit 13	1.70898	0.0709133	2.03544	3.12027e-05	2.0082	0.000156835	1.49654	0.000737506	0.728124	0.022115
1079	Ssa#XM_014128415.1	Breakpoint cluster region	-0.649993	0.0276551	-1.25184	0.00146344	-1.46028	0.000721678	-1.72766	0.0103522	-1.17306	0.000345226
1080	Ssa#XM_014128422.1	Serine/threonine-protein kinase ULK1	0.519265	0.230181	0.657339	0.108002	0.822227	0.0458256	0.0579108	0.891786	-0.126328	0.788976
1081	Ssa#XM_014128514.1	Vitamin K-dependent gamma-carboxylase	-0.813887	0.00384743	-1.14249	0.000153363	-0.767357	0.00237641	-0.725416	0.0217252	-0.692709	0.0494943
1082	Ssa#XM_014128532.1	Serine/arginine-rich splicing factor 9	0.305049	0.384022	0.581973	0.0105111	0.549567	0.0277102	0.814488	0.00877342	1.05508	0.0018765
1083	Ssa#XM_014128548.1	solute carrier family 2, facilitated glucose transporter member 11-like	0.737211	0.0472107	0.919999	0.00860402	1.05039	0.013157	0.798902	0.0216168	0.622234	0.0414078
1084	Ssa#XM_014128552.1	Guanine nucleotide-binding protein G	-0.276502	0.448489	-1.01623	0.00320235	-1.1698	0.00196346	-1.45267	0.00295267	-1.61573	0.000896823
1085	Ssa#XM_014128578.1	Protein phosphatase 2, regulatory subunit B, alpha b	-0.945759	0.000448594	-0.234581	0.250313	-0.403287	0.0270081	-0.209972	0.305362	-0.252227	0.225557
1086	Ssa#XM_014128581.1	Dihydropyrimidinase-like 3	-0.486407	0.0373461	-0.763336	0.0018074	-0.621598	0.0180628	-1.13594	0.000982629	-0.73559	0.0134256
1087	Ssa#XM_014128598.1	Zinc finger protein 292a	-0.266901	0.569703	-0.760166	0.00149517	-0.873349	0.000955226	-1.0056	0.00144661	-1.01005	0.00164649
1088	Ssa#XM_014128619.1	Scinderin	-0.230659	0.495228	-1.02095	0.00172241	-0.723689	0.0143344	-1.11943	0.00956819	-0.895694	0.00976466
1089	Ssa#XM_014128632.1	General transcription factor 3C polypeptide 5	-1.19427	0.00177027	-0.609039	0.0489731	-0.677499	0.0173445	-0.358783	0.221943	-0.466008	0.219262
1090	Ssa#XM_014128668.1	histone-lysine N-methyltransferase Smyd1-like	0.569572	0.229937	-0.960392	0.00605559	-0.950639	0.0102601	-0.998485	0.0157806	-0.983247	0.0175615
1091	Ssa#XM_014128669.1	fatty acid binding protein	0.535589	0.345201	-1.73431	0.000468024	-1.36735	0.00754497	-0.673161	0.116653	-1.16672	0.0300289
1092	Ssa#XM_014128673.1	Endothelial differentiation-related factor 1	1.26026	0.148462	1.2622	0.0330803	1.63167	0.0198151	1.50031	0.0602721	0.884332	0.229314
1093	Ssa#XM_014128689.1	Protein C9orf69	0.488207	0.0578425	0.868964	3.11387e-05	0.617891	0.00038521	0.558216	0.00468693	0.357441	0.00465487
1094	Ssa#XM_014128695.1	G-protein signalling modulator 2	0.834449	0.00650282	0.743987	0.00596632	0.264184	0.276232	0.678163	0.0339704	0.466991	0.126165
1095	Ssa#XM_014128715.1	nuclear receptor coactivator 7-like	-0.271129	0.45947	-0.852306	0.000900641	-0.988377	0.00510891	-0.953877	0.00169735	-1.04733	0.00111274
1096	Ssa#XM_014128717.1	Regulator of G-protein signaling 3	0.311476	0.624366	1.04057	0.0814131	1.89671	0.00536588	1.41955	0.0162219	0.125681	0.793304
1097	Ssa#XM_014128741.1	Rab9 effector protein with kelch motifs	0.311122	0.386276	0.762359	0.0153402	0.965758	0.00917868	1.17182	0.00321576	0.895022	0.0156686
1098	Ssa#XM_014128749.1	V-abl Abelson murine leukemia viral oncogene homolog 2	-0.114721	0.640413	-0.528387	0.00929339	-0.701029	0.0181514	-0.743583	0.00861905	-0.821432	0.00458492
1099	Ssa#XM_014128751.1	RAB4B, member RAS oncogene family	1.03425	0.0948512	1.65564	0.000113134	1.45893	0.00101646	1.19311	0.00780315	1.27177	0.00546189
1100	Ssa#XM_014128789.1	zinc finger MYND domain-containing protein 19-like	-1.13784	0.000486861	-0.0677577	0.795679	-0.589405	0.00272496	0.0419403	0.862051	-0.718716	0.0153747
1101	Ssa#XM_014128823.1	G2/mitotic-specific cyclin-B1	-1.22326	9.2597e-06	-1.03894	0.000147058	0.064612	0.6387	-1.64689	0.0194738	-0.602856	0.0213183
1102	Ssa#XM_014128841.1	Succinyl-CoA:3-ketoacid coenzyme A transferase 1, mitochondrial	-0.21168	0.555782	1.08498	0.00326001	1.29415	0.00274141	0.811507	0.0622785	0.446421	0.273129
1103	Ssa#XM_014128855.1	dynein heavy chain-like	0.547073	0.167468	0.652252	0.0070337	1.01531	0.00103374	0.614562	0.0500733	0.317022	0.0947754
1104	Ssa#XM_014128880.1	erythropoietin-like	-0.439831	0.295038	2.03929	0.000385112	1.96659	0.000328011	2.05191	0.00278228	0.790585	0.295613
1105	Ssa#XM_014128896.1	Period circadian protein homolog 1; Period homolog 1	0.532814	0.139904	0.446791	0.110204	1.07061	0.00387881	0.617107	0.0370997	-0.385551	0.177998
1106	Ssa#XM_014128898.1	Vesicle-associated membrane protein 1	0.910728	0.141277	1.45359	0.00335023	1.73481	0.00151322	0.681441	0.0528918	0.371021	0.316139
1107	Ssa#XM_014128961.1	selenoprotein W, 1	0.863916	0.0546942	1.03673	0.00195266	0.847822	0.00340932	0.936754	0.00614114	0.289063	0.374777
1108	Ssa#XM_014128968.1	suppressor of tumorigenicity 14 protein-like	0.42956	0.127453	-0.35765	0.228061	-0.289564	0.27178	-1.12322	0.00639721	-0.907123	0.0249479
1109	Ssa#XM_014129002.1	extensin-1-like	-0.649827	0.166287	-0.857063	0.00348999	-0.715076	0.0193092	-0.895993	0.0150304	-1.05339	0.0100626
1110	Ssa#XM_014129005.1	Interleukin 13 receptor alpha-2	0.198875	0.5852	1.09183	0.000416262	1.38231	0.000269369	1.82409	0.0028008	0.798725	0.00977232
1111	Ssa#XM_014129023.1	platelet glycoprotein Ib alpha chain-like	-0.123125	0.782136	-0.999348	0.00125947	-0.855017	0.00399444	-0.653046	0.0366986	-1.10827	0.00195314
1112	Ssa#XM_014129034.1	Spectrin beta chain, non-erythrocytic 2	0.408296	0.0950445	0.914227	0.000414446	0.96988	0.000644629	0.443355	0.00665198	0.713639	0.00567258
1113	Ssa#XM_014129043.1	sodium/potassium/calcium exchanger 3-like	1.64503	0.0233124	1.66321	0.0105562	1.23664	0.0652161	1.7734	0.00635289	2.03168	0.00867685
1114	Ssa#XM_014129048.1	Selenoprotein N	-0.499032	0.139506	-0.90004	0.0148661	-1.19415	0.00236779	-1.00693	0.0108415	-0.484489	0.0898654
1115	Ssa#XM_014129074.1	solute carrier family 25, member 45	0.236631	0.350025	0.0984779	0.72418	0.837995	0.0116063	0.315072	0.275446	-0.018682	0.946823
1116	Ssa#XM_014129089.1	EH-domain containing 1a	-0.696871	0.0284259	-0.956069	0.00163636	-1.59504	0.000105953	-1.01071	0.00773223	-0.611648	0.0494336
1117	Ssa#XM_014129098.1	peroxiredoxin-5, mitochondrial-like	-0.753327	0.0718375	-0.735348	0.000810614	-0.661395	0.00123555	-1.19395	0.000136079	-0.57701	0.00806578
1118	Ssa#XM_014129114.1	Barrier-to-autointegration factor	-0.0928418	0.822195	0.548034	0.0059849	0.690256	0.00414685	1.11565	0.000991969	1.12856	0.000627277
1119	Ssa#XM_014129146.1	peptidyl-prolyl cis-trans isomerase FKBP2-like	-0.710755	0.0144285	-0.381753	0.0452049	-0.431977	0.113029	-1.16563	0.0236872	0.025834	0.911948
1120	Ssa#XM_014129152.1	4F2 cell-surface antigen heavy chain-like	-0.120241	0.815154	0.137197	0.781452	0.197257	0.689974	3.50751	0.000735277	3.074	0.000618442
1121	Ssa#XM_014129163.1	Ahsg protein - Ident 28	0.367889	0.409986	0.332316	0.339152	0.277181	0.39673	0.738319	0.134666	0.980133	0.044176
1122	Ssa#XM_014129164.1	Chromosome-associated kinesin KIF4A	-0.803206	0.00295771	-0.481196	0.0461814	-0.173377	0.643958	-0.559644	0.156403	0.118316	0.671524
1123	Ssa#XM_014129211.1	protein TSSC4-like	-0.136229	0.554492	-0.476001	0.00591839	-0.698309	1.99816e-05	-0.823116	0.000134549	-0.486057	0.00796102
1124	Ssa#XM_014129223.1	salivary glue protein Sgs-3-like	-0.836746	0.243017	-1.11764	0.000612792	-1.28967	0.00250458	-1.33746	0.0250561	-1.62063	5.58816e-05
1125	Ssa#XM_014129262.1	carbonyl reductase [NADPH] 1-like	-2.8352	0.00092053	-1.58866	0.0388776	-1.77427	0.0031859	-3.33311	0.000447685	-1.90933	0.0242191
1126	Ssa#XM_014129263.1	carbonyl reductase [NADPH] 1-like	-0.992137	0.0111274	-0.792772	0.0748423	-1.11669	0.0132147	-2.15442	0.000721056	-0.366287	0.330532
1127	Ssa#XM_014129286.1	NACHT, LRR and PYD domains-containing protein 1	0.431206	0.152771	0.538621	0.0157499	0.934397	0.000901112	0.717803	0.0177699	0.39101	0.102162
1128	Ssa#XM_014129304.1	Peroxiredoxin-4	-0.372104	0.146629	-0.801566	0.000481712	-0.52388	0.0219868	-0.949388	0.00149732	-0.682464	0.0249967
1129	Ssa#XM_014129305.1	diamine acetyltransferase 1-like	-0.395249	0.00406316	0.374732	0.243172	0.815189	0.0133971	0.214671	0.128335	0.290282	0.00836755
1130	Ssa#XM_014129311.1	ATPase, H+ transporting, lysosomal V1 subunit Aa	-0.405622	0.0177097	-0.641939	0.000250263	-0.811536	2.17057e-05	-0.900081	0.000867521	-0.63512	0.000622786
1131	Ssa#XM_014129342.1	probetacellulin-like	-1.32215	0.0315456	-1.26311	0.0152739	-2.56575	0.000399983	-1.94863	0.0126358	-1.38295	0.0378785
1132	Ssa#XM_014129346.1	WD repeat domain 55	-1.23348	0.0488964	0.138142	0.743818	-0.761789	0.0799604	0.78645	0.134275	0.594195	0.194788
1133	Ssa#XM_014129360.1	Kinesin-like protein KIF20A	-0.807662	0.0355378	-0.112638	0.654246	0.792011	0.0212683	-0.506792	0.279667	0.0987907	0.762392
1134	Ssa#XM_014129371.1	Bromodomain-containing protein 8	-0.875761	0.0199254	-1.10897	0.00143432	-1.06129	0.00451368	-1.09835	0.0113513	-1.0475	0.00838471
1135	Ssa#XM_014129387.1	carbonyl reductase [NADPH] 1-like (LOC106563564)	-1.08878	0.00999499	-0.734022	0.137848	-0.703698	0.0174681	-2.04214	0.000310624	-0.348523	0.421434
1136	Ssa#XM_014129398.1	Ferric-chelate reductase 1-like	-1.4091	0.0860718	-1.64779	0.0229089	-1.87685	0.0150735	-1.94167	0.0260412	-1.42958	0.0849291
1137	Ssa#XM_014129430.1	cytochrome c oxidase subunit 8B, mitochondrial-like	-0.562961	0.0270181	-0.355042	0.0285406	-0.816049	0.00930944	-0.79307	0.000649185	-0.636268	0.00225543
1138	Ssa#XM_014129454.1	High mobility group protein B3	-1.2097	0.000361603	-0.799445	0.00192696	-0.997765	0.0344013	-0.80447	0.0158806	-0.340773	0.283012
1139	Ssa#XM_014129455.1	protein CXorf40A-like	-0.781823	0.00421729	-0.699985	0.00223187	-0.966845	0.000369569	-0.152092	0.401308	-0.234511	0.224256
1140	Ssa#XM_014129475.1	Phosphatidylinositol binding clathrin assembly protein a	-0.717105	0.0128206	-0.314221	0.211785	-0.814059	0.00280799	-0.30417	0.216408	-0.288417	0.321709
1141	Ssa#XM_014129513.1	Bardet-Biedl syndrome 1	0.687368	0.0494287	0.980839	0.00185436	1.44006	0.000254551	0.321126	0.338957	0.0747062	0.785722
1142	Ssa#XM_014129528.1	liver-expressed antimicrobial peptide 2-like	-0.880722	0.084591	-1.00398	0.00451405	-1.43355	0.00100136	-0.668638	0.0654898	-0.48592	0.130877
1143	Ssa#XM_014129540.1	protein phosphatase 1 regulatory subunit 3B-like	0.310321	0.105652	-0.527708	0.0211493	-0.865722	0.000399835	-0.433973	0.0627289	-0.634007	0.014442
1144	Ssa#XM_014129545.1	N-deacetylase/N-sulfotransferase	0.0585026	0.730673	0.53343	0.0049875	0.830849	0.000571575	0.532472	0.0214043	0.519735	0.0197731
1145	Ssa#XM_014129561.1	steroid receptor RNA activator 1-like	-0.674018	0.00821018	-0.674627	0.00766758	-1.22488	0.00593296	-0.665226	0.0214368	-0.0913568	0.650064
1146	Ssa#XM_014129608.1	repetitive proline-rich cell wall protein 1-like	-0.753378	0.201172	-1.40639	9.60817e-06	-1.62211	0.000183479	-1.41737	0.000608114	-1.57416	0.000507774
1147	Ssa#XM_014129622.1	Bicaudal D-related protein 1 [BICD-related protein 1] - Ident 55	0.156536	0.362256	0.00322908	0.985176	0.346357	0.0442073	0.948332	0.00685063	0.645549	0.10258
1148	Ssa#XM_014129650.1	Nuclear speckle splicing regulatory protein 1	-0.474088	0.0545579	-0.771083	1.58405e-05	-0.820636	6.16095e-05	-0.800432	0.000751103	-0.776359	0.000222853
1149	Ssa#XM_014129658.1	zinc finger protein 665-like	0.646111	0.13412	0.987214	0.0201176	1.26863	0.0127624	0.93371	0.0638372	0.467206	0.288381
1150	Ssa#XM_014129709.1	Williams-Beuren syndrome chromosomal region 27 pro	-0.568258	0.33433	-1.29407	0.0126704	-0.975027	0.0827041	-1.47405	0.0200605	-0.965796	0.0977435
1151	Ssa#XM_014129727.1	Doublecortin-like kinase 1a	-0.0566465	0.890271	-0.765872	0.00410535	-0.866288	0.00421745	-0.818867	0.0120843	-0.891893	0.00830824
1152	Ssa#XM_014129766.1	Exosome complex component RRP43	-0.0961911	0.693604	-0.149672	0.571352	-0.30561	0.211105	0.31271	0.359306	0.834711	0.0168996
1153	Ssa#XM_014129792.1	Transient receptor potential cation channel, subfamily C, member 5b	0.904039	0.0355306	1.07735	0.0155761	1.21363	0.0422823	0.570636	0.151009	0.289602	0.371924
1154	Ssa#XM_014129808.1	Solute carrier family 46 member 3	0.52299	0.156614	0.23283	0.297925	0.541172	0.0847123	0.993011	0.026117	0.0632768	0.816499
1155	Ssa#XM_014129821.1	Nipped-b homolog b	-0.392808	0.233227	-0.731003	0.000509195	-0.642982	0.00146254	-0.621848	0.0060209	-1.01148	0.000196825
1156	Ssa#XM_014129826.1	CU059 protein	-0.15296	0.567158	-0.106753	0.182963	0.82424	0.00567613	-0.0794398	0.41938	0.140818	0.416605
1157	Ssa#XM_014129848.1	Exocyst complex component 6	1.32836	0.0227834	1.79007	8.15506e-05	1.93497	8.49418e-05	1.50315	0.000552575	0.978193	0.0155922
1158	Ssa#XM_014129907.1	Antimicrobial peptide NK-lysin-like	1.05252	0.00105835	0.804643	0.0104585	0.784425	0.00803275	0.119996	0.714815	0.168666	0.576597
1159	Ssa#XM_014129921.1	Serine/threonine-protein kinase Chk1	-1.04965	0.000450773	-0.76304	0.000854731	-1.46882	4.95016e-05	-0.895816	0.00124991	-0.282994	0.0774956
1160	Ssa#XM_014129924.1	fibrous sheath CABYR-binding protein-like	0.0263052	0.92005	0.0193675	0.938778	-0.234263	0.224218	0.284407	0.338612	2.14578	0.00158178
1161	Ssa#XM_014129941.1	ras-associating and dilute domain-containing protein-like	-0.715097	0.311926	-1.98393	7.01571e-05	-2.093	0.000991952	-1.80788	0.00299645	-2.44857	0.000505561
1162	Ssa#XM_014129945.1	Forkhead box K2	1.08623	0.0528992	1.43769	0.00110096	1.70498	0.000350332	1.13456	0.0118208	0.565061	0.114849
1163	Ssa#XM_014129953.1	Pseudogene with tubulin tyrosine ligase-like family member 6a TC1 transposase-like sequences	0.875452	0.00253726	0.724328	0.000611062	0.758435	0.00302088	0.312006	0.133694	0.489106	0.00349533
1164	Ssa#XM_014129973.1	zinc finger protein 664-like (LOC106596815)	0.848316	0.11104	1.26413	0.0036199	1.51449	0.00298361	1.52666	0.00677321	1.27293	0.013794
1165	Ssa#XM_014130021.1	Zinc finger C2H2	1.25408	0.0634365	1.67599	0.00274208	1.95951	0.00171921	1.24997	0.053484	1.23402	0.022286
1166	Ssa#XM_014130041.1	PiggyBac transposable element-derived protein 4	-0.23797	0.381978	0.608751	0.118127	0.323947	0.337968	1.08111	0.0163464	0.806685	0.0820454
1167	Ssa#XM_014130069.1	zinc finger protein 180-like	0.410645	0.0596252	0.701421	0.00236604	0.773803	0.00377197	0.98415	0.00209891	0.70182	0.0200854
1168	Ssa#XM_014130072.1	A-kinase anchor protein 8-like	1.37067	0.000386107	1.2766	9.71937e-06	0.775497	0.00543318	0.145999	0.612434	0.209089	0.42762
1169	Ssa#XM_014130090.1	Group 10 secretory phospholipase A2	1.12455	0.00490892	-0.960566	0.00191143	-1.77919	0.00112036	-1.87783	0.00187214	-2.09866	5.93723e-05
1170	Ssa#XM_014130098.1	ADP-ribosylation factor-binding protein GGA3-like	0.836069	0.0962433	1.26427	9.85598e-07	1.67145	1.19765e-06	1.31934	0.000281373	0.758239	0.000237205
1171	Ssa#XM_014130100.1	vascular cell adhesion protein 1-like	-0.495696	0.0942497	-1.03712	0.000679268	-1.18593	0.000301532	-0.879757	0.00568281	-0.543477	0.052988
1172	Ssa#XM_014130122.1	Poly	-0.0741136	0.840519	0.83377	0.00474211	1.23569	0.00106122	0.882799	0.0183898	0.80038	0.0153439
1173	Ssa#XM_014130160.1	multivesicular body subunit 12A-like	-0.116803	0.543001	0.818993	0.0043952	0.819198	0.00785	0.568893	0.0270294	0.45523	0.0602589
1174	Ssa#XM_014130167.1	perforin-1-like	0.561157	0.172776	-0.152478	0.681479	0.152084	0.679062	0.982874	0.0545474	2.06177	0.0157599
1175	Ssa#XM_014130171.1	WD repeat-containing protein 70	0.447039	0.240509	0.982175	0.00108871	0.850613	0.0049417	1.21368	0.00296452	1.05188	0.00789197
1176	Ssa#XM_014130176.1	Antimicrobial peptide NK-lysin-like	1.39042	0.00701391	1.42405	0.00260492	1.39664	0.00021901	0.296804	0.413201	1.0082	0.0339785
1177	Ssa#XM_014130189.1	fast skeletal myosin heavy chain	2.70835	0.0543752	1.673	0.00494811	1.25702	0.0472412	1.60458	0.018439	0.0480299	0.932876
1178	Ssa#XM_014130209.1	Tweety homolog 3b	-0.18701	0.624712	-0.632065	0.0706821	-0.0278576	0.941658	-0.429853	0.303738	-1.13992	0.0227684
1179	Ssa#XM_014130237.1	fast skeletal myosin heavy chain	2.86247	0.0648379	1.5445	0.0153836	1.19169	0.103208	1.28962	0.0864835	-0.0348198	0.959039
1180	Ssa#XM_014130240.1	Cysteine-rich PAK1 inhibitor	0.804439	0.142575	1.68793	4.57067e-05	1.86233	0.000222206	1.158	0.0173588	0.477119	0.12139
1181	Ssa#XM_014130245.1	zinc finger protein 239-like	1.01354	0.00285019	0.491153	0.0699159	0.675469	0.0201082	0.630154	0.0443989	0.608079	0.0966432
1182	Ssa#XM_014130259.1	fast skeletal myosin heavy chain	2.85197	0.0369583	1.74349	0.00114459	1.28453	0.0254351	1.64953	0.00643953	0.186594	0.692589
1183	Ssa#XM_014130270.1	NACHT, LRR and PYD domains-containing protein 6-like	0.393666	0.581559	-1.68737	0.00131385	-1.66385	0.00382009	-1.81936	0.00636561	-1.60936	0.0111498
1184	Ssa#XM_014130281.1	TP53-regulated inhibitor of apoptosis 1-B-like	-0.372204	0.141912	-0.0962796	0.583776	-0.432221	0.0532543	0.581941	0.0200713	0.807451	0.0243192
1185	Ssa#XM_014130310.1	Nuclear VCP-like	0.149986	0.730901	0.819078	0.00131289	0.950191	0.000692851	0.738718	0.0106537	0.722951	0.0226763
1186	Ssa#XM_014130323.1	Polycystin-1	1.15301	0.0671786	1.14166	0.00458411	1.28531	0.00863999	0.646178	0.015798	0.322438	0.145312
1187	Ssa#XM_014130328.1	Myosin, heavy chain b	2.77583	0.0535729	1.3265	0.0268958	0.925941	0.184214	1.24525	0.0794697	-0.308487	0.655771
1188	Ssa#XM_014130338.1	Tuberin	-0.787667	0.194644	-1.06899	0.00343416	-1.05251	0.0163747	-1.04689	0.0227569	-1.15628	0.0270107
1189	Ssa#XM_014130349.1	Exosome complex component CSL4	0.908367	0.0614287	1.42175	0.000138223	1.92898	0.000260101	1.97935	0.000311094	1.59349	0.000944348
1190	Ssa#XM_014130370.1	alpha-2-macroglobulin-like	0.291588	0.629494	0.489946	0.13201	0.778872	0.0283743	1.01812	0.0146014	1.20198	0.0187555
1191	Ssa#XM_014130378.1	Pyrroline-5-carboxylate reductase-like	-1.1325	0.00797714	-1.73901	0.000193383	-2.03122	0.000111684	-1.13273	0.030909	-0.381817	0.256062
1192	Ssa#XM_014130393.1	lysyl oxidase homolog 4-like (LOC106591784)	0.0611804	0.902688	-0.630238	0.0313468	-0.678319	0.0273624	-0.579153	0.127105	-0.864778	0.0274685
1193	Ssa#XM_014130434.1	HEPACAM family member 2	0.644218	0.208153	1.03114	0.000649873	0.608591	0.160116	0.269507	0.577218	-0.0285928	0.911939
1194	Ssa#XM_014130449.1	Sarcalumenin	0.16467	0.795606	-1.61839	0.00834618	-1.14402	0.0284848	-1.15952	0.0521145	-1.39415	0.0463654
1195	Ssa#XM_014130462.1	Integral membrane protein DGCR2/IDD	-1.15014	0.0810382	-2.10373	4.13972e-07	-2.20664	1.63384e-05	-2.12162	1.04497e-05	-2.21734	6.62929e-07
1196	Ssa#XM_014130465.1	3-mercaptopyruvate sulfurtransferase-like	-0.45618	0.262024	-1.6506	3.75771e-05	-2.85816	3.00633e-05	-3.09381	3.79668e-05	-2.3711	0.000152567
1197	Ssa#XM_014130481.1	zinc finger protein 850-like	0.303742	0.427106	0.558832	0.0218719	0.932491	0.00774758	1.31357	0.0019396	1.0084	0.00440958
1198	Ssa#XM_014130507.1	5-hydroxytryptamine receptor 3A-like	0.607991	0.0920919	1.19802	2.70586e-06	0.758602	0.00196937	0.644399	0.00764078	0.299279	0.0688845
1199	Ssa#XM_014130563.1	Glycerophosphodiester phosphodiesterase 1	-0.451934	0.0792117	-0.719215	0.0146946	-0.419468	0.0677095	-0.904665	0.00224336	-0.431688	0.0736939
1200	Ssa#XM_014130575.1	C3a anaphylatoxin chemotactic receptor-like	0.212251	0.706549	0.254079	0.322426	0.683538	0.00750976	2.4929	6.94914e-05	2.39103	3.17984e-05
1201	Ssa#XM_014130582.1	gamma-adducin-like	-0.145549	0.712732	-1.28151	7.19161e-05	-0.915223	0.00120543	-1.5548	0.000147954	-1.28175	0.000714269
1202	Ssa#XM_014130588.1	Adrenergic, alpha-2B-, receptor	0.346107	0.394821	0.338546	0.139177	0.278798	0.0707481	1.10437	0.0216033	0.302655	0.288649
1203	Ssa#XM_014130590.1	Programmed cell death 4a	1.24181	0.00880908	0.316535	0.261717	0.519718	0.0300616	-0.267816	0.432375	-0.240125	0.504141
1204	Ssa#XM_014130596.1	Dual specificity protein phosphatase 5	0.536429	0.0726244	0.954531	0.00550995	0.671682	0.0492431	0.341978	0.237662	0.338014	0.229461
1205	Ssa#XM_014130601.1	zinc finger protein 239-like (LOC106599965)	0.835219	0.0479796	1.14937	0.000135008	1.35984	0.000179653	1.36445	0.000623284	1.15449	0.0015078
1206	Ssa#XM_014130619.1	Low density lipoprotein receptor	-0.861696	0.0298883	-0.801487	0.0181953	-1.00365	0.011816	-1.04365	0.0202993	-0.885435	0.0337751
1207	Ssa#XM_014130626.1	Ring finger protein 185	0.202609	0.628522	-0.372822	0.419934	0.0514528	0.899134	0.981674	0.158722	2.1814	0.00506488
1208	Ssa#XM_014130646.1	DnaJ	-0.743806	0.0624599	0.449409	0.121135	0.74939	0.0286382	0.908457	0.0175022	0.486082	0.183452
1209	Ssa#XM_014130648.1	platelet-derived growth factor subunit A-like	1.16274	0.24289	1.96988	0.00108525	1.88216	0.00364565	1.6015	0.0260439	0.558388	0.247054
1210	Ssa#XM_014130654.1	Histone-lysine N-methyltransferase SETD1B	0.162223	0.507271	0.147509	0.375897	0.420556	0.071226	-0.351463	0.104246	-0.849287	0.00133629
1211	Ssa#XM_014130659.1	Nuclear factor, interleukin 3 regulated	0.463228	0.149121	0.262592	0.276726	0.699947	0.0201906	0.888936	0.00100073	-0.0191103	0.821821
1212	Ssa#XM_014130670.1	serine hydrolase-like protein	-0.903972	0.00208777	-0.538345	0.00193054	-0.553759	8.47444e-05	-0.651044	0.00039002	-0.151667	0.0577227
1213	Ssa#XM_014130673.1	activating transcription factor 7-interacting protein 1-like	0.343523	0.0721945	0.698376	0.00309765	0.800353	0.00181058	0.495715	0.0579505	0.122371	0.5452
1214	Ssa#XM_014130687.1	ras homolog family member F (in filopodia) (rhof), X1	0.844343	0.0182692	1.02815	0.00753052	1.53718	0.0001183	0.88405	0.00508233	0.743568	0.0497495
1215	Ssa#XM_014130698.1	ATPase ASNA1	-0.333585	0.221117	-0.682694	0.000493831	-0.819936	0.000392988	-0.597308	0.00859625	-0.120297	0.512444
1216	Ssa#XM_014130701.1	Golgi associated, gamma adaptin ear containing, ARF binding protein 1	-1.02542	0.134845	-1.73432	5.05503e-05	-1.76176	0.000189522	-1.78176	0.000988948	-2.0487	9.84559e-05
1217	Ssa#XM_014130705.1	Peroxiredoxin 2	-0.0920326	0.700144	0.520221	0.00850972	0.462071	0.00531697	0.514556	0.0105569	0.843175	0.00335135
1218	Ssa#XM_014130714.1	Glutaryl-CoA dehydrogenase, mitochondrial	-1.35309	0.026488	-0.350317	0.265999	-0.208674	0.542982	-0.663728	0.00620569	-0.516291	0.231369
1219	Ssa#XM_014130727.1	osteocalcin-like	-0.51279	0.379179	-1.62994	0.000516001	-1.51356	0.00220808	-1.46313	0.00615801	-1.58303	0.00539919
1220	Ssa#XM_014130732.1	ORAI calcium release-activated calcium modulator 1b	0.527694	0.0294021	0.319199	0.0836372	1.13584	5.59252e-05	0.780066	0.0137396	0.536909	0.0239419
1221	Ssa#XM_014130736.1	DNA polymerase lambda	-0.0138596	0.97433	0.950561	0.000252107	1.07677	0.00050728	0.78958	0.00935443	0.657097	0.0127326
1222	Ssa#XM_014130794.1	Protein RRP5 homolog	-0.187139	0.521994	0.468457	0.109732	0.433318	0.16881	1.13966	0.00204284	0.956652	0.000429612
1223	Ssa#XM_014130801.1	Gamma-aminobutyric acid	-0.229193	0.532034	-0.40025	0.0726004	-0.609468	0.0295456	-0.911753	0.0442527	-0.961026	0.00273337
1224	Ssa#XM_014130803.1	40S ribosomal protein SA	0.38942	0.463103	1.13246	0.0030182	1.40208	0.00182472	1.51685	0.00407217	1.34483	0.00523709
1225	Ssa#XM_014130887.1	Growth factor receptor-bound protein 2a	0.240591	0.367008	0.350846	0.121846	1.06698	0.000244418	0.36036	0.115659	0.0374325	0.880332
1226	Ssa#XM_014130924.1	Tetratricopeptide repeat protein 26	0.437645	0.156066	0.978188	0.0134169	1.46886	0.000480383	1.09453	0.00805617	0.891648	0.0200362
1227	Ssa#XM_014130965.1	Ras and Rab interactor 2	0.466231	0.0405666	-0.206325	0.193008	-0.342883	0.0651117	-0.847406	0.00332243	-0.693794	0.00576946
1228	Ssa#XM_014131057.1	Suppressor of cytokine-signaling 7	0.609533	0.109832	1.08054	7.77193e-07	0.820234	0.000602046	0.540305	0.0149362	0.327806	0.00564793
1229	Ssa#XM_014131158.1	serine/arginine-rich splicing factor 7	-0.285339	0.161884	-1.14155	1.53901e-06	-1.15055	0.0255926	-0.998795	0.000265706	-0.79041	0.00510028
1230	Ssa#XM_014131217.1	Oxysterol binding protein	-0.462225	0.206265	-0.943866	0.000385057	-0.961785	0.000193699	-1.64764	2.17574e-05	-1.11986	0.00026055
1231	Ssa#XM_014131243.1	Origin recognition complex subunit 3	-0.909057	0.0038098	-0.798868	0.000241205	-1.77224	6.56549e-07	-0.220241	0.334907	-0.0116185	0.935793
1232	Ssa#XM_014131245.1	Jagged 1b	0.674731	0.0018077	1.14606	0.000104726	1.45244	1.32e-05	1.1947	0.00927254	-0.140829	0.460991
1233	Ssa#XM_014131253.1	protein dpy-30 homolog	0.519031	0.43943	1.04502	0.00478226	1.24715	0.00214345	1.23577	0.0227846	1.43421	0.00254062
1234	Ssa#XM_014131273.1	ESF1 homolog	-1.1684	0.000401205	-0.190773	0.492421	-0.507098	0.0506387	0.223886	0.424455	-0.164411	0.48838
1235	Ssa#XM_014131294.1	Methionine adenosyltransferase II, alpha b	-0.939564	7.0551e-05	-0.0964774	0.669028	0.103524	0.586024	0.667939	0.0496453	0.0243061	0.934511
1236	Ssa#XM_014131312.1	SERTA domain-containing protein 2-like	0.911059	0.000798078	0.160226	0.479205	-0.116074	0.358717	-0.492534	0.00703365	-0.194787	0.254733
1237	Ssa#XM_014131317.1	Pellino homolog 2	-0.46902	0.478759	1.0235	0.000867613	0.884874	0.00299068	0.989339	0.00529507	0.823499	0.0207795
1238	Ssa#XM_014131322.1	Malate dehydrogenase 1Aa, NAD	-0.931469	0.041458	-0.935785	0.00129592	-0.915137	0.00424465	-1.4178	0.000734668	-1.03055	0.00389417
1239	Ssa#XM_014131346.1	Karyopherin alpha 2	-1.56699	8.96423e-05	-0.707679	0.00108774	-0.342751	0.045554	-0.773315	0.00621225	-0.835388	0.00144705
1240	Ssa#XM_014131347.1	V-akt murine thymoma viral oncogene homolog 2	0.322545	0.276489	0.884362	0.00356164	0.897997	0.00840065	0.494746	0.127143	0.438175	0.174657
1241	Ssa#XM_014131370.1	Synaptotagmin binding, cytoplasmic RNA interacting protein, like	-1.59559	0.0130162	-0.0551892	0.906275	-0.607812	0.214314	0.336791	0.54958	0.191969	0.728033
1242	Ssa#XM_014131372.1	beta-2-glycoprotein 1-like	-0.420518	0.133112	-0.806585	0.000126843	-0.850186	0.00078914	-0.665302	0.000219573	-0.705674	0.000432559
1243	Ssa#XM_014131420.1	Sodium-dependent phosphate transporter 1-B	-0.862853	0.0239113	-0.678251	0.121791	-0.779376	0.0396646	-1.10358	0.0690464	-0.818563	0.0535592
1244	Ssa#XM_014131453.1	Neuronal pentraxin 2b	-1.10111	1.01995e-06	-0.656884	0.00255134	-0.902878	3.11709e-05	-0.471103	0.0937442	-0.0512591	0.90048
1245	Ssa#XM_014131462.1	THO complex subunit 4-A-like	-0.806698	0.00254527	-0.771692	0.00101848	-1.00765	5.14737e-05	-0.688094	0.00680032	-0.435402	0.018278
1246	Ssa#XM_014131515.1	Keratin 14	0.959369	0.323339	-1.29053	0.00437728	-1.23368	0.00952661	-2.07946	0.00210009	-2.21328	0.000281186
1247	Ssa#XM_014131516.1	Keratin 14	0.791791	0.44488	-1.23528	0.014821	-1.35124	0.011678	-2.05414	0.00396896	-2.22972	0.000203358
1248	Ssa#XM_014131521.1	zinc finger protein OZF-like	0.684621	0.210665	0.967378	0.00116381	1.20303	0.000481432	1.1384	0.000745027	0.920045	0.0119405
1249	Ssa#XM_014131539.1	Gig2-1	0.299479	0.471623	0.399273	0.252899	0.665448	0.0973777	1.1362	0.022404	1.07036	0.0411943
1250	Ssa#XM_014131547.1	N-acetylmuramoyl-L-alanine amidase-like	0.725456	0.161874	1.2802	0.00386505	1.42255	0.00789439	1.70313	0.0113766	1.45323	0.0106484
1251	Ssa#XM_014131554.1	Spectrin beta chain, non-erythrocytic 2	0.00434864	0.988758	-0.408767	0.0777774	-0.57536	0.0295699	-1.03085	0.0044704	-1.02235	0.00509025
1252	Ssa#XM_014131560.1	Signal peptide peptidase-like 3	-0.384171	0.138387	-0.886475	0.00278257	-0.987935	0.0103807	-0.812803	0.0343653	-0.886215	0.00785697
1253	Ssa#XM_014131563.1	Calpain, small subunit 1 b	-1.06906	0.0174314	-0.526172	0.0946564	-0.473145	0.180198	-0.641661	0.0374261	0.0305743	0.907051
1254	Ssa#XM_014131569.1	Transmembrane protein 63B	0.301447	0.383421	0.942339	0.00177399	0.681012	0.00675052	0.858875	0.00435671	0.580815	0.0203465
1255	Ssa#XM_014131599.1	Dynein, light chain, roadblock-type 1	-0.855693	0.0117903	-1.3103	0.00031663	-1.10183	0.00314675	-0.965451	0.0180972	-0.618282	0.0407762
1256	Ssa#XM_014131608.1	RNA-binding protein 12-like	0.0665798	0.770637	0.513959	0.0141619	0.588499	0.0114546	0.955358	0.00970076	0.705863	0.0082546
1257	Ssa#XM_014131670.1	MTSS1-like protein	1.05319	0.0323067	1.35052	0.00433199	1.17444	0.0169443	0.867026	0.0994556	0.930023	0.0641982
1258	Ssa#XM_014131677.1	Matrilin-4	1.16888	0.123696	2.27944	6.98368e-06	2.07102	0.000664076	1.59068	0.0175187	0.971147	0.0138459
1259	Ssa#XM_014131691.1	prostate transmembrane protein, androgen induced 1	0.647762	0.069742	0.942584	0.0139961	0.664175	0.0187103	0.510628	0.0905648	1.04399	0.00227503
1260	Ssa#XM_014131709.1	Cyp24a1l 1_25-dihydroxyvitamin D(3) 24-hydroxylase	0.849519	0.276522	0.130542	0.857423	1.92802	0.00179367	1.08401	0.0710831	0.466181	0.446998
1261	Ssa#XM_014131739.1	Calpastatin	0.384287	0.173146	0.603999	0.104729	1.08315	0.000731924	0.784664	0.00774431	0.632936	0.0238544
1262	Ssa#XM_014131850.1	Cryptochrome 1b	0.797321	0.061541	1.22451	0.000441547	1.96173	5.6531e-05	1.64072	0.000438931	-0.0412913	0.859485
1263	Ssa#XM_014131864.1	Differentially expressed in FDCP 6a homolog	0.691274	0.125556	0.959516	0.00844288	1.52094	0.000158201	0.764571	0.0689359	0.00980725	0.967847
1264	Ssa#XM_014131878.1	G0/G1 switch protein 2	0.00027236	0.999693	-0.412336	0.594493	-3.10766	0.00206896	-1.32152	0.15538	0.499963	0.578386
1265	Ssa#XM_014131895.1	F-box only protein 42	0.519293	0.194391	1.31258	0.00101368	1.34267	0.000627768	0.694772	0.0506447	0.0437647	0.863773
1266	Ssa#XM_014131916.1	Mitochondrial carnitine/acylcarnitine carrier protein	0.118172	0.656159	0.650738	0.0136962	0.817974	0.0118433	0.52961	0.124184	0.318774	0.272405
1267	Ssa#XM_014131918.1	NCK-interacting protein with SH3 domain	0.0327628	0.890313	-0.0297396	0.816531	-0.0767926	0.53235	-0.884412	0.000144084	-0.740695	0.0027311
1268	Ssa#XM_014131925.1	cytokine-inducible SH2-containing protein-like	-0.0650068	0.845246	0.853428	0.00615656	0.984113	0.00061392	1.08775	0.00239579	0.629565	0.0689382
1269	Ssa#XM_014131973.1	Inter-alpha (Globulin) inhibitor H3 - Ident 56	-0.139945	0.542489	-0.703376	0.00065728	-1.09165	0.0192506	-0.763068	0.0156053	-0.549479	0.0221044
1270	Ssa#XM_014132025.1	Retinol dehydrogenase 12_ like - Ident 44	-0.0870472	0.820622	1.16157	0.000423739	1.05482	0.0017721	1.21306	0.00213904	0.928115	0.00577066
1271	Ssa#XM_014132034.1	Cell division cycle 34 homolog	0.336451	0.211159	0.526608	0.0141455	0.452323	0.0283769	0.925545	0.00311253	0.738932	0.00431384
1272	Ssa#XM_014132043.1	glutaredoxin-1-like	0.320683	0.183983	0.7976	0.00478003	0.93822	0.00178781	0.301346	0.265884	0.0947942	0.776055
1273	Ssa#XM_014132057.1	WD repeat-containing protein 1	-0.721566	0.00383999	-0.576622	0.000298065	-0.796207	0.000196407	-1.18794	1.81478e-05	-0.700692	0.00272758
1274	Ssa#XM_014132060.1	Cell growth-regulating nucleolar protein	-1.14014	0.0102517	-1.25718	0.000685435	-1.36483	0.000252823	-0.802337	0.0509734	-0.447538	0.119133
1275	Ssa#XM_014132076.1	Plexin A3	0.500443	0.214745	1.18702	0.0087053	1.51438	0.000698209	0.374178	0.273909	-0.0502035	0.877991
1276	Ssa#XM_014132132.1	Thioredoxin reductase 3	-1.34917	0.0824464	-0.944639	0.0226278	-1.28072	0.00620443	-1.02159	0.0434053	-0.500061	0.26133
1277	Ssa#XM_014132180.1	Serinc1 protein	0.60618	0.291454	1.30534	0.000238233	1.22507	0.00505087	0.602672	0.11715	0.484013	0.134954
1278	Ssa#XM_014132183.1	P2Y purinoceptor 1-like	0.319433	0.222713	0.54343	0.0427848	1.0237	0.0218244	1.46013	0.000167511	1.99837	1.85462e-05
1279	Ssa#XM_014132219.1	WW domain containing E3 ubiquitin protein ligase 2	0.732431	0.105622	1.45623	0.000282512	1.47075	0.000577535	0.861934	0.0235449	0.471119	0.18567
1280	Ssa#XM_014132238.1	Ubiquitin-conjugating enzyme E2 C	-0.940829	0.00589251	-0.612456	0.025143	0.374354	0.172426	-1.20904	0.0664962	-0.527354	0.114034
1281	Ssa#XM_014132243.1	Voltage-dependent calcium channel subunit alpha-2/	0.678176	0.0741625	0.913373	0.0116986	1.13009	0.0215544	0.543459	0.151662	0.536032	0.174746
1282	Ssa#XM_014132248.1	lysophosphatidic acid receptor 6-like	-0.0829285	0.779696	0.154535	0.593931	0.164349	0.64229	0.760176	0.0531129	0.99233	0.013425
1283	Ssa#XM_014132319.1	Novel protein with type I phosphodiesterase/nucleotide pyrophosphatase domain - Ident 34	0.371357	0.571878	0.944254	0.0194097	0.757502	0.139774	-0.172748	0.712535	0.43197	0.286616
1284	Ssa#XM_014132332.1	Double-stranded RNA-binding protein Staufen homolog 1	-0.348387	0.22611	-0.839768	2.4021e-05	-1.1081	0.00321299	-0.917998	0.000245103	-1.03687	1.34922e-05
1285	Ssa#XM_014132335.1	prostacyclin synthase-like	-0.53771	0.11327	-0.596928	0.056389	-0.90326	0.00883045	-1.03107	0.0079851	-0.664048	0.0493111
1286	Ssa#XM_014132343.1	CASP8 and FADD-like apoptosis regulator CASP8 and FADD-like apoptosis regulator	0.377785	0.353729	1.45768	0.00028074	1.44619	0.00168776	1.01996	0.0142723	1.01406	0.0150122
1287	Ssa#XM_014132350.1	Protransforming growth factor alpha	1.23196	0.158128	1.28189	0.0128055	1.1844	0.0559148	1.14252	0.0278874	0.975637	0.0538115
1288	Ssa#XM_014132411.1	Citron Rho-interacting kinase	-0.925156	0.0182822	-1.0058	0.00323114	-0.334276	0.353036	-1.10562	0.0446574	-0.601835	0.128528
1289	Ssa#XM_014132434.1	phospholipase DDHD2-like	-0.00771574	0.965127	0.282288	0.191967	0.296231	0.121594	1.01435	0.0143299	1.12469	0.000907054
1290	Ssa#XM_014132436.1	D-aspartate oxidase	1.34471	0.0293952	1.88195	6.49823e-06	1.47772	0.000706416	1.48801	0.00205343	0.924772	0.0315318
1291	Ssa#XM_014132445.1	Musashi homolog 1	-0.377821	0.10986	-0.643126	0.0109212	-0.81907	1.81634e-05	-0.513236	0.00509827	-0.188814	0.183807
1292	Ssa#XM_014132491.1	Protein SYS1 homolog	1.01127	0.115475	1.84556	0.000579337	1.53949	0.00571068	1.37233	0.00523723	1.05068	0.0223691
1293	Ssa#XM_014132537.1	NADH-cytochrome b5 reductase 3-like	-0.449774	0.128512	-0.198912	0.307034	-0.216365	0.342612	-0.854132	0.0135103	-0.547359	0.044477
1294	Ssa#XM_014132538.1	guanine nucleotide exchange factor MSS4-like	-0.0825233	0.68135	0.543125	0.0250745	0.372392	0.0608196	0.871357	0.00166122	0.654605	0.0104568
1295	Ssa#XM_014132555.1	CTD small phosphatase 2	0.390746	0.0908672	0.845768	0.000224626	1.01457	0.00025096	1.03343	0.000543552	0.82185	0.00320336
1296	Ssa#XM_014132560.1	Scinderin	-0.536931	0.131677	-1.02502	0.00603664	-1.38407	0.00600245	-1.96567	0.000898135	-1.86254	0.000976355
1297	Ssa#XM_014132569.1	Leucine-rich repeat flightless-interacting protein	0.809677	0.0405529	0.879956	0.00144851	1.16953	0.00182451	0.749411	0.0266333	0.303692	0.305807
1298	Ssa#XM_014132573.1	SAP domain-containing ribonucleoprotein-like	0.635382	0.0588347	0.511323	0.0944986	0.66723	0.0470239	1.32082	0.00399601	0.956718	0.0276765
1299	Ssa#XM_014132580.1	Tubulin, alpha 1a	0.384532	0.474327	0.511865	0.27278	0.445665	0.354487	0.893744	0.192274	1.43432	0.0205846
1300	Ssa#XM_014132582.1	Protein timeless homolog	-0.691341	0.00990355	-0.624824	0.00236283	-1.00053	0.00136472	-0.452349	0.0811642	-0.261694	0.217035
1301	Ssa#XM_014132587.1	matrix metalloproteinase-19-like	0.405448	0.23164	0.0936629	0.712242	-0.179194	0.570988	0.400432	0.266205	1.22357	0.00634318
1302	Ssa#XM_014132683.1	Neverland	0.418114	0.424172	0.816078	0.0174724	0.821611	0.0330483	1.38108	0.00371045	1.97689	0.000878472
1303	Ssa#XM_014132704.1	Glutamate receptor, metabotropic 3	0.583588	0.0667667	0.852975	3.52021e-06	1.08595	0.0906686	0.310599	0.0939493	0.203039	0.0454301
1304	Ssa#XM_014132720.1	ring finger protein 223	-0.354204	0.423765	-0.627048	0.00696599	-0.793763	0.00307429	-0.6285	0.0193751	-0.893793	0.00244037
1305	Ssa#XM_014132749.1	elongation factor Ts, mitochondrial	-1.40594	0.000958618	-0.728837	0.00243923	-0.675146	0.00672982	-0.379462	0.132562	-0.488475	0.0860139
1306	Ssa#XM_014132750.1	Neurogenic differentiation factor	-1.26317	0.16178	-2.3212	3.40273e-07	-2.524	1.32701e-06	-2.44682	2.16424e-06	-2.52059	2.76075e-06
1307	Ssa#XM_014132778.1	Peptidyl-prolyl cis-trans isomerase	-0.291443	0.573661	-0.915234	0.0510627	-0.958732	0.0834229	-1.54008	0.034942	0.00788997	0.988736
1308	Ssa#XM_014132812.1	histone H1x	1.31585	0.00167595	0.567428	0.165031	1.45018	0.00222751	0.108427	0.801217	-0.319909	0.444706
1309	Ssa#XM_014132814.1	6-phosphofructo-2-kinase/fructose-2,6-bisphosphatase 4-like	0.0746816	0.867238	1.72056	0.00961745	2.53056	0.00128897	2.38119	9.92482e-05	0.56736	0.202775
1310	Ssa#XM_014132826.1	Inositol hexaphosphate kinase 2	0.666667	0.0624136	1.18721	0.000594971	1.41824	0.000782466	1.45504	0.00170534	-0.129014	0.709055
1311	Ssa#XM_014132838.1	RNA-binding protein 5	0.699968	0.0376479	1.19116	9.99832e-05	1.18658	0.00140725	0.453595	0.120412	0.134529	0.500872
1312	Ssa#XM_014132846.1	Fancd2 protein	-1.01463	0.00346594	-0.162411	0.345141	-0.206455	0.411014	0.105973	0.558022	0.00564152	0.976113
1313	Ssa#XM_014132849.1	Testis-expressed sequence 264 protein	0.145	0.628272	-0.0569541	0.786334	-0.0507396	0.829049	1.12194	0.00999728	1.26433	0.00409445
1314	Ssa#XM_014132880.1	Activating transcription factor 7a	0.0644917	0.907436	-0.732068	0.121114	-1.29264	0.0365159	-0.390125	0.448521	0.544901	0.324876
1315	Ssa#XM_014132910.1	ankyrin repeat domain-containing protein 33B-like	-0.78131	0.174677	-1.96396	1.30166e-05	-1.96823	0.000489263	-1.98282	1.44265e-05	-1.87031	0.000365995
1316	Ssa#XM_014132912.1	probable G-protein coupled receptor	1.41915	0.0718501	3.59238	1.72891e-06	4.23328	1.9822e-06	3.91197	8.88605e-05	3.27308	0.000120898
1317	Ssa#XM_014132914.1	Prefoldin subunit 5	-0.0551237	0.91293	0.822339	0.00692874	0.317827	0.243757	0.834897	0.0236317	1.15002	0.0060334
1318	Ssa#XM_014132926.1	Cell division cycle 42, like	-1.00242	0.000599716	-0.334238	0.0751515	-0.694008	0.00318753	-1.03556	0.000687659	-0.850154	0.00237544
1319	Ssa#XM_014132940.1	Major facilitator superfamily domain-containing protein 4-B	0.156861	0.763965	0.240058	0.542395	0.0132258	0.973355	0.373095	0.549677	0.893937	0.0173234
1320	Ssa#XM_014132970.1	mitochondrial ribosomal protein L20	-0.711922	0.00273362	-0.212178	0.308047	-1.0573	0.00476769	-0.00189465	0.993017	0.242787	0.260021
1321	Ssa#XM_014132974.1	Cyclin-L1	0.184689	0.143992	0.499397	0.00269076	0.912685	0.00017199	0.487889	0.00798156	0.263737	0.0805985
1322	Ssa#XM_014132998.1	E3 ubiquitin-protein ligase rnf146; AltName: Full=RING finger protein 146	0.317709	0.200967	0.563139	0.0213188	0.330857	0.143953	0.762183	0.00951182	0.955899	0.00150469
1323	Ssa#XM_014133039.1	Interferon regulatory factor 6	0.458805	0.121551	0.984009	1.21426e-05	1.22926	5.76844e-06	0.776973	0.00186608	0.658096	0.00103168
1324	Ssa#XM_014133043.1	Separin	-0.353142	0.451464	0.609912	0.132302	1.16849	0.0307015	0.35729	0.493742	0.894542	0.0794521
1325	Ssa#XM_014133068.1	Forkhead box protein P4	-0.310327	0.117406	-1.03485	5.41822e-05	-1.01839	0.000119395	-1.04942	0.00110875	-1.00796	0.00105587
1326	Ssa#XM_014133132.1	nucleoside diphosphate kinase B-like	0.862569	0.0370955	0.521781	0.104433	0.62638	0.147676	0.739123	0.113065	1.03174	0.0321161
1327	Ssa#XM_014133136.1	Dolichyl-diphosphooligosaccharide--protein glycosyltransferase subunit 2	-0.380846	0.13654	-0.863982	0.0167468	-0.820592	0.0628008	-0.844501	0.0136568	-0.660499	0.122602
1328	Ssa#XM_014133283.1	zinc fingers and homeoboxes protein 3-like	0.107045	0.725962	1.08466	0.000999568	0.923191	0.00958289	1.07883	0.00491641	1.12414	0.00385037
1329	Ssa#XM_014133296.1	NDRG family member 3, isoform CRA_c; Protein NDRG3	-0.537721	0.000648024	-0.715148	0.000243909	-0.700093	0.000229193	-0.90631	0.000422105	-0.69354	0.00163101
1330	Ssa#XM_014133299.1	PHD finger protein 20	-0.887144	0.0231384	-0.496187	0.0503893	-0.869407	0.000639738	-0.642062	0.0201509	-1.14036	0.000245378
1331	Ssa#XM_014133340.1	opioid growth factor receptor-like	0.336705	0.168896	0.530033	0.0471185	0.993584	0.00679454	0.991874	0.0236383	1.15047	0.0386505
1332	Ssa#XM_014133364.1	Mitochondrial intermembrane space import and assembly protein 40	-1.28023	0.0095353	-0.256683	0.383764	-0.751482	0.00593288	0.1665	0.527222	0.551151	0.0947419
1333	Ssa#XM_014133374.1	MAP kinase-activated protein kinase 3-like	0.158916	0.764655	0.554192	0.149394	0.701405	0.0828164	2.77836	0.00440177	3.02791	0.000200551
1334	Ssa#XM_014133381.1	ras-related protein Rab-7a	0.510302	0.102985	0.650638	0.0126754	0.714094	0.0113508	0.685291	0.0237195	0.968982	0.00597504
1335	Ssa#XM_014133383.1	Dolichyl-diphosphooligosaccharide--protein glycosyltransferase subunit 1	-0.502279	0.136464	-0.531106	0.0544208	-0.899221	0.02598	-1.06529	0.0140471	-0.364617	0.250913
1336	Ssa#XM_014133388.1	Inter-alpha-trypsin inhibitor heavy chain H1	-0.668034	0.00795436	-1.01813	0.00168865	-1.09839	0.0012773	-0.80922	0.015654	-0.731015	0.00435348
1337	Ssa#XM_014133433.1	solute carrier family 2, facilitated glucose transporter member 9-like	-0.943514	0.11472	-0.440192	0.355755	-0.804482	0.0740477	-2.05715	0.0025046	-0.0066427	0.988999
1338	Ssa#XM_014133436.1	Synaptophysin b	-0.138683	0.174665	0.604239	0.000784818	1.23833	2.37323e-05	0.601896	0.000911218	0.353125	0.0419282
1339	Ssa#XM_014133437.1	calcium-dependent secretion activator 1	-0.169136	0.656381	-0.874872	0.000137617	-0.82843	3.62681e-05	-0.859052	0.00017875	-0.87835	0.00017113
1340	Ssa#XM_014133451.1	Protein tyrosine phosphatase, receptor type, g a	1.22438	0.00635554	0.241397	0.411638	0.370462	0.271633	0.270804	0.434267	-0.0809636	0.824867
1341	Ssa#XM_014133457.1	C-C motif chemokine 19 precursor-1	-0.0845579	0.912004	0.742825	0.291466	0.028547	0.965884	1.87438	0.0551564	2.26446	0.0365124
1342	Ssa#XM_014133465.1	guanine nucleotide-binding protein-like 3	-0.257404	0.748734	1.05493	0.0397186	0.805248	0.158528	1.40042	0.0287443	1.12752	0.0584563
1343	Ssa#XM_014133473.1	T-complex protein 11-like protein 2	-0.940018	0.000656339	-1.6507	2.35267e-05	-1.25676	4.89965e-05	-1.87563	3.4391e-05	-1.84309	7.02206e-06
1344	Ssa#XM_014133516.1	vomeronasal type-1 receptor 4-like	1.20358	0.323148	1.78455	0.0192457	1.4376	0.11648	0.364365	0.693951	-0.353516	0.663257
1345	Ssa#XM_014133517.1	homeodomain transcription factor 1	0.379379	0.428456	0.556439	0.0594934	0.815983	0.0195821	0.410562	0.248359	0.480694	0.160706
1346	Ssa#XM_014133525.1	Eukaryotic translation initiation factor 4 gamma 3	-0.918088	0.000502235	-0.425423	0.00217123	-0.529482	0.000971227	-0.467931	0.0122345	-0.703384	0.000649567
1347	Ssa#XM_014133543.1	Endothelin-converting enzyme 1	0.246385	0.609852	-0.0821263	0.819974	0.169851	0.647242	-0.53422	0.220646	-1.15248	0.0206599
1348	Ssa#XM_014133556.1	ephrin type-B receptor 2	0.111393	0.442956	0.425464	0.00302773	0.602037	0.000439962	0.941	9.50886e-05	0.420596	0.00696261
1349	Ssa#XM_014133567.1	Rho guanine nucleotide exchange factor 10-like pro	-0.945779	0.0337596	-1.3074	0.000550527	-1.70646	3.08832e-05	-1.69813	0.000230581	-0.993418	0.0396199
1350	Ssa#XM_014133595.1	Delta-1-pyrroline-5-carboxylate dehydrogenase, mitochondrial	-1.03383	0.00952225	-0.821338	0.00313573	-0.911154	0.00062822	-0.781916	0.0161321	-0.663696	0.0622875
1351	Ssa#XM_014133598.1	MRNA turnover protein 4 homolog	-0.198828	0.701283	0.773784	0.0878803	0.404835	0.394493	1.74926	0.00845838	1.81262	0.00465036
1352	Ssa#XM_014133614.1	angiopoietin-related protein 7-like (LOC106608036)	0.0385618	0.888263	0.626231	0.000860927	0.565699	0.00250164	0.951179	0.000562747	0.99963	0.000271325
1353	Ssa#XM_014133615.1	serine-rich adhesin for platelets-like	-0.0466134	0.792825	-1.69672	9.07543e-07	-1.69659	1.66556e-06	-2.46075	0.00122903	-1.23382	9.96101e-05
1354	Ssa#XM_014133616.1	ERBB receptor feedback inhibitor 1	0.519206	0.310701	0.364378	0.348401	1.42979	0.00418154	1.25541	0.00147674	0.234265	0.430694
1355	Ssa#XM_014133623.1	cell death activator CIDE-3-like	0.134918	0.659484	0.482365	0.0203971	0.330016	0.0742586	1.4088	0.0401803	0.794244	0.0547664
1356	Ssa#XM_014133692.1	Vacuolar fusion protein MON1 homolog B	1.16051	0.0328713	1.12408	0.00613789	1.50185	0.000494023	1.06765	0.0149564	1.0399	0.0371704
1357	Ssa#XM_014133702.1	T-cell leukemia translocation-altered gene protein homolog	0.825079	0.00940028	0.29394	0.236433	0.699793	0.0172742	0.697594	0.0487163	0.256843	0.379756
1358	Ssa#XM_014133705.1	cytokine-inducible SH2-containing protein-like	1.14583	0.0664242	2.40446	1.35313e-05	3.18276	2.51128e-05	2.90448	7.84865e-06	2.81092	5.03477e-05
1359	Ssa#XM_014133735.1	tumor necrosis factor receptor superfamily member 10C-like	0.8753	0.0929035	1.37535	3.22201e-05	1.26178	0.00132047	0.934742	0.0195866	0.893442	0.0023473
1360	Ssa#XM_014133743.1	GDH/6PGL endoplasmic bifunctional protein	0.328066	0.283785	0.419028	0.0588651	0.724856	0.0161832	0.505134	0.0514884	0.834793	0.0107202
1361	Ssa#XM_014133762.1	rho guanine nucleotide exchange factor 19-like	0.391981	0.15365	0.378325	0.0175665	0.363436	0.0967363	0.612007	0.179747	1.05024	0.0298023
1362	Ssa#XM_014133846.1	CD9 antigen	-1.27998	0.225184	-2.815	3.3564e-05	-3.3226	1.894e-05	-2.72001	0.000932833	-2.22429	0.0147374
1363	Ssa#XM_014133850.1	Monocarboxylate transporter 1	0.346062	0.127775	0.126391	0.564526	-0.11257	0.662504	-0.881176	0.0277589	-0.894039	0.0102117
1364	Ssa#XM_014133868.1	RNA-binding protein 5	0.636929	0.155039	0.947988	0.00394253	0.992915	0.0140025	0.399064	0.295634	0.405189	0.227443
1365	Ssa#XM_014133882.1	Guanine nucleotide binding protein	0.0863076	0.814748	1.77753	7.24753e-06	3.04387	3.23525e-08	2.13503	0.00049298	0.974005	0.000444478
1366	Ssa#XM_014133909.1	Bcl-2-related ovarian killer protein homolog A	0.693226	0.372492	0.864414	0.224249	1.62591	0.0096621	1.0592	0.11033	1.14984	0.0721706
1367	Ssa#XM_014133910.1	Adenosine receptor A1	0.862631	0.0471096	0.823989	0.000616034	0.512031	0.0361598	0.246925	0.240026	0.328318	0.148622
1368	Ssa#XM_014133932.1	major histocompatibility complex class I-related gene protein-like	0.199202	0.558913	-1.01695	0.00488469	-1.52451	0.000582494	-0.889861	0.0404959	0.102385	0.791358
1369	Ssa#XM_014133942.1	40S ribosomal protein S23	0.411727	0.139598	0.63787	0.016831	0.807038	0.00637584	0.873458	0.0105483	0.86842	0.00894459
1370	Ssa#XM_014133963.1	Copine V	-0.134866	0.717409	-0.744408	0.00217878	-0.88176	0.00156589	-0.877518	0.00516636	-0.814968	0.00751235
1371	Ssa#XM_014133973.1	Serine hydroxymethyltransferase 1	0.7239	0.297344	1.01414	0.00595274	0.890479	0.0289	1.22288	0.018549	0.980342	0.0748016
1372	Ssa#XM_014133976.1	cytochrome c oxidase subunit NDUFA4-like	-0.545298	0.356252	-0.63266	0.051046	-0.983921	0.0119174	-0.961355	0.0582508	-1.32441	0.00296794
1373	Ssa#XM_014133978.1	inhibin beta B chain-like	0.452397	0.529196	-0.348012	0.43031	-1.65837	0.00686077	-1.01039	0.129281	-0.648597	0.233514
1374	Ssa#XM_014133986.1	zinc finger protein 436-like	0.230823	0.567837	0.272794	0.29057	0.88636	0.0168015	1.36805	0.00155979	1.80289	0.000209223
1375	Ssa#XM_014133990.1	zinc finger protein 2 homolog	0.263528	0.578689	0.649689	0.102998	0.97853	0.0368432	1.42906	0.0217956	1.20454	0.027536
1376	Ssa#XM_014133999.1	Sterol O-acyltransferase 2	0.800343	0.0326771	0.330149	0.0393913	0.836168	0.00127889	0.572326	0.161335	0.587579	0.00536144
1377	Ssa#XM_014134004.1	Methionine--tRNA ligase, cytoplasmic;	-0.371267	0.260958	-0.458342	0.18767	-0.804808	0.0275141	0.597848	0.236215	0.809864	0.0446225
1378	Ssa#XM_014134027.1	Nck-associated protein 1	0.792429	0.0215675	0.869548	0.00243719	0.805313	0.0462384	0.184645	0.607322	0.185955	0.471856
1379	Ssa#XM_014134040.1	proline rich 13	-0.223208	0.303021	-0.933516	0.000533137	-0.983232	0.00036274	-0.889654	0.00435181	-0.564666	0.0222777
1380	Ssa#XM_014134056.1	sodium- and chloride-dependent taurine transporter-like	0.083018	0.624199	2.4669	1.97719e-07	2.811	7.15923e-08	2.51561	1.34917e-05	2.00583	3.77082e-06
1381	Ssa#XM_014134057.1	gamma-glutamyl hydrolase-like	0.13265	0.58882	0.384746	0.00571682	0.995571	0.000889457	0.816476	0.00263934	0.498818	0.0345954
1382	Ssa#XM_014134073.1	protein SSUH2 homolog	0.249969	0.346893	0.268576	0.152337	0.844527	0.00279866	1.17947	0.00266304	0.851341	0.00315389
1383	Ssa#XM_014134074.1	protein SSUH2 homolog	0.29623	0.442313	0.40248	0.120707	0.978736	0.00503383	1.08972	0.0184272	0.743156	0.0361202
1384	Ssa#XM_014134078.1	Ras protein-specific guanine nucleotide-releasing factor 2b	-0.22595	0.638755	-0.839371	0.00300304	-0.80322	0.00429768	-0.807359	0.0136036	-0.562844	0.121739
1385	Ssa#XM_014134085.1	Mesencephalic astrocyte-derived neurotrophic factor	-1.04907	0.00828305	-1.47528	0.00261756	-1.66736	0.000400133	-1.48872	0.00173326	-0.783935	0.0791403
1386	Ssa#XM_014134086.1	Dedicator of cytokinesis 4b	-0.380975	0.55832	-0.489093	0.112208	-0.906108	0.049245	-0.876889	0.106879	-1.07395	0.0209168
1387	Ssa#XM_014134146.1	Pyruvate dehydrogenase E1 component subunit beta, mitochondrial	0.0243038	0.962444	0.393027	0.268054	0.57271	0.156692	1.05521	0.030902	0.681997	0.119933
1388	Ssa#XM_014134147.1	Small nuclear ribonucleoprotein Sm D3	-0.311865	0.37623	0.0600816	0.822465	-0.339901	0.236245	0.664135	0.0497104	1.00745	0.00694251
1389	Ssa#XM_014134158.1	Adenosine receptor A2a.2	-0.448314	0.0937895	-1.23335	0.000631115	-1.05932	0.00097266	-0.271958	0.320166	-1.23326	0.0238195
1390	Ssa#XM_014134167.1	Membrane-spanning 4-domains subfamily A member 4A	1.28887	0.125162	0.42701	0.481878	1.47951	0.0462466	-0.133262	0.854272	-1.41723	0.153317
1391	Ssa#XM_014134173.1	NUF2, NDC80 kinetochore complex component	-0.914492	0.000955461	-0.491671	0.00709939	0.186206	0.5451	-0.390017	0.187055	0.0197024	0.941993
1392	Ssa#XM_014134198.1	translation initiation factor IF-2-like	0.210984	0.0930527	0.811976	2.38955e-05	0.85589	0.000883077	0.615578	0.0186843	0.248004	0.0968751
1393	Ssa#XM_014134225.1	trophinin	0.17293	0.778993	1.03677	0.020487	1.38404	0.0101474	0.891027	0.0946676	0.803293	0.128337
1394	Ssa#XM_014134259.1	HAUS augmin-like complex, subunit 7	-0.801307	0.00766512	-0.743735	0.00204739	-0.800317	0.000870207	-0.771528	0.00172227	-0.683284	0.00345066
1395	Ssa#XM_014134266.1	cerebral cavernous malformations 2 protein-like	0.412343	0.137764	0.632021	0.00310226	0.794479	0.00651645	0.779388	0.00675942	0.901327	0.00449983
1396	Ssa#XM_014134305.1	Kinase D-interacting substrate of 220b	-0.050691	0.905788	0.353383	0.201457	0.95147	0.00922213	0.746516	0.0733244	0.814706	0.0509218
1397	Ssa#XM_014134323.1	Glutathione S-transferase Mu 5	0.415531	0.190331	1.0813	0.000538769	1.04063	0.00156255	1.26885	0.00144685	0.462339	0.237319
1398	Ssa#XM_014134345.1	cell wall adhesin EAP1-like	-0.506366	0.157024	-0.997017	4.70647e-05	-0.900708	0.000266484	-0.86684	0.000594555	-0.955614	0.000466317
1399	Ssa#XM_014134348.1	SPRY domain-containing SOCS box protein 1-like	-0.491307	0.366475	-1.15419	0.000231748	-1.323	0.0030289	-1.23199	0.00467263	-0.991502	0.00935853
1400	Ssa#XM_014134351.1	alpha-enolase	-0.392563	0.398222	-0.574187	0.239315	-0.896183	0.085916	-1.87969	0.00478579	-1.61481	0.0223743
1401	Ssa#XM_014134416.1	Mediator of RNA polymerase II transcription subunit 15	0.141264	0.756919	1.11909	0.00623601	0.920534	0.0286657	0.905306	0.0617181	0.671522	0.12228
1402	Ssa#XM_014134417.1	Transmembrane emp24 protein transport domain containing 9	0.477679	0.205317	0.938733	0.00127829	1.1439	0.000935178	1.01738	0.00597213	1.06136	0.003829
1403	Ssa#XM_014134451.1	Protein-L-isoaspartate	-0.0197671	0.908842	0.755607	0.00138798	0.878129	0.000260821	0.381237	0.0512889	0.119583	0.440724
1404	Ssa#XM_014134468.1	cytochrome c oxidase subunit 4 isoform 2, mitochondrial-like	0.93242	0.0255289	0.333786	0.366238	0.416133	0.256055	-0.278805	0.545424	0.112594	0.791517
1405	Ssa#XM_014134476.1	NSFL1 cofactor p47	-0.205316	0.641164	0.596304	0.0150896	0.139334	0.482036	0.857117	0.00497646	1.2829	0.000384211
1406	Ssa#XM_014134495.1	Neurotensin receptor type 1	0.01774	0.883135	0.3471	0.0280211	1.03627	0.000678493	0.844175	0.00225833	0.872747	0.00574541
1407	Ssa#XM_014134534.1	deoxyribonuclease gamma-like	-0.393566	0.124373	-1.07912	0.000107184	-0.971205	0.0371198	-1.25875	0.00067225	-1.41387	0.00152904
1408	Ssa#XM_014134537.1	ribosomal RNA methyltransferase 2	0.401819	0.332764	0.72874	0.0224308	0.530987	0.130818	0.817025	0.04232	0.803389	0.070096
1409	Ssa#XM_014134540.1	zinc finger MYM-type protein 1-like	0.123394	0.652099	0.306085	0.31628	0.120443	0.708562	0.850919	0.0685693	1.31755	0.00566904
1410	Ssa#XM_014134561.1	Protein UXT	0.17576	0.733235	0.610713	0.0206529	0.770519	0.0237938	1.14525	0.00647035	0.682682	0.0580345
1411	Ssa#XM_014134595.1	catechol O-methyltransferase-like	0.181978	0.724453	-1.06502	0.0293115	-1.04753	0.0573168	-1.78266	0.00794417	-0.887214	0.153942
1412	Ssa#XM_014134597.1	extracellular matrix protein 2-like	-0.538389	0.339876	-1.22079	0.000594441	-1.23899	0.00110398	-1.15408	0.00523258	-1.31694	0.0035664
1413	Ssa#XM_014134618.1	CTTNBP2 N-terminal-like protein	-0.978465	0.403013	-1.25298	0.0165755	-2.0768	0.00520682	-1.4829	0.042497	-1.9889	0.00667946
1414	Ssa#XM_014134632.1	complement C1q tumor necrosis factor-related protein 3-like	-3.50134	0.246895	-0.731435	0.802576	-4.17613	0.191585	-6.69955	0.0331582	-1.87064	0.62215
1415	Ssa#XM_014134633.1	C1Q and TNF related protein 3	-3.4143	0.287586	0.631639	0.815262	-2.83625	0.359227	-6.38275	0.0456693	-1.20493	0.75249
1416	Ssa#XM_014134678.1	Tumor protein p53-inducible nuclear protein 1	-1.0338	0.223805	-2.24117	0.000351495	-2.16888	0.0010163	-2.20405	0.0026265	-2.20723	0.00333591
1417	Ssa#XM_014134694.1	Transporter	-0.21315	0.442792	-0.835097	0.0398265	-0.789062	0.0106749	-0.291579	0.263613	-0.163378	0.410353
1418	Ssa#XM_014134723.1	Uridine-cytidine kinase 1-like 1a	0.304684	0.302109	0.822026	0.00304187	0.758759	0.0016826	1.29559	0.00183764	1.19754	0.0012173
1419	Ssa#XM_014134734.1	E3 ubiquitin-protein ligase RNF180-like	0.851665	0.0480122	1.73788	0.000131764	1.46282	0.00366347	0.996652	0.0635753	0.675889	0.150062
1420	Ssa#XM_014134753.1	Inhibitor of DNA binding 2, dominant negative helix-loop-helix protein, b	0.996034	0.236935	1.50191	0.00502612	1.58328	0.00652134	0.901259	0.0913297	0.959762	0.0771583
1421	Ssa#XM_014134762.1	complement component C7-like	-0.115204	0.878743	1.42687	0.0513678	2.07526	0.0214179	2.00276	0.0560589	1.37923	0.152015
1422	Ssa#XM_014134774.1	Protein SSUH2 homolog	0.323158	0.346089	-0.475793	0.0252597	-0.496309	0.00618874	-0.839853	0.00122365	-0.861986	0.000788326
1423	Ssa#XM_014134856.1	receptor-type tyrosine-protein phosphatase V-like	-0.977758	0.0929973	-1.76508	2.50996e-05	-1.86576	4.0759e-05	-1.68903	0.000172849	-1.93043	5.85525e-05
1424	Ssa#XM_014134894.1	small integral membrane protein 4	0.0535572	0.885247	0.739672	0.0709345	1.08594	0.0203165	1.46364	0.00691568	0.228065	0.799042
1425	Ssa#XM_014134933.1	Dystroglycan 1	-0.75015	0.349812	-1.80912	5.74455e-05	-1.85361	0.000198269	-1.74164	0.00103432	-1.87302	0.000614229
1426	Ssa#XM_014134945.1	Serine/arginine-rich splicing factor 6a	0.202357	0.242146	0.445622	0.00897098	0.692732	0.00851585	1.06413	0.000525787	0.664093	0.00335499
1427	Ssa#XM_014134967.1	Transketolase-like 1; Transketolase-like protein 1	0.202078	0.22775	-1.17689	4.97623e-06	-1.59331	3.1915e-05	-1.40564	9.83919e-05	-1.10737	0.000488117
1428	Ssa#XM_014134983.1	Protein slowmo homolog 2	-0.212953	0.510294	0.406559	0.0765298	0.535492	0.0485702	0.962943	0.0153623	0.497248	0.130391
1429	Ssa#XM_014134992.1	Structural maintenance of chromosomes protein 5	0.918818	0.126407	1.92739	4.48972e-05	1.75906	0.000200873	1.48549	0.00188133	1.32007	0.0105718
1430	Ssa#XM_014135018.1	Collagen type II, alpha-1a	0.547847	0.0155276	0.901309	3.94357e-06	0.773475	0.00231544	0.615233	0.000437065	0.364759	0.00396747
1431	Ssa#XM_014135019.1	G2/mitotic-specific cyclin-B1-like	-1.14254	0.0217943	-0.459384	0.154135	0.413273	0.209857	-1.33267	0.0585742	-1.54779	0.234522
1432	Ssa#XM_014135037.1	Nascent polypeptide-associated complex alpha polypeptide	0.560503	0.309345	1.48375	1.86939e-05	1.50124	4.66677e-05	1.84038	6.40513e-05	1.57114	0.000123705
1433	Ssa#XM_014135038.1	Prostaglandin E synthase 3b	-0.691513	0.0490143	-0.453796	0.0100526	-0.828598	0.0172137	-0.524013	0.0335185	-0.0224719	0.867686
1434	Ssa#XM_014135043.1	Natriuretic peptide receptor 1b	0.642216	0.0297123	0.61037	0.0216608	0.925302	0.00160982	0.632993	0.0343523	0.321459	0.269802
1435	Ssa#XM_014135092.1	Dysbindin-A - Ident 48	-1.22475	0.0313988	-2.06187	3.85658e-07	-2.06903	2.33741e-06	-1.88916	3.17076e-05	-1.86099	3.49109e-05
1436	Ssa#XM_014135103.1	5-aminolevulinate synthase, nonspecific, mitochondrial-like	-0.787624	0.0226694	-1.93978	0.000118341	-1.9791	4.62882e-05	-1.73776	0.000148616	-0.769814	0.0372053
1437	Ssa#XM_014135112.1	Peroxisome proliferator-activated receptor delta b	0.0877772	0.622283	0.878142	0.000582965	0.871742	0.00122396	0.638773	0.0022199	1.00315	0.000164017
1438	Ssa#XM_014135116.1	Transcription cofactor vestigial-like protein 4; V	0.475037	0.0216038	0.906776	0.000213209	0.882478	0.000993471	0.893693	0.00289092	0.376185	0.0486776
1439	Ssa#XM_014135123.1	Nuclear pore membrane glycoprotein 210	-0.481637	0.0854459	-0.761741	0.0083096	-0.902274	0.00292828	-0.81836	0.0166825	-0.753624	0.0145149
1440	Ssa#XM_014135229.1	60S ribosomal protein L22-like	0.398065	0.410833	0.956776	3.21521e-05	1.17288	3.87224e-05	1.14089	0.00011813	0.871249	0.00132266
1441	Ssa#XM_014135284.1	5'-nucleotidase domain-containing protein 2	-0.286739	0.279325	0.333937	0.0978553	0.889673	0.00131621	0.340891	0.197998	0.284153	0.18512
1442	Ssa#XM_014135288.1	properdin-like	-0.512188	0.0752678	-0.829645	0.000852235	-1.08432	0.000296678	-1.16063	0.000656514	-0.702777	0.0115831
1443	Ssa#XM_014135305.1	Nuclear receptor subfamily 1, group H, member 5	0.464915	0.187536	0.557797	0.0294951	1.22764	0.000332597	0.457478	0.162416	0.733427	0.0250033
1444	Ssa#XM_014135324.1	Cold shock domain containing E1, RNA-binding	0.657353	0.16047	1.34636	2.59293e-05	1.50023	0.000119754	1.4666	0.000696262	1.01317	0.00122945
1445	Ssa#XM_014135352.1	Msx2-interacting protein	0.713743	0.0465215	1.07615	0.00133822	0.911974	0.00415961	0.892009	0.00679925	0.933268	0.00408083
1446	Ssa#XM_014135368.1	Dolichyl-diphosphooligosaccharide--protein glycosyltransferase 48 kDa subunit	-0.960518	0.00417122	-0.744149	0.0185274	-0.978346	0.00946681	-1.18967	0.0186782	-0.363735	0.471906
1447	Ssa#XM_014135369.1	Pleckstrin homology domain-containing family M member 2	-0.450291	0.421396	-0.641287	0.0475012	-0.812137	0.0477065	-0.904161	0.0772518	-0.737798	0.0840608
1448	Ssa#XM_014135383.1	E3 ubiquitin-protein ligase MIB2	0.758027	0.0199222	0.874635	0.000242183	1.19507	0.000147235	0.563029	0.0200665	-0.483333	0.0295687
1449	Ssa#XM_014135386.1	UbiA prenyltransferase domain-containing protein 1	-0.35213	0.0387726	-0.681666	5.00674e-05	-1.12873	0.000282664	-0.540612	0.000337606	-0.575838	0.0120097
1450	Ssa#XM_014135392.1	Matrix metallopeptidase 23bb	-0.261179	0.561758	0.132509	0.722317	0.175624	0.699031	-0.927815	0.0886091	-1.384	0.0210192
1451	Ssa#XM_014135436.1	Leucine rich repeat containing 47	-0.0466738	0.926783	0.752735	0.034994	0.916043	0.0235143	0.863631	0.0533163	0.991839	0.0293762
1452	Ssa#XM_014135536.1	SUZ domain-containing protein 1-like	-1.60466	0.140549	-3.22062	8.09232e-05	-3.12747	0.000196571	-3.39592	0.000746867	-3.56058	0.000347111
1453	Ssa#XM_014135550.1	Mediator complex subunit 13b	0.363177	0.212448	0.869134	5.02919e-05	0.908413	0.000142133	0.8159	0.00250514	0.687308	0.00128186
1454	Ssa#XM_014135557.1	Complement component 4	-0.843093	0.00594531	-0.700267	0.000140497	-0.541348	0.000470581	-0.991204	2.97724e-05	-0.570864	0.00915235
1455	Ssa#XM_014135619.1	Cholinergic receptor, nicotinic, alpha polypeptide 2a	0.861913	0.0827876	1.70745	1.63542e-05	1.4358	4.9384e-05	1.36459	0.0154232	1.31282	3.97956e-05
1456	Ssa#XM_014135624.1	RING finger protein 223-like	-0.0355017	0.946748	-0.491979	0.0104472	-0.55537	0.0100845	-0.521229	0.079234	-0.906759	0.000477357
1457	Ssa#XM_014135631.1	V-abl Abelson murine leukemia viral oncogene homolog 2	-0.0293688	0.924867	1.01161	0.000152566	1.06318	0.000612286	1.28131	4.228e-05	1.03381	0.00090972
1458	Ssa#XM_014135637.1	Agrin	-0.246198	0.168189	-1.00505	7.84347e-06	-1.05214	4.11026e-05	-0.290194	0.0626768	-0.0956661	0.5444
1459	Ssa#XM_014135660.1	Transcription initiation factor TFIID subunit 10	0.366997	0.517243	0.802838	0.0206516	0.788765	0.0374405	0.620816	0.131201	0.664065	0.104876
1460	Ssa#XM_014135661.1	uncharacterized LOC106566963	0.472224	0.0866522	1.01452	0.000533591	0.639103	0.0363355	0.241628	0.267014	0.840859	0.00449517
1461	Ssa#XM_014135663.1	TAR DNA binding protein, like	0.080988	0.680096	0.422014	0.015024	0.42641	0.0620889	0.850106	0.00121502	0.666258	0.00170901
1462	Ssa#XM_014135666.1	renin binding protein (renbp)	0.543024	0.098598	0.710477	0.0186508	1.24492	0.00115064	1.21876	0.00478866	0.62772	0.0570428
1463	Ssa#XM_014135669.1	Tensin-like C1 domain-containing phosphatase	0.634222	0.00710668	0.676573	0.00470799	1.09869	0.000827931	0.147417	0.548636	-0.0932827	0.572433
1464	Ssa#XM_014135737.1	Ankyrin repeat and SOCS box protein 8	0.56008	0.35246	0.990719	0.00299239	1.21659	0.00209067	0.626865	0.150277	0.720403	0.0847368
1465	Ssa#XM_014135739.1	Activating transcription factor 7a	-1.12145	0.0911404	-2.20567	0.00112741	-2.14652	0.00149523	-2.39695	0.00661048	-2.09751	0.00375224
1466	Ssa#XM_014135747.1	Sodium channel, voltage-gated, type VIII, alpha a	-0.943607	0.0760354	-1.58018	0.000376565	-1.98509	8.27595e-05	-1.88408	0.000668162	-1.75026	0.000121236
1467	Ssa#XM_014135774.1	probable E3 ubiquitin-protein ligase DTX3	0.267084	0.697834	1.1887	0.0198881	1.66884	0.00596667	1.30959	0.0390738	1.38939	0.0302921
1468	Ssa#XM_014135788.1	N-alpha-acetyltransferase 10	0.132778	0.723523	0.75458	0.019914	0.443114	0.209204	0.990006	0.0218245	1.18354	0.00806322
1469	Ssa#XM_014135802.1	Surfeit 4, isoform CRA_c; Surfeit locus protein 4	-0.251656	0.232284	-0.517463	0.0302565	-0.884182	0.00176625	-0.803406	0.0112465	-0.353679	0.213536
1470	Ssa#XM_014135805.1	E3 ubiquitin-protein ligase HUWE1	-0.375372	0.114621	-0.807896	0.00107104	-0.793032	0.00598204	-0.673409	0.00275004	-0.679295	0.00317735
1471	Ssa#XM_014135838.1	Na/K ATPase alpha subunit isoform 2	0.537309	0.231655	1.0608	0.000448965	0.783856	0.00594589	0.7992	0.0154405	0.516632	0.0805729
1472	Ssa#XM_014135872.1	Transforming growth factor, beta receptor 1 a	0.934575	0.0231281	1.0071	0.00113516	1.14324	0.00108505	1.24489	0.00216238	0.858599	0.0482677
1473	Ssa#XM_014135890.1	Proliferation-associated protein 2G4	0.290332	0.536383	1.37927	0.000259809	1.32999	0.00131109	1.26687	0.0063802	1.42499	0.00282627
1474	Ssa#XM_014135892.1	Extended synaptotagmin-like protein 3	0.577943	0.185243	0.954823	0.00294288	0.89584	0.0216786	0.579443	0.14315	0.584509	0.107203
1475	Ssa#XM_014135894.1	Low density lipoprotein receptor-related protein 1b	0.292947	0.553514	0.203175	0.76926	0.883058	0.0106462	0.207957	0.517801	0.0704148	0.800358
1476	Ssa#XM_014135901.1	delta-type opioid receptor-like	-0.146186	0.78436	-0.765735	0.00824054	-0.917935	0.00432623	-0.728445	0.186574	-0.873391	0.0276975
1477	Ssa#XM_014135906.1	RNA-binding motif, single-stranded-interacting pro	-0.035761	0.812287	0.165933	0.172543	0.226982	0.144122	0.584654	0.0281731	1.00609	0.00922865
1478	Ssa#XM_014135922.1	Chromobox homolog 5 (HP1 alpha homolog_ Drosophila) - Ident 66	-0.411452	0.4727	-0.77704	0.0364846	-0.890509	0.0385819	-1.10405	0.0189219	-0.804815	0.0574019
1479	Ssa#XM_014135934.1	uncharacterized LOC106567072	0.417477	0.123288	1.03915	0.000493754	0.916499	0.00473955	1.74549	0.000153178	1.27947	0.00105864
1480	Ssa#XM_014135947.1	Zinc finger and BTB domain-containing protein 39	-1.23604	0.0359092	-1.76288	0.000229879	-1.76103	0.000229785	-1.72812	0.00169146	-1.98048	0.000431727
1481	Ssa#XM_014135957.1	Solute carrier family 11 (Proton-coupled divalent metal ion transporters)_ member 2	-0.129002	0.703039	-0.936266	0.00793393	-1.10396	0.00485814	-1.44062	0.00560998	-1.15929	0.0168079
1482	Ssa#XM_014135961.1	CTD small phosphatase 2	0.974464	0.000399497	0.96108	0.00238631	1.38478	3.71068e-05	0.913501	0.00238373	0.761459	0.0171618
1483	Ssa#XM_014135972.1	SAP domain-containing ribonucleoprotein-like	-0.242227	0.573721	0.242753	0.603732	-0.215166	0.631106	0.505187	0.317457	1.15511	0.0416528
1484	Ssa#XM_014135974.1	Tubulin, alpha 1a	-2.62066	0.00580432	-2.24891	0.00879591	-2.73944	0.00443522	-2.20338	0.0460254	0.196813	0.814373
1485	Ssa#XM_014135980.1	fat storage-inducing transmembrane protein 2-like	-0.776074	0.00491777	-0.539758	0.0687656	-1.60016	6.56742e-05	0.071328	0.853046	0.72748	0.0439656
1486	Ssa#XM_014136011.1	G0/G1 switch protein 2	0.410999	0.127028	0.242275	0.190344	0.213817	0.0742777	1.21908	0.000283074	0.216941	0.128246
1487	Ssa#XM_014136046.1	Cerebellin 1 precursor	0.84682	0.0673375	1.63889	2.8099e-06	1.59747	5.27387e-05	1.09182	0.00201097	0.989997	0.00194235
1488	Ssa#XM_014136050.1	ankyrin repeat domain-containing protein SOWAHB-like	1.55179	0.000986172	0.760349	0.0237979	1.0775	0.00627344	0.66085	0.0922172	0.800065	0.0415364
1489	Ssa#XM_014136101.1	HAUS augmin-like complex subunit 4	-0.886488	0.000709308	-0.261757	0.175575	-1.07064	0.000571688	0.158554	0.544649	0.54616	0.00485306
1490	Ssa#XM_014136108.1	Caspase	0.696063	0.0707374	0.749588	0.0149014	0.840256	0.0202224	1.56054	0.00202563	1.72308	0.000845868
1491	Ssa#XM_014136138.1	CDP-diacylglycerol--inositol 3-phosphatidyltransferase (Phosphatidylinositol synthase) - Ident 38	0.0427179	0.857001	-0.0741715	0.711557	-0.275841	0.285862	-1.22971	0.000881413	-1.15882	0.00126913
1492	Ssa#XM_014136148.1	heme transporter hrg1-B	1.20143	0.052744	1.68543	0.000848118	2.14393	0.000300703	1.84193	0.00217513	1.61276	0.00942153
1493	Ssa#XM_014136150.1	Rap guanine nucleotide exchange factor 3	0.62675	0.0872144	0.606944	0.0210305	0.6525	0.0275159	0.813714	0.0389484	0.554724	0.0661296
1494	Ssa#XM_014136170.1	DAZ-associated protein 2-like	0.517977	0.318805	1.15093	0.00709147	1.18012	0.013172	0.302286	0.518915	0.428832	0.348994
1495	Ssa#XM_014136173.1	Rac GTPase-activating protein 1	-0.86902	0.00176296	-0.280183	0.180965	0.266892	0.335969	-0.443785	0.261385	0.352829	0.119516
1496	Ssa#XM_014136178.1	Dipeptidyl aminopeptidase-like protein 6	0.00838464	0.988936	0.927995	0.0575407	0.027872	0.966353	0.786134	0.178294	1.69268	0.0114869
1497	Ssa#XM_014136182.1	Citrate synthase	-0.351537	0.0813941	-0.849499	0.000306681	-1.11117	0.00271737	-0.473271	0.00943211	-0.143217	0.301268
1498	Ssa#XM_014136193.1	General receptor for phosphoinositides 1-associated scaffold protein	0.474552	0.188497	0.571333	0.1035	1.11969	0.0138353	0.981721	0.0230606	0.0848588	0.819306
1499	Ssa#XM_014136200.1	PAB-dependent poly(A)-specific ribonuclease subuni	1.19206	0.0904166	2.3124	2.40588e-09	2.16498	3.01692e-08	2.4348	1.15403e-07	2.26418	2.612e-07
1500	Ssa#XM_014136208.1	Pleckstrin homology-like domain family B member 1	-0.123471	0.623926	-0.638098	0.00062152	-0.317353	0.0590092	-1.06372	0.00615717	-0.943227	0.00594274
1501	Ssa#XM_014136221.1	Lysine-specific demethylase 5B	-0.569674	0.337894	-0.79773	0.000333253	-0.728763	0.00403014	-1.14521	0.000788818	-1.37623	0.000373326
1502	Ssa#XM_014136245.1	tumor protein D54-like	1.65478	0.00532771	1.6572	0.000250252	2.29273	0.000893908	2.36177	0.00113756	1.50144	0.00805165
1503	Ssa#XM_014136263.1	Syntabulin	-0.745601	0.0383991	-1.22944	4.44862e-05	-1.2192	0.000738834	-1.3474	0.000296237	-1.1416	0.000928804
1504	Ssa#XM_014136276.1	Translocase of inner mitochondrial membrane 17 homolog A	0.361311	0.231884	0.445743	0.0450797	0.857809	0.008141	0.178089	0.487451	0.539631	0.0597773
1505	Ssa#XM_014136305.1	protein SET-like	0.822103	0.0313245	0.609692	0.0695628	0.667137	0.0465525	0.332564	0.299609	0.0349921	0.930402
1506	Ssa#XM_014136314.1	Rap1 GTPase-activating protein 1	1.25211	0.0392718	0.363723	0.143793	0.466351	0.0817386	0.820475	0.0301043	-0.0017439	0.995502
1507	Ssa#XM_014136322.1	Kruppel-like factor 11b	0.563633	0.390072	1.0594	0.0364422	2.31397	6.67559e-05	2.23986	0.000451715	1.05319	0.0254124
1508	Ssa#XM_014136362.1	Cell division cycle 42, like	-1.04512	0.00015939	-0.356982	0.0377781	-0.579342	0.00123873	-0.699713	0.00119417	-0.229622	0.234602
1509	Ssa#XM_014136365.1	Probable carboxypeptidase PM20D1	0.515181	0.269051	0.910432	0.00906976	0.681429	0.0583272	0.194776	0.571141	-0.284137	0.397872
1510	Ssa#XM_014136396.1	Eukaryotic translation initiation factor 3 subunit M [eIF3m] - Ident 33	0.208176	0.770455	-0.357641	0.573908	0.0861962	0.902502	3.85232	0.00181047	4.52066	0.00111049
1511	Ssa#XM_014136431.1	suppressor of cytokine signaling 2-like	-0.097948	0.811217	2.1126	6.9697e-05	3.35625	4.06949e-06	3.31192	0.00027423	2.45852	8.0122e-05
1512	Ssa#XM_014136436.1	nudix (nucleoside diphosphate linked moiety X)-type motif 3 (nudt3), X1	-0.443131	0.480181	0.645101	0.0140721	1.04522	0.00315763	1.3517	0.0107889	0.754558	0.0339212
1513	Ssa#XM_014136451.1	TNF decoy receptor	0.54141	0.0733172	0.616299	0.00788247	0.630911	0.0289159	1.30886	0.0131517	1.13405	0.00406238
1514	Ssa#XM_014136454.1	neural proliferation differentiation and control protein 1-like	0.811551	0.0705488	0.521411	0.139516	0.838217	0.0263369	0.541114	0.181418	0.0046233	0.992357
1515	Ssa#XM_014136481.1	DnaJ	-0.323851	0.413472	-0.911006	5.36505e-05	-0.765549	0.000760774	-0.743717	0.00211409	-0.769948	0.0019037
1516	Ssa#XM_014136484.1	alpha-(1,3)-fucosyltransferase 7-like (LOC106567339), X1	0.354687	0.0732893	0.864341	3.61235e-05	0.708624	3.03748e-05	0.722661	0.000161548	0.646581	0.000387153
1517	Ssa#XM_014136489.1	guanylyl cyclase-activating protein 2-like	-1.38396	0.00753526	-1.84759	0.00017219	-2.3602	1.34449e-05	-3.02488	4.63428e-05	-2.12846	0.000451799
1518	Ssa#XM_014136490.1	O-acetyl-ADP-ribose deacetylase 1-like	-0.847307	0.163614	-1.08309	0.0261653	-0.728096	0.168376	-0.0263331	0.953034	-0.0465491	0.921999
1519	Ssa#XM_014136494.1	zinc finger protein 395-like	0.604341	0.247007	-0.0704706	0.816385	0.866468	0.0192484	-0.602228	0.138895	0.20084	0.561301
1520	Ssa#XM_014136501.1	PTB domain-containing engulfment adapter protein 1 - Ident 29	1.41118	0.00439662	1.08336	0.0142399	0.969773	0.0337961	0.673517	0.214311	0.0174244	0.97606
1521	Ssa#XM_014136509.1	Nuclear oncoprotein skib	1.36055	0.00540057	0.462984	0.0527098	0.505721	0.0636243	0.441666	0.137237	0.114724	0.695995
1522	Ssa#XM_014136556.1	Large neutral amino acids transporter small subunit 1	1.50988	0.0741554	2.60555	1.66845e-07	2.04716	0.00103114	1.38553	0.0243216	0.388527	0.0686647
1523	Ssa#XM_014136624.1	Heterogeneous nuclear ribonucleoprotein D-like	-0.735838	0.00161921	-0.572316	0.00330256	-0.886436	0.000164144	-0.588186	0.023757	-0.314519	0.0312348
1524	Ssa#XM_014136650.1	High affinity copper uptake protein 1	0.659736	0.148475	0.559851	0.0197163	1.4748	4.53747e-05	1.1203	0.00115852	0.916907	0.00635447
1525	Ssa#XM_014136653.1	Heterogeneous nuclear ribonucleoprotein H1, like	-0.215056	0.347662	0.545863	0.0391396	-0.0922799	0.689602	0.653559	0.0434315	1.11852	0.0039563
1526	Ssa#XM_014136658.1	PWWP domain-containing protein 2A	0.394486	0.0173424	0.493581	0.00795516	0.326264	0.0349577	0.899641	0.00367229	0.590406	0.00342972
1527	Ssa#XM_014136680.1	Adrenergic receptor, beta 3a	-0.0933008	0.809559	-0.842932	0.086897	-0.524313	0.155635	-0.951945	0.0675149	-0.925155	0.0410656
1528	Ssa#XM_014136711.1	Prenylcysteine oxidase-like	0.297419	0.49837	0.885587	0.0075771	0.955713	0.00664389	0.732112	0.0474573	0.946683	0.0159486
1529	Ssa#XM_014136750.1	Kidney injury molecule	0.994535	0.148806	2.0906	1.20814e-07	1.9118	4.42104e-06	1.65536	5.79256e-05	1.46865	6.77663e-05
1530	Ssa#XM_014136789.1	Neuropathy target esterase	1.16439	0.0051358	1.32108	0.000628072	1.6707	0.000165511	1.05033	0.010279	0.655285	0.122768
1531	Ssa#XM_014136794.1	Heat shock protein 4a	-0.808485	0.00887927	-0.457248	0.0744319	-0.940698	0.000200887	-0.465213	0.0222353	-0.18337	0.286773
1532	Ssa#XM_014136804.1	protein Shroom1-like	-0.377136	0.334479	-0.70575	0.00337529	-0.833927	0.00446757	-0.731337	0.0174436	-0.79611	0.0102616
1533	Ssa#XM_014136822.1	SH3 and PX domain-containing protein 2B	-0.690974	0.0890783	-1.392	3.19335e-05	-1.4248	8.13625e-05	-1.55667	0.000144762	-1.32855	0.000970567
1534	Ssa#XM_014136883.1	Protein phosphatase 2	-1.11343	0.00589375	-0.896522	0.0109262	-1.11805	0.00316089	-0.308512	0.336282	-0.113711	0.766994
1535	Ssa#XM_014136906.1	Phosphatidylinositol binding clathrin assembly protein a	-0.0109856	0.945541	0.633554	0.00765291	0.601909	0.0114031	0.936736	0.00125156	0.706211	0.00172991
1536	Ssa#XM_014136937.1	Disks large homolog 1	0.093497	0.338564	0.26671	0.00186498	0.133754	0.0317151	0.866309	0.00731688	0.787714	0.000550058
1537	Ssa#XM_014136968.1	CDC42 binding protein kinase beta (DMPK-like)	-0.196805	0.62584	-0.472411	0.209632	-0.667935	0.0835465	-0.629418	0.107161	-0.869001	0.0235704
1538	Ssa#XM_014137020.1	Rab effector Noc2	0.458459	0.203109	0.925663	0.00194952	0.618233	0.107588	-0.165418	0.656773	-0.341798	0.25836
1539	Ssa#XM_014137050.1	Trafficking protein particle complex subunit 13	1.17196	0.164566	1.24109	0.00019419	1.27133	0.00833982	0.612058	0.0453296	0.239321	0.31092
1540	Ssa#XM_014137090.1	40S ribosomal protein S3	0.212745	0.652445	0.706689	0.0206766	0.750077	0.0249538	0.893444	0.0276385	0.687658	0.0707391
1541	Ssa#XM_014137110.1	Ovo-like 1(Drosophila); Putative transcription fac	-1.24609	0.0783281	-2.22259	3.33777e-05	-2.14317	0.000146588	-2.08138	0.000725119	-2.14673	0.000605643
1542	Ssa#XM_014137135.1	Creatine kinase, muscle a	0.258984	0.58522	-0.46873	0.365814	-0.391094	0.408369	-0.877178	0.145076	-1.33318	0.0381664
1543	Ssa#XM_014137166.1	Hypoxia up-regulated protein 1	-0.442158	0.369735	-1.00081	0.0419869	-1.74098	0.00255544	-1.01407	0.0617884	-0.363607	0.433588
1544	Ssa#XM_014137188.1	Roundabout-like protein 4	-0.388167	0.0511086	-0.533943	0.000476096	-0.860598	1.49529e-05	-0.857905	9.73565e-05	-0.258305	0.0585318
1545	Ssa#XM_014137208.1	Syntaxin 1B	-0.545332	0.00409684	-0.888671	1.90775e-05	-0.788819	1.92073e-05	-0.703279	0.00357402	-0.412943	0.0042526
1546	Ssa#XM_014137224.1	Protein orai-3	0.369149	0.218685	0.875877	6.86382e-05	0.812001	0.000619134	0.62292	0.00825855	0.559265	0.00749378
1547	Ssa#XM_014137249.1	Friend leukemia integration 1b	0.854396	0.0238696	0.843811	0.00648349	0.397997	0.248908	0.276084	0.373858	0.542855	0.0946858
1548	Ssa#XM_014137342.1	Centromere/kinetochore protein zw10 homolog	-0.378219	0.131416	-0.631465	0.00509441	-0.843419	0.00603085	0.103583	0.671992	0.394822	0.137815
1549	Ssa#XM_014137360.1	Zinc finger and BTB domain containing 16a	2.80065	0.000314856	1.22345	0.00112453	1.29842	0.00107011	0.908881	0.0228867	0.00493505	0.991452
1550	Ssa#XM_014137384.1	Rho GTPase-activating protein 33	0.469657	0.104905	0.439973	0.0332597	0.956035	0.00848501	0.767264	0.0465668	0.0240479	0.914047
1551	Ssa#XM_014137417.1	GRAM domain-containing protein 3	0.193953	0.430573	0.591092	0.0252997	0.895758	0.00723629	0.0553751	0.838726	-0.443069	0.125948
1552	Ssa#XM_014137435.1	Charged multivesicular body protein 1b	0.870063	0.209844	1.47376	5.96787e-05	1.4289	4.91735e-05	1.16245	6.74e-05	0.999986	0.00126445
1553	Ssa#XM_014137437.1	Ester hydrolase C11orf54 homolog (ck054)	-0.115948	0.733002	-0.970739	0.0168867	-1.58373	0.00508218	-1.94115	0.00143951	-1.57736	0.00494205
1554	Ssa#XM_014137470.1	Dystrophin-related protein 2	0.50712	0.296241	-0.251037	0.398394	-0.118697	0.705529	-0.791939	0.12126	-1.114	0.0120567
1555	Ssa#XM_014137499.1	Immunoglobulin-binding protein 1	0.18879	0.640527	1.02363	0.000428324	0.81461	0.00275177	1.01596	0.00243185	1.53929	0.000116493
1556	Ssa#XM_014137520.1	Rho GTPase-activating protein 20	0.845875	0.0162293	0.727197	0.000669388	0.864726	0.00498304	0.751512	0.0136708	0.480153	0.0292175
1557	Ssa#XM_014137536.1	anaphase-promoting complex subunit CDC26-like	1.09124	0.0928922	0.99163	0.00416749	1.01672	0.000755255	0.599115	0.0368337	0.513356	0.0629426
1558	Ssa#XM_014137559.1	SH3 domain-binding glutamic acid-rich-like protein	-0.854338	0.0173703	-0.723347	0.00847199	-0.672042	0.0451593	-0.161334	0.537419	0.209867	0.460426
1559	Ssa#XM_014137562.1	Protein FAM46D	0.523082	0.504993	1.07439	0.0352091	1.14117	0.0356712	1.19072	0.039391	0.502362	0.315094
1560	Ssa#XM_014137588.1	mitochondrial uncoupling protein 2-like	0.767489	0.0696758	0.910053	0.0139348	1.49342	0.00188698	0.764721	0.0780419	0.28248	0.479831
1561	Ssa#XM_014137634.1	UDP-glucuronosyltransferase-like	0.631145	0.326539	1.1382	0.000814606	1.25242	0.00103521	0.969579	0.00319221	0.861487	0.00812465
1562	Ssa#XM_014137639.1	Spliceosome-associated protein CWC15 homolog	0.842405	0.154751	1.36807	0.0046764	1.6149	0.00441676	1.65052	0.00916636	1.51071	0.0131876
1563	Ssa#XM_014137673.1	Ras homolog gene family, member Gb	0.340653	0.612585	0.98357	0.0350537	0.766321	0.116043	1.13618	0.05258	0.871092	0.120362
1564	Ssa#XM_014137681.1	Zinc finger protein 711	1.08766	0.0705242	1.33598	0.00109073	1.21505	0.0122759	0.713775	0.0123385	0.746911	0.00188473
1565	Ssa#XM_014137701.1	E3 ubiquitin-protein ligase RNF167-like	0.197871	0.186928	0.646051	1.61178e-05	0.828537	3.55186e-06	0.49925	5.02572e-05	0.406142	0.00199482
1566	Ssa#XM_014137703.1	Neuronal tyrosine-phosphorylated phosphoinositide-3-kinase adapter 1	-1.65597	0.0350786	-2.52486	3.02099e-06	-2.562	1.83031e-05	-2.57713	7.55755e-05	-2.86472	1.85156e-05
1567	Ssa#XM_014137728.1	Guanine nucleotide binding protein	-0.1187	0.637731	-0.577053	0.0051033	-0.595414	0.00588785	-0.866056	0.00403319	-0.592711	0.0149695
1568	Ssa#XM_014137768.1	Ribonuclease, RNase K b	-0.49404	0.00352388	-1.0003	0.000176896	-1.4036	1.05038e-06	-0.908224	0.000570987	-0.680996	0.00277962
1569	Ssa#XM_014137773.1	Solute carrier family 13	1.03366	0.00677602	1.2744	2.89342e-05	2.22127	2.67786e-07	1.36459	9.64287e-05	0.407107	0.0549462
1570	Ssa#XM_014137794.1	mitochondrial intermediate peptidase-like	-0.0305117	0.93933	0.515046	0.0710117	0.807437	0.0172043	0.733845	0.0624481	0.0108855	0.973366
1571	Ssa#XM_014137816.1	transmembrane protease, serine 2	-0.497496	0.0703942	-0.857692	0.000293412	-0.431008	0.099397	-0.430733	0.0657003	-0.795522	0.0121239
1572	Ssa#XM_014137858.1	Cytoskeleton-associated protein 2	-1.02684	0.0214625	-0.854206	0.0194176	0.191291	0.566331	-1.37743	0.0254406	-0.529274	0.105365
1573	Ssa#XM_014137863.1	Diacylglycerol O-acyltransferase 2	-0.308469	0.728707	-1.41966	0.0503171	-2.98846	0.00155681	-4.19738	0.0054679	-4.45033	0.00151285
1574	Ssa#XM_014137875.1	Receptor-interacting serine/threonine-protein kinase 4	0.880768	0.0221719	0.531964	0.115616	0.753429	0.0258849	0.725699	0.055353	0.461086	0.286917
1575	Ssa#XM_014137876.1	Coxsackie virus and adenovirus receptor	-0.387736	0.578173	-0.902218	0.0313912	-0.598928	0.126108	-0.531242	0.244023	-0.453442	0.297809
1576	Ssa#XM_014137883.1	Integrator complex subunit 2	0.469125	0.465262	1.47954	0.000125781	1.34826	0.000716574	1.48931	0.000953436	1.35188	0.00170951
1577	Ssa#XM_014137894.1	Peptidyl-tRNA hydrolase 2, mitochondrial	0.390758	0.567816	1.47844	0.000398986	1.65479	0.000565664	1.8398	0.00115806	1.78069	0.00125882
1578	Ssa#XM_014137905.1	Breakpoint cluster region	0.656518	0.12131	1.0584	0.00272426	1.68617	1.96691e-05	1.25777	0.000526044	0.386544	0.076168
1579	Ssa#XM_014137918.1	Adenosine receptor A2b	0.607785	0.156245	0.0506718	0.894748	0.473786	0.280549	0.877674	0.0492014	0.392698	0.445371
1580	Ssa#XM_014137919.1	Nuclear receptor corepressor 1	0.379279	0.372616	0.927365	0.00185738	1.06349	0.00205727	0.138057	0.613348	-0.231184	0.434687
1581	Ssa#XM_014137926.1	neuropeptide Y/peptide YY receptor Yb	0.505008	0.183641	0.656181	0.00602932	0.622878	0.00426717	0.610564	0.0467682	0.899671	8.37427e-05
1582	Ssa#XM_014137930.1	Centromere protein V	-1.06477	0.0488978	-1.89215	0.000103587	-1.67199	0.000251955	-1.25677	0.0086977	-0.937418	0.029358
1583	Ssa#XM_014137967.1	CCR4-NOT transcription complex subunit 8	-0.37156	0.596972	1.00854	0.000111557	0.937343	0.000310276	0.893145	0.00136444	1.08894	0.000535089
1584	Ssa#XM_014137996.1	Zinc finger protein 346 - Ident 95	-1.36016	0.00625749	-0.425869	0.318656	-1.58227	0.00149715	0.37308	0.429818	0.490388	0.289253
1585	Ssa#XM_014138073.1	proline-rich protein 7-like	-0.272459	0.413809	-1.02883	0.000364447	-0.861845	0.00265781	-0.754283	0.00946621	-1.10836	0.00132827
1586	Ssa#XM_014138097.1	Acetyl-CoA carboxylase beta	-0.462903	0.121173	-1.07624	0.00261972	-1.91679	4.54944e-05	-2.15911	8.98553e-05	-1.12625	0.00337077
1587	Ssa#XM_014138114.1	Ubiquitin carboxyl-terminal hydrolase 6	-0.191482	0.474128	-0.380872	0.0419841	-0.241313	0.358787	-1.54152	5.31887e-05	-1.24195	0.000211518
1588	Ssa#XM_014138122.1	Junction mediating and regulatory protein, p53 cofactor	0.934612	0.0149396	0.881498	0.00153841	1.79651	3.81058e-05	0.44137	0.105191	-0.281911	0.322824
1589	Ssa#XM_014138145.1	Trace amine associated receptor 20r - Ident 75	-0.44875	0.382173	-1.06729	8.87559e-06	-0.988721	3.55477e-06	-1.11271	2.02469e-05	-1.29511	5.32818e-06
1590	Ssa#XM_014138148.1	protocadherin gamma-B7-like	-0.573377	0.363494	-1.1826	3.28996e-05	-1.20194	0.000555189	-1.42098	6.70963e-05	-1.66794	1.60377e-05
1591	Ssa#XM_014138158.1	Dimethylglycine dehydrogenase, mitochondrial	0.229205	0.611189	0.55735	0.0772676	0.140971	0.666337	-0.577116	0.11408	-0.929505	0.0171419
1592	Ssa#XM_014138166.1	Lipoma HMGIC fusion partner-like 2 protein	-0.613741	0.186818	-1.85729	8.33163e-07	-2.15781	4.51869e-06	-1.99459	7.4995e-07	-1.78104	5.68243e-06
1593	Ssa#XM_014138168.1	Solute carrier family 26	-0.0442012	0.758312	0.536154	0.000828022	0.433446	0.0261853	1.08391	6.76014e-05	1.01033	0.0004377
1594	Ssa#XM_014138231.1	Nicotinamide nucleotide transhydrogenase	-0.698732	0.00858732	-0.520086	0.00684224	-0.523163	0.0513048	-1.10054	0.00590711	-0.545457	0.0287411
1595	Ssa#XM_014138262.1	ran-binding protein 3-like	1.26185	0.0101364	0.362527	0.396774	1.25613	0.00615337	0.490919	0.252341	0.286967	0.550338
1596	Ssa#XM_014138273.1	WD repeat-containing protein 41	0.328144	0.413068	1.02334	0.0077631	1.4837	0.00128942	0.770767	0.0540734	0.689887	0.0737361
1597	Ssa#XM_014138318.1	Serine/arginine-rich splicing factor 9	0.144023	0.560309	0.373476	0.0288976	0.575124	0.00165311	0.960453	0.0018046	1.05528	0.000178488
1598	Ssa#XM_014138367.1	Proteinase-activated receptor 1	-0.328223	0.218788	-0.882464	0.00308852	-1.18678	0.00181897	-1.0758	0.000892898	-0.329354	0.232236
1599	Ssa#XM_014138415.1	relaxin-3 receptor 1-like	-0.453435	0.123845	-0.382598	0.054203	-0.559891	0.0307818	-0.500218	0.0695145	-0.899566	0.00445829
1600	Ssa#XM_014138418.1	Serine/threonine-protein phosphatase PGAM5, mitochondrial	0.161771	0.618407	0.7726	0.0240724	0.952514	0.0137707	0.654805	0.0973545	0.692064	0.0906175
1601	Ssa#XM_014138449.1	Voltage-dependent anion channel 3	0.105837	0.720174	0.589528	0.00685873	0.438729	0.179022	0.789675	0.00380469	0.979549	0.00468013
1602	Ssa#XM_014138472.1	Cyclin-dependent kinase 2 associated protein 2	-0.582539	0.0417074	-0.0188868	0.928952	0.0181935	0.925715	0.52882	0.1263	0.964354	0.0065274
1603	Ssa#XM_014138488.1	Density-regulated protein	-0.494024	0.0444142	-0.437033	0.056107	-0.853946	0.00961804	-0.20999	0.398882	0.466849	0.0831246
1604	Ssa#XM_014138491.1	Homeobox containing 1 b	0.629189	0.271564	0.986768	0.000117823	1.05694	0.000402216	0.831477	0.00595204	0.523825	0.0348724
1605	Ssa#XM_014138500.1	ATP-dependent RNA helicase DDX55	0.00708664	0.983883	0.642501	0.0225549	0.622185	0.0431975	0.718783	0.0456999	0.852907	0.0201043
1606	Ssa#XM_014138515.1	Trehalase	0.352501	0.402906	1.13092	3.15693e-05	0.900408	0.00176822	1.17792	0.00333687	1.14036	0.000557418
1607	Ssa#XM_014138516.1	Kinesin-like protein KIF2A	-0.136008	0.774922	-0.778362	1.00043e-05	-0.772049	4.12052e-05	-0.706482	0.00132973	-0.815531	4.70285e-05
1608	Ssa#XM_014138585.1	Transmembrane protein 150C	1.20296	0.0713538	1.47242	3.52888e-05	1.71104	3.75225e-05	1.56216	0.000558964	1.30856	0.00134942
1609	Ssa#XM_014138625.1	protein prune homolog 2-like	1.34634	0.00169052	0.694173	0.033633	0.673186	0.0924615	-0.216126	0.539865	-0.60094	0.0812721
1610	Ssa#XM_014138636.1	Fructose-1,6-bisphosphatase 2	0.681207	0.0319644	1.0674	0.00108005	0.989581	0.00586443	0.4894	0.143443	-0.191804	0.612056
1611	Ssa#XM_014138644.1	zinc finger protein 8-like	0.342043	0.294554	-0.821417	0.00120617	0.0527831	0.755634	0.436602	0.0558126	-0.275583	0.227805
1612	Ssa#XM_014138649.1	Disabled homolog 2	-0.131639	0.701642	-0.28377	0.289388	-0.39666	0.205748	-1.00208	0.022021	-0.919644	0.016305
1613	Ssa#XM_014138700.1	RasGEF domain family, member 1Ba	-0.560349	0.207128	0.608478	0.210495	1.29583	0.0194324	1.84126	0.003732	1.87394	0.00376696
1614	Ssa#XM_014138713.1	activated RNA polymerase II transcriptional coactivator p15-like	0.606293	0.247783	0.898549	0.0334112	0.91145	0.0497093	0.607155	0.181029	0.675711	0.143498
1615	Ssa#XM_014138717.1	ATP-dependent RNA helicase DHX29	-0.922009	0.00887116	-1.03159	0.00181844	-1.30475	2.38568e-05	-0.918395	0.00519237	-0.822265	0.0103373
1616	Ssa#XM_014138719.1	Superkiller viralicidic activity 2-like 2	0.611911	0.277511	1.54083	4.22024e-05	1.67587	0.000156633	1.86013	0.00015657	1.61797	0.00049967
1617	Ssa#XM_014138721.1	Lipid phosphate phosphohydrolase 1	0.870322	0.000219743	0.590129	0.00465844	1.04812	0.000110839	0.588875	0.017032	0.230692	0.10253
1618	Ssa#XM_014138725.1	Nucleoredoxin-like protein 2	-0.191123	0.535736	-0.265935	0.297243	0.346874	0.215984	1.04664	0.0230501	0.329682	0.304452
1619	Ssa#XM_014138755.1	uncharacterized protein DDB_G0286901	-0.504874	0.16606	-1.3839	0.000161762	-1.20982	0.00472232	-1.07282	0.00205136	-1.2342	0.00097655
1620	Ssa#XM_014138761.1	Pseudopodium-enriched atypical kinase 1	-0.485996	0.175634	-0.95669	0.000168851	-1.02918	0.00144239	-1.07994	0.0119211	-1.13804	9.41091e-05
1621	Ssa#XM_014138771.1	Endoplasmic reticulum metallopeptidase 1	0.698356	0.377662	1.2508	0.0184349	1.27269	0.0263367	0.681927	0.247102	0.350442	0.53414
1622	Ssa#XM_014138788.1	Protein-tyrosine sulfotransferase 2	-0.0745738	0.732863	0.128309	0.606175	-0.173027	0.420685	0.430145	0.159374	0.86113	0.0166415
1623	Ssa#XM_014138815.1	Set1/Ash2 histone methyltransferase complex subunit ASH2	0.370602	0.0927094	0.602348	0.000334814	0.704456	0.000837628	1.04586	0.000226417	1.18702	5.12454e-05
1624	Ssa#XM_014138832.1	CBP80/20-dependent translation initiation factor	-0.825143	0.142827	-1.53003	2.99145e-05	-1.39638	9.93341e-05	-1.28366	0.000611541	-1.37406	0.000698619
1625	Ssa#XM_014138836.1	Mothers against decapentaplegic homolog 7	-1.06732	0.118138	-2.05893	1.8724e-06	-2.2232	1.11764e-06	-1.91962	0.000153445	-2.1779	0.000337848
1626	Ssa#XM_014138852.1	Neural precursor cell expressed, developmentally down-regulated 4-like	1.21193	0.178479	0.667734	0.000161861	0.775151	0.000142149	0.749768	0.000861244	0.804117	0.0241461
1627	Ssa#XM_014138925.1	AF4/FMR2 family member 1	-0.3444	0.31825	-0.588015	0.00552041	-0.665691	0.00685752	-0.518047	0.0458537	-0.808147	0.00664792
1628	Ssa#XM_014138930.1	Tubulin, alpha 1a	-0.295674	0.307524	-0.404982	0.134174	-0.938659	0.0114818	0.250056	0.497728	0.443657	0.319277
1629	Ssa#XM_014138946.1	cyclin-I-like	0.562894	0.0162202	0.567073	0.0141989	0.827987	0.00255433	1.03495	0.0044821	0.327609	0.118982
1630	Ssa#XM_014139016.1	guanine nucleotide binding protein (G protein), gamma 10 (gng10), X1	0.665117	0.0987746	0.835984	0.016755	0.776142	0.00794827	0.620174	0.0485087	0.784222	0.0314661
1631	Ssa#XM_014139065.1	Interleukin 11 receptor, alpha	-0.611262	0.29955	-0.809162	0.0474256	-0.988908	0.0315384	-1.29775	0.0230415	-1.50314	0.00882749
1632	Ssa#XM_014139079.1	Symplekin	-0.200357	0.622408	-0.807269	0.000260231	-0.917887	0.000569264	-0.770016	0.00512572	-0.630271	0.00579869
1633	Ssa#XM_014139092.1	Myc proto-oncogene protein	-0.467389	0.149603	-0.16915	0.405904	-0.381766	0.0955615	-0.883063	7.98283e-05	-0.549011	0.00175199
1634	Ssa#XM_014139174.1	LIM zinc-binding domain-containing Nebulette-like	0.318252	0.468096	0.719924	0.0598887	0.301502	0.452385	1.41145	0.0138044	0.745829	0.136741
1635	Ssa#XM_014139265.1	ATP-dependent zinc metalloprotease YME1L1	0.624774	0.187808	1.04678	0.000199237	0.84251	0.00963638	0.302805	0.409121	-0.0908322	0.666569
1636	Ssa#XM_014139297.1	Phosphoglucomutase 1	0.980745	0.00916489	-0.453563	0.0939251	-0.355116	0.3053	0.869548	0.0170907	-0.240322	0.519623
1637	Ssa#XM_014139300.1	Tyrosine-protein kinase Jak1	-1.84974	0.0859467	-2.92052	1.27498e-05	-2.59173	4.06152e-05	-3.17604	9.52448e-05	-3.46873	4.22051e-05
1638	Ssa#XM_014139302.1	cAMP-specific 3 ,5 -cyclic phosphodiesterase 4A	-0.0111063	0.973882	-0.33118	0.11585	-0.656327	0.0288436	-0.927027	0.00643961	-0.405936	0.0891907
1639	Ssa#XM_014139311.1	UDP-N-acetylglucosamine/UDP-glucose/GDP-mannose transporter-like	0.810556	0.160894	0.679225	0.044012	1.20672	0.00428918	1.36457	0.0143315	0.988276	0.0204097
1640	Ssa#XM_014139312.1	REX4, RNA exonuclease 4 homolog (S. cerevisiae) (rexo4)	-0.266082	0.610495	0.545386	0.0133398	0.540291	0.0357339	1.13912	0.000148952	0.663663	0.0131148
1641	Ssa#XM_014139328.1	beta-1,3-galactosyltransferase 2-like	-0.337402	0.234514	-0.613424	0.0459931	-0.55163	0.102312	-0.255972	0.431635	-0.900842	0.031121
1642	Ssa#XM_014139355.1	Major facilitator superfamily domain-containing protein 8 - Ident 20	-0.0170767	0.790198	-0.0286524	0.637053	-0.0546219	0.482299	0.470006	0.270233	1.68171	0.0431048
1643	Ssa#XM_014139359.1	NACHT, LRR and PYD domains-containing protein 1	0.317917	0.294827	1.01689	0.0234203	0.771712	0.0564602	0.804578	0.0908047	1.04731	0.00430415
1644	Ssa#XM_014139379.1	Eukaryotic initiation factor 4A-III	1.44857	0.00865357	0.964915	0.0223654	1.13699	0.017973	1.17269	0.0340565	0.862448	0.0770658
1645	Ssa#XM_014139399.1	UMP-CMP kinase	-1.17923	0.0111299	-1.43658	0.000889661	-1.87712	0.000292843	-1.97217	0.0016382	-1.17647	0.00792267
1646	Ssa#XM_014139403.1	DIS3-like exonuclease 1	-0.668697	0.00613828	-0.103865	0.390355	-0.570662	0.00229739	-0.907942	0.00111744	-0.436783	0.0052626
1647	Ssa#XM_014139451.1	Protein sidekick-2	0.797559	0.0418687	1.6177	1.96306e-06	1.17305	0.000869196	0.948464	0.0290907	0.520516	0.00422484
1648	Ssa#XM_014139460.1	Mohawk homeobox b	-0.238603	0.703028	-1.40171	0.00205084	-0.841465	0.0258678	-1.11007	0.0192216	-1.14199	0.0332644
1649	Ssa#XM_014139484.1	Procollagen, type V, alpha 1	-0.290867	0.340054	-0.738128	0.00231266	-0.706632	0.0112031	-1.21985	0.000480256	-0.939497	0.00264849
1650	Ssa#XM_014139534.1	Presequence protease, mitochondrial	-0.796718	0.0116453	-0.00044125	0.998392	0.279622	0.239306	0.827331	0.128086	1.163	0.00313055
1651	Ssa#XM_014139578.1	Eph receptor B2b	-0.726764	0.174324	-0.99566	0.0110494	-1.05314	0.00490191	-0.806676	0.043417	-0.890024	0.0207904
1652	Ssa#XM_014139581.1	Glypican-1	-0.0351185	0.91094	-0.332014	0.249559	-0.0243196	0.912778	-0.943951	0.00584993	-1.00334	0.00577218
1653	Ssa#XM_014139686.1	dihydropyrimidine dehydrogenase	0.0495738	0.831494	0.840387	2.0757e-05	1.29753	1.20759e-06	0.901961	0.0232729	0.0224754	0.900212
1654	Ssa#XM_014139691.1	Lipid phosphate phosphatase-related protein type 4b	-1.35244	0.0973956	-2.39235	4.75831e-07	-2.4522	3.24313e-06	-2.33503	1.42991e-05	-2.29274	1.65104e-05
1655	Ssa#XM_014139701.1	Glycogen debranching enzyme	0.341784	0.607853	0.714573	0.0140353	0.490128	0.0858096	0.625741	0.12498	1.22447	0.00400696
1656	Ssa#XM_014139709.1	Ectoderm-neural cortex protein 1	-0.109439	0.742282	-0.564984	0.0194161	-0.204903	0.414623	-0.792407	0.0116521	-1.06355	0.00196701
1657	Ssa#XM_014139716.1	Retinoic acid receptor RX	0.487761	0.249788	0.788761	0.0380496	0.854897	0.0489155	0.720879	0.143375	0.332395	0.452936
1658	Ssa#XM_014139769.1	Adaptor-related protein complex 2, mu 1 subunit, a	-0.750789	0.266545	-0.520805	0.135217	-0.666064	0.184397	-1.56749	0.00413194	-0.417746	0.423504
1659	Ssa#XM_014139776.1	Phosphate cytidylyltransferase 1, choline, alpha b	-1.14151	0.00244401	-1.31662	0.000456832	-1.87109	4.83872e-05	-1.34888	0.00305589	-0.79524	0.0233863
1660	Ssa#XM_014139778.1	retinol-binding protein 1-like	-0.268949	0.545724	-1.20707	0.000562924	-0.554008	0.0722804	-0.474925	0.208795	-0.878848	0.0188618
1661	Ssa#XM_014139780.1	Calsyntenin 1	-0.561395	0.11297	-1.47728	3.47913e-05	-1.80726	5.15872e-06	-1.7304	8.00384e-05	-1.95746	2.74045e-05
1662	Ssa#XM_014139785.1	SplA/ryanodine receptor domain and SOCS box containing 4a	-0.100821	0.812513	-1.45403	9.26336e-05	-1.11078	0.00118661	-1.18047	0.00406819	-1.44896	0.00275027
1663	Ssa#XM_014139799.1	RAB11a, member RAS oncogene family, like	-0.504569	0.171568	-1.08921	5.26096e-05	-0.876748	0.000500281	-0.478253	0.0678198	-0.718425	0.00542636
1664	Ssa#XM_014139800.1	Translocase of inner mitochondrial membrane 44 homolog	1.18433	0.00154827	1.91873	1.86425e-06	1.87415	3.44809e-06	1.92343	0.000177908	1.00539	0.000854377
1665	Ssa#XM_014139806.1	Regulator of nonsense transcripts 1	-0.567057	0.0100617	-0.347673	0.0243075	-0.919314	7.63762e-05	-0.571759	0.0312349	-0.399049	0.0360631
1666	Ssa#XM_014139811.1	JunD-2	0.400284	0.129201	-0.381069	0.422287	-2.07503	1.93035e-05	-1.78367	0.000464988	-0.531204	0.0586563
1667	Ssa#XM_014139832.1	Fish virus induced TRIM-7	0.971641	0.0109772	1.46092	0.000851417	2.34326	0.000570274	1.4923	0.0174668	0.191624	0.522451
1668	Ssa#XM_014139838.1	Mediator of RNA polymerase II transcription subunit 26	0.319269	0.315317	0.869434	0.00340933	0.63161	0.0132621	0.603835	0.0285237	0.230072	0.278798
1669	Ssa#XM_014139846.1	40S ribosomal protein S28	0.383823	0.286261	0.900989	8.87981e-05	1.0769	0.000221039	1.29104	5.68983e-05	1.04563	0.000486969
1670	Ssa#XM_014139858.1	plasmalemma vesicle-associated protein-like	0.0714098	0.811852	0.16539	0.544926	1.05408	0.0147742	0.593239	0.315357	0.163642	0.610272
1671	Ssa#XM_014139892.1	Gelsolin precursor	0.123424	0.680855	0.89715	0.00181709	0.782456	0.00536927	0.898059	0.00957105	0.98891	0.00391972
1672	Ssa#XM_014139909.1	60S ribosomal protein L5-like	-1.36032	0.00105249	-0.727653	0.0139476	-1.05661	0.0115068	-0.767841	0.077743	-0.364304	0.223475
1673	Ssa#XM_014139926.1	GTPase IMAP family member 8-like	1.33391	0.0220554	1.67804	2.39355e-08	1.52231	6.65089e-05	0.94196	0.0173559	0.584806	0.0019532
1674	Ssa#XM_014139935.1	Coatomer protein complex, subunit beta 2	-0.493936	0.212107	-0.751747	0.14824	-1.11148	0.018592	-0.376695	0.269244	-0.469504	0.213485
1675	Ssa#XM_014139952.1	retinol binding protein 2, cellular	-0.284018	0.41318	-0.929808	0.000225771	-0.893338	0.000404042	-0.890038	0.00313926	-0.572003	0.00469211
1676	Ssa#XM_014139953.1	Ankyrin repeat family A protein 2	0.642754	0.0968524	0.86186	0.0270578	1.2797	0.00173372	0.669215	0.0840702	0.23649	0.528468
1677	Ssa#XM_014139983.1	Hydroxyacid-oxoacid transhydrogenase, mitochondrial	0.544538	0.40012	0.998874	0.0427314	1.4024	0.0152249	1.38867	0.0228109	1.23585	0.0388351
1678	Ssa#XM_014139999.1	25-hydroxycholesterol 7-alpha-hydroxylase	-0.502987	0.00770696	-0.793302	0.000295561	-1.06001	0.000100605	-0.86676	0.00437905	-0.256402	0.286241
1679	Ssa#XM_014140002.1	TCR	0.601283	0.171647	0.838214	0.00167597	0.896003	0.00657564	0.885817	0.0105385	0.810233	0.0331594
1680	Ssa#XM_014140005.1	Protein SMG7	-0.281764	0.670189	-2.11654	0.00373906	-1.91697	0.00688891	-1.41807	0.0640421	-1.50523	0.0854262
1681	Ssa#XM_014140010.1	Deoxycytidine kinase	-0.944278	0.0042925	-0.450906	0.0273538	-0.977019	0.064791	-0.51761	0.162388	0.355004	0.0890364
1682	Ssa#XM_014140028.1	centromere protein L-like	-0.713308	0.0540686	-1.28994	0.000597312	-0.979904	0.00968281	-1.16487	0.00396038	-0.890192	0.0121842
1683	Ssa#XM_014140065.1	Serine/threonine-protein kinase PLK3	0.311808	0.268986	0.899556	0.00375643	0.79803	0.0101025	0.251564	0.399541	0.254832	0.345519
1684	Ssa#XM_014140072.1	kinesin-like protein KIF2C	-0.508841	0.0562327	-0.737606	0.00236082	-0.277578	0.289292	-1.3001	0.00185033	-0.663274	0.0123513
1685	Ssa#XM_014140126.1	DNA replication licensing factor MCM4	-0.898205	0.0959071	-0.190533	0.6163	-1.2917	0.0094466	0.0294306	0.935468	0.156677	0.665947
1686	Ssa#XM_014140131.1	Microtubule-associated protein, RP/EB family, member 1b	-0.284357	0.677337	0.374115	0.27608	0.60389	0.0762479	0.852634	0.0437633	0.590339	0.162037
1687	Ssa#XM_014140158.1	Latrophilin-2	-0.996054	0.0459351	-1.96091	3.03883e-06	-2.14151	0.00023112	-1.9782	0.000228087	-2.00518	1.80774e-05
1688	Ssa#XM_014140163.1	Oxoglutarate	-1.02268	0.000780635	-1.81827	7.17624e-05	-2.80681	7.67639e-07	-1.69644	0.00329454	-1.62976	0.0027147
1689	Ssa#XM_014140215.1	Desmoplakin	-0.752641	0.207013	-1.74518	1.3642e-05	-1.67304	0.000188157	-1.86966	0.000209019	-1.64584	0.00033137
1690	Ssa#XM_014140221.1	Solute carrier family 22 member 23	-0.168971	0.712651	-0.406997	0.269139	-0.710845	0.0907896	-0.711529	0.130757	-1.17804	0.0222725
1691	Ssa#XM_014140223.1	desmocollin-2-like	0.191051	0.475989	0.915774	0.00233824	0.476385	0.0397719	0.861403	0.0135411	0.0308464	0.889864
1692	Ssa#XM_014140233.1	Proteasome subunit alpha type-7	0.199649	0.591321	0.81483	0.0122023	0.537248	0.0356995	1.68815	0.000117215	1.20955	0.00624255
1693	Ssa#XM_014140234.1	Protein SSXT	-0.0795898	0.868283	-0.560408	0.000620193	-0.682408	0.0010886	-0.719356	0.0249559	-0.802274	0.000173124
1694	Ssa#XM_014140277.1	Vacuolar protein sorting 4b	0.336617	0.0525213	0.537647	0.00599702	0.892567	5.77699e-05	0.022164	0.914948	-0.245858	0.264692
1695	Ssa#XM_014140316.1	U6 snRNA-associated Sm-like protein LSm1	0.109882	0.699438	0.49922	0.0646975	0.518515	0.0816742	0.880209	0.00697065	1.02901	0.00690532
1696	Ssa#XM_014140385.1	cysteine-rich secretory protein LCCL domain-containing 1-like (LOC106599318)	-0.357735	0.281928	-1.17774	0.00240054	-1.61589	0.000804824	-1.12783	0.0124646	-1.01997	0.0234214
1697	Ssa#XM_014140413.1	Disks large-associated protein 1	-0.359449	0.646819	-1.05474	0.00198829	-0.945442	0.00590924	-1.36147	0.000449863	-1.57725	0.000101487
1698	Ssa#XM_014140543.1	GATA-binding protein 5	0.474265	0.437163	0.827263	0.0124375	0.588076	0.0631277	0.446683	0.207121	0.0676713	0.829486
1699	Ssa#XM_014140562.1	Ubiquitin carboxyl-terminal hydrolase	-0.828498	0.00144022	-0.74646	0.00986522	-1.11037	6.9859e-05	-0.498985	0.0284826	-0.125402	0.476756
1700	Ssa#XM_014140575.1	HIG1 domain family member 1A, mitochondrial-like	-0.0230125	0.899723	-0.00306541	0.985127	-0.154829	0.47877	0.941034	0.00861964	0.460016	0.00962591
1701	Ssa#XM_014140577.1	5-beta-cholestane-3-alpha,7-alpha-diol 12-alpha-hydroxylase-like	0.437028	0.0951827	1.30758	0.000912496	1.75625	0.00012394	0.948492	0.00039207	-0.0494981	0.820712
1702	Ssa#XM_014140666.1	Carbonic anhydrase 12	0.726795	0.322983	-1.40947	0.0116947	-1.86145	0.00367798	-1.91122	0.00911814	-1.85312	0.0102935
1703	Ssa#XM_014140690.1	Myeloid-associated differentiation marker	-0.119247	0.384792	-0.738039	0.000413272	-0.943456	0.000119993	-0.895349	0.0123801	-0.300113	0.177703
1704	Ssa#XM_014140718.1	zinc finger protein 16-like	0.992122	0.033583	0.765571	0.0116268	1.02048	0.00351595	1.12316	0.00535379	1.11666	0.00638377
1705	Ssa#XM_014140748.1	protein zyg-11 homolog	0.358128	0.571667	0.214578	0.349192	0.613309	0.0197443	0.844716	0.018646	0.73929	0.024948
1706	Ssa#XM_014140754.1	Peroxiredoxin 6	-0.635166	0.00203191	-0.665823	8.66429e-07	-0.693853	0.000137893	-0.987792	0.00254001	-0.707118	0.000494859
1707	Ssa#XM_014140776.1	Protein arginine N-methyltransferase 5	-0.906331	0.00992165	-0.160635	0.670674	-0.981667	0.0267932	0.0956411	0.841139	0.20964	0.613843
1708	Ssa#XM_014140780.1	Adaptor-related protein complex 1_ gamma 1 subunit - Ident 68	-0.391784	0.0663263	-0.751718	0.00272143	-0.788525	0.00314899	-1.24427	0.000181163	-1.00876	0.00105155
1709	Ssa#XM_014140834.1	Polymerase	-0.576209	0.00883802	-0.574904	0.00139631	-0.877725	0.000297708	-0.103098	0.472414	-0.0856258	0.5941
1710	Ssa#XM_014140842.1	Leukocyte cell derived chemotaxin 1	0.0600244	0.35138	0.0342709	0.43358	0.0432146	0.45647	0.865465	0.0105058	1.90071	0.000631018
1711	Ssa#XM_014140873.1	carbonic anhydrase 4-like	0.686915	0.375345	-1.16169	0.0208621	-1.40292	0.0128958	-1.48488	0.0235278	-1.44017	0.0231754
1712	Ssa#XM_014140878.1	carbonic anhydrase 4-like	0.547624	0.468778	-1.26395	0.0156763	-1.58267	0.00794146	-1.57677	0.0181363	-1.54325	0.0189524
1713	Ssa#XM_014140964.1	BTB/POZ domain-containing protein 1	0.0557504	0.820495	0.609258	0.00111925	0.700345	0.00377394	0.703553	0.0149863	0.929151	0.000202301
1714	Ssa#XM_014140983.1	One cut domain, family member 1	-0.280997	0.496441	-0.892874	0.0153515	-0.697637	0.0571886	-0.454198	0.255561	-0.287176	0.483915
1715	Ssa#XM_014141014.1	Cold-inducible RNA binding protein	0.587423	0.153527	1.17925	0.000477941	1.00103	0.00440751	0.949249	0.0162785	0.900572	0.0122436
1716	Ssa#XM_014141017.1	yjeF N-terminal domain-containing protein 3-like	-0.359778	0.422621	1.29323	0.0161956	1.94946	0.0019985	0.617506	0.318074	0.392983	0.440055
1717	Ssa#XM_014141020.1	GATA zinc finger domain containing 2Ab	-0.838415	0.00476268	-0.127175	0.414229	0.0234304	0.89054	-0.460279	0.0741913	-1.00856	0.00203008
1718	Ssa#XM_014141026.1	MAU2 chromatid cohesion factor homolog	1.04757	0.0857948	1.82503	3.52119e-05	1.61328	0.000533133	1.14491	0.00632199	0.994181	0.0108309
1719	Ssa#XM_014141033.1	Relaxin/insulin-like family peptide receptor 3	1.76298	0.160202	1.87536	0.0390904	1.6721	0.155672	1.47547	0.179503	2.43487	0.0265624
1720	Ssa#XM_014141060.1	Supervillin b	-0.621081	0.117421	-0.734879	0.0199171	-0.866608	0.0131684	-0.580203	0.0784699	-0.781051	0.0361168
1721	Ssa#XM_014141117.1	Protein kinase C, iota	-0.582872	0.0119343	-0.667759	0.00163625	-0.22071	0.369242	-0.621735	0.00378887	-0.884627	0.00148667
1722	Ssa#XM_014141132.1	Insulin receptor a	-0.339557	0.368705	-0.403225	0.0644407	-0.596652	0.021327	-0.612623	0.142897	-0.870121	0.00324695
1723	Ssa#XM_014141163.1	THAP domain-containing protein 7	1.18363	0.012436	1.07587	4.76747e-05	0.866947	0.00324593	0.592611	0.159065	-0.0145323	0.933195
1724	Ssa#XM_014141165.1	interleukin-6	1.13754	0.113638	0.869307	0.247745	0.712524	0.250036	1.19214	0.11294	1.81667	0.00502905
1725	Ssa#XM_014141182.1	Lipoprotein lipase	-0.0827497	0.843458	0.666675	0.19082	1.18801	0.0934266	1.70219	0.0114959	-0.178069	0.660808
1726	Ssa#XM_014141184.1	Kinesin family member 5A, a	-0.150766	0.565662	-0.648219	0.0431989	-0.892075	0.00096086	-0.528348	0.0402463	-0.861786	0.0216926
1727	Ssa#XM_014141189.1	apolipoprotein A-I-like	1.1902	0.0532646	-0.482868	0.241807	-0.892712	0.0132178	-1.09084	0.00614408	-0.674789	0.232156
1728	Ssa#XM_014141190.1	Adaptor-related protein complex 1, sigma 3 subunit, b	-0.704589	0.00302256	-0.788995	0.000166749	-1.13092	0.000105447	-0.725838	0.00507734	-0.282822	0.0728303
1729	Ssa#XM_014141191.1	keratin-associated protein 9-1-like	0.936424	0.0312346	0.450967	0.22302	0.249676	0.473185	-0.528928	0.0407734	-0.42516	0.0769553
1730	Ssa#XM_014141205.1	Kelch-like 24a	1.1338	0.00508747	1.28636	0.00104908	2.02451	1.53739e-06	0.574208	0.178968	0.0306203	0.944324
1731	Ssa#XM_014141206.1	mTERF domain-containing protein 2	-0.0422236	0.942451	0.64791	0.0898988	0.880432	0.042692	0.678046	0.156909	0.708562	0.132567
1732	Ssa#XM_014141216.1	transmembrane protein 14C-like	-0.12229	0.192243	-0.805259	0.000320424	-1.05233	3.95107e-06	-0.612835	0.0163377	0.176377	0.221976
1733	Ssa#XM_014141218.1	Acyl-coenzyme A synthetase ACSM3, mitochondrial	0.217569	0.388974	0.250994	0.245144	0.111621	0.659086	0.937708	0.0140351	1.5347	0.00120693
1734	Ssa#XM_014141220.1	microtubule-associated protein 6 homolog	0.375891	0.46323	0.894003	0.0238256	0.498843	0.14802	1.03371	0.015161	0.682974	0.143793
1735	Ssa#XM_014141246.1	Mitochondrial coenzyme A transporter SLC25A42	-0.242563	0.551226	-0.346388	0.222235	-0.0480143	0.871735	-0.521125	0.202854	-0.923558	0.0257995
1736	Ssa#XM_014141249.1	Transmembrane 6 superfamily member 2	-0.045865	0.852133	-0.781851	0.00547007	-1.05888	0.00172766	-1.04787	0.00722108	-0.189398	0.515627
1737	Ssa#XM_014141260.1	Poly(U)-specific endoribonuclease-C - Ident 65	-0.255329	0.659985	-1.0736	0.0428071	-0.773068	0.167808	-1.74824	0.00939471	-1.79785	0.00650762
1738	Ssa#XM_014141273.1	Non-specific lipid-transfer protein	0.721647	0.29117	1.21153	0.0146337	1.19359	0.0270118	1.04471	0.0657525	1.43398	0.0202629
1739	Ssa#XM_014141276.1	Uridine-cytidine kinase 2a	0.21943	0.393546	0.904667	0.0144624	1.40952	0.00128856	1.31072	0.00197365	1.01836	0.0291356
1740	Ssa#XM_014141278.1	leucine rich repeat containing 42	0.845264	0.0134414	0.584269	0.0241673	1.09167	0.000707774	0.783281	0.0167311	0.678943	0.0298387
1741	Ssa#XM_014141305.1	Protein APCDD1-like	0.386785	0.264869	0.897778	0.00269917	0.768781	0.000987133	0.78995	0.00637318	0.795427	0.00574735
1742	Ssa#XM_014141337.1	KH-type splicing regulatory protein	0.0910763	0.820038	1.10182	0.0017176	0.759338	0.0241369	0.695186	0.0764666	0.559519	0.0987837
1743	Ssa#XM_014141362.1	Vacuolar protein sorting-associated protein 16 homolog	0.568946	0.103778	0.761059	0.0182362	0.826537	0.0240817	0.472699	0.216511	0.407176	0.248639
1744	Ssa#XM_014141406.1	Olfactomedin 3a	-0.458984	0.466076	-1.1269	0.00959688	-1.25036	0.0095442	-1.08437	0.0310504	-1.20137	0.0271546
1745	Ssa#XM_014141413.1	Crystallin J1A	-0.872225	0.00721363	-1.05272	8.40724e-06	-1.28176	0.000531096	-1.42393	0.000131147	-0.733412	0.00777615
1746	Ssa#XM_014141445.1	Myosin, heavy chain b	2.68017	0.0556879	1.13007	0.0342485	0.672487	0.283684	1.07799	0.0956841	-0.332755	0.577613
1747	Ssa#XM_014141492.1	MHC class I antigen	1.86636	0.273349	3.11789	0.0399134	2.03721	0.148208	0.436091	0.721166	3.52244	0.000136372
1748	Ssa#XM_014141497.1	VHSV-induced protein-1	1.12265	0.00689409	0.561474	0.0874438	0.0781942	0.746251	-0.199408	0.511985	-0.18003	0.677741
1749	Ssa#XM_014141548.1	Protein misato homolog 1	0.0576449	0.735839	0.512426	0.0599017	0.483301	0.009153	0.782872	0.00172185	0.995897	0.002185
1750	Ssa#XM_014141551.1	transcription factor B2, mitochondrial	-0.148952	0.304192	0.222248	0.241241	0.383188	0.0175428	0.749715	0.000275788	1.07041	0.00316765
1751	Ssa#XM_014141553.1	Myocyte enhancer factor 2cb	0.816571	0.0165905	0.292734	0.0893867	0.432034	0.0235444	-0.0584452	0.804654	-0.435122	0.0374352
1752	Ssa#XM_014141578.1	Semaphorin 4a - Ident 99	2.48495	0.00113789	2.23272	0.000129236	2.70716	5.16413e-05	1.98566	0.00438252	1.2507	0.04246
1753	Ssa#XM_014141663.1	MTSS1-like protein	-0.381916	0.424935	1.0543	0.0322654	1.43937	0.0283573	0.231954	0.667959	-0.373911	0.471368
1754	Ssa#XM_014141677.1	Saccharopine dehydrogenase b	-0.399803	0.348154	-1.33591	0.00338484	-1.78443	0.000958229	-1.74488	0.002177	-1.72829	0.00403817
1755	Ssa#XM_014141681.1	DEP domain-containing mTOR-interacting protein-like	-0.111266	0.779641	0.459761	0.164152	0.758073	0.0745834	0.929197	0.0358914	0.838954	0.0825421
1756	Ssa#XM_014141693.1	ATPase family AAA domain-containing protein 2	0.509983	0.353011	1.15689	0.00816813	1.20949	0.012863	0.715524	0.137656	0.518224	0.254145
1757	Ssa#XM_014141713.1	proteasome subunit beta type-7-like	-0.132931	0.74488	-1.32383	0.00267834	-1.03753	0.0089512	-0.909514	0.0242931	-1.1512	0.0238401
1758	Ssa#XM_014141714.1	histone H3-like centromeric protein A	-1.01104	0.00042242	-0.746972	0.00484586	0.254433	0.373414	-0.996898	0.0459593	-0.331919	0.239812
1759	Ssa#XM_014141729.1	MHC class I antigen	0.798112	0.186325	1.44552	0.00215467	1.63094	0.00217337	1.58962	0.00577135	1.28524	0.0228352
1760	Ssa#XM_014141731.1	Retinoid X recpetor	0.351102	0.239871	0.717835	0.0182612	0.80089	0.0284156	0.812788	0.0404077	0.565669	0.116914
1761	Ssa#XM_014141738.1	Bromodomain-containing 2a	-0.379609	0.321849	-0.457274	0.101885	-0.554401	0.0882433	-0.660966	0.0876487	-0.883691	0.0249606
1762	Ssa#XM_014141748.1	Proteasome subunit beta type-9-A like	0.50093	0.251157	0.631349	0.0859682	0.94316	0.0265698	0.337855	0.179368	0.570787	0.036218
1763	Ssa#XM_014141756.1	Kinesin-like protein KIFC1	-0.671723	0.00376057	-0.207347	0.438798	0.829866	0.00857301	-0.530219	0.207159	0.162094	0.589576
1764	Ssa#XM_014141771.1	Sodium/potassium-transporting ATPase subunit alpha-2	0.275651	0.26678	0.807348	0.000157156	0.735121	0.00408717	0.754761	0.00174204	1.02987	8.60194e-05
1765	Ssa#XM_014141795.1	C-type lectin domain family 5 member A-like	1.00423	0.000465219	1.38113	1.05677e-05	1.86533	3.44322e-05	1.49322	4.86839e-05	0.673044	0.00718135
1766	Ssa#XM_014141817.1	Intermediate filament family orphan 1	-0.464727	0.106345	0.275099	0.417553	0.894497	0.0267968	-0.590484	0.069405	-0.839347	0.0162364
1767	Ssa#XM_014141828.1	Polyhomeotic Ph1 homolog - Ident 78	-0.649779	0.132854	-1.58304	2.66899e-05	-1.57609	2.57379e-05	-2.0609	2.34396e-05	-1.58335	0.000547724
1768	Ssa#XM_014141871.1	Ring finger protein 19B	0.950723	0.0716852	1.46075	5.93505e-05	0.92824	0.000219333	1.14141	0.000137747	1.25904	7.70897e-06
1769	Ssa#XM_014141874.1	Adenylate kinase 2, mitochondrial	0.36793	0.14644	0.765668	0.00381897	0.688899	0.0206252	1.10831	0.00628876	0.756451	0.0256162
1770	Ssa#XM_014141876.1	NADH dehydrogenase [ubiquinone] iron-sulfur protein 5-like	0.280836	0.44204	0.510234	0.107052	0.533464	0.132713	0.878966	0.0437511	1.01007	0.0248606
1771	Ssa#XM_014141923.1	Eukaryotic translation elongation factor 1 alpha 1, like 1	-0.498062	0.0276562	0.784159	0.00144632	1.17608	0.00122589	-0.555887	0.0446112	-0.155248	0.521357
1772	Ssa#XM_014141935.1	Palmitoyl-protein thioesterase 1	-0.237469	0.431324	0.437931	0.0160175	0.809577	0.000730469	0.598842	0.0390196	0.279745	0.170617
1773	Ssa#XM_014142013.1	sperm acrosome membrane-associated protein 4-like	0.897981	0.0902982	0.845644	0.0191113	0.981671	0.0107452	0.615833	0.0540252	0.227298	0.375487
1774	Ssa#XM_014142014.1	Chloride intracellular channel 1 - Ident 94	0.0566451	0.909739	0.709741	0.0208248	0.760112	0.0211292	0.811508	0.046823	0.860018	0.0221587
1775	Ssa#XM_014142017.1	NG,NG-dimethylarginine dimethylaminohydrolase 2	-0.354104	0.338523	-0.943504	3.42966e-07	-0.939701	5.93122e-05	-0.917944	2.03094e-05	-0.926274	1.45722e-05
1776	Ssa#XM_014142028.1	Lipin 1	0.061196	0.777985	1.52081	0.0082213	2.7317	9.95189e-06	2.9125	0.000332185	0.710872	0.0260096
1777	Ssa#XM_014142037.1	Dolichyl-diphosphooligosaccharide--protein glycosyltransferase subunit STT3B	-0.416677	0.0529641	-0.800685	0.00132152	-1.01632	5.59427e-05	-1.19223	0.00263375	-0.735002	0.00304583
1778	Ssa#XM_014142063.1	Ceramide synthase 2a	-0.819466	0.203187	-1.04143	0.00010493	-1.15595	0.000788251	-0.633809	0.0362435	-1.22298	0.00814871
1779	Ssa#XM_014142100.1	myomegalin-like	-0.763897	0.107925	-1.12823	9.8494e-05	-1.17808	0.000125656	-1.21589	0.000587521	-1.2675	0.000508037
1780	Ssa#XM_014142151.1	histone-lysine N-methyltransferase 2B-like	0.561445	0.0412561	0.695052	0.00258529	0.821166	0.00105961	0.624834	0.0170507	0.346945	0.104838
1781	Ssa#XM_014142179.1	Protein PRRC2B	-0.560577	0.124738	-0.337731	0.181534	-0.224034	0.344543	-0.445919	0.184504	-0.863605	0.0129942
1782	Ssa#XM_014142217.1	aquaporin-10-like	0.975533	0.0888972	1.56759	4.07752e-06	1.10443	0.00822346	0.501546	0.196831	0.115669	0.51181
1783	Ssa#XM_014142221.1	Krev interaction trapped protein 1	0.198453	0.595752	0.87353	0.000130199	0.923831	0.00020548	0.855381	0.00216675	0.856025	0.00110833
1784	Ssa#XM_014142224.1	DNL-type zinc finger	-0.896361	0.00025008	-0.857099	4.9346e-05	-0.864599	8.15219e-05	-0.523066	0.0039305	-0.388074	0.03289
1785	Ssa#XM_014142229.1	Protein Jumonji	0.358525	0.259376	0.837765	0.0142061	0.633685	0.0420425	0.065798	0.820381	0.10464	0.722244
1786	Ssa#XM_014142237.1	Apolipoprotein A-II	-0.250966	0.382074	-0.825193	3.12365e-06	-0.975735	0.000213051	-0.865316	0.000615738	-0.876229	0.000955488
1787	Ssa#XM_014142258.1	SH2 domain-containing protein 2A	-0.337554	0.0365604	-0.649323	0.000324951	-0.612658	0.00257143	-0.759568	0.000847383	-0.800572	0.000777172
1788	Ssa#XM_014142278.1	Thioredoxin-interacting protein	2.0003	0.000284127	2.66763	1.72956e-05	2.96641	5.15493e-05	3.75615	4.60628e-06	2.07169	0.0207865
1789	Ssa#XM_014142280.1	Metaxin-1	-0.580036	0.0172058	-0.652172	0.00195395	-1.32942	3.35522e-05	-0.355861	0.0676772	0.150134	0.417239
1790	Ssa#XM_014142295.1	Lanosterol 14-alpha demethylase	-2.10217	2.54469e-05	-1.22065	0.0148875	-2.61029	4.17242e-05	-1.49375	0.00370487	-0.844052	0.124327
1791	Ssa#XM_014142298.1	alpha-N-acetylgalactosaminide alpha-2,6-sialyltransferase 1-like	0.62315	0.157072	-0.928658	0.00851394	-1.17228	0.00287478	-1.24624	0.00423495	-1.32981	0.00387559
1792	Ssa#XM_014142309.1	CMP-N-acetylneuraminate-beta-galactosamide-alpha-2, 3-sialyltransferase 1-like	1.21423	0.0010245	0.344653	0.308658	0.717818	0.0490848	-0.731915	0.0512907	-0.978715	0.0117535
1793	Ssa#XM_014142324.1	heat shock factor-binding protein 1-like	-0.319132	0.187618	-1.41983	2.27627e-06	-1.5643	1.80985e-05	-0.913205	0.0096534	-0.443106	0.0251343
1794	Ssa#XM_014142329.1	nuclear transport factor 2-like	-0.0878551	0.797681	0.0189593	0.932362	0.0454155	0.859979	0.466358	0.159261	0.864049	0.0207525
1795	Ssa#XM_014142352.1	AT-rich interactive domain-containing protein 1B	0.349573	0.497347	0.841859	0.00299435	0.71649	0.0349373	0.789733	0.0519234	0.495074	0.0975035
1796	Ssa#XM_014142356.1	formin-like protein 5	-0.655276	0.0591419	-1.36944	0.000251759	-1.4092	7.21038e-05	-1.60716	0.00328552	-1.48573	3.52693e-05
1797	Ssa#XM_014142377.1	Receptor-type tyrosine-protein phosphatase U	1.73264	0.00408687	0.541527	0.0387077	0.221647	0.443435	1.37538	0.00281436	0.853499	0.0206847
1798	Ssa#XM_014142434.1	Ubiquitin-conjugating enzyme E2 E3	0.518101	0.249664	0.792041	0.0497039	0.982768	0.00913611	-0.356759	0.347597	-0.275005	0.504235
1799	Ssa#XM_014142435.1	60S ribosomal protein L15	0.697685	0.259634	1.49169	0.000972138	1.64712	0.00115775	1.46211	0.00704261	1.42472	0.00682045
1800	Ssa#XM_014142444.1	succinate dehydrogenase assembly factor 3, mitochondrial-like	0.415484	0.447823	1.11525	0.00366022	1.09334	0.0102869	1.17844	0.0161045	1.62908	0.00236374
1801	Ssa#XM_014142473.1	Leucine-rich repeat-containing protein 3B	0.194446	0.5255	-0.295617	0.0627949	-0.668997	0.00490002	-0.909212	0.000430002	-1.06427	0.000299701
1802	Ssa#XM_014142477.1	3-oxoacyl-ACP synthase, mitochondrial	0.0674465	0.805752	0.531684	0.0112235	0.0520845	0.863279	1.08275	0.00421696	1.06187	0.000608214
1803	Ssa#XM_014142517.1	ATP-binding cassette sub-family F member 1	0.354239	0.429338	0.466461	0.218003	0.471862	0.265921	1.00158	0.0727609	1.2364	0.0285491
1804	Ssa#XM_014142538.1	Tubulin, beta 4B class IVb	-0.972749	0.0157926	-0.414652	0.125256	-0.922188	0.0065526	-0.4737	0.260104	0.23218	0.343009
1805	Ssa#XM_014142559.1	uncharacterized LOC106570350	0.946864	0.0903376	0.975321	0.0225955	0.863414	0.0540298	1.14993	0.0553947	1.50596	0.0165705
1806	Ssa#XM_014142585.1	Zinc finger protein 40	1.08485	0.00119162	0.129584	0.522316	0.627387	0.0146668	0.0367055	0.87652	-0.176963	0.495111
1807	Ssa#XM_014142592.1	Small integral membrane protein 13	0.678178	0.387668	1.68823	0.00123149	1.57289	0.00492254	1.1338	0.0537939	0.78254	0.130757
1808	Ssa#XM_014142595.1	glutathione S-transferase A-like	0.767213	0.0312934	0.936781	0.000520831	0.985052	0.00168542	0.440438	0.0818139	0.522275	0.0488927
1809	Ssa#XM_014142654.1	60S ribosomal protein L35	0.516229	0.120071	0.849726	0.00636052	0.867105	0.01635	0.825625	0.0435807	1.08568	0.00786506
1810	Ssa#XM_014142655.1	Endothelin-1	0.0967486	0.161797	0.200467	0.015925	0.656775	0.000939716	0.824817	0.00838903	0.196311	0.115031
1811	Ssa#XM_014142716.1	NDRG family member 3, isoform CRA_c; Protein NDRG3	-0.200868	0.291582	0.80887	0.00699942	1.21929	0.000261531	1.23882	0.000307106	0.216732	0.454168
1812	Ssa#XM_014142718.1	Receptor-type tyrosine-protein phosphatase S	-0.694097	0.159289	-0.890443	0.0426768	-0.714237	0.130022	-0.706093	0.205887	-0.669595	0.204282
1813	Ssa#XM_014142727.1	otolith matrix macromolecule-64	-0.554313	0.159397	-1.02206	0.000617247	-1.06381	0.000875285	-0.512574	0.309792	0.0318972	0.942578
1814	Ssa#XM_014142743.1	Heat shock factor protein 4	0.983824	0.0517921	0.220411	0.637413	1.03764	0.00875699	1.14488	0.0112888	-0.71805	0.0635897
1815	Ssa#XM_014142764.1	FAM133	0.326492	0.386341	0.806388	0.0223058	0.687412	0.0892449	0.610715	0.135218	0.766831	0.0624658
1816	Ssa#XM_014142877.1	Nuclear pore complex protein Nup153	-1.24577	0.00141449	-2.1564	2.21198e-06	-2.17175	5.05267e-05	-2.2087	0.000130766	-1.78494	7.07855e-06
1817	Ssa#XM_014142878.1	stromelysin-3-like	0.568824	0.35104	0.0548376	0.913457	-0.0792106	0.87475	-0.275632	0.692417	0.946638	0.0462949
1818	Ssa#XM_014142886.1	Glutamate receptor, ionotropic, N-methyl D-aspartate-associated protein 1	-0.401573	0.279095	-0.663668	0.00219417	-0.737934	0.00469948	-0.522124	0.0490495	-0.886039	0.00467035
1819	Ssa#XM_014142903.1	D-dopachrome decarboxylase-A-like	-0.593214	0.00206366	-0.803359	0.000266607	-1.07986	0.000104664	-1.21155	0.000528346	-0.767787	0.00173069
1820	Ssa#XM_014142904.1	Tubulointerstitial nephritis antigen-like	-0.231793	0.332817	-0.711333	0.000154359	-0.800287	0.000116701	-0.639217	0.000599097	-0.597074	0.00187259
1821	Ssa#XM_014142909.1	histone acetyltransferase KAT2B-like	0.757789	0.0189358	0.653185	0.00587147	0.910581	0.00150941	0.259505	0.304842	0.0257549	0.905152
1822	Ssa#XM_014142914.1	Outer dense fiber protein 2	1.57285	0.122078	3.12977	2.47865e-05	2.75767	0.000700485	1.77033	0.0190442	1.08998	0.0587653
1823	Ssa#XM_014142917.1	potassium voltage-gated channel subfamily H member 8-like	-0.90534	0.0713195	-1.25747	0.000374698	-1.43935	0.000244455	-1.30349	0.00142795	-1.36445	0.00045161
1824	Ssa#XM_014142974.1	Inactive phospholipase C-like protein 1	1.05587	0.0878685	1.48037	0.000148693	0.782323	0.0741094	-0.0647387	0.899522	0.0393096	0.868323
1825	Ssa#XM_014142999.1	E3 ubiquitin-protein ligase MYLIP	0.602681	0.0919253	0.591883	0.0148503	1.071	0.000963243	0.272461	0.257022	0.0994889	0.654088
1826	Ssa#XM_014143003.1	Stathmin 1a	1.04397	0.09885	2.00723	2.23078e-05	2.00121	4.22182e-05	1.65239	0.000225105	1.66242	0.000273945
1827	Ssa#XM_014143004.1	Y+L amino acid transporter 2	0.845822	0.00129272	0.888202	0.000630099	0.952871	0.000731363	0.512465	0.00454041	0.313651	0.0389494
1828	Ssa#XM_014143005.1	Protein FAM65B	-0.680459	0.198704	1.44447	0.0675162	1.45833	0.0478388	2.56464	0.00180286	0.837086	0.236068
1829	Ssa#XM_014143019.1	WD repeat-containing protein 34	0.0588358	0.880249	0.381682	0.205846	0.600001	0.0792744	1.10397	0.0173883	0.752525	0.0595572
1830	Ssa#XM_014143020.1	myelin P2 protein-like	-0.488129	0.162308	-0.655171	0.00417042	-0.564493	0.0231332	-1.13827	0.0124813	-0.51404	0.0687905
1831	Ssa#XM_014143031.1	interleukin-6	-0.533184	0.153587	-0.956974	1.17033e-09	-1.28032	2.53336e-05	-1.10592	1.0573e-06	-1.14435	1.77573e-08
1832	Ssa#XM_014143046.1	extensin-like	-0.240768	0.631365	-1.04676	0.000519588	-1.05951	0.00113392	-0.837016	0.0306445	-1.12267	0.00393211
1833	Ssa#XM_014143068.1	E3 ubiquitin-protein ligase ZNRF2-like	0.279914	0.215114	0.525688	0.00584446	0.935361	0.00331082	0.938507	0.00351399	0.94522	0.00155833
1834	Ssa#XM_014143085.1	receptor-transporting protein 3-like	0.62238	0.0974516	-1.02541	0.0112706	-0.571177	0.120505	-1.28127	0.00530536	-1.29318	0.00416234
1835	Ssa#XM_014143108.1	AT-hook DNA-binding motif-containing protein 1-like	-0.60299	0.137481	-0.844452	0.111914	-1.0421	0.0255756	-1.24893	0.073991	-0.669993	0.0971416
1836	Ssa#XM_014143114.1	Erythrocyte membrane protein band 4.1b	0.409823	0.195034	0.756656	0.0157009	0.760737	0.107057	0.508013	0.119243	0.934561	0.00203829
1837	Ssa#XM_014143118.1	60S ribosomal protein L14-like	0.495641	0.23486	1.07916	3.05601e-05	1.09306	3.35794e-05	0.99956	0.000289746	1.09321	0.000143573
1838	Ssa#XM_014143135.1	extensin-like	-1.39463	0.0738081	-2.65815	3.77185e-07	-2.60379	3.29375e-05	-2.68381	6.66735e-06	-2.78273	8.45175e-05
1839	Ssa#XM_014143155.1	glutenin, high molecular weight subunit DY10-like	0.962289	0.156873	1.58363	2.92819e-07	1.24671	0.000138239	0.698524	0.00675597	0.242324	0.00754602
1840	Ssa#XM_014143177.1	Homeobox-containing protein 1	-0.483735	0.0396139	-0.98085	0.00102021	-1.56739	0.000400548	-1.09492	0.00512451	-0.899137	0.0114152
1841	Ssa#XM_014143189.1	Solute carrier family 6	0.927334	0.0224636	1.33829	1.74132e-05	1.65018	8.40221e-06	1.00242	0.009065	1.12222	0.00054229
1842	Ssa#XM_014143200.1	Zinc finger and BTB domain-containing protein 8B	-0.462855	0.0872197	-0.75674	0.00183217	-0.851161	0.00127934	-0.401321	0.145465	-0.591829	0.0113474
1843	Ssa#XM_014143212.1	Major facilitator superfamily domain containing 2aa	1.1884	0.0671735	-0.540524	0.328783	-0.713301	0.193666	-0.576344	0.444573	-1.86026	0.0167975
1844	Ssa#XM_014143223.1	Small integral membrane protein 12	-0.155192	0.569239	0.0303211	0.878263	-0.174543	0.387332	0.611508	0.00685894	0.889345	0.000723244
1845	Ssa#XM_014143226.1	CUB and sushi domain-containing protein 2	0.555149	0.0536956	0.978078	1.35883e-06	0.924251	5.43627e-05	0.770844	0.000125919	0.750023	0.00028623
1846	Ssa#XM_014143274.1	triple QxxK/R motif containing	-0.371551	0.414953	-0.646055	0.15216	-0.779534	0.0634491	-0.611738	0.18654	-1.13751	0.0352513
1847	Ssa#XM_014143341.1	Sushi domain-containing protein 2	0.17024	0.563184	-0.178358	0.381276	-0.0033138	0.986883	-0.774113	0.0258757	-0.971108	0.00850241
1848	Ssa#XM_014143342.1	frataxin, mitochondrial-like	-0.954018	0.00924231	-0.43458	0.025264	-0.581366	0.00718412	-0.853264	0.00155439	-0.663828	0.00509109
1849	Ssa#XM_014143354.1	H2A histone family, member Vb	0.682843	0.203716	1.29719	2.0599e-05	1.36789	4.49043e-05	1.26251	0.000431387	1.15861	0.000340113
1850	Ssa#XM_014143360.1	interleukin-1 beta-like	-0.662614	0.449292	-1.28568	0.0190934	-1.18127	0.0615004	-1.56471	0.0250776	-1.49697	0.0313855
1851	Ssa#XM_014143377.1	3-hydroxy-3-methylglutaryl-Coenzyme A reductase a	-1.8409	1.68779e-06	-1.30205	0.000378819	-1.79362	2.9978e-05	-1.72049	0.000723241	-0.466924	0.0510835
1852	Ssa#XM_014143391.1	titin-like	1.1997	0.0597857	0.094873	0.779224	0.495517	0.174641	-0.131153	0.699402	-1.1855	0.001889
1853	Ssa#XM_014143394.1	Ephrin-A4	-1.00264	0.0844308	-1.77839	0.000147036	-1.73286	0.000599548	-1.50655	0.00195887	-1.68056	0.000467359
1854	Ssa#XM_014143414.1	N-acetylated-alpha-linked acidic dipeptidase-like protein	0.140218	0.848384	0.122541	0.864199	0.319404	0.666326	3.07987	0.000354156	0.426402	0.687814
1855	Ssa#XM_014143423.1	Probable phospholipid-transporting ATPase IM	0.789274	0.0727217	1.13265	2.36011e-05	1.31415	2.12497e-05	1.06246	0.000277935	1.05695	0.000189843
1856	Ssa#XM_014143441.1	sonic hedgehog protein-like	0.622294	0.163492	-0.304554	0.383597	-1.04366	0.0218506	-1.20968	0.0364803	-1.07681	0.0464219
1857	Ssa#XM_014143483.1	RasGEF domain family, member 1Ba	0.920607	0.00429487	0.477849	0.00522636	1.03287	0.00316164	0.236534	0.278573	-0.0610056	0.678232
1858	Ssa#XM_014143492.1	Potassium channel modulatory factor 1	-1.28344	0.000118027	-1.26877	3.70681e-06	-1.31425	3.39776e-05	-1.20974	7.62522e-05	-1.45862	1.10229e-05
1859	Ssa#XM_014143507.1	Probable arylformamidase - Ident 26	0.534388	0.454231	-1.5751	0.0417177	-2.64992	0.00331144	0.963561	0.248431	2.88048	0.00408606
1860	Ssa#XM_014143521.1	E3 ubiquitin-protein ligase DTX3L	-0.1421	0.798913	-0.82356	0.000577705	-1.0166	0.000344231	-1.41035	0.000131472	-1.34454	7.91506e-05
1861	Ssa#XM_014143547.1	Proteasome	-0.129781	0.833533	1.00055	0.0216655	1.06003	0.027437	0.550163	0.256624	0.731074	0.141694
1862	Ssa#XM_014143552.1	Serine/threonine-protein kinase Nek6	0.325244	0.596809	1.03729	0.0287033	0.836627	0.0843334	0.837588	0.126553	0.943743	0.0820175
1863	Ssa#XM_014143555.1	Protein RUFY3	0.294115	0.291495	0.672129	0.0149171	1.08012	0.00194975	0.57221	0.123496	0.28105	0.305611
1864	Ssa#XM_014143568.1	Phosphoserine aminotransferase	-0.399281	0.185696	-0.78047	0.0189128	-0.726017	0.0831754	1.13971	0.0266446	2.10995	0.00029023
1865	Ssa#XM_014143590.1	Fish virus induced TRIM-7	0.921396	0.064408	1.03987	0.00299575	1.063	0.00225011	0.80606	0.0439339	0.793611	0.0227117
1866	Ssa#XM_014143669.1	keratin-associated protein 9-8-like	1.28972	0.0420213	1.81839	7.41056e-05	1.72074	0.0005846	1.23025	0.0192978	1.45116	0.00134499
1867	Ssa#XM_014143699.1	prepronociceptin-like	0.0268589	0.952301	0.509784	0.285109	0.921571	0.101804	1.34911	0.0353857	0.736825	0.299106
1868	Ssa#XM_014143709.1	gastrula zinc finger protein XlCGF26.1-like	0.632508	0.0602015	0.787566	0.00249039	0.814465	0.00162864	0.731233	0.00840409	0.875811	0.0037997
1869	Ssa#XM_014143710.1	DeltaC	-0.473967	0.326059	-0.856019	0.0287909	-0.659191	0.101177	-0.0898782	0.822822	-0.158244	0.744657
1870	Ssa#XM_014143758.1	Serine/arginine-rich splicing factor 6a	0.130727	0.756278	0.947839	0.00307352	1.14626	0.00189464	0.385664	0.273142	0.637135	0.0835878
1871	Ssa#XM_014143782.1	Poly	0.193559	0.790919	0.743679	0.0191831	1.01688	0.00596609	1.02702	0.013637	1.01914	0.0171254
1872	Ssa#XM_014143789.1	Cytochrome P450, family 46, subfamily A, polypeptide 2	0.458454	0.0701236	0.752161	0.00272322	0.819367	0.00364112	0.687989	0.0326	0.0620336	0.806264
1873	Ssa#XM_014143797.1	Cyclin K	-1.14198	0.00818165	-0.9605	0.00953319	-1.55959	7.65502e-05	-0.719966	0.0973142	-0.223371	0.474559
1874	Ssa#XM_014143800.1	zinc finger protein 665-like	0.933791	0.0113935	1.11526	0.000184797	1.13845	0.000388892	0.983706	0.00373598	0.880301	0.0120295
1875	Ssa#XM_014143807.1	Eukaryotic translation initiation factor 5	-0.29196	0.336551	-0.0510782	0.861299	0.565881	0.0804171	0.818088	0.0835013	1.07677	0.0319161
1876	Ssa#XM_014143816.1	MAP/microtubule affinity-regulating kinase 3	-0.521674	0.0803388	-0.642028	0.00656702	-0.691879	0.00704106	-0.87437	0.00590662	-1.14141	0.00113807
1877	Ssa#XM_014143848.1	C1q and TNF domain	-0.151539	0.0500617	-0.533711	6.77326e-05	-0.837911	1.40893e-05	-0.866553	0.00239939	-0.0600148	0.519782
1878	Ssa#XM_014143850.1	complement C1q-like protein 2	-0.656282	0.0224301	-1.36691	0.000318605	-2.04704	1.51627e-07	-1.54005	2.4258e-05	-0.476712	0.000538713
1879	Ssa#XM_014143863.1	trichohyalin-like	0.938275	0.124664	1.53435	1.52567e-06	1.30452	0.00159308	0.495112	0.050386	0.149291	0.259015
1880	Ssa#XM_014143884.1	complement C1q-like protein 2 (LOC106571137)	-0.466835	0.129799	-0.830512	0.0275156	-1.75964	1.04219e-05	-0.894925	0.0320885	0.705631	0.00735606
1881	Ssa#XM_014143911.1	Protein PRRC1	-0.320747	0.0809058	-0.734016	0.00396296	-1.11136	0.00012903	-0.451438	0.0753596	-0.0808875	0.686797
1882	Ssa#XM_014143921.1	Sine oculis binding protein homolog	0.042712	0.946168	-0.289458	0.222502	-0.384343	0.194149	-0.419442	0.34605	-1.04106	0.00363424
1883	Ssa#XM_014143929.1	PQ-loop repeat-containing protein 3-like	0.0788142	0.643643	-1.8405	3.6284e-06	-1.7581	9.37382e-06	-1.63599	1.05209e-05	-1.35526	0.0154729
1884	Ssa#XM_014143933.1	Protein disulfide-isomerase A6	1.21319	0.00788357	1.79935	6.21542e-05	1.88332	0.000928818	1.50438	0.000994194	1.77217	0.00201747
1885	Ssa#XM_014143940.1	Pumilio homolog 1	0.433247	0.418942	1.35259	0.000836677	1.54708	0.000631708	1.1431	0.00602837	0.749942	0.0484216
1886	Ssa#XM_014143960.1	tetratricopeptide repeat domain 32	-0.37561	0.17046	-0.876543	0.000778455	-0.613114	0.0308165	-0.255663	0.323315	-0.307267	0.202233
1887	Ssa#XM_014143961.1	Potassium voltage-gated channel subfamily S member	0.309518	0.39999	0.647399	0.0245266	0.527691	0.132	1.48382	0.00235815	0.579548	0.0795989
1888	Ssa#XM_014143980.1	Retinal degeneration 3	-0.0184924	0.873041	0.13672	0.355106	0.70697	0.0341837	1.25909	0.00203575	1.88491	0.0026963
1889	Ssa#XM_014143986.1	Serine/threonine-protein phosphatase 2A 56 kDa regulatory subunit alpha isoform	-1.15778	0.00484444	-0.794708	0.0069511	-0.697751	0.00124257	-0.878549	0.000287648	-0.778195	0.00110502
1890	Ssa#XM_014143988.1	CMRF35-like molecule 8	0.10508	0.600431	0.017307	0.917394	0.245262	0.195605	2.54958	0.000620768	2.46657	0.000103285
1891	Ssa#XM_014144031.1	SRY-box containing gene 11b	0.818375	0.0195721	0.347079	0.0146596	0.0305406	0.740179	0.175986	0.138979	0.145287	0.194516
1892	Ssa#XM_014144033.1	Hepatocyte nuclear factor 3-beta	0.0392537	0.862472	0.485716	0.0366256	0.881317	0.00247405	0.474322	0.113555	-0.15764	0.427109
1893	Ssa#XM_014144042.1	Interactor protein for cytohesin exchange factors	0.738116	0.0657896	0.274717	0.444588	0.908043	0.0234539	0.453637	0.237236	0.0356369	0.926488
1894	Ssa#XM_014144069.1	ArfGAP with SH3 domain, ankyrin repeat and PH domain 2a	-0.306438	0.0275482	-0.424141	0.00159045	-0.438842	0.0054078	-1.07621	1.22425e-05	-0.770964	0.000250374
1895	Ssa#XM_014144100.1	GC-rich promoter binding protein 1	-0.955739	0.00314521	-0.323049	0.175523	-0.616006	0.0327468	-0.214855	0.463927	-0.318685	0.240651
1896	Ssa#XM_014144140.1	Serine/threonine-protein kinase PLK2	0.282475	0.415622	-0.302135	0.211704	0.0797668	0.747261	-0.330315	0.302424	-0.80745	0.0120291
1897	Ssa#XM_014144205.1	mucin-5AC-like	0.0442812	0.925977	-0.566047	0.102761	-0.640007	0.103562	-0.674045	0.132137	-1.21162	0.0483951
1898	Ssa#XM_014144212.1	Nucleoporin Nup43	-0.901081	0.000237253	-0.644198	0.000539493	-0.863017	0.000398245	-0.354185	0.0843695	-0.118467	0.42164
1899	Ssa#XM_014144239.1	Solute carrier family 16, member 10	-0.481965	0.126111	0.888088	0.0120437	1.12886	0.00952283	1.31327	0.00463881	0.669186	0.0706605
1900	Ssa#XM_014144254.1	Laminin subunit alpha-4	0.733899	0.0331857	0.89087	0.00256528	0.986354	0.0118914	0.637417	0.110141	0.0418974	0.869418
1901	Ssa#XM_014144262.1	collagen, type X, alpha 1 precursor	1.02367	0.131128	0.937997	0.00721405	0.407361	0.0159591	0.424487	0.0510521	0.149066	0.166394
1902	Ssa#XM_014144325.1	protein LEG1 homolog	-0.634611	0.0184921	-1.34714	0.000653996	-1.55379	0.00035531	-0.783042	0.0123807	-0.232406	0.392437
1903	Ssa#XM_014144391.1	Gap junction protein	-0.0166372	0.941257	0.983069	0.0027046	1.60308	0.000879566	1.17528	0.0117324	0.684634	0.0220332
1904	Ssa#XM_014144392.1	Mannosidase, alpha, class 1A, member 1	-1.47728	0.0628032	-2.52152	5.10443e-06	-2.79174	1.99079e-05	-2.38481	0.00017672	-2.59255	4.81195e-05
1905	Ssa#XM_014144417.1	Afadin	0.773902	0.0447172	0.825703	0.017439	0.555743	0.113661	0.38482	0.324945	0.258658	0.477987
1906	Ssa#XM_014144436.1	Plasminogen	0.707226	0.41249	1.17597	0.028175	1.35156	0.022641	1.26467	0.0488883	1.10422	0.0755848
1907	Ssa#XM_014144437.1	Cation-independent mannose-6-phosphate receptor	0.380622	0.223714	-0.180023	0.525977	-0.568718	0.076608	-0.545138	0.136274	-0.803437	0.0320671
1908	Ssa#XM_014144452.1	Dihydroxyacetone phosphate acyltransferase	-0.764859	0.0130801	-0.601149	0.0195927	-0.924963	0.00204049	-0.202469	0.428296	0.391619	0.136964
1909	Ssa#XM_014144468.1	Cbp/p300-interacting transactivator 2	0.377815	0.111182	0.645434	0.0108117	1.10018	0.000126283	0.576176	0.0705868	0.270631	0.415728
1910	Ssa#XM_014144508.1	Kinetochore-associated protein NSL1 homolog	-0.806285	0.000879166	-0.517918	0.0129613	-0.216835	0.495515	-0.533344	0.193597	0.0634248	0.785307
1911	Ssa#XM_014144527.1	AarF domain containing kinase 4	0.897933	0.129085	0.856818	0.0502261	1.06034	0.0327984	-0.104284	0.874231	0.634397	0.172444
1912	Ssa#XM_014144546.1	Tripartite motif-containing protein 54	0.484013	0.119129	0.915357	0.00082004	0.810935	0.0130005	1.02092	0.00349694	0.662674	0.00598463
1913	Ssa#XM_014144599.1	meprin A subunit alpha-like	-1.21177	0.0591987	-2.35458	0.000111818	-2.59948	0.000443019	-2.24304	0.00163997	-2.17964	0.0016929
1914	Ssa#XM_014144610.1	toll-like leucine-rich repeat [Salmo salar] Toll-like receptor 5	0.104052	0.691122	-0.466101	0.0549332	-1.51354	0.000548092	-1.10295	0.00248218	-0.327608	0.299668
1915	Ssa#XM_014144643.1	Putative sodium-coupled neutral amino acid transporter 9	0.565501	0.337658	0.776758	0.00767551	1.09118	0.000287224	0.289739	0.344191	-0.329312	0.155238
1916	Ssa#XM_014144646.1	39S ribosomal protein S18a, mitochondrial	-0.629566	0.00249038	-0.417705	0.00583499	-0.824275	0.000513536	-0.235515	0.141059	0.081534	0.636764
1917	Ssa#XM_014144659.1	E3 ubiquitin-protein ligase rnf146; AltName: Full=RING finger protein 146	0.332727	0.505829	0.756005	0.0299748	1.07731	0.00963255	0.702452	0.096029	0.871195	0.0406686
1918	Ssa#XM_014144666.1	Ankyrin repeat domain-containing protein 55	0.566122	0.16441	1.13659	5.60355e-05	0.988311	0.000386174	0.584328	0.0155937	0.638137	0.0122288
1919	Ssa#XM_014144668.1	Nuclear receptor coactivator 7	-0.088542	0.786636	-0.1097	0.700962	-0.292761	0.313525	-0.999817	0.015446	-0.126203	0.732645
1920	Ssa#XM_014144672.1	Trans-L-3-hydroxyproline dehydratase	0.459626	0.289074	1.26237	0.0011856	1.3113	0.00117103	1.49416	0.00208157	1.15464	0.0144498
1921	Ssa#XM_014144674.1	Potassium channel subfamily K member 1	0.995677	0.211864	1.19771	2.31509e-05	1.38386	3.43656e-05	1.02489	0.00292549	1.0552	0.00121945
1922	Ssa#XM_014144703.1	Hydroxymethylglutaryl-CoA synthase, cytoplasmic	-2.15685	0.0319101	-0.513174	0.433409	-2.26865	0.000143848	-1.1647	0.0303944	-0.0900904	0.849966
1923	Ssa#XM_014144711.1	Ubiquitin protein ligase E3 component n-recognin 7	-0.324366	0.0333015	0.116867	0.378804	0.0748767	0.334764	0.367574	0.0841783	0.819475	6.90755e-05
1924	Ssa#XM_014144758.1	Alpha-tropomyosin	0.369297	0.649307	-0.358988	0.221632	-0.572703	0.0916595	-0.659116	0.122731	-0.939966	0.0211822
1925	Ssa#XM_014144766.1	Echinoderm microtubule associated protein like 2 - Ident 62	-0.811939	0.193706	-2.67452	1.29453e-05	-2.55408	2.01719e-05	-1.92239	0.00062293	-2.22033	0.000746194
1926	Ssa#XM_014144802.1	N-acetyltransferase 12, isoform CRA_a; N-alpha-ace	-1.05248	0.00162794	-0.366508	0.139887	-0.751174	0.00177519	-0.595988	0.0232986	-0.815814	0.00758626
1927	Ssa#XM_014144809.1	ADP-ribosylation factor 6	-0.76743	0.00395303	-0.980618	0.000628685	-1.57296	8.10422e-05	-0.765278	0.0230097	-0.462079	0.0102452
1928	Ssa#XM_014144845.1	tripartite motif-containing protein 35-like	-1.26288	0.0592004	-0.828351	0.000187498	-1.26231	7.49917e-06	-0.879695	0.00049309	-0.787217	0.000229364
1929	Ssa#XM_014144961.1	Zinc finger protein 36, C3H1 type-like 2	0.299594	0.465893	0.993016	0.00082626	1.24101	0.000864423	0.785781	0.0503228	0.23293	0.377618
1930	Ssa#XM_014145009.1	V-type proton ATPase subunit D	0.00788192	0.974924	0.450623	0.0159226	0.808918	0.000859673	0.664955	0.00102631	0.431731	0.0365344
1931	Ssa#XM_014145037.1	SERTA domain containing 2 - Ident 36	-0.715409	0.266799	0.03327	0.866145	-0.304679	0.164446	-0.887617	0.00543847	-0.62995	0.0399614
1932	Ssa#XM_014145084.1	Kinesin light chain 1	-0.540991	0.265649	-0.885019	0.00250314	-1.02404	0.00153972	-1.13978	0.00116328	-1.05511	0.0017059
1933	Ssa#XM_014145128.1	alpha-(1,3)-fucosyltransferase 9-like (LOC106571726)	0.0709903	0.834365	0.950225	0.0300701	0.898106	0.11171	1.47625	0.0130122	1.50108	0.0084601
1934	Ssa#XM_014145147.1	Glycerophosphocholine phosphodiesterase GPCPD1	0.546563	0.00960775	0.615842	0.00888826	1.12321	0.00016834	-0.127235	0.616277	-0.234663	0.298256
1935	Ssa#XM_014145158.1	Tribbles homolog 2	-0.437363	0.159307	-0.650608	0.0255427	-0.993241	0.00185451	-1.55839	0.000114387	-0.760016	0.0355436
1936	Ssa#XM_014145234.1	zinc finger protein 2-like	0.51378	0.251243	1.0358	0.0012061	1.57436	0.000124007	1.43861	0.00077647	1.05903	0.00631727
1937	Ssa#XM_014145238.1	zinc finger protein 239-like	0.474646	0.38091	0.945366	0.00553362	1.16899	0.0063056	1.73693	0.000923375	1.27552	0.00547061
1938	Ssa#XM_014145259.1	Forkhead box protein O3	-0.411202	0.0931577	-0.856416	0.00031959	-1.08948	0.000120845	-0.313984	0.20105	-0.357053	0.0560949
1939	Ssa#XM_014145262.1	Sestrin-1	0.78839	0.0952789	-0.144275	0.713437	-0.37852	0.400152	-1.54316	0.0209416	-1.14377	0.0721613
1940	Ssa#XM_014145277.1	Solute carrier family 22 member 16	-0.0412086	0.87678	-0.0481934	0.719713	0.443728	0.0641931	0.504866	0.35341	0.820472	0.000633724
1941	Ssa#XM_014145286.1	gastrula zinc finger protein XlCGF17.1-like	-0.142328	0.77719	0.378861	0.28264	-0.0108783	0.983711	1.05493	0.0305703	0.803469	0.0777007
1942	Ssa#XM_014145287.1	zinc finger protein 391-like	0.458268	0.0666594	0.745846	0.00279122	0.795706	0.00463091	1.17798	0.00175592	1.05424	0.0018609
1943	Ssa#XM_014145288.1	zinc finger protein 239-like	0.0646728	0.74953	0.0436478	0.832055	0.100271	0.582084	0.86335	0.0115883	0.514644	0.0261673
1944	Ssa#XM_014145289.1	Solute carrier family 27	-0.356155	0.298772	1.40727	0.00101801	2.30561	0.000319991	0.749521	0.0735269	-0.313359	0.382226
1945	Ssa#XM_014145290.1	zinc finger protein 135-like	0.517823	0.325078	1.06977	0.0293265	0.953373	0.0882792	1.4395	0.0272199	1.29782	0.0402989
1946	Ssa#XM_014145291.1	zinc finger protein 2 homolog	0.47429	0.256224	0.559016	0.130883	0.876088	0.049275	1.01087	0.0544575	1.16139	0.0315748
1947	Ssa#XM_014145394.1	Methyl-CpG-binding domain protein 4	-0.592064	0.109886	-1.03816	1.42001e-06	-0.988329	3.03827e-05	-0.939476	6.38104e-05	-1.0558	3.3049e-05
1948	Ssa#XM_014145400.1	interleukin-17 receptor E-like	-0.495373	0.0234912	-0.909145	5.90575e-05	-0.827646	0.000368601	-0.771135	0.00256117	-0.509804	0.0156204
1949	Ssa#XM_014145402.1	NACHT, LRR and PYD domains-containing protein 1	0.850377	0.0587167	1.26067	0.000195911	1.13299	0.00398764	1.17128	0.00598756	0.831386	0.0173926
1950	Ssa#XM_014145436.1	F-box and WD-40 domain protein FBXW14 - Ident 23	0.20267	0.515487	0.869118	0.00430528	0.774617	0.0299025	0.865705	0.024409	0.340322	0.366756
1951	Ssa#XM_014145440.1	Nuclear pore membrane glycoprotein 210	-0.632514	0.268489	-1.55362	0.000104667	-1.90485	0.000115231	-1.94613	0.000559585	-2.08967	0.000105888
1952	Ssa#XM_014145477.1	Cadherin-like protein 26	-0.491037	0.283839	-2.39974	6.87551e-05	-2.7087	0.000112828	-3.46251	3.68252e-05	-3.16464	9.94512e-05
1953	Ssa#XM_014145490.1	proteasome subunit alpha type-7-like	-0.814714	0.00344838	-0.666522	0.00665409	-1.07045	0.000558336	-0.745161	0.00604161	-0.125201	0.469763
1954	Ssa#XM_014145508.1	Nuclear receptor coactivator 2 [NCoA-2] - Ident 54	0.399234	0.322968	0.255049	0.393023	0.615635	0.0650008	0.0403814	0.905063	-0.861924	0.0357448
1955	Ssa#XM_014145545.1	Glucose-6-phosphate dehydrogenase	-0.858905	0.0310522	-1.17945	0.000246006	-1.40904	0.000174528	-1.18513	0.00181061	-0.784879	0.016605
1956	Ssa#XM_014145560.1	Poly	0.27476	0.184099	0.61268	0.00351119	0.975579	3.82494e-05	0.905333	0.00119645	0.720225	0.000823201
1957	Ssa#XM_014145579.1	VAMP	0.185297	0.574857	0.553758	0.00118615	0.747293	0.00119959	0.861364	0.000641931	0.907084	0.000518264
1958	Ssa#XM_014145582.1	protein PET100 homolog, mitochondrial-like	0.433074	0.108231	0.529971	0.0417367	0.704474	0.0189997	0.871348	0.00317108	0.529743	0.0589266
1959	Ssa#XM_014145590.1	zinc finger protein 677-like	0.357825	0.567591	1.07051	0.00776425	1.34915	0.00487483	1.32883	0.00908768	1.07186	0.0343667
1960	Ssa#XM_014145591.1	zinc finger protein 79-like	-1.54461	0.102106	-3.03865	2.59668e-05	-3.11656	8.48149e-05	-2.86332	0.000596004	-2.75867	0.000809528
1961	Ssa#XM_014145603.1	Serum/glucocorticoid regulated kinase 2 - Ident 95	0.812573	0.166823	1.04994	0.013736	0.579687	0.267873	-0.947782	0.133053	-0.785385	0.145052
1962	Ssa#XM_014145629.1	Peptidyl-glycine alpha-amidating monooxygenase	0.588972	0.0755334	0.834038	0.00660087	0.975831	0.003953	0.481314	0.14236	0.52062	0.140092
1963	Ssa#XM_014145635.1	Neurexin-1a-alpha - Ident 31	0.252009	0.168721	1.1606	6.61083e-05	1.45415	0.000500366	1.28293	0.00021667	0.716412	0.0100971
1964	Ssa#XM_014145664.1	Leucine rich repeat containing 47	0.82201	0.261977	1.79682	0.00914586	1.85646	0.0168525	2.07817	0.0187803	1.91445	0.0276126
1965	Ssa#XM_014145691.1	Matrix metallopeptidase 23bb	-0.204856	0.618078	0.112225	0.716743	0.184053	0.616838	-0.760481	0.100557	-1.1527	0.0171865
1966	Ssa#XM_014145694.1	E3 ubiquitin-protein ligase MIB2	0.944266	0.00730777	0.906193	0.000631107	1.33753	0.000119089	0.661415	0.0265271	0.234839	0.33578
1967	Ssa#XM_014145703.1	Dolichyl-diphosphooligosaccharide--protein glycosyltransferase 48 kDa subunit	-0.910832	0.0252187	-0.958306	0.0261551	-0.87214	0.0127606	-0.978848	0.0728681	-0.285472	0.49938
1968	Ssa#XM_014145742.1	Lysosomal amino acid transporter 1 homolog	-0.219615	0.474412	-0.315503	0.0784373	-0.246949	0.191796	-0.878127	0.000618534	-0.771538	0.00512096
1969	Ssa#XM_014145762.1	nudix hydrolase 20, chloroplastic-like	-0.563552	0.124261	-0.696871	0.0407831	-0.718487	0.0494217	-0.539205	0.155016	-0.839285	0.0488762
1970	Ssa#XM_014145778.1	Calsyntenin 1	-0.214716	0.517446	-0.691073	0.000139763	-0.756262	0.001392	-0.895993	6.63598e-05	-0.966304	9.78224e-05
1971	Ssa#XM_014145783.1	Ubiquitin conjugation factor E4 B	-0.268756	0.228685	-0.99182	7.7852e-05	-1.05167	8.3404e-05	-0.452616	0.00505011	-0.390674	0.00594533
1972	Ssa#XM_014145806.1	6-phosphogluconate dehydrogenase, decarboxylating	-0.552255	0.0467944	-0.174545	0.469814	-0.831777	0.000570159	-1.80798	0.000576483	-0.302801	0.0521665
1973	Ssa#XM_014145826.1	mannan-binding lectin serine peptidase 2	1.09964	0.0443173	1.86076	0.000402291	2.09443	0.000601571	1.80759	0.00495929	0.678969	0.237998
1974	Ssa#XM_014145829.1	Spermidine synthase	-0.46888	0.0287753	-0.725734	0.00153024	-1.4639	2.66747e-06	-0.0411396	0.860029	0.460862	0.0101187
1975	Ssa#XM_014145875.1	Pim-2 oncogene	0.53754	0.0212204	0.2854	0.117658	0.844203	0.0104255	0.655493	0.0109021	0.0671742	0.735515
1976	Ssa#XM_014145896.1	Rho GTPase-activating protein 39	0.887671	0.0532574	0.994894	0.000104341	0.874659	0.00834898	0.454077	0.0308638	0.412514	0.0301491
1977	Ssa#XM_014145909.1	Inhibitor of DNA binding 2, dominant negative helix-loop-helix protein, b	1.15393	0.0207276	1.33224	0.00116446	1.41596	0.00183306	1.15608	0.0283602	1.6556	0.00346407
1978	Ssa#XM_014145916.1	deoxyribonuclease gamma-like	-0.526429	0.192102	-0.760251	0.0207131	-0.642363	0.0628452	-0.648024	0.105937	-0.839336	0.0415972
1979	Ssa#XM_014145956.1	Activity-dependent neuroprotector homeobox protein	0.52716	0.175651	1.11398	0.000958312	1.19875	0.00139297	0.666491	0.0461178	0.505206	0.114316
1980	Ssa#XM_014145973.1	cyclin-G2-like	0.735191	0.122888	0.0483873	0.902684	0.951495	0.0495359	0.0907821	0.857869	0.23831	0.631902
1981	Ssa#XM_014145977.1	Neurotensin receptor type 1	0.07312	0.690313	0.358041	0.0846503	0.867116	0.000510318	0.650233	0.0245635	0.882516	0.00452902
1982	Ssa#XM_014145988.1	Methylenetetrahydrofolate reductase	0.147507	0.621174	1.14292	4.21055e-05	1.39896	0.00155809	1.92905	0.000258845	0.697837	0.0268528
1983	Ssa#XM_014146040.1	perlwapin-like	1.51722	0.0318421	1.1371	0.0517113	1.00537	0.171701	0.581927	0.323524	0.183156	0.790346
1984	Ssa#XM_014146064.1	coiled-coil domain containing 30	1.19822	0.0660422	1.91495	0.000121392	2.02565	0.000171081	1.47031	0.00504676	1.6815	0.0010081
1985	Ssa#XM_014146080.1	insulin-like growth factor I	-0.430291	0.374082	-1.59259	0.00485055	-1.07707	0.0362588	-0.587822	0.290056	-0.38159	0.43433
1986	Ssa#XM_014146087.1	DNA-damage regulated autophagy modulator 2	0.745698	0.0383216	0.808021	0.0316588	0.713886	0.0632915	0.503887	0.198292	0.405612	0.318092
1987	Ssa#XM_014146090.1	Serine/threonine kinase 38b	0.489704	0.348876	0.978775	0.00787471	1.25998	0.00400857	1.16118	0.012195	1.20461	0.0111884
1988	Ssa#XM_014146092.1	BTB/POZ domain-containing protein 10	-0.393076	0.0254922	0.0444418	0.797545	-0.246776	0.0448816	-0.214944	0.193749	0.897915	0.0044089
1989	Ssa#XM_014146136.1	intelectin	1.14056	0.00287992	0.705318	0.0162967	0.50119	0.0759402	0.132426	0.652016	0.710472	0.0836867
1990	Ssa#XM_014146144.1	Mitofusin 1	-0.414398	0.0978675	-0.630966	0.0049202	-0.792146	0.00189981	-0.819123	0.00492972	-0.576288	0.0171631
1991	Ssa#XM_014146168.1	WD repeat-containing protein WRAP73	0.544518	0.160309	0.995975	0.00265121	0.911305	0.00909708	0.518855	0.130135	0.577355	0.124604
1992	Ssa#XM_014146236.1	targeting protein for Xklp2-A-like	-1.1537	0.00431789	-0.597775	0.0261812	0.309789	0.191472	-1.14372	0.0270831	-0.447098	0.119003
1993	Ssa#XM_014146255.1	Asparagine--tRNA ligase, cytoplasmic	-0.124075	0.734944	0.180536	0.635155	-0.0172404	0.965829	1.11816	0.0515653	1.54739	0.00284714
1994	Ssa#XM_014146272.1	60S ribosomal protein L22	0.20306	0.153293	0.566295	0.000852604	0.704129	0.000368969	0.800786	0.00086732	0.675661	0.00277188
1995	Ssa#XM_014146315.1	DALR anticodon-binding domain-containing protein 3	0.39001	0.220821	0.817621	0.00335699	0.689638	0.00818728	0.52855	0.0768715	0.695007	0.0226469
1996	Ssa#XM_014146318.1	Cadherin, EGF LAG seven-pass G-type receptor 2, like	-0.772453	0.08584	-1.49592	0.00147862	-1.74507	0.00137148	-1.50193	0.00769237	-0.810244	0.126364
1997	Ssa#XM_014146331.1	Acylpeptide hydrolase	0.728948	0.000410756	0.703083	9.30839e-05	0.653531	0.000952103	0.878633	0.000321812	0.669324	0.00114043
1998	Ssa#XM_014146345.1	proline-rich extensin-like protein EPR1 (LOC106572299)	-1.38155	0.118932	-3.10188	1.20255e-05	-3.00557	4.44534e-05	-2.36634	0.00133364	-2.8611	0.000315069
[truncated: 3,710 more rows]
