# Supplementary material for: Expression Analysis in Atlantic Salmon Liver Reveals miRNAs Associated with Smoltification and Seawater Adaptation
Source: Biology (Basel). 2022 Apr 30;11(5):688. doi: 10.3390/biology11050688 (PMC9138835; doi:10.3390/biology11050688)
Supplement: Supplementary file 1 [file biology-11-00688-s001.zip › Table S5. Overview of enriched DE-mRNAs.xlsx]

## Sheet: Ark1
Table S5. Enriched GO groups and pathway associated with differentially expressed mRNAs (DEGs)
Annotation data categories1	Genes2	DE-mRNAs3	Expected genes4	Ratio5	Yates corrected Chi-square6	Anotation data set7
Metabolism Amine	29	14	3.9277	3.56442	8.14011e-05	STARS
Metabolism Steroid, bile	95	39	12.8666	3.0311	1.86072e-09	STARS
Cell Nucleus	87	32	11.7831	2.71575	9.56059e-07	STARS
Metabolism Energy	36	12	4.87577	2.46115	0.0100892	STARS
Metabolism Protein biosynthesis	383	113	51.8728	2.17841	1.1098e-13	STARS
Cell DNA repair	92	27	12.4603	2.16688	0.00049289	STARS
Tissue Secretory	206	58	27.9002	2.07884	7.33035e-07	STARS
Metabolism Amino acid	384	108	52.0082	2.0766	8.81716e-12	STARS
Cell Folding, protein modification	143	40	19.3676	2.0653	5.39163e-05	STARS
Cell DNA replication	126	35	17.0652	2.05096	0.000195016	STARS
Cell Stress	152	41	20.5866	1.99159	0.000100465	STARS
Tissue plasma	93	25	12.5957	1.9848	0.00303208	STARS
Cell Redox	108	29	14.6273	1.98259	0.00133012	STARS
Metabolism Sugar	309	77	41.8504	1.83989	1.56986e-06	STARS
Metabolism Protease inhibitor	119	29	16.1171	1.79933	0.00587082	STARS
Metabolism Iron heme	91	22	12.3249	1.78501	0.0197664	STARS
Metabolism RNA	537	127	72.7302	1.74618	1.18169e-08	STARS
Cell cycle	503	116	68.1253	1.70274	1.99067e-07	STARS
Metabolism Lipid	867	198	117.425	1.68619	1.62057e-11	STARS
Cell Lysosome	133	30	18.0133	1.66544	0.0149143	STARS
Immune Antigen presentation	102	23	13.8147	1.6649	0.0359819	STARS
Immune Complement	126	27	17.0652	1.58217	0.0393021	STARS
Metabolism Retinoid	146	31	19.774	1.56772	0.0291921	STARS
Cell Cytoskeleton microtubule	206	42	27.9002	1.50536	0.0192356	STARS
Glycine_ serine and threonine metabolism	69	29	9.34523	3.10319	1.56767e-07	KEGG
Mismatch repair	67	25	9.07435	2.75502	1.33092e-05	KEGG
DNA replication	94	35	12.7312	2.74916	2.00625e-07	KEGG
Terpenoid backbone biosynthesis	41	15	5.55296	2.70126	0.00125521	KEGG
Homologous recombination	68	24	9.20979	2.60592	5.50719e-05	KEGG
Biosynthesis of unsaturated fatty acids	40	14	5.41752	2.58421	0.00302399	KEGG
Steroid biosynthesis	47	16	6.36559	2.51351	0.00189677	KEGG
Retinol metabolism	98	33	13.2729	2.48626	5.24421e-06	KEGG
Pyruvate metabolism	119	40	16.1171	2.48183	4.84e-07	KEGG
Pentose and glucuronate interconversions	51	17	6.90734	2.46115	0.00168469	KEGG
Phenylalanine_ tyrosine and tryptophan biosynthesis	34	11	4.60489	2.38876	0.0181978	KEGG
Drug metabolism - cytochrome P450	79	25	10.6996	2.33653	0.00024927	KEGG
Primary bile acid biosynthesis	35	11	4.74033	2.32051	0.0225192	KEGG
Glutathione metabolism	81	25	10.9705	2.27884	0.000375409	KEGG
Phenylalanine metabolism	41	12	5.55296	2.16101	0.0281188	KEGG
PPAR signaling pathway	164	48	22.2118	2.16101	2.39255e-06	KEGG
Tryptophan metabolism	98	28	13.2729	2.10956	0.000598976	KEGG
Pentose phosphate pathway	81	23	10.9705	2.09654	0.00223354	KEGG
Drug metabolism - other enzymes	78	22	10.5642	2.08251	0.00311443	KEGG
p53 signaling pathway	150	42	20.3157	2.06737	3.33552e-05	KEGG
Complement and coagulation cascades	146	40	19.774	2.02286	8.69873e-05	KEGG
Metabolism of xenobiotics by cytochrome P450	77	21	10.4287	2.01367	0.00598481	KEGG
Nucleotide excision repair	63	17	8.5326	1.99236	0.01631	KEGG
Glycolysis / Gluconeogenesis	198	53	26.8167	1.97638	1.05853e-05	KEGG
Pyrimidine metabolism	242	64	32.776	1.95265	1.77752e-06	KEGG
Aminoacyl-tRNA biosynthesis	130	34	17.6069	1.93106	0.000769381	KEGG
RNA polymerase	71	18	9.6161	1.87186	0.0242363	KEGG
Arginine and proline metabolism	196	49	26.5459	1.84586	0.000139437	KEGG
Steroid hormone biosynthesis	70	17	9.48066	1.79312	0.0426648	KEGG
Fatty acid metabolism	109	26	14.7627	1.76119	0.0124641	KEGG
Proteasome	109	26	14.7627	1.76119	0.0124641	KEGG
Protein processing in endoplasmic reticulum	401	94	54.3107	1.73078	1.56508e-06	KEGG
RNA degradation	151	33	20.4511	1.6136	0.0161883	KEGG
Starch and sucrose metabolism	121	26	16.388	1.58653	0.0423503	KEGG
Porphyrin and chlorophyll metabolism	160	34	21.6701	1.56898	0.0214883	KEGG
Cell cycle	273	58	36.9746	1.56864	0.00216949	KEGG
antioxidant activity	57	29	7.71997	3.75649	1.24517e-09	GO
sterol biosynthetic process	35	16	4.74033	3.37529	4.69426e-05	GO
cholesterol biosynthetic process	109	46	14.7627	3.11595	2.01987e-11	GO
glycoprotein binding	19	8	2.57332	3.10882	0.0110336	GO
vitamin D receptor binding	50	20	6.7719	2.95338	3.876e-05	GO
triglyceride catabolic process	63	25	8.5326	2.92994	4.03217e-06	GO
aromatase activity	33	13	4.46946	2.90863	0.00141425	GO
creatine metabolic process	18	7	2.43788	2.87134	0.0299071	GO
amine metabolic process	27	10	3.65683	2.73461	0.00985249	GO
isoprenoid biosynthetic process	19	7	2.57332	2.72022	0.039688	GO
acute inflammatory response	49	17	6.63646	2.5616	0.00104301	GO
cholesterol efflux	52	18	7.04278	2.55581	0.000733631	GO
very-low-density lipoprotein particle	52	18	7.04278	2.55581	0.000733631	GO
complement activation_ alternative pathway	34	11	4.60489	2.38876	0.0181978	GO
microtubule-based process	99	31	13.4084	2.31199	4.85277e-05	GO
heme biosynthetic process	56	17	7.58453	2.2414	0.00486275	GO
glycogen catabolic process	57	17	7.71997	2.20208	0.00588518	GO
triglyceride biosynthetic process	54	16	7.31365	2.18769	0.00832406	GO
ferric iron binding	34	10	4.60489	2.1716	0.0478836	GO
linoleic acid metabolic process	82	24	11.1059	2.16101	0.00112678	GO
glycogen biosynthetic process	65	19	8.80347	2.15824	0.00427385	GO
natural killer cell mediated cytotoxicity	48	14	6.50103	2.15351	0.0166904	GO
steroid hydroxylase activity	80	23	10.835	2.12274	0.00188131	GO
MHC class I protein binding	46	13	6.23015	2.08663	0.0281359	GO
gluconeogenesis	177	50	23.9725	2.08572	4.1737e-06	GO
triglyceride metabolic process	77	21	10.4287	2.01367	0.00598481	GO
cholesterol homeostasis	250	68	33.8595	2.0083	2.85667e-07	GO
oxygen binding	99	26	13.4084	1.93909	0.00343269	GO
xenobiotic metabolic process	228	59	30.8799	1.91063	9.31535e-06	GO
retinoid metabolic process	196	50	26.5459	1.88353	7.03365e-05	GO
fatty acid biosynthetic process	131	33	17.7424	1.85995	0.00179474	GO
lipid homeostasis	159	40	21.5346	1.85747	0.000551098	GO
monooxygenase activity	173	43	23.4308	1.83519	0.000429903	GO
steroid biosynthetic process	98	24	13.2729	1.80819	0.0123334	GO
acute-phase response	90	22	12.1894	1.80484	0.017505	GO
peptidase inhibitor activity	153	37	20.722	1.78554	0.00191507	GO
stem cell differentiation	109	26	14.7627	1.76119	0.0124641	GO
steroid metabolic process	156	37	21.1283	1.7512	0.00270557	GO
apoptotic mitochondrial changes	76	18	10.2933	1.74871	0.045204	GO
mitochondrial matrix	773	182	104.694	1.73841	9.39641e-12	GO
ribosome	388	91	52.55	1.73169	2.28042e-06	GO
cholesterol metabolic process	230	52	31.1508	1.6693	0.000996863	GO
adipose tissue development	102	23	13.8147	1.6649	0.0359819	GO
proteasome complex	180	39	24.3788	1.59975	0.00970098	GO
iron ion binding	403	87	54.5815	1.59395	8.50061e-05	GO
Hsp70 protein binding	145	31	19.6385	1.57853	0.0267712	GO
lipid particle	300	64	40.6314	1.57514	0.00111526	GO
damaged DNA binding	160	34	21.6701	1.56898	0.0214883	GO
mitochondrion organization	193	41	26.1395	1.5685	0.0109263	GO
heme binding	390	82	52.8208	1.55242	0.000322951	GO
chromosome segregation	173	36	23.4308	1.53644	0.0237797	GO
NIK/NF-kappaB cascade	186	38	25.1915	1.50845	0.0259101	GO
defense response to virus	535	109	72.4594	1.50429	0.000105395	GO
chaperone binding	315	64	42.663	1.50013	0.00360996	GO
