# Supplementary material for: Expression Analysis in Atlantic Salmon Liver Reveals miRNAs Associated with Smoltification and Seawater Adaptation
Source: Biology (Basel). 2022 Apr 30;11(5):688. doi: 10.3390/biology11050688 (PMC9138835; doi:10.3390/biology11050688)
Supplement: Supplementary file 1 [file biology-11-00688-s001.zip › Table S6. List of all predicted targets of guide DE-miRNAs.xlsx]

## Sheet: Sheet2
Table S6. List of all predicted target genes of gDE-miRNAs. Column B (FL-transcript accessions) shows full-length splicevariants and paralogs of the genes with same 3'UTRs
Gene symbol	Transcript Accessions	Accessions (60 bp Probe derived from DE-mRNAs)	Targeting miRNAs	Blast descriptions	GO terms
AATM	GIYK01026941,GIYK01057178,GIYK01040705,GIYK01040710,GIYK01040707,GIYK01040708,GIYK01025415,GIYK01040709,GIYK01040704,GIYK01057180,GIYK01040706,GIYK01057181	Ssa#XM_014175760.1,Ssa#XM_014175760.1,Ssa#XM_014149093.1,Ssa#XM_014149093.1,Ssa#XM_014149093.1,Ssa#XM_014149093.1,Ssa#XM_014200937.1,Ssa#XM_014157892.1,Ssa#XM_014149093.1,Ssa#XM_014175760.1,Ssa#XM_014149093.1,Ssa#XM_014175760.1	ssa-miR-15e-5p,ssa-miR-101a-3p,ssa-miR-146d-5p,ssa-miR-8163-5p,ssa-miR-216c-3p,ssa-miR-novel-16-3p,ssa-miR-222a-5p,ssa-miR-15d-5p,ssa-miR-301a-5p,ssa-miR-19a-2-3p,ssa-miR-218a-5p,ssa-miR-novel-13-5p,ssa-miR-18bc-5p,ssa-miR-203b-3p,ssa-miR-457ab-5p,ssa-miR-novel-16-5p,ssa-miR-200b-3p,ssa-miR-101b-3p,ssa-miR-205b-5p,ssa-miR-214-1-2-3p,ssa-miR-214-3-3p	aspartate aminotransferase, mitochondrial-like	L-aspartate:2-oxoglutarate aminotransferase activity,cellular amino acid metabolic process,pyridoxal phosphate binding,biosynthetic process
AATM	GIYK01057179,GIYK01026944	Ssa#XM_014175760.1,Ssa#XM_014175760.1	ssa-miR-200b-3p,ssa-miR-222a-5p,ssa-miR-214-1-2-3p,ssa-miR-301a-5p,ssa-miR-19a-2-3p,ssa-miR-214-3-3p	aspartate aminotransferase, mitochondrial-like	L-aspartate:2-oxoglutarate aminotransferase activity,cellular amino acid metabolic process,pyridoxal phosphate binding,biosynthetic process
AATM	GIYK01026945,GIYK01026942	Ssa#XM_014175760.1,Ssa#XM_014175760.1	ssa-miR-200b-3p,ssa-miR-214-1-2-3p,ssa-miR-301a-5p,ssa-miR-19a-2-3p,ssa-miR-214-3-3p	aspartate aminotransferase, mitochondrial-like	L-aspartate:2-oxoglutarate aminotransferase activity,cellular amino acid metabolic process,pyridoxal phosphate binding,biosynthetic process
AATM	GIYK01026943	Ssa#XM_014175760.1	ssa-miR-200b-3p,ssa-miR-214-1-2-3p,ssa-miR-301a-5p,ssa-miR-19a-2-3p,ssa-miR-214-3-3p	aspartate aminotransferase, mitochondrial-like	cellular amino acid metabolic process,pyridoxal phosphate binding,biosynthetic process,transaminase activity
AATF	GIYK01010631	Ssa#XM_014196706.1	ssa-miR-214-1-2-3p	protein AATF	nucleus
AARS1	GIYK01025353	Ssa#NM_001140078.1	ssa-miR-novel-16-5p	alanine--tRNA ligase, cytoplasmic	alanyl-tRNA aminoacylation,ATP binding,cytoplasm,alanine-tRNA ligase activity,tRNA binding,zinc ion binding
AACS	GIYK01055376	Ssa#XM_014172663.1	ssa-miR-210-1-5p	acetoacetyl-CoA synthetase	positive regulation of insulin secretion,ATP binding,acetoacetate-CoA ligase activity,fatty acid metabolic process,integral component of membrane,cytosol
ZYG11B	GIYK01035758	Ssa#XM_014140748.1	ssa-miR-15d-5p,ssa-miR-15e-5p,ssa-miR-457ab-5p	protein zyg-11 homolog isoform X1	Cul2-RING ubiquitin ligase complex
ZW10	GIYK01033687,GIYK01033690,GIYK01033688,GIYK01033691	Ssa#XM_014137342.1,Ssa#XM_014137342.1,Ssa#XM_014137342.1,Ssa#XM_014137342.1	ssa-miR-17-5p,ssa-miR-106a-5p,ssa-miR-106b-5p,ssa-miR-93a-5p,ssa-miR-20a-5p,ssa-miR-214-3-3p	centromere/kinetochore protein zw10 homolog isoform X3	chromosome centromeric region,nucleus,mitotic cell cycle
ZW10	GIYK01033692,GIYK01033694,GIYK01033689	Ssa#XM_014137342.1,Ssa#XM_014137342.1,Ssa#XM_014137342.1	ssa-miR-17-5p,ssa-miR-106a-5p,ssa-miR-106b-5p,ssa-miR-93a-5p,ssa-miR-20a-5p,ssa-miR-214-3-3p	centromere/kinetochore protein zw10 homolog	chromosome centromeric region,nucleus,mitotic cell cycle
zranb1	GIYK01044685	Ssa#XM_014154718.1	ssa-miR-218a-5p,ssa-miR-146d-5p,ssa-miR-146b-5p,ssa-miR-146a-5p
zranb1	GIYK01044684	Ssa#XM_014154718.1	ssa-miR-218a-5p,ssa-miR-146d-5p,ssa-miR-146b-5p,ssa-miR-146a-5p	ubiquitin thioesterase Zranb1-like	metal ion binding
ZP3	GIYK01025599	Ssa#XM_014124960.1	ssa-miR-214-1-2-3p,ssa-miR-214-3-3p	zona pellucida sperm-binding protein 3-like	structural constituent of egg coat,binding of sperm to zona pellucida,egg coat formation
ZNRF2	GIYK01037401,GIYK01037402	Ssa#XM_014178102.1,Ssa#XM_014178102.1	ssa-miR-101b-3p,ssa-miR-15e-5p,ssa-miR-101a-3p,ssa-miR-15d-5p,ssa-miR-214-1-2-3p,ssa-miR-551a-3p	E3 ubiquitin-protein ligase ZNRF2-like	ligase activity
ZNHIT1	GIYK01017380	Ssa#XM_014206733.1	ssa-miR-200b-3p	zinc finger HIT domain-containing protein 1	histone exchange,metal ion binding
ZNF883	GIYK01001383,GIYK01001382,GIYK01001385,GIYK01001384	Ssa#XM_014201754.1,Ssa#XM_014201754.1,Ssa#XM_014201754.1,Ssa#XM_014201754.1	ssa-miR-15e-5p,ssa-miR-218a-5p,ssa-miR-200b-3p,ssa-miR-15d-5p,ssa-miR-214-3-3p	zinc finger protein 883-like	nucleic acid binding
ZNF883	GIYK01044962	Ssa#XM_014155174.1	ssa-miR-19a-2-3p	zinc finger protein 883
ZNF850	GIYK01006340	Ssa#XM_014185876.1	ssa-miR-30a-1-2-5p,ssa-miR-30a-3-4-5p,ssa-let-7e-5p,ssa-miR-30e-5p,ssa-miR-214-1-2-3p,ssa-miR-214-3-3p	zinc finger protein 850-like isoform X1
ZNF704	GIYK01058560	Ssa#XM_014178263.1	ssa-miR-205b-5p	zinc finger protein 704	nucleic acid binding
ZNF574	GIYK01004328,GIYK01004327	Ssa#XM_014156860.1,Ssa#XM_014156860.1	ssa-miR-novel-12-5p	zinc finger protein 574-like	nucleic acid binding
ZNF518A	GIYK01044288	Ssa#XM_014154198.1	ssa-miR-novel-13-5p	zinc finger protein 518A-like	nucleic acid binding
ZNF473	GIYK01009592	Ssa#XM_014132180.1	ssa-miR-210-1-5p	zinc finger protein 473 homolog isoform X4	nucleic acid binding
znf423	GIYK01040788	Ssa#XM_014124251.1	ssa-miR-205b-5p	zinc finger protein 423 isoform X1
znf423	GIYK01025342	Ssa#XM_014124251.1	ssa-miR-205b-5p	zinc finger protein 423 isoform X2	nucleic acid binding
ZNF407	GIYK01012975	Ssa#XM_014200354.1	ssa-miR-221-3p,ssa-miR-222b-3p,ssa-miR-novel-12-5p	zinc finger protein 407-like
ZNF395	GIYK01000244,GIYK01000247,GIYK01000243,GIYK01000242,GIYK01000249,GIYK01000248,GIYK01000246,GIYK01000236,GIYK01000240,GIYK01000245,GIYK01000238,GIYK01000241,GIYK01000239,GIYK01000235,GIYK01000237	Ssa#XM_014136494.1,Ssa#XM_014136494.1,Ssa#XM_014136494.1,Ssa#XM_014136494.1,Ssa#XM_014136494.1,Ssa#XM_014136494.1,Ssa#XM_014136494.1,Ssa#XM_014136494.1,Ssa#XM_014136494.1,Ssa#XM_014136494.1,Ssa#XM_014136494.1,Ssa#XM_014136494.1,Ssa#XM_014136494.1,Ssa#XM_014136494.1,Ssa#XM_014136494.1	ssa-miR-101b-3p,ssa-miR-15e-5p,ssa-miR-222b-3p,ssa-miR-101a-3p,ssa-miR-15d-5p,ssa-miR-221-3p,ssa-miR-457ab-5p	zinc finger protein 395-like isoform X1	nucleic acid binding
ZNF367	GIYK01054132	Ssa#XM_014171108.1	ssa-miR-17-5p,ssa-miR-106a-5p,ssa-miR-106b-5p,ssa-miR-205b-5p,ssa-miR-18bc-5p,ssa-miR-222a-5p,ssa-miR-8163-5p,ssa-miR-216c-3p,ssa-miR-20a-5p	zinc finger protein 367	nucleic acid binding
ZNF367	GIYK01054133,GIYK01054134	Ssa#XM_014171108.1,Ssa#XM_014171108.1	ssa-miR-17-5p,ssa-miR-106a-5p,ssa-miR-106b-5p,ssa-miR-205b-5p,ssa-miR-18bc-5p,ssa-miR-222a-5p,ssa-miR-8163-5p,ssa-miR-301a-5p,ssa-miR-216c-3p,ssa-miR-20a-5p	zinc finger protein 367	nucleic acid binding
ZNF346	GIYK01033823,GIYK01033824	Ssa#XM_014137996.1,Ssa#XM_014137996.1	ssa-miR-551a-3p,ssa-miR-214-3-3p	zinc finger protein 346-like isoform X1	nucleic acid binding,zinc ion binding
ZNF330	GIYK01071036	Ssa#XM_014184011.1	ssa-miR-210-1-5p	Zinc finger protein 330	zinc ion binding,nucleus
ZNF330	GIYK01009493,GIYK01061277	Ssa#XM_014184011.1,Ssa#XM_014184011.1	ssa-miR-210-1-5p	Zinc finger protein 330	zinc ion binding,nucleus
znf277	GIYK01026003,GIYK01026004	Ssa#XM_014125562.1,Ssa#XM_014125562.1	ssa-miR-17-5p,ssa-miR-106a-5p,ssa-miR-106b-5p,ssa-miR-novel-16-3p,ssa-miR-200b-3p	zinc finger protein 277 isoform X1	,nucleic acid binding
ZNF23	GIYK01018976	Ssa#XM_014209269.1	ssa-miR-101b-3p,ssa-miR-101a-3p,ssa-let-7e-5p,ssa-miR-206-3p,ssa-miR-200b-3p	zinc finger protein 23-like	nucleic acid binding
ZMYM1	GIYK01051513	Ssa#XM_014166411.1	ssa-miR-301a-5p,ssa-miR-462b-5p,ssa-miR-novel-16-3p	zinc finger MYM-type protein 1-like
ZMYM1	GIYK01006089	Ssa#XM_014166411.1	ssa-miR-301a-5p,ssa-miR-462b-5p,ssa-miR-novel-16-3p	zinc finger MYM-type protein 1-like
ZMYM1	GIYK01059510,GIYK01059509	Ssa#XM_014166411.1,Ssa#XM_014166411.1	ssa-miR-8163-3p	zinc finger MYM-type protein 1-like	protein dimerization activity
ZKSCAN7	GIYK01018979	Ssa#XM_014209277.1	ssa-miR-101b-3p,ssa-miR-101a-3p,ssa-miR-200b-3p	oocyte zinc finger protein XlCOF19-like
ZKSCAN7	GIYK01018980	Ssa#XM_014209277.1	ssa-miR-101b-3p,ssa-miR-101a-3p,ssa-miR-200b-3p	zinc finger protein 8-like, Zinc finger protein with KRAB and SCAN domains 7	nucleic acid binding
ZKSCAN1	GIYK01018975	Ssa#XM_014195111.1	ssa-miR-101b-3p,ssa-miR-101a-3p,ssa-miR-200b-3p	zinc finger protein 583-like	nucleic acid binding
ZFYVE19	GIYK01000478,GIYK01000477,GIYK01000476	Ssa#XM_014164706.1,Ssa#XM_014164706.1,Ssa#XM_014164706.1	ssa-miR-455-3p	abscission/NoCut checkpoint regulator	metal ion binding
ZFYVE1	GIYK01022244	Ssa#XM_014169557.1	ssa-miR-101b-3p,ssa-miR-1-3p,ssa-miR-153a-3p,ssa-miR-218a-5p,ssa-miR-101a-3p,ssa-miR-17-5p,ssa-miR-106a-5p,ssa-miR-106b-5p,ssa-miR-93a-5p,ssa-miR-novel-16-3p,ssa-miR-206-3p,ssa-miR-301a-5p,ssa-miR-216c-3p,ssa-miR-20a-5p,ssa-miR-122-2-3p	zinc finger FYVE domain-containing protein 1-like	metal ion binding
ZFYVE1	GIYK01022245	Ssa#XM_014169557.1	ssa-miR-101b-3p,ssa-miR-1-3p,ssa-miR-153a-3p,ssa-miR-218a-5p,ssa-miR-101a-3p,ssa-miR-17-5p,ssa-miR-106a-5p,ssa-miR-106b-5p,ssa-miR-93a-5p,ssa-miR-novel-16-3p,ssa-miR-206-3p,ssa-miR-301a-5p,ssa-miR-216c-3p,ssa-miR-20a-5p,ssa-miR-122-2-3p		metal ion binding
ZFYVE1	GIYK01000537	Ssa#XM_014178485.1	ssa-miR-15e-5p,ssa-miR-218a-5p,ssa-miR-15d-5p,ssa-miR-457ab-5p,ssa-miR-214-1-2-3p,ssa-miR-8163-5p,ssa-miR-novel-16-3p,ssa-miR-214-3-3p	zinc finger FYVE domain-containing protein 1-like	GTP binding,zinc ion binding,GTPase activity
ZFPM1	GIYK01040809	Ssa#NM_001141433.2	ssa-miR-15e-5p,ssa-miR-93a-5p,ssa-miR-106b-5p,ssa-miR-15d-5p,ssa-miR-551a-3p,ssa-miR-216c-3p	zinc finger protein ZFPM1-like isoform X1	RNA polymerase II transcription factor binding,regulation of transcription by RNA polymerase II,nucleic acid binding
ZFP91	GIYK01018874,GIYK01009762,GIYK01018873	Ssa#XM_014209019.1,Ssa#XM_014209019.1,Ssa#XM_014209019.1	ssa-miR-221-3p,ssa-miR-222b-3p	E3 ubiquitin-protein ligase ZFP91-like	nucleic acid binding,ligase activity
ZFP69	GIYK01009595	Ssa#XM_014209269.1	ssa-miR-200b-3p	gastrula zinc finger protein XlCGF48.2-like isoform X1	nucleic acid binding
ZFP36L2	GIYK01001370,GIYK01001371	Ssa#XM_014200584.1,Ssa#XM_014200584.1	ssa-miR-221-3p,ssa-miR-222b-3p,ssa-miR-novel-16-3p,ssa-miR-19a-2-3p	mRNA decay activator protein ZFP36L2-A-like,mRNA decay activator protein ZFP36L2	metal ion binding
ZFP36L1	GIYK01017034,GIYK01017026,GIYK01017029,GIYK01017030,GIYK01017025,GIYK01017037,GIYK01017040,GIYK01017031,GIYK01017032,GIYK01017027,GIYK01017036,GIYK01017038,GIYK01017035,GIYK01017028,GIYK01017039,GIYK01017033	Ssa#XM_014205943.1,Ssa#XM_014205943.1,Ssa#XM_014205943.1,Ssa#XM_014205943.1,Ssa#XM_014205943.1,Ssa#XM_014205943.1,Ssa#XM_014205943.1,Ssa#XM_014205943.1,Ssa#XM_014205943.1,Ssa#XM_014205943.1,Ssa#XM_014205943.1,Ssa#XM_014205943.1,Ssa#XM_014205943.1,Ssa#XM_014205943.1,Ssa#XM_014205943.1,Ssa#XM_014205943.1	ssa-miR-15e-5p,ssa-miR-15d-5p,ssa-miR-457ab-5p,ssa-miR-206-3p,ssa-miR-216c-3p,ssa-miR-novel-16-3p,ssa-miR-200b-3p	zinc finger protein 36, C3H1 type-like 1 isoform X3	metal ion binding
zfp36l1	GIYK01038398	Ssa#XM_014144961.1	ssa-miR-1-3p,ssa-miR-17-5p,ssa-miR-106a-5p,ssa-miR-106b-5p,ssa-miR-93a-5p,ssa-miR-206-3p,ssa-miR-20a-5p,ssa-miR-200b-3p		metal ion binding
ZFP36	GIYK01048935,GIYK01048936,GIYK01022047,GIYK01022046	Ssa#XM_014162065.1,Ssa#XM_014162065.1,Ssa#NM_001140451.1,Ssa#NM_001140451.1	ssa-miR-222b-3p,ssa-miR-17-5p,ssa-miR-106a-5p,ssa-miR-106b-5p,ssa-miR-93a-5p,ssa-miR-novel-13-5p,ssa-miR-221-3p,ssa-miR-206-3p,ssa-miR-20a-5p	mRNA decay activator protein ZFP36-like	metal ion binding
ZFAND5	GIYK01003097	Ssa#NM_001141628.1	ssa-miR-8163-5p,ssa-miR-218a-5p	AN1-type zinc finger protein 5	DNA binding,zinc ion binding
ZFAND2A	GIYK01015581	Ssa#XM_014203976.1	ssa-miR-15e-5p,ssa-miR-205b-5p,ssa-miR-15d-5p,ssa-miR-221-3p,ssa-miR-457ab-5p,ssa-miR-206-3p,ssa-miR-200b-3p	AN1-type zinc finger protein 2A-like isoform X1	zinc ion binding
ZER1	GIYK01053302	Ssa#XM_014169358.1	ssa-miR-101b-3p,ssa-miR-101a-3p,ssa-miR-205b-5p,ssa-miR-206-3p,ssa-miR-8163-5p,ssa-miR-19a-2-3p	protein zyg-11 homolog isoform X1	protein binding,Cul2-RING ubiquitin ligase complex
ZDHHC7	GIYK01025033,GIYK01025028,GIYK01025025,GIYK01025026	Ssa#XM_014124683.1,Ssa#XM_014124683.1,Ssa#XM_014124683.1,Ssa#XM_014124683.1	ssa-miR-101b-3p,ssa-miR-222b-3p,ssa-miR-218a-5p,ssa-miR-101a-3p,ssa-miR-146b-5p,ssa-miR-221-3p,ssa-let-7e-5p,ssa-miR-462b-5p,ssa-miR-146d-5p,ssa-miR-214-1-2-3p,ssa-miR-146a-5p,ssa-miR-216c-3p,ssa-miR-214-3-3p	palmitoyltransferase ZDHHC7-like isoform X1	integral component of membrane,protein-cysteine S-palmitoyltransferase activity
ZDHHC7	GIYK01025032,GIYK01025030,GIYK01025029	Ssa#XM_014124683.1,Ssa#XM_014124683.1,Ssa#XM_014124683.1	ssa-miR-101b-3p,ssa-miR-101a-3p,ssa-let-7e-5p,ssa-miR-462b-5p,ssa-miR-216c-3p,ssa-miR-214-3-3p	palmitoyltransferase ZDHHC7-like isoform X1	integral component of membrane,protein-cysteine S-palmitoyltransferase activity
ZDHHC7	GIYK01025031,GIYK01025027	Ssa#XM_014124683.1,Ssa#XM_014124683.1	ssa-miR-101b-3p,ssa-miR-218a-5p,ssa-miR-101a-3p,ssa-miR-146b-5p,ssa-let-7e-5p,ssa-miR-462b-5p,ssa-miR-146d-5p,ssa-miR-214-1-2-3p,ssa-miR-146a-5p,ssa-miR-216c-3p,ssa-miR-214-3-3p	palmitoyltransferase ZDHHC7-like isoform X2	palmitoyltransferase activity
ZDHHC2	GIYK01001180	Ssa#XM_014139800.1	ssa-miR-222b-3p,ssa-miR-146b-5p,ssa-miR-222a-5p,ssa-miR-221-3p,ssa-miR-146d-5p,ssa-miR-146a-5p	putative ZDHHC-type palmitoyltransferase 6 isoform X1	integral component of membrane,protein binding,protein-cysteine S-palmitoyltransferase activity
zdhhc16	GIYK01044162,GIYK01044160,GIYK01044164,GIYK01044163,GIYK01044165	Ssa#XM_014154328.1,Ssa#XM_014154328.1,Ssa#XM_014154328.1,Ssa#XM_014154328.1,Ssa#XM_014154328.1	ssa-miR-novel-13-5p	palmitoyltransferase ZDHHC16A-like isoform X2	palmitoyltransferase activity
ZDBF2	GIYK01043109,GIYK01042193,GIYK01043110	Ssa#XM_014150906.1,Ssa#XM_014150906.1,Ssa#XM_014150906.1	ssa-miR-15e-5p,ssa-miR-205b-5p,ssa-miR-222a-5p,ssa-miR-15d-5p,ssa-miR-221-3p,ssa-miR-551a-3p,ssa-miR-457ab-5p,ssa-miR-301a-5p,ssa-miR-19a-2-3p,ssa-miR-novel-12-5p	DBF4-type zinc finger-containing protein 2,DBF4-type zinc finger-containing protein 2 isoform X1	nucleic acid binding,zinc ion binding
ZCCHC8	GIYK01048310	Ssa#XM_014165815.1	ssa-miR-101b-3p,ssa-miR-214-3-3p,ssa-miR-novel-16-3p,ssa-miR-200b-3p	zinc finger CCHC domain-containing protein 8	nucleic acid binding,zinc ion binding
Zc4h2	GIYK01063199,GIYK01011907,GIYK01011908	Ssa#XM_014213121.1,Ssa#XM_014213121.1,Ssa#XM_014213121.1	ssa-miR-30a-1-2-5p,ssa-miR-30a-3-4-5p,ssa-miR-novel-13-5p,ssa-miR-200b-3p	zinc finger C4H2 domain-containing protein	neuron fate specification,spinal cord motor neuron differentiation,neuromuscular junction development,positive regulation of neuron differentiation,nucleus,neuron development
Zc4h2	GIYK01063196	Ssa#XM_014213121.1	ssa-miR-200b-3p	zinc finger C4H2 domain-containing protein	neuron fate specification,spinal cord motor neuron differentiation,neuromuscular junction development,positive regulation of neuron differentiation,nucleus,neuron development
Zc4h2	GIYK01063200,GIYK01063197,GIYK01063198	Ssa#XM_014213121.1,Ssa#XM_014213121.1,Ssa#XM_014213121.1	ssa-miR-216c-3p,ssa-miR-200b-3p	zinc finger C4H2 domain-containing protein isoform X2,zinc finger C4H2 domain-containing protein isoform X3	cytoplasm,postsynaptic membrane,spinal cord motor neuron differentiation,neuromuscular junction development,positive regulation of neuron differentiation,nucleus
ZC3H3	GIYK01024344	Ssa#XM_014123293.1	ssa-miR-203b-3p	zinc finger CCCH domain-containing protein 3-like	metal ion binding
ZBTB39	GIYK01039839	Ssa#XM_014135947.1	ssa-miR-novel-10-3p	zinc finger and BTB domain-containing protein 39
ZBTB3	GIYK01012043,GIYK01021480,GIYK01021481	Ssa#XM_014198931.1,Ssa#XM_014212894.1,Ssa#XM_014212894.1	ssa-miR-101b-3p,ssa-miR-1-3p,ssa-miR-101a-3p,ssa-miR-206-3p	zinc finger and BTB domain-containing protein 3-like	nucleic acid binding,protein binding
ZBTB2	GIYK01016793	Ssa#XM_014205624.1	ssa-miR-30a-1-2-5p,ssa-miR-101b-3p,ssa-miR-218a-5p,ssa-miR-101a-3p,ssa-miR-30a-3-4-5p,ssa-miR-222a-5p,ssa-miR-30e-5p,ssa-miR-214-1-2-3p,ssa-miR-novel-16-5p,ssa-miR-214-3-3p	zinc finger and BTB domain-containing protein 2	nucleic acid binding,protein binding
ZBTB16	GIYK01011206,GIYK01011205	Ssa#XM_014137360.1,Ssa#XM_014137360.1	ssa-miR-101b-3p,ssa-miR-218a-5p,ssa-miR-101a-3p,ssa-miR-146b-5p,ssa-miR-novel-16-3p,ssa-let-7e-5p,ssa-miR-146d-5p,ssa-miR-146a-5p,ssa-miR-214-3-3p,ssa-miR-216c-3p,ssa-miR-200b-3p	zinc finger and BTB domain-containing protein 16-A isoform X1	nucleic acid binding,,protein binding
YWHAZ	GIYK01016099,GIYK01016100	Ssa#XM_014206628.1,Ssa#XM_014206628.1	ssa-miR-101b-3p,ssa-miR-101a-3p,ssa-miR-17-5p,ssa-miR-106a-5p,ssa-miR-106b-5p,ssa-miR-93a-5p,ssa-miR-novel-13-5p,ssa-miR-214-1-2-3p,ssa-miR-20a-5p,ssa-miR-214-3-3p	14-3-3 protein zeta
YIPF7	GIYK01009149,GIYK01009144,GIYK01009150,GIYK01009145,GIYK01014772,GIYK01014773,GIYK01009148,GIYK01009143,GIYK01009146	Ssa#XM_014203139.1,Ssa#XM_014203139.1,Ssa#XM_014203139.1,Ssa#XM_014203139.1,Ssa#XM_014203139.1,Ssa#XM_014203139.1,Ssa#XM_014203139.1,Ssa#XM_014203139.1,Ssa#XM_014203139.1	ssa-miR-101b-3p,ssa-miR-222b-3p,ssa-miR-101a-3p,ssa-miR-17-5p,ssa-miR-93a-5p,ssa-miR-205b-5p,ssa-miR-221-3p,ssa-miR-8163-5p	protein YIPF1-like	integral component of membrane,Golgi apparatus,vesicle-mediated transport
YIPF7	GIYK01009147	Ssa#XM_014203139.1	ssa-miR-101b-3p,ssa-miR-222b-3p,ssa-miR-17-5p,ssa-miR-93a-5p,ssa-miR-205b-5p,ssa-miR-221-3p,ssa-miR-8163-5p	protein YIPF1-like	integral component of membrane,Golgi apparatus,vesicle-mediated transport
YIPF7	GIYK01014775,GIYK01014774,GIYK01014776	Ssa#XM_014203139.1,Ssa#XM_014203139.1,Ssa#XM_014203139.1	ssa-miR-101b-3p,ssa-miR-222b-3p,ssa-miR-101a-3p,ssa-miR-221-3p,ssa-miR-8163-5p,ssa-miR-551a-3p,ssa-miR-216c-3p,ssa-miR-200b-3p		Golgi apparatus,vesicle-mediated transport
YIF1B	GIYK01022056,GIYK01022053,GIYK01022052,GIYK01022054,GIYK01022051,GIYK01022055	Ssa#XM_014214151.1,Ssa#XM_014214151.1,Ssa#XM_014214151.1,Ssa#XM_014214151.1,Ssa#XM_014214151.1,Ssa#XM_014214151.1	ssa-let-7e-5p,ssa-miR-218a-5p,ssa-miR-222a-5p	protein YIF1B-like isoform X2,protein YIF1B-like isoform X1	endoplasmic reticulum membrane,integral component of membrane,endoplasmic reticulum to Golgi vesicle-mediated transport
YIF1A	GIYK01020928	Ssa#XM_014212143.1	ssa-miR-30a-1-2-5p,ssa-miR-30a-3-4-5p,ssa-miR-462b-5p,ssa-miR-30e-5p,ssa-miR-novel-16-5p,ssa-miR-214-3-3p	protein YIF1A-like	endoplasmic reticulum membrane,integral component of membrane,endoplasmic reticulum to Golgi vesicle-mediated transport
YES1	GIYK01046242,GIYK01046241	Ssa#XM_014157818.1,Ssa#XM_014157818.1	ssa-miR-101b-3p,ssa-miR-203b-3p,ssa-miR-101a-3p	tyrosine-protein kinase Yes	ATP binding,non-membrane spanning protein tyrosine kinase activity,protein binding,peptidyl-tyrosine phosphorylation
XPP1	GIYK01029004,GIYK01029003	Ssa#XM_014179303.1,Ssa#XM_014179303.1	ssa-miR-221-3p,ssa-miR-222b-3p,ssa-miR-218a-5p,ssa-miR-novel-12-5p	xaa-Pro aminopeptidase 1 isoform X1	proteolysis,metal ion binding,metalloaminopeptidase activity
XPOT	GIYK01065938,GIYK01065941,GIYK01065942,GIYK01065940,GIYK01065939,GIYK01065937	Ssa#XM_014186034.1,Ssa#XM_014186034.1,Ssa#XM_014186034.1,Ssa#XM_014186034.1,Ssa#XM_014186034.1,Ssa#XM_014186034.1	ssa-miR-novel-13-5p	exportin-T	Ran GTPase binding,tRNA re-export from nucleus,cytoplasm,tRNA binding,nucleus
XPOT	GIYK01029476,GIYK01005491,GIYK01005494,GIYK01005492,GIYK01005493,GIYK01029473,GIYK01029474,GIYK01029475,GIYK01005495	Ssa#XM_014172449.1,Ssa#XM_014172449.1,Ssa#XM_014172449.1,Ssa#XM_014172449.1,Ssa#XM_014172449.1,Ssa#XM_014172449.1,Ssa#XM_014172449.1,Ssa#XM_014172449.1,Ssa#XM_014172449.1	ssa-miR-218a-5p,ssa-miR-17-5p,ssa-miR-93a-5p,ssa-miR-novel-13-5p,ssa-let-7e-5p,ssa-miR-214-1-2-3p,ssa-miR-novel-16-5p,ssa-miR-19a-2-3p	exportin-1	Ran GTPase binding,nuclear export signal receptor activity,intracellular protein transport,nuclear export,brain development,nucleus
XPNPEP2	GIYK01020553	Ssa#XM_014211821.1	ssa-miR-17-5p,ssa-miR-106a-5p,ssa-miR-106b-5p,ssa-miR-93a-5p,ssa-miR-214-1-2-3p,ssa-miR-20a-5p	xaa-Pro aminopeptidase 2	proteolysis,metal ion binding,metalloaminopeptidase activity,integral component of membrane
xpf	GIYK01059489,GIYK01059490	Ssa#XM_014179670.1,Ssa#XM_014179670.1	ssa-miR-101a-3p	DNA repair endonuclease XPF	endodeoxyribonuclease activity,nucleic acid phosphodiester bond hydrolysis,DNA repair,single-stranded DNA binding
XPA	GIYK01009622	Ssa#XM_014195312.1	ssa-miR-1-3p,ssa-miR-214-3-3p,ssa-miR-205b-5p,ssa-miR-206-3p	DNA repair protein complementing XP-A cells	damaged DNA binding,host cell nucleus,nucleotide-excision repair
XK	GIYK01012585	Ssa#XM_014212212.1	ssa-miR-novel-1-3p,ssa-miR-200b-3p	membrane transport protein XK-like	integral component of membrane
XIRP2	GIYK01041813	Ssa#XM_014151750.1	ssa-miR-novel-13-5p,ssa-miR-205b-5p		actin binding,heart development,actin cytoskeleton organization
XIRP2	GIYK01042685,GIYK01042682,GIYK01042683,GIYK01042684,GIYK01042681	Ssa#XM_014151750.1,Ssa#XM_014151750.1,Ssa#XM_014151750.1,Ssa#XM_014151750.1,Ssa#XM_014151750.1	ssa-miR-101b-3p,ssa-miR-101a-3p	xin actin-binding repeat-containing protein 2-like,xin actin-binding repeat-containing protein 2-like isoform X3	integral component of membrane,metal ion binding,negative regulation of actin filament depolymerization,actin filament binding,actin filament bundle assembly
WWP2	GIYK01025232	Ssa#XM_014124324.1	ssa-miR-novel-16-5p	NEDD4-like E3 ubiquitin-protein ligase WWP2 isoform X1	protein ubiquitination,ubiquitin-dependent protein catabolic process,ligase activity,protein binding,ubiquitin protein ligase activity
WWP2	GIYK01025235,GIYK01025240,GIYK01025243,GIYK01025237,GIYK01025236,GIYK01025233,GIYK01025242,GIYK01025239,GIYK01025241,GIYK01025238	Ssa#XM_014124324.1,Ssa#XM_014124324.1,Ssa#XM_014124324.1,Ssa#XM_014124324.1,Ssa#XM_014124324.1,Ssa#XM_014124324.1,Ssa#XM_014124324.1,Ssa#XM_014124324.1,Ssa#XM_014124324.1,Ssa#XM_014124324.1	ssa-miR-novel-16-5p	NEDD4-like E3 ubiquitin-protein ligase WWP2 isoform X1,NEDD4-like E3 ubiquitin-protein ligase WWP2 isoform X2,NEDD4-like E3 ubiquitin-protein ligase WWP2 isoform X4	protein ubiquitination,ubiquitin-dependent protein catabolic process,ligase activity,protein binding,ubiquitin-protein transferase activity,ubiquitin protein ligase activity
wrap73	GIYK01039013	Ssa#XM_014146168.1	ssa-miR-30a-1-2-5p,ssa-miR-15e-5p,ssa-miR-30a-3-4-5p,ssa-miR-15d-5p,ssa-miR-30e-5p,ssa-miR-457ab-5p	WD repeat-containing protein WRAP73	protein binding
wipi1	GIYK01059582,GIYK01059581	Ssa#XM_014179780.1,Ssa#XM_014179780.1	ssa-miR-15e-5p,ssa-miR-15d-5p,ssa-let-7e-5p,ssa-miR-457ab-5p,ssa-miR-216c-3p	WD repeat domain phosphoinositide-interacting protein 1-like	protein binding,autophagy,phosphatidylinositol-3-phosphate binding
WFIKKN2	GIYK01006004	Ssa#XM_014177743.1	ssa-miR-101b-3p,ssa-miR-101a-3p,ssa-miR-18bc-5p	WAP, Kazal, immunoglobulin, Kunitz and NTR domain-containing protein-like	serine-type endopeptidase inhibitor activity,protein binding,negative regulation of endopeptidase activity,extracellular region
WDR82	GIYK01051386	Ssa#XM_014178970.1	ssa-miR-15a-3p	WD repeat-containing protein 82 isoform X2	protein binding,Set1C/COMPASS complex
WDR73	GIYK01010458	Ssa#XM_014196298.1	ssa-miR-15e-3p,ssa-let-7b-3p,ssa-miR-125b-1-3p,ssa-let-7j-3p	WD repeat-containing protein 73-like	protein binding
wdr60	GIYK01060164,GIYK01060163,GIYK01060166,GIYK01060162,GIYK01060167,GIYK01060165	Ssa#XM_014180643.1,Ssa#XM_014180643.1,Ssa#XM_014180643.1,Ssa#XM_014180643.1,Ssa#XM_014180643.1,Ssa#XM_014180643.1	ssa-miR-1-3p,ssa-miR-214-1-2-3p,ssa-miR-206-3p	WD repeat-containing protein 60 isoform X2,WD repeat-containing protein 60 isoform X3	protein binding
wdr55	GIYK01028509,GIYK01028508,GIYK01028507	Ssa#XM_014129346.1,Ssa#XM_014129346.1,Ssa#XM_014129346.1	ssa-miR-novel-13-5p,ssa-miR-122-2-3p	WD repeat-containing protein 55 isoform X3,WD repeat-containing protein 55 isoform X1	protein binding,nucleolus,rRNA processing
WDR45	GIYK01027642,GIYK01027643,GIYK01027641	Ssa#XM_014128289.1,Ssa#XM_014128289.1,Ssa#XM_014128289.1	ssa-let-7b-3p,ssa-let-7j-3p	WD repeat domain phosphoinositide-interacting protein 4	protein binding,autophagy
WDR1	GIYK01029895,GIYK01029894	Ssa#XM_014132057.1,Ssa#XM_014132057.1	ssa-miR-15e-5p,ssa-miR-206-3p,ssa-miR-146b-5p,ssa-miR-15d-5p,ssa-miR-146d-5p,ssa-miR-457ab-5p,ssa-miR-novel-16-5p,ssa-miR-146a-5p,ssa-miR-novel-12-5p,ssa-miR-122-2-3p	WD repeat-containing protein 1-like	protein binding
WDFY2	GIYK01056098	Ssa#XM_014173877.1	ssa-miR-15e-5p,ssa-miR-1-3p,ssa-miR-153a-3p,ssa-miR-218a-5p,ssa-miR-101a-3p,ssa-miR-222b-3p,ssa-miR-93a-5p,ssa-miR-15d-5p,ssa-miR-457ab-5p,ssa-miR-novel-16-5p,ssa-miR-206-3p,ssa-miR-8163-5p,ssa-miR-216c-3p,ssa-miR-19a-2-3p,ssa-miR-214-3-3p	WD repeat and FYVE domain-containing protein 2 isoform X4	protein binding
WDFY2	GIYK01056099,GIYK01056097	Ssa#XM_014173877.1,Ssa#XM_014173877.1	ssa-miR-15e-5p,ssa-miR-222b-3p,ssa-miR-101a-3p,ssa-miR-93a-5p,ssa-miR-15d-5p,ssa-miR-457ab-5p,ssa-miR-novel-16-5p,ssa-miR-216c-3p,ssa-miR-19a-2-3p,ssa-miR-214-3-3p	WD repeat and FYVE domain-containing protein 2-like	protein binding,metal ion binding
WASL	GIYK01043459,GIYK01043462,GIYK01043465,GIYK01043461,GIYK01043460,GIYK01043466,GIYK01043463	Ssa#XM_014153001.1,Ssa#XM_014153001.1,Ssa#XM_014153001.1,Ssa#XM_014153001.1,Ssa#XM_014153001.1,Ssa#XM_014153001.1,Ssa#XM_014153001.1	ssa-miR-19a-2-3p	neural Wiskott-Aldrich syndrome protein-like isoform X1,neural Wiskott-Aldrich syndrome protein-like isoform X2,neural Wiskott-Aldrich syndrome protein-like	actin binding,positive regulation of Arp2/3 complex-mediated actin nucleation
WASL	GIYK01043464	Ssa#XM_014153001.1	ssa-miR-19a-2-3p	neural Wiskott-Aldrich syndrome protein-like	actin binding,positive regulation of Arp2/3 complex-mediated actin nucleation
wars	GIYK01000130,GIYK01000129	Ssa#XM_014123475.1,Ssa#XM_014123475.1	ssa-miR-301a-5p,ssa-miR-novel-16-5p,ssa-miR-200b-3p	tryptophan--tRNA ligase, cytoplasmic	ATP binding,tryptophan-tRNA ligase activity,tryptophanyl-tRNA aminoacylation
wars	GIYK01000131	Ssa#XM_014123475.1	ssa-miR-301a-5p,ssa-miR-novel-16-5p,ssa-miR-200b-3p		aminoacyl-tRNA ligase activity,ATP binding,tRNA aminoacylation for protein translation
WAPL	GIYK01046571	Ssa#XM_014158353.1	ssa-miR-214-3-3p,ssa-miR-218a-5p,ssa-miR-146b-5p,ssa-miR-146a-5p	wings apart-like protein homolog
WAPL	GIYK01059168,GIYK01059167	Ssa#XM_014158353.1,Ssa#XM_014158353.1	ssa-miR-222a-5p,ssa-miR-214-3-3p,ssa-miR-214-1-2-3p,ssa-miR-200b-3p	wings apart-like protein homolog isoform X1
VWA7	GIYK01019325,GIYK01019331,GIYK01019330	Ssa#XM_014209910.1,Ssa#XM_014209910.1,Ssa#XM_014209910.1	ssa-miR-15d-5p,ssa-miR-15e-5p,ssa-let-7e-5p,ssa-miR-214-1-2-3p	von Willebrand factor A domain-containing protein 7-like	integral component of membrane
VWA7	GIYK01019329	Ssa#XM_014209910.1	ssa-let-7e-5p,ssa-miR-214-1-2-3p	von Willebrand factor A domain-containing protein 7-like
VWA1	GIYK01030738,GIYK01030737	Ssa#XM_014132974.1,Ssa#XM_014132974.1	ssa-miR-novel-2-5p	von Willebrand factor A domain-containing protein 1-like	protein binding,regulation of cyclin-dependent protein serine/threonine kinase activity,regulation of transcription by RNA polymerase II,cyclin-dependent protein serine/threonine kinase regulator activity,host cell nucleus
VTCN1	GIYK01060862,GIYK01060865,GIYK01060864	Ssa#XM_014146734.1,Ssa#XM_014146734.1,Ssa#XM_014146734.1	ssa-miR-218a-5p,ssa-miR-novel-13-5p,ssa-miR-18bc-5p,ssa-miR-novel-16-5p,ssa-miR-8163-5p	V-set domain-containing T-cell activation inhibitor 1-like,PREDICTED: uncharacterized protein LOC106596459	integral component of membrane
VPS52	GIYK01058019,GIYK01058020	Ssa#XM_014177300.1,Ssa#XM_014177300.1	ssa-miR-8163-5p,ssa-miR-205b-5p,ssa-miR-222a-5p	vacuolar protein sorting-associated protein 52 homolog
VPS4B	GIYK01035521	Ssa#XM_014140277.1	ssa-miR-15e-5p,ssa-miR-222a-5p,ssa-miR-15d-5p,ssa-miR-457ab-5p,ssa-miR-19a-2-3p	vacuolar protein sorting-associated protein 4B isoform X1	ATP binding
VPS4B	GIYK01035525,GIYK01035523,GIYK01035524,GIYK01035526,GIYK01035528,GIYK01035529,GIYK01035522,GIYK01035527	Ssa#XM_014140277.1,Ssa#XM_014140277.1,Ssa#XM_014140277.1,Ssa#XM_014140277.1,Ssa#XM_014140277.1,Ssa#XM_014140277.1,Ssa#XM_014140277.1,Ssa#XM_014140277.1	ssa-miR-15e-5p,ssa-miR-222a-5p,ssa-miR-15d-5p,ssa-miR-18bc-5p,ssa-miR-457ab-5p,ssa-miR-19a-2-3p	vacuolar protein sorting-associated protein 4B-like isoform X2	ATP binding
VPS4A	GIYK01025249,GIYK01025248,GIYK01025251,GIYK01025250,GIYK01025253,GIYK01025252	Ssa#XM_014124312.1,Ssa#XM_014124312.1,Ssa#XM_014124312.1,Ssa#XM_014124312.1,Ssa#XM_014124312.1,Ssa#XM_014124312.1	ssa-miR-222b-3p,ssa-miR-17-5p,ssa-miR-106a-5p,ssa-miR-106b-5p,ssa-miR-93a-5p,ssa-miR-221-3p,ssa-miR-20a-5p	vacuolar protein sorting-associated protein 4A,vacuolar protein sorting-associated protein 4A-like isoform X3	ATP binding
vps45	GIYK01036813,GIYK01036814	Ssa#NM_001140402.1,Ssa#NM_001140402.1	ssa-miR-203b-3p,ssa-miR-1-3p,ssa-miR-206-3p	vacuolar protein sorting-associated protein 45-like	regulation of lens fiber cell differentiation,vesicle docking involved in exocytosis
VPS26C	GIYK01033748	Ssa#NM_001140632.1	ssa-miR-222b-3p,ssa-miR-221-3p,ssa-miR-1-3p,ssa-miR-206-3p	Down syndrome critical region protein 3 isoform X1	endosome,intracellular protein transport
VPS26B	GIYK01049602	Ssa#NM_001141660.1	ssa-miR-1-3p,ssa-miR-218a-5p,ssa-miR-206-3p	vacuolar protein sorting-associated protein 26B-like	intracellular protein transport
vp37b	GIYK01048722,GIYK01048723	Ssa#NM_001173684.1,Ssa#NM_001173684.1	ssa-miR-15e-5p,ssa-miR-146b-5p,ssa-miR-205b-5p,ssa-miR-222a-5p,ssa-miR-15d-5p,ssa-miR-146d-5p,ssa-miR-457ab-5p,ssa-miR-146a-5p,ssa-miR-301a-5p,ssa-miR-214-3-3p	vacuolar protein sorting-associated protein 37B-like	endosome transport via multivesicular body sorting pathway,protein transport,ESCRT I complex
vp37a	GIYK01062238,GIYK01062236,GIYK01062239	Ssa#NM_001140227.1,Ssa#NM_001140227.1,Ssa#NM_001140227.1	ssa-miR-101b-3p,ssa-miR-15e-5p,ssa-miR-222a-5p,ssa-miR-15d-5p,ssa-let-7e-5p,ssa-miR-457ab-5p	vacuolar protein sorting-associated protein 37A isoform X1	locomotory behavior,endosome transport via multivesicular body sorting pathway,protein transport,ESCRT I complex
VMP1	GIYK01010988	Ssa#XM_014197319.1	ssa-miR-30a-1-2-5p,ssa-miR-30a-3-4-5p,ssa-miR-30e-5p	Vacuole membrane protein 1
VGLL4	GIYK01032179,GIYK01032178	Ssa#XM_014135116.1,Ssa#XM_014135116.1	ssa-miR-15e-5p,ssa-miR-15d-5p,ssa-miR-221-3p,ssa-miR-457ab-5p,ssa-miR-214-1-2-3p,ssa-miR-novel-16-5p,ssa-miR-206-3p,ssa-miR-216c-3p,ssa-miR-19a-2-3p	transcription cofactor vestigial-like protein 4 isoform X1	regulation of transcription DNA-templated
VEZF1	GIYK01010643	Ssa#XM_014196736.1	ssa-miR-205b-5p	vascular endothelial zinc finger 1-like isoform X3
VEZF1	GIYK01049771,GIYK01049769,GIYK01049772,GIYK01049770,GIYK01049773,GIYK01049774	Ssa#XM_014163203.1,Ssa#XM_014163203.1,Ssa#XM_014163203.1,Ssa#XM_014163203.1,Ssa#XM_014163203.1,Ssa#XM_014163203.1	ssa-miR-8163-5p,ssa-miR-novel-16-5p,ssa-miR-novel-13-5p	vascular endothelial zinc finger 1-like isoform X4,vascular endothelial zinc finger 1-like isoform X1	nucleic acid binding,
VEGFA	GIYK01016655,GIYK01016654	Ssa#XM_014205378.1,Ssa#XM_014205378.1	ssa-miR-15e-5p,ssa-miR-17-5p,ssa-miR-93a-5p,ssa-miR-15d-5p,ssa-miR-457ab-5p,ssa-miR-novel-16-5p,ssa-miR-20a-5p,ssa-miR-200b-3p	vascular endothelial growth factor A-A-like isoform X1	growth factor activity,membrane,signal transduction,heparin binding
VDAC2	GIYK01002635	Ssa#XM_014138449.1	ssa-miR-101b-3p,ssa-miR-15e-5p,ssa-miR-101a-3p,ssa-miR-200b-3p,ssa-miR-214-3-3p	voltage-dependent anion-selective channel protein 2-like isoform X2	inorganic anion transport,voltage-gated anion channel activity,mitochondrial outer membrane,regulation of cilium assembly,anion transmembrane transport
VDAC2	GIYK01034493,GIYK01034494,GIYK01034492,GIYK01034495	Ssa#XM_014138449.1,Ssa#XM_014138449.1,Ssa#XM_014138449.1,Ssa#XM_014138449.1	ssa-miR-222b-3p,ssa-miR-200b-3p,ssa-miR-214-1-2-3p,ssa-miR-8163-5p,ssa-miR-214-3-3p	voltage-dependent anion-selective channel protein 2-like isoform X2	inorganic anion transport,voltage-gated anion channel activity,mitochondrial outer membrane,regulation of cilium assembly,anion transmembrane transport
VDAC2	GIYK01048581,GIYK01048580	Ssa#XM_014161400.1,Ssa#XM_014161400.1	ssa-miR-101a-3p,ssa-miR-18bc-5p	voltage-dependent anion-selective channel protein 2-like isoform X1,voltage-dependent anion-selective channel protein 2-like isoform X3	fin regeneration,inorganic anion transport,voltage-gated anion channel activity,mitochondrial outer membrane,regulation of cilium assembly,anion transmembrane transport
VDAC1	GIYK01011511	Ssa#XM_014197981.1	ssa-miR-146b-5p,ssa-miR-146a-5p,ssa-miR-146d-5p,ssa-miR-206-3p,ssa-miR-200b-3p	hypothetical protein FQN60_000495	integral component of membrane,inorganic anion transport,voltage-gated anion channel activity,mitochondrial outer membrane,anion transmembrane transport
VDAC1	GIYK01011512,GIYK01011510,GIYK01011513	Ssa#XM_014197981.1,Ssa#XM_014197981.1,Ssa#XM_014197981.1	ssa-miR-146b-5p,ssa-miR-146a-5p,ssa-miR-146d-5p,ssa-miR-206-3p,ssa-miR-200b-3p	voltage-dependent anion-selective channel protein 1	integral component of membrane,inorganic anion transport,voltage-gated anion channel activity,mitochondrial outer membrane,anion transmembrane transport
VCP	GIYK01054449,GIYK01054445,GIYK01054446	Ssa#XM_014161390.1,Ssa#XM_014161390.1,Ssa#XM_014161390.1	ssa-miR-221-3p,ssa-miR-222b-3p	transitional endoplasmic reticulum ATPase	ATP binding,chordate embryonic development,locomotory behavior,regulation of proteasomal ubiquitin-dependent protein catabolic process,hydrolase activity,regulation of autophagy
VCP	GIYK01054447	Ssa#XM_014161390.1	ssa-miR-221-3p,ssa-miR-222b-3p	transitional endoplasmic reticulum ATPase	cytosol,nucleus,mitotic spindle disassembly,ubiquitin-dependent ERAD pathway,ER-associated misfolded protein catabolic process,ATP binding,chordate embryonic development,locomotory behavior,ATPase activity,retrograde protein transport ER to cytosol,regulation of proteasomal ubiquitin-dependent protein catabolic process,polyubiquitin modification-dependent protein binding,autophagosome maturation,…
VCP	GIYK01054448,GIYK01054450	Ssa#XM_014161390.1,Ssa#XM_014161390.1	ssa-miR-221-3p,ssa-miR-222b-3p	transitional endoplasmic reticulum ATPase	ATP binding,chordate embryonic development,locomotory behavior,regulation of proteasomal ubiquitin-dependent protein catabolic process,hydrolase activity,regulation of autophagy
VCP	GIYK01054451	Ssa#XM_014161390.1	ssa-miR-221-3p,ssa-miR-222b-3p	transitional endoplasmic reticulum ATPase	ATP binding
VCAM1	GIYK01065517	Ssa#XM_014130100.1	ssa-let-7e-5p	vascular cell adhesion protein 1-like	integral component of membrane
VCAM1	GIYK01015237,GIYK01008597	Ssa#XM_014191592.1,Ssa#XM_014191592.1	ssa-miR-101b-3p,ssa-miR-101a-3p,ssa-miR-17-5p,ssa-miR-106a-5p,ssa-miR-106b-5p,ssa-miR-93a-5p,ssa-miR-205b-5p,ssa-miR-221-3p,ssa-miR-214-1-2-3p,ssa-miR-20a-5p	vascular cell adhesion protein 1-like	integral component of membrane,cell-cell adhesion
VCAM1	GIYK01015256	Ssa#XM_014191592.1	ssa-miR-30a-1-2-5p,ssa-miR-218a-5p,ssa-miR-206-3p	vascular cell adhesion protein 1-like	cell-cell adhesion,membrane
VATL	GIYK01046967,GIYK01007657,GIYK01045814,GIYK01046966	Ssa#XM_014158859.1,Ssa#XM_014192208.1,Ssa#XM_014156968.1,Ssa#XM_014158859.1	ssa-miR-101a-3p,ssa-miR-200b-3p,ssa-miR-457ab-5p,ssa-miR-122-2-3p,ssa-miR-214-3-3p	V-type proton ATPase 16 kDa proteolipid subunit	integral component of membrane,response to yeast,vacuolar membrane,proton transmembrane transporter activity,notochord cell vacuolation,embryonic retina morphogenesis in camera-type eye,proton transmembrane transport,proton-transporting V-type ATPase V0 domain
VATH	GIYK01064683,GIYK01064684	Ssa#XM_014187323.1,Ssa#XM_014187323.1	ssa-miR-106b-5p,ssa-miR-93a-5p,ssa-miR-17-5p	V-type proton ATPase subunit H isoform X1	vacuolar proton-transporting V-type ATPase V1 domain,eye pigmentation,positive regulation of neural retina development,bone development,proton transmembrane transport,bone mineralization,proton-transporting ATPase activity rotational mechanism
VATH	GIYK01064685	Ssa#XM_014187323.1	ssa-miR-106b-5p,ssa-miR-93a-5p,ssa-miR-17-5p	V-type proton ATPase subunit H isoform X2	vacuolar proton-transporting V-type ATPase V1 domain,proton-transporting ATPase activity rotational mechanism,proton transmembrane transport
VATH	GIYK01063992	Ssa#NM_001140003.1	ssa-miR-101b-3p,ssa-miR-101a-3p	V-type proton ATPase subunit H isoform X1	vacuolar proton-transporting V-type ATPase V1 domain,eye pigmentation,positive regulation of neural retina development,bone development,proton transmembrane transport,bone mineralization,proton-transporting ATPase activity rotational mechanism
VATH	GIYK01017072,GIYK01017073	Ssa#XM_014145009.1,Ssa#XM_014145009.1	ssa-miR-15e-5p,ssa-miR-1-3p,ssa-miR-15d-5p,ssa-miR-457ab-5p,ssa-miR-206-3p,ssa-miR-8163-5p,ssa-miR-214-3-3p	V-type proton ATPase subunit D	proton-transporting V-type ATPase complex,proton-transporting ATPase activity rotational mechanism,proton transmembrane transport
VATA	GIYK01028473,GIYK01028472,GIYK01028474	Ssa#XM_014129311.1,Ssa#XM_014129311.1,Ssa#XM_014129311.1	ssa-miR-206-3p,ssa-miR-18bc-5p	V-type proton ATPase catalytic subunit A,Vacuolar ATP synthase catalytic subunit A	apical plasma membrane,ATP binding,ATP metabolic process,proton-transporting V-type ATPase V1 domain,proton transmembrane transport,proton-transporting ATPase activity rotational mechanism
VAPB	GIYK01038851	Ssa#XM_014145579.1	ssa-miR-146b-5p,ssa-miR-146a-5p	vesicle-associated membrane protein-associated protein B-like isoform X1	endoplasmic reticulum membrane,integral component of membrane,Golgi apparatus,cellular calcium ion homeostasis,endoplasmic reticulum unfolded protein response
VAMP8	GIYK01048717,GIYK01054240	Ssa#XM_014161668.1,Ssa#XM_014161668.1	ssa-miR-101b-3p,ssa-miR-101a-3p,ssa-miR-200b-3p,ssa-miR-novel-13-5p,ssa-miR-214-1-2-3p,ssa-miR-216c-3p,ssa-miR-novel-16-3p,ssa-miR-214-3-3p	vesicle-associated membrane protein 8-like,Vesicle-associated membrane protein 8	integral component of membrane,vesicle-mediated transport
VAMP8	GIYK01048718,GIYK01048719	Ssa#XM_014161668.1,Ssa#XM_014161668.1	ssa-miR-216c-3p,ssa-miR-218a-5p,ssa-miR-novel-13-5p		integral component of membrane,vesicle-mediated transport
vamp5	GIYK01003230,GIYK01003231	Ssa#S35547861,Ssa#S35547861	ssa-miR-153a-3p,ssa-miR-novel-16-5p	vesicle-associated membrane protein 5-like	integral component of membrane,vesicle-mediated transport
vamp2	GIYK01010584	Ssa#XM_014196529.1	ssa-miR-1-3p,ssa-miR-218a-5p,ssa-miR-17-5p,ssa-miR-106a-5p,ssa-miR-106b-5p,ssa-miR-93a-5p,ssa-miR-novel-13-5p,ssa-miR-18bc-5p,ssa-let-7e-5p,ssa-miR-novel-16-5p,ssa-miR-20a-5p,ssa-miR-19a-2-3p	vesicle-associated membrane protein 2	integral component of membrane,vesicle-mediated transport
va0e2	GIYK01028953,GIYK01028954	Ssa#NM_001146601.1,Ssa#NM_001146601.1	ssa-miR-15e-5p,ssa-miR-1-3p,ssa-miR-206-3p,ssa-miR-146b-5p,ssa-miR-15d-5p,ssa-miR-146d-5p,ssa-miR-457ab-5p,ssa-miR-146a-5p,ssa-miR-8163-5p,ssa-miR-200b-3p	V-type proton ATPase subunit e 2-like	integral component of membrane,proton transmembrane transporter activity,hydrolase activity,proton transmembrane transport,proton-transporting V-type ATPase V0 domain
UTP4	GIYK01040806,GIYK01040805	Ssa#XM_014148976.1,Ssa#XM_014148976.1	ssa-miR-222a-5p,ssa-miR-novel-16-5p,ssa-miR-214-3-3p	U3 small nucleolar RNA-associated protein 4 homolog	hepaticobiliary system process,protein binding
utp20	GIYK01018089	Ssa#XM_014207648.1	ssa-miR-30a-1-2-5p,ssa-miR-30a-3-4-5p,ssa-miR-30e-5p
utp15	GIYK01055424,GIYK01055423	Ssa#NM_001140178.1,Ssa#NM_001140178.1	ssa-miR-200b-3p,ssa-miR-205b-5p,ssa-miR-462b-5p,ssa-miR-214-1-2-3p,ssa-miR-301a-5p,ssa-miR-122-2-3p,ssa-miR-novel-16-3p,ssa-miR-214-3-3p		protein binding
utp15	GIYK01055422	Ssa#NM_001140178.1	ssa-miR-101b-3p,ssa-miR-15e-5p,ssa-miR-101a-3p,ssa-miR-15d-5p,ssa-miR-462b-5p,ssa-miR-457ab-5p,ssa-miR-214-1-2-3p,ssa-miR-214-3-3p,ssa-miR-200b-3p	U3 small nucleolar RNA-associated protein 15 homolog	protein binding,nucleolus,rRNA processing,positive regulation of angiogenesis
USP6NL	GIYK01043620,GIYK01043622,GIYK01043623,GIYK01043621	Ssa#XM_014153221.1,Ssa#XM_014153221.1,Ssa#XM_014153221.1,Ssa#XM_014153221.1	ssa-miR-30a-1-2-5p,ssa-miR-30a-3-4-5p,ssa-miR-30e-5p,ssa-miR-216c-3p,ssa-miR-200b-3p	USP6 N-terminal-like protein isoform X1,USP6 N-terminal-like protein isoform X3
USP6	GIYK01034315	Ssa#XM_014138114.1	ssa-let-7e-5p	ubiquitin carboxyl-terminal hydrolase 32-like isoform X1	ubiquitin-dependent protein catabolic process,protein deubiquitination,calcium ion binding,thiol-dependent ubiquitin-specific protease activity
USP47	GIYK01026813,GIYK01026816,GIYK01026814,GIYK01026812,GIYK01026810,GIYK01026811,GIYK01026815	Ssa#XM_014175288.1,Ssa#XM_014175288.1,Ssa#XM_014175288.1,Ssa#XM_014175288.1,Ssa#XM_014175288.1,Ssa#XM_014175288.1,Ssa#XM_014175288.1	ssa-miR-101b-3p,ssa-miR-15e-5p,ssa-miR-101a-3p,ssa-miR-novel-13-5p,ssa-miR-15d-5p,ssa-miR-203b-3p,ssa-miR-457ab-5p,ssa-miR-214-1-2-3p	ubiquitin carboxyl-terminal hydrolase 47-like isoform X5,ubiquitin carboxyl-terminal hydrolase 47-like isoform X7,ubiquitin carboxyl-terminal hydrolase 47-like isoform X6	ubiquitin-dependent protein catabolic process,thiol-dependent ubiquitinyl hydrolase activity,protein binding,protein deubiquitination
USP47	GIYK01056995,GIYK01056991,GIYK01056994,GIYK01056993,GIYK01056992	Ssa#XM_014175288.1,Ssa#XM_014175288.1,Ssa#XM_014175288.1,Ssa#XM_014175288.1,Ssa#XM_014175288.1	ssa-miR-101b-3p,ssa-miR-15e-5p,ssa-miR-101a-3p,ssa-miR-15d-5p,ssa-miR-457ab-5p,ssa-miR-214-1-2-3p,ssa-miR-214-3-3p	ubiquitin carboxyl-terminal hydrolase 47-like isoform X1,ubiquitin carboxyl-terminal hydrolase 47-like isoform X6	ubiquitin-dependent protein catabolic process,thiol-dependent ubiquitinyl hydrolase activity,protein binding,protein deubiquitination
USP39	GIYK01054544	Ssa#XM_014171295.1	ssa-let-7b-3p,ssa-let-7j-3p	U4/U6.U5 tri-snRNP-associated protein 2	adenohypophysis morphogenesis,thiol-dependent ubiquitinyl hydrolase activity,zinc ion binding,spliceosomal complex assembly,protein deubiquitination,cranial skeletal system development,regulation of RNA splicing
USP22	GIYK01046647	Ssa#XM_014184349.1	ssa-miR-200b-3p	ubiquitin carboxyl-terminal hydrolase 22 isoform X1	thiol-dependent ubiquitinyl hydrolase activity,ubiquitin-dependent protein catabolic process,protein deubiquitination,zinc ion binding
USP22	GIYK01064979	Ssa#XM_014184349.1	ssa-miR-146b-5p,ssa-miR-222a-5p,ssa-miR-214-1-2-3p,ssa-miR-146a-5p,ssa-miR-214-3-3p	ubiquitin carboxyl-terminal hydrolase 22 isoform X1	ubiquitin-dependent protein catabolic process,thiol-dependent ubiquitin-specific protease activity,cysteine-type peptidase activity,protein deubiquitination,zinc ion binding
USP22	GIYK01064980	Ssa#XM_014184349.1	ssa-miR-146b-5p,ssa-miR-222a-5p,ssa-miR-214-1-2-3p,ssa-miR-146a-5p,ssa-miR-214-3-3p	ubiquitin carboxyl-terminal hydrolase 22 isoform X2	ubiquitin-dependent protein catabolic process,thiol-dependent ubiquitin-specific protease activity,cysteine-type peptidase activity,protein deubiquitination,zinc ion binding
usp16	GIYK01049930	Ssa#XM_014163667.1	ssa-miR-203b-3p,ssa-miR-301a-5p,ssa-miR-200b-3p	ubiquitin carboxyl-terminal hydrolase 16	thiol-dependent ubiquitinyl hydrolase activity,ubiquitin-dependent protein catabolic process,protein deubiquitination,zinc ion binding
usp16	GIYK01049929,GIYK01049931,GIYK01049928	Ssa#XM_014163667.1,Ssa#XM_014163667.1,Ssa#XM_014163667.1	ssa-miR-203b-3p,ssa-miR-200b-3p	ubiquitin carboxyl-terminal hydrolase 16	regulation of biological process,ubiquitin-dependent protein catabolic process,cell cycle,thiol-dependent ubiquitinyl hydrolase activity,protein deubiquitination,organelle organization,zinc ion binding
USP14	GIYK01007275	Ssa#XM_014191788.1	ssa-miR-novel-16-3p,ssa-miR-novel-13-5p	ubiquitin carboxyl-terminal hydrolase 14-like isoform X2	thiol-dependent ubiquitinyl hydrolase activity,ubiquitin-dependent protein catabolic process,protein deubiquitination
USP14	GIYK01007276	Ssa#XM_014191788.1	ssa-miR-novel-16-3p,ssa-miR-novel-13-5p	ubiquitin carboxyl-terminal hydrolase 14-like isoform X1	ubiquitin-dependent protein catabolic process,thiol-dependent ubiquitinyl hydrolase activity,protein binding,protein deubiquitination
usp1	GIYK01024456	Ssa#XM_014123456.1	ssa-miR-18bc-5p,ssa-miR-214-1-2-3p,ssa-miR-8163-5p,ssa-miR-19a-2-3p,ssa-miR-214-3-3p	ubiquitin carboxyl-terminal hydrolase 1	ubiquitin-dependent protein catabolic process,cysteine-type endopeptidase activity,regulation of DNA repair,thiol-dependent ubiquitinyl hydrolase activity,protein deubiquitination
UROD	GIYK01007061,GIYK01035432,GIYK01035435,GIYK01007062,GIYK01035433	Ssa#NM_001140242.1,Ssa#XM_014181732.1,Ssa#XM_014181732.1,Ssa#NM_001140242.1,Ssa#XM_014181732.1	ssa-miR-18bc-5p,ssa-miR-8163-5p,ssa-miR-216c-3p,ssa-miR-novel-16-3p,ssa-miR-19a-2-3p,ssa-miR-200b-3p	Uroporphyrinogen decarboxylase,uroporphyrinogen decarboxylase	uroporphyrinogen decarboxylase activity,protoporphyrinogen IX biosynthetic process
UROD	GIYK01007064	Ssa#NM_001140242.1	ssa-miR-15a-3p,ssa-miR-455-3p,ssa-miR-novel-10-3p	uroporphyrinogen decarboxylase isoform X2	uroporphyrinogen decarboxylase activity,porphyrin-containing compound biosynthetic process
UROC1	GIYK01051973	Ssa#XM_014201118.1	ssa-miR-8163-5p	urocanate hydratase	urocanate hydratase activity
urb2	GIYK01059698	Ssa#XM_014179901.1	ssa-miR-101a-3p	unhealthy ribosome biogenesis protein 2 homolog	regulation of hematopoietic stem cell differentiation,ribosome biogenesis,nucleolus
urad	GIYK01047283	Ssa#XM_014159452.1	ssa-miR-101b-3p,ssa-miR-214-1-2-3p,ssa-miR-101a-3p	putative 2-oxo-4-hydroxy-4-carboxy-5-ureidoimidazoline decarboxylase	allantoin biosynthetic process,2-oxo-4-hydroxy-4-carboxy-5-ureidoimidazoline decarboxylase activity
UPP2	GIYK01055576	Ssa#XM_014173114.1	ssa-miR-216c-3p,ssa-miR-206-3p	uridine phosphorylase 2	nucleotide catabolic process,cytoplasm,UMP salvage,nucleoside metabolic process,uridine phosphorylase activity
UPP1	GIYK01066280,GIYK01066284	Ssa#XM_014125394.1,Ssa#XM_014125394.1	ssa-miR-101b-3p,ssa-let-7e-5p,ssa-miR-101a-3p	uridine phosphorylase 1-like	nucleotide catabolic process,cytoplasm,UMP salvage,nucleoside metabolic process,uridine phosphorylase activity
UPP1	GIYK01066281	Ssa#XM_014125394.1	ssa-miR-101b-3p,ssa-let-7e-5p,ssa-miR-101a-3p	uridine phosphorylase 1-like	nucleotide catabolic process,cytoplasm,UMP salvage,nucleoside metabolic process,uridine phosphorylase activity
UPP1	GIYK01066283	Ssa#XM_014125394.1	ssa-miR-101b-3p,ssa-let-7e-5p,ssa-miR-101a-3p	uridine phosphorylase 1-like	nucleotide catabolic process,cytoplasm,UMP salvage,nucleoside metabolic process,uridine phosphorylase activity
UPK1A	GIYK01013699	Ssa#XM_014169557.1	ssa-miR-novel-16-3p	uroplakin-1a-like	integral component of membrane
UPF1	GIYK01035124	Ssa#XM_014139806.1	ssa-miR-216c-3p,ssa-miR-462b-5p	regulator of nonsense transcripts 1 isoform X1	ATP binding,nuclear-transcribed mRNA catabolic process nonsense-mediated decay,cytoplasm,DNA binding,helicase activity,zinc ion binding
UNKL	GIYK01015481,GIYK01008343,GIYK01015483,GIYK01008344,GIYK01015482,GIYK01015480	Ssa#XM_014204256.1,Ssa#XM_014204256.1,Ssa#XM_014204256.1,Ssa#XM_014204256.1,Ssa#XM_014204256.1,Ssa#XM_014204256.1	ssa-miR-15e-5p,ssa-miR-222b-3p,ssa-miR-101a-3p,ssa-miR-17-5p,ssa-miR-106a-5p,ssa-miR-106b-5p,ssa-miR-216c-3p,ssa-miR-20a-5p,ssa-miR-novel-16-3p,ssa-miR-93a-5p,ssa-miR-30a-3-4-5p,ssa-miR-15d-5p,ssa-miR-301a-5p,ssa-miR-30a-1-2-5p,ssa-miR-novel-13-5p,ssa-miR-221-3p,ssa-miR-203b-3p,ssa-miR-457ab-5p,ssa-miR-206-3p,ssa-miR-214-3-3p	putative E3 ubiquitin-protein ligase UNKL isoform X1,putative E3 ubiquitin-protein ligase UNKL isoform X2,putative E3 ubiquitin-protein ligase UNKL isoform X3	metal ion binding
unc119b	GIYK01054803	Ssa#XM_014171767.1	ssa-miR-1-3p,ssa-miR-novel-16-3p,ssa-miR-214-1-2-3p,ssa-miR-206-3p	protein unc-119 homolog B	cilium assembly,nervous system development,Kupffer's vesicle development,lipid binding,lipoprotein transport,cilium
unc119b	GIYK01054804,GIYK01054802,GIYK01054805	Ssa#XM_014171767.1,Ssa#XM_014171767.1,Ssa#XM_014171767.1	ssa-miR-1-3p,ssa-miR-146b-5p,ssa-miR-146a-5p,ssa-miR-146d-5p,ssa-miR-214-1-2-3p,ssa-miR-206-3p,ssa-miR-novel-16-3p,ssa-miR-novel-12-5p	unc-119 homolog
ULK2	GIYK01022835,GIYK01022837,GIYK01022838	Ssa#XM_014214668.1,Ssa#XM_014214668.1,Ssa#XM_014214668.1	ssa-miR-218a-5p,ssa-miR-17-5p,ssa-miR-106a-5p,ssa-miR-106b-5p,ssa-miR-93a-5p,ssa-let-7e-5p,ssa-miR-214-1-2-3p,ssa-miR-20a-5p,ssa-miR-214-3-3p	serine/threonine-protein kinase ULK2-like isoform X1	protein serine/threonine kinase activity,ATP binding,regulation of dendrite morphogenesis,protein phosphorylation,habenula development,dendrite arborization
ULK2	GIYK01022836	Ssa#XM_014214668.1	ssa-miR-218a-5p,ssa-miR-17-5p,ssa-miR-106a-5p,ssa-miR-106b-5p,ssa-miR-93a-5p,ssa-let-7e-5p,ssa-miR-214-1-2-3p,ssa-miR-20a-5p,ssa-miR-214-3-3p	serine/threonine-protein kinase ULK2-like isoform X2	ATP binding,protein phosphorylation,protein serine/threonine kinase activity
UHRF1	GIYK01041434,GIYK01023170,GIYK01041433,GIYK01041432,GIYK01023172,GIYK01023171	Ssa#XM_014149640.1,Ssa#XM_014215846.1,Ssa#XM_014149640.1,Ssa#XM_014149640.1,Ssa#XM_014215846.1,Ssa#XM_014215846.1	ssa-miR-101b-3p,ssa-miR-1-3p,ssa-miR-222b-3p,ssa-miR-218a-5p,ssa-miR-101a-3p,ssa-miR-221-3p,ssa-let-7e-5p,ssa-miR-206-3p,ssa-miR-novel-16-3p,ssa-miR-214-3-3p	E3 ubiquitin-protein ligase UHRF1	animal organ regeneration,metal ion binding,inflammatory response,ligase activity,hypermethylation of CpG island,protein binding,lens development in camera-type eye,liver development,intestinal epithelial structure maintenance,maintenance of DNA methylation,nucleus
UHRF1	GIYK01041437	Ssa#XM_014149640.1	ssa-miR-218a-5p,ssa-miR-novel-16-3p,ssa-miR-214-3-3p		protein binding
UGT2A2	GIYK01047935	Ssa#XM_014160566.1	ssa-miR-146b-5p,ssa-miR-novel-1-3p,ssa-miR-146d-5p,ssa-miR-146a-5p,ssa-miR-novel-16-3p	UDP-glucuronosyltransferase 2A2-like isoform X2	glucuronosyltransferase activity,integral component of membrane
UGT1	GIYK01034115,GIYK01050483,GIYK01050234,GIYK01034116	Ssa#XM_014137634.1,Ssa#XM_014164527.1,Ssa#XM_014164110.1,Ssa#XM_014137634.1	ssa-miR-101b-3p,ssa-miR-101a-3p,ssa-miR-146b-5p,ssa-miR-novel-13-5p,ssa-miR-18bc-5p,ssa-miR-146d-5p,ssa-miR-301a-5p,ssa-miR-216c-3p,ssa-miR-novel-16-3p,ssa-miR-122-2-3p	UDP-glucuronosyltransferase-like isoform X3,UDP-glucuronosyltransferase-like isoform X1	glucuronosyltransferase activity,integral component of membrane
UGT1	GIYK01050235	Ssa#XM_014164110.1	ssa-miR-novel-13-5p,ssa-miR-146d-5p,ssa-miR-146b-5p,ssa-miR-122-2-3p		UDP-glycosyltransferase activity
UGT1	GIYK01050484,GIYK01050482	Ssa#XM_014164527.1,Ssa#XM_014164527.1	ssa-miR-216c-3p,ssa-miR-novel-16-3p,ssa-miR-18bc-5p	UDP-glucuronosyltransferase-like isoform X1	glucuronosyltransferase activity,integral component of membrane
UGT1	GIYK01045379,GIYK01045378,GIYK01045380	Ssa#XM_014156016.1,Ssa#XM_014156016.1,Ssa#XM_014156016.1	ssa-miR-106b-5p,ssa-miR-93a-5p,ssa-miR-20a-5p,ssa-miR-17-5p	UDP-glucuronosyltransferase 1-2 isoform X2	glucuronosyltransferase activity,integral component of membrane,intracellular membrane-bounded organelle
UGP2	GIYK01062449,GIYK01062450,GIYK01062451	Ssa#XM_014186518.1,Ssa#XM_014186518.1,Ssa#XM_014186518.1	ssa-miR-30a-1-2-5p,ssa-miR-216c-3p,ssa-miR-30e-5p	UTP--glucose-1-phosphate uridylyltransferase-like isoform X2	UDP-glucose metabolic process,cytoplasm,glycogen metabolic process,UTP:glucose-1-phosphate uridylyltransferase activity
UGP2	GIYK01062452	Ssa#XM_014186518.1	ssa-miR-216c-3p	UTP--glucose-1-phosphate uridylyltransferase-like isoform X1	UDP-glucose metabolic process,UTP:glucose-1-phosphate uridylyltransferase activity
ufc1	GIYK01028842	Ssa#NM_001146655.1	ssa-miR-15e-5p,ssa-miR-15d-5p,ssa-miR-457ab-5p,ssa-miR-8163-5p,ssa-miR-214-3-3p	ubiquitin-fold modifier-conjugating enzyme 1	protein K69-linked ufmylation,UFM1 conjugating enzyme activity
UCP2	GIYK01034174,GIYK01034182,GIYK01034166,GIYK01034172,GIYK01034173,GIYK01034179,GIYK01034186,GIYK01034184,GIYK01034170,GIYK01034185,GIYK01034183,GIYK01034188,GIYK01034178,GIYK01034168,GIYK01034167	Ssa#XM_014137588.1,Ssa#XM_014137588.1,Ssa#XM_014137588.1,Ssa#XM_014137588.1,Ssa#XM_014137588.1,Ssa#XM_014137588.1,Ssa#XM_014137588.1,Ssa#XM_014137588.1,Ssa#XM_014137588.1,Ssa#XM_014137588.1,Ssa#XM_014137588.1,Ssa#XM_014137588.1,Ssa#XM_014137588.1,Ssa#XM_014137588.1,Ssa#XM_014137588.1	ssa-miR-15e-5p,ssa-miR-15d-5p,ssa-miR-457ab-5p,ssa-miR-216c-3p,ssa-miR-novel-16-3p		mitochondrial transport,mitochondrial membrane,
UCP2	GIYK01034177	Ssa#XM_014137588.1	ssa-miR-15d-5p,ssa-miR-15e-5p,ssa-miR-457ab-5p	mitochondrial uncoupling protein 2-like	mitochondrial transport,integral component of membrane,mitochondrial membrane
UCP2	GIYK01034189	Ssa#XM_014137588.1	ssa-miR-15d-5p,ssa-miR-15e-5p,ssa-miR-457ab-5p	mitochondrial uncoupling protein 2 isoform X2	mitochondrial transport,integral component of membrane,mitochondrial membrane
UCP1	GIYK01019119,GIYK01019117,GIYK01019121,GIYK01019127,GIYK01019126	Ssa#XM_014178970.1,Ssa#XM_014209496.1,Ssa#XM_014178970.1,Ssa#XM_014209496.1,Ssa#XM_014209496.1	ssa-miR-93a-5p,ssa-miR-18bc-5p,ssa-miR-203b-3p,ssa-miR-457ab-5p,ssa-miR-214-3-3p	mitochondrial uncoupling protein 2-like	integral component of membrane,mitochondrial membrane,mitochondrion,proton transmembrane transport,cellular response to estrogen stimulus,mitochondrial transmembrane transport,oxidative phosphorylation uncoupler activity,cellular response to fatty acid
UCP1	GIYK01019128,GIYK01019123,GIYK01019129	Ssa#XM_014209496.1,Ssa#XM_014209496.1,Ssa#XM_014209496.1	ssa-miR-203b-3p,ssa-miR-457ab-5p,ssa-miR-200b-3p,ssa-miR-18bc-5p	hypothetical protein Z043_109322	mitochondrial transport,integral component of membrane,mitochondrial membrane
UCP1	GIYK01019130	Ssa#XM_014209496.1	ssa-miR-203b-3p,ssa-miR-457ab-5p	mitochondrial uncoupling protein 3-like	mitochondrial membrane,integral component of membrane,proton transmembrane transport,mitochondrial transmembrane transport,oxidative phosphorylation uncoupler activity,cellular response to fatty acid
UCP1	GIYK01019118,GIYK01019116	Ssa#XM_014178970.1,Ssa#XM_014178970.1	ssa-miR-203b-3p,ssa-miR-214-3-3p	unnamed protein product, partial	mitochondrial membrane,integral component of membrane,proton transmembrane transport,mitochondrial transmembrane transport,oxidative phosphorylation uncoupler activity,cellular response to fatty acid
UCP1	GIYK01019124,GIYK01062303,GIYK01019122,GIYK01019125	Ssa#XM_014178970.1,Ssa#XM_014209496.1,Ssa#XM_014178970.1,Ssa#XM_014178970.1	ssa-miR-203b-3p,ssa-miR-214-3-3p	Uncoupling protein 2,mitochondrial uncoupling protein 2-like	mitochondrial membrane,integral component of membrane,proton transmembrane transport,cellular response to estrogen stimulus,mitochondrial transmembrane transport,oxidative phosphorylation uncoupler activity,cellular response to fatty acid
UCP1	GIYK01019120	Ssa#XM_014178970.1	ssa-miR-93a-5p,ssa-miR-203b-3p,ssa-miR-214-3-3p,ssa-miR-18bc-5p	mitochondrial brown fat uncoupling protein 1	mitochondrial membrane,integral component of membrane,proton transmembrane transport,cellular response to estrogen stimulus,mitochondrial transmembrane transport,oxidative phosphorylation uncoupler activity,cellular response to fatty acid
uckl1	GIYK01031967,GIYK01031971,GIYK01031975,GIYK01031970,GIYK01031969,GIYK01031976,GIYK01031974	Ssa#XM_014134723.1,Ssa#XM_014134723.1,Ssa#XM_014134723.1,Ssa#XM_014134723.1,Ssa#XM_014134723.1,Ssa#XM_014134723.1,Ssa#XM_014134723.1	ssa-miR-15e-5p,ssa-miR-17-5p,ssa-miR-106a-5p,ssa-miR-106b-5p,ssa-miR-93a-5p,ssa-miR-205b-5p,ssa-miR-15d-5p,ssa-miR-457ab-5p,ssa-miR-novel-16-5p,ssa-miR-20a-5p,ssa-miR-214-3-3p	uridine-cytidine kinase-like 1 isoform X9,uridine-cytidine kinase-like 1 isoform X4,uridine-cytidine kinase-like 1 isoform X7	ATP binding,nucleoside metabolic process,kinase activity,uridine kinase activity
uckl1	GIYK01031972,GIYK01031966,GIYK01031968	Ssa#XM_014134723.1,Ssa#XM_014134723.1,Ssa#XM_014134723.1	ssa-miR-106a-5p,ssa-miR-93a-5p,ssa-miR-20a-5p,ssa-miR-17-5p	uridine-cytidine kinase-like 1 isoform X2,uridine-cytidine kinase-like 1 isoform X3	uridine kinase activity,ATP binding,phosphorylation,UMP salvage,nucleoside metabolic process,CTP salvage
uckl1	GIYK01031973	Ssa#XM_014134723.1	ssa-miR-106a-5p,ssa-miR-93a-5p,ssa-miR-20a-5p,ssa-miR-17-5p	uridine-cytidine kinase-like 1 isoform X2	uridine kinase activity,ATP binding,phosphorylation,UMP salvage,nucleoside metabolic process,CTP salvage
UCHL5	GIYK01024220,GIYK01024221	Ssa#XM_014122847.1,Ssa#XM_014122847.1	ssa-miR-15d-5p,ssa-miR-15e-5p,ssa-miR-216c-3p,ssa-miR-101a-3p	ubiquitin carboxyl-terminal hydrolase isozyme L5 isoform X1	ubiquitin-dependent protein catabolic process,thiol-dependent ubiquitin-specific protease activity,Ino80 complex,cranial skeletal system development,protein deubiquitination,proteasome binding
UCHL5	GIYK01024222	Ssa#XM_014122847.1	ssa-miR-15d-5p,ssa-miR-15e-5p,ssa-miR-216c-3p,ssa-miR-101a-3p	ubiquitin carboxyl-terminal hydrolase isozyme L5 isoform X2	ubiquitin-dependent protein catabolic process,thiol-dependent ubiquitin-specific protease activity,Ino80 complex,protein deubiquitination,proteasome binding
UBXN2A	GIYK01016901	Ssa#XM_014205722.1	ssa-miR-29b-1-5p,ssa-miR-142b-5p	UBX domain-containing protein 2A	protein binding
UBTD1	GIYK01046634	Ssa#XM_014158376.1	ssa-miR-101b-3p,ssa-miR-218a-5p,ssa-miR-101a-3p,ssa-miR-205b-5p,ssa-miR-novel-16-5p	ubiquitin domain-containing protein 1	protein binding
UBTD1	GIYK01059073	Ssa#XM_014158376.1	ssa-miR-15d-5p,ssa-miR-15e-5p,ssa-miR-218a-5p,ssa-miR-457ab-5p	ubiquitin domain-containing protein 1	protein binding
ubr7	GIYK01038338,GIYK01038339,GIYK01038337	Ssa#XM_014144711.1,Ssa#XM_014144711.1,Ssa#XM_014144711.1	ssa-miR-101b-3p,ssa-miR-101a-3p	putative E3 ubiquitin-protein ligase UBR7 isoform X1	protein ubiquitination,ubiquitin protein ligase activity,zinc ion binding
UBL3	GIYK01020915	Ssa#XM_014212313.1	ssa-miR-216c-3p,ssa-miR-novel-16-3p,ssa-miR-101a-3p,ssa-miR-19a-2-3p	ubiquitin-like protein 3
UBL3	GIYK01020914,GIYK01020917	Ssa#XM_014212313.1,Ssa#XM_014212313.1	ssa-miR-216c-3p,ssa-miR-101a-3p,ssa-miR-19a-2-3p	ubiquitin-like protein 3	protein binding,plasma membrane
UBL3	GIYK01020916	Ssa#XM_014212313.1	ssa-miR-216c-3p,ssa-miR-101a-3p,ssa-miR-19a-2-3p	ubiquitin-like protein 3	protein binding,plasma membrane
UBIAD1	GIYK01032391	Ssa#XM_014135386.1	ssa-miR-8163-5p,ssa-miR-203b-3p		integral component of membrane,transferase activity transferring alkyl or aryl (other than methyl) groups
UBIAD1	GIYK01032393	Ssa#XM_014135386.1	ssa-miR-15e-5p,ssa-miR-15d-5p,ssa-miR-203b-3p,ssa-miR-457ab-5p,ssa-miR-214-1-2-3p,ssa-miR-8163-5p,ssa-miR-214-3-3p,ssa-miR-216c-3p,ssa-miR-200b-3p	ubiA prenyltransferase domain-containing protein 1-like	antioxidant activity,cardiovascular system development,cellular response to fluid shear stress,ubiquinone biosynthetic process via 34-dihydroxy-5-polyprenylbenzoate,menaquinone biosynthetic process,prenyltransferase activity,vitamin K biosynthetic process,oxidation-reduction process,nitric-oxide synthase activity,integral component of Golgi membrane,cellular oxidant detoxification,endothelial cel…
ube4b	GIYK01039262,GIYK01039263	Ssa#XM_014145783.1,Ssa#XM_014145783.1	ssa-miR-221-3p,ssa-miR-222b-3p,ssa-miR-novel-16-5p,ssa-miR-novel-13-5p	ubiquitin conjugation factor E4 B isoform X4,ubiquitin conjugation factor E4 B isoform X1	ubiquitin ligase complex,protein ubiquitination,ubiquitin-dependent protein catabolic process,ubiquitin-ubiquitin ligase activity
ube2t	GIYK01064385,GIYK01064384	Ssa#NM_001146570.1,Ssa#NM_001146570.1	ssa-miR-15d-5p,ssa-miR-15e-5p,ssa-miR-457ab-5p	ubiquitin-conjugating enzyme E2 T
UBE2Q2	GIYK01056895	Ssa#XM_014127181.1	ssa-miR-153a-3p,ssa-miR-218a-5p,ssa-miR-101a-3p,ssa-miR-novel-13-5p,ssa-miR-222a-5p,ssa-miR-214-1-2-3p,ssa-miR-206-3p,ssa-miR-551a-3p,ssa-miR-214-3-3p	ubiquitin-conjugating enzyme E2 Q2-like isoform X3
ube2n	GIYK01025686	Ssa#NM_001141197.2	ssa-miR-205b-5p	ubiquitin-conjugating enzyme E2 N	positive regulation of NF-kappaB transcription factor activity,ubiquitin protein ligase binding,ubiquitin ligase complex,UBC13-UEV1A complex,positive regulation of ubiquitin-protein transferase activity,fibrillar center,nucleoplasm,double-strand break repair via homologous recombination,nucleotide-binding oligomerization domain containing signaling pathway,cytosol,ubiquitin-dependent protein cata…
UBE2N	GIYK01043899	Ssa#XM_014208446.1	ssa-miR-novel-1-3p,ssa-miR-novel-16-5p
UBE2N	GIYK01043898,GIYK01062700	Ssa#XM_014208446.1,Ssa#XM_014208446.1	ssa-miR-novel-1-3p	ubiquitin-conjugating enzyme E2 N	postreplication repair,ubiquitin binding,T cell receptor signaling pathway,DNA double-strand break processing,nucleus,positive regulation of NF-kappaB transcription factor activity,protein K63-linked ubiquitination,positive regulation of histone modification,ligase activity,ATP binding,DNA damage response detection of DNA damage,regulation of histone ubiquitination,positive regulation of DNA repa…
UBE2L3	GIYK01002636	Ssa#XM_014127747.1	ssa-miR-15e-5p,ssa-miR-17-5p,ssa-miR-106a-5p,ssa-miR-106b-5p,ssa-miR-93a-5p,ssa-miR-novel-13-5p,ssa-miR-15d-5p,ssa-miR-457ab-5p,ssa-miR-214-1-2-3p,ssa-miR-20a-5p,ssa-miR-novel-12-5p	ubiquitin-conjugating enzyme E2 L3	protein ubiquitination,ubiquitin-dependent protein catabolic process,ubiquitin protein ligase binding,ATP binding,ubiquitin ligase complex,ubiquitin conjugating enzyme activity
UBE2K	GIYK01057475,GIYK01057474,GIYK01057473	Ssa#XM_014176237.1,Ssa#XM_014176237.1,Ssa#XM_014176237.1	ssa-miR-222b-3p,ssa-miR-221-3p,ssa-miR-novel-16-5p,ssa-miR-551a-3p,ssa-miR-novel-16-3p	uncharacterized protein LOC115142608 isoform X2,PREDICTED: uncharacterized protein LOC106587654 isoform X1	,protein ubiquitination,ubiquitin-protein transferase activity
ube2g2	GIYK01051132	Ssa#XM_014165761.1	ssa-miR-462b-5p	ubiquitin-conjugating enzyme E2 G2	transferase activity,ATP binding
UBE2G1	GIYK01048034,GIYK01048031	Ssa#XM_014160413.1,Ssa#XM_014160413.1	ssa-miR-15d-5p,ssa-miR-457ab-5p	ubiquitin-conjugating enzyme E2 G1-like	transferase activity,ATP binding
UBE2G1	GIYK01048029,GIYK01048032,GIYK01048035	Ssa#XM_014160413.1,Ssa#XM_014160413.1,Ssa#XM_014160413.1	ssa-miR-15d-5p,ssa-miR-457ab-5p
ube2e3	GIYK01056020,GIYK01050822	Ssa#XM_014165028.1,Ssa#XM_014165028.1	ssa-miR-216c-3p	Ubiquitin-conjugating enzyme E2 E3,ubiquitin-conjugating enzyme E2 E3	ATP binding,protein ubiquitination,ubiquitin conjugating enzyme activity
UBE2D4	GIYK01054609,GIYK01048275,GIYK01048274,GIYK01054608	Ssa#XM_014172029.1,Ssa#XM_014172029.1,Ssa#XM_014172029.1,Ssa#XM_014172029.1	ssa-miR-15e-5p,ssa-miR-205b-5p,ssa-miR-222a-5p,ssa-miR-15d-5p,ssa-miR-203b-3p,ssa-miR-457ab-5p,ssa-miR-551a-3p,ssa-miR-200b-3p	ubiquitin-conjugating enzyme E2 D4 isoform X1,ubiquitin-conjugating enzyme E2 D4	protein K63-linked ubiquitination,ubiquitin-dependent protein catabolic process,ubiquitin protein ligase binding,protein K48-linked ubiquitination,protein K29-linked ubiquitination,ATP binding,ubiquitin ligase complex,protein K11-linked ubiquitination,ubiquitin conjugating enzyme activity,protein K6-linked ubiquitination,protein K27-linked ubiquitination
UBE2C	GIYK01029809	Ssa#XM_014132238.1	ssa-miR-15d-5p,ssa-miR-15e-5p,ssa-miR-457ab-5p	ubiquitin-conjugating enzyme E2 C	transferase activity,ATP binding
UBE2A	GIYK01056268,GIYK01056267	Ssa#XM_014174199.1,Ssa#XM_014174199.1	ssa-miR-216c-3p,ssa-miR-19a-2-3p,ssa-miR-222a-5p	ubiquitin-conjugating enzyme E2 A-like	ubiquitin protein ligase binding,HULC complex,nucleoplasm,maternal process involved in female pregnancy,protein polyubiquitination,XY body,cytosol,blastocyst hatching,histone ubiquitination,postreplication repair,protein autoubiquitination,proteasome-mediated ubiquitin-dependent protein catabolic process,nuclear chromatin,ATP binding,positive regulation of cell population proliferation,ubiquitin …
UBC9	GIYK01007894	Ssa#XM_014204410.1	ssa-miR-221-3p	SUMO-conjugating enzyme UBC9-like	ATP binding,protein sumoylation,nucleus,SUMO conjugating enzyme activity
UBA5	GIYK01046227,GIYK01046230,GIYK01046229,GIYK01046231,GIYK01046232	Ssa#XM_014157676.1,Ssa#XM_014157676.1,Ssa#XM_014157676.1,Ssa#XM_014157676.1,Ssa#XM_014157676.1	ssa-miR-15e-5p,ssa-miR-205b-5p,ssa-miR-15d-5p,ssa-miR-457ab-5p,ssa-miR-214-1-2-3p,ssa-miR-novel-16-5p,ssa-miR-214-3-3p	ubiquitin-like modifier-activating enzyme 5 isoform X2,ubiquitin-like modifier-activating enzyme 5	ubiquitin-like modifier activating enzyme activity
UBA5	GIYK01046228	Ssa#XM_014157676.1	ssa-miR-15d-5p,ssa-miR-15e-5p,ssa-miR-457ab-5p,ssa-miR-214-3-3p	ubiquitin-like modifier-activating enzyme 5	ubiquitin-like modifier activating enzyme activity
UAP1L1	GIYK01053170,GIYK01053171,GIYK01053172	Ssa#XM_014169053.1,Ssa#XM_014169053.1,Ssa#XM_014169053.1	ssa-miR-205b-5p	UDP-N-acetylhexosamine pyrophosphorylase-like isoform X1,UDP-N-acetylhexosamine pyrophosphorylase-like isoform X2	uridylyltransferase activity
TYRO3	GIYK01020289,GIYK01020290	Ssa#XM_014211259.1,Ssa#XM_014211259.1	ssa-miR-101b-3p,ssa-miR-15e-5p,ssa-miR-101a-3p,ssa-miR-18bc-5p,ssa-miR-457ab-5p,ssa-miR-216c-3p	tyrosine-protein kinase receptor TYRO3-like isoform X1,tyrosine-protein kinase receptor TYRO3-like isoform X2	integral component of membrane,ATP binding,transmembrane receptor protein tyrosine kinase activity,protein binding,peptidyl-tyrosine phosphorylation
TYMP	GIYK01066421,GIYK01066423	Ssa#NM_001140279.1,Ssa#NM_001140279.1	ssa-miR-200b-3p	thymidine phosphorylase	transferase activity transferring pentosyl groups,14-alpha-oligoglucan phosphorylase activity,pyrimidine nucleoside metabolic process,pyrimidine nucleobase metabolic process
TYMP	GIYK01066419,GIYK01068658,GIYK01066418,GIYK01068656,GIYK01066420,GIYK01068655,GIYK01066425,GIYK01066422,GIYK01068659,GIYK01066424	Ssa#NM_001140279.1,Ssa#NM_001140279.1,Ssa#NM_001140279.1,Ssa#NM_001140279.1,Ssa#NM_001140279.1,Ssa#NM_001140279.1,Ssa#NM_001140279.1,Ssa#NM_001140279.1,Ssa#NM_001140279.1,Ssa#NM_001140279.1	ssa-miR-301a-5p,ssa-miR-200b-3p	Thymidine phosphorylase	pyrimidine nucleoside metabolic process,pyrimidine-nucleoside phosphorylase activity,thymidine phosphorylase activity,pyrimidine nucleobase metabolic process,14-alpha-oligoglucan phosphorylase activity
TXNRD1	GIYK01029851,GIYK01029849,GIYK01029852,GIYK01029853,GIYK01029850	Ssa#XM_014132132.1,Ssa#XM_014132132.1,Ssa#XM_014132132.1,Ssa#XM_014132132.1,Ssa#XM_014132132.1	ssa-miR-15e-5p,ssa-miR-222b-3p,ssa-miR-15d-5p,ssa-miR-221-3p,ssa-miR-457ab-5p	thioredoxin reductase 1, cytoplasmic-like	cell redox homeostasis,thioredoxin-disulfide reductase activity,electron transport chain,flavin adenine dinucleotide binding,protein disulfide oxidoreductase activity,cellular oxidant detoxification,electron transfer activity
TXNRD1	GIYK01029854	Ssa#XM_014132132.1	ssa-miR-15e-5p,ssa-miR-222b-3p,ssa-miR-15d-5p,ssa-miR-221-3p,ssa-miR-457ab-5p	thioredoxin reductase 1, cytoplasmic-like	cell redox homeostasis,thioredoxin-disulfide reductase activity,electron transport chain,flavin adenine dinucleotide binding,protein disulfide oxidoreductase activity,cellular oxidant detoxification,electron transfer activity
txnl4a	GIYK01045426,GIYK01045425	Ssa#XM_014156173.1,Ssa#XM_014156173.1	ssa-miR-222b-3p,ssa-miR-146b-5p,ssa-miR-221-3p,ssa-miR-146d-5p,ssa-miR-146a-5p	thioredoxin-like isoform X2
TXNIP	GIYK01036918,GIYK01036926,GIYK01036909,GIYK01036914,GIYK01036908,GIYK01036912,GIYK01036924,GIYK01036913,GIYK01036921,GIYK01036916,GIYK01036927,GIYK01036911,GIYK01036917	Ssa#XM_014142278.1,Ssa#XM_014142278.1,Ssa#XM_014142278.1,Ssa#XM_014142278.1,Ssa#XM_014142278.1,Ssa#XM_014142278.1,Ssa#XM_014142278.1,Ssa#XM_014142278.1,Ssa#XM_014142278.1,Ssa#XM_014142278.1,Ssa#XM_014142278.1,Ssa#XM_014142278.1,Ssa#XM_014142278.1	ssa-miR-218a-5p,ssa-miR-205b-5p,ssa-miR-214-1-2-3p,ssa-miR-novel-16-5p,ssa-miR-8163-5p,ssa-miR-20a-5p	thioredoxin-interacting protein-like,thioredoxin-interacting protein isoform X2
TXNIP	GIYK01058228,GIYK01058219,GIYK01058223,GIYK01058230,GIYK01058217,GIYK01058220,GIYK01058224,GIYK01058226,GIYK01058225,GIYK01058221,GIYK01058216,GIYK01058215,GIYK01058235,GIYK01058231,GIYK01058229,GIYK01058227,GIYK01058218,GIYK01058222,GIYK01058234,GIYK01058232,GIYK01058233	Ssa#NM_001140431.1,Ssa#NM_001140431.1,Ssa#NM_001140431.1,Ssa#NM_001140431.1,Ssa#NM_001140431.1,Ssa#NM_001140431.1,Ssa#NM_001140431.1,Ssa#NM_001140431.1,Ssa#NM_001140431.1,Ssa#NM_001140431.1,Ssa#NM_001140431.1,Ssa#NM_001140431.1,Ssa#NM_001140431.1,Ssa#NM_001140431.1,Ssa#NM_001140431.1,Ssa#NM_001140431.1,Ssa#NM_001140431.1,Ssa#NM_001140431.1,Ssa#NM_001140431.1,Ssa#NM_001140431.1,Ssa#NM_001140431.1	ssa-miR-222b-3p,ssa-miR-17-5p,ssa-miR-106a-5p,ssa-miR-106b-5p,ssa-miR-205b-5p,ssa-miR-novel-13-5p,ssa-miR-18bc-5p,ssa-miR-221-3p,ssa-miR-214-1-2-3p,ssa-miR-8163-5p,ssa-miR-216c-3p,ssa-miR-20a-5p	thioredoxin-interacting protein-like,thioredoxin-interacting protein isoform X2
TXNIP	GIYK01036920,GIYK01036910,GIYK01036930,GIYK01036919,GIYK01036925	Ssa#XM_014142278.1,Ssa#XM_014142278.1,Ssa#XM_014142278.1,Ssa#XM_014142278.1,Ssa#XM_014142278.1	ssa-miR-218a-5p,ssa-miR-20a-5p	thioredoxin-interacting protein-like	cytoplasm,ubiquitin protein ligase binding,protein transport
TXNDC5	GIYK01047444,GIYK01047447,GIYK01047446,GIYK01047445	Ssa#XM_014159726.1,Ssa#XM_014159726.1,Ssa#XM_014159726.1,Ssa#XM_014159726.1	ssa-miR-146b-5p,ssa-miR-462b-5p,ssa-miR-146d-5p,ssa-miR-146a-5p,ssa-miR-301a-5p,ssa-miR-216c-3p	thioredoxin domain-containing protein 5-like,unnamed protein product	cell redox homeostasis,protein disulfide isomerase activity
TXNDC5	GIYK01047448	Ssa#XM_014159726.1	ssa-miR-146b-5p,ssa-miR-462b-5p,ssa-miR-146d-5p,ssa-miR-146a-5p,ssa-miR-301a-5p,ssa-miR-216c-3p	unnamed protein product	cell redox homeostasis,protein disulfide isomerase activity
TXN	GIYK01045423	Ssa#XM_014156173.1	ssa-miR-210-1-5p,ssa-miR-novel-2-5p,ssa-miR-novel-10-3p	thioredoxin-like	cell redox homeostasis,oxidation-reduction process,glycerol ether metabolic process,protein disulfide oxidoreductase activity
TUSC2	GIYK01052492,GIYK01052493	Ssa#XM_014216613.1,Ssa#XM_014216613.1	ssa-miR-218b-5p,ssa-miR-8163-3p,ssa-miR-novel-10-3p	tumor suppressor candidate 2-like
TULP3	GIYK01043866,GIYK01043867,GIYK01043869,GIYK01043868,GIYK01043865	Ssa#XM_014208384.1,Ssa#XM_014208384.1,Ssa#XM_014208384.1,Ssa#XM_014208384.1,Ssa#XM_014208384.1	ssa-miR-101b-3p,ssa-miR-101a-3p,ssa-miR-19a-2-3p,ssa-miR-200b-3p	tubby-related protein 3-like isoform X2,tubby protein homolog isoform X1
TULP3	GIYK01018501,GIYK01018500,GIYK01018502	Ssa#XM_014208384.1,Ssa#XM_014208384.1,Ssa#XM_014208384.1	ssa-miR-101b-3p,ssa-miR-101a-3p,ssa-miR-203b-3p,ssa-miR-novel-12-5p,ssa-miR-19a-2-3p,ssa-miR-200b-3p	tubby protein homolog isoform X1,tubby-related protein 3-like isoform X3
TUFT1	GIYK01065193,GIYK01065194,GIYK01065195	Ssa#XM_014151935.1,Ssa#XM_014151935.1,Ssa#XM_014151935.1	ssa-miR-216c-3p	tuftelin-like isoform X1	protein binding
tube1	GIYK01016264,GIYK01016263,GIYK01016262	Ssa#XM_014205009.1,Ssa#XM_014205009.1,Ssa#XM_014205009.1	ssa-miR-101b-3p,ssa-miR-101a-3p,ssa-miR-17-5p,ssa-miR-106a-5p,ssa-miR-106b-5p,ssa-miR-93a-5p,ssa-miR-20a-5p	tubulin epsilon chain	microtubule-based process,GTP binding,microtubule,GTPase activity
TUBB4B	GIYK01047965,GIYK01047966,GIYK01047964	Ssa#XM_014212152.1,Ssa#XM_014212152.1,Ssa#XM_014212152.1	ssa-miR-200b-3p	tubulin beta-4B chain isoform X3	GTP binding,microtubule,GTPase activity,structural constituent of cytoskeleton,microtubule-based process
TUBB4B	GIYK01054889	Ssa#XM_014212152.1	ssa-miR-200b-3p	tubulin beta-4B chain isoform X1	microtubule-based process,GTP binding,microtubule,cytoskeleton organization,structural constituent of cytoskeleton,GTPase activity
TUBB4B	GIYK01054888,GIYK01054892	Ssa#XM_014212152.1,Ssa#XM_014212152.1	ssa-miR-200b-3p	tubulin beta-4B chain isoform X3	GTP binding,microtubule,GTPase activity,structural constituent of cytoskeleton,microtubule-based process
TUBA1C	GIYK01052143,GIYK01030400	Ssa#XM_014167248.1,Ssa#XM_014167248.1	ssa-miR-1-3p,ssa-miR-93a-5p,ssa-miR-novel-16-3p,ssa-miR-206-3p,ssa-miR-20a-5p	tubulin alpha-1C chain,tubulin alpha chain-like	microtubule-based process,mitotic cell cycle,GTP binding,cytoplasm,microtubule,cytoskeleton organization,structural constituent of cytoskeleton,GTPase activity,microtubule cytoskeleton organization
TUBA1C	GIYK01030401	Ssa#XM_014167248.1	ssa-miR-206-3p	tubulin alpha-1C chain	mitotic cell cycle,GTP binding,cytoplasm,microtubule,structural constituent of cytoskeleton,GTPase activity,microtubule cytoskeleton organization
TUBA1A	GIYK01041152,GIYK01041155,GIYK01041153,GIYK01041160,GIYK01041154,GIYK01041156,GIYK01041158,GIYK01041151,GIYK01041157,GIYK01041159	Ssa#XM_014167248.1,Ssa#XM_014189195.1,Ssa#XM_014167248.1,Ssa#XM_014189195.1,Ssa#XM_014189195.1,Ssa#XM_014167248.1,Ssa#XM_014189195.1,Ssa#XM_014189195.1,Ssa#XM_014167248.1,Ssa#XM_014189195.1	ssa-miR-218a-5p,ssa-miR-206-3p	Tubulin alpha chain	extracellular exosome,mitotic cell cycle,GTP binding,cytoplasm,microtubule,structural constituent of cytoskeleton,GTPase activity,microtubule cytoskeleton organization
TUBA1A	GIYK01056431	Ssa#XM_014189195.1	ssa-miR-1-3p,ssa-miR-206-3p,ssa-miR-200b-3p	tubulin alpha chain	microtubule-based process,GTP binding,cytoplasm,microtubule,cytoskeleton organization,structural constituent of cytoskeleton,GTPase activity
TUBA1A	GIYK01056433,GIYK01067936	Ssa#XM_014189195.1,Ssa#XM_014189195.1	ssa-miR-1-3p,ssa-miR-218a-5p,ssa-miR-206-3p,ssa-miR-200b-3p	tubulin alpha chain	microtubule-based process,vesicle-mediated transport,GTP binding,cytoplasm,clathrin coat of trans-Golgi network vesicle,microtubule,glial cell development,intracellular protein transport,myelination,cytoskeleton organization,clathrin coat of coated pit,structural constituent of cytoskeleton,GTPase activity
TUBA1A	GIYK01043162,GIYK01042217,GIYK01043161	Ssa#XM_014152092.1,Ssa#XM_014152092.1,Ssa#XM_014152092.1	ssa-miR-novel-2-5p	tubulin alpha chain-like	extracellular exosome,GTPase activity,cytoplasm,microtubule,GTP binding,structural constituent of cytoskeleton,mitotic cell cycle,microtubule cytoskeleton organization
TTPA	GIYK01039826,GIYK01039827	Ssa#XM_014214675.1,Ssa#XM_014214675.1	ssa-miR-30a-1-2-5p,ssa-miR-222a-5p,ssa-miR-30e-5p,ssa-miR-216c-3p,ssa-miR-200b-3p	alpha-tocopherol transfer protein-like isoform X2,alpha-tocopherol transfer protein-like isoform X1
TTPA	GIYK01006872,GIYK01006871	Ssa#XM_014190280.1,Ssa#XM_014190280.1	ssa-miR-101b-3p,ssa-miR-101a-3p	alpha-tocopherol transfer protein-like	chordate embryonic development,central nervous system development
TTPA	GIYK01006874,GIYK01006870,GIYK01006873	Ssa#XM_014190280.1,Ssa#XM_014190280.1,Ssa#XM_014190280.1	ssa-miR-101b-3p,ssa-miR-101a-3p
TTK	GIYK01005211	Ssa#XM_014168447.1	ssa-miR-novel-16-5p,ssa-miR-146b-5p	dual specificity protein kinase Ttk-like isoform X1	mitotic cell cycle checkpoint,ATP binding,chromosome separation,protein binding,protein phosphorylation,protein serine/threonine/tyrosine kinase activity
TTC8	GIYK01019911,GIYK01019912	Ssa#XM_014178305.1,Ssa#XM_014178305.1	ssa-miR-15d-5p,ssa-miR-15e-5p,ssa-miR-457ab-5p,ssa-miR-novel-13-5p	tetratricopeptide repeat protein 8-like isoform X2,tetratricopeptide repeat protein 8-like isoform X1	BBSome,protein binding,non-motile cilium assembly
TTC5	GIYK01017509,GIYK01017510	Ssa#XM_014207003.1,Ssa#XM_014207003.1	ssa-miR-101b-3p,ssa-miR-222b-3p,ssa-miR-218a-5p,ssa-miR-18bc-5p,ssa-miR-221-3p,ssa-miR-8163-5p,ssa-miR-novel-12-5p	tetratricopeptide repeat protein 5-like isoform X1	protein binding
TTC23	GIYK01025428	Ssa#XM_014124115.1	ssa-miR-205b-5p	tetratricopeptide repeat protein 23 isoform X2	protein binding
TTC13	GIYK01038164,GIYK01038163	Ssa#XM_014205870.1,Ssa#XM_014205870.1	ssa-miR-218a-5p,ssa-miR-146d-5p,ssa-miR-200b-3p	tetratricopeptide repeat protein 13-like isoform X3,tetratricopeptide repeat protein 13-like isoform X4	protein binding
TSR3	GIYK01046907	Ssa#XM_014158932.1	ssa-miR-8163-3p	ribosome biogenesis protein TSR3 homolog	rRNA processing
TSPYL1	GIYK01039590,GIYK01039589,GIYK01039594,GIYK01039592,GIYK01039588	Ssa#XM_014146465.1,Ssa#XM_014146465.1,Ssa#XM_014146465.1,Ssa#XM_014146465.1,Ssa#XM_014146465.1	ssa-miR-216c-3p,ssa-miR-novel-16-5p	Testis-specific Y-encoded-like protein 1	nucleosome assembly,nucleus
TSPAN7	GIYK01012592,GIYK01021067,GIYK01012593,GIYK01021066	Ssa#XM_014199770.1,Ssa#NM_001141561.2,Ssa#XM_014199770.1,Ssa#NM_001141561.2	ssa-miR-15e-5p,ssa-miR-146b-5p,ssa-miR-18bc-5p,ssa-miR-15d-5p,ssa-miR-146d-5p,ssa-miR-146a-5p,ssa-miR-216c-3p,ssa-miR-214-3-3p	tetraspanin-7-like	integral component of membrane
TSPAN31	GIYK01063615,GIYK01063622,GIYK01063619,GIYK01063614,GIYK01063621,GIYK01063620,GIYK01063618,GIYK01063623	Ssa#XM_014167196.1,Ssa#XM_014167196.1,Ssa#XM_014167196.1,Ssa#XM_014167196.1,Ssa#XM_014167196.1,Ssa#XM_014167196.1,Ssa#XM_014167196.1,Ssa#XM_014167196.1	ssa-miR-17-5p,ssa-miR-106a-5p,ssa-miR-106b-5p,ssa-miR-93a-5p,ssa-miR-205b-5p,ssa-miR-222a-5p,ssa-miR-221-3p,ssa-miR-20a-5p,ssa-miR-200b-3p	tetraspanin-31-like,tetraspanin-31 isoform X2,tetraspanin-31 isoform X1	integral component of membrane,integral component of plasma membrane
TSPAN31	GIYK01063624	Ssa#XM_014167196.1	ssa-miR-17-5p,ssa-miR-106a-5p,ssa-miR-106b-5p,ssa-miR-93a-5p,ssa-miR-205b-5p,ssa-miR-222a-5p,ssa-miR-20a-5p,ssa-miR-200b-3p	tetraspanin-31-like	membrane
TSPAN31	GIYK01063616,GIYK01063617,GIYK01063625	Ssa#XM_014167196.1,Ssa#XM_014167196.1,Ssa#XM_014167196.1	ssa-miR-17-5p,ssa-miR-106a-5p,ssa-miR-106b-5p,ssa-miR-93a-5p,ssa-miR-205b-5p,ssa-miR-222a-5p,ssa-miR-20a-5p,ssa-miR-200b-3p	tetraspanin-31 isoform X2	integral component of membrane
TSPAN3	GIYK01027203,GIYK01057537	Ssa#XM_014127363.1,Ssa#XM_014127363.1	ssa-miR-218a-5p,ssa-miR-19a-2-3p	tetraspanin-3-like	integral component of membrane
TSPAN3	GIYK01027204	Ssa#XM_014127363.1	ssa-miR-218a-5p,ssa-miR-19a-2-3p	tetraspanin-3-like	integral component of membrane
TSPAN13	GIYK01004919,GIYK01013250	Ssa#XM_014169954.1,Ssa#XM_014169954.1	ssa-miR-462b-5p,ssa-miR-153a-3p,ssa-miR-205b-5p,ssa-miR-206-3p	tetraspanin-13-like	integral component of membrane
tsn	GIYK01050883	Ssa#XM_014165391.1	ssa-miR-101b-3p,ssa-miR-101a-3p,ssa-miR-17-5p,ssa-miR-106a-5p,ssa-miR-106b-5p,ssa-miR-93a-5p,ssa-miR-214-1-2-3p,ssa-miR-8163-5p,ssa-miR-20a-5p	translin	RNA metabolic process,sequence-specific DNA binding,RNA binding,single-stranded DNA binding
TSKU	GIYK01022833,GIYK01022834	Ssa#XM_014214075.1,Ssa#XM_014214075.1	ssa-miR-153a-3p,ssa-miR-216c-3p	tsukushin-like isoform X2	protein binding
TSFM	GIYK01030607	Ssa#XM_014132749.1	ssa-miR-novel-16-3p	elongation factor Ts, mitochondrial	translation elongation factor activity,translational elongation,mitochondrion,protein binding
TSC22D4	GIYK01062673	Ssa#XM_014185085.1	ssa-miR-8163-5p	TSC22 domain family protein 4	DNA-binding transcription factor activity,regulation of transcription DNA-templated
TSC22D2	GIYK01006558,GIYK01006556	Ssa#XM_014189806.1,Ssa#XM_014189806.1	ssa-miR-200b-3p	TSC22 domain family protein 2-like isoform X2	DNA-binding transcription factor activity,regulation of transcription DNA-templated
TSC22D2	GIYK01006557	Ssa#XM_014189806.1	ssa-miR-200b-3p	TSC22 domain family protein 2	DNA-binding transcription factor activity,regulation of transcription DNA-templated
TRUB1	GIYK01009297	Ssa#XM_014182046.1	ssa-miR-8163-5p	probable tRNA pseudouridine synthase 1	RNA binding,pseudouridine synthase activity,pseudouridine synthesis,RNA processing
TRUB1	GIYK01014385	Ssa#XM_014182046.1	ssa-miR-8163-5p	probable tRNA pseudouridine synthase 1	RNA binding,pseudouridine synthase activity,pseudouridine synthesis,RNA processing
TRPM5	GIYK01064494,GIYK01064497	Ssa#XM_014187463.1,Ssa#XM_014187463.1	ssa-miR-15e-3p	transient receptor potential cation channel subfamily M member 5-like	integral component of membrane,calcium activated cation channel activity,sensory perception of taste,cation transmembrane transport
TRPM5	GIYK01064495,GIYK01064496	Ssa#XM_014187463.1,Ssa#XM_014187463.1	ssa-miR-15e-3p	transient receptor potential cation channel subfamily M member 5	integral component of membrane,calcium activated cation channel activity,sensory perception of taste,cation transmembrane transport
TRPC3	GIYK01020565,GIYK01020561,GIYK01020562,GIYK01020563	Ssa#XM_014176832.1,Ssa#XM_014176832.1,Ssa#XM_014176832.1,Ssa#XM_014176832.1	ssa-miR-218a-5p,ssa-miR-205b-5p,ssa-miR-19a-2-3p,ssa-miR-18bc-5p	short transient receptor potential channel 3-like	calcium ion transmembrane transport,integral component of membrane,calcium channel activity
TRMT2A	GIYK01048657	Ssa#XM_014161568.1	ssa-miR-15d-5p,ssa-miR-15e-5p,ssa-miR-457ab-5p,ssa-miR-novel-16-5p	tRNA (uracil-5-)-methyltransferase homolog A	RNA processing,RNA methyltransferase activity,RNA binding,RNA methylation
TRMT10A	GIYK01045302,GIYK01045301	Ssa#XM_014206709.1,Ssa#XM_014206709.1	ssa-miR-200b-3p	tRNA methyltransferase 10 homolog A-like	methyltransferase activity,methylation
triqk	GIYK01037472	Ssa#XM_014143274.1	ssa-miR-30a-1-2-5p,ssa-miR-30a-3-4-5p,ssa-miR-30e-5p	triple QxxK/R motif-containing protein	endoplasmic reticulum membrane,integral component of membrane
TRIP12	GIYK01049258,GIYK01049257,GIYK01049256	Ssa#XM_014213874.1,Ssa#XM_014213874.1,Ssa#XM_014213874.1	ssa-miR-15e-3p,ssa-let-7j-3p	E3 ubiquitin-protein ligase TRIP12 isoform X1	ligase activity,zinc ion binding,protein ubiquitination,ubiquitin-protein transferase activity
TRIP12	GIYK01022397,GIYK01022396,GIYK01022398,GIYK01022395	Ssa#XM_014213874.1,Ssa#XM_014213874.1,Ssa#XM_014213874.1,Ssa#XM_014213874.1	ssa-miR-15e-3p,ssa-miR-8163-3p,ssa-let-7j-3p	E3 ubiquitin-protein ligase TRIP12 isoform X11,E3 ubiquitin-protein ligase TRIP12 isoform X6,E3 ubiquitin-protein ligase TRIP12 isoform X4,E3 ubiquitin-protein ligase TRIP12 isoform X5	ubiquitin-protein transferase activity
TRIM39	GIYK01045714,GIYK01045712,GIYK01045710,GIYK01045709,GIYK01045713,GIYK01045711	Ssa#XM_014169557.1,Ssa#XM_014169557.1,Ssa#XM_014169557.1,Ssa#XM_014169557.1,Ssa#XM_014169557.1,Ssa#XM_014169557.1	ssa-miR-novel-16-3p	E3 ubiquitin-protein ligase TRIM39-like isoform X1	protein binding,metal ion binding
TRIM35	GIYK01003741,GIYK01003743	Ssa#XM_014144845.1,Ssa#XM_014144845.1	ssa-miR-novel-16-5p,ssa-miR-205b-5p	tripartite motif-containing protein 35-like isoform X3	zinc ion binding
TRIM34	GIYK01045420,GIYK01045419	Ssa#XM_014156154.1,Ssa#XM_014156154.1	ssa-miR-101b-3p,ssa-miR-101a-3p	uncharacterized protein LOC110946157, partial,tripartite motif-containing protein 16-like	,zinc ion binding
TRIM25	GIYK01053839,GIYK01053840	Ssa#XM_014193170.1,Ssa#XM_014193170.1	ssa-miR-222a-5p	E3 ubiquitin/ISG15 ligase TRIM25-like	zinc ion binding
TRIM25	GIYK01062414	Ssa#XM_014193170.1	ssa-miR-214-1-2-3p	E3 ubiquitin/ISG15 ligase TRIM25-like	ligase activity,zinc ion binding
TRIM25	GIYK01060285	Ssa#XM_014193170.1	ssa-miR-214-3-3p	tripartite motif-containing protein 16-like	zinc ion binding
TRIM25	GIYK01053812	Ssa#XM_014193170.1	ssa-miR-130a-2-3p	E3 ubiquitin/ISG15 ligase TRIM25-like	ligase activity,zinc ion binding,protein binding
TRIM23	GIYK01002563,GIYK01002564,GIYK01002561,GIYK01002562	Ssa#XM_014126908.1,Ssa#XM_014126908.1,Ssa#XM_014126908.1,Ssa#XM_014126908.1	ssa-miR-30a-1-2-5p,ssa-miR-301a-5p,ssa-miR-216c-3p,ssa-miR-214-3-3p	E3 ubiquitin-protein ligase TRIM23 isoform X2,E3 ubiquitin-protein ligase TRIM23 isoform X1	nucleic acid binding,zinc ion binding,GTP binding
TRIM16	GIYK01053835	Ssa#XM_014193170.1	ssa-miR-101b-3p,ssa-miR-222b-3p,ssa-miR-101a-3p,ssa-miR-17-5p,ssa-miR-106a-5p,ssa-miR-106b-5p,ssa-miR-93a-5p,ssa-miR-221-3p,ssa-miR-301a-5p,ssa-miR-20a-5p,ssa-miR-19a-2-3p	E3 ubiquitin/ISG15 ligase TRIM25-like	zinc ion binding
TRIM16	GIYK01062422,GIYK01063536,GIYK01025851,GIYK01025914,GIYK01025833,GIYK01025858,GIYK01025849,GIYK01025846,GIYK01062442,GIYK01066061,GIYK01062387,GIYK01025841,GIYK01062365,GIYK01062438,GIYK01025831,GIYK01025919,GIYK01025888,GIYK01053837,GIYK01062388,GIYK01065997,GIYK01025885,GIYK01066064,GIYK01025828,GIYK01062394,GIYK01025840,GIYK01062433,GIYK01025853,GIYK01025843,GIYK01025829,GIYK01025839,GIYK01062…	Ssa#XM_014193170.1,Ssa#XM_014193170.1,Ssa#XM_014193170.1,Ssa#XM_014198878.1,Ssa#XM_014190756.1,Ssa#XM_014193170.1,Ssa#XM_014193170.1,Ssa#XM_014198878.1,Ssa#XM_014198878.1,Ssa#XM_014198878.1,Ssa#XM_014198878.1,Ssa#XM_014193170.1,Ssa#XM_014193170.1,Ssa#XM_014193170.1,Ssa#XM_014193170.1,Ssa#XM_014193170.1,Ssa#XM_014193170.1,Ssa#XM_014193170.1,Ssa#XM_014198878.1,Ssa#XM_014191281.1,Ssa#XM_014193170.1,…	ssa-miR-30a-1-2-5p,ssa-miR-101b-3p,ssa-miR-15e-5p,ssa-miR-101a-3p,ssa-miR-30a-3-4-5p,ssa-miR-146b-5p,ssa-miR-novel-13-5p,ssa-miR-222a-5p,ssa-miR-15d-5p,ssa-miR-203b-3p,ssa-miR-30e-5p,ssa-miR-146d-5p,ssa-miR-214-1-2-3p,ssa-miR-457ab-5p,ssa-miR-146a-5p,ssa-miR-novel-16-5p,ssa-miR-214-3-3p,ssa-miR-200b-3p	fish virus induced TRIM protein,tripartite motif-containing protein 16-like	chaperone binding,protein binding,zinc ion binding
TRIM16	GIYK01062401,GIYK01062409	Ssa#XM_014193170.1,Ssa#XM_014193170.1	ssa-miR-novel-16-5p,ssa-miR-222a-5p	E3 ubiquitin/ISG15 ligase TRIM25-like isoform X1	ligase activity,zinc ion binding
TRIM16	GIYK01025862	Ssa#XM_014193170.1	ssa-miR-novel-13-5p	tripartite motif-containing protein 16-like	protein binding,zinc ion binding
TRIM16	GIYK01066066,GIYK01062431,GIYK01062427,GIYK01025894,GIYK01062398,GIYK01062378,GIYK01068587,GIYK01062400,GIYK01068566,GIYK01068598,GIYK01062419,GIYK01062406,GIYK01062436,GIYK01062435,GIYK01068558	Ssa#XM_014198878.1,Ssa#XM_014191281.1,Ssa#XM_014191281.1,Ssa#XM_014198878.1,Ssa#XM_014193170.1,Ssa#XM_014191281.1,Ssa#XM_014193170.1,Ssa#XM_014193170.1,Ssa#XM_014198878.1,Ssa#XM_014198878.1,Ssa#XM_014191281.1,Ssa#XM_014193170.1,Ssa#XM_014191281.1,Ssa#XM_014191281.1,Ssa#XM_014193170.1	ssa-miR-15e-5p,ssa-miR-146b-5p,ssa-miR-novel-13-5p,ssa-miR-222a-5p,ssa-miR-15d-5p,ssa-miR-146d-5p,ssa-miR-457ab-5p,ssa-miR-146a-5p,ssa-miR-214-3-3p	tripartite motif-containing protein 16-like	protein binding,zinc ion binding
TRIM16	GIYK01068582,GIYK01011962,GIYK01066001,GIYK01025926,GIYK01063534,GIYK01065912,GIYK01066193,GIYK01066195,GIYK01066190	Ssa#XM_014198878.1,Ssa#XM_014198878.1,Ssa#XM_014191281.1,Ssa#XM_014193170.1,Ssa#XM_014198878.1,Ssa#XM_014193170.1,Ssa#XM_014198878.1,Ssa#XM_014193170.1,Ssa#XM_014198878.1	ssa-miR-15e-5p,ssa-miR-15d-5p,ssa-miR-457ab-5p,ssa-miR-214-1-2-3p,ssa-miR-214-3-3p	tripartite motif-containing protein 16-like	protein binding,zinc ion binding
TRIM16	GIYK01060288,GIYK01060286	Ssa#XM_014193170.1,Ssa#XM_014193170.1	ssa-miR-218a-5p	E3 ubiquitin/ISG15 ligase TRIM25-like isoform X2,tripartite motif-containing protein 16-like isoform X1	ligase activity,protein binding,zinc ion binding
TRIM16	GIYK01025900	Ssa#XM_014193170.1	ssa-miR-222a-5p,ssa-miR-200b-3p
TRIM16	GIYK01068597	Ssa#XM_014193170.1	ssa-miR-214-3-3p	tripartite motif-containing protein 16-like	protein binding,zinc ion binding
TRIM16	GIYK01063533	Ssa#XM_014193170.1	ssa-miR-214-3-3p		protein binding
TRIM16	GIYK01057452,GIYK01057454	Ssa#XM_014193170.1,Ssa#XM_014193170.1	ssa-miR-101a-3p	tripartite motif-containing protein 16-like	zinc ion binding
TRIM16	GIYK01025989,GIYK01025987,GIYK01025991,GIYK01025992,GIYK01062384,GIYK01025988,GIYK01025986,GIYK01025990	Ssa#XM_014193170.1,Ssa#XM_014193170.1,Ssa#XM_014193170.1,Ssa#XM_014193170.1,Ssa#XM_014193170.1,Ssa#XM_014193170.1,Ssa#XM_014193170.1,Ssa#XM_014193170.1	ssa-miR-101b-3p,ssa-miR-101a-3p,ssa-miR-18bc-5p,ssa-miR-222a-5p,ssa-miR-214-1-2-3p,ssa-miR-8163-5p,ssa-miR-216c-3p,ssa-miR-novel-16-3p,ssa-miR-214-3-3p	E3 ubiquitin/ISG15 ligase TRIM25-like isoform X2,E3 ubiquitin/ISG15 ligase TRIM25-like isoform X1	ligase activity,zinc ion binding
TRIM16	GIYK01066202	Ssa#XM_014193170.1	ssa-miR-8163-5p,ssa-miR-301a-5p	E3 ubiquitin/ISG15 ligase TRIM25-like	ligase activity,zinc ion binding
TRIM16	GIYK01041563	Ssa#XM_014193170.1	ssa-miR-216c-3p,ssa-miR-novel-13-5p	E3 ubiquitin/ISG15 ligase TRIM25-like	ligase activity,zinc ion binding
TRIM16	GIYK01062392	Ssa#XM_014193170.1	ssa-miR-15d-5p,ssa-miR-15e-5p,ssa-miR-457ab-5p	tripartite motif-containing protein 16-like	protein binding,zinc ion binding
TRIM16	GIYK01025895	Ssa#XM_014198878.1	ssa-miR-222a-5p	tripartite motif-containing protein 16-like isoform X2	protein binding,zinc ion binding
TRIM16	GIYK01025998	Ssa#XM_014193170.1	ssa-miR-15a-3p,ssa-miR-455-3p	tripartite motif-containing protein 16-like	protein binding
TRIM16	GIYK01062364	Ssa#XM_014176221.1	ssa-miR-15a-3p	Tripartite motif-containing protein 16-like
TRIB2	GIYK01016910,GIYK01016906,GIYK01038602,GIYK01038605	Ssa#XM_014145158.1,Ssa#XM_014145158.1,Ssa#XM_014145158.1,Ssa#XM_014145158.1	ssa-miR-15e-5p,ssa-miR-222b-3p,ssa-miR-218a-5p,ssa-miR-15d-5p,ssa-miR-221-3p,ssa-let-7e-5p,ssa-miR-457ab-5p	tribbles homolog 2	protein kinase activity,ATP binding,protein phosphorylation
TRIB2	GIYK01016911,GIYK01016908,GIYK01016909,GIYK01038604,GIYK01016907	Ssa#XM_014145158.1,Ssa#XM_014145158.1,Ssa#XM_014145158.1,Ssa#XM_014145158.1,Ssa#XM_014145158.1	ssa-miR-15e-5p,ssa-miR-222b-3p,ssa-miR-218a-5p,ssa-miR-15d-5p,ssa-miR-221-3p,ssa-let-7e-5p,ssa-miR-457ab-5p	tribbles homolog 2-like isoform X2	protein kinase activity,ATP binding,protein phosphorylation
TRIB2	GIYK01038606	Ssa#XM_014145158.1	ssa-miR-15e-5p,ssa-miR-222b-3p,ssa-miR-218a-5p,ssa-miR-15d-5p,ssa-miR-221-3p,ssa-miR-457ab-5p	tribbles homolog 2-like isoform X1	protein kinase activity,ATP binding,protein phosphorylation
tri13	GIYK01050559	Ssa#NM_001139899.1	ssa-miR-301a-5p	tripartite motif-containing 13-like isoform X2	zinc ion binding
trf	GIYK01006920,GIYK01068051,GIYK01006893,GIYK01006912,GIYK01006919,GIYK01006911,GIYK01006922,GIYK01006887,GIYK01006898,GIYK01006889,GIYK01006895,GIYK01068050,GIYK01006907,GIYK01006921,GIYK01006910,GIYK01006925,GIYK01006905,GIYK01068048,GIYK01068049,GIYK01006899,GIYK01006896,GIYK01006914,GIYK01006904,GIYK01006900,GIYK01006906,GIYK01006913,GIYK01006902,GIYK01006915,GIYK01006924,GIYK01006918,GIYK01006…	Ssa#XM_014190855.1,Ssa#XM_014190855.1,Ssa#XM_014190855.1,Ssa#XM_014190855.1,Ssa#XM_014190855.1,Ssa#XM_014190855.1,Ssa#NM_001123655.1,Ssa#XM_014190855.1,Ssa#NM_001123655.1,Ssa#XM_014190855.1,Ssa#XM_014190855.1,Ssa#XM_014190855.1,Ssa#XM_014190855.1,Ssa#NM_001123655.1,Ssa#XM_014190855.1,Ssa#NM_001123655.1,Ssa#XM_014190855.1,Ssa#XM_014190855.1,Ssa#XM_014190855.1,Ssa#XM_014190855.1,Ssa#XM_014190855.1,…	ssa-miR-15e-5p,ssa-miR-1-3p,ssa-miR-17-5p,ssa-miR-93a-5p,ssa-miR-15d-5p,ssa-miR-146d-5p,ssa-miR-206-3p	serotransferrin-2-like isoform X1,serotransferrin-1 isoform X1,transferrin	extracellular space,,metal ion binding,response to lipopolysaccharide,ion transport,iron ion homeostasis
trf	GIYK01006917	Ssa#XM_014190855.1	ssa-miR-15e-5p,ssa-miR-1-3p,ssa-miR-15d-5p,ssa-miR-146d-5p,ssa-miR-206-3p	transferrin	extracellular space,ion transport,metal ion binding,iron ion homeostasis
trf	GIYK01006903,GIYK01006897,GIYK01006908,GIYK01006909	Ssa#XM_014190855.1,Ssa#XM_014190855.1,Ssa#XM_014190855.1,Ssa#XM_014190855.1	ssa-miR-93a-5p,ssa-miR-1-3p,ssa-miR-206-3p,ssa-miR-17-5p	PREDICTED: serotransferrin-1-like, partial	extracellular region
trf	GIYK01006890,GIYK01006888,GIYK01006894,GIYK01006892,GIYK01006886,GIYK01006891	Ssa#XM_014190855.1,Ssa#XM_014190855.1,Ssa#NM_001123655.1,Ssa#XM_014190855.1,Ssa#XM_014190855.1,Ssa#XM_014190855.1	ssa-miR-15e-5p,ssa-miR-1-3p,ssa-miR-17-5p,ssa-miR-93a-5p,ssa-miR-15d-5p,ssa-miR-206-3p
TRAPPC6B	GIYK01048938,GIYK01048939,GIYK01048940	Ssa#XM_014162070.1,Ssa#XM_014162070.1,Ssa#XM_014162070.1	ssa-miR-218a-5p,ssa-miR-146b-5p,ssa-miR-203b-3p,ssa-miR-146d-5p,ssa-miR-146a-5p,ssa-miR-novel-16-3p,ssa-miR-novel-12-5p	trafficking protein particle complex subunit 6B-like	cis-Golgi network,regulation of GTPase activity,TRAPP complex,trans-Golgi network,endoplasmic reticulum to Golgi vesicle-mediated transport
trappc11	GIYK01063179,GIYK01063172,GIYK01063169,GIYK01063171,GIYK01063176,GIYK01063175,GIYK01063170,GIYK01063168	Ssa#XM_014176462.1,Ssa#XM_014176462.1,Ssa#XM_014176462.1,Ssa#XM_014176462.1,Ssa#XM_014176462.1,Ssa#XM_014176462.1,Ssa#XM_014176462.1,Ssa#XM_014176462.1	ssa-miR-222b-3p,ssa-miR-205b-5p,ssa-miR-221-3p,ssa-miR-214-1-2-3p,ssa-miR-8163-5p,ssa-miR-301a-5p,ssa-miR-novel-16-3p,ssa-miR-214-3-3p	trafficking protein particle complex subunit 11	,Golgi apparatus,regulation of response to endoplasmic reticulum stress,vesicle-mediated transport,Golgi organization,protein N-linked glycosylation,liver development,retina development in camera-type eye,lipid homeostasis,protein secretion
TRAPPC11	GIYK01063174,GIYK01063177,GIYK01063178,GIYK01063173	Ssa#XM_014176462.1,Ssa#XM_014176462.1,Ssa#XM_014176462.1,Ssa#XM_014176462.1	ssa-miR-222b-3p,ssa-miR-205b-5p,ssa-miR-221-3p,ssa-miR-214-1-2-3p,ssa-miR-8163-5p,ssa-miR-301a-5p	trafficking protein particle complex subunit 11	regulation of response to endoplasmic reticulum stress,Golgi organization,protein N-linked glycosylation,liver development,retina development in camera-type eye,lipid homeostasis,protein secretion
traf4	GIYK01022656,GIYK01022655,GIYK01022657,GIYK01022654	Ssa#NM_001173598.1,Ssa#NM_001173598.1,Ssa#NM_001173598.1,Ssa#NM_001173598.1	ssa-miR-101a-3p,ssa-miR-216c-3p,ssa-miR-novel-16-3p,ssa-miR-19a-2-3p,ssa-miR-122-2-3p	TNF receptor-associated factor 4-like	tumor necrosis factor receptor binding,regulation of apoptotic process,activation of NF-kappaB-inducing kinase activity,cytoplasm,positive regulation of JNK cascade,zinc ion binding
traf4	GIYK01022658	Ssa#NM_001173598.1	ssa-miR-101a-3p,ssa-miR-216c-3p,ssa-miR-novel-16-3p,ssa-miR-19a-2-3p,ssa-miR-122-2-3p		protein binding,zinc ion binding
traf4	GIYK01022660,GIYK01022659	Ssa#NM_001173598.1,Ssa#NM_001173598.1	ssa-miR-101a-3p,ssa-miR-216c-3p,ssa-miR-novel-16-3p,ssa-miR-19a-2-3p,ssa-miR-122-2-3p	unnamed protein product	protein binding,positive regulation of JNK cascade,activation of NF-kappaB-inducing kinase activity,zinc ion binding
TRAF3IP2	GIYK01001860,GIYK01001859,GIYK01001858,GIYK01001862	Ssa#XM_014209734.1,Ssa#XM_014209734.1,Ssa#XM_014209734.1,Ssa#XM_014209734.1	ssa-miR-218a-5p,ssa-miR-214-1-2-3p	adapter protein CIKS-like isoform X1,adapter protein CIKS-like isoform X2
TPX2	GIYK01038972,GIYK01038969,GIYK01038970,GIYK01038971,GIYK01038974,GIYK01038973	Ssa#XM_014146236.1,Ssa#XM_014146236.1,Ssa#XM_014146236.1,Ssa#XM_014146236.1,Ssa#XM_014146236.1,Ssa#XM_014146236.1	ssa-miR-203b-3p	targeting protein for Xklp2-like isoform X2	activation of protein kinase activity,spindle,microtubule,regulation of mitotic spindle organization
TPX2	GIYK01032598,GIYK01032593,GIYK01032594,GIYK01032596,GIYK01032595	Ssa#NM_001140179.1,Ssa#NM_001140179.1,Ssa#NM_001140179.1,Ssa#NM_001140179.1,Ssa#NM_001140179.1	ssa-miR-222a-5p		activation of protein kinase activity,spindle,microtubule,regulation of mitotic spindle organization
TPT1	GIYK01042246	Ssa#XM_014151049.1	ssa-miR-214-3-3p	translationally-controlled tumor protein homolog	cytoplasm,calcium ion binding
TPT1	GIYK01042247	Ssa#XM_014151049.1	ssa-miR-214-3-3p	translationally-controlled tumor protein homolog
TPT1	GIYK01042267	Ssa#XM_014151049.1	ssa-miR-214-3-3p	translationally-controlled tumor protein homolog
TPT1	GIYK01050741,GIYK01050725	Ssa#XM_014173917.1,Ssa#XM_014173917.1	ssa-miR-200b-3p	translationally-controlled tumor protein homolog,unnamed protein product
TPT1	GIYK01050726	Ssa#XM_014173917.1	ssa-miR-200b-3p	translationally-controlled tumor protein homolog	cytoplasm,calcium ion binding
TPST2	GIYK01003356,GIYK01003355	Ssa#XM_014138788.1,Ssa#XM_014138788.1	ssa-miR-218a-5p,ssa-miR-222a-5p,ssa-miR-novel-16-5p,ssa-miR-8163-5p,ssa-miR-214-3-3p	protein-tyrosine sulfotransferase 2-like	protein-tyrosine sulfotransferase activity,peptidyl-tyrosine sulfation
TPST1	GIYK01049916,GIYK01049918	Ssa#XM_014136750.1,Ssa#XM_014136750.1	ssa-miR-101b-3p,ssa-miR-218a-5p,ssa-miR-101a-3p	protein-tyrosine sulfotransferase 1 isoform X2,protein-tyrosine sulfotransferase 1 isoform X1	protein-tyrosine sulfotransferase activity,peptidyl-tyrosine sulfation
TPR	GIYK01024203	Ssa#NM_001146411.1	ssa-let-7e-5p,ssa-miR-216c-3p	nucleoprotein TPR-like isoform X3	protein import into nucleus
tpm4	GIYK01023521,GIYK01023535,GIYK01023527,GIYK01023534,GIYK01023528,GIYK01023523,GIYK01023520,GIYK01023526,GIYK01023536,GIYK01023524,GIYK01023531,GIYK01023532,GIYK01023530,GIYK01023529,GIYK01023525,GIYK01023533	Ssa#XM_014216230.1,Ssa#XM_014216230.1,Ssa#XM_014216230.1,Ssa#XM_014216230.1,Ssa#XM_014216230.1,Ssa#XM_014216230.1,Ssa#XM_014216230.1,Ssa#XM_014216230.1,Ssa#XM_014216230.1,Ssa#XM_014216230.1,Ssa#XM_014216230.1,Ssa#XM_014216230.1,Ssa#XM_014216230.1,Ssa#XM_014216230.1,Ssa#XM_014216230.1,Ssa#XM_014216230.1	ssa-miR-15e-5p,ssa-miR-1-3p,ssa-miR-17-5p,ssa-miR-106a-5p,ssa-miR-106b-5p,ssa-miR-30e-5p,ssa-miR-146d-5p,ssa-miR-20a-5p,ssa-miR-93a-5p,ssa-miR-30a-3-4-5p,ssa-miR-15d-5p,ssa-miR-301a-5p,ssa-miR-30a-1-2-5p,ssa-miR-146b-5p,ssa-miR-novel-13-5p,ssa-miR-457ab-5p,ssa-miR-206-3p,ssa-miR-214-1-2-3p,ssa-miR-214-3-3p	tropomyosin alpha-1 chain-like isoform X1,tropomyosin alpha-4 chain isoform X3
TPM4	GIYK01041073,GIYK01041075	Ssa#XM_014148681.1,Ssa#XM_014148681.1	ssa-miR-1-3p	tropomyosin alpha-4 chain isoform X3
TPM4	GIYK01023518,GIYK01023519,GIYK01023522	Ssa#XM_014216230.1,Ssa#XM_014216230.1,Ssa#XM_014216230.1	ssa-miR-1-3p,ssa-miR-206-3p	tropomyosin alpha-4 chain isoform X1	cardiac myofibril assembly,cardiac muscle contraction
tpm2	GIYK01003737,GIYK01003734,GIYK01003735,GIYK01003738,GIYK01003739	Ssa#S35581377,Ssa#S35581377,Ssa#XM_014144758.1,Ssa#XM_014144758.1,Ssa#S35581377	ssa-miR-8163-5p,ssa-miR-203b-3p,ssa-miR-216c-3p,ssa-miR-novel-16-5p	tropomyosin beta chain isoform X4,tropomyosin alpha-4 chain isoform X6,tropomyosin beta chain isoform X1,tropomyosin alpha-3 chain isoform X7
tpm2	GIYK01003736	Ssa#S35581377	ssa-miR-8163-5p,ssa-miR-216c-3p,ssa-miR-novel-16-5p	tropomyosin alpha-3 chain isoform X8	actin filament,striated muscle thin filament,actin filament binding,actin filament organization,muscle contraction
TPM1	GIYK01041074	Ssa#XM_014148681.1	ssa-miR-1-3p	tropomyosin alpha-1 chain-like isoform X1	cardiac myofibril assembly,cardiac muscle contraction
TPK1	GIYK01061970,GIYK01061973,GIYK01061969,GIYK01061972,GIYK01061975,GIYK01061974,GIYK01061966,GIYK01061967,GIYK01061968	Ssa#XM_014157159.1,Ssa#XM_014157159.1,Ssa#XM_014157159.1,Ssa#XM_014157159.1,Ssa#XM_014157159.1,Ssa#XM_014157159.1,Ssa#XM_014157159.1,Ssa#XM_014157158.1,Ssa#XM_014157159.1	ssa-miR-93a-5p,ssa-miR-106a-5p,ssa-miR-106b-5p,ssa-miR-17-5p,ssa-miR-20a-5p	thiamin pyrophosphokinase 1 isoform X3,thiamin pyrophosphokinase 1 isoform X1	ATP binding,phosphorylation,thiamine binding,thiamine metabolic process,thiamine diphosphokinase activity,kinase activity,thiamine diphosphate biosynthetic process
TPI1	GIYK01013016	Ssa#NM_001139702.1	ssa-miR-novel-13-5p,ssa-miR-205b-5p		triose-phosphate isomerase activity
TPI1	GIYK01013015	Ssa#NM_001139702.1	ssa-miR-novel-13-5p	triosephosphate isomerase B-like	triose-phosphate isomerase activity,gluconeogenesis,glycolytic process
tpgs2	GIYK01029989	Ssa#NM_001146537.1	ssa-miR-15d-5p,ssa-miR-15e-5p,ssa-miR-457ab-5p,ssa-miR-200b-3p	tubulin polyglutamylase complex subunit 2	protein polyglutamylation
tpd52l1	GIYK01016391,GIYK01016392,GIYK01016389,GIYK01016388,GIYK01016390,GIYK01016393	Ssa#NM_001140366.1,Ssa#NM_001140366.1,Ssa#NM_001140366.1,Ssa#NM_001140366.1,Ssa#NM_001140366.1,Ssa#NM_001140366.1	ssa-miR-novel-16-5p	tumor protein D53 isoform X12,tumor protein D53 homolog isoform X13,tumor protein D53 homolog isoform X2,tumor protein D53 homolog isoform X8
tpcn2	GIYK01026690,GIYK01026687,GIYK01026689,GIYK01026688	Ssa#XM_014126592.1,Ssa#XM_014126592.1,Ssa#XM_014126592.1,Ssa#XM_014126592.1	ssa-miR-218a-5p,ssa-miR-214-1-2-3p	two pore calcium channel protein 2-like,two pore calcium channel protein 2-like isoform X2	integral component of membrane,NAADP-sensitive calcium-release channel activity,voltage-gated calcium channel activity,lysosomal membrane,release of sequestered calcium ion into cytosol
TPC2L	GIYK01056835	Ssa#XM_014175225.1	ssa-miR-216c-3p,ssa-miR-206-3p	Trafficking protein particle complex subunit 2-like protein	nucleus,Golgi apparatus,TRAPP complex,perinuclear region of cytoplasm,endoplasmic reticulum,endoplasmic reticulum to Golgi vesicle-mediated transport
TPC2L	GIYK01056836,GIYK01056837,GIYK01056838	Ssa#XM_014175225.1,Ssa#XM_014175225.1,Ssa#XM_014175225.1	ssa-miR-216c-3p,ssa-miR-206-3p	Trafficking protein particle complex subunit 2-like protein,trafficking protein particle complex subunit 2-like protein isoform X2	Golgi apparatus,cytoplasm,perinuclear region of cytoplasm,endoplasmic reticulum,endoplasmic reticulum to Golgi vesicle-mediated transport
tpc2l	GIYK01056839	Ssa#XM_014175225.1	ssa-miR-206-3p
TP53INP1	GIYK01013480,GIYK01004689,GIYK01013479,GIYK01004690,GIYK01004688,GIYK01013481	Ssa#XM_014200916.1,Ssa#XM_014200916.1,Ssa#XM_014200916.1,Ssa#XM_014200916.1,Ssa#XM_014200916.1,Ssa#XM_014200916.1	ssa-miR-101b-3p,ssa-miR-222b-3p,ssa-miR-218a-5p,ssa-miR-101a-3p,ssa-miR-17-5p,ssa-miR-106a-5p,ssa-miR-93a-5p,ssa-miR-novel-13-5p,ssa-miR-novel-16-3p,ssa-miR-221-3p,ssa-miR-20a-5p	tumor protein p53-inducible nuclear protein 1	negative regulation of cell population proliferation,regulation of autophagy,regulation of transcription DNA-templated
TP53BP1	GIYK01027239,GIYK01027238	Ssa#XM_014127438.1,Ssa#XM_014127438.1	ssa-miR-206-3p	tumor suppressor p53-binding protein 1-like
TOP1MT	GIYK01047401	Ssa#XM_014159756.1	ssa-miR-200b-3p	DNA topoisomerase I, mitochondrial-like isoform X2	DNA topoisomerase type I (single strand cut ATP-independent) activity,DNA binding,chromosome,DNA topological change
TOMM40	GIYK01057786,GIYK01057784	Ssa#XM_014177061.1,Ssa#XM_014177061.1	ssa-miR-15e-3p,ssa-miR-15a-3p	mitochondrial import receptor subunit TOM40 homolog	protein import into mitochondrial matrix,mitochondrial outer membrane,protein transmembrane transporter activity
TOMM40	GIYK01057785	Ssa#XM_014177061.1	ssa-miR-15a-3p	mitochondrial import receptor subunit TOM40 homolog	protein import into mitochondrial matrix,mitochondrial outer membrane,protein transmembrane transporter activity
TOM1L2	GIYK01061836,GIYK01061835	Ssa#XM_014202048.1,Ssa#XM_014202048.1	ssa-miR-101b-3p,ssa-miR-222b-3p,ssa-miR-101a-3p,ssa-miR-93a-5p,ssa-miR-18bc-5p,ssa-miR-221-3p,ssa-miR-novel-16-5p	TOM1-like protein 2 isoform X2	intracellular protein transport
TOB1	GIYK01046385,GIYK01046384	Ssa#XM_014158051.1,Ssa#XM_014158051.1	ssa-miR-19a-2-3p,ssa-miR-200b-3p	protein Tob1-like	negative regulation of cell population proliferation
TNS2	GIYK01032709	Ssa#XM_014135669.1	ssa-miR-200b-3p	tensin-2-like isoform X1	intracellular signal transduction,protein binding,metal ion binding
TNS1	GIYK01050409,GIYK01050411	Ssa#XM_014164415.1,Ssa#XM_014164415.1	ssa-miR-novel-12-5p,ssa-miR-216c-3p,ssa-miR-214-3-3p	tensin-1 isoform	protein binding
TNPO3	GIYK01017916	Ssa#XM_014207604.1	ssa-miR-15a-3p	transportin-3	Ran GTPase binding,mRNA processing,intracellular protein transport,T cell differentiation,nucleus,RNA splicing
TNNI1	GIYK01018042,GIYK01018043	Ssa#XM_014152809.1,Ssa#XM_014152809.1	ssa-miR-30e-5p	troponin I, slow skeletal muscle-like	troponin complex
TNKS	GIYK01048627,GIYK01048628	Ssa#XM_014161536.1,Ssa#XM_014161536.1	ssa-miR-8163-5p,ssa-miR-101b-3p,ssa-miR-101a-3p	tankyrase-1-like isoform X3,tankyrase-1-like isoform X2	positive regulation of telomere maintenance via telomerase,Wnt signaling pathway,protein binding,NAD+ ADP-ribosyltransferase activity,spindle assembly
TNFRSF19	GIYK01010684	Ssa#XM_014196829.1	ssa-miR-101b-3p,ssa-miR-216c-3p,ssa-miR-101a-3p,ssa-miR-200b-3p	tumor necrosis factor receptor superfamily member 19-like	integral component of membrane
TNFRSF11B	GIYK01061601	Ssa#XM_014150008.1	ssa-miR-216c-3p	tumor necrosis factor receptor superfamily member 11B-like	integral component of membrane,protein binding
TNFAIP2	GIYK01022145	Ssa#XM_014181732.1	ssa-miR-17-5p,ssa-miR-106a-5p,ssa-miR-106b-5p,ssa-miR-93a-5p,ssa-miR-222a-5p,ssa-miR-novel-16-5p,ssa-miR-20a-5p	tumor necrosis factor alpha-induced protein 2-like	exocyst,exocytosis
TNC	GIYK01062157,GIYK01062159,GIYK01062158,GIYK01062160,GIYK01062163,GIYK01062162,GIYK01062161	Ssa#XM_014201991.1,Ssa#XM_014201991.1,Ssa#XM_014201991.1,Ssa#XM_014201991.1,Ssa#XM_014201991.1,Ssa#XM_014201991.1,Ssa#XM_014201991.1	ssa-miR-101b-3p,ssa-miR-101a-3p	tenascin-R-like isoform X1	protein binding
TMTC4	GIYK01049981	Ssa#XM_014163786.1	ssa-miR-novel-2-5p	protein O-mannosyl-transferase TMTC4	protein binding,integral component of membrane
tmsb4x	GIYK01050396	Ssa#NM_001140734.2	ssa-miR-1-3p,ssa-miR-novel-16-5p,ssa-miR-206-3p,ssa-miR-novel-16-3p,ssa-miR-200b-3p
tmsb4x	GIYK01050397	Ssa#NM_001140734.2	ssa-miR-1-3p,ssa-miR-novel-16-5p,ssa-miR-206-3p	thymosin beta-12	extracellular space,cellular response to glucocorticoid stimulus,cytosol,positive regulation of wound healing,negative regulation of neutrophil chemotaxis,atrioventricular canal development,sequestering of actin monomers,positive regulation of neutrophil migration,negative regulation of inflammatory response,atrioventricular valve morphogenesis,actin monomer binding,cytoskeleton,heart looping
TMPRSS9	GIYK01007746,GIYK01007744,GIYK01007748,GIYK01007747,GIYK01007749,GIYK01007745	Ssa#XM_014192268.1,Ssa#XM_014192268.1,Ssa#XM_014192268.1,Ssa#XM_014192268.1,Ssa#XM_014192268.1,Ssa#XM_014192268.1	ssa-miR-17-5p,ssa-miR-106a-5p,ssa-miR-106b-5p,ssa-miR-93a-5p,ssa-miR-205b-5p,ssa-miR-18bc-5p,ssa-miR-462b-5p,ssa-miR-novel-16-5p,ssa-miR-301a-5p,ssa-miR-20a-5p	transmembrane protease serine 9-like	integral component of membrane,serine-type endopeptidase activity,calcium ion binding,blood coagulation,proteolysis
TMPRSS9	GIYK01007750	Ssa#XM_014192268.1	ssa-miR-17-5p,ssa-miR-106a-5p,ssa-miR-106b-5p,ssa-miR-93a-5p,ssa-miR-462b-5p,ssa-miR-novel-16-5p,ssa-miR-301a-5p,ssa-miR-20a-5p,ssa-miR-214-3-3p	unnamed protein product	calcium ion binding,proteolysis,blood coagulation,serine-type endopeptidase activity
TMPRSS2	GIYK01010924	Ssa#XM_014137816.1	ssa-miR-125b-1-3p	transmembrane protease serine 2-like	serine-type endopeptidase activity,scavenger receptor activity,protein binding,proteolysis,integral component of membrane,endocytosis
TMPRSS2	GIYK01010925,GIYK01010926	Ssa#XM_014137816.1,Ssa#XM_014137816.1	ssa-miR-125b-1-3p	transmembrane protease serine 2-like isoform X2	serine-type endopeptidase activity,membrane,scavenger receptor activity,protein binding,proteolysis,integral component of membrane
tmod4	GIYK01004776	Ssa#XM_014162467.1	ssa-miR-205b-5p,ssa-miR-206-3p,ssa-miR-122-2-3p	tropomodulin-4-like	tropomyosin binding,actin filament binding,pointed-end actin filament capping
tmod4	GIYK01013401,GIYK01013403,GIYK01013397,GIYK01013399,GIYK01013400,GIYK01013396	Ssa#XM_014200676.1,Ssa#XM_014200676.1,Ssa#XM_014200676.1,Ssa#XM_014200676.1,Ssa#XM_014200676.1,Ssa#XM_014200676.1	ssa-miR-15e-5p,ssa-miR-205b-5p,ssa-miR-15d-5p,ssa-miR-457ab-5p,ssa-miR-206-3p,ssa-miR-8163-5p,ssa-miR-122-2-3p	tropomodulin-4 isoform X2	tropomyosin binding,actin filament binding,pointed-end actin filament capping
tmod4	GIYK01013393,GIYK01067073,GIYK01013394,GIYK01013395,GIYK01013402	Ssa#XM_014200676.1,Ssa#XM_014200676.1,Ssa#XM_014200676.1,Ssa#XM_014200676.1,Ssa#XM_014200676.1	ssa-miR-8163-5p	tropomodulin-4	tropomyosin binding,actin filament binding,skeletal myofibril assembly,pointed-end actin filament capping
TMM70	GIYK01035472	Ssa#XM_014214075.1	ssa-miR-novel-16-5p	transmembrane protein 70, mitochondrial-like	integral component of membrane
TMEM91	GIYK01004424,GIYK01004426,GIYK01004425	Ssa#XM_014156076.1,Ssa#XM_014156076.1,Ssa#XM_014156076.1	ssa-miR-30a-1-2-5p,ssa-miR-17-5p,ssa-miR-106a-5p,ssa-miR-106b-5p,ssa-miR-30a-3-4-5p,ssa-miR-93a-5p,ssa-miR-30e-5p,ssa-miR-122-2-3p,ssa-miR-20a-5p,ssa-miR-200b-3p	transmembrane protein 91-like	integral component of membrane
TMEM9	GIYK01032814,GIYK01032811	Ssa#XM_014135838.1,Ssa#XM_014135838.1	ssa-miR-15e-5p,ssa-miR-1-3p,ssa-miR-205b-5p,ssa-miR-15d-5p,ssa-let-7e-5p,ssa-miR-457ab-5p,ssa-miR-206-3p,ssa-miR-214-3-3p	transmembrane protein 9 isoform X2,putative protein 2	integral component of membrane
TMEM9	GIYK01032812,GIYK01032813	Ssa#XM_014135838.1,Ssa#XM_014135838.1	ssa-miR-15e-5p,ssa-miR-1-3p,ssa-miR-205b-5p,ssa-miR-15d-5p,ssa-let-7e-5p,ssa-miR-457ab-5p,ssa-miR-206-3p,ssa-miR-214-3-3p	transmembrane protein 9-like	integral component of membrane
TMEM86B	GIYK01014429,GIYK01014428	Ssa#XM_014202587.1,Ssa#XM_014202587.1	ssa-miR-novel-2-5p	lysoplasmalogenase-like	integral component of membrane
tmem63b	GIYK01029705	Ssa#XM_014131569.1	ssa-miR-30a-1-2-5p,ssa-miR-15e-5p,ssa-miR-218a-5p,ssa-miR-15d-5p,ssa-miR-457ab-5p,ssa-miR-206-3p,ssa-miR-8163-5p
TMEM60	GIYK01040513	Ssa#XM_014148374.1	ssa-miR-15d-5p,ssa-miR-15e-5p,ssa-miR-216c-3p,ssa-miR-457ab-5p	transmembrane protein 60-like	integral component of membrane
TMEM50A	GIYK01000410	Ssa#NM_001123572.1	ssa-miR-93a-5p,ssa-miR-106a-5p,ssa-miR-106b-5p,ssa-miR-17-5p,ssa-miR-20a-5p	transmembrane protein 50A	integral component of membrane
TMEM38A	GIYK01002399	Ssa#XM_014125291.1	ssa-miR-216c-3p	trimeric intracellular cation channel type B-like isoform X1	integral component of membrane,cation channel activity,monovalent inorganic cation transport,cation transmembrane transport
TMEM38A	GIYK01002400	Ssa#XM_014125291.1	ssa-miR-216c-3p	trimeric intracellular cation channel type B-like isoform X2	integral component of membrane,cation channel activity,monovalent inorganic cation transport,cation transmembrane transport
tmem37	GIYK01056155,GIYK01056154	Ssa#XM_014174027.1,Ssa#XM_014174027.1	ssa-miR-222a-5p	voltage-dependent calcium channel gamma-like subunit	calcium ion transmembrane transport,integral component of membrane,calcium channel activity,voltage-gated ion channel activity
TMEM272	GIYK01009958	Ssa#XM_014195706.1	ssa-miR-130a-2-3p
TMEM272	GIYK01009959	Ssa#XM_014195706.1	ssa-miR-130a-2-3p	transmembrane protein 272-like	integral component of membrane
TMEM263	GIYK01052393	Ssa#XM_014167732.1	ssa-miR-30a-1-2-5p,ssa-miR-30a-3-4-5p,ssa-miR-222a-5p,ssa-miR-30e-5p,ssa-miR-214-3-3p	transmembrane protein 263-like	integral component of membrane
TMEM258	GIYK01053951	Ssa#XM_014170405.1	ssa-miR-101b-3p,ssa-miR-1-3p,ssa-miR-222b-3p,ssa-miR-101a-3p,ssa-miR-221-3p,ssa-miR-203b-3p,ssa-miR-206-3p,ssa-miR-216c-3p	transmembrane protein 258	integral component of membrane,protein N-linked glycosylation,oligosaccharyltransferase I complex
TMEM183A	GIYK01051805	Ssa#XM_014166985.1	ssa-miR-15e-5p,ssa-miR-1-3p,ssa-miR-15d-5p,ssa-miR-457ab-5p,ssa-miR-206-3p	transmembrane protein 183A-like	integral component of membrane,protein binding
tmem181	GIYK01016822,GIYK01016821,GIYK01016823	Ssa#XM_014205642.1,Ssa#XM_014205642.1,Ssa#XM_014205642.1	ssa-miR-1-3p,ssa-miR-222a-5p,ssa-miR-novel-16-5p,ssa-miR-206-3p,ssa-miR-216c-3p,ssa-miR-novel-16-3p	transmembrane protein 181 isoform X1,transmembrane protein 181 isoform X2	integral component of membrane,toxic substance binding
TMEM176B	GIYK01061438	Ssa#XM_014171413.1	ssa-miR-15e-5p,ssa-miR-222b-3p,ssa-miR-222a-5p,ssa-miR-15d-5p,ssa-miR-221-3p,ssa-miR-457ab-5p,ssa-miR-8163-5p,ssa-miR-216c-3p	transmembrane protein 176B	integral component of membrane
tmem170a	GIYK01025382	Ssa#XM_014124193.1	ssa-miR-1-3p,ssa-miR-novel-16-5p,ssa-miR-206-3p	transmembrane protein 170A	integral component of membrane
TMEM168	GIYK01026001	Ssa#XM_014125560.1	ssa-miR-101b-3p,ssa-miR-15e-5p,ssa-miR-101a-3p,ssa-miR-205b-5p,ssa-miR-15d-5p,ssa-miR-457ab-5p,ssa-miR-214-1-2-3p,ssa-miR-216c-3p,ssa-miR-214-3-3p	transmembrane protein 168-like	integral component of membrane
TMEM165	GIYK01053209	Ssa#XM_014169003.1	ssa-miR-101b-3p,ssa-miR-101a-3p,ssa-miR-222a-5p	GDT1 family protein
TMEM161A	GIYK01023610	Ssa#XM_014216285.1	ssa-miR-8163-5p,ssa-miR-551a-3p,ssa-miR-214-3-3p,ssa-miR-200b-3p	transmembrane protein 161A-like	integral component of membrane
TMEM158	GIYK01013620	Ssa#XM_014181399.1	ssa-miR-8163-5p	transmembrane protein 158-like
tmem150c	GIYK01002589,GIYK01002590,GIYK01002592	Ssa#XM_014138585.1,Ssa#XM_014138585.1,Ssa#XM_014138585.1	ssa-miR-222b-3p,ssa-miR-200b-3p,ssa-miR-novel-13-5p,ssa-miR-221-3p,ssa-let-7e-5p,ssa-miR-214-3-3p	transmembrane protein 150C	integral component of membrane,regulation of autophagy,lysosome
TMEM150C	GIYK01002591	Ssa#XM_014138585.1	ssa-miR-222b-3p,ssa-miR-200b-3p,ssa-miR-novel-13-5p,ssa-miR-221-3p,ssa-let-7e-5p,ssa-miR-214-3-3p	transmembrane protein 150C-like
TMEM14A	GIYK01002097	Ssa#XM_014213828.1	ssa-miR-15d-5p,ssa-miR-15e-5p,ssa-miR-novel-16-3p	transmembrane protein 14A	mitochondrial transport,integral component of membrane,mitochondrial membrane
tmem138	GIYK01053948,GIYK01053949,GIYK01053946,GIYK01053950,GIYK01053947	Ssa#XM_014170405.1,Ssa#XM_014170405.1,Ssa#XM_014170405.1,Ssa#XM_014170405.1,Ssa#XM_014170405.1	ssa-miR-30a-1-2-5p,ssa-miR-30a-3-4-5p,ssa-miR-30e-5p	transmembrane protein 138	vacuolar membrane,integral component of membrane,cilium assembly,cilium
TMEM109	GIYK01018812	Ssa#XM_014195302.1	ssa-let-7b-3p,ssa-let-7j-3p	transmembrane protein 109-like	cellular response to gamma radiation,integral component of membrane,negative regulation of cell death
TMEM107	GIYK01013835,GIYK01003980	Ssa#NM_001141010.1,Ssa#NM_001141010.1	ssa-miR-455-3p	transmembrane protein 107 isoform X1,transmembrane protein 107 isoform X2	integral component of membrane
TMEM106B	GIYK01013259,GIYK01013258	Ssa#XM_014200589.1,Ssa#XM_014200589.1	ssa-miR-216c-3p,ssa-miR-20a-5p,ssa-miR-101a-3p,ssa-miR-93a-5p	transmembrane protein 106B-like	integral component of membrane
TMEM106B	GIYK01015282	Ssa#XM_014175092.1	ssa-miR-19a-2-3p	transmembrane protein 106B-like	integral component of membrane
TMEM106B	GIYK01046701,GIYK01046702,GIYK01046703	Ssa#XM_014159165.1,Ssa#XM_014159165.1,Ssa#XM_014159165.1	ssa-miR-30a-1-2-5p,ssa-miR-101b-3p,ssa-miR-101a-3p,ssa-miR-30a-3-4-5p,ssa-miR-30e-5p,ssa-miR-19a-2-3p	transmembrane protein 106B-like,Transmembrane protein 106B	integral component of membrane
TMEM104	GIYK01015010	Ssa#XM_014170219.1	ssa-miR-15e-5p,ssa-miR-1-3p,ssa-miR-206-3p,ssa-miR-146b-5p,ssa-miR-15d-5p,ssa-miR-146d-5p,ssa-miR-457ab-5p,ssa-miR-novel-16-5p,ssa-miR-146a-5p,ssa-miR-200b-3p	transmembrane protein 104	integral component of membrane
TMED7	GIYK01055323,GIYK01055322	Ssa#XM_014172529.1,Ssa#XM_014172529.1	ssa-miR-218a-5p,ssa-miR-146b-5p,ssa-miR-146d-5p,ssa-miR-146a-5p,ssa-miR-19a-2-3p	transmembrane emp24 domain-containing protein 7-like	integral component of membrane
TMED5	GIYK01053285,GIYK01053286	Ssa#XM_014169324.1,Ssa#XM_014169324.1	ssa-miR-15e-5p,ssa-miR-15d-5p,ssa-miR-457ab-5p,ssa-miR-19a-2-3p,ssa-miR-214-3-3p	transmembrane emp24 domain-containing protein 5-like	integral component of membrane
TMED5	GIYK01053287	Ssa#XM_014169324.1	ssa-miR-15e-5p,ssa-miR-15d-5p,ssa-miR-457ab-5p,ssa-miR-19a-2-3p,ssa-miR-214-3-3p
TMED4	GIYK01031759,GIYK01031760	Ssa#XM_014134417.1,Ssa#XM_014134417.1	ssa-miR-30a-1-2-5p,ssa-miR-30a-3-4-5p,ssa-miR-222b-3p	transmembrane emp24 domain-containing protein 4-like	endoplasmic reticulum membrane,integral component of membrane
TMBIM6	GIYK01030394,GIYK01030393,GIYK01030395,GIYK01030396	Ssa#NM_001141682.1,Ssa#NM_001141682.1,Ssa#NM_001141682.1,Ssa#NM_001141682.1	ssa-miR-222b-3p,ssa-miR-218a-5p,ssa-miR-106a-5p,ssa-miR-221-3p,ssa-miR-206-3p,ssa-miR-8163-5p,ssa-miR-20a-5p	probable Bax inhibitor 1 isoform X1,probable Bax inhibitor 1 isoform X2	integral component of membrane
tma7	GIYK01052754	Ssa#XM_014168243.1	ssa-miR-15e-5p,ssa-miR-15d-5p,ssa-miR-457ab-5p,ssa-miR-novel-16-3p,ssa-miR-200b-3p	translation machinery-associated protein 7	cytoplasmic translation
TM9SF2	GIYK01020997,GIYK01020996,GIYK01020994,GIYK01020995	Ssa#XM_014212230.1,Ssa#XM_014212230.1,Ssa#XM_014212230.1,Ssa#XM_014212230.1	ssa-miR-222a-5p,ssa-miR-214-3-3p,ssa-miR-novel-16-5p,ssa-miR-18bc-5p	transmembrane 9 superfamily member 2-like isoform X2,transmembrane 9 superfamily member 2-like isoform X1	integral component of membrane
TM7SF3	GIYK01043876,GIYK01043880,GIYK01043882,GIYK01018546,GIYK01043875,GIYK01018543,GIYK01018551,GIYK01043881,GIYK01043877,GIYK01018549,GIYK01018547,GIYK01018548,GIYK01018550,GIYK01043878,GIYK01018552,GIYK01018542	Ssa#XM_014153571.1,Ssa#XM_014153571.1,Ssa#XM_014153571.1,Ssa#XM_014153571.1,Ssa#XM_014153571.1,Ssa#XM_014153571.1,Ssa#XM_014208410.1,Ssa#XM_014153571.1,Ssa#XM_014153571.1,Ssa#XM_014208410.1,Ssa#XM_014208410.1,Ssa#XM_014208410.1,Ssa#XM_014208410.1,Ssa#XM_014153571.1,Ssa#XM_014208410.1,Ssa#XM_014153571.1	ssa-miR-30a-1-2-5p,ssa-miR-218a-5p,ssa-miR-93a-5p,ssa-miR-30a-3-4-5p,ssa-miR-30e-5p,ssa-miR-462b-5p,ssa-miR-214-1-2-3p,ssa-miR-216c-3p,ssa-miR-19a-2-3p,ssa-miR-214-3-3p	transmembrane 7 superfamily member 3-like	,integral component of membrane
TM7SF3	GIYK01043879	Ssa#XM_014153571.1	ssa-miR-218a-5p,ssa-miR-462b-5p,ssa-miR-214-1-2-3p,ssa-miR-216c-3p,ssa-miR-214-3-3p	transmembrane 7 superfamily member 3-like
TM7SF2	GIYK01010525,GIYK01010522,GIYK01010521,GIYK01010524,GIYK01010523	Ssa#XM_014196416.1,Ssa#XM_014196416.1,Ssa#XM_014196416.1,Ssa#XM_014196416.1,Ssa#XM_014196416.1	ssa-miR-17-5p,ssa-miR-106a-5p,ssa-miR-106b-5p,ssa-miR-93a-5p,ssa-miR-8163-5p,ssa-miR-20a-5p	delta(14)-sterol reductase	integral component of membrane,nuclear inner membrane,sterol biosynthetic process,oxidation-reduction process,integral component of endoplasmic reticulum membrane,oxidoreductase activity acting on the CH-CH group of donors NAD or NADP as acceptor
TM6SF2	GIYK01036254,GIYK01036253	Ssa#XM_014141249.1,Ssa#XM_014141249.1	ssa-miR-15d-5p,ssa-miR-15e-5p,ssa-miR-457ab-5p,ssa-miR-222a-5p	transmembrane 6 superfamily member 2-like	integral component of membrane
TM4SF4	GIYK01024676,GIYK01024675	Ssa#XM_014123632.1,Ssa#XM_014123632.1	ssa-miR-1-3p,ssa-miR-17-5p,ssa-miR-106a-5p,ssa-miR-106b-5p,ssa-miR-93a-5p,ssa-miR-221-3p,ssa-miR-206-3p	transmembrane 4 L6 family member 4	integral component of membrane
TM4SF4	GIYK01024678	Ssa#XM_014123632.1	ssa-miR-1-3p,ssa-miR-17-5p,ssa-miR-106a-5p,ssa-miR-106b-5p,ssa-miR-93a-5p,ssa-miR-221-3p,ssa-miR-206-3p	transmembrane 4 L6 family member 4-like	integral component of membrane
TM127	GIYK01048158,GIYK01048153,GIYK01048155	Ssa#XM_014160215.1,Ssa#XM_014160215.1,Ssa#XM_014160215.1	ssa-miR-novel-13-5p	Transmembrane protein 127	negative regulation of TOR signaling,integral component of membrane,negative regulation of cell population proliferation
TM127	GIYK01048156,GIYK01048157,GIYK01048154	Ssa#XM_014160215.1,Ssa#XM_014160215.1,Ssa#XM_014160215.1	ssa-miR-novel-13-5p,ssa-miR-214-1-2-3p	hypothetical protein cypCar_00000135	negative regulation of TOR signaling,negative regulation of cell population proliferation
TLE1	GIYK01064361	Ssa#XM_014172558.1	ssa-miR-novel-1-3p,ssa-miR-novel-16-5p	transducin-like enhancer protein 1 isoform X1	protein binding,nucleus,regulation of transcription DNA-templated
TLE1	GIYK01064362	Ssa#XM_014172558.1	ssa-miR-novel-1-3p,ssa-miR-novel-16-5p	transducin-like enhancer protein 1 isoform X2	protein binding,nucleus,regulation of transcription DNA-templated
TKT	GIYK01032280	Ssa#XM_014134967.1	ssa-miR-214-3-3p	Transketolase	catalytic activity
TJP3	GIYK01023602	Ssa#XM_014202048.1	ssa-miR-30a-1-2-5p,ssa-miR-222b-3p,ssa-miR-30a-3-4-5p,ssa-miR-30e-5p,ssa-miR-216c-3p,ssa-miR-200b-3p	tight junction protein ZO-3-like isoform X3	bicellular tight junction,protein binding
Tinp1	GIYK01021767,GIYK01021754,GIYK01021751,GIYK01021750,GIYK01021780,GIYK01021749,GIYK01021740,GIYK01021774,GIYK01021789,GIYK01021742,GIYK01021772,GIYK01021783,GIYK01021758,GIYK01021748,GIYK01021757,GIYK01021782,GIYK01021770,GIYK01021768,GIYK01021769,GIYK01021746,GIYK01021762,GIYK01021786,GIYK01021788,GIYK01021753,GIYK01021777,GIYK01021765,GIYK01021745,GIYK01021764,GIYK01021771,GIYK01021755,GIYK01021…	Ssa#S35670649,Ssa#XM_014198560.1,Ssa#XM_014198560.1,Ssa#XM_014198560.1,Ssa#S35670649,Ssa#XM_014198560.1,Ssa#XM_014198560.1,Ssa#S35670649,Ssa#S35670649,Ssa#XM_014198560.1,Ssa#S35670649,Ssa#S35670649,Ssa#XM_014198560.1,Ssa#XM_014198560.1,Ssa#XM_014198560.1,Ssa#S35670649,Ssa#S35670649,Ssa#S35670649,Ssa#S35670649,Ssa#XM_014198560.1,Ssa#XM_014198560.1,Ssa#S35670649,Ssa#S35670649,Ssa#XM_014198560.1,Ssa…	ssa-miR-218a-5p,ssa-miR-novel-16-3p,ssa-miR-novel-12-5p	TNFAIP3-interacting protein 1-like isoform X5,TNFAIP3-interacting protein 1-like,TNFAIP3-interacting protein 1-like isoform X17,TNFAIP3-interacting protein 1-like isoform X1,TNFAIP3-interacting protein 1-like isoform X18,TNFAIP3-interacting protein 1-like isoform X4
Tinp1	GIYK01027537	Ssa#NM_001141461.1	ssa-miR-218a-5p	ribosome biogenesis protein NSA2 homolog
TINAGL1	GIYK01037327,GIYK01037328	Ssa#XM_014142904.1,Ssa#XM_014142904.1	ssa-miR-15e-3p,ssa-miR-142b-5p	tubulointerstitial nephritis antigen-like	negative regulation of peptidase activity,peptidase inhibitor activity,cysteine-type peptidase activity
TIMM8B	GIYK01022454	Ssa#XM_014213811.1	ssa-miR-101b-3p,ssa-miR-15e-5p,ssa-miR-101a-3p,ssa-miR-15d-5p,ssa-miR-457ab-5p,ssa-miR-200b-3p	mitochondrial import inner membrane translocase subunit Tim8 B	mitochondrial intermembrane space,chaperone-mediated protein transport,metal ion binding,mitochondrial inner membrane
TIMM50	GIYK01022099,GIYK01022100,GIYK01022098	Ssa#XM_014214089.1,Ssa#XM_014214089.1,Ssa#XM_014214089.1	ssa-miR-novel-16-3p	mitochondrial import inner membrane translocase subunit TIM50 isoform X2	TIM23 mitochondrial import inner membrane translocase complex,protein transport
TIMM17B	GIYK01033153	Ssa#XM_014136276.1	ssa-miR-17-5p,ssa-miR-106a-5p,ssa-miR-106b-5p,ssa-miR-93a-5p,ssa-miR-214-3-3p,ssa-miR-20a-5p,ssa-miR-200b-3p	mitochondrial import inner membrane translocase subunit Tim17-B	integral component of membrane
TIM23	GIYK01059316,GIYK01059317	Ssa#XM_014179424.1,Ssa#XM_014179424.1	ssa-miR-216c-3p	Mitochondrial import inner membrane translocase subunit TIM23
TIM23	GIYK01059318,GIYK01059314	Ssa#XM_014179424.1,Ssa#XM_014179424.1	ssa-miR-216c-3p	mitochondrial import inner membrane translocase subunit Tim23	integral component of membrane,intracellular protein transport,TIM23 mitochondrial import inner membrane translocase complex,protein transmembrane transport,P-P-bond-hydrolysis-driven protein transmembrane transporter activity
TIM13	GIYK01041057,GIYK01023556	Ssa#XM_014148711.1,Ssa#XM_014216247.1	ssa-miR-15e-5p,ssa-miR-17-5p,ssa-miR-106a-5p,ssa-miR-106b-5p,ssa-miR-93a-5p,ssa-miR-15d-5p,ssa-miR-457ab-5p,ssa-miR-novel-16-5p,ssa-miR-8163-5p,ssa-miR-20a-5p,ssa-miR-214-3-3p	mitochondrial import inner membrane translocase subunit Tim13	mitochondrial intermembrane space,chaperone-mediated protein transport,metal ion binding,mitochondrial inner membrane
tifa	GIYK01017485,GIYK01017484	Ssa#NM_001173784.1,Ssa#NM_001173784.1	ssa-miR-8163-5p,ssa-miR-221-3p,ssa-miR-203b-3p	TRAF-interacting protein with FHA domain-containing protein A-like	I-kappaB kinase/NF-kappaB signaling,protein binding
tiar	GIYK01001237	Ssa#NM_001140407.1	ssa-miR-17-5p,ssa-miR-106a-5p,ssa-miR-106b-5p,ssa-miR-93a-5p,ssa-miR-462b-5p,ssa-miR-8163-5p,ssa-miR-20a-5p	nucleolysin TIAR-like isoform X3	nucleic acid binding
tiar	GIYK01001235	Ssa#NM_001140407.1	ssa-miR-17-5p,ssa-miR-106a-5p,ssa-miR-106b-5p,ssa-miR-93a-5p,ssa-miR-462b-5p,ssa-miR-8163-5p,ssa-miR-20a-5p	nucleolysin TIAR-like isoform X1	DNA binding,RNA binding
tiar	GIYK01001236	Ssa#NM_001140407.1	ssa-miR-17-5p,ssa-miR-106a-5p,ssa-miR-106b-5p,ssa-miR-93a-5p,ssa-miR-462b-5p,ssa-miR-8163-5p,ssa-miR-20a-5p	nucleolysin TIAR-like isoform X3	DNA binding,RNA binding
thyn1	GIYK01049603	Ssa#NM_001141660.1	ssa-miR-15d-5p,ssa-miR-15e-5p,ssa-miR-457ab-5p	thymocyte nuclear protein 1
THUM1	GIYK01028864,GIYK01028865	Ssa#XM_014185135.1,Ssa#XM_014185135.1	ssa-miR-221-3p,ssa-miR-222b-3p	THUMP domain-containing protein 1	tRNA modification,RNA binding
THUM1	GIYK01028866	Ssa#XM_014185135.1	ssa-miR-221-3p,ssa-miR-222b-3p	THUMP domain-containing protein 1	tRNA modification,RNA binding
THUM1	GIYK01028862,GIYK01028863,GIYK01028861	Ssa#XM_014214075.1,Ssa#XM_014214075.1,Ssa#XM_014185135.1	ssa-miR-222b-3p,ssa-miR-17-5p,ssa-miR-106a-5p,ssa-miR-106b-5p,ssa-miR-93a-5p,ssa-miR-221-3p,ssa-miR-30e-5p,ssa-miR-20a-5p	THUMP domain-containing protein 1	tRNA modification,RNA binding
THOC5	GIYK01048477,GIYK01048467,GIYK01048475,GIYK01048476,GIYK01048469,GIYK01048473,GIYK01048474,GIYK01048468,GIYK01048472,GIYK01048466,GIYK01048478	Ssa#XM_014161133.1,Ssa#XM_014161133.1,Ssa#XM_014161133.1,Ssa#XM_014161133.1,Ssa#XM_014161133.1,Ssa#XM_014161133.1,Ssa#XM_014161133.1,Ssa#XM_014161133.1,Ssa#XM_014161133.1,Ssa#XM_014161133.1,Ssa#XM_014161133.1	ssa-miR-146b-5p,ssa-let-7e-5p,ssa-miR-146d-5p,ssa-miR-146a-5p,ssa-miR-8163-5p	unnamed protein product,THO complex subunit 5 homolog
THOC3	GIYK01011805	Ssa#XM_014198541.1	ssa-miR-222a-5p,ssa-miR-203b-3p,ssa-miR-214-3-3p	THO complex subunit 3	protein binding,mRNA export from nucleus
THOC1	GIYK01035685,GIYK01035687	Ssa#XM_014140562.1,Ssa#XM_014140562.1	ssa-miR-15e-5p,ssa-miR-18bc-5p,ssa-miR-15d-5p,ssa-miR-457ab-5p,ssa-miR-216c-3p	THO complex subunit 1	protein binding,signal transduction
THOC1	GIYK01035686	Ssa#XM_014140562.1	ssa-miR-18bc-5p	THO complex subunit 1	protein binding,signal transduction
them6	GIYK01006388	Ssa#NM_001146461.1	ssa-miR-214-1-2-3p,ssa-miR-novel-16-5p,ssa-miR-205b-5p,ssa-miR-214-3-3p	protein THEM6-like
them6	GIYK01006386,GIYK01006385	Ssa#NM_001146461.1,Ssa#NM_001146461.1	ssa-miR-214-1-2-3p,ssa-miR-novel-16-5p,ssa-miR-205b-5p,ssa-miR-214-3-3p	protein THEM6-like	integral component of membrane
THEM5	GIYK01043380,GIYK01043374,GIYK01043375,GIYK01043378	Ssa#XM_014152870.1,Ssa#XM_014152870.1,Ssa#XM_014152870.1,Ssa#XM_014152870.1	ssa-miR-551a-3p	acyl-coenzyme A thioesterase 5-like isoform X2	acyl-CoA metabolic process,thiolester hydrolase activity
THEM2	GIYK01058960	Ssa#GRASP221219533	ssa-miR-15d-5p,ssa-miR-15e-5p,ssa-miR-457ab-5p,ssa-miR-214-3-3p	acyl-coenzyme A thioesterase 13	acyl-CoA hydrolase activity
THBS4	GIYK01054426	Ssa#XM_014170761.1	ssa-miR-205b-5p,ssa-miR-101a-3p	thrombospondin-4-B-like	cell adhesion,extracellular region,calcium ion binding
thbs3	GIYK01013558	Ssa#XM_014201085.1	ssa-miR-214-3-3p	thrombospondin-3a-like	heparin binding,cell adhesion,extracellular region,calcium ion binding
THBD	GIYK01038254	Ssa#S30239545	ssa-miR-455-3p	thrombomodulin-like	transmembrane signaling receptor activity,integral component of membrane,calcium ion binding
THADA	GIYK01054501	Ssa#XM_014170684.1	ssa-miR-15e-5p,ssa-miR-146b-5p,ssa-miR-15d-5p,ssa-miR-457ab-5p,ssa-miR-146a-5p	thyroid adenoma-associated protein homolog isoform X2
TGM2	GIYK01052721,GIYK01052718,GIYK01052719,GIYK01052717,GIYK01052720	Ssa#XM_014168240.1,Ssa#XM_014168240.1,Ssa#XM_014168240.1,Ssa#XM_014168240.1,Ssa#XM_014168240.1	ssa-miR-222b-3p,ssa-miR-153a-3p,ssa-miR-218a-5p,ssa-miR-novel-13-5p,ssa-miR-222a-5p,ssa-miR-221-3p,ssa-miR-novel-16-5p,ssa-miR-551a-3p,ssa-miR-214-3-3p	protein-glutamine gamma-glutamyltransferase 2-like	protein-glutamine gamma-glutamyltransferase activity,metal ion binding,peptide cross-linking
tgfr2	GIYK01036457	Ssa#NM_001140256.1	ssa-miR-17-5p,ssa-miR-106a-5p,ssa-miR-106b-5p,ssa-miR-93a-5p,ssa-miR-203b-3p,ssa-miR-462b-5p,ssa-miR-214-1-2-3p,ssa-miR-20a-5p	TGF-beta receptor type-2-like isoform X1	integral component of membrane,regulation of growth,transforming growth factor beta receptor activity type II,metal ion binding,ATP binding,apoptotic process,protein phosphorylation,receptor complex,cell differentiation,plasma membrane,transforming growth factor beta receptor signaling pathway
TGFBR3	GIYK01003001	Ssa#XM_014136750.1	ssa-let-7e-5p	transforming growth factor beta receptor type 3-like isoform X1	integral component of membrane
TFRC	GIYK01062518,GIYK01062519	Ssa#XM_014159435.1,Ssa#XM_014159435.1	ssa-miR-200b-3p,ssa-miR-205b-5p,ssa-miR-203b-3p,ssa-miR-novel-16-3p,ssa-miR-214-3-3p	transferrin receptor protein 1-like	integral component of membrane,receptor-mediated endocytosis,cellular iron ion homeostasis,transferrin transport,transferrin receptor activity,plasma membrane
TFRC	GIYK01006414	Ssa#XM_014216613.1	ssa-miR-221-3p,ssa-miR-222b-3p	Transferrin receptor protein 1
TFPT	GIYK01013895,GIYK01013898	Ssa#XM_014201661.1,Ssa#XM_014201661.1	ssa-miR-15a-3p	TCF3 fusion partner homolog isoform X1	apoptotic process
TFPT	GIYK01013897	Ssa#XM_014201661.1	ssa-miR-15a-3p		apoptotic process
TFPI2	GIYK01058768	Ssa#XM_014178515.1	ssa-miR-130a-2-3p	Tissue factor pathway inhibitor 2 precursor	negative regulation of endopeptidase activity,extracellular region,serine-type endopeptidase inhibitor activity,blood coagulation
TFDP1	GIYK01050503,GIYK01050499,GIYK01050504,GIYK01050502,GIYK01050501	Ssa#XM_014164570.1,Ssa#XM_014164570.1,Ssa#XM_014164570.1,Ssa#XM_014164570.1,Ssa#XM_014164570.1	ssa-miR-30a-1-2-5p,ssa-miR-30a-3-4-5p,ssa-miR-216c-3p,ssa-miR-30e-5p	transcription factor Dp-1-like isoform X2	transcription regulator complex,regulation of cell cycle,DNA binding,DNA-binding transcription factor activity,regulation of transcription DNA-templated,nucleus
TFDP1	GIYK01050500,GIYK01050498	Ssa#XM_014164570.1,Ssa#XM_014164570.1	ssa-miR-30a-1-2-5p,ssa-miR-30a-3-4-5p,ssa-miR-216c-3p,ssa-miR-30e-5p	transcription factor Dp-1-like isoform X2	transcription regulator complex,regulation of cell cycle,DNA binding,DNA-binding transcription factor activity,regulation of transcription DNA-templated,nucleus
tfb2m	GIYK01000257,GIYK01000256,GIYK01000260,GIYK01000258,GIYK01000262,GIYK01000261,GIYK01000255,GIYK01000259,GIYK01000263	Ssa#XM_014141551.1,Ssa#XM_014141551.1,Ssa#XM_014141551.1,Ssa#XM_014141551.1,Ssa#XM_014141551.1,Ssa#XM_014141551.1,Ssa#XM_014141551.1,Ssa#XM_014141551.1,Ssa#XM_014141551.1	ssa-miR-222a-5p,ssa-miR-1-3p,ssa-miR-206-3p	unnamed protein product,dimethyladenosine transferase 2, mitochondrial	rRNA (adenine-N6N6-)-dimethyltransferase activity,mitochondrion,RNA binding,rRNA methylation,regulation of transcription DNA-templated,transcription initiation from mitochondrial promoter,transcription coregulator activity
tf2l1	GIYK01050880,GIYK01050872,GIYK01050874,GIYK01050875,GIYK01050879,GIYK01050877,GIYK01050876,GIYK01050878	Ssa#NM_001173951.1,Ssa#NM_001173951.1,Ssa#NM_001173951.1,Ssa#NM_001173951.1,Ssa#NM_001173951.1,Ssa#NM_001173951.1,Ssa#NM_001173951.1,Ssa#NM_001173951.1	ssa-miR-221-3p,ssa-miR-200b-3p,ssa-miR-18bc-5p	transcription factor CP2-like protein 1 isoform X3,transcription factor CP2-like protein 1 isoform X1	regulation of transcription by RNA polymerase II,DNA-binding transcription factor activity
tf2l1	GIYK01050873	Ssa#NM_001173951.1	ssa-miR-200b-3p	transcription factor CP2-like protein 1 isoform X1	regulation of transcription by RNA polymerase II,DNA-binding transcription factor activity
TEX264	GIYK01030507,GIYK01030506	Ssa#XM_014132849.1,Ssa#XM_014132849.1	ssa-miR-101b-3p,ssa-miR-205b-5p,ssa-miR-101a-3p	testis-expressed sequence 264 protein-like	integral component of membrane
TEX261	GIYK01045455	Ssa#XM_014156200.1	ssa-miR-novel-13-5p,ssa-miR-214-3-3p	protein TEX261	integral component of membrane,cytoplasm,COPII adaptor activity,endoplasmic reticulum to Golgi vesicle-mediated transport
TENT4B	GIYK01027124	Ssa#XM_014127238.1	ssa-miR-301a-5p,ssa-miR-200b-3p	non-canonical poly(A) RNA polymerase PAPD5-like	RNA polyadenylation,RNA binding,polynucleotide adenylyltransferase activity
TEF	GIYK01015337,GIYK01008505,GIYK01008503,GIYK01008506,GIYK01015338,GIYK01015334,GIYK01008508	Ssa#XM_014203802.1,Ssa#XM_014203802.1,Ssa#XM_014203802.1,Ssa#XM_014193287.1,Ssa#XM_014203802.1,Ssa#XM_014203802.1,Ssa#XM_014203802.1	ssa-miR-222b-3p,ssa-miR-novel-13-5p,ssa-miR-18bc-5p,ssa-miR-221-3p,ssa-miR-214-1-2-3p,ssa-miR-301a-5p,ssa-miR-216c-3p	thyrotroph embryonic factor-like	regulation of transcription by RNA polymerase II,DNA-binding transcription factor activity,cellular response to light stimulus
TEF	GIYK01008504,GIYK01008507,GIYK01008509	Ssa#XM_014193287.1,Ssa#XM_014193287.1,Ssa#XM_014203802.1	ssa-miR-222b-3p,ssa-miR-18bc-5p,ssa-miR-222a-5p,ssa-miR-221-3p,ssa-miR-146d-5p,ssa-miR-214-1-2-3p,ssa-miR-301a-5p,ssa-miR-216c-3p	thyrotroph embryonic factor-like	regulation of transcription by RNA polymerase II,DNA-binding transcription factor activity
TEF	GIYK01015336	Ssa#XM_014203802.1	ssa-miR-301a-5p,ssa-miR-novel-13-5p,ssa-miR-214-1-2-3p	thyrotroph embryonic factor-like
TECPR1	GIYK01061832	Ssa#XM_014202887.1	ssa-miR-455-3p,ssa-miR-130a-2-3p	tectonin beta-propeller repeat-containing protein 1-like	integral component of membrane
TDO2	GIYK01020646,GIYK01020638	Ssa#XM_014211938.1,Ssa#XM_014211938.1	ssa-miR-101b-3p,ssa-miR-101a-3p	tryptophan 2,3-dioxygenase A-like	heme binding,metal ion binding,oxidation-reduction process,tryptophan 23-dioxygenase activity,tryptophan catabolic process to kynurenine
TDO2	GIYK01020627,GIYK01020622,GIYK01020642,GIYK01020648,GIYK01020637,GIYK01020634,GIYK01020630,GIYK01020643,GIYK01020628,GIYK01020640,GIYK01020635,GIYK01020632,GIYK01020629	Ssa#XM_014211938.1,Ssa#XM_014211938.1,Ssa#XM_014211938.1,Ssa#XM_014211938.1,Ssa#XM_014211938.1,Ssa#XM_014211938.1,Ssa#XM_014211938.1,Ssa#XM_014211938.1,Ssa#XM_014211938.1,Ssa#XM_014211938.1,Ssa#XM_014211938.1,Ssa#XM_014211938.1,Ssa#XM_014211938.1	ssa-miR-101b-3p,ssa-miR-101a-3p	tryptophan 2,3-dioxygenase A-like	heme binding,metal ion binding,tryptophan catabolic process to kynurenine,tryptophan 23-dioxygenase activity
TDO2	GIYK01020641,GIYK01020631,GIYK01020633,GIYK01020636,GIYK01020647	Ssa#XM_014211938.1,Ssa#XM_014211938.1,Ssa#XM_014211938.1,Ssa#XM_014211938.1,Ssa#XM_014211938.1	ssa-miR-15e-3p,ssa-miR-8163-3p,ssa-miR-125b-1-3p	Tryptophan 2,3-dioxygenase	oxidation-reduction process,tryptophan 23-dioxygenase activity,tryptophan catabolic process to kynurenine,heme binding,metal ion binding
TDG	GIYK01053850,GIYK01024959,GIYK01024960,GIYK01024961,GIYK01053849	Ssa#XM_014124710.1,Ssa#XM_014124710.1,Ssa#XM_014124710.1,Ssa#XM_014124710.1,Ssa#XM_014124710.1	ssa-miR-29b-1-5p,ssa-let-7j-3p	G/T mismatch-specific thymine DNA glycosylase-like isoform X2,G/T mismatch-specific thymine DNA glycosylase-like isoform X1	DNA N-glycosylase activity,DNA repair
TCTN3	GIYK01047144,GIYK01047149,GIYK01047148	Ssa#XM_014158558.1,Ssa#XM_014158558.1,Ssa#XM_014158558.1	ssa-miR-15e-5p,ssa-miR-146b-5p,ssa-miR-novel-13-5p,ssa-miR-15d-5p,ssa-miR-462b-5p,ssa-miR-146d-5p,ssa-miR-457ab-5p,ssa-miR-146a-5p,ssa-miR-216c-3p	tectonic-3
TCTA	GIYK01031329,GIYK01031328	Ssa#XM_014133702.1,Ssa#XM_014133702.1	ssa-miR-novel-16-5p	T-cell leukemia translocation-altered gene protein homolog isoform X1	integral component of membrane
tcpd	GIYK01005497,GIYK01029469,GIYK01029470	Ssa#NM_001140010.1,Ssa#NM_001140010.1,Ssa#NM_001140010.1	ssa-miR-221-3p,ssa-miR-222b-3p	T-complex protein 1 subunit delta	unfolded protein binding,protein folding,ATP binding,cytoplasm,response to hypoxia
tcpd	GIYK01005496	Ssa#NM_001140010.1	ssa-miR-221-3p,ssa-miR-222b-3p	T-complex protein 1 subunit delta	unfolded protein binding,protein folding,ATP binding,cytoplasm,response to hypoxia
TCP11	GIYK01030865	Ssa#XM_014133473.1	ssa-miR-novel-16-5p	T-complex protein 11-like protein 2
TCP1	GIYK01045677,GIYK01045676	Ssa#XM_014156650.1,Ssa#XM_014156650.1	ssa-miR-222a-5p,ssa-miR-novel-16-5p,ssa-miR-novel-13-5p,ssa-miR-122-2-3p	T-complex protein 1 subunit eta	unfolded protein binding,ATP binding,cytoplasm,protein folding
TCN2	GIYK01048357	Ssa#XM_014161243.1	ssa-miR-221-3p,ssa-miR-222b-3p,ssa-miR-214-1-2-3p,ssa-miR-214-3-3p	Transcobalamin-2	cobalamin transport,cobalamin binding
TCIM	GIYK01054227	Ssa#XM_014189520.1	ssa-miR-153a-3p	transcriptional and immune response regulator-like
TCHHL1	GIYK01054828,GIYK01054825,GIYK01054826	Ssa#XM_014171741.1,Ssa#XM_014171741.1,Ssa#XM_014171741.1	ssa-miR-15e-5p,ssa-miR-15d-5p,ssa-let-7e-5p,ssa-miR-457ab-5p,ssa-miR-214-1-2-3p,ssa-miR-216c-3p,ssa-miR-19a-2-3p,ssa-miR-122-2-3p	zinc finger CCCH domain-containing protein 13-like,unnamed protein product,RNA-binding protein 25
TCF12	GIYK01053894	Ssa#XM_014170272.1	ssa-miR-1-3p,ssa-miR-93a-5p,ssa-miR-novel-16-5p,ssa-miR-206-3p,ssa-miR-20a-5p,ssa-miR-200b-3p	transcription factor 12-like	protein dimerization activity
TCAIM	GIYK01004009	Ssa#XM_014202150.1	ssa-miR-101b-3p,ssa-miR-101a-3p,ssa-miR-17-5p,ssa-miR-106a-5p,ssa-miR-106b-5p,ssa-miR-93a-5p,ssa-miR-novel-16-5p,ssa-miR-20a-5p,ssa-miR-200b-3p	T-cell activation inhibitor, mitochondrial-like
TCAIM	GIYK01065265	Ssa#XM_014202150.1	ssa-miR-101b-3p,ssa-miR-101a-3p,ssa-miR-17-5p,ssa-miR-106a-5p,ssa-miR-106b-5p,ssa-miR-93a-5p,ssa-miR-novel-16-5p,ssa-miR-20a-5p,ssa-miR-200b-3p	T-cell activation inhibitor, mitochondrial isoform X1
TBXAS1	GIYK01040383,GIYK01040384	Ssa#NM_001165312.1,Ssa#NM_001165312.1	ssa-miR-210-1-5p	Thromboxane-A synthase	oxidation-reduction process,oxidoreductase activity acting on paired donors with incorporation or reduction of molecular oxygen,monooxygenase activity,integral component of membrane,heme binding,iron ion binding
TBRG4	GIYK01004591	Ssa#XM_014201063.1	ssa-miR-301a-5p,ssa-miR-novel-16-3p,ssa-miR-novel-16-5p	FAST kinase domain-containing protein 4-like	protein kinase activity,regulation of mitochondrial mRNA stability,protein phosphorylation
TBRG4	GIYK01013571,GIYK01013566,GIYK01013569,GIYK01013570	Ssa#XM_014201063.1,Ssa#XM_014201063.1,Ssa#XM_014201063.1,Ssa#XM_014201063.1	ssa-miR-8163-3p,ssa-miR-455-3p,ssa-miR-125b-1-3p	protein TBRG4-like	regulation of mitochondrial mRNA stability
tbl1xr1	GIYK01024022,GIYK01053390,GIYK01053383,GIYK01053385,GIYK01053389,GIYK01024016,GIYK01024026,GIYK01053382,GIYK01024025,GIYK01024019,GIYK01053392,GIYK01024013,GIYK01024023,GIYK01024021,GIYK01053386	Ssa#XM_014216740.1,Ssa#XM_014216740.1,Ssa#XM_014216740.1,Ssa#XM_014216740.1,Ssa#XM_014216740.1,Ssa#XM_014216740.1,Ssa#XM_014216740.1,Ssa#XM_014216740.1,Ssa#XM_014216740.1,Ssa#XM_014216740.1,Ssa#XM_014216740.1,Ssa#XM_014216740.1,Ssa#XM_014216740.1,Ssa#XM_014216740.1,Ssa#XM_014199356.1	ssa-miR-218a-5p,ssa-miR-17-5p,ssa-miR-106a-5p,ssa-miR-106b-5p,ssa-miR-93a-5p,ssa-miR-214-1-2-3p,ssa-miR-206-3p,ssa-miR-20a-5p,ssa-miR-214-3-3p	F-box-like/WD repeat-containing protein TBL1XR1 isoform X1,F-box-like/WD repeat-containing protein TBL1XR1,F-box-like/WD repeat-containing protein TBL1XR1a	regulation of transcription by RNA polymerase II,histone deacetylation,transcription corepressor activity,histone deacetylase complex,protein binding,negative regulation of nucleic acid-templated transcription
tbl1xr1	GIYK01053387,GIYK01053384,GIYK01053391,GIYK01053388	Ssa#XM_014216740.1,Ssa#XM_014216740.1,Ssa#XM_014216740.1,Ssa#XM_014216740.1	ssa-miR-214-3-3p,ssa-miR-206-3p	F-box-like/WD repeat-containing protein TBL1XR1 isoform X1	protein binding
tbl1xr1	GIYK01024015,GIYK01024017,GIYK01024018,GIYK01024024,GIYK01024020,GIYK01024014	Ssa#XM_014216740.1,Ssa#XM_014216740.1,Ssa#XM_014216740.1,Ssa#XM_014216740.1,Ssa#XM_014216740.1,Ssa#XM_014216740.1	ssa-miR-17-5p,ssa-miR-106a-5p,ssa-miR-106b-5p,ssa-miR-93a-5p,ssa-miR-20a-5p,ssa-miR-214-3-3p	F-box-like/WD repeat-containing protein TBL1XR1 isoform X1	protein binding
TBCE	GIYK01022146	Ssa#XM_014214075.1	ssa-miR-101b-3p,ssa-miR-101a-3p,ssa-miR-novel-16-5p,ssa-miR-216c-3p,ssa-miR-214-3-3p	tubulin-specific chaperone cofactor E-like protein isoform X1	protein binding
TBC1D10A	GIYK01028098	Ssa#XM_014181732.1	ssa-miR-17-5p,ssa-miR-106a-5p,ssa-miR-106b-5p,ssa-miR-93a-5p,ssa-miR-214-1-2-3p,ssa-miR-20a-5p,ssa-miR-214-3-3p	TBC1 domain family member 10A-like isoform X2
TBB1	GIYK01054893,GIYK01047963,GIYK01054884,GIYK01054887,GIYK01047962,GIYK01054886,GIYK01047961	Ssa#XM_014212152.1,Ssa#XM_014212152.1,Ssa#XM_014212152.1,Ssa#XM_014212152.1,Ssa#XM_014212152.1,Ssa#XM_014212152.1,Ssa#XM_014212152.1	ssa-miR-200b-3p	tubulin beta-1 chain	microtubule-based process,GTP binding,cytoplasm,microtubule,cytoskeleton organization,structural constituent of cytoskeleton,GTPase activity
TBB1	GIYK01054890	Ssa#XM_014212152.1	ssa-miR-200b-3p	tubulin beta-1 chain	microtubule-based process,GTP binding,cytoplasm,microtubule,cytoskeleton organization,structural constituent of cytoskeleton,GTPase activity
TBB1	GIYK01054885	Ssa#XM_014212152.1	ssa-miR-200b-3p	tubulin beta-1 chain	microtubule-based process,GTP binding,cytoplasm,microtubule,cytoskeleton organization,structural constituent of cytoskeleton,GTPase activity
TBB1	GIYK01054891	Ssa#XM_014212152.1	ssa-miR-1-3p,ssa-miR-206-3p,ssa-miR-200b-3p	putative tubulin beta 2	microtubule-based process,GTP binding,cytoplasm,microtubule,cytoskeleton organization,structural constituent of cytoskeleton,GTPase activity
TBB1	GIYK01054883,GIYK01047960	Ssa#XM_014212152.1,Ssa#XM_014212152.1	ssa-miR-200b-3p	tubulin beta-1 chain	microtubule-based process,GTP binding,cytoplasm,microtubule,cytoskeleton organization,structural constituent of cytoskeleton,GTPase activity
TAX1BP3	GIYK01041068	Ssa#XM_014148687.1	ssa-miR-221-3p,ssa-miR-222b-3p,ssa-miR-novel-16-5p,ssa-miR-18bc-5p	tax1-binding protein 3	convergent extension involved in axis elongation,nucleus,Wnt signaling pathway,cytoplasm,protein binding,plasma membrane
TAT	GIYK01025291,GIYK01025281,GIYK01025299,GIYK01025271,GIYK01025292,GIYK01025276,GIYK01025280,GIYK01025275,GIYK01025301,GIYK01025287,GIYK01025279,GIYK01025273,GIYK01025306,GIYK01025270,GIYK01025286,GIYK01025296,GIYK01025288,GIYK01025278,GIYK01025298,GIYK01025304,GIYK01025290,GIYK01025285,GIYK01025305	Ssa#XM_014124294.1,Ssa#XM_014124294.1,Ssa#XM_014124294.1,Ssa#XM_014124294.1,Ssa#XM_014124294.1,Ssa#XM_014124294.1,Ssa#XM_014124294.1,Ssa#XM_014124294.1,Ssa#XM_014124294.1,Ssa#XM_014124294.1,Ssa#XM_014124294.1,Ssa#XM_014124294.1,Ssa#XM_014124294.1,Ssa#XM_014124294.1,Ssa#XM_014124294.1,Ssa#XM_014124294.1,Ssa#XM_014124294.1,Ssa#XM_014124294.1,Ssa#XM_014124294.1,Ssa#XM_014124294.1,Ssa#XM_014124294.1,…	ssa-miR-novel-12-5p,ssa-miR-222a-5p,ssa-miR-216c-3p,ssa-miR-200b-3p	tyrosine aminotransferase-like	catalytic activity,biosynthetic process,cellular amino acid metabolic process,transaminase activity,pyridoxal phosphate binding
TAT	GIYK01025272,GIYK01025303,GIYK01025289,GIYK01025295,GIYK01025269,GIYK01025282,GIYK01025274	Ssa#XM_014124294.1,Ssa#XM_014124294.1,Ssa#XM_014124294.1,Ssa#XM_014124294.1,Ssa#XM_014124294.1,Ssa#XM_014124294.1,Ssa#XM_014124294.1	ssa-miR-200b-3p	tyrosine aminotransferase-like	L-tyrosine:2-oxoglutarate aminotransferase activity,pyridoxal phosphate binding,biosynthetic process,L-phenylalanine catabolic process
TAT	GIYK01025300	Ssa#XM_014124294.1	ssa-miR-222a-5p,ssa-miR-216c-3p,ssa-miR-200b-3p	tyrosine aminotransferase-like	L-tyrosine:2-oxoglutarate aminotransferase activity,pyridoxal phosphate binding,biosynthetic process,L-phenylalanine catabolic process
TARDBP	GIYK01031364	Ssa#NM_001141505.1	ssa-miR-8163-5p	TAR DNA-binding protein 43-like	blood vessel morphogenesis,skeletal muscle tissue development,neuromuscular junction development,RNA binding,locomotory behavior,DNA binding,axon extension
TARDBP	GIYK01031365,GIYK01031366,GIYK01031356,GIYK01031358,GIYK01031362	Ssa#NM_001141505.1,Ssa#NM_001141505.1,Ssa#NM_001141505.1,Ssa#NM_001141505.1,Ssa#NM_001141505.1	ssa-miR-8163-5p	TAR DNA-binding protein 43-like	blood vessel morphogenesis,skeletal muscle tissue development,nuclear speck,regulation of alternative mRNA splicing via spliceosome,neuromuscular junction development,RNA binding,locomotory behavior,DNA binding,axon extension,mRNA binding,mRNA cis splicing via spliceosome
TARDBP	GIYK01031367	Ssa#NM_001141505.1	ssa-miR-8163-5p	TAR DNA-binding protein 43	DNA binding,RNA binding
TARDBP	GIYK01031359,GIYK01031357,GIYK01031363	Ssa#NM_001141505.1,Ssa#NM_001141505.1,Ssa#NM_001141505.1	ssa-miR-15d-5p,ssa-miR-15e-5p,ssa-miR-457ab-5p,ssa-miR-8163-5p	TAR DNA-binding protein 43-like isoform X2,TAR DNA-binding protein 43 isoform X2	RNA binding
TARDBP	GIYK01032700,GIYK01032701	Ssa#XM_014135663.1,Ssa#XM_014135663.1	ssa-miR-146b-5p,ssa-miR-146d-5p,ssa-miR-214-1-2-3p,ssa-miR-146a-5p,ssa-miR-214-3-3p	TAR DNA-binding protein 43 isoform X1	blood vessel morphogenesis,skeletal muscle tissue development,neuromuscular junction development,RNA binding,locomotory behavior,DNA binding,axon extension
TAPBPL	GIYK01022150,GIYK01022149	Ssa#XM_014214065.1,Ssa#XM_014214065.1	ssa-miR-101b-3p,ssa-let-7e-5p,ssa-miR-101a-3p	tapasin-related protein-like isoform X1	integral component of membrane
TAP2	GIYK01046774	Ssa#XM_014213929.1	ssa-miR-200b-3p	antigen peptide transporter 2-like	integral component of membrane,ATPase-coupled transmembrane transporter activity,ATP binding,ATPase activity,transmembrane transport
TAP2	GIYK01046773	Ssa#XM_014213929.1	ssa-miR-210-1-5p	antigen peptide transporter 2-like	ATPase-coupled transmembrane transporter activity,transmembrane transport,ATP binding,ATPase activity,integral component of membrane
tap1	GIYK01013305	Ssa#NM_001123673.1	ssa-miR-15e-5p,ssa-miR-15d-5p,ssa-miR-457ab-5p,ssa-miR-301a-5p,ssa-miR-novel-16-3p		TAP2 binding,antigen processing and presentation of exogenous peptide antigen via MHC class I TAP-dependent,ATP binding,ATPase-coupled peptide antigen transmembrane transporter activity,TAP complex,transmembrane transport,MHC protein binding
TAP1	GIYK01013304	Ssa#NM_001123673.1	ssa-miR-130a-2-3p	antigen peptide transporter 1	antigen processing and presentation of exogenous peptide antigen via MHC class I TAP-dependent,MHC protein binding,transmembrane transport,TAP complex,ATP binding,peptide transport,ATPase-coupled peptide antigen transmembrane transporter activity,ATPase activity,TAP2 binding
TANC2	GIYK01015307	Ssa#XM_014203857.1	ssa-miR-301a-5p,ssa-miR-551a-3p,ssa-miR-214-3-3p	protein TANC2-like isoform	protein binding
Tamalin	GIYK01033084,GIYK01033087,GIYK01033085,GIYK01033086	Ssa#XM_014136193.1,Ssa#XM_014136193.1,Ssa#XM_014136193.1,Ssa#XM_014136193.1	ssa-miR-218a-5p,ssa-miR-15d-5p,ssa-miR-457ab-5p,ssa-miR-214-1-2-3p,ssa-miR-206-3p,ssa-miR-novel-16-3p,ssa-miR-19a-2-3p	general receptor for phosphoinositides 1-associated scaffold protein-like	integral component of membrane,protein binding
TALDO	GIYK01057545	Ssa#XM_014176417.1	ssa-miR-1-3p,ssa-miR-206-3p	PREDICTED: transaldolase-like, partial	pentose-phosphate shunt,cytoplasm,sedoheptulose-7-phosphate:D-glyceraldehyde-3-phosphate glyceronetransferase activity,carbohydrate metabolic process
TALDO	GIYK01057458,GIYK01057456,GIYK01057459,GIYK01057546,GIYK01057544	Ssa#XM_014176417.1,Ssa#XM_014176417.1,Ssa#XM_014176417.1,Ssa#XM_014176417.1,Ssa#XM_014176417.1	ssa-miR-1-3p,ssa-miR-214-1-2-3p,ssa-miR-206-3p	transaldolase,Transaldolase	pentose-phosphate shunt,cytoplasm,sedoheptulose-7-phosphate:D-glyceraldehyde-3-phosphate glyceronetransferase activity,carbohydrate metabolic process
TAL1	GIYK01006134,GIYK01006133	Ssa#XM_014180535.1,Ssa#XM_014180535.1	ssa-miR-15e-5p,ssa-miR-146b-5p,ssa-miR-15d-5p,ssa-miR-146d-5p,ssa-miR-457ab-5p,ssa-miR-146a-5p,ssa-miR-214-3-3p	T-cell acute lymphocytic leukemia protein 1 homolog	protein dimerization activity
TAL1	GIYK01006176	Ssa#XM_014180535.1	ssa-miR-15e-5p,ssa-miR-146b-5p,ssa-miR-15d-5p,ssa-miR-457ab-5p,ssa-miR-146a-5p,ssa-miR-214-3-3p	T-cell acute lymphocytic leukemia protein 1-like	protein dimerization activity
tagln3	GIYK01047304	Ssa#XM_014159541.1	ssa-miR-101b-3p,ssa-miR-101a-3p,ssa-miR-146b-5p,ssa-miR-novel-13-5p,ssa-miR-novel-1-3p,ssa-miR-146d-5p,ssa-miR-214-1-2-3p,ssa-miR-457ab-5p,ssa-miR-214-3-3p,ssa-miR-novel-16-3p,ssa-miR-200b-3p	mycophenolic acid acyl-glucuronide esterase, mitochondrial-like
TAGL	GIYK01049122,GIYK01049125,GIYK01049120	Ssa#XM_014162282.1,Ssa#XM_014162282.1,Ssa#XM_014162282.1	ssa-miR-101a-3p	Transgelin	protein binding
taf6l	GIYK01045132	Ssa#NM_001173801.1	ssa-let-7e-5p,ssa-miR-novel-13-5p,ssa-miR-222a-5p	TAF6-like RNA polymerase II p300/CBP-associated factor-associated factor 65 kDa subunit 6L	regulation of transcription by RNA polymerase II,transcription initiation from RNA polymerase II promoter,SAGA complex,transcription factor TFIID complex,RNA polymerase II general transcription initiation factor activity,protein heterodimerization activity,SLIK (SAGA-like) complex
TAF12	GIYK01012858,GIYK01012857,GIYK01012859	Ssa#XM_014200160.1,Ssa#XM_014200160.1,Ssa#XM_014200160.1	ssa-miR-200b-3p	Transcription initiation factor TFIID subunit 12	SAGA complex,translational initiation,transcription factor TFIID complex,DNA-templated transcription initiation,protein heterodimerization activity,translation initiation factor activity,SLIK (SAGA-like) complex
TAF10	GIYK01032691,GIYK01032690	Ssa#XM_014135660.1,Ssa#XM_014135660.1	ssa-miR-novel-10-3p	Transcription initiation factor TFIID subunit 10	DNA-templated transcription initiation,nucleus,translation initiation factor activity,translational initiation
TADA3	GIYK01051643,GIYK01051641,GIYK01051644,GIYK01051642	Ssa#XM_014166551.1,Ssa#XM_014166551.1,Ssa#XM_014166551.1,Ssa#XM_014166551.1	ssa-miR-221-3p,ssa-miR-222b-3p	transcriptional adapter 3
TADA3	GIYK01063636,GIYK01063635	Ssa#XM_014166551.1,Ssa#XM_014166551.1	ssa-miR-221-3p,ssa-miR-222b-3p	transcriptional adapter 3
TACR3	GIYK01062329	Ssa#XM_014195510.1	ssa-miR-101a-3p	neuromedin-K receptor	tachykinin receptor activity,plasma membrane,tachykinin receptor signaling pathway,integral component of membrane
TACC3	GIYK01019976,GIYK01019971,GIYK01019969,GIYK01019973,GIYK01019977,GIYK01019970	Ssa#XM_014210755.1,Ssa#XM_014210755.1,Ssa#XM_014210755.1,Ssa#XM_014210755.1,Ssa#XM_014210755.1,Ssa#XM_014210755.1	ssa-miR-15d-5p,ssa-miR-15e-5p,ssa-miR-457ab-5p,ssa-miR-novel-16-3p	transforming acidic coiled-coil-containing protein 3-like isoform X1	mitotic spindle organization
TACC3	GIYK01019972,GIYK01019978,GIYK01019974	Ssa#XM_014210755.1,Ssa#XM_014210755.1,Ssa#XM_014210755.1	ssa-miR-15e-5p,ssa-miR-17-5p,ssa-miR-106a-5p,ssa-miR-106b-5p,ssa-miR-93a-5p,ssa-miR-15d-5p,ssa-miR-457ab-5p,ssa-miR-8163-5p,ssa-miR-20a-5p	unnamed protein product	mitotic spindle organization
TACC3	GIYK01019975	Ssa#XM_014210755.1	ssa-miR-15d-5p,ssa-miR-15e-5p,ssa-miR-457ab-5p	transforming acidic coiled-coil-containing protein 3	mitotic spindle organization
SYTL4	GIYK01021070,GIYK01021073,GIYK01021071,GIYK01021072,GIYK01021069,GIYK01021074,GIYK01021068	Ssa#XM_014212197.1,Ssa#XM_014212197.1,Ssa#XM_014212197.1,Ssa#XM_014212197.1,Ssa#XM_014212197.1,Ssa#XM_014212197.1,Ssa#XM_014212197.1	ssa-miR-130a-2-3p	synaptotagmin-like protein 4 isoform X1	membrane,intracellular protein transport,Rab GTPase binding,exocytosis
SYS1	GIYK01030325,GIYK01030328	Ssa#XM_014132491.1,Ssa#XM_014132491.1	ssa-miR-153a-3p,ssa-miR-218a-5p,ssa-miR-222a-5p	Protein SYS1 homolog
SYS1	GIYK01030324,GIYK01030329,GIYK01030331,GIYK01030326,GIYK01030321	Ssa#XM_014132491.1,Ssa#XM_014132491.1,Ssa#XM_014132491.1,Ssa#XM_014132491.1,Ssa#XM_014132491.1	ssa-miR-153a-3p,ssa-miR-218a-5p,ssa-miR-222a-5p	protein SYS1 homolog	integral component of membrane,Golgi membrane,protein transport
SYS1	GIYK01030322,GIYK01030327,GIYK01030330,GIYK01030323	Ssa#XM_014132491.1,Ssa#XM_014132491.1,Ssa#XM_014132491.1,Ssa#XM_014132491.1	ssa-miR-153a-3p,ssa-miR-218a-5p,ssa-miR-222a-5p	protein SYS1 homolog	integral component of membrane,Golgi membrane,protein transport
SYNGR2	GIYK01028924,GIYK01006273,GIYK01028930,GIYK01006271,GIYK01006275,GIYK01028925,GIYK01028928,GIYK01006274,GIYK01006272,GIYK01028932,GIYK01028927	Ssa#XM_014183327.1,Ssa#XM_014183327.1,Ssa#XM_014183327.1,Ssa#XM_014183327.1,Ssa#XM_014183327.1,Ssa#XM_014183327.1,Ssa#XM_014183327.1,Ssa#XM_014183327.1,Ssa#XM_014183327.1,Ssa#XM_014183327.1,Ssa#XM_014183327.1	ssa-miR-218a-5p,ssa-miR-462b-5p,ssa-miR-novel-16-5p,ssa-miR-novel-16-3p,ssa-miR-19a-2-3p	synaptogyrin-2-like	integral component of membrane,membrane
SYNGR2	GIYK01028935,GIYK01028938	Ssa#XM_014183327.1,Ssa#XM_014183327.1	ssa-miR-novel-16-5p,ssa-miR-218a-5p,ssa-miR-novel-16-3p,ssa-miR-19a-2-3p	synaptogyrin-2-like	membrane
SYNGR2	GIYK01028937	Ssa#XM_014183327.1	ssa-miR-novel-16-3p,ssa-miR-novel-16-5p	synaptogyrin-2-like	integral component of membrane
SYNCRIP	GIYK01019525,GIYK01019523,GIYK01019524,GIYK01019522	Ssa#XM_014210163.1,Ssa#XM_014210163.1,Ssa#XM_014210163.1,Ssa#XM_014210163.1	ssa-let-7e-5p,ssa-miR-novel-16-3p	heterogeneous nuclear ribonucleoprotein Q isoform X3,heterogeneous nuclear ribonucleoprotein Q isoform X1	RNA binding
SYNCRIP	GIYK01000212,GIYK01000214,GIYK01000213,GIYK01000215,GIYK01000216	Ssa#XM_014210163.1,Ssa#XM_014210163.1,Ssa#XM_014210163.1,Ssa#XM_014210163.1,Ssa#XM_014210163.1	ssa-let-7e-5p,ssa-miR-301a-5p	heterogeneous nuclear ribonucleoprotein Q isoform X4,heterogeneous nuclear ribonucleoprotein Q isoform X2,heterogeneous nuclear ribonucleoprotein Q-like isoform X3	RNA binding
SYNCRIP	GIYK01016174,GIYK01016175	Ssa#XM_014204941.1,Ssa#XM_014204941.1	ssa-miR-novel-10-3p	heterogeneous nuclear ribonucleoprotein Q-like isoform X2	RNA binding
syfb	GIYK01022943	Ssa#NM_001139817.1	ssa-miR-101b-3p,ssa-miR-15e-5p,ssa-miR-101a-3p,ssa-miR-222a-5p,ssa-miR-15d-5p,ssa-miR-457ab-5p,ssa-miR-214-1-2-3p,ssa-miR-214-3-3p	unnamed protein product	RNA binding,phenylalanine-tRNA ligase activity
syfb	GIYK01022944,GIYK01022941	Ssa#NM_001139817.1,Ssa#XM_014212475.1	ssa-miR-101b-3p,ssa-miR-214-1-2-3p,ssa-miR-101a-3p	phenylalanine--tRNA ligase beta subunit	ATP binding,cytoplasm,RNA binding,magnesium ion binding,phenylalanyl-tRNA aminoacylation,phenylalanine-tRNA ligase activity
syfa	GIYK01015186	Ssa#NM_001140149.1	ssa-miR-101b-3p,ssa-miR-101a-3p,ssa-miR-17-5p,ssa-miR-106a-5p,ssa-miR-93a-5p,ssa-miR-novel-13-5p,ssa-miR-8163-5p,ssa-miR-20a-5p	phenylalanine--tRNA ligase alpha subunit	ATP binding,cytoplasm,tRNA binding,phenylalanyl-tRNA aminoacylation,phenylalanine-tRNA ligase activity
syfa	GIYK01015187	Ssa#NM_001140149.1	ssa-miR-101b-3p,ssa-miR-101a-3p		ATP binding,cytoplasm,tRNA binding,phenylalanyl-tRNA aminoacylation,phenylalanine-tRNA ligase activity
sydc	GIYK01055531,GIYK01055534,GIYK01055541,GIYK01055537,GIYK01055539	Ssa#NM_001140539.1,Ssa#NM_001140539.1,Ssa#NM_001140539.1,Ssa#NM_001140539.1,Ssa#NM_001140539.1	ssa-miR-novel-12-5p,ssa-miR-214-3-3p,ssa-miR-216c-3p,ssa-miR-200b-3p	aspartate--tRNA ligase, cytoplasmic-like	nucleic acid binding,ATP binding,cytoplasm,aspartyl-tRNA aminoacylation,aspartate-tRNA ligase activity
sydc	GIYK01055533,GIYK01055529,GIYK01055532,GIYK01055528	Ssa#NM_001140539.1,Ssa#NM_001140539.1,Ssa#NM_001140539.1,Ssa#NM_001140539.1	ssa-miR-216c-3p,ssa-miR-214-3-3p	aspartate--tRNA ligase, cytoplasmic-like	nucleic acid binding,ATP binding,cytoplasm,aspartyl-tRNA aminoacylation,aspartate-tRNA ligase activity
sydc	GIYK01055536,GIYK01055538,GIYK01055535,GIYK01055530,GIYK01055540	Ssa#NM_001140539.1,Ssa#NM_001140539.1,Ssa#NM_001140539.1,Ssa#NM_001140539.1,Ssa#NM_001140539.1	ssa-miR-216c-3p,ssa-miR-214-3-3p	unnamed protein product	ATP binding,cytoplasm,aspartyl-tRNA aminoacylation,aspartate-tRNA ligase activity
syap1	GIYK01042215,GIYK01042214,GIYK01042213	Ssa#XM_014150876.1,Ssa#XM_014150876.1,Ssa#XM_014150876.1	ssa-miR-15e-5p,ssa-miR-205b-5p,ssa-miR-15d-5p,ssa-miR-457ab-5p,ssa-miR-206-3p	Synapse-associated protein 1
syap1	GIYK01043258,GIYK01043259	Ssa#XM_014184509.1,Ssa#XM_014184509.1	ssa-miR-15e-5p,ssa-miR-205b-5p,ssa-miR-15d-5p,ssa-miR-457ab-5p,ssa-miR-206-3p	synapse-associated protein 1
SVIL	GIYK01015799	Ssa#XM_014203990.1	ssa-miR-205b-5p	supervillin-like	cytoskeleton organization,actin filament binding
SUSD2	GIYK01037487,GIYK01037484,GIYK01037486	Ssa#XM_014143341.1,Ssa#XM_014143341.1,Ssa#XM_014143341.1	ssa-miR-221-3p,ssa-miR-222b-3p,ssa-miR-205b-5p	sushi domain-containing protein 2-like	integral component of membrane
SUSD2	GIYK01037485,GIYK01037488	Ssa#XM_014143341.1,Ssa#XM_014143341.1	ssa-miR-221-3p,ssa-miR-222b-3p,ssa-miR-205b-5p	sushi domain-containing protein 2-like
SUSD1	GIYK01055034,GIYK01055106,GIYK01055088,GIYK01055105,GIYK01055035,GIYK01055033,GIYK01055018,GIYK01055114,GIYK01055013,GIYK01055121,GIYK01055015,GIYK01055103,GIYK01055019,GIYK01068401,GIYK01055038,GIYK01055039	Ssa#XM_014171503.1,Ssa#XM_014171503.1,Ssa#XM_014171503.1,Ssa#XM_014171503.1,Ssa#XM_014171503.1,Ssa#XM_014171503.1,Ssa#XM_014171503.1,Ssa#XM_014171503.1,Ssa#XM_014171503.1,Ssa#XM_014171503.1,Ssa#XM_014171503.1,Ssa#XM_014171503.1,Ssa#XM_014171503.1,Ssa#XM_014171503.1,Ssa#XM_014171503.1,Ssa#XM_014171503.1	ssa-miR-101b-3p,ssa-miR-101a-3p,ssa-miR-205b-5p,ssa-miR-203b-3p,ssa-miR-214-1-2-3p,ssa-miR-216c-3p	sushi domain-containing protein 1-like isoform X1,sushi domain-containing protein 1 isoform X9,sushi domain-containing protein 1-like isoform X5,sushi, von Willebrand factor type A, EGF and pentraxin domain-containing protein 1-like isoform X10,sushi domain-containing protein 1-like isoform X8	,integral component of membrane,membrane,calcium ion binding
SUSD1	GIYK01055113,GIYK01055024,GIYK01055026,GIYK01055115,GIYK01055022,GIYK01055037,GIYK01055094	Ssa#XM_014171503.1,Ssa#XM_014171503.1,Ssa#XM_014171503.1,Ssa#XM_014171503.1,Ssa#XM_014171503.1,Ssa#XM_014171503.1,Ssa#XM_014171503.1	ssa-miR-214-1-2-3p,ssa-miR-203b-3p,ssa-miR-205b-5p,ssa-miR-222a-5p	sushi domain-containing protein 1-like	,calcium ion binding
SURF4	GIYK01003030	Ssa#XM_014135802.1	ssa-miR-101a-3p,ssa-miR-17-5p,ssa-miR-106a-5p,ssa-miR-106b-5p,ssa-miR-93a-5p,ssa-miR-301a-5p,ssa-miR-20a-5p,ssa-miR-214-3-3p	surfeit locus protein 4	integral component of membrane
SURF4	GIYK01003031	Ssa#XM_014135802.1	ssa-miR-101a-3p,ssa-miR-17-5p,ssa-miR-106a-5p,ssa-miR-106b-5p,ssa-miR-93a-5p,ssa-miR-301a-5p,ssa-miR-20a-5p,ssa-miR-214-3-3p	surfeit locus protein 4	integral component of membrane
suox	GIYK01052136,GIYK01052139,GIYK01052137,GIYK01052138,GIYK01052140	Ssa#XM_014167251.1,Ssa#XM_014167251.1,Ssa#XM_014167251.1,Ssa#XM_014167251.1,Ssa#XM_014167251.1	ssa-miR-17-5p,ssa-miR-106a-5p,ssa-miR-106b-5p,ssa-miR-93a-5p,ssa-miR-146b-5p,ssa-miR-146d-5p,ssa-miR-146a-5p,ssa-miR-20a-5p,ssa-miR-19a-2-3p	sulfite oxidase, mitochondrial isoform X2	oxidation-reduction process,heme binding,molybdenum ion binding,oxidoreductase activity
SUN1	GIYK01059088,GIYK01059111,GIYK01059096,GIYK01059153,GIYK01059094,GIYK01059101,GIYK01059106,GIYK01059114,GIYK01059126,GIYK01059138,GIYK01059155,GIYK01059110,GIYK01059127,GIYK01059131,GIYK01059118,GIYK01059145,GIYK01059112,GIYK01059090,GIYK01059152,GIYK01059130,GIYK01059116,GIYK01059092,GIYK01059143,GIYK01059100,GIYK01059148,GIYK01059146,GIYK01059115,GIYK01059125,GIYK01059135,GIYK01059139,GIYK01059…	Ssa#XM_014179209.1,Ssa#XM_014179209.1,Ssa#XM_014179209.1,Ssa#XM_014179209.1,Ssa#XM_014179209.1,Ssa#XM_014179209.1,Ssa#XM_014179209.1,Ssa#XM_014179209.1,Ssa#XM_014179209.1,Ssa#XM_014179209.1,Ssa#XM_014179209.1,Ssa#XM_014179209.1,Ssa#XM_014179209.1,Ssa#XM_014179209.1,Ssa#XM_014179209.1,Ssa#XM_014179209.1,Ssa#XM_014179209.1,Ssa#XM_014179209.1,Ssa#XM_014179209.1,Ssa#XM_014179209.1,Ssa#XM_014179209.1,…	ssa-miR-214-1-2-3p,ssa-miR-200b-3p	SUN domain-containing protein 1-like isoform X12,SUN domain-containing protein 1-like isoform X13,SUN domain-containing protein 1-like isoform X9,SUN domain-containing protein 1-like isoform X8,SUN domain-containing protein 1-like isoform X10,SUN domain-containing protein 1 isoform X8,SUN domain-containing protein 1-like isoform X11,SUN domain-containing protein 1-like isoform X7,SUN domain-conta…	meiotic nuclear membrane microtubule tethering complex,integral component of nuclear inner membrane
SULT1A3	GIYK01004544,GIYK01004543,GIYK01004542	Ssa#XM_014159130.1,Ssa#XM_014159130.1,Ssa#XM_014159130.1	ssa-miR-8163-3p	amine sulfotransferase-like isoform X1	sulfotransferase activity
SUFU	GIYK01044156,GIYK01044155	Ssa#XM_014154331.1,Ssa#XM_014154331.1	ssa-miR-novel-16-3p,ssa-miR-146b-5p,ssa-miR-146a-5p	suppressor of fused homolog isoform X1	fin development,cytoplasm,hemopoiesis,negative regulation of smoothened signaling pathway,lens development in camera-type eye,transcription factor binding,Hedgehog signaling complex,nucleus,zinc ion binding
SUFU	GIYK01044157	Ssa#XM_014154331.1	ssa-miR-novel-16-3p,ssa-miR-146b-5p,ssa-miR-146a-5p	suppressor of fused homolog isoform X1	fin development,cytoplasm,hemopoiesis,negative regulation of smoothened signaling pathway,lens development in camera-type eye,transcription factor binding,Hedgehog signaling complex,nucleus,zinc ion binding
stxbp3	GIYK01024399	Ssa#XM_014123351.1	ssa-miR-8163-5p,ssa-miR-146d-5p,ssa-miR-146b-5p,ssa-miR-146a-5p	syntaxin-binding protein 3	vesicle docking involved in exocytosis
stx10	GIYK01063443,GIYK01063444	Ssa#NM_001140143.1,Ssa#NM_001140143.1	ssa-miR-novel-16-5p,ssa-miR-205b-5p	Syntaxin-10	integral component of membrane,cytosol,Golgi vesicle transport,vesicle fusion,intracellular protein transport,retrograde transport endosome to Golgi,vesicle docking,SNARE binding,SNARE complex,integral component of synaptic vesicle membrane,SNAP receptor activity
stub1	GIYK01046959,GIYK01046960,GIYK01046958	Ssa#XM_014158881.1,Ssa#XM_014158881.1,Ssa#XM_014158881.1	ssa-miR-101b-3p,ssa-miR-101a-3p,ssa-miR-17-5p,ssa-miR-106a-5p,ssa-miR-106b-5p,ssa-miR-93a-5p,ssa-miR-20a-5p,ssa-miR-200b-3p	E3 ubiquitin-protein ligase CHIP	protein ubiquitination,protein binding,ubiquitin-protein transferase activity
stub1	GIYK01046961	Ssa#XM_014158881.1	ssa-miR-101b-3p,ssa-miR-101a-3p,ssa-miR-17-5p,ssa-miR-106a-5p,ssa-miR-106b-5p,ssa-miR-93a-5p,ssa-miR-20a-5p,ssa-miR-200b-3p	E3 ubiquitin-protein ligase CHIP	protein ubiquitination,protein binding,ubiquitin-protein transferase activity
STT3B	GIYK01057725,GIYK01036458,GIYK01057723,GIYK01057724,GIYK01036459,GIYK01036461	Ssa#XM_014176961.1,Ssa#XM_014142037.1,Ssa#XM_014176961.1,Ssa#XM_014176961.1,Ssa#XM_014142037.1,Ssa#XM_014142037.1	ssa-miR-15e-5p,ssa-miR-15d-5p,ssa-miR-457ab-5p,ssa-miR-301a-5p,ssa-miR-216c-3p	dolichyl-diphosphooligosaccharide--protein glycosyltransferase subunit STT3B isoform X2,dolichyl-diphosphooligosaccharide--protein glycosyltransferase subunit STT3B isoform X1	integral component of membrane,oligosaccharyl transferase activity,protein glycosylation
STT3B	GIYK01066039	Ssa#XM_014202270.1	ssa-miR-1-3p,ssa-miR-462b-5p,ssa-miR-206-3p	dolichyl-diphosphooligosaccharide--protein glycosyltransferase subunit STT3B	integral component of membrane,oligosaccharyl transferase activity,protein glycosylation
STT3A	GIYK01036463	Ssa#XM_014142037.1	ssa-miR-15d-5p,ssa-miR-15e-5p,ssa-miR-216c-3p,ssa-miR-457ab-5p	Dolichyl-diphosphooligosaccharide--protein glycotransferase
strip2	GIYK01043401,GIYK01043399,GIYK01043398,GIYK01043400	Ssa#XM_014207789.1,Ssa#XM_014207789.1,Ssa#XM_014207789.1,Ssa#XM_014207789.1	ssa-miR-101b-3p,ssa-miR-218a-5p,ssa-miR-101a-3p,ssa-miR-222a-5p,ssa-miR-203b-3p,ssa-miR-462b-5p,ssa-miR-214-1-2-3p,ssa-miR-novel-16-5p,ssa-miR-200b-3p	striatin-interacting protein 1 homolog isoform X2,striatin-interacting protein 1 homolog isoform X1
strip2	GIYK01017990,GIYK01017989	Ssa#XM_014207789.1,Ssa#XM_014207789.1	ssa-miR-101b-3p,ssa-miR-218a-5p,ssa-miR-101a-3p,ssa-miR-222a-5p,ssa-miR-462b-5p,ssa-miR-214-1-2-3p,ssa-miR-novel-16-5p,ssa-miR-214-3-3p	striatin-interacting protein 1 homolog isoform X2
STRADA	GIYK01014883,GIYK01014878,GIYK01014881,GIYK01064789,GIYK01009071,GIYK01014882,GIYK01064790,GIYK01009068,GIYK01009070,GIYK01014884,GIYK01009072,GIYK01014877,GIYK01014880	Ssa#XM_014203280.1,Ssa#XM_014203280.1,Ssa#XM_014203280.1,Ssa#XM_014203280.1,Ssa#XM_014203280.1,Ssa#XM_014203280.1,Ssa#XM_014203280.1,Ssa#XM_014203280.1,Ssa#XM_014203280.1,Ssa#XM_014203280.1,Ssa#XM_014203280.1,Ssa#XM_014203280.1,Ssa#XM_014203280.1	ssa-let-7e-5p,ssa-miR-200b-3p	STE20-related kinase adapter protein alpha-like isoform X3,STE20-related kinase adapter protein alpha-like isoform X1	protein kinase activity,ATP binding,protein phosphorylation
STON1	GIYK01059809	Ssa#XM_014214075.1	ssa-miR-455-3p	stonin-1-like	transcription initiation from RNA polymerase II promoter,transcription factor TFIIA complex,endocytosis
STMN1	GIYK01005319,GIYK01012885,GIYK01012884	Ssa#XM_014200198.1,Ssa#XM_014200198.1,Ssa#XM_014200198.1	ssa-miR-216c-3p	stathmin-like	regulation of microtubule polymerization or depolymerization
stml2	GIYK01002948,GIYK01002949	Ssa#NM_001141736.1,Ssa#NM_001141736.1	ssa-miR-216c-3p	stomatin-like protein 2, mitochondrial	membrane
stk6	GIYK01031529,GIYK01031531,GIYK01031532	Ssa#NM_001141638.1,Ssa#NM_001141638.1,Ssa#NM_001141638.1	ssa-miR-101b-3p,ssa-miR-15e-5p,ssa-miR-101a-3p,ssa-miR-15d-5p,ssa-miR-457ab-5p,ssa-miR-214-1-2-3p,ssa-miR-214-3-3p,ssa-miR-200b-3p		protein kinase activity,ATP binding,protein phosphorylation
stk6	GIYK01031530	Ssa#NM_001141638.1	ssa-miR-101b-3p,ssa-miR-101a-3p,ssa-miR-200b-3p,ssa-miR-214-1-2-3p,ssa-miR-214-3-3p	aurora kinase A	ATP binding,protein phosphorylation,protein serine/threonine kinase activity
STK38	GIYK01039054,GIYK01039052,GIYK01039053	Ssa#XM_014146090.1,Ssa#XM_014146090.1,Ssa#XM_014146090.1	ssa-miR-222b-3p,ssa-miR-222a-5p,ssa-miR-18bc-5p,ssa-miR-221-3p,ssa-miR-214-1-2-3p	serine/threonine-protein kinase 38 isoform X1,serine/threonine-protein kinase 38-like isoform X2	ATP binding,protein phosphorylation,protein serine/threonine kinase activity
stk35	GIYK01017111	Ssa#NM_001173733.1	ssa-miR-8163-5p,ssa-miR-19a-2-3p,ssa-miR-122-2-3p	serine/threonine-protein kinase PDIK1L-like	ATP binding,protein phosphorylation,protein serine/threonine kinase activity
STK26	GIYK01028672,GIYK01028677,GIYK01028685,GIYK01028681,GIYK01028683,GIYK01028673,GIYK01028675,GIYK01028667,GIYK01028680	Ssa#XM_014195968.1,Ssa#XM_014195968.1,Ssa#XM_014195968.1,Ssa#XM_014195968.1,Ssa#XM_014195968.1,Ssa#XM_014195968.1,Ssa#XM_014195968.1,Ssa#XM_014195968.1,Ssa#XM_014195968.1	ssa-miR-214-1-2-3p,ssa-miR-222a-5p,ssa-miR-205b-5p,ssa-miR-214-3-3p	serine/threonine-protein kinase 26	protein kinase activity,ATP binding,protein phosphorylation
STK26	GIYK01010196,GIYK01028669,GIYK01010193,GIYK01028676,GIYK01028674,GIYK01010201,GIYK01028682,GIYK01028684,GIYK01010200,GIYK01010195,GIYK01010192,GIYK01028668,GIYK01028670,GIYK01028679,GIYK01028671,GIYK01028678	Ssa#XM_014195968.1,Ssa#XM_014195968.1,Ssa#XM_014195968.1,Ssa#XM_014195968.1,Ssa#XM_014195968.1,Ssa#XM_014195968.1,Ssa#XM_014195968.1,Ssa#XM_014195968.1,Ssa#XM_014195968.1,Ssa#XM_014195968.1,Ssa#XM_014195968.1,Ssa#XM_014195968.1,Ssa#XM_014195968.1,Ssa#XM_014195968.1,Ssa#XM_014195968.1,Ssa#XM_014195968.1	ssa-miR-214-1-2-3p,ssa-miR-222a-5p,ssa-miR-205b-5p,ssa-miR-214-3-3p	serine/threonine-protein kinase 26-like isoform X1,serine/threonine-protein kinase 26-like isoform X2	protein kinase activity,ATP binding,protein phosphorylation
STK26	GIYK01010198,GIYK01010199	Ssa#XM_014195968.1,Ssa#XM_014195968.1	ssa-miR-214-1-2-3p,ssa-miR-205b-5p,ssa-miR-214-3-3p		protein kinase activity,ATP binding,protein phosphorylation
STK26	GIYK01010194,GIYK01010197	Ssa#XM_014195968.1,Ssa#XM_014195968.1	ssa-miR-214-1-2-3p,ssa-miR-214-3-3p	serine/threonine-protein kinase 26-like isoform X2	protein kinase activity,ATP binding,protein phosphorylation
STK17A	GIYK01008194,GIYK01015663,GIYK01015661,GIYK01008193,GIYK01008198,GIYK01015662,GIYK01008195,GIYK01015664	Ssa#XM_014204133.1,Ssa#XM_014204133.1,Ssa#XM_014204133.1,Ssa#XM_014204133.1,Ssa#XM_014204133.1,Ssa#XM_014204133.1,Ssa#XM_014204133.1,Ssa#XM_014204133.1	ssa-miR-101b-3p,ssa-miR-15e-5p,ssa-miR-218a-5p,ssa-miR-101a-3p,ssa-miR-17-5p,ssa-miR-106a-5p,ssa-miR-106b-5p,ssa-miR-93a-5p,ssa-miR-205b-5p,ssa-miR-15d-5p,ssa-miR-457ab-5p,ssa-miR-8163-5p,ssa-miR-20a-5p,ssa-miR-19a-2-3p,ssa-miR-214-3-3p	serine/threonine-protein kinase 17A-like	protein kinase activity,ATP binding,protein phosphorylation,protein serine/threonine kinase activity
STK17A	GIYK01008196	Ssa#XM_014204133.1	ssa-miR-101b-3p,ssa-miR-15e-5p,ssa-miR-101a-3p,ssa-miR-17-5p,ssa-miR-106a-5p,ssa-miR-106b-5p,ssa-miR-93a-5p,ssa-miR-205b-5p,ssa-miR-15d-5p,ssa-miR-457ab-5p,ssa-miR-8163-5p,ssa-miR-20a-5p,ssa-miR-19a-2-3p,ssa-miR-214-3-3p	serine/threonine-protein kinase 17A-like	protein kinase activity,ATP binding,protein phosphorylation
STK17A	GIYK01008197	Ssa#XM_014204133.1	ssa-miR-101b-3p,ssa-miR-15e-5p,ssa-miR-101a-3p,ssa-miR-17-5p,ssa-miR-106a-5p,ssa-miR-106b-5p,ssa-miR-93a-5p,ssa-miR-205b-5p,ssa-miR-15d-5p,ssa-miR-457ab-5p,ssa-miR-214-1-2-3p,ssa-miR-8163-5p,ssa-miR-20a-5p,ssa-miR-19a-2-3p,ssa-miR-214-3-3p	serine/threonine-protein kinase 17A-like	protein kinase activity,ATP binding,protein phosphorylation
STK16	GIYK01042902,GIYK01042216	Ssa#NM_001140054.1,Ssa#NM_001140054.1	ssa-miR-1-3p,ssa-miR-301a-5p,ssa-miR-206-3p	serine/threonine-protein kinase 16	protein kinase activity,ATP binding,protein phosphorylation
STIM2	GIYK01062679	Ssa#XM_014206499.1	ssa-miR-novel-13-5p	stromal interaction molecule 2 isoform X1	calcium channel regulator activity,protein binding,integral component of membrane
STAU1	GIYK01052330,GIYK01030198	Ssa#NM_001140192.1,Ssa#XM_014132332.1	ssa-miR-222b-3p,ssa-miR-205b-5p,ssa-miR-221-3p,ssa-miR-216c-3p,ssa-miR-200b-3p	double-stranded RNA-binding protein Staufen homolog 1 isoform X1,double-stranded RNA-binding protein Staufen homolog 1-like isoform X2	RNA binding
STAU1	GIYK01052329,GIYK01052326	Ssa#NM_001140192.1,Ssa#NM_001140192.1	ssa-miR-216c-3p	double-stranded RNA-binding protein Staufen homolog 1 isoform X1	germ cell development,RNA binding
STAU1	GIYK01052328	Ssa#NM_001140192.1	ssa-miR-216c-3p	double-stranded RNA-binding protein Staufen homolog 1 isoform X1	RNA binding
STAT5	GIYK01008166,GIYK01008165,GIYK01008161,GIYK01008158,GIYK01008162,GIYK01008164,GIYK01008163,GIYK01015710,GIYK01015709	Ssa#NM_001173817.1,Ssa#NM_001173817.1,Ssa#NM_001173817.1,Ssa#NM_001173817.1,Ssa#NM_001173817.1,Ssa#NM_001173817.1,Ssa#NM_001173817.1,Ssa#NM_001173817.1,Ssa#NM_001173817.1	ssa-miR-15e-5p,ssa-miR-17-5p,ssa-miR-106a-5p,ssa-miR-106b-5p,ssa-miR-93a-5p,ssa-miR-18bc-5p,ssa-miR-15d-5p,ssa-miR-457ab-5p,ssa-miR-214-1-2-3p,ssa-miR-8163-5p,ssa-miR-301a-5p,ssa-miR-20a-5p,ssa-miR-200b-3p	signal transducer and activator of transcription 5B-like	cytoplasm,DNA binding,DNA-binding transcription factor activity,signal transduction,regulation of transcription DNA-templated,response to estrogen,nucleus
stat4	GIYK01050146	Ssa#NM_001173670.1	ssa-miR-30a-1-2-5p,ssa-miR-222b-3p,ssa-miR-30a-3-4-5p,ssa-miR-221-3p,ssa-miR-30e-5p	signal transducer and activator of transcription 4 isoform X1	cytoplasm,positive regulation of transcription by RNA polymerase II,cytokine-mediated signaling pathway,DNA binding,DNA-binding transcription factor activity,nucleus
STAT3	GIYK01015697,GIYK01015682,GIYK01015675,GIYK01015693,GIYK01015683,GIYK01015701,GIYK01015685,GIYK01015679,GIYK01015686,GIYK01015689,GIYK01015700,GIYK01015696,GIYK01015688,GIYK01015698,GIYK01015677,GIYK01015695,GIYK01015694,GIYK01015678,GIYK01015703,GIYK01015684,GIYK01015690	Ssa#XM_014204117.1,Ssa#XM_014204117.1,Ssa#XM_014204117.1,Ssa#XM_014204117.1,Ssa#XM_014204117.1,Ssa#XM_014204117.1,Ssa#XM_014204117.1,Ssa#XM_014204117.1,Ssa#XM_014204117.1,Ssa#XM_014204117.1,Ssa#XM_014204117.1,Ssa#XM_014204117.1,Ssa#XM_014204117.1,Ssa#XM_014204117.1,Ssa#XM_014204117.1,Ssa#XM_014204117.1,Ssa#XM_014204117.1,Ssa#XM_014204117.1,Ssa#XM_014204117.1,Ssa#XM_014204117.1,Ssa#XM_014204117.1	ssa-miR-205b-5p,ssa-miR-146b-5p,ssa-miR-18bc-5p,ssa-miR-novel-13-5p,ssa-let-7e-5p,ssa-miR-214-1-2-3p,ssa-miR-novel-16-5p,ssa-miR-146a-5p	signal transducer and activator of transcription 3 isoform X6,signal transducer and activator of transcription 3 isoform X1,signal transducer and activator of transcription 3 isoform X4,signal transducer and activator of transcription 3 isoform X3,signal transducer and activator of transcription 3 isoform X5	cytoplasm,DNA binding,DNA-binding transcription factor activity,signal transduction,regulation of transcription DNA-templated,nucleus
STAT3	GIYK01015676,GIYK01015680,GIYK01015699,GIYK01015681,GIYK01015692,GIYK01015691,GIYK01015687	Ssa#XM_014204117.1,Ssa#XM_014204117.1,Ssa#XM_014204117.1,Ssa#XM_014204117.1,Ssa#XM_014204117.1,Ssa#XM_014204117.1,Ssa#XM_014204117.1	ssa-miR-205b-5p,ssa-miR-146b-5p,ssa-miR-18bc-5p,ssa-miR-novel-13-5p,ssa-let-7e-5p,ssa-miR-214-1-2-3p,ssa-miR-novel-16-5p,ssa-miR-146a-5p	Signal transducer and activator of transcription	DNA binding,DNA-binding transcription factor activity,signal transduction,regulation of transcription DNA-templated,nucleus
stat2	GIYK01030604	Ssa#NM_001145424.1	ssa-miR-30a-1-2-5p,ssa-miR-30a-3-4-5p,ssa-miR-221-3p,ssa-miR-30e-5p,ssa-miR-8163-5p	signal transducer and activator of transcription 1-alpha/beta-like isoform X1	protein tyrosine kinase binding,cellular response to interferon-gamma,cellular response to interferon-alpha,cytoplasm,cellular response to type I interferon,positive regulation of DNA-binding transcription factor activity,DNA binding,DNA-binding transcription factor activity,signal transduction,STAT family protein binding,transcription factor binding,nucleus
STAT2	GIYK01030599,GIYK01030600,GIYK01030605,GIYK01030596,GIYK01030603	Ssa#NM_001145424.1,Ssa#NM_001145424.1,Ssa#NM_001145424.1,Ssa#NM_001145424.1,Ssa#NM_001145424.1	ssa-miR-130a-2-3p,ssa-let-7j-3p	signal transducer and activator of transcription 1-alpha/beta-like isoform X1	transcription factor binding,DNA-binding transcription factor activity,cellular response to interferon-gamma,DNA binding,cytoplasm,protein tyrosine kinase binding,STAT family protein binding,nucleus,cellular response to interferon-alpha,cellular response to type I interferon,signal transduction,positive regulation of DNA-binding transcription factor activity
star5	GIYK01027389,GIYK01027388,GIYK01027390,GIYK01027387	Ssa#NM_001165371.1,Ssa#NM_001165371.1,Ssa#NM_001165371.1,Ssa#NM_001165371.1	ssa-miR-101b-3p,ssa-miR-218a-5p,ssa-miR-101a-3p,ssa-miR-93a-5p,ssa-miR-205b-5p,ssa-miR-18bc-5p,ssa-miR-222a-5p,ssa-miR-203b-3p,ssa-miR-214-1-2-3p,ssa-miR-301a-5p,ssa-miR-216c-3p	StAR-related lipid transfer protein 5	lipid binding,bile acid binding
STAM2	GIYK01063891,GIYK01063893,GIYK01063892	Ssa#XM_014165230.1,Ssa#XM_014165230.1,Ssa#XM_014165230.1	ssa-miR-205b-5p,ssa-miR-18bc-5p,ssa-miR-8163-5p,ssa-miR-novel-16-3p,ssa-miR-19a-2-3p,ssa-miR-214-3-3p	signal transducing adapter molecule 2-like	protein binding,intracellular protein transport
STAM2	GIYK01063894	Ssa#XM_014165230.1	ssa-miR-205b-5p,ssa-miR-18bc-5p,ssa-miR-8163-5p,ssa-miR-novel-16-3p,ssa-miR-19a-2-3p,ssa-miR-214-3-3p	signal transducing adapter molecule 2-like	protein binding
STAM2	GIYK01063895	Ssa#XM_014165230.1	ssa-miR-205b-5p,ssa-miR-18bc-5p,ssa-miR-214-1-2-3p,ssa-miR-8163-5p,ssa-miR-216c-3p,ssa-miR-novel-16-3p,ssa-miR-214-3-3p	signal transducing adapter molecule 2-like	intracellular protein transport
ST8SIA5	GIYK01015772,GIYK01015781,GIYK01015779,GIYK01015777,GIYK01015775,GIYK01015780,GIYK01015783,GIYK01015771,GIYK01015774,GIYK01015778,GIYK01015776,GIYK01015782,GIYK01015773	Ssa#XM_014204039.1,Ssa#XM_014204039.1,Ssa#XM_014204039.1,Ssa#XM_014204039.1,Ssa#XM_014204039.1,Ssa#XM_014204039.1,Ssa#XM_014204039.1,Ssa#XM_014204039.1,Ssa#XM_014204039.1,Ssa#XM_014204039.1,Ssa#XM_014204039.1,Ssa#XM_014204039.1,Ssa#XM_014204039.1	ssa-miR-222b-3p,ssa-miR-101a-3p,ssa-miR-221-3p,ssa-miR-203b-3p,ssa-miR-214-1-2-3p,ssa-miR-551a-3p,ssa-miR-200b-3p	alpha-2,8-sialyltransferase 8E-like isoform X4,alpha-2,8-sialyltransferase 8F-like isoform X2,alpha-2,8-sialyltransferase 8F-like isoform X1	integral component of membrane,Golgi apparatus,sialyltransferase activity,sialylation,protein glycosylation
ST2B1	GIYK01032137,GIYK01032133	Ssa#XM_014126197.1,Ssa#XM_014126197.1	ssa-miR-101b-3p,ssa-miR-222b-3p,ssa-miR-101a-3p,ssa-miR-205b-5p,ssa-miR-novel-13-5p,ssa-miR-novel-1-3p,ssa-miR-221-3p,ssa-miR-462b-5p,ssa-miR-19a-2-3p,ssa-miR-200b-3p	cytosolic sulfotransferase 2-like isoform X4	sulfotransferase activity
ST2B1	GIYK01059405,GIYK01059406	Ssa#NM_001141468.1,Ssa#NM_001141468.1	ssa-miR-214-3-3p	sulfotransferase family cytosolic 2B member 1-like	sulfotransferase activity
ST14	GIYK01028388,GIYK01028389	Ssa#XM_014128968.1,Ssa#XM_014128968.1	ssa-miR-301a-5p,ssa-miR-216c-3p,ssa-miR-214-1-2-3p	suppressor of tumorigenicity 14 protein-like
ST14	GIYK01028386	Ssa#XM_014128968.1	ssa-miR-novel-2-5p	suppressor of tumorigenicity 14 protein-like	protein binding,proteolysis,serine-type endopeptidase activity,integral component of membrane
ST14	GIYK01028387	Ssa#XM_014128968.1	ssa-miR-novel-2-5p	suppression of tumorigenicity 14b isoform X3	protein binding,proteolysis,serine-type endopeptidase activity,cellular anatomical entity
SSUH2	GIYK01031613	Ssa#XM_014134074.1	ssa-miR-18bc-5p	protein SSUH2 homolog	unfolded protein binding,heat shock protein binding
SSRB	GIYK01036933,GIYK01036935,GIYK01036934,GIYK01036936	Ssa#XM_014142258.1,Ssa#XM_014142258.1,Ssa#XM_014142258.1,Ssa#XM_014142258.1	ssa-miR-216c-3p	translocon-associated protein subunit beta	endoplasmic reticulum membrane,integral component of membrane,endoplasmic reticulum
SSBP3	GIYK01041891,GIYK01041892,GIYK01041890,GIYK01041896	Ssa#XM_014150432.1,Ssa#XM_014150432.1,Ssa#XM_014150432.1,Ssa#XM_014150432.1	ssa-miR-214-3-3p,ssa-miR-novel-16-5p,ssa-miR-novel-13-5p,ssa-miR-18bc-5p	single-stranded DNA-binding protein 3-like isoform X3	protein binding,single-stranded DNA binding
SSBP3	GIYK01041894,GIYK01041893,GIYK01041897,GIYK01041895,GIYK01041887,GIYK01041886,GIYK01041888	Ssa#XM_014150432.1,Ssa#XM_014150432.1,Ssa#XM_014150432.1,Ssa#XM_014150432.1,Ssa#XM_014150432.1,Ssa#XM_014150432.1,Ssa#XM_014150432.1	ssa-miR-214-3-3p,ssa-miR-novel-16-5p,ssa-miR-novel-13-5p,ssa-miR-18bc-5p	single-stranded DNA-binding protein 3-like isoform X3,single-stranded DNA-binding protein 3-like isoform X1	,protein binding,single-stranded DNA binding
SS18L2	GIYK01027116	Ssa#NM_001140977.1	ssa-miR-222a-5p,ssa-miR-214-3-3p	SS18-like protein 2	positive regulation of transcription by RNA polymerase II,nucleus,transcription coactivator activity,positive regulation of dendrite morphogenesis
SS18	GIYK01035534,GIYK01035535	Ssa#XM_014140234.1,Ssa#XM_014140234.1	ssa-let-7b-3p,ssa-miR-8163-3p,ssa-let-7j-3p,ssa-miR-novel-2-5p,ssa-miR-novel-10-3p	protein SSXT-like isoform X3,protein SSXT-like isoform X4	transcription coactivator activity,positive regulation of nucleic acid-templated transcription
srsf9	GIYK01002782,GIYK01002787	Ssa#XM_014138318.1,Ssa#XM_014138318.1	ssa-miR-15e-5p,ssa-miR-206-3p,ssa-miR-146b-5p,ssa-miR-novel-13-5p,ssa-miR-15d-5p,ssa-miR-462b-5p,ssa-miR-146d-5p,ssa-miR-457ab-5p,ssa-miR-146a-5p,ssa-miR-200b-3p	hypothetical protein Z043_124825, partial	RNA binding
srsf9	GIYK01002770,GIYK01002785,GIYK01002774,GIYK01002778,GIYK01002775,GIYK01002776,GIYK01002780,GIYK01002773,GIYK01002781,GIYK01002779	Ssa#XM_014138318.1,Ssa#XM_014138318.1,Ssa#XM_014138318.1,Ssa#XM_014138318.1,Ssa#XM_014138318.1,Ssa#XM_014138318.1,Ssa#XM_014138318.1,Ssa#XM_014138318.1,Ssa#XM_014138318.1,Ssa#XM_014138318.1	ssa-miR-15d-5p,ssa-miR-15e-5p,ssa-miR-457ab-5p	serine/arginine-rich splicing factor 9-like	RNA binding
srsf9	GIYK01002771,GIYK01002784,GIYK01002777,GIYK01002772,GIYK01002783,GIYK01002786	Ssa#XM_014138318.1,Ssa#XM_014138318.1,Ssa#XM_014138318.1,Ssa#XM_014138318.1,Ssa#XM_014138318.1,Ssa#XM_014138318.1	ssa-miR-15d-5p,ssa-miR-15e-5p,ssa-miR-457ab-5p		nucleic acid binding
srsf9	GIYK01034387,GIYK01034396,GIYK01034388,GIYK01034383,GIYK01034382	Ssa#XM_014138318.1,Ssa#XM_014138318.1,Ssa#XM_014138318.1,Ssa#XM_014138318.1,Ssa#XM_014138318.1	ssa-miR-15e-5p,ssa-miR-1-3p,ssa-miR-15d-5p,ssa-miR-457ab-5p,ssa-miR-206-3p	serine/arginine-rich splicing factor 9-like	nuclear speck,regulation of alternative mRNA splicing via spliceosome,RNA binding,mRNA cis splicing via spliceosome
srsf9	GIYK01034385,GIYK01034390,GIYK01034384,GIYK01034395,GIYK01034397,GIYK01034392,GIYK01034394,GIYK01034389,GIYK01034391	Ssa#XM_014138318.1,Ssa#XM_014138318.1,Ssa#XM_014138318.1,Ssa#XM_014138318.1,Ssa#XM_014138318.1,Ssa#XM_014138318.1,Ssa#XM_014138318.1,Ssa#XM_014138318.1,Ssa#XM_014138318.1	ssa-miR-15e-5p,ssa-miR-1-3p,ssa-miR-15d-5p,ssa-miR-457ab-5p,ssa-miR-206-3p		nucleic acid binding
srsf7	GIYK01029653	Ssa#XM_014170384.1	ssa-miR-203b-3p,ssa-miR-18bc-5p		nucleic acid binding,zinc ion binding
srsf7	GIYK01005346,GIYK01005348,GIYK01005345,GIYK01005347	Ssa#XM_014170384.1,Ssa#XM_014170384.1,Ssa#XM_014170384.1,Ssa#XM_014170384.1	ssa-miR-222b-3p,ssa-miR-18bc-5p,ssa-miR-221-3p,ssa-miR-203b-3p,ssa-miR-206-3p	Splicing factor, arginine/serine-rich 7	RNA binding,zinc ion binding
srsf7	GIYK01005349	Ssa#XM_014170384.1	ssa-miR-221-3p,ssa-miR-203b-3p,ssa-miR-222b-3p	serine/arginine-rich splicing factor 7-like isoform X2	RNA binding,zinc ion binding
srsf7	GIYK01029655,GIYK01029656,GIYK01029657	Ssa#XM_014170384.1,Ssa#XM_014170384.1,Ssa#XM_014170384.1	ssa-let-7e-5p,ssa-miR-18bc-5p	unnamed protein product	RNA binding,zinc ion binding
SRSF2	GIYK01008961,GIYK01008974,GIYK01008958,GIYK01008966,GIYK01008968,GIYK01008959,GIYK01008972	Ssa#XM_014193775.1,Ssa#XM_014193775.1,Ssa#XM_014193775.1,Ssa#XM_014193775.1,Ssa#XM_014193775.1,Ssa#XM_014193775.1,Ssa#XM_014193775.1	ssa-miR-15e-5p,ssa-miR-222b-3p,ssa-miR-153a-3p,ssa-miR-205b-5p,ssa-miR-15d-5p,ssa-miR-221-3p,ssa-miR-457ab-5p,ssa-miR-214-1-2-3p,ssa-miR-214-3-3p,ssa-miR-19a-2-3p,ssa-miR-200b-3p	serine/arginine-rich splicing factor 2-like isoform X1	regulation of alternative mRNA splicing via spliceosome,RNA binding
SRSF2	GIYK01008967,GIYK01008970,GIYK01008960,GIYK01008963,GIYK01008962,GIYK01008969,GIYK01008975,GIYK01008965	Ssa#XM_014193775.1,Ssa#XM_014193775.1,Ssa#XM_014193775.1,Ssa#XM_014193775.1,Ssa#XM_014193775.1,Ssa#XM_014193775.1,Ssa#XM_014193775.1,Ssa#XM_014193775.1	ssa-miR-15e-5p,ssa-miR-222b-3p,ssa-miR-153a-3p,ssa-miR-205b-5p,ssa-miR-15d-5p,ssa-miR-221-3p,ssa-miR-457ab-5p,ssa-miR-214-1-2-3p,ssa-miR-214-3-3p,ssa-miR-19a-2-3p,ssa-miR-200b-3p	serine/arginine-rich splicing factor 2-like isoform X1	regulation of alternative mRNA splicing via spliceosome,RNA binding,negative regulation of nucleic acid-templated transcription,nucleoplasm,mRNA export from nucleus
SRSF2	GIYK01008964	Ssa#XM_014193775.1	ssa-miR-15e-5p,ssa-miR-222b-3p,ssa-miR-153a-3p,ssa-miR-205b-5p,ssa-miR-15d-5p,ssa-miR-221-3p,ssa-miR-457ab-5p,ssa-miR-214-1-2-3p,ssa-miR-214-3-3p,ssa-miR-19a-2-3p,ssa-miR-200b-3p	Serine/arginine-rich splicing factor 2	regulation of alternative mRNA splicing via spliceosome,RNA binding
SRRM2	GIYK01052874,GIYK01052875,GIYK01052873,GIYK01052876	Ssa#XM_014168556.1,Ssa#XM_014168556.1,Ssa#XM_014168556.1,Ssa#XM_014168556.1	ssa-miR-218a-5p,ssa-miR-101a-3p,ssa-miR-18bc-5p	serine/arginine repetitive matrix protein 2-like isoform X1
SRRM1	GIYK01017337,GIYK01017338,GIYK01017335,GIYK01017336,GIYK01017339,GIYK01017340	Ssa#XM_014206765.1,Ssa#XM_014206765.1,Ssa#XM_014206765.1,Ssa#XM_014206765.1,Ssa#XM_014206765.1,Ssa#XM_014206765.1	ssa-miR-30a-1-2-5p,ssa-miR-15e-5p,ssa-miR-30a-3-4-5p,ssa-miR-15d-5p,ssa-miR-30e-5p,ssa-miR-457ab-5p	serine/arginine repetitive matrix protein 1 isoform X3,Y-box-binding protein 2-A-like isoform X1,Y-box-binding protein 2-A-like isoform X2	nucleic acid binding,
SRRM1	GIYK01064103,GIYK01064102	Ssa#XM_014173878.1,Ssa#XM_014173878.1	ssa-let-7b-3p,ssa-miR-455-3p	serine/arginine repetitive matrix protein 1-like isoform X2	RNA binding,regulation of cell cycle,regulation of RNA splicing
srpx2	GIYK01021061	Ssa#XM_014212197.1	ssa-miR-221-3p,ssa-miR-222b-3p	sushi repeat-containing protein SRPX2
SRP14	GIYK01019803,GIYK01019804,GIYK01019801	Ssa#XM_014210505.1,Ssa#XM_014210505.1,Ssa#XM_014210505.1	ssa-miR-15d-5p,ssa-miR-15e-5p,ssa-miR-214-1-2-3p	signal recognition particle 14 kDa protein	,signal recognition particle endoplasmic reticulum targeting,SRP-dependent cotranslational protein targeting to membrane,endoplasmic reticulum signal peptide binding,7S RNA binding
srm	GIYK01039230,GIYK01039231,GIYK01039229	Ssa#XM_014145829.1,Ssa#XM_014145829.1,Ssa#XM_014145829.1	ssa-miR-8163-5p	spermidine synthase	spermidine biosynthetic process,spermidine synthase activity
SQLE	GIYK01004510,GIYK01004509,GIYK01013650	Ssa#XM_014201332.1,Ssa#XM_014201332.1,Ssa#XM_014201332.1	ssa-miR-15e-5p,ssa-miR-222b-3p,ssa-miR-218a-5p,ssa-miR-222a-5p,ssa-miR-15d-5p,ssa-miR-221-3p,ssa-miR-457ab-5p,ssa-miR-214-1-2-3p,ssa-miR-novel-16-3p,ssa-miR-200b-3p	squalene monooxygenase-like	integral component of membrane,sterol biosynthetic process,oxidation-reduction process,squalene monooxygenase activity,flavin adenine dinucleotide binding
SPY1	GIYK01012313,GIYK01020708,GIYK01012312	Ssa#XM_014212027.1,Ssa#XM_014212027.1,Ssa#XM_014212027.1	ssa-miR-30a-1-2-5p,ssa-miR-222b-3p,ssa-miR-218a-5p,ssa-miR-30a-3-4-5p,ssa-miR-221-3p,ssa-miR-novel-16-5p,ssa-miR-200b-3p	protein sprouty homolog 1	membrane,negative regulation of cell population proliferation,negative regulation of ERK1 and ERK2 cascade,organ induction,negative regulation of Ras protein signal transduction
SPTBN1	GIYK01005335,GIYK01005334,GIYK01005333	Ssa#XM_014170641.1,Ssa#XM_014170641.1,Ssa#XM_014170641.1	ssa-miR-203b-3p,ssa-miR-novel-13-5p	spectrin beta chain, non-erythrocytic 1-like isoform X2,spectrin beta chain, non-erythrocytic 1-like isoform X1	spectrin,actin binding,structural constituent of cytoskeleton,phospholipid binding,actin filament capping
SPTBN1	GIYK01001656,GIYK01001657,GIYK01001655	Ssa#XM_014205739.1,Ssa#XM_014205739.1,Ssa#XM_014205739.1	ssa-miR-8163-5p	spectrin beta chain, non-erythrocytic 1 isoform X1,spectrin beta chain, non-erythrocytic 1 isoform X2	spectrin,actin binding,protein binding,structural constituent of cytoskeleton,phospholipid binding,actin filament capping
SPSB4	GIYK01035141,GIYK01035142	Ssa#XM_014139785.1,Ssa#XM_014139785.1	ssa-miR-30a-1-2-5p,ssa-miR-15e-5p,ssa-miR-218a-5p,ssa-miR-30a-3-4-5p,ssa-miR-15d-5p,ssa-miR-30e-5p,ssa-miR-457ab-5p,ssa-miR-216c-3p	SPRY domain-containing SOCS box protein 4-like	protein binding
spry4	GIYK01032237	Ssa#NM_001140765.1	ssa-miR-221-3p,ssa-miR-222b-3p	SPRY domain-containing protein 4-like	protein binding
spr	GIYK01027981	Ssa#XM_014136750.1	ssa-miR-101b-3p,ssa-miR-1-3p,ssa-miR-101a-3p,ssa-miR-17-5p,ssa-miR-106a-5p,ssa-miR-106b-5p,ssa-miR-93a-5p,ssa-miR-20a-5p,ssa-miR-200b-3p	sepiapterin reductase	oxidation-reduction process,tetrahydrobiopterin biosynthetic process,sepiapterin reductase activity
spr	GIYK01027982	Ssa#NM_001140274.1	ssa-miR-101b-3p,ssa-miR-1-3p,ssa-miR-101a-3p,ssa-miR-17-5p,ssa-miR-106a-5p,ssa-miR-106b-5p,ssa-miR-93a-5p,ssa-miR-20a-5p,ssa-miR-200b-3p	sepiapterin reductase
SPPL3	GIYK01002927,GIYK01002926	Ssa#XM_014131560.1,Ssa#XM_014131560.1	ssa-miR-222a-5p,ssa-miR-214-3-3p	signal peptide peptidase-like 3 isoform X1,signal peptide peptidase-like 3 isoform X3	proteolysis,aspartic-type endopeptidase activity,integral component of membrane
sppl2b	GIYK01036178	Ssa#NM_001140333.1	ssa-miR-101b-3p,ssa-miR-novel-16-3p,ssa-miR-101a-3p	signal peptide peptidase-like 2B isoform X2	integral component of membrane,membrane protein intracellular domain proteolysis,aspartic endopeptidase activity intramembrane cleaving
sppl2b	GIYK01036177,GIYK01036176,GIYK01036174,GIYK01036179,GIYK01036175	Ssa#NM_001140333.1,Ssa#NM_001140333.1,Ssa#NM_001140333.1,Ssa#NM_001140333.1,Ssa#NM_001140333.1	ssa-miR-101b-3p,ssa-miR-101a-3p	signal peptide peptidase-like 2B	negative regulation of coagulation,integral component of membrane,membrane protein intracellular domain proteolysis,aspartic endopeptidase activity intramembrane cleaving
SPON2	GIYK01012743	Ssa#XM_014200061.1	ssa-miR-8163-5p,ssa-miR-214-3-3p,ssa-miR-122-2-3p	spondin-2-like	extracellular matrix
SPIN1	GIYK01069232,GIYK01069233	Ssa#XM_014214075.1,Ssa#XM_014214075.1	ssa-miR-15e-5p,ssa-miR-218a-5p,ssa-miR-200b-3p,ssa-miR-15d-5p,ssa-miR-203b-3p,ssa-miR-301a-5p,ssa-miR-214-3-3p	protein spinster homolog 1-like	integral component of membrane,transmembrane transport,transmembrane transporter activity
SPIN1	GIYK01056538,GIYK01056539	Ssa#NM_001165328.1,Ssa#NM_001165328.1	ssa-miR-15e-5p,ssa-miR-153a-3p,ssa-miR-15d-5p,ssa-miR-457ab-5p,ssa-miR-200b-3p	spindlin-1	gamete generation,nucleus,cell cycle
sphm	GIYK01063475,GIYK01063478,GIYK01063477	Ssa#NM_001140312.1,Ssa#NM_001140312.1,Ssa#NM_001140312.1	ssa-miR-novel-13-5p,ssa-miR-214-1-2-3p	N-sulphoglucosamine sulphohydrolase-like,N-sulphoglucosamine sulphohydrolase	N-sulfoglucosamine sulfohydrolase activity,sulfuric ester hydrolase activity
sphm	GIYK01063476	Ssa#NM_001140312.1	ssa-miR-214-1-2-3p	N-sulphoglucosamine sulphohydrolase-like,N-sulphoglucosamine sulphohydrolase	sulfuric ester hydrolase activity
SPF30	GIYK01044654	Ssa#XM_014154671.1	ssa-miR-30a-1-2-5p,ssa-miR-30a-3-4-5p,ssa-miR-30e-5p,ssa-miR-novel-16-5p,ssa-miR-216c-3p	survival of motor neuron-related-splicing factor 30	cytoplasm,nucleus,RNA binding,mRNA processing
SPEN	GIYK01032436	Ssa#XM_014135352.1	ssa-miR-19a-2-3p	msx2-interacting protein
spdl1	GIYK01012778,GIYK01012779	Ssa#XM_014200089.1,Ssa#XM_014200089.1	ssa-miR-1-3p,ssa-miR-153a-3p,ssa-miR-218a-5p,ssa-miR-206-3p,ssa-miR-301a-5p,ssa-miR-novel-16-3p	protein Spindly-like
SPCS2	GIYK01048904	Ssa#NM_001141370.1	ssa-miR-210-1-5p,ssa-miR-142b-5p	probable signal peptidase complex subunit 2	signal peptidase complex,signal peptide processing,integral component of membrane,peptidase activity
SPCS2	GIYK01048905	Ssa#NM_001141370.1	ssa-miR-210-1-5p,ssa-miR-142b-5p	putative signal peptidase complex subunit 2	signal peptidase complex,signal peptide processing,integral component of membrane,peptidase activity
SPCS2	GIYK01048906	Ssa#NM_001141370.1	ssa-miR-210-1-5p,ssa-miR-142b-5p	unnamed protein product	signal peptidase complex,signal peptide processing,integral component of membrane,peptidase activity
SPATA6	GIYK01017412	Ssa#XM_014206708.1	ssa-miR-142b-5p	spermatogenesis associated 6-like protein	myosin light chain binding,sperm connecting piece,spermatogenesis
SPATA5L1	GIYK01057497	Ssa#XM_014127417.1	ssa-miR-205b-5p	spermatogenesis-associated protein 5-like protein 1	ATP binding
SPATA13	GIYK01060785,GIYK01060783	Ssa#XM_014214075.1,Ssa#XM_014181475.1	ssa-miR-15e-5p,ssa-miR-novel-13-5p,ssa-miR-457ab-5p,ssa-miR-novel-16-5p,ssa-miR-206-3p	spermatogenesis-associated protein 13-like isoform X2,unnamed protein product	,guanyl-nucleotide exchange factor activity
SPARC	GIYK01011823	Ssa#XM_014198623.1	ssa-miR-30a-1-2-5p,ssa-miR-101b-3p,ssa-miR-101a-3p,ssa-miR-93a-5p,ssa-miR-30a-3-4-5p,ssa-miR-30e-5p	SPARC precursor	extracellular space,otolith morphogenesis,collagen-containing extracellular matrix,cartilage development,otic vesicle formation,erythrocyte differentiation,protein binding,calcium ion binding,pharyngeal system development,collagen binding,semicircular canal morphogenesis
SPARC	GIYK01011824,GIYK01011827	Ssa#XM_014198623.1,Ssa#XM_014198623.1	ssa-miR-30a-1-2-5p,ssa-miR-101b-3p,ssa-miR-101a-3p,ssa-miR-30a-3-4-5p,ssa-miR-30e-5p,ssa-miR-214-1-2-3p	SPARC precursor	protein binding,calcium ion binding
SPAG5	GIYK01009522,GIYK01019138,GIYK01019142,GIYK01019140,GIYK01019146,GIYK01019137,GIYK01009521	Ssa#XM_014209521.1,Ssa#XM_014209521.1,Ssa#XM_014209521.1,Ssa#XM_014209521.1,Ssa#XM_014209521.1,Ssa#XM_014209521.1,Ssa#XM_014209521.1	ssa-miR-218a-5p,ssa-miR-17-5p,ssa-miR-106a-5p,ssa-miR-214-1-2-3p,ssa-miR-8163-5p,ssa-miR-214-3-3p,ssa-miR-20a-5p,ssa-miR-200b-3p	sperm-associated antigen 5 isoform X1,sperm-associated antigen 5 isoform X2	regulation of attachment of spindle microtubules to kinetochore,cell division
SPACA4	GIYK01036487	Ssa#XM_014142013.1	ssa-miR-101b-3p,ssa-miR-101a-3p	sperm acrosome membrane-associated protein 4-like	integral component of membrane
SP2	GIYK01029231,GIYK01029229,GIYK01029228,GIYK01029227,GIYK01029230	Ssa#XM_014176196.1,Ssa#XM_014176196.1,Ssa#XM_014176196.1,Ssa#XM_014176196.1,Ssa#XM_014176196.1	ssa-miR-221-3p,ssa-miR-203b-3p,ssa-miR-8163-5p,ssa-miR-novel-16-3p,ssa-miR-214-3-3p	transcription factor Sp2-like isoform X1	nucleic acid binding,multicellular organism growth
SP2	GIYK01005841,GIYK01005845,GIYK01005844,GIYK01005839,GIYK01005843,GIYK01005838,GIYK01005840,GIYK01005842	Ssa#XM_014176196.1,Ssa#XM_014176196.1,Ssa#XM_014176196.1,Ssa#XM_014176196.1,Ssa#XM_014176196.1,Ssa#XM_014176196.1,Ssa#XM_014176196.1,Ssa#XM_014176196.1	ssa-miR-221-3p,ssa-miR-203b-3p,ssa-miR-214-3-3p	transcription factor Sp2-like isoform X1	nucleic acid binding,multicellular organism growth
SP140	GIYK01015935	Ssa#XM_014204371.1	ssa-miR-101a-3p	nuclear body protein SP140-like protein	DNA binding,protein binding
SP140	GIYK01015937,GIYK01015934,GIYK01015936,GIYK01015938	Ssa#XM_014204371.1,Ssa#XM_014204371.1,Ssa#XM_014204371.1,Ssa#XM_014204371.1	ssa-miR-101a-3p,ssa-miR-200b-3p	nuclear body protein SP140-like protein	metal ion binding,cytoplasm,protein binding,DNA binding,humoral immune response,translation regulator activity,regulation of translation,nucleus
SOX9	GIYK01059065	Ssa#XM_014179186.1	ssa-miR-101b-3p,ssa-miR-1-3p,ssa-miR-101a-3p,ssa-miR-206-3p,ssa-miR-19a-2-3p	transcription factor Sox-9-A-like	astrocyte differentiation,cytoplasm,chromatin binding,oligodendrocyte differentiation,cartilage morphogenesis,DNA binding,embryonic pectoral fin morphogenesis,proepicardium development,retina development in camera-type eye,roof of mouth development,regeneration,regulation of transcription by RNA polymerase II,type B pancreatic cell differentiation,iridophore differentiation,nucleus,visceral serou…
SOX9	GIYK01061878,GIYK01061877,GIYK01064982	Ssa#XM_014202609.1,Ssa#XM_014202609.1,Ssa#XM_014202609.1	ssa-miR-101a-3p,ssa-miR-146b-5p,ssa-miR-146d-5p,ssa-miR-214-1-2-3p,ssa-miR-146a-5p	transcription factor Sox-9-A-like	regulation of transcription by RNA polymerase II,visceral serous pericardium development,type B pancreatic cell differentiation,hepaticobiliary system development,otic placode formation,regeneration,cartilage development,melanocyte differentiation,DNA binding,embryonic pectoral fin morphogenesis,proepicardium development,DNA-binding transcription factor activity RNA polymerase II-specific,iridoph…
sox8	GIYK01014489,GIYK01014488	Ssa#NM_001123599.1,Ssa#NM_001123599.1	ssa-miR-101a-3p,ssa-miR-146b-5p,ssa-miR-novel-13-5p,ssa-miR-146d-5p,ssa-miR-214-1-2-3p,ssa-miR-146a-5p,ssa-miR-200b-3p	transcription factor Sox-8,transcription factor Sox-8-like	regulation of transcription by RNA polymerase II,DNA binding,DNA-binding transcription factor activity RNA polymerase II-specific,regulation of transcription DNA-templated,nucleus
SOX11	GIYK01037870	Ssa#XM_014144031.1	ssa-let-7b-3p,ssa-let-7j-3p	transcription factor SOX-11-like	regulation of transcription DNA-templated,sequence-specific DNA binding,nucleus,DNA-binding transcription factor activity
SOWAHC	GIYK01032973	Ssa#XM_014136050.1	ssa-miR-216c-3p,ssa-miR-novel-16-3p,ssa-miR-19a-2-3p,ssa-miR-206-3p	ankyrin repeat domain-containing protein SOWAHC-like isoform X1	protein binding
SOCS7	GIYK01029232	Ssa#XM_014131057.1	ssa-miR-301a-5p	suppressor of cytokine signaling 7-like isoform X3	intracellular signal transduction
SOCS7	GIYK01005837	Ssa#XM_014131057.1	ssa-miR-301a-5p	suppressor of cytokine signaling 7-like isoform X1	intracellular signal transduction,protein ubiquitination
SOCS2	GIYK01033254,GIYK01033253,GIYK01033252	Ssa#XM_014136431.1,Ssa#XM_014136431.1,Ssa#XM_014136431.1	ssa-miR-15d-5p,ssa-miR-15e-5p	suppressor of cytokine signaling 2-like	intracellular signal transduction,protein ubiquitination
snx6	GIYK01000918,GIYK01000917	Ssa#XM_014194473.1,Ssa#XM_014194473.1	ssa-miR-15e-5p,ssa-miR-146b-5p,ssa-miR-15d-5p,ssa-miR-146d-5p,ssa-miR-457ab-5p,ssa-miR-146a-5p	sorting nexin-6	cytosol,phosphatidylinositol binding,endosome,intracellular protein transport,retrograde transport endosome to Golgi
snx29	GIYK01063808,GIYK01001787,GIYK01001786,GIYK01063811,GIYK01063809,GIYK01063807,GIYK01001788,GIYK01059487,GIYK01063810	Ssa#XM_014208481.1,Ssa#XM_014208481.1,Ssa#XM_014208481.1,Ssa#XM_014208481.1,Ssa#XM_014208481.1,Ssa#XM_014208481.1,Ssa#XM_014208481.1,Ssa#XM_014208481.1,Ssa#XM_014208481.1	ssa-miR-1-3p,ssa-miR-153a-3p,ssa-miR-146d-5p,ssa-miR-214-1-2-3p,ssa-miR-novel-16-5p,ssa-miR-206-3p,ssa-miR-200b-3p	sorting nexin-29	phosphatidylinositol binding
SNX29	GIYK01059488,GIYK01001789	Ssa#XM_014208481.1,Ssa#XM_014208481.1	ssa-miR-153a-3p,ssa-miR-novel-16-5p,ssa-miR-200b-3p	sorting nexin-29 isoform X3,sorting nexin-29-like	phosphatidylinositol binding
snx20	GIYK01026015	Ssa#XM_014157892.1	ssa-miR-15e-5p,ssa-miR-17-5p,ssa-miR-106a-5p,ssa-miR-106b-5p,ssa-miR-93a-5p,ssa-miR-15d-5p,ssa-miR-457ab-5p,ssa-miR-214-1-2-3p,ssa-miR-216c-3p,ssa-miR-20a-5p,ssa-miR-214-3-3p	sorting nexin-20	phosphatidylinositol binding,protein transport
SNX16	GIYK01006587,GIYK01006585,GIYK01006586	Ssa#XM_014189837.1,Ssa#XM_014189837.1,Ssa#XM_014189837.1	ssa-miR-101b-3p,ssa-miR-novel-16-3p,ssa-miR-101a-3p	sorting nexin-16-like	phosphatidylinositol binding
snx14	GIYK01037957,GIYK01037954,GIYK01037959,GIYK01037958,GIYK01037963,GIYK01037965,GIYK01037962,GIYK01037960,GIYK01037956,GIYK01037953,GIYK01037955,GIYK01037964,GIYK01037961	Ssa#NM_001140456.1,Ssa#NM_001140456.1,Ssa#NM_001140456.1,Ssa#NM_001140456.1,Ssa#NM_001140456.1,Ssa#NM_001140456.1,Ssa#NM_001140456.1,Ssa#NM_001140456.1,Ssa#NM_001140456.1,Ssa#NM_001140456.1,Ssa#NM_001140456.1,Ssa#NM_001140456.1,Ssa#NM_001140456.1	ssa-miR-15e-5p,ssa-miR-17-5p,ssa-miR-106a-5p,ssa-miR-106b-5p,ssa-miR-146d-5p,ssa-miR-551a-3p,ssa-miR-216c-3p,ssa-miR-20a-5p,ssa-miR-novel-12-5p,ssa-miR-93a-5p,ssa-miR-15d-5p,ssa-let-7e-5p,ssa-miR-146a-5p,ssa-miR-19a-2-3p,ssa-miR-146b-5p,ssa-miR-457ab-5p,ssa-miR-novel-16-5p,ssa-miR-206-3p,ssa-miR-200b-3p,ssa-miR-205b-5p,ssa-miR-214-1-2-3p,ssa-miR-214-3-3p	sorting nexin-14-like isoform X1,sorting nexin-14,sorting nexin-14-like isoform X3,sorting nexin-14-like isoform X2	phosphatidylinositol-35-bisphosphate binding,integral component of membrane
SNX1	GIYK01064522	Ssa#XM_014127276.1	ssa-miR-30a-1-2-5p,ssa-miR-222b-3p,ssa-miR-30a-3-4-5p,ssa-miR-221-3p,ssa-miR-30e-5p,ssa-miR-200b-3p	sorting nexin-1	intracellular protein transport
SNX1	GIYK01064520,GIYK01027412,GIYK01064524,GIYK01064519	Ssa#XM_014127276.1,Ssa#XM_014127276.1,Ssa#XM_014127276.1,Ssa#XM_014127276.1	ssa-miR-30a-1-2-5p,ssa-miR-30a-3-4-5p,ssa-miR-30e-5p,ssa-miR-200b-3p	Sorting nexin-1	cytosol,retromer complex,phosphatidylinositol binding,intracellular protein transport,retrograde transport endosome to Golgi
SNX1	GIYK01027413	Ssa#XM_014127276.1	ssa-miR-30a-1-2-5p,ssa-miR-30a-3-4-5p,ssa-miR-30e-5p,ssa-miR-200b-3p	sorting nexin-1	cytosol,retromer complex,phosphatidylinositol binding,intracellular protein transport,retrograde transport endosome to Golgi
SNX1	GIYK01064521,GIYK01064523,GIYK01027414	Ssa#XM_014127276.1,Ssa#XM_014127276.1,Ssa#XM_014127276.1	ssa-miR-30a-1-2-5p,ssa-miR-30a-3-4-5p,ssa-miR-30e-5p,ssa-miR-200b-3p	sorting nexin-1-like	cytosol,retromer complex,phosphatidylinositol binding,intracellular protein transport,retrograde transport endosome to Golgi
SNW1	GIYK01017086	Ssa#XM_014169557.1	ssa-miR-novel-16-3p	SNW domain-containing protein 1	spliceosomal complex,mRNA splicing via spliceosome
SNU13	GIYK01009176,GIYK01009177	Ssa#XM_014194097.1,Ssa#XM_014194097.1	ssa-miR-301a-5p	NHP2-like protein 1	mRNA splicing via spliceosome,somite development,precatalytic spliceosome,maturation of LSU-rRNA,RNA binding,maturation of SSU-rRNA,small-subunit processome,box C/D snoRNP complex,U4/U6 x U5 tri-snRNP complex
sntg1	GIYK01007238,GIYK01007240	Ssa#XM_014191137.1,Ssa#XM_014191137.1	ssa-miR-93a-5p,ssa-miR-218a-5p,ssa-miR-200b-3p,ssa-miR-17-5p	gamma-1-syntrophin	protein binding,structural molecule activity
sntg1	GIYK01007239	Ssa#XM_014191137.1	ssa-miR-93a-5p,ssa-miR-218a-5p,ssa-miR-200b-3p,ssa-miR-17-5p	gamma-1-syntrophin isoform X1	protein binding,structural molecule activity
SNTB2	GIYK01040871	Ssa#XM_014148933.1	ssa-miR-15e-5p,ssa-miR-218a-5p,ssa-miR-222a-5p,ssa-miR-15d-5p,ssa-miR-457ab-5p,ssa-miR-214-1-2-3p,ssa-miR-301a-5p,ssa-miR-novel-16-3p,ssa-miR-214-3-3p	beta-2-syntrophin	protein binding,structural molecule activity
SNRNP70	GIYK01052834	Ssa#XM_014168594.1	ssa-miR-203b-3p	U1 small nuclear ribonucleoprotein 70 kDa
SNAP23	GIYK01001000,GIYK01001005,GIYK01001008,GIYK01001004,GIYK01001001,GIYK01000999,GIYK01001002	Ssa#XM_014195338.1,Ssa#XM_014195338.1,Ssa#XM_014195338.1,Ssa#XM_014195338.1,Ssa#XM_014195338.1,Ssa#XM_014195338.1,Ssa#XM_014195338.1	ssa-miR-15e-3p	synaptosomal-associated protein 23 isoform X2
SNAP23	GIYK01001007	Ssa#XM_014195338.1	ssa-miR-15e-3p	synaptosomal-associated protein 23 isoform X1	SNAP receptor activity,presynapse,synaptic vesicle priming,plasma membrane,syntaxin binding,SNARE complex,synaptic vesicle fusion to presynaptic active zone membrane
SMYD5	GIYK01007629	Ssa#XM_014192144.1	ssa-miR-15d-5p,ssa-miR-15e-5p,ssa-miR-457ab-5p	SET and MYND domain-containing protein 5	negative regulation of myeloid cell differentiation,protein binding,definitive hemopoiesis,primitive hemopoiesis
SMU1	GIYK01012346	Ssa#XM_014199459.1	ssa-miR-200b-3p	WD40 repeat-containing protein SMU1	protein binding
SMPD1	GIYK01045049,GIYK01045047,GIYK01045048,GIYK01045046	Ssa#XM_014155372.1,Ssa#XM_014155372.1,Ssa#XM_014155372.1,Ssa#XM_014155372.1	ssa-miR-142b-5p	sphingomyelin phosphodiesterase 5-like	glycosphingolipid metabolic process,integral component of membrane,mitochondrial intermembrane space,sphingomyelin phosphodiesterase activity
smim15	GIYK01054175	Ssa#XM_014171061.1	ssa-miR-101a-3p,ssa-miR-200b-3p	small integral membrane protein 15	integral component of membrane
SMIM12	GIYK01037452	Ssa#XM_014143223.1	ssa-miR-462b-5p,ssa-miR-214-3-3p	small integral membrane protein 12	integral component of membrane
smg7	GIYK01035375,GIYK01035372,GIYK01035374,GIYK01035373	Ssa#XM_014140005.1,Ssa#XM_014140005.1,Ssa#XM_014140005.1,Ssa#XM_014140005.1	ssa-miR-1-3p,ssa-miR-222b-3p,ssa-miR-205b-5p,ssa-miR-222a-5p,ssa-miR-221-3p,ssa-miR-206-3p,ssa-miR-8163-5p	protein SMG7-like isoform X1	protein binding
SMG5	GIYK01013336,GIYK01013337	Ssa#XM_014200757.1,Ssa#XM_014200757.1	ssa-miR-novel-12-5p,ssa-miR-novel-16-5p,ssa-miR-200b-3p	protein SMG5-like	chordate embryonic development,protein binding
SMG1	GIYK01009310,GIYK01009309	Ssa#XM_014194411.1,Ssa#XM_014194411.1	ssa-miR-novel-13-5p,ssa-miR-222a-5p,ssa-miR-novel-16-5p,ssa-miR-novel-16-3p,ssa-miR-214-3-3p		nuclear-transcribed mRNA catabolic process nonsense-mediated decay,protein binding,protein serine/threonine kinase activity
SMG1	GIYK01065877	Ssa#XM_014194411.1	ssa-miR-222a-5p,ssa-miR-novel-16-5p,ssa-miR-novel-13-5p,ssa-miR-214-3-3p	Serine/threonine-protein kinase SMG1-like	protein binding
smek2	GIYK01001635,GIYK01001632,GIYK01001631,GIYK01001633,GIYK01001630,GIYK01001634,GIYK01001636,GIYK01001629,GIYK01001637	Ssa#NM_001173578.1,Ssa#NM_001173578.1,Ssa#NM_001173578.1,Ssa#NM_001173578.1,Ssa#NM_001173578.1,Ssa#NM_001173578.1,Ssa#NM_001173578.1,Ssa#NM_001173578.1,Ssa#NM_001173578.1	ssa-miR-101b-3p,ssa-miR-101a-3p,ssa-miR-206-3p,ssa-miR-146b-5p,ssa-miR-146d-5p,ssa-miR-146a-5p,ssa-miR-19a-2-3p	serine/threonine-protein phosphatase 4 regulatory subunit 3-like isoform X1,serine/threonine-protein phosphatase 4 regulatory subunit 3B isoform X3,serine/threonine-protein phosphatase 4 regulatory subunit 3B isoform X1,serine/threonine-protein phosphatase 4 regulatory subunit 3B isoform X2,serine/threonine-protein phosphatase 4 regulatory subunit 3-like isoform X2
SMC6	GIYK01020384,GIYK01020378,GIYK01020383,GIYK01020387,GIYK01020386,GIYK01020381,GIYK01020388,GIYK01020389,GIYK01020385,GIYK01020379,GIYK01020380,GIYK01020382	Ssa#XM_014211480.1,Ssa#XM_014211480.1,Ssa#XM_014211480.1,Ssa#XM_014211480.1,Ssa#XM_014211480.1,Ssa#XM_014211480.1,Ssa#XM_014211480.1,Ssa#XM_014211480.1,Ssa#XM_014211480.1,Ssa#XM_014211480.1,Ssa#XM_014211480.1,Ssa#XM_014211480.1	ssa-miR-218a-5p,ssa-miR-206-3p,ssa-miR-17-5p,ssa-miR-106a-5p,ssa-miR-93a-5p,ssa-miR-146b-5p,ssa-miR-novel-13-5p,ssa-miR-18bc-5p,ssa-miR-146d-5p,ssa-miR-146a-5p,ssa-miR-8163-5p,ssa-miR-214-3-3p,ssa-miR-20a-5p,ssa-miR-200b-3p	unnamed protein product,structural maintenance of chromosomes protein 6-like
smc6	GIYK01016827,GIYK01016826	Ssa#XM_014205651.1,Ssa#XM_014205651.1	ssa-miR-15d-5p,ssa-miR-15e-5p,ssa-miR-457ab-5p	structural maintenance of chromosomes protein 6 isoform X1
smc5	GIYK01003099	Ssa#XM_014134992.1	ssa-let-7e-5p,ssa-miR-205b-5p,ssa-miR-200b-3p		sister chromatid cohesion,double-strand break repair via homologous recombination,Smc5-Smc6 complex
SMARCB1	GIYK01054854	Ssa#XM_014171683.1	ssa-miR-novel-16-5p	SWI/SNF-related matrix-associated actin-dependent regulator of chromatin subfamily B member 1	DNA binding,nuclear chromosome,chromatin remodeling
SMARCB1	GIYK01055308,GIYK01055306,GIYK01055310,GIYK01055311,GIYK01055309	Ssa#XM_014172506.1,Ssa#XM_014172506.1,Ssa#XM_014172506.1,Ssa#XM_014172506.1,Ssa#XM_014172506.1	ssa-miR-222b-3p,ssa-miR-221-3p,ssa-miR-214-1-2-3p,ssa-miR-8163-5p,ssa-miR-301a-5p,ssa-miR-214-3-3p	SWI/SNF-related matrix-associated actin-dependent regulator of chromatin subfamily A containing DEAD/H box 1A-like isoform X3,SWI/SNF-related matrix-associated actin-dependent regulator of chromatin subfamily A containing DEAD/H box 1 isoform X2,SWI/SNF-related matrix-associated actin-dependent regulator of chromatin subfamily A containing DEAD/H box 1A-like,SWI/SNF-related matrix-associated acti…	ATP binding,protein binding
SMARCB1	GIYK01055307	Ssa#XM_014172506.1	ssa-miR-301a-5p,ssa-miR-214-1-2-3p	SWI/SNF-related matrix-associated actin-dependent regulator of chromatin subfamily A containing DEAD/H box 1A-like	ATP binding,protein binding
SMAD4	GIYK01055283,GIYK01055290	Ssa#XM_014172497.1,Ssa#XM_014172497.1	ssa-miR-15e-5p,ssa-miR-222b-3p,ssa-miR-15d-5p,ssa-miR-221-3p,ssa-miR-457ab-5p,ssa-miR-216c-3p	AChain A, Crystal Structure Analysis Of The Smad4 Active Fragment	protein binding,regulation of transcription DNA-templated
SMAD4	GIYK01055285,GIYK01055286,GIYK01055289,GIYK01055284,GIYK01055287,GIYK01055288	Ssa#XM_014172497.1,Ssa#XM_014172497.1,Ssa#XM_014172497.1,Ssa#XM_014172497.1,Ssa#XM_014172497.1,Ssa#XM_014172497.1	ssa-miR-15e-5p,ssa-miR-222b-3p,ssa-miR-15d-5p,ssa-miR-221-3p,ssa-miR-457ab-5p,ssa-miR-216c-3p	mothers against decapentaplegic homolog 4	transcription regulator complex,cytoplasm,protein binding,DNA binding,DNA-binding transcription factor activity,regulation of transcription DNA-templated,nucleus,transforming growth factor beta receptor signaling pathway
SLMO2	GIYK01038847,GIYK01038848,GIYK01032248	Ssa#XM_014134983.1,Ssa#XM_014134983.1,Ssa#XM_014134983.1	ssa-miR-1-3p,ssa-miR-153a-3p,ssa-miR-203b-3p,ssa-miR-206-3p,ssa-miR-8163-5p,ssa-miR-301a-5p	PRELI domain containing protein 3B-like	mitochondrial intermembrane space
SLK	GIYK01017435,GIYK01017429	Ssa#XM_014206667.1,Ssa#XM_014206667.1	ssa-miR-8163-3p,ssa-miR-455-3p	serine/threonine-protein kinase STE20 isoform X2	mRNA processing,ATP binding,protein binding,RNA phosphodiester bond hydrolysis,protein phosphorylation,ribonuclease activity,protein kinase activity
SLK	GIYK01017431	Ssa#XM_014206667.1	ssa-miR-8163-3p	serine/threonine-protein kinase STE20 isoform X2	mRNA processing,ATP binding,protein binding,RNA phosphodiester bond hydrolysis,protein phosphorylation,ribonuclease activity,protein kinase activity
sld5	GIYK01054612	Ssa#NM_001141540.1	ssa-miR-novel-16-3p	DNA replication complex GINS protein SLD5	DNA-dependent DNA replication,nucleus
SLCO1C1	GIYK01065789,GIYK01065792,GIYK01065791,GIYK01065784,GIYK01065799,GIYK01065798,GIYK01065778,GIYK01065787,GIYK01065783,GIYK01065782,GIYK01065788,GIYK01065785,GIYK01065779	Ssa#XM_014186199.1,Ssa#XM_014186199.1,Ssa#XM_014186199.1,Ssa#XM_014186199.1,Ssa#XM_014186199.1,Ssa#XM_014186199.1,Ssa#XM_014186199.1,Ssa#XM_014186199.1,Ssa#XM_014186199.1,Ssa#XM_014186199.1,Ssa#XM_014186199.1,Ssa#XM_014186199.1,Ssa#XM_014186199.1	ssa-miR-15e-5p,ssa-miR-novel-13-5p,ssa-miR-18bc-5p,ssa-miR-15d-5p,ssa-miR-457ab-5p,ssa-miR-novel-16-3p	solute carrier organic anion transporter family member 1C1-like	integral component of membrane,toxin transport,microcystin transport,protein binding,organic anion transmembrane transporter activity,toxin transmembrane transporter activity,organic anion transport,thyroid hormone transmembrane transporter activity,thyroid hormone transport,transmembrane transport,plasma membrane
SLCO1C1	GIYK01065790	Ssa#XM_014186199.1	ssa-miR-15d-5p,ssa-miR-15e-5p,ssa-miR-457ab-5p,ssa-miR-novel-16-3p	solute carrier organic anion transporter family member 1C1-like	integral component of membrane,protein binding,organic anion transmembrane transporter activity,organic anion transport,thyroid hormone transmembrane transporter activity,thyroid hormone transport,transmembrane transport,plasma membrane
SLCO1C1	GIYK01043295,GIYK01043293,GIYK01043289,GIYK01043288,GIYK01043290,GIYK01043292,GIYK01065793,GIYK01043296,GIYK01043297,GIYK01043287,GIYK01043291,GIYK01043294	Ssa#XM_014152816.1,Ssa#XM_014152816.1,Ssa#XM_014152816.1,Ssa#XM_014152816.1,Ssa#XM_014152816.1,Ssa#XM_014152816.1,Ssa#XM_014186199.1,Ssa#XM_014152816.1,Ssa#XM_014152816.1,Ssa#XM_014152816.1,Ssa#XM_014152816.1,Ssa#XM_014152816.1	ssa-miR-30a-1-2-5p,ssa-miR-15e-5p,ssa-miR-153a-3p,ssa-miR-218a-5p,ssa-miR-30a-3-4-5p,ssa-miR-146b-5p,ssa-miR-novel-13-5p,ssa-miR-15d-5p,ssa-miR-203b-3p,ssa-miR-30e-5p,ssa-miR-146d-5p,ssa-miR-457ab-5p,ssa-miR-146a-5p,ssa-miR-214-3-3p	solute carrier organic anion transporter family member 1C1-like	integral component of membrane,organic anion transmembrane transporter activity,organic anion transport,thyroid hormone transmembrane transporter activity,thyroid hormone transport,transmembrane transport
SLCO1C1	GIYK01065797,GIYK01065794,GIYK01065795,GIYK01065781	Ssa#XM_014186199.1,Ssa#XM_014186199.1,Ssa#XM_014186199.1,Ssa#XM_014186199.1	ssa-miR-15d-5p,ssa-miR-15e-5p,ssa-miR-457ab-5p,ssa-miR-novel-13-5p	solute carrier organic anion transporter family member 1C1-like isoform X1,solute carrier organic anion transporter family member 1C1-like isoform X2,solute carrier organic anion transporter family member 1C1 isoform X2	integral component of membrane,protein binding,organic anion transmembrane transporter activity,organic anion transport,thyroid hormone transmembrane transporter activity,thyroid hormone transport,transmembrane transport,plasma membrane
SLCO1C1	GIYK01068244	Ssa#XM_014186199.1	ssa-miR-15d-5p,ssa-miR-15e-5p,ssa-miR-457ab-5p	solute carrier organic anion transporter family member 1C1-like	integral component of membrane,microcystin transport,protein binding,organic anion transmembrane transporter activity,organic anion transport,thyroid hormone transmembrane transporter activity,thyroid hormone transport,transmembrane transport,plasma membrane
SLCO1C1	GIYK01065796	Ssa#XM_014186199.1	ssa-miR-15d-5p,ssa-miR-15e-5p,ssa-miR-457ab-5p	solute carrier organic anion transporter family member 1C1-like isoform X1,solute carrier organic anion transporter family member 1C1-like isoform X2,solute carrier organic anion transporter family member 1C1 isoform X2	membrane,protein binding,organic anion transmembrane transporter activity,organic anion transport,thyroid hormone transmembrane transporter activity,transmembrane transport
SLC9A3R2	GIYK01064775	Ssa#XM_014193628.1	ssa-miR-221-3p,ssa-miR-222b-3p,ssa-miR-214-1-2-3p,ssa-miR-18bc-5p	Na(+)/H(+) exchange regulatory cofactor NHE-RF1-like	molecular adaptor activity,protein binding,membrane,endomembrane system
SLC9A3R2	GIYK01061659,GIYK01064776	Ssa#XM_014193628.1,Ssa#XM_014193628.1	ssa-miR-216c-3p,ssa-miR-18bc-5p	Na(+)/H(+) exchange regulatory cofactor NHE-RF1-like	molecular adaptor activity,protein binding,membrane,endomembrane system
SLC7A6	GIYK01017512,GIYK01017513	Ssa#XM_014207007.1,Ssa#XM_014207007.1	ssa-miR-novel-16-5p	Y+L amino acid transporter 2-like	integral component of membrane,transmembrane transport,microglia development,transmembrane transporter activity
SLC7A6	GIYK01037381,GIYK01058569	Ssa#XM_014178271.1,Ssa#XM_014178271.1	ssa-miR-101b-3p,ssa-miR-101a-3p,ssa-miR-222a-5p	Y+L amino acid transporter 2-like	integral component of membrane,transmembrane transport,transmembrane transporter activity
SLC7A6	GIYK01017514	Ssa#XM_014207007.1	ssa-miR-novel-16-5p	Y+L amino acid transporter 2-like	transmembrane transport,membrane,transmembrane transporter activity
SLC7A3	GIYK01028642	Ssa#XM_014196012.1	ssa-miR-101b-3p,ssa-miR-15e-5p,ssa-miR-101a-3p,ssa-miR-15d-5p,ssa-miR-462b-5p,ssa-miR-457ab-5p,ssa-miR-novel-16-5p,ssa-miR-301a-5p,ssa-miR-214-3-3p	cationic amino acid transporter 3-like	L-ornithine transmembrane transport,integral component of membrane,arginine transmembrane transporter activity,L-lysine transmembrane transport,L-arginine import across plasma membrane,triglyceride metabolic process,L-ornithine transmembrane transporter activity,fatty acid metabolic process,L-lysine transmembrane transporter activity,plasma membrane
SLC7A3	GIYK01010219	Ssa#XM_014196012.1	ssa-miR-153a-3p,ssa-miR-novel-16-5p,ssa-miR-222a-5p	cationic amino acid transporter 3-like	integral component of membrane,transmembrane transporter activity,triglyceride metabolic process,fatty acid metabolic process,L-alpha-amino acid transmembrane transport
SLC7A11	GIYK01018514,GIYK01018513	Ssa#XM_014208395.1,Ssa#XM_014208395.1	ssa-miR-222a-5p	cystine/glutamate transporter-like	integral component of membrane,transmembrane transport,transmembrane transporter activity
SLC7A10	GIYK01061048	Ssa#XM_014182208.1	ssa-miR-153a-3p,ssa-miR-101a-3p,ssa-miR-17-5p,ssa-miR-106a-5p,ssa-miR-106b-5p,ssa-miR-93a-5p,ssa-miR-222a-5p,ssa-miR-216c-3p,ssa-miR-214-1-2-3p,ssa-miR-novel-16-5p,ssa-miR-214-3-3p,ssa-miR-20a-5p,ssa-miR-19a-2-3p,ssa-miR-200b-3p	asc-type amino acid transporter 1-like	integral component of membrane,transmembrane transport,transmembrane transporter activity
SLC6A6	GIYK01031983,GIYK01031988,GIYK01031985,GIYK01031987,GIYK01031986,GIYK01031984	Ssa#NM_001123630.1,Ssa#NM_001123630.1,Ssa#NM_001123630.1,Ssa#NM_001123630.1,Ssa#NM_001123630.1,Ssa#NM_001123630.1	ssa-miR-101a-3p,ssa-miR-93a-5p,ssa-miR-106a-5p,ssa-miR-146b-5p,ssa-miR-146d-5p,ssa-miR-146a-5p,ssa-miR-301a-5p,ssa-miR-20a-5p,ssa-miR-19a-2-3p	sodium- and chloride-dependent taurine transporter-like isoform X1	integral component of membrane,integral component of plasma membrane,neurotransmitter transport,taurine transport,neurotransmitter:sodium symporter activity,taurine:sodium symporter activity,transmembrane transport
SLC6A6	GIYK01031989	Ssa#NM_001123630.1	ssa-miR-301a-5p	sodium- and chloride-dependent taurine transporter-like isoform X2	neurotransmitter:sodium symporter activity,integral component of membrane,transmembrane transport,neurotransmitter transport
SLC6A6	GIYK01031579,GIYK01031580	Ssa#XM_014134056.1,Ssa#XM_014134056.1	ssa-miR-218a-5p,ssa-miR-101a-3p,ssa-miR-17-5p,ssa-miR-106a-5p,ssa-miR-106b-5p,ssa-miR-93a-5p,ssa-miR-203b-3p,ssa-miR-214-1-2-3p,ssa-miR-novel-16-5p,ssa-miR-20a-5p,ssa-miR-214-3-3p	sodium- and chloride-dependent taurine transporter-like	,integral component of plasma membrane,neurotransmitter transport,taurine transport,neurotransmitter:sodium symporter activity,taurine:sodium symporter activity,transmembrane transport
Slc6a18	GIYK01037441,GIYK01037440	Ssa#XM_014143189.1,Ssa#XM_014143189.1	ssa-miR-1-3p,ssa-miR-17-5p,ssa-miR-106a-5p,ssa-miR-106b-5p,ssa-miR-93a-5p,ssa-miR-205b-5p,ssa-miR-206-3p,ssa-miR-301a-5p,ssa-miR-20a-5p	sodium-dependent neutral amino acid transporter B(0)AT3-like	neurotransmitter:sodium symporter activity,integral component of plasma membrane,transmembrane transport,neurotransmitter transport
SLC6A13	GIYK01030221,GIYK01030218	Ssa#XM_014132343.1,Ssa#XM_014132343.1	ssa-miR-8163-5p,ssa-miR-221-3p,ssa-miR-222b-3p	sodium- and chloride-dependent GABA transporter 2-like isoform X1	neurotransmitter:sodium symporter activity,integral component of membrane,transmembrane transport,neurotransmitter transport
SLC6A13	GIYK01030219,GIYK01030220	Ssa#XM_014132343.1,Ssa#XM_014132343.1	ssa-miR-8163-5p,ssa-miR-221-3p,ssa-miR-222b-3p	sodium- and chloride-dependent GABA transporter 2-like isoform X1	neurotransmitter:sodium symporter activity,integral component of membrane,transmembrane transport,neurotransmitter transport
SLC66A1	GIYK01023025	Ssa#XM_014214075.1	ssa-miR-218a-5p,ssa-miR-novel-16-3p	lysosomal amino acid transporter 1 homolog
SLC66A1	GIYK01039317,GIYK01039320,GIYK01039322	Ssa#XM_014145742.1,Ssa#XM_014145742.1,Ssa#XM_014145742.1	ssa-miR-101b-3p,ssa-miR-15e-5p,ssa-miR-218a-5p,ssa-miR-101a-3p,ssa-miR-15d-5p,ssa-miR-457ab-5p,ssa-miR-214-1-2-3p,ssa-miR-206-3p,ssa-miR-214-3-3p	lysosomal amino acid transporter 1 homolog	integral component of membrane
SLC66A1	GIYK01039324,GIYK01039323,GIYK01039319,GIYK01039321,GIYK01039318	Ssa#XM_014145742.1,Ssa#XM_014145742.1,Ssa#XM_014145742.1,Ssa#XM_014145742.1,Ssa#XM_014145742.1	ssa-miR-101b-3p,ssa-miR-218a-5p,ssa-miR-101a-3p,ssa-miR-214-1-2-3p,ssa-miR-206-3p,ssa-miR-214-3-3p	lysosomal amino acid transporter 1 homolog	integral component of membrane
SLC5A6	GIYK01020398	Ssa#XM_014211491.1	ssa-miR-203b-3p,ssa-miR-93a-5p	sodium-dependent multivitamin transporter isoform X2	integral component of membrane,transmembrane transport,transmembrane transporter activity
SLC5A6	GIYK01020393,GIYK01020392	Ssa#XM_014211491.1,Ssa#XM_014211491.1	ssa-miR-203b-3p,ssa-miR-93a-5p	sodium-dependent multivitamin transporter-like isoform X1	integral component of membrane,transmembrane transport,transmembrane transporter activity
SLC5A3	GIYK01050647,GIYK01050648	Ssa#XM_014164854.1,Ssa#XM_014164854.1	ssa-miR-15e-5p,ssa-miR-222a-5p,ssa-miR-15d-5p,ssa-miR-457ab-5p,ssa-miR-novel-16-5p,ssa-miR-214-3-3p	sodium/myo-inositol cotransporter	integral component of membrane,transmembrane transport,transmembrane transporter activity
SLC52A3	GIYK01012970,GIYK01005191,GIYK01005192,GIYK01005193	Ssa#XM_014200327.1,Ssa#XM_014200327.1,Ssa#XM_014200327.1,Ssa#XM_014200327.1	ssa-miR-30a-1-2-5p,ssa-miR-218a-5p,ssa-miR-30e-5p,ssa-miR-214-1-2-3p,ssa-miR-214-3-3p	riboflavin transporter 2	integral component of plasma membrane,riboflavin transmembrane transporter activity,riboflavin transport
slc52a2	GIYK01057769,GIYK01057767	Ssa#XM_014177034.1,Ssa#XM_014177034.1	ssa-miR-15e-5p,ssa-miR-218a-5p,ssa-miR-15d-5p,ssa-let-7e-5p,ssa-miR-457ab-5p,ssa-miR-214-1-2-3p,ssa-miR-8163-5p,ssa-miR-216c-3p,ssa-miR-214-3-3p	solute carrier family 52, riboflavin transporter, member 2	integral component of plasma membrane,riboflavin transmembrane transporter activity,riboflavin transport
SLC4A11	GIYK01012110,GIYK01012109	Ssa#XM_014214075.1,Ssa#XM_014214075.1	ssa-miR-17-5p,ssa-miR-106a-5p,ssa-miR-106b-5p,ssa-miR-93a-5p,ssa-miR-214-1-2-3p,ssa-miR-20a-5p,ssa-miR-214-3-3p	sodium bicarbonate transporter-like protein 11 isoform X1,sodium bicarbonate transporter-like protein 11 isoform X2	inorganic anion transport,integral component of membrane,inorganic anion exchanger activity
SLC48A1	GIYK01033039,GIYK01033040	Ssa#XM_014136148.1,Ssa#XM_014136148.1	ssa-miR-17-5p,ssa-miR-106a-5p,ssa-miR-106b-5p,ssa-miR-93a-5p,ssa-miR-301a-5p,ssa-miR-20a-5p,ssa-miR-19a-2-3p	heme transporter hrg1-B-like	heme transport,integral component of membrane,heme transmembrane transporter activity
slc46a3	GIYK01028809,GIYK01028807,GIYK01028811,GIYK01028808,GIYK01028810	Ssa#XM_014129808.1,Ssa#XM_014129808.1,Ssa#XM_014129808.1,Ssa#XM_014129808.1,Ssa#XM_014129808.1	ssa-miR-30a-1-2-5p,ssa-miR-17-5p,ssa-miR-106a-5p,ssa-miR-106b-5p,ssa-miR-30a-3-4-5p,ssa-miR-93a-5p,ssa-miR-30e-5p,ssa-miR-214-1-2-3p	solute carrier family 46 member 3-like,solute carrier family 46 member 3-like isoform X3,solute carrier family 46 member 3 isoform X2	,integral component of membrane,transmembrane transport,transmembrane transporter activity
SLC43A3	GIYK01019336	Ssa#XM_014209922.1	ssa-let-7e-5p	solute carrier family 43 member 3-like
SLC43A3	GIYK01019337	Ssa#XM_014209922.1	ssa-miR-novel-2-5p	solute carrier family 43 member 3-like	transmembrane transport,cytoplasm,nucleus,transmembrane transporter activity,integral component of membrane
SLC39A8	GIYK01064135,GIYK01064134,GIYK01064133,GIYK01064136	Ssa#XM_014182456.1,Ssa#XM_014182456.1,Ssa#XM_014182456.1,Ssa#XM_014182456.1	ssa-miR-novel-2-5p	zinc transporter ZIP8	metal ion transport,metal ion transmembrane transporter activity,integral component of membrane,transmembrane transport
SLC39A1	GIYK01004627,GIYK01004629,GIYK01004626,GIYK01004630	Ssa#XM_014161162.1,Ssa#XM_014161162.1,Ssa#XM_014161162.1,Ssa#XM_014161162.1	ssa-miR-106b-5p,ssa-miR-20a-5p,ssa-miR-93a-5p	zinc transporter ZIP1-like isoform X3,Zinc transporter ZIP1	integral component of membrane,metal ion transmembrane transporter activity,transmembrane transport,metal ion transport
slc38a9	GIYK01003724	Ssa#XM_014144643.1	ssa-miR-30a-1-2-5p,ssa-miR-101b-3p,ssa-miR-101a-3p,ssa-miR-30a-3-4-5p,ssa-miR-18bc-5p,ssa-miR-222a-5p,ssa-miR-30e-5p,ssa-miR-214-1-2-3p,ssa-miR-novel-12-5p,ssa-miR-551a-3p,ssa-miR-216c-3p,ssa-miR-19a-2-3p,ssa-miR-214-3-3p	unnamed protein product	integral component of membrane
slc38a9	GIYK01003723,GIYK01003725	Ssa#XM_014144643.1,Ssa#XM_014144643.1	ssa-miR-30a-1-2-5p,ssa-miR-101b-3p,ssa-miR-101a-3p,ssa-miR-30a-3-4-5p,ssa-miR-222a-5p,ssa-miR-18bc-5p,ssa-miR-30e-5p,ssa-miR-551a-3p,ssa-miR-19a-2-3p	sodium-coupled neutral amino acid transporter 9	arginine transmembrane transporter activity,arginine transmembrane transport,integral component of membrane
SLC38A7	GIYK01026946	Ssa#XM_014175757.1	ssa-miR-15e-5p,ssa-miR-15d-5p,ssa-miR-203b-3p,ssa-miR-457ab-5p,ssa-miR-214-1-2-3p,ssa-miR-200b-3p	putative sodium-coupled neutral amino acid transporter 7	integral component of membrane
slc38a6	GIYK01020007,GIYK01020008,GIYK01020010,GIYK01020011,GIYK01020009	Ssa#XM_014210728.1,Ssa#XM_014210728.1,Ssa#XM_014210728.1,Ssa#XM_014210728.1,Ssa#XM_014210728.1	ssa-miR-15e-5p,ssa-miR-222b-3p,ssa-miR-18bc-5p,ssa-miR-15d-5p,ssa-miR-221-3p,ssa-let-7e-5p,ssa-miR-222a-5p,ssa-miR-457ab-5p,ssa-miR-214-1-2-3p,ssa-miR-206-3p	probable sodium-coupled neutral amino acid transporter 6	,integral component of membrane
SLC38A4	GIYK01018565,GIYK01018566	Ssa#XM_014208432.1,Ssa#XM_014208432.1	ssa-miR-8163-5p,ssa-miR-101b-3p,ssa-miR-novel-16-3p,ssa-miR-101a-3p	sodium-coupled neutral amino acid transporter 4-like isoform X1	integral component of membrane
SLC38A2	GIYK01018560,GIYK01043892,GIYK01018559,GIYK01043891,GIYK01018561,GIYK01043890,GIYK01018562,GIYK01018563,GIYK01043889	Ssa#NM_001165305.1,Ssa#NM_001165305.1,Ssa#NM_001165305.1,Ssa#NM_001165305.1,Ssa#NM_001165305.1,Ssa#NM_001165305.1,Ssa#NM_001165305.1,Ssa#NM_001165305.1,Ssa#NM_001165305.1	ssa-miR-203b-3p,ssa-miR-214-3-3p,ssa-miR-novel-13-5p,ssa-miR-200b-3p	sodium-coupled neutral amino acid transporter 2-like	integral component of membrane
SLC37A2	GIYK01033587	Ssa#NM_001140251.1	ssa-miR-19a-2-3p	glucose-6-phosphate exchanger SLC37A2-like isoform X1	integral component of membrane,transmembrane transport,transmembrane transporter activity
SLC37A1	GIYK01056402,GIYK01056400	Ssa#XM_014174572.1,Ssa#XM_014174572.1	ssa-miR-218a-5p,ssa-miR-222a-5p	glucose-6-phosphate exchanger SLC37A1	integral component of membrane,transmembrane transport,transmembrane transporter activity
SLC37A1	GIYK01056401	Ssa#XM_014174572.1	ssa-miR-218a-5p,ssa-miR-222a-5p	glucose-6-phosphate exchanger SLC37A1	integral component of membrane,transmembrane transport,transmembrane transporter activity
SLC37A1	GIYK01056403	Ssa#XM_014174572.1	ssa-miR-218a-5p,ssa-miR-222a-5p	glucose-6-phosphate exchanger SLC37A1-like	integral component of membrane,transmembrane transport,transmembrane transporter activity
SLC36A4	GIYK01049831,GIYK01049830	Ssa#XM_014166192.1,Ssa#XM_014166192.1	ssa-miR-222b-3p,ssa-miR-101a-3p,ssa-miR-200b-3p,ssa-miR-221-3p,ssa-miR-214-1-2-3p,ssa-miR-216c-3p,ssa-miR-214-3-3p	proton-coupled amino acid transporter 4-like isoform X1	integral component of membrane,vacuolar membrane,L-proline transmembrane transporter activity,L-alanine transmembrane transporter activity,L-alanine transport,proline transmembrane transport
SLC36A1	GIYK01062039	Ssa#XM_014198622.1	ssa-miR-30a-1-2-5p,ssa-miR-15e-5p,ssa-miR-222b-3p,ssa-miR-17-5p,ssa-miR-106a-5p,ssa-miR-106b-5p,ssa-miR-30a-3-4-5p,ssa-miR-93a-5p,ssa-miR-15d-5p,ssa-miR-30e-5p,ssa-miR-457ab-5p,ssa-miR-20a-5p,ssa-miR-19a-2-3p,ssa-miR-214-3-3p	proton-coupled amino acid transporter 1-like	integral component of membrane
SLC36A1	GIYK01062040	Ssa#XM_014198622.1	ssa-miR-30a-1-2-5p,ssa-miR-101b-3p,ssa-miR-15e-5p,ssa-miR-222b-3p,ssa-miR-101a-3p,ssa-miR-17-5p,ssa-miR-106a-5p,ssa-miR-106b-5p,ssa-miR-30a-3-4-5p,ssa-miR-93a-5p,ssa-miR-15d-5p,ssa-miR-30e-5p,ssa-miR-457ab-5p,ssa-miR-20a-5p,ssa-miR-19a-2-3p,ssa-miR-214-3-3p	proton-coupled amino acid transporter 1-like
SLC35G1	GIYK01062801	Ssa#XM_014158338.1	ssa-miR-17-5p,ssa-miR-106a-5p,ssa-miR-106b-5p,ssa-miR-93a-5p,ssa-miR-205b-5p,ssa-miR-8163-5p,ssa-miR-20a-5p,ssa-miR-214-3-3p	solute carrier family 35 member G1	integral component of membrane
SLC35F5	GIYK01055461	Ssa#XM_014172981.1	ssa-miR-216c-3p,ssa-miR-205b-5p	solute carrier family 35 member F5-like	integral component of membrane
SLC35E2A	GIYK01039432,GIYK01039430,GIYK01039431,GIYK01039434	Ssa#XM_014205870.1,Ssa#XM_014205870.1,Ssa#XM_014205870.1,Ssa#XM_014205870.1	ssa-miR-101b-3p,ssa-miR-101a-3p,ssa-miR-93a-5p,ssa-miR-106b-5p,ssa-miR-146b-5p,ssa-miR-novel-16-3p,ssa-miR-146d-5p,ssa-miR-214-1-2-3p,ssa-miR-146a-5p,ssa-miR-214-3-3p,ssa-miR-20a-5p,ssa-miR-200b-3p	solute carrier family 35 member E2-like,solute carrier family 35 member E2A-like	integral component of membrane
SLC35E2A	GIYK01039435,GIYK01039433,GIYK01039436	Ssa#XM_014205870.1,Ssa#XM_014205870.1,Ssa#XM_014205870.1	ssa-miR-101b-3p,ssa-miR-101a-3p,ssa-miR-93a-5p,ssa-miR-106b-5p,ssa-miR-146b-5p,ssa-miR-novel-16-3p,ssa-miR-146d-5p,ssa-miR-214-1-2-3p,ssa-miR-146a-5p,ssa-miR-214-3-3p,ssa-miR-20a-5p,ssa-miR-200b-3p	solute carrier family 35 member E2-like	integral component of membrane
SLC35D2	GIYK01034955	Ssa#XM_014139311.1	ssa-miR-101b-3p,ssa-miR-101a-3p,ssa-miR-200b-3p	UDP-N-acetylglucosamine/UDP-glucose/GDP-mannose transporter-like	integral component of membrane,Golgi apparatus,UDP-N-acetylglucosamine transmembrane transporter activity,UDP-N-acetylglucosamine transmembrane transport,UDP-N-acetylgalactosamine transmembrane transporter activity,UDP-N-acetylgalactosamine transmembrane transport,antiporter activity,UDP-glucuronic acid transmembrane transport,UDP-glucuronic acid transmembrane transporter activity
SLC35A4	GIYK01021170	Ssa#XM_014212496.1	ssa-miR-17-5p,ssa-miR-106a-5p,ssa-miR-106b-5p,ssa-miR-93a-5p,ssa-miR-205b-5p,ssa-miR-novel-16-3p,ssa-miR-20a-5p	SLC35A4 upstream open reading frame protein-like isoform X1
SLC33A1	GIYK01023038	Ssa#XM_014163523.1	ssa-miR-8163-5p,ssa-miR-101a-3p,ssa-miR-214-3-3p	acetyl-coenzyme A transporter 1	integral component of membrane,negative regulation of BMP signaling pathway,acetyl-CoA transport,central nervous system neuron axonogenesis,acetyl-CoA transmembrane transporter activity
slc31a1	GIYK01027693,GIYK01027696,GIYK01027697,GIYK01027698,GIYK01027691,GIYK01027701,GIYK01027694,GIYK01027702,GIYK01027695,GIYK01027699,GIYK01027700,GIYK01027692	Ssa#XM_014136650.1,Ssa#XM_014136650.1,Ssa#XM_014136650.1,Ssa#XM_014136650.1,Ssa#XM_014136650.1,Ssa#XM_014136650.1,Ssa#XM_014136650.1,Ssa#XM_014136650.1,Ssa#XM_014136650.1,Ssa#XM_014136650.1,Ssa#XM_014136650.1,Ssa#XM_014136650.1	ssa-miR-222a-5p	high affinity copper uptake protein 1	integral component of membrane,copper ion transmembrane transporter activity,copper ion transmembrane transport,hypotonic salinity response,response to copper ion,cellular response to estrogen stimulus,cellular copper ion homeostasis,plasma membrane
SLC30A4	GIYK01027221	Ssa#XM_014176269.1	ssa-miR-15e-5p,ssa-miR-17-5p,ssa-miR-106a-5p,ssa-miR-106b-5p,ssa-miR-93a-5p,ssa-miR-15d-5p,ssa-miR-457ab-5p,ssa-miR-216c-3p,ssa-miR-20a-5p,ssa-miR-19a-2-3p	zinc transporter 4-like	integral component of membrane,cation transport,transmembrane transport,cation transmembrane transporter activity
SLC30A4	GIYK01057504,GIYK01057505,GIYK01057510,GIYK01057507,GIYK01057513,GIYK01057508,GIYK01057517,GIYK01057509,GIYK01057511,GIYK01057512,GIYK01057519,GIYK01057506	Ssa#XM_014176269.1,Ssa#XM_014176269.1,Ssa#XM_014176269.1,Ssa#XM_014176269.1,Ssa#XM_014176269.1,Ssa#XM_014176269.1,Ssa#XM_014176269.1,Ssa#XM_014176269.1,Ssa#XM_014176269.1,Ssa#XM_014176269.1,Ssa#XM_014176269.1,Ssa#XM_014176269.1	ssa-miR-203b-3p,ssa-let-7e-5p,ssa-miR-216c-3p,ssa-miR-novel-16-3p,ssa-miR-19a-2-3p,ssa-miR-200b-3p	zinc transporter 4-like	integral component of membrane,cation transport,transmembrane transport,cation transmembrane transporter activity
SLC30A4	GIYK01057514	Ssa#XM_014176269.1	ssa-miR-203b-3p,ssa-miR-216c-3p,ssa-miR-novel-16-3p,ssa-miR-19a-2-3p,ssa-miR-200b-3p	zinc transporter 4-like	integral component of membrane,cation transmembrane transport,cation transmembrane transporter activity
SLC30A4	GIYK01057516,GIYK01057515,GIYK01027218,GIYK01057502,GIYK01027219,GIYK01057503,GIYK01057501,GIYK01027220,GIYK01057518	Ssa#XM_014176269.1,Ssa#XM_014176269.1,Ssa#XM_014176269.1,Ssa#XM_014176269.1,Ssa#XM_014176269.1,Ssa#XM_014176269.1,Ssa#XM_014176269.1,Ssa#XM_014176269.1,Ssa#XM_014176269.1	ssa-miR-15e-5p,ssa-miR-17-5p,ssa-miR-106a-5p,ssa-miR-106b-5p,ssa-miR-93a-5p,ssa-miR-novel-16-3p,ssa-miR-15d-5p,ssa-miR-203b-3p,ssa-miR-457ab-5p,ssa-miR-216c-3p,ssa-miR-20a-5p,ssa-miR-19a-2-3p,ssa-miR-200b-3p	Zinc transporter 4	integral component of membrane,cation transmembrane transport,cation transmembrane transporter activity
SLC2A9	GIYK01030895,GIYK01030894	Ssa#XM_014157892.1,Ssa#XM_014157892.1	ssa-miR-novel-16-5p	solute carrier family 2, facilitated glucose transporter member 9-like	integral component of membrane,transmembrane transport,carbohydrate transport,transmembrane transporter activity
SLC2A13	GIYK01026106,GIYK01026104,GIYK01026108	Ssa#XM_014125713.1,Ssa#XM_014125713.1,Ssa#XM_014125713.1	ssa-miR-15e-5p,ssa-miR-15d-5p,ssa-miR-457ab-5p,ssa-miR-216c-3p,ssa-miR-214-3-3p	proton myo-inositol cotransporter-like isoform X2	integral component of membrane,transmembrane transporter activity,glucose transmembrane transport,transmembrane transport,D-glucose transmembrane transporter activity
SLC28A2	GIYK01025500	Ssa#XM_014124831.1	ssa-miR-29b-1-5p,ssa-let-7j-3p	sodium/nucleoside cotransporter 2-like isoform X1	nucleoside transmembrane transport,integral component of plasma membrane,nucleoside:sodium symporter activity
SLC27A6	GIYK01003789,GIYK01003788,GIYK01003787	Ssa#XM_014145289.1,Ssa#XM_014145289.1,Ssa#XM_014145289.1	ssa-miR-101b-3p,ssa-miR-216c-3p	long-chain fatty acid transport protein 6	integral component of membrane,very long-chain fatty acid-CoA ligase activity,long-chain fatty acid metabolic process,long-chain fatty acid-CoA ligase activity,fatty acid transport
SLC27A2	GIYK01065958,GIYK01065960,GIYK01065959	Ssa#XM_014186303.1,Ssa#XM_014186303.1,Ssa#XM_014186303.1	ssa-miR-301a-5p,ssa-miR-222a-5p	very long-chain acyl-CoA synthetase-like	integral component of membrane,catalytic activity
SLC27A2	GIYK01065962,GIYK01065961	Ssa#XM_014186303.1,Ssa#XM_014186303.1	ssa-miR-301a-5p	very long-chain acyl-CoA synthetase-like	integral component of membrane,catalytic activity
SLC27A2	GIYK01053885	Ssa#XM_014170253.1	ssa-let-7e-5p,ssa-miR-214-3-3p,ssa-miR-216c-3p,ssa-miR-18bc-5p	very long-chain acyl-CoA synthetase-like	catalytic activity
SLC27A2	GIYK01053884	Ssa#XM_014170253.1	ssa-miR-216c-3p,ssa-miR-214-3-3p	very long-chain acyl-CoA synthetase-like	integral component of membrane,fatty acid transmembrane transporter activity,very long-chain fatty acid-CoA ligase activity,long-chain fatty acid metabolic process,long-chain fatty acid-CoA ligase activity,fatty acid transport,bile acid biosynthetic process
SLC25A48	GIYK01011813	Ssa#XM_014213246.1	ssa-miR-125b-1-3p,ssa-let-7j-3p	solute carrier family 25 member 48-like	ATP transmembrane transporter activity,integral component of membrane,ATP transport,transmembrane transport
SLC25A47	GIYK01000132	Ssa#XM_014123475.1	ssa-miR-1-3p,ssa-miR-222b-3p,ssa-miR-146b-5p,ssa-miR-146a-5p,ssa-miR-222a-5p,ssa-miR-221-3p,ssa-miR-146d-5p,ssa-miR-214-1-2-3p,ssa-miR-206-3p,ssa-miR-8163-5p,ssa-miR-216c-3p	solute carrier family 25 member 47	integral component of membrane,transmembrane transport,ATP transport,ATP transmembrane transporter activity
SLC25A44	GIYK01062630,GIYK01062631,GIYK01062627	Ssa#XM_014136750.1,Ssa#XM_014136750.1,Ssa#XM_014136750.1	ssa-miR-15d-5p,ssa-miR-457ab-5p,ssa-miR-214-1-2-3p,ssa-miR-222a-5p	solute carrier family 25 member 44-like,solute carrier family 25 member 44 isoform X2	,transmembrane transport,ATP transmembrane transporter activity
SLC25A44	GIYK01057468	Ssa#XM_014176234.1	ssa-miR-205b-5p	solute carrier family 25 member 44-like	integral component of membrane,transmembrane transport,ATP transport,ATP transmembrane transporter activity
SLC25A39	GIYK01061671,GIYK01014963,GIYK01061673,GIYK01014961,GIYK01061670,GIYK01014962,GIYK01061672,GIYK01061667,GIYK01061674,GIYK01061669,GIYK01061668	Ssa#NM_001139854.1,Ssa#NM_001139854.1,Ssa#NM_001139854.1,Ssa#NM_001139854.1,Ssa#NM_001139854.1,Ssa#NM_001139854.1,Ssa#NM_001139854.1,Ssa#NM_001139854.1,Ssa#NM_001139854.1,Ssa#NM_001139854.1,Ssa#NM_001139854.1	ssa-miR-222b-3p,ssa-miR-153a-3p,ssa-miR-221-3p,ssa-miR-214-1-2-3p,ssa-miR-novel-16-3p,ssa-miR-214-3-3p	solute carrier family 25 member 39-like isoform X1,solute carrier family 25 member 39-like isoform X2	integral component of membrane,transmembrane transport,ATP transport,ATP transmembrane transporter activity
SLC25A38	GIYK01008742,GIYK01008744,GIYK01008740,GIYK01008743	Ssa#XM_014193464.1,Ssa#XM_014193464.1,Ssa#XM_014193464.1,Ssa#XM_014193464.1	ssa-miR-17-5p,ssa-miR-106a-5p,ssa-miR-106b-5p,ssa-miR-93a-5p,ssa-miR-216c-3p,ssa-miR-20a-5p,ssa-miR-214-3-3p	mitochondrial glycine transporter B-like	glycine transmembrane transporter activity,integral component of membrane,erythrocyte differentiation,glycine import into mitochondrion,mitochondrial inner membrane
SLC25A38	GIYK01008741,GIYK01008745,GIYK01008746	Ssa#XM_014193464.1,Ssa#XM_014193464.1,Ssa#XM_014193464.1	ssa-miR-17-5p,ssa-miR-106a-5p,ssa-miR-106b-5p,ssa-miR-93a-5p,ssa-miR-216c-3p,ssa-miR-20a-5p,ssa-miR-214-3-3p	solute carrier family 25 member 38-B-like	,integral component of membrane,glycine transmembrane transporter activity,erythrocyte differentiation,glycine import into mitochondrion,mitochondrial inner membrane
SLC25A36	GIYK01049799	Ssa#XM_014215088.1	ssa-miR-novel-16-3p,ssa-miR-200b-3p	solute carrier family 25 member 36-A-like isoform X2	integral component of membrane
SLC25A36	GIYK01022939	Ssa#XM_014215088.1	ssa-miR-200b-3p	solute carrier family 25 member 36-A-like	integral component of membrane,transmembrane transport,ATP transport,ATP transmembrane transporter activity
slc25a35	GIYK01010126	Ssa#XM_014195892.1	ssa-miR-222b-3p,ssa-miR-218a-5p,ssa-miR-221-3p,ssa-miR-206-3p,ssa-miR-8163-5p,ssa-miR-214-3-3p	solute carrier family 25 member 35	integral component of membrane
SLC25A34	GIYK01052435,GIYK01052436	Ssa#XM_014167677.1,Ssa#XM_014167677.1	ssa-miR-200b-3p	solute carrier family 25 member 34-like	integral component of membrane
SLC25A33	GIYK01040087,GIYK01040091	Ssa#NM_001140233.1,Ssa#NM_001140233.1	ssa-miR-210-1-5p,ssa-miR-455-3p	Solute carrier family 25 member 33	ATP transmembrane transporter activity,ATP transport,pyrimidine nucleotide transmembrane transporter activity,mitochondrial inner membrane,integral component of membrane,pyrimidine nucleotide import into mitochondrion
SLC25A33	GIYK01040090,GIYK01040088,GIYK01040089	Ssa#NM_001140233.1,Ssa#NM_001140233.1,Ssa#NM_001140233.1	ssa-miR-210-1-5p	Solute carrier family 25 member 33
SLC25A3	GIYK01043305,GIYK01043301,GIYK01043299,GIYK01017887,GIYK01017890,GIYK01017891,GIYK01017892,GIYK01043303,GIYK01043304,GIYK01017885,GIYK01043300,GIYK01017886,GIYK01017893,GIYK01043302	Ssa#XM_014152817.1,Ssa#XM_014152817.1,Ssa#XM_014152817.1,Ssa#NM_001139640.1,Ssa#NM_001139640.1,Ssa#NM_001139640.1,Ssa#NM_001139640.1,Ssa#XM_014152817.1,Ssa#XM_014152817.1,Ssa#NM_001139640.1,Ssa#XM_014152817.1,Ssa#NM_001139640.1,Ssa#NM_001139640.1,Ssa#XM_014152817.1	ssa-miR-101b-3p,ssa-miR-101a-3p	phosphate carrier protein, mitochondrial-like isoform X2,phosphate carrier protein, mitochondrial-like isoform X1,phosphate carrier protein, mitochondrial-like isoform X3	,integral component of membrane
SLC25A3	GIYK01017896,GIYK01017888,GIYK01017889,GIYK01017894,GIYK01017895	Ssa#NM_001139640.1,Ssa#NM_001139640.1,Ssa#NM_001139640.1,Ssa#NM_001139640.1,Ssa#NM_001139640.1	ssa-miR-101b-3p,ssa-miR-101a-3p	phosphate carrier protein, mitochondrial-like isoform X2,phosphate carrier protein, mitochondrial-like isoform X1	,integral component of membrane
SLC25A20	GIYK01040124	Ssa#XM_014147604.1	ssa-miR-30a-1-2-5p,ssa-miR-30a-3-4-5p,ssa-miR-novel-13-5p,ssa-miR-30e-5p,ssa-miR-206-3p	mitochondrial carnitine/acylcarnitine carrier protein-like isoform X1
SLC25A16	GIYK01044950,GIYK01044949,GIYK01044942,GIYK01044951,GIYK01044940,GIYK01044944	Ssa#XM_014155014.1,Ssa#XM_014155014.1,Ssa#XM_014155014.1,Ssa#XM_014155014.1,Ssa#XM_014155014.1,Ssa#XM_014155014.1	ssa-miR-15e-5p,ssa-miR-15d-5p,ssa-miR-457ab-5p,ssa-miR-214-1-2-3p,ssa-miR-novel-16-3p,ssa-miR-214-3-3p	graves disease carrier protein-like isoform X1
SLC25A16	GIYK01055048	Ssa#XM_014171447.1	ssa-miR-214-3-3p	guanine deaminase-like isoform X1	guanine deaminase activity,guanine catabolic process,zinc ion binding
SLC25A12	GIYK01050297	Ssa#XM_014164055.1	ssa-miR-203b-3p	calcium-binding mitochondrial carrier protein Aralar1-like isoform X2	integral component of membrane,ATP transport,ATP transmembrane transporter activity,calcium ion binding,transmembrane transport
SLC25A1	GIYK01048558	Ssa#XM_014170824.1	ssa-miR-101b-3p,ssa-miR-novel-16-3p,ssa-miR-101a-3p,ssa-miR-200b-3p	tricarboxylate transport protein, mitochondrial-like	integral component of membrane,transmembrane transport,ATP transport,ATP transmembrane transporter activity
SLC25A1	GIYK01034490	Ssa#XM_014176462.1	ssa-miR-216c-3p,ssa-miR-200b-3p	tricarboxylate transport protein, mitochondrial-like	integral component of membrane,transmembrane transport,ATP transport,ATP transmembrane transporter activity
SLC22A23	GIYK01035550	Ssa#XM_014140221.1	ssa-miR-17-5p,ssa-miR-106a-5p,ssa-miR-106b-5p,ssa-miR-93a-5p,ssa-miR-8163-5p,ssa-miR-20a-5p	solute carrier family 22 member 23-like	integral component of membrane,transmembrane transport,transmembrane transporter activity
SLC22A13	GIYK01000057,GIYK01000056,GIYK01000058,GIYK01000055	Ssa#XM_014198043.1,Ssa#XM_014198043.1,Ssa#XM_014198043.1,Ssa#XM_014198043.1	ssa-miR-214-1-2-3p,ssa-miR-214-3-3p	solute carrier family 22 member 13-like isoform X3,solute carrier family 22 member 13-like isoform X1	integral component of membrane,transmembrane transport,transmembrane transporter activity
SLC20A1	GIYK01002915	Ssa#XM_014131420.1	ssa-miR-218a-5p	sodium-dependent phosphate transporter 1-B-like	inorganic phosphate transmembrane transporter activity,membrane,phosphate ion transport
SLC20A1	GIYK01002917	Ssa#XM_014131420.1	ssa-miR-218a-5p	sodium-dependent phosphate transporter 1-B-like	inorganic phosphate transmembrane transporter activity,transmembrane transport,phosphate ion transport,integral component of membrane
SLC1A5	GIYK01021887	Ssa#XM_014213484.1	ssa-miR-218a-5p,ssa-miR-146b-5p,ssa-miR-146d-5p,ssa-miR-214-1-2-3p,ssa-miR-146a-5p,ssa-miR-214-3-3p	neutral amino acid transporter B(0)-like	integral component of membrane,transmembrane transport,symporter activity
SLC1A4	GIYK01045045,GIYK01045044,GIYK01045043,GIYK01062454,GIYK01045042	Ssa#XM_014155332.1,Ssa#XM_014155332.1,Ssa#XM_014155332.1,Ssa#XM_014155332.1,Ssa#XM_014155332.1	ssa-miR-15e-5p,ssa-miR-222b-3p,ssa-miR-205b-5p,ssa-miR-15d-5p,ssa-miR-221-3p,ssa-miR-146d-5p,ssa-miR-457ab-5p,ssa-miR-122-2-3p	neutral amino acid transporter A	integral component of membrane,transmembrane transport,symporter activity
SLC1A3	GIYK01055373	Ssa#XM_014172659.1	ssa-miR-216c-3p,ssa-miR-222a-5p	excitatory amino acid transporter 1-like	integral component of membrane,transmembrane transport,symporter activity
SLC16A7	GIYK01018336,GIYK01043710	Ssa#XM_014153317.1,Ssa#XM_014153317.1	ssa-miR-216c-3p,ssa-miR-222a-5p	monocarboxylate transporter 2	integral component of plasma membrane,monocarboxylic acid transmembrane transporter activity,pyruvate transmembrane transport
SLC16A5	GIYK01058973	Ssa#XM_014178999.1	ssa-miR-101b-3p,ssa-miR-301a-5p,ssa-miR-101a-3p,ssa-miR-206-3p	monocarboxylate transporter 6-like	integral component of membrane,transmembrane transport,transmembrane transporter activity
SLC16A12	GIYK01046535	Ssa#XM_014179287.1	ssa-miR-101a-3p	monocarboxylate transporter 12-B-like isoform X1	integral component of membrane,transmembrane transport,transmembrane transporter activity
SLC16A10	GIYK01038017,GIYK01038020,GIYK01038018,GIYK01038016	Ssa#XM_014144239.1,Ssa#XM_014144239.1,Ssa#XM_014144239.1,Ssa#XM_014144239.1	ssa-miR-30a-1-2-5p,ssa-miR-101b-3p,ssa-miR-15e-5p,ssa-miR-153a-3p,ssa-miR-101a-3p,ssa-miR-15d-5p,ssa-let-7e-5p,ssa-miR-30e-5p,ssa-miR-457ab-5p,ssa-miR-novel-16-5p,ssa-miR-novel-12-5p,ssa-miR-216c-3p,ssa-miR-200b-3p	monocarboxylate transporter 10-like,monocarboxylate transporter 10	aromatic amino acid transmembrane transporter activity,integral component of plasma membrane,thyroid hormone transport,thyroid hormone transmembrane transporter activity,transmembrane transport,aromatic amino acid transport
SLC16A10	GIYK01038019,GIYK01038015	Ssa#XM_014144239.1,Ssa#XM_014144239.1	ssa-miR-30a-1-2-5p,ssa-miR-101b-3p,ssa-miR-153a-3p,ssa-miR-101a-3p,ssa-let-7e-5p,ssa-miR-30e-5p,ssa-miR-novel-16-5p,ssa-miR-216c-3p,ssa-miR-200b-3p	monocarboxylate transporter 10	integral component of plasma membrane,transmembrane transport,thyroid hormone transmembrane transporter activity,aromatic amino acid transmembrane transporter activity
slc16a1	GIYK01031434	Ssa#XM_014133850.1	ssa-miR-222b-3p,ssa-miR-218a-5p,ssa-miR-205b-5p,ssa-miR-221-3p,ssa-miR-novel-16-5p,ssa-miR-8163-5p,ssa-miR-novel-12-5p	monocarboxylate transporter 1-like	integral component of plasma membrane,lactate transmembrane transport,lactate transmembrane transporter activity
slc15a4	GIYK01054753	Ssa#XM_014171842.1	ssa-miR-30a-1-2-5p,ssa-miR-93a-5p,ssa-miR-30a-3-4-5p,ssa-miR-30e-5p,ssa-miR-301a-5p	solute carrier family 15 member 4-like	transmembrane transporter activity,oligopeptide transport,transmembrane transport,integral component of membrane
SLC15A4	GIYK01054754	Ssa#XM_014171842.1	ssa-miR-30a-1-2-5p,ssa-miR-93a-5p,ssa-miR-30a-3-4-5p,ssa-miR-30e-5p,ssa-miR-301a-5p	solute carrier family 15 member 4-like	transmembrane transport,membrane,transmembrane transporter activity
slc12a8	GIYK01056011	Ssa#XM_014173764.1	ssa-miR-203b-3p	solute carrier family 12 member 8	integral component of membrane,cilium assembly,transmembrane transport
SLC11A2	GIYK01032927	Ssa#XM_014135957.1	ssa-miR-30a-1-2-5p,ssa-miR-101b-3p,ssa-miR-101a-3p,ssa-miR-30a-3-4-5p,ssa-miR-30e-5p,ssa-miR-216c-3p	natural resistance-associated macrophage protein 2-like	integral component of membrane,metal ion transmembrane transporter activity,metal ion transport
SLAMF9	GIYK01045609,GIYK01045608,GIYK01045610,GIYK01045615,GIYK01045614,GIYK01045607	Ssa#XM_014202048.1,Ssa#XM_014202048.1,Ssa#XM_014202048.1,Ssa#XM_014202048.1,Ssa#XM_014202048.1,Ssa#XM_014202048.1	ssa-miR-203b-3p,ssa-miR-20a-5p,ssa-miR-93a-5p	SLAM family member 9-like,uncharacterized protein LOC115194499 isoform X3,signaling lymphocytic activation molecule-like isoform X2,SLAM family member 5-like	integral component of membrane
skip	GIYK01022180,GIYK01022171,GIYK01022181,GIYK01022172,GIYK01022175,GIYK01022176,GIYK01022173,GIYK01022174,GIYK01022179	Ssa#NM_001140570.1,Ssa#NM_001140570.1,Ssa#NM_001140570.1,Ssa#NM_001140570.1,Ssa#NM_001140570.1,Ssa#NM_001140570.1,Ssa#NM_001140570.1,Ssa#NM_001140570.1,Ssa#NM_001140570.1	ssa-miR-15e-5p,ssa-miR-17-5p,ssa-miR-93a-5p,ssa-miR-15d-5p,ssa-let-7e-5p,ssa-miR-457ab-5p,ssa-miR-20a-5p	inositol polyphosphate 5-phosphatase K-like isoform X1,inositol polyphosphate 5-phosphatase K isoform X2	phosphatidylinositol dephosphorylation,hydrolase activity
skip	GIYK01022177,GIYK01022182,GIYK01022178	Ssa#NM_001140570.1,Ssa#NM_001140570.1,Ssa#NM_001140570.1	ssa-miR-15e-5p,ssa-miR-17-5p,ssa-miR-93a-5p,ssa-miR-15d-5p,ssa-let-7e-5p,ssa-miR-457ab-5p,ssa-miR-20a-5p
ski	GIYK01040024,GIYK01033261	Ssa#XM_014147322.1,Ssa#XM_014136509.1	ssa-miR-15e-5p,ssa-miR-93a-5p,ssa-miR-15d-5p,ssa-miR-457ab-5p,ssa-miR-novel-16-5p,ssa-miR-20a-5p	ski oncogene	transcription DNA-templated,SMAD binding
ski	GIYK01040025	Ssa#XM_014147322.1	ssa-miR-novel-16-5p,ssa-miR-novel-13-5p,ssa-miR-93a-5p	ski oncogene	transcription DNA-templated,SMAD binding
skap2	GIYK01061245,GIYK01066296	Ssa#XM_014189954.1,Ssa#XM_014189954.1	ssa-miR-8163-5p,ssa-miR-203b-3p,ssa-miR-214-3-3p	Src kinase-associated phosphoprotein 2	kinase activity,phosphorylation,protein binding
ska1	GIYK01002925	Ssa#NM_001146667.1	ssa-miR-222a-5p	Spindle and kinetochore-associated protein 1	chromosome segregation,microtubule binding,cell division
SIRT7	GIYK01038775,GIYK01038777,GIYK01038776	Ssa#XM_014183099.1,Ssa#XM_014183099.1,Ssa#XM_014183099.1	ssa-let-7e-5p,ssa-miR-200b-3p,ssa-miR-18bc-5p	NAD-dependent protein deacetylase sirtuin-7 isoform X2,NAD-dependent protein deacetylase sirtuin-7-like	NAD+ binding
SIPA1L2	GIYK01005375,GIYK01005377,GIYK01005376	Ssa#XM_014171378.1,Ssa#XM_014171378.1,Ssa#XM_014171378.1	ssa-miR-15d-5p,ssa-miR-15e-5p,ssa-miR-457ab-5p	signal-induced proliferation-associated 1-like protein 2 isoform X4,signal-induced proliferation-associated 1-like protein 2 isoform X3	GTPase activator activity,regulation of small GTPase mediated signal transduction,positive regulation of GTPase activity,protein binding
sin3a	GIYK01024866,GIYK01024862,GIYK01024865,GIYK01024863,GIYK01024864	Ssa#XM_014124049.1,Ssa#XM_014124049.1,Ssa#XM_014124049.1,Ssa#XM_014124049.1,Ssa#XM_014124049.1	ssa-miR-novel-12-5p,ssa-miR-551a-3p,ssa-miR-214-1-2-3p,ssa-miR-214-3-3p	paired amphipathic helix protein Sin3a isoform X1	transcription corepressor activity,Sin3 complex,negative regulation of nucleic acid-templated transcription,regulation of transcription DNA-templated
SIM2	GIYK01011176	Ssa#XM_014197127.1	ssa-miR-8163-5p,ssa-miR-221-3p,ssa-miR-222b-3p	single-minded homolog 2-like	protein dimerization activity,DNA binding,DNA-binding transcription factor activity,regulation of transcription DNA-templated,nucleus
SIL1	GIYK01012780	Ssa#XM_014200091.1	ssa-miR-214-3-3p,ssa-miR-novel-16-3p,ssa-miR-214-1-2-3p,ssa-miR-18bc-5p	nucleotide exchange factor SIL1-like isoform X2
SIK2	GIYK01056290,GIYK01056291	Ssa#XM_014174236.1,Ssa#XM_014174236.1	ssa-miR-222a-5p	serine/threonine-protein kinase SIK2-like	ATP binding,protein phosphorylation,protein serine/threonine kinase activity
SIGLEC16	GIYK01004323,GIYK01004324,GIYK01004322,GIYK01013832	Ssa#XM_014156890.1,Ssa#XM_014156890.1,Ssa#XM_014156890.1,Ssa#XM_014156890.1	ssa-miR-222b-3p,ssa-miR-17-5p,ssa-miR-106a-5p,ssa-miR-106b-5p,ssa-miR-93a-5p,ssa-miR-221-3p,ssa-miR-457ab-5p,ssa-miR-214-3-3p,ssa-miR-20a-5p,ssa-miR-200b-3p	uncharacterized protein LOC112067962,uncharacterized protein si:ch211-79k12.1,fibroblast growth factor receptor 4-like	,integral component of membrane,carbohydrate binding
SIGLEC16	GIYK01013833,GIYK01013830,GIYK01013834,GIYK01004321,GIYK01013831	Ssa#XM_014156890.1,Ssa#XM_014156890.1,Ssa#XM_014156890.1,Ssa#XM_014156890.1,Ssa#XM_014156890.1	ssa-miR-222b-3p,ssa-miR-17-5p,ssa-miR-106a-5p,ssa-miR-106b-5p,ssa-miR-93a-5p,ssa-miR-221-3p,ssa-miR-20a-5p,ssa-miR-214-3-3p	fibroblast growth factor receptor 4-like	integral component of membrane,carbohydrate binding
SIGLEC14	GIYK01013194	Ssa#XM_014200574.1	ssa-miR-101b-3p,ssa-miR-205b-5p,ssa-miR-101a-3p	sialic acid-binding Ig-like lectin 14	carbohydrate binding
SIGLEC14	GIYK01061440,GIYK01013196	Ssa#XM_014200574.1,Ssa#XM_014200574.1	ssa-miR-101b-3p,ssa-miR-101a-3p,ssa-miR-205b-5p,ssa-let-7e-5p,ssa-miR-8163-5p,ssa-miR-200b-3p	sialic acid-binding Ig-like lectin 14 isoform X1,sialic acid-binding Ig-like lectin 14	integral component of membrane,carbohydrate binding
SIGLEC11	GIYK01013197	Ssa#XM_014200574.1	ssa-miR-101b-3p,ssa-miR-101a-3p	sialic acid-binding Ig-like lectin 11	integral component of membrane
SIGLEC1	GIYK01013189,GIYK01013188	Ssa#XM_014191518.1,Ssa#XM_014191518.1	ssa-miR-214-1-2-3p,ssa-miR-214-3-3p	sialoadhesin-like,myelin-associated glycoprotein-like	integral component of membrane
SIDT2	GIYK01049107,GIYK01049109	Ssa#XM_014162278.1,Ssa#XM_014162278.1	ssa-miR-203b-3p,ssa-miR-19a-2-3p	SID1 transmembrane family member 2-like isoform X4	RNA transmembrane transporter activity,integral component of membrane,dsRNA transport
SIDT2	GIYK01049108,GIYK01022214	Ssa#XM_014162278.1,Ssa#XM_014213986.1	ssa-miR-203b-3p,ssa-miR-214-1-2-3p,ssa-miR-19a-2-3p	SID1 transmembrane family member 2-like isoform X1,SID1 transmembrane family member 2-like isoform X2	RNA transmembrane transporter activity,integral component of membrane,dsRNA transport
SIAE	GIYK01049736	Ssa#XM_014163145.1	ssa-miR-30a-1-2-5p,ssa-miR-15e-5p,ssa-miR-222b-3p,ssa-miR-30a-3-4-5p,ssa-miR-15d-5p,ssa-miR-221-3p,ssa-miR-30e-5p,ssa-miR-457ab-5p,ssa-miR-novel-12-5p	sialate O-acetylesterase-like	sialate O-acetylesterase activity
SIAE	GIYK01049738,GIYK01049740,GIYK01049737	Ssa#XM_014163145.1,Ssa#XM_014163145.1,Ssa#XM_014163145.1	ssa-miR-130a-2-3p	sialate O-acetylesterase	integral component of membrane,membrane,sialate O-acetylesterase activity
SIAE	GIYK01049739	Ssa#XM_014163145.1	ssa-miR-130a-2-3p	sialate O-acetylesterase	sialate O-acetylesterase activity
SHTN1	GIYK01045451,GIYK01045449	Ssa#XM_014156201.1,Ssa#XM_014156201.1	ssa-miR-218a-5p	shootin-1-like,shootin-1 isoform X2
SHROOM3	GIYK01033440	Ssa#XM_014136804.1	ssa-miR-101b-3p,ssa-miR-101a-3p,ssa-miR-17-5p,ssa-miR-106a-5p,ssa-miR-93a-5p,ssa-miR-18bc-5p,ssa-miR-203b-3p,ssa-miR-206-3p,ssa-miR-novel-16-3p	protein Shroom3-like isoform X1	actin filament binding
SHROOM2	GIYK01023084	Ssa#XM_014215608.1	ssa-miR-8163-3p	protein Shroom2	establishment of melanosome localization,apical protein localization,actin filament binding
SHROOM2	GIYK01066074	Ssa#XM_014215608.1	ssa-miR-8163-3p	protein Shroom2-like isoform X1	establishment of melanosome localization,apical protein localization,actin filament binding
SHROOM1	GIYK01033441	Ssa#XM_014136804.1	ssa-miR-101b-3p,ssa-miR-101a-3p,ssa-miR-17-5p,ssa-miR-106a-5p,ssa-miR-93a-5p,ssa-miR-18bc-5p,ssa-miR-203b-3p,ssa-miR-206-3p,ssa-miR-novel-16-3p	protein Shroom1-like isoform X2	actin filament binding
shmt2	GIYK01031536	Ssa#XM_014133973.1	ssa-miR-218a-5p	serine hydroxymethyltransferase, mitochondrial	mitochondrion,tetrahydrofolate interconversion,methylation,glycine hydroxymethyltransferase activity,methyltransferase activity,glycine biosynthetic process from serine,pyridoxal phosphate binding
shmt2	GIYK01031537,GIYK01031538	Ssa#XM_014133973.1,Ssa#XM_014133973.1	ssa-miR-218a-5p	serine hydroxymethyltransferase, mitochondrial	L-serine catabolic process,folic acid metabolic process,protein homotetramerization,cobalt ion binding,regulation of oxidative phosphorylation,cellular response to tetrahydrofolate,serine binding,BRISC complex,identical protein binding,tetrahydrofolate interconversion,methyltransferase activity,mitochondrial inner membrane,methylation,mitochondrial matrix,glycine hydroxymethyltransferase activity…
shmt2	GIYK01031539	Ssa#XM_014133973.1	ssa-miR-218a-5p	serine hydroxymethyltransferase, mitochondrial	mitochondrion,tetrahydrofolate interconversion,methylation,glycine hydroxymethyltransferase activity,methyltransferase activity,glycine biosynthetic process from serine,pyridoxal phosphate binding
SHISA2	GIYK01060786	Ssa#XM_014199356.1	ssa-miR-210-1-5p	protein shisa-2-like	integral component of membrane
shcbp1	GIYK01056785,GIYK01056783,GIYK01056784,GIYK01056787,GIYK01056786	Ssa#XM_014175558.1,Ssa#XM_014175558.1,Ssa#XM_014175558.1,Ssa#XM_014175558.1,Ssa#XM_014175558.1	ssa-miR-214-1-2-3p,ssa-miR-218a-5p,ssa-miR-205b-5p,ssa-miR-18bc-5p	SHC SH2 domain-binding protein 1-like,SHC SH2 domain-binding protein 1 homolog B-like
shcbp1	GIYK01026644,GIYK01026645	Ssa#XM_014126520.1,Ssa#XM_014126520.1	ssa-miR-146d-5p	SHC SH2 domain-binding protein 1-like
SHC2	GIYK01023720	Ssa#XM_014216408.1	ssa-miR-301a-5p,ssa-miR-214-3-3p,ssa-miR-216c-3p,ssa-miR-18bc-5p	SHC-transforming protein 2-like isoform X2	receptor tyrosine kinase binding,activation of MAPK activity
SH3TC2	GIYK01021599,GIYK01021598	Ssa#XM_014213060.1,Ssa#XM_014213060.1	ssa-miR-222a-5p,ssa-miR-200b-3p	SH3 domain and tetratricopeptide repeat-containing protein 2 isoform X2	protein binding
SH3RF3	GIYK01011871,GIYK01011870	Ssa#XM_014127181.1,Ssa#XM_014127181.1	ssa-miR-93a-5p,ssa-miR-106a-5p,ssa-miR-106b-5p,ssa-miR-17-5p,ssa-miR-20a-5p	SH3 domain-containing RING finger protein 3-like isoform X1	protein ubiquitination,metal ion binding,ligase activity,regulation of JNK cascade,apoptotic process,protein binding,ubiquitin protein ligase activity
SH3PXD2B	GIYK01011545,GIYK01011546	Ssa#XM_014136822.1,Ssa#XM_014136822.1	ssa-miR-101b-3p,ssa-miR-1-3p,ssa-miR-218a-5p,ssa-miR-101a-3p,ssa-miR-93a-5p,ssa-miR-205b-5p,ssa-miR-206-3p	SH3 and PX domain-containing protein 2B-like isoform X1,SH3 and PX domain-containing protein 2B-like isoform X3	heart development,oxidation-reduction process,phosphatidylinositol binding,cytoplasm,protein binding,superoxide-generating NADPH oxidase activity,bone development,podosome assembly,eye development
SH3PXD2B	GIYK01033446,GIYK01033447,GIYK01033448	Ssa#XM_014136822.1,Ssa#XM_014136822.1,Ssa#XM_014136822.1	ssa-miR-218a-5p,ssa-miR-146b-5p,ssa-miR-146d-5p,ssa-miR-146a-5p,ssa-miR-8163-5p	SH3 and PX domain-containing protein 2B-like isoform X4,SH3 and PX domain-containing protein 2B-like isoform X3	heart development,oxidation-reduction process,phosphatidylinositol binding,cytoplasm,protein binding,superoxide-generating NADPH oxidase activity,bone development,podosome assembly,eye development
SH3D19	GIYK01009548	Ssa#XM_014209378.1	ssa-miR-146d-5p,ssa-miR-146b-5p,ssa-miR-146a-5p	SH3 domain-containing protein 19-like	protein binding
SH3D19	GIYK01019026,GIYK01019025	Ssa#XM_014209378.1,Ssa#XM_014209378.1	ssa-miR-222b-3p,ssa-miR-146d-5p,ssa-miR-146b-5p,ssa-miR-146a-5p	SH3 domain-containing protein 19-like isoform X2,SH3 domain-containing protein 19-like	protein binding
SH3BGRL3	GIYK01058317,GIYK01058316	Ssa#XM_014177780.1,Ssa#XM_014177780.1	ssa-miR-203b-3p,ssa-miR-216c-3p,ssa-miR-301a-5p	SH3 domain-binding glutamic acid-rich-like protein 3
SH3BGRL	GIYK01063221,GIYK01063222	Ssa#XM_014213345.1,Ssa#XM_014213345.1	ssa-miR-8163-5p,ssa-miR-214-1-2-3p	SH3 domain-binding glutamic acid-rich-like protein
SH2D3C	GIYK01047932,GIYK01047931,GIYK01047934,GIYK01047933	Ssa#XM_014160575.1,Ssa#XM_014160575.1,Ssa#XM_014160575.1,Ssa#XM_014160575.1	ssa-miR-15e-5p,ssa-miR-153a-3p,ssa-miR-15d-5p,ssa-miR-203b-3p,ssa-miR-457ab-5p,ssa-miR-216c-3p	SH2 domain-containing protein 3C-like isoform X1,SH2 domain-containing protein 3C isoform X2	small GTPase mediated signal transduction,guanyl-nucleotide exchange factor activity
SH2D2A	GIYK01036942,GIYK01036943,GIYK01036938,GIYK01036939,GIYK01036941,GIYK01036940	Ssa#XM_014142258.1,Ssa#XM_014142258.1,Ssa#XM_014142258.1,Ssa#XM_014142258.1,Ssa#XM_014142258.1,Ssa#XM_014142258.1	ssa-miR-101b-3p,ssa-miR-101a-3p,ssa-miR-17-5p,ssa-miR-93a-5p,ssa-miR-106b-5p,ssa-miR-205b-5p,ssa-miR-novel-16-5p,ssa-miR-216c-3p,ssa-miR-20a-5p	unnamed protein product,SH2 domain-containing protein 2A-like
SH2B3	GIYK01047712	Ssa#XM_014158463.1	ssa-miR-203b-3p	SH2B adapter protein 3	hemopoiesis,signaling adaptor activity,signal transduction
SGTA	GIYK01041305	Ssa#XM_014149400.1	ssa-miR-101b-3p,ssa-miR-101a-3p,ssa-miR-19a-2-3p	small glutamine-rich tetratricopeptide repeat-containing protein alpha	protein binding
SGK3	GIYK01047312,GIYK01047313,GIYK01047310,GIYK01047311	Ssa#XM_014159520.1,Ssa#XM_014159520.1,Ssa#XM_014159520.1,Ssa#XM_014159520.1	ssa-miR-214-1-2-3p,ssa-miR-200b-3p	serine/threonine-protein kinase Sgk3-like isoform X1	ATP binding,protein phosphorylation,protein serine/threonine kinase activity,phosphatidylinositol binding
SGK2	GIYK01038871	Ssa#XM_014145603.1	ssa-miR-8163-5p,ssa-miR-551a-3p,ssa-miR-novel-16-5p,ssa-miR-214-3-3p	serine/threonine-protein kinase Sgk2-like	protein kinase activity,ATP binding,protein phosphorylation
SGK2	GIYK01038869,GIYK01038865,GIYK01038866,GIYK01038870,GIYK01038867,GIYK01038864	Ssa#XM_014145603.1,Ssa#XM_014145603.1,Ssa#XM_014214075.1,Ssa#XM_014145603.1,Ssa#XM_014145603.1,Ssa#XM_014145603.1	ssa-miR-15e-5p,ssa-miR-17-5p,ssa-miR-106a-5p,ssa-miR-106b-5p,ssa-miR-93a-5p,ssa-miR-15d-5p,ssa-miR-457ab-5p,ssa-miR-novel-16-5p,ssa-miR-20a-5p,ssa-miR-214-3-3p	serine/threonine-protein kinase Sgk2-like,Serine/threonine-protein kinase Sgk2	ATP binding,protein phosphorylation,protein serine/threonine kinase activity
SFXN1	GIYK01044973,GIYK01044972	Ssa#XM_014155170.1,Ssa#XM_014155170.1	ssa-miR-101b-3p,ssa-miR-222b-3p,ssa-miR-101a-3p,ssa-miR-205b-5p,ssa-miR-18bc-5p,ssa-miR-221-3p,ssa-miR-214-3-3p,ssa-miR-200b-3p	sideroflexin-1-like	mitochondrial membrane,integral component of membrane,ion transmembrane transporter activity,ion transmembrane transport
SFT2A	GIYK01060040	Ssa#XM_014180401.1	ssa-miR-205b-5p	Vesicle transport protein SFT2A	integral component of membrane,vesicle-mediated transport,protein transport
SFRP5	GIYK01002018	Ssa#XM_014136750.1	ssa-miR-101b-3p,ssa-miR-101a-3p	secreted frizzled-related protein 5	regulation of Wnt signaling pathway involved in digestive tract morphogenesis,positive regulation of BMP signaling pathway,non-canonical Wnt signaling pathway,protein binding,extracellular region,endodermal digestive tract morphogenesis,positive regulation of Wnt signaling pathway,convergent extension,closure of optic fissure,embryonic retina morphogenesis in camera-type eye,forebrain development…
SFRP2	GIYK01022996,GIYK01022995	Ssa#XM_014215280.1,Ssa#XM_014215280.1	ssa-miR-203b-3p,ssa-miR-214-1-2-3p,ssa-miR-214-3-3p	secreted frizzled-related protein 2 isoform X2	protein binding
sfrp1	GIYK01048729	Ssa#NM_001140519.1	ssa-miR-101b-3p,ssa-miR-101a-3p	secreted frizzled-related protein 1-like	positive regulation of BMP signaling pathway,protein binding,extracellular region,positive regulation of Wnt signaling pathway,closure of optic fissure,embryonic retina morphogenesis in camera-type eye
sf3b2	GIYK01045635,GIYK01045631,GIYK01045630,GIYK01045637,GIYK01045629,GIYK01045636,GIYK01045628,GIYK01045633,GIYK01045634,GIYK01045632	Ssa#XM_014207310.1,Ssa#XM_014207310.1,Ssa#XM_014207310.1,Ssa#XM_014207310.1,Ssa#XM_014207310.1,Ssa#XM_014207310.1,Ssa#XM_014207310.1,Ssa#XM_014207310.1,Ssa#XM_014207310.1,Ssa#XM_014207310.1	ssa-miR-221-3p,ssa-miR-222b-3p	splicing factor 3B subunit 2-like isoform X1,splicing factor 3B subunit 2-like isoform X2	nucleus
SETD3	GIYK01000969	Ssa#XM_014194918.1	ssa-miR-15e-5p,ssa-miR-18bc-5p,ssa-miR-15d-5p,ssa-miR-457ab-5p,ssa-miR-214-1-2-3p,ssa-miR-8163-5p	histone-lysine N-methyltransferase setd3-like isoform X1	peptidyl-histidine methylation,actin modification,protein binding,protein-histidine N-methyltransferase activity
setd1b	GIYK01002831,GIYK01064067	Ssa#XM_014130654.1,Ssa#XM_014130654.1	ssa-miR-15d-5p,ssa-miR-15e-5p,ssa-miR-457ab-5p,ssa-miR-200b-3p		,histone H3-K4 methylation,Set1C/COMPASS complex,histone-lysine N-methyltransferase activity,protein binding
SET	GIYK01048009,GIYK01048006,GIYK01048005,GIYK01048007	Ssa#XM_014160440.1,Ssa#XM_014160440.1,Ssa#XM_014160440.1,Ssa#XM_014160440.1	ssa-miR-novel-16-3p	protein SET,protein SET isoform X2	nucleosome assembly,nucleus
SET	GIYK01048008	Ssa#XM_014160440.1	ssa-miR-novel-16-3p	protein SET,protein SET isoform X2
set	GIYK01061332	Ssa#NM_001146407.1	ssa-miR-551a-3p	protein SET-like	nucleosome assembly,histone binding,chromatin binding,neuromast development,nucleus
set	GIYK01061333	Ssa#NM_001146407.1	ssa-miR-551a-3p	unnamed protein product	nucleosome assembly,nucleus
SET	GIYK01033165	Ssa#XM_014136305.1	ssa-miR-216c-3p,ssa-miR-novel-16-5p	protein SET-like isoform X2	nucleosome assembly,nucleus
SET	GIYK01033164	Ssa#XM_014136305.1	ssa-miR-125b-1-3p	protein SET-like isoform X2	nucleosome assembly,nucleus
sesn1	GIYK01038641,GIYK01038643,GIYK01038647	Ssa#XM_014145262.1,Ssa#XM_014145262.1,Ssa#XM_014145262.1	ssa-miR-30a-1-2-5p,ssa-miR-15e-5p,ssa-miR-30a-3-4-5p,ssa-miR-18bc-5p,ssa-miR-15d-5p,ssa-miR-30e-5p,ssa-miR-457ab-5p,ssa-miR-551a-3p,ssa-miR-216c-3p,ssa-miR-200b-3p	sestrin-1-like isoform X1	nucleus,regulation of response to reactive oxygen species
sesn1	GIYK01016734,GIYK01038645,GIYK01038642	Ssa#XM_014205501.1,Ssa#XM_014145262.1,Ssa#XM_014145262.1	ssa-miR-30a-1-2-5p,ssa-miR-15e-5p,ssa-miR-30a-3-4-5p,ssa-miR-222a-5p,ssa-miR-15d-5p,ssa-miR-203b-3p,ssa-miR-30e-5p,ssa-miR-457ab-5p,ssa-miR-462b-5p,ssa-miR-551a-3p,ssa-miR-214-3-3p,ssa-miR-216c-3p,ssa-miR-19a-2-3p,ssa-miR-200b-3p	sestrin-1-like isoform X2,sestrin-1-like isoform X1	nucleus,regulation of response to reactive oxygen species
sertad3	GIYK01048955,GIYK01048956,GIYK01048954	Ssa#XM_014162097.1,Ssa#XM_014162097.1,Ssa#XM_014162097.1	ssa-miR-8163-5p	SERTA domain-containing protein 3-like
SERTAD2	GIYK01005469,GIYK01029503	Ssa#XM_014172650.1,Ssa#XM_014131312.1	ssa-miR-15e-5p,ssa-miR-15d-5p,ssa-miR-203b-3p,ssa-miR-457ab-5p,ssa-miR-novel-16-3p,ssa-miR-214-3-3p	SERTA domain-containing protein 2-like
SERTAD2	GIYK01038361	Ssa#XM_014145037.1	ssa-let-7e-5p,ssa-miR-216c-3p,ssa-miR-novel-16-3p,ssa-miR-19a-2-3p	SERTA domain-containing protein 2-like
SERPINE1	GIYK01017633	Ssa#XM_014207192.1	ssa-miR-206-3p	plasminogen activator inhibitor 1-like	extracellular space,serine-type endopeptidase inhibitor activity,negative regulation of plasminogen activation,negative regulation of endopeptidase activity
serpind1	GIYK01047687,GIYK01047679,GIYK01047682,GIYK01047671,GIYK01047674,GIYK01047683,GIYK01047684,GIYK01047689,GIYK01047686,GIYK01047681	Ssa#XM_014161020.1,Ssa#XM_014161020.1,Ssa#XM_014161020.1,Ssa#XM_014161020.1,Ssa#XM_014161020.1,Ssa#XM_014161020.1,Ssa#XM_014161020.1,Ssa#XM_014161020.1,Ssa#XM_014161020.1,Ssa#XM_014161020.1	ssa-miR-214-1-2-3p		extracellular space
serpind1	GIYK01071364	Ssa#XM_014161020.1	ssa-miR-214-1-2-3p	heparin cofactor 2	extracellular space
serpind1	GIYK01047678,GIYK01047670,GIYK01047685,GIYK01047667,GIYK01047669,GIYK01047672,GIYK01047676,GIYK01047675,GIYK01047668,GIYK01047673,GIYK01047680,GIYK01047688,GIYK01047677	Ssa#XM_014161020.1,Ssa#XM_014161020.1,Ssa#XM_014161020.1,Ssa#XM_014161020.1,Ssa#XM_014161020.1,Ssa#XM_014161020.1,Ssa#XM_014161020.1,Ssa#XM_014161020.1,Ssa#XM_014161020.1,Ssa#XM_014161020.1,Ssa#XM_014161020.1,Ssa#XM_014161020.1,Ssa#XM_014161020.1	ssa-miR-214-1-2-3p	heparin cofactor 2	extracellular space
SERPINA1	GIYK01016990	Ssa#XM_014205830.1	ssa-miR-15e-5p,ssa-miR-15d-5p,ssa-miR-457ab-5p,ssa-miR-novel-16-5p,ssa-miR-214-3-3p	alpha-1-antitrypsin homolog	extracellular space,serine-type endopeptidase inhibitor activity,cytoplasm,negative regulation of endopeptidase activity,sperm flagellum
SERPINA1	GIYK01016988,GIYK01016989,GIYK01016991	Ssa#XM_014205830.1,Ssa#XM_014205830.1,Ssa#XM_014205830.1	ssa-miR-146b-5p,ssa-miR-18bc-5p,ssa-let-7e-5p,ssa-miR-146d-5p,ssa-miR-novel-16-5p,ssa-miR-146a-5p,ssa-miR-200b-3p	alpha-1-antitrypsin homolog	extracellular space,serine-type endopeptidase inhibitor activity,cytoplasm,negative regulation of endopeptidase activity,sperm flagellum
SERPINA1	GIYK01016987	Ssa#XM_014205830.1	ssa-miR-146b-5p,ssa-miR-18bc-5p,ssa-let-7e-5p,ssa-miR-146d-5p,ssa-miR-146a-5p,ssa-miR-216c-3p,ssa-miR-200b-3p	alpha-1-antitrypsin homolog	extracellular space
serinc1	GIYK01029834	Ssa#XM_014132180.1	ssa-miR-novel-16-3p	serine incorporator 1-like	sphingolipid metabolic process,integral component of membrane,phosphatidylserine metabolic process
serinc1	GIYK01038106,GIYK01016396,GIYK01016397,GIYK01016395,GIYK01038107	Ssa#NM_001141629.1,Ssa#XM_014205119.1,Ssa#XM_014205119.1,Ssa#XM_014205119.1,Ssa#NM_001141629.1	ssa-miR-222b-3p,ssa-miR-205b-5p,ssa-miR-221-3p,ssa-miR-8163-5p,ssa-miR-216c-3p	Serine incorporator 1,serine incorporator 1	sphingolipid metabolic process,integral component of membrane,phosphatidylserine metabolic process
SERHL	GIYK01029074,GIYK01029060,GIYK01029061,GIYK01029059	Ssa#XM_014130670.1,Ssa#XM_014130670.1,Ssa#XM_014130670.1,Ssa#XM_014130670.1	ssa-miR-17-5p,ssa-miR-106a-5p,ssa-miR-106b-5p,ssa-miR-93a-5p,ssa-miR-205b-5p,ssa-miR-214-1-2-3p,ssa-miR-novel-16-5p,ssa-miR-8163-5p,ssa-miR-216c-3p,ssa-miR-novel-16-3p,ssa-miR-214-3-3p	serine hydrolase-like protein isoform X1	,hydrolase activity
SERB	GIYK01022625,GIYK01049491,GIYK01049492	Ssa#XM_014214356.1,Ssa#XM_014162686.1,Ssa#XM_014162686.1	ssa-miR-17-5p,ssa-miR-106a-5p,ssa-miR-106b-5p,ssa-miR-93a-5p,ssa-miR-146b-5p,ssa-miR-146d-5p,ssa-miR-novel-16-5p,ssa-miR-146a-5p,ssa-miR-20a-5p,ssa-miR-200b-3p	phosphoserine phosphatase-like	phosphoserine phosphatase activity,L-serine biosynthetic process,dephosphorylation
SEPTIN7	GIYK01040901	Ssa#XM_014148894.1	ssa-miR-15e-5p,ssa-miR-1-3p,ssa-miR-218a-5p,ssa-miR-15d-5p,ssa-miR-206-3p	septin-7-like isoform X2	septin complex,GTP binding
SEPTIN6	GIYK01012187,GIYK01012189,GIYK01012188	Ssa#XM_014211792.1,Ssa#XM_014211792.1,Ssa#XM_014211792.1	ssa-miR-15e-5p,ssa-miR-205b-5p,ssa-miR-15d-5p,ssa-miR-457ab-5p,ssa-miR-19a-2-3p,ssa-miR-200b-3p	septin-6 isoform X3,septin-6 isoform X4	,septin complex,GTP binding
SENP7	GIYK01042148,GIYK01042147	Ssa#XM_014152277.1,Ssa#XM_014152277.1	ssa-miR-8163-5p,ssa-miR-214-3-3p,ssa-miR-216c-3p,ssa-miR-200b-3p	sentrin-specific protease 7-like isoform X1	proteolysis,cysteine-type peptidase activity
SENP7	GIYK01050572,GIYK01050573,GIYK01050570,GIYK01050571,GIYK01050575,GIYK01050574	Ssa#XM_014164945.1,Ssa#XM_014164945.1,Ssa#XM_014164945.1,Ssa#XM_014164945.1,Ssa#XM_014164945.1,Ssa#XM_014164945.1	ssa-miR-17-5p,ssa-miR-106a-5p,ssa-miR-106b-5p,ssa-miR-93a-5p,ssa-miR-146b-5p,ssa-miR-18bc-5p,ssa-miR-222a-5p,ssa-miR-146d-5p,ssa-miR-214-1-2-3p,ssa-miR-novel-16-5p,ssa-miR-146a-5p,ssa-miR-216c-3p,ssa-miR-20a-5p	sentrin-specific protease 7-like isoform X1	proteolysis,cysteine-type peptidase activity
senp6	GIYK01016147,GIYK01016145,GIYK01016144	Ssa#XM_014204914.1,Ssa#XM_014204914.1,Ssa#XM_014204914.1	ssa-miR-15e-5p,ssa-miR-novel-13-5p,ssa-miR-15d-5p,ssa-miR-457ab-5p,ssa-miR-214-1-2-3p	sentrin-specific protease 6 isoform X3,sentrin-specific protease 6 isoform X1	proteolysis,cysteine-type peptidase activity
SEMA6D	GIYK01058107	Ssa#XM_014177243.1	ssa-miR-122-2-3p	semaphorin-6D-like isoform X1	integral component of membrane,semaphorin receptor binding
SEMA6A	GIYK01047715,GIYK01047714,GIYK01047713	Ssa#XM_014160956.1,Ssa#XM_014160956.1,Ssa#XM_014160956.1	ssa-miR-8163-5p,ssa-miR-200b-3p	semaphorin-6A-like isoform X1,semaphorin-6A-like isoform X4	integral component of membrane,semaphorin receptor binding
SEMA6A	GIYK01055329,GIYK01055327,GIYK01055328	Ssa#XM_014172532.1,Ssa#XM_014172532.1,Ssa#XM_014172532.1	ssa-miR-8163-5p,ssa-miR-200b-3p	semaphorin-6A-like isoform X1,semaphorin-6A-like isoform X3	integral component of membrane,semaphorin receptor binding
SEMA4G	GIYK01002013,GIYK01002012	Ssa#XM_014124421.1,Ssa#XM_014124421.1	ssa-miR-15e-5p,ssa-miR-218a-5p,ssa-miR-146b-5p,ssa-miR-15d-5p,ssa-miR-146d-5p,ssa-miR-457ab-5p,ssa-miR-novel-16-5p,ssa-miR-146a-5p,ssa-miR-200b-3p	semaphorin-4G-like	integral component of membrane,semaphorin receptor binding
SEMA4A	GIYK01036877,GIYK01036864,GIYK01036861,GIYK01036868,GIYK01036871,GIYK01036859,GIYK01036866,GIYK01036867,GIYK01036869,GIYK01036863,GIYK01036862,GIYK01036874,GIYK01036870,GIYK01036860,GIYK01036876,GIYK01036873,GIYK01036872,GIYK01036875	Ssa#XM_014141578.1,Ssa#XM_014141578.1,Ssa#XM_014141578.1,Ssa#XM_014141578.1,Ssa#XM_014141578.1,Ssa#XM_014141578.1,Ssa#XM_014141578.1,Ssa#XM_014141578.1,Ssa#XM_014141578.1,Ssa#XM_014141578.1,Ssa#XM_014141578.1,Ssa#XM_014141578.1,Ssa#XM_014141578.1,Ssa#XM_014141578.1,Ssa#XM_014141578.1,Ssa#XM_014141578.1,Ssa#XM_014141578.1,Ssa#XM_014141578.1	ssa-miR-221-3p,ssa-miR-222b-3p,ssa-miR-457ab-5p,ssa-miR-205b-5p	semaphorin-4A-like isoform X1	integral component of membrane,semaphorin receptor binding
SEMA4A	GIYK01058180,GIYK01058181,GIYK01058182	Ssa#XM_014177152.1,Ssa#XM_014177152.1,Ssa#XM_014177152.1	ssa-miR-205b-5p,ssa-miR-200b-3p	semaphorin-4A-like isoform X1	integral component of membrane,semaphorin receptor binding
SEM1	GIYK01058733	Ssa#XM_014178471.1	ssa-miR-214-1-2-3p,ssa-miR-214-3-3p	26 proteasome complex subunit DSS1, 26S proteasome complex subunit DSS1
sell	GIYK01016469	Ssa#NM_001193454.1	ssa-miR-30a-1-2-5p,ssa-miR-15e-5p,ssa-miR-30a-3-4-5p,ssa-miR-205b-5p,ssa-miR-15d-5p,ssa-miR-457ab-5p	selenoprotein L	oxidation-reduction process
SELENOT	GIYK01006739,GIYK01006740,GIYK01006738	Ssa#XM_014190131.1,Ssa#XM_014190131.1,Ssa#XM_014212475.1	ssa-miR-205b-5p,ssa-miR-19a-2-3p	selenoprotein T1a-like	endoplasmic reticulum membrane,integral component of membrane,oxidation-reduction process,thioredoxin-disulfide reductase activity,cellular oxidant detoxification,endoplasmic reticulum
SELENOO	GIYK01025719	Ssa#XM_014125348.1	ssa-miR-222a-5p	selenoprotein O
SELENON	GIYK01000193,GIYK01000194,GIYK01000195,GIYK01000196	Ssa#XM_014129048.1,Ssa#XM_014129048.1,Ssa#XM_014129048.1,Ssa#XM_014129048.1	ssa-miR-8163-5p,ssa-miR-301a-5p	selenoprotein N	,integral component of membrane,calcium ion binding
SECISBP2	GIYK01054970,GIYK01054971	Ssa#XM_014171539.1,Ssa#XM_014171539.1	ssa-miR-214-3-3p	selenocysteine insertion sequence-binding protein 2 isoform X1	selenocysteine insertion sequence binding
SECISBP2	GIYK01055055,GIYK01054972	Ssa#XM_014171539.1,Ssa#XM_014171539.1	ssa-miR-214-3-3p	selenocysteine insertion sequence-binding protein 2-like	selenocysteine insertion sequence binding
SEC62	GIYK01006493	Ssa#XM_014176462.1	ssa-miR-15e-5p,ssa-miR-146b-5p,ssa-miR-15d-5p,ssa-miR-146d-5p,ssa-miR-457ab-5p,ssa-miR-novel-16-5p,ssa-miR-146a-5p,ssa-miR-8163-5p,ssa-miR-301a-5p,ssa-miR-214-3-3p,ssa-miR-200b-3p	translocation protein SEC62-like isoform X1	integral component of endoplasmic reticulum membrane,protein transport
SEC31A	GIYK01002588,GIYK01002578,GIYK01002587,GIYK01002580,GIYK01002577,GIYK01002584,GIYK01002586,GIYK01002572	Ssa#XM_014127057.1,Ssa#XM_014127057.1,Ssa#XM_014127057.1,Ssa#XM_014127057.1,Ssa#XM_014127057.1,Ssa#XM_014127057.1,Ssa#XM_014127057.1,Ssa#XM_014127057.1	ssa-miR-15d-5p,ssa-miR-15e-5p	protein transport protein Sec31A-like isoform X5,protein transport protein Sec31A isoform X3,protein transport protein Sec31A isoform X9	cytoplasm,protein binding,endoplasmic reticulum to Golgi vesicle-mediated transport
SEC31A	GIYK01002575,GIYK01002576,GIYK01002585,GIYK01002581,GIYK01002582	Ssa#XM_014127057.1,Ssa#XM_014127057.1,Ssa#XM_014127057.1,Ssa#XM_014127057.1,Ssa#XM_014127057.1	ssa-miR-15d-5p,ssa-miR-15e-5p	protein transport protein Sec31A-like isoform X5,protein transport protein Sec31A isoform X9	cytoplasm,protein binding,endoplasmic reticulum to Golgi vesicle-mediated transport
SEC31A	GIYK01002573,GIYK01002583	Ssa#XM_014127057.1,Ssa#XM_014127057.1	ssa-miR-15d-5p,ssa-miR-15e-5p	protein transport protein Sec31A-like isoform X7	COPII-coated vesicle cargo loading,digestive system development,endoplasmic reticulum exit site,protein binding,intracellular protein transport,COPII vesicle coat,endoplasmic reticulum organization,liver development,structural molecule activity
SEC31A	GIYK01002579	Ssa#XM_014127057.1	ssa-miR-15d-5p,ssa-miR-15e-5p	protein transport protein Sec31A-like isoform X6	cytoplasm,protein binding,endoplasmic reticulum to Golgi vesicle-mediated transport
SEC24C	GIYK01046494,GIYK01046496	Ssa#XM_014158200.1,Ssa#XM_014158200.1	ssa-miR-15e-3p	protein transport protein Sec24C-like isoform X1	COPII vesicle coat,zinc ion binding,intracellular protein transport,endoplasmic reticulum to Golgi vesicle-mediated transport
SEC24C	GIYK01046495	Ssa#XM_014158200.1	ssa-miR-15e-3p	protein transport protein Sec24C-like isoform X1	COPII vesicle coat,zinc ion binding,intracellular protein transport,endoplasmic reticulum to Golgi vesicle-mediated transport
sec23a	GIYK01020276,GIYK01000934,GIYK01000932,GIYK01000933	Ssa#XM_014211225.1,Ssa#XM_014194543.1,Ssa#XM_014194543.1,Ssa#XM_014194543.1	ssa-miR-200b-3p,ssa-miR-222a-5p,ssa-miR-203b-3p,ssa-miR-214-1-2-3p,ssa-miR-novel-16-5p,ssa-miR-214-3-3p	protein transport protein Sec23A	endoplasmic reticulum membrane,embryonic neurocranium morphogenesis,Golgi membrane,cytosol,cartilage development,intracellular protein transport,COPII vesicle coat,COPII-coated vesicle budding,endoplasmic reticulum,pectoral fin morphogenesis,zinc ion binding
SEC22B	GIYK01034996	Ssa#NM_001140914.2	ssa-miR-novel-16-5p	vesicle-trafficking protein SEC22b-B-like	integral component of membrane,vesicle-mediated transport
SEC14L1	GIYK01008837,GIYK01008838,GIYK01008836	Ssa#XM_014203526.1,Ssa#XM_014203526.1,Ssa#XM_014203526.1	ssa-miR-101b-3p,ssa-miR-214-3-3p,ssa-miR-101a-3p,ssa-miR-18bc-5p	SEC14-like protein 1 isoform X1
SEC14L1	GIYK01015053,GIYK01015057,GIYK01015049,GIYK01015054,GIYK01015052,GIYK01015055,GIYK01015047,GIYK01015051,GIYK01015048,GIYK01015050,GIYK01015056,GIYK01015046	Ssa#XM_014203526.1,Ssa#XM_014193602.1,Ssa#XM_014203526.1,Ssa#XM_014203526.1,Ssa#XM_014193602.1,Ssa#XM_014203526.1,Ssa#XM_014203526.1,Ssa#XM_014203526.1,Ssa#XM_014203526.1,Ssa#XM_014203526.1,Ssa#XM_014193602.1,Ssa#XM_014203526.1	ssa-miR-18bc-5p	SEC14-like protein 1 isoform X1
sec13	GIYK01052759	Ssa#NM_001140768.1	ssa-miR-203b-3p,ssa-miR-206-3p	protein SEC13 homolog	extracellular matrix constituent secretion,nuclear pore outer ring,Golgi membrane,cytosol,positive regulation of TORC1 signaling,digestive system development,retina layer formation,cartilage development,protein binding,endoplasmic reticulum exit site,COPII vesicle coat,endoplasmic reticulum organization,liver development,structural molecule activity,COPII-coated vesicle budding,eye photoreceptor …
SDHAF3	GIYK01037057	Ssa#XM_014142444.1	ssa-miR-101b-3p,ssa-miR-101a-3p	succinate dehydrogenase assembly factor 3, mitochondrial	mitochondrion,mitochondrial respiratory chain complex II assembly
SDHAF3	GIYK01037058	Ssa#XM_014142444.1	ssa-miR-101b-3p,ssa-miR-216c-3p,ssa-miR-101a-3p	succinate dehydrogenase assembly factor 3, mitochondrial	mitochondrion,mitochondrial respiratory chain complex II assembly
SDHAF2	GIYK01027060	Ssa#XM_014127128.1	ssa-miR-1-3p,ssa-miR-206-3p,ssa-miR-146b-5p,ssa-miR-146d-5p,ssa-miR-146a-5p,ssa-miR-200b-3p	succinate dehydrogenase assembly factor 2, mitochondrial-like
sdha	GIYK01065862	Ssa#XM_014147839.1	ssa-miR-93a-5p,ssa-miR-106a-5p,ssa-miR-106b-5p,ssa-miR-17-5p,ssa-miR-novel-16-5p,ssa-miR-20a-5p	succinate dehydrogenase [ubiquinone] flavoprotein subunit, mitochondrial	tricarboxylic acid cycle,electron transport chain,flavin adenine dinucleotide binding,mitochondrial inner membrane,succinate dehydrogenase (ubiquinone) activity
sdha	GIYK01065863	Ssa#XM_014147839.1	ssa-miR-93a-5p,ssa-miR-106a-5p,ssa-miR-106b-5p,ssa-miR-17-5p,ssa-miR-novel-16-5p,ssa-miR-20a-5p	succinate dehydrogenase [ubiquinone] flavoprotein subunit, mitochondrial	tricarboxylic acid cycle,electron transport chain,flavin adenine dinucleotide binding,mitochondrial inner membrane,succinate dehydrogenase (ubiquinone) activity
SDF4	GIYK01039804,GIYK01039803	Ssa#XM_014146855.1,Ssa#XM_014146855.1	ssa-miR-222a-5p,ssa-miR-216c-3p,ssa-miR-200b-3p	45 kDa calcium-binding protein	sprouting angiogenesis,calcium ion binding
SDC2	GIYK01036545,GIYK01036548,GIYK01036547	Ssa#NM_001146396.1,Ssa#NM_001146396.1,Ssa#NM_001146396.1	ssa-miR-200b-3p	Syndecan	membrane
SDC2	GIYK01057819	Ssa#NM_001146396.1	ssa-miR-301a-5p	syndecan-2-A-like	integral component of membrane,digestive tract development,epiboly involved in gastrulation with mouth forming second,Kupffer's vesicle development,cell migration involved in heart development,sprouting angiogenesis,supramolecular fiber organization
SDC2	GIYK01036546	Ssa#NM_001146396.1	ssa-miR-200b-3p	syndecan-2-A-like	integral component of membrane
SDC2	GIYK01003899,GIYK01003900	Ssa#XM_014202105.1,Ssa#XM_014202105.1	ssa-miR-15e-5p,ssa-miR-218a-5p,ssa-miR-18bc-5p,ssa-miR-15d-5p,ssa-miR-203b-3p,ssa-miR-457ab-5p,ssa-miR-200b-3p	syndecan-2-like	integral component of membrane
SDC2	GIYK01057820	Ssa#NM_001146396.1	ssa-miR-8163-3p
SCYL1	GIYK01012030	Ssa#XM_014198940.1	ssa-miR-novel-13-5p,ssa-miR-200b-3p	N-terminal kinase-like protein isoform X2	protein kinase activity,ATP binding,protein phosphorylation
SCYL1	GIYK01021499	Ssa#XM_014212916.1	ssa-miR-novel-13-5p,ssa-miR-206-3p	N-terminal kinase-like protein isoform X3	protein kinase activity,ATP binding,protein phosphorylation
scrn3	GIYK01050332,GIYK01050333,GIYK01050329,GIYK01050330,GIYK01050331	Ssa#XM_014164018.1,Ssa#XM_014164018.1,Ssa#XM_014164018.1,Ssa#XM_014164018.1,Ssa#XM_014164018.1	ssa-miR-30a-1-2-5p,ssa-miR-15e-5p,ssa-miR-30a-3-4-5p,ssa-miR-15d-5p,ssa-miR-457ab-5p	secernin-3	proteolysis,dipeptidase activity
SCOC	GIYK01012475	Ssa#XM_014199616.1	ssa-miR-125b-1-3p	short coiled-coil protein B-like
SCO1	GIYK01008925,GIYK01008924	Ssa#XM_014193730.1,Ssa#XM_014193730.1	ssa-miR-30a-1-2-5p,ssa-miR-30a-3-4-5p,ssa-miR-novel-13-5p,ssa-miR-205b-5p	protein SCO1 homolog, mitochondrial-like	respiratory chain complex IV assembly,copper ion transport,copper ion binding,mitochondrial inner membrane,cellular copper ion homeostasis
SCO1	GIYK01008926	Ssa#XM_014193730.1	ssa-miR-30a-1-2-5p,ssa-miR-30a-3-4-5p,ssa-miR-novel-13-5p,ssa-miR-205b-5p	protein SCO1 homolog, mitochondrial-like isoform X2
SCHIP1	GIYK01022488	Ssa#XM_014162524.1	ssa-miR-novel-16-3p	schwannomin-interacting protein 1-like isoform X2
SCD	GIYK01001702,GIYK01044900,GIYK01001700,GIYK01044903,GIYK01001701,GIYK01044906,GIYK01001699,GIYK01044901	Ssa#XM_014206441.1,Ssa#XM_014206441.1,Ssa#XM_014206441.1,Ssa#XM_014206441.1,Ssa#XM_014206441.1,Ssa#XM_014206441.1,Ssa#XM_014206441.1,Ssa#XM_014206441.1	ssa-miR-101b-3p,ssa-miR-222b-3p,ssa-miR-101a-3p,ssa-miR-17-5p,ssa-miR-106a-5p,ssa-miR-106b-5p,ssa-miR-93a-5p,ssa-miR-146b-5p,ssa-miR-205b-5p,ssa-miR-221-3p,ssa-miR-146d-5p,ssa-miR-216c-3p,ssa-miR-novel-12-5p,ssa-miR-301a-5p,ssa-miR-214-3-3p,ssa-miR-20a-5p,ssa-miR-200b-3p	acyl-CoA desaturase-like	oxidoreductase activity acting on paired donors with oxidation of a pair of donors resulting in the reduction of molecular oxygen to two molecules of water,fatty acid biosynthetic process,oxidation-reduction process,integral component of membrane
SCCPDH	GIYK01000252	Ssa#XM_014141677.1	ssa-miR-15e-5p,ssa-miR-218a-5p,ssa-miR-15d-5p,ssa-miR-457ab-5p,ssa-miR-8163-5p	saccharopine dehydrogenase-like oxidoreductase	oxidation-reduction process,integral component of membrane,oxidoreductase activity
SCARB2	GIYK01047915,GIYK01047917,GIYK01047918,GIYK01047916	Ssa#XM_014160603.1,Ssa#XM_014160603.1,Ssa#XM_014160603.1,Ssa#XM_014160603.1	ssa-miR-15e-5p,ssa-miR-218a-5p,ssa-miR-17-5p,ssa-miR-106a-5p,ssa-miR-106b-5p,ssa-miR-222a-5p,ssa-miR-15d-5p,ssa-let-7e-5p,ssa-miR-203b-3p,ssa-miR-457ab-5p,ssa-miR-214-1-2-3p,ssa-miR-novel-12-5p,ssa-miR-8163-5p,ssa-miR-301a-5p,ssa-miR-214-3-3p,ssa-miR-20a-5p,ssa-miR-200b-3p	lysosome membrane protein 2-like isoform X1	integral component of membrane,lysosome,scavenger receptor activity,endocytosis,notochord development
SCARB1	GIYK01027586	Ssa#XM_014127943.1	ssa-miR-novel-1-3p	scavenger receptor class B type I isoform X1
SCAMP1	GIYK01027666,GIYK01027665	Ssa#XM_014214075.1,Ssa#XM_014214075.1	ssa-miR-1-3p,ssa-miR-301a-5p,ssa-miR-novel-16-5p,ssa-miR-206-3p	secretory carrier-associated membrane protein 1-like isoform X1	integral component of membrane,protein transport
SCAF11	GIYK01043887	Ssa#XM_014153567.1	ssa-miR-15e-3p,ssa-miR-novel-2-5p	protein SCAF11-like isoform X1
SAT1	GIYK01028462	Ssa#XM_014129305.1	ssa-miR-142b-5p	diamine acetyltransferase 1-like	diamine N-acetyltransferase activity,protein binding
SASH1	GIYK01020376,GIYK01020377	Ssa#XM_014211379.1,Ssa#XM_014211379.1	ssa-miR-221-3p,ssa-miR-222b-3p,ssa-miR-214-3-3p	SAM and SH3 domain-containing protein 1-like isoform X1	protein binding
SARS1	GIYK01040004	Ssa#XM_014147214.1	ssa-miR-novel-16-3p	serine--tRNA ligase, cytoplasmic	seryl-tRNA aminoacylation,negative regulation of vascular endothelial growth factor production,cerebellum vasculature development,branching involved in blood vessel morphogenesis,ATP binding,negative regulation of sprouting angiogenesis,serine-tRNA ligase activity,nucleus
SAP3	GIYK01021702,GIYK01021701,GIYK01021700	Ssa#XM_014213262.1,Ssa#XM_014213262.1,Ssa#XM_014213262.1	ssa-miR-101b-3p,ssa-miR-15e-5p,ssa-miR-101a-3p,ssa-miR-15d-5p,ssa-miR-457ab-5p,ssa-miR-214-1-2-3p	ganglioside GM2 activator-like	ganglioside catabolic process,enzyme activator activity,positive regulation of catalytic activity
SAMD9L	GIYK01009185,GIYK01009186	Ssa#XM_014194110.1,Ssa#XM_014194110.1	ssa-miR-101b-3p,ssa-miR-101a-3p,ssa-miR-146b-5p,ssa-miR-146d-5p,ssa-miR-146a-5p	sterile alpha motif domain-containing protein 9-like	protein binding
SAMD9L	GIYK01014656,GIYK01014657,GIYK01014658,GIYK01014659	Ssa#XM_014203024.1,Ssa#XM_014203024.1,Ssa#XM_014203024.1,Ssa#XM_014203024.1	ssa-miR-221-3p,ssa-miR-222b-3p,ssa-miR-216c-3p,ssa-miR-205b-5p	sterile alpha motif domain-containing protein 9-like	protein binding
SAFB2	GIYK01023512	Ssa#XM_014216223.1	ssa-miR-8163-5p	scaffold attachment factor B2-like isoform X2	regulation of mRNA processing,RNA binding,regulation of transcription DNA-templated
s39ad	GIYK01057266	Ssa#NM_001173795.1	ssa-miR-18bc-5p	zinc transporter ZIP13-like	integral component of membrane,metal ion transmembrane transporter activity,transmembrane transport,metal ion transport
s39ab	GIYK01059059,GIYK01046644,GIYK01059061,GIYK01059060,GIYK01046643,GIYK01059058	Ssa#NM_001173736.1,Ssa#XM_014158407.1,Ssa#NM_001173736.1,Ssa#NM_001173736.1,Ssa#XM_014158407.1,Ssa#NM_001173736.1	ssa-miR-101b-3p,ssa-miR-1-3p,ssa-miR-101a-3p,ssa-miR-205b-5p,ssa-miR-203b-3p,ssa-miR-206-3p,ssa-miR-216c-3p,ssa-miR-214-3-3p	zinc transporter ZIP11 isoform X2,zinc transporter ZIP11 isoform X1	integral component of membrane,metal ion transmembrane transporter activity,transmembrane transport,metal ion transport
S35B4	GIYK01026172,GIYK01026173,GIYK01026169	Ssa#XM_014125838.1,Ssa#XM_014125838.1,Ssa#XM_014125838.1	ssa-miR-101b-3p,ssa-miR-301a-5p,ssa-miR-101a-3p,ssa-miR-122-2-3p	UDP-xylose and UDP-N-acetylglucosamine transporter-like isoform X3	transmembrane transport
S35B4	GIYK01026170,GIYK01026171	Ssa#XM_014125838.1,Ssa#XM_014125838.1	ssa-miR-101b-3p,ssa-miR-301a-5p,ssa-miR-101a-3p,ssa-miR-122-2-3p	UDP-xylose and UDP-N-acetylglucosamine transporter	integral component of membrane,transmembrane transport
s35b1	GIYK01009057	Ssa#NM_001140406.1	ssa-miR-novel-16-3p	Solute carrier family 35 member B1	integral component of membrane,transmembrane transport
S26A2	GIYK01034461	Ssa#XM_014138168.1	ssa-miR-15e-5p,ssa-miR-18bc-5p,ssa-miR-15d-5p,ssa-miR-457ab-5p,ssa-miR-novel-16-5p	sulfate transporter-like	secondary active sulfate transmembrane transporter activity,sulfate transmembrane transport,anion:anion antiporter activity,integral component of plasma membrane,oxalate transport,chloride transmembrane transport,oxalate transmembrane transporter activity,chloride transmembrane transporter activity
S1PR4	GIYK01041130,GIYK01041128,GIYK01041132,GIYK01041129	Ssa#XM_014136750.1,Ssa#XM_014136750.1,Ssa#NM_001141160.1,Ssa#XM_014136750.1	ssa-miR-17-5p,ssa-miR-106a-5p,ssa-miR-106b-5p,ssa-miR-93a-5p,ssa-miR-222a-5p,ssa-miR-20a-5p	sphingosine 1-phosphate receptor 4-like	integral component of membrane,sphingosine-1-phosphate receptor activity,sphingosine-1-phosphate receptor signaling pathway,neutrophil chemotaxis
S1PR4	GIYK01041131	Ssa#XM_014136750.1	ssa-miR-17-5p,ssa-miR-106a-5p,ssa-miR-106b-5p,ssa-miR-93a-5p,ssa-miR-222a-5p,ssa-miR-20a-5p	sphingosine 1-phosphate receptor 4-like	integral component of membrane,G protein-coupled receptor signaling pathway,sphingosine-1-phosphate receptor activity
S1PR3	GIYK01053603	Ssa#XM_014169709.1	ssa-miR-125b-1-3p,ssa-let-7b-3p,ssa-miR-455-3p,ssa-let-7j-3p	sphingosine 1-phosphate receptor 3-like	sphingosine-1-phosphate receptor activity,sphingosine-1-phosphate receptor signaling pathway,integral component of membrane
S100P	GIYK01061370,GIYK01061397,GIYK01014222	Ssa#XM_014202067.1,Ssa#XM_014202067.1,Ssa#XM_014202067.1	ssa-miR-novel-16-5p	ictacalcin-like, Protein S100, S100 calcium-binding protein	transition metal ion binding,calcium ion binding
RXRG	GIYK01006767,GIYK01006769,GIYK01006768	Ssa#XM_014190166.1,Ssa#XM_014190166.1,Ssa#XM_014190166.1	ssa-miR-301a-5p	retinoic acid receptor RXR-gamma-A-like isoform X1	steroid hormone receptor activity,steroid hormone mediated signaling pathway,sequence-specific DNA binding,DNA-binding transcription factor activity,host cell nucleus,regulation of transcription DNA-templated,nucleus,zinc ion binding
RXRB	GIYK01058010,GIYK01058012,GIYK01058003,GIYK01058009,GIYK01058005,GIYK01058007,GIYK01058011,GIYK01058004,GIYK01058008	Ssa#XM_014141731.1,Ssa#XM_014141731.1,Ssa#XM_014141731.1,Ssa#XM_014141731.1,Ssa#XM_014141731.1,Ssa#XM_014141731.1,Ssa#XM_014141731.1,Ssa#XM_014141731.1,Ssa#XM_014141731.1	ssa-miR-101b-3p,ssa-miR-101a-3p,ssa-miR-17-5p,ssa-miR-106a-5p,ssa-miR-106b-5p,ssa-miR-93a-5p,ssa-miR-20a-5p,ssa-miR-19a-2-3p	retinoic acid receptor RXR-beta-A isoform X3,retinoic acid receptor RXR-beta-A isoform X6,retinoic acid receptor RXR-beta-A isoform X2,retinoic acid receptor RXR-beta-A isoform X8,retinoic acid receptor RXR-beta-A isoform X1	negative regulation of transcription DNA-templated,regulation of transcription by RNA polymerase II,steroid hormone receptor activity,steroid hormone mediated signaling pathway,sequence-specific DNA binding,DNA-binding transcription factor activity,host cell nucleus,DNA-binding transcription factor activity RNA polymerase II-specific,regulation of transcription DNA-templated,nucleus,zinc ion bind…
RXRB	GIYK01058006	Ssa#XM_014141731.1	ssa-miR-101b-3p,ssa-miR-101a-3p,ssa-miR-17-5p,ssa-miR-106a-5p,ssa-miR-106b-5p,ssa-miR-93a-5p,ssa-miR-20a-5p,ssa-miR-19a-2-3p	retinoic acid receptor RXR-beta-A isoform X1	steroid hormone receptor activity,steroid hormone mediated signaling pathway,sequence-specific DNA binding,DNA-binding transcription factor activity,host cell nucleus,regulation of transcription DNA-templated,nucleus,zinc ion binding
ruvb1	GIYK01030561	Ssa#NM_001140347.1	ssa-miR-146d-5p	RuvB-like 1	DNA recombination,5'-3' DNA helicase activity,ATP binding,Ino80 complex,DNA repair,R2TP complex,DNA duplex unwinding,NuA4 histone acetyltransferase complex
rufy3	GIYK01037601,GIYK01037603,GIYK01037602	Ssa#XM_014143555.1,Ssa#XM_014143555.1,Ssa#XM_014143555.1	ssa-miR-novel-16-5p,ssa-miR-18bc-5p	protein RUFY3 isoform X1	metal ion binding
RTRAF	GIYK01019399,GIYK01019400	Ssa#XM_014210034.1,Ssa#XM_014210034.1	ssa-miR-146d-5p,ssa-miR-146b-5p,ssa-miR-146a-5p	RNA transcription, translation and transport factor protein isoform X1,UPF0568 protein C14orf166 homolog isoform X2
RTN3	GIYK01045167,GIYK01045168	Ssa#XM_014155628.1,Ssa#XM_014155628.1	ssa-miR-222b-3p,ssa-miR-novel-13-5p,ssa-miR-221-3p,ssa-miR-457ab-5p,ssa-miR-206-3p,ssa-miR-301a-5p,ssa-miR-214-3-3p	reticulon-3-like isoform X3	endoplasmic reticulum membrane,integral component of membrane,endoplasmic reticulum
RTN3	GIYK01045170	Ssa#XM_014155628.1	ssa-miR-222b-3p,ssa-miR-novel-13-5p,ssa-miR-221-3p,ssa-miR-457ab-5p,ssa-miR-206-3p,ssa-miR-301a-5p,ssa-miR-214-3-3p
RTN3	GIYK01045169	Ssa#XM_014155628.1	ssa-miR-222b-3p,ssa-miR-novel-13-5p,ssa-miR-221-3p,ssa-miR-457ab-5p,ssa-miR-206-3p,ssa-miR-301a-5p,ssa-miR-214-3-3p	reticulon-3-like isoform X2	endoplasmic reticulum membrane,integral component of membrane,endoplasmic reticulum
RTN1	GIYK01000656,GIYK01019992,GIYK01019991	Ssa#XM_014210748.1,Ssa#XM_014210748.1,Ssa#XM_014210748.1	ssa-miR-218a-5p,ssa-miR-146d-5p,ssa-miR-146b-5p,ssa-miR-146a-5p	reticulon-1-A-like isoform X3,reticulon-1-like isoform X1	endoplasmic reticulum membrane,integral component of membrane,endoplasmic reticulum
rtn1	GIYK01000657,GIYK01019994,GIYK01019995,GIYK01019993	Ssa#XM_014210748.1,Ssa#XM_014210748.1,Ssa#XM_014210748.1,Ssa#XM_014210748.1	ssa-miR-218a-5p,ssa-miR-146d-5p,ssa-miR-146b-5p,ssa-miR-146a-5p	reticulon-1-A-like isoform X3,reticulon-1-A-like isoform X2	endoplasmic reticulum membrane,integral component of membrane,endoplasmic reticulum
RTF2	GIYK01052671,GIYK01052668	Ssa#XM_014168125.1,Ssa#XM_014168125.1	ssa-miR-153a-3p	protein RTF2 homolog isoform X1,protein RTF2 homolog isoform X2	mitotic DNA replication termination,nucleus
RTF2	GIYK01052669	Ssa#XM_014168125.1	ssa-miR-153a-3p	protein RTF2 homolog isoform X1,protein RTF2 homolog isoform X2	mitotic DNA replication termination
rtca	GIYK01023309	Ssa#XM_014216017.1	ssa-miR-15d-5p,ssa-miR-15e-5p,ssa-miR-457ab-5p,ssa-miR-214-3-3p	RNA 3'-terminal phosphate cyclase-like	ATP binding,RNA-3'-phosphate cyclase activity,nucleus,RNA processing
rtca	GIYK01023310	Ssa#XM_014216017.1	ssa-miR-15d-5p,ssa-miR-15e-5p,ssa-miR-457ab-5p,ssa-miR-214-3-3p	RNA 3'-terminal phosphate cyclase isoform X3	ATP binding,RNA-3'-phosphate cyclase activity,RNA processing
RT36	GIYK01054418	Ssa#XM_014170776.1	ssa-miR-214-1-2-3p	28S ribosomal protein S36, mitochondrial-like isoform X2	ribosome
RT36	GIYK01054419	Ssa#XM_014170776.1	ssa-miR-222b-3p,ssa-miR-221-3p,ssa-miR-214-1-2-3p,ssa-miR-206-3p,ssa-miR-214-3-3p	28S ribosomal protein S36, mitochondrial-like isoform X2
RT33	GIYK01061113,GIYK01061116,GIYK01061117,GIYK01061118	Ssa#XM_014141497.1,Ssa#XM_014141497.1,Ssa#XM_014141497.1,Ssa#XM_014141497.1	ssa-miR-101b-3p,ssa-miR-101a-3p,ssa-miR-novel-13-5p,ssa-miR-15d-5p,ssa-miR-203b-3p,ssa-miR-462b-5p,ssa-miR-457ab-5p	28S ribosomal protein S33, mitochondrial	ribosome
RT31	GIYK01010108	Ssa#XM_014195875.1	ssa-miR-17-5p,ssa-miR-106a-5p,ssa-miR-106b-5p,ssa-miR-93a-5p,ssa-miR-216c-3p,ssa-miR-20a-5p	28S ribosomal protein S31, mitochondrial	mitochondrial small ribosomal subunit,structural constituent of ribosome
RT23	GIYK01022881,GIYK01022880	Ssa#XM_014163224.1,Ssa#XM_014163224.1	ssa-miR-15e-5p,ssa-miR-15d-5p,ssa-miR-457ab-5p,ssa-miR-novel-16-5p,ssa-miR-214-3-3p	28S ribosomal protein S23, mitochondrial-like	translation,mitochondrion,ribosome,structural constituent of ribosome
RT16	GIYK01030806,GIYK01030807	Ssa#XM_014133614.1,Ssa#XM_014133614.1	ssa-miR-30a-1-2-5p,ssa-miR-200b-3p	28S ribosomal protein S16, mitochondrial-like	translation,ribosome,structural constituent of ribosome
RT16	GIYK01030808	Ssa#XM_014133614.1	ssa-miR-30a-1-2-5p,ssa-miR-200b-3p	28S ribosomal protein S16, mitochondrial-like	translation,ribosome,structural constituent of ribosome
RSL1D1	GIYK01001785,GIYK01001784	Ssa#XM_014208462.1,Ssa#XM_014208462.1	ssa-miR-203b-3p	ribosomal L1 domain-containing protein 1
RS6	GIYK01018964	Ssa#XM_014195671.1	ssa-miR-216c-3p	40S ribosomal protein S6	glucose homeostasis,cytosolic small ribosomal subunit,translation,structural constituent of ribosome,nucleus
RS5	GIYK01036482	Ssa#XM_014142017.1	ssa-miR-30a-1-2-5p,ssa-miR-30a-3-4-5p,ssa-miR-30e-5p,ssa-miR-101a-3p	40S ribosomal protein S5	translation,structural constituent of ribosome,RNA binding,small ribosomal subunit
RS3	GIYK01011286	Ssa#XM_014197714.1	ssa-miR-15d-5p,ssa-miR-15e-5p,ssa-miR-457ab-5p,ssa-miR-214-1-2-3p	40S ribosomal protein S3	translation,structural constituent of ribosome,RNA binding,small ribosomal subunit
RS27	GIYK01041072	Ssa#XM_014148686.1	ssa-miR-203b-3p,ssa-miR-200b-3p	40S ribosomal protein S27-like	translation,ribosome,metal ion binding,structural constituent of ribosome
RS10	GIYK01039506	Ssa#XM_014146384.1	ssa-miR-8163-5p	40S ribosomal protein S10	ribosome
rrp9	GIYK01052351,GIYK01052352	Ssa#XM_014167810.1,Ssa#XM_014167810.1	ssa-miR-novel-1-3p,ssa-miR-205b-5p	U3 small nucleolar RNA-interacting protein 2 isoform X2	protein binding,U3 snoRNA binding,rRNA processing
RRP7A	GIYK01015435	Ssa#XM_014203740.1	ssa-miR-153a-3p,ssa-miR-novel-16-3p	ribosomal RNA-processing protein 7 homolog A-like	RNA binding
RRP15	GIYK01012893	Ssa#XM_014125394.1	ssa-miR-222b-3p,ssa-miR-novel-13-5p,ssa-miR-222a-5p,ssa-miR-18bc-5p,ssa-miR-221-3p,ssa-miR-216c-3p	RRP15-like protein	rRNA processing
RRM1	GIYK01010830,GIYK01034067,GIYK01010832,GIYK01034065,GIYK01010829,GIYK01034066,GIYK01010831,GIYK01010833	Ssa#NM_001140513.1,Ssa#XM_014139926.1,Ssa#NM_001140513.1,Ssa#XM_014139926.1,Ssa#NM_001140513.1,Ssa#XM_014139926.1,Ssa#NM_001140513.1,Ssa#NM_001140513.1	ssa-miR-101b-3p,ssa-miR-222b-3p,ssa-miR-17-5p,ssa-miR-106a-5p,ssa-miR-106b-5p,ssa-miR-93a-5p,ssa-miR-146b-5p,ssa-miR-222a-5p,ssa-miR-221-3p,ssa-miR-146d-5p,ssa-miR-novel-16-5p,ssa-miR-146a-5p,ssa-miR-8163-5p,ssa-miR-216c-3p,ssa-miR-20a-5p	Ribonucleoside-diphosphate reductase large subunit,ribonucleoside-diphosphate reductase large subunit	ATP binding,ribonucleoside-diphosphate reductase activity thioredoxin disulfide as acceptor,oxidation-reduction process,DNA replication
rras2	GIYK01057326	Ssa#XM_014176000.1	ssa-miR-novel-13-5p,ssa-miR-222a-5p,ssa-miR-146d-5p,ssa-miR-146a-5p,ssa-miR-214-3-3p	ras-related protein R-Ras2	GTP binding,Ras protein signal transduction,GDP binding,GTPase activity,plasma membrane
rras2	GIYK01057327	Ssa#XM_014127158.1	ssa-miR-222a-5p,ssa-miR-146d-5p,ssa-miR-novel-13-5p,ssa-miR-146a-5p	ras-related protein R-Ras2	GTP binding,Ras protein signal transduction,GDP binding,GTPase activity,plasma membrane
rragc	GIYK01005053	Ssa#NM_001146468.1	ssa-miR-1-3p,ssa-miR-218a-5p,ssa-miR-222a-5p,ssa-miR-206-3p,ssa-miR-551a-3p,ssa-miR-216c-3p	ras-related GTP-binding protein C	cellular response to amino acid stimulus,positive regulation of TOR signaling,lysosome,GTP binding
rragc	GIYK01005054	Ssa#NM_001146468.1	ssa-miR-1-3p,ssa-miR-218a-5p,ssa-miR-206-3p,ssa-miR-551a-3p,ssa-miR-216c-3p	ras-related GTP-binding protein C	cellular response to amino acid stimulus,positive regulation of TOR signaling,lysosome,GTP binding
rragc	GIYK01005056	Ssa#NM_001146468.1	ssa-miR-1-3p,ssa-miR-218a-5p,ssa-miR-206-3p,ssa-miR-551a-3p,ssa-miR-216c-3p	ras-related GTP-binding protein C isoform X2	GTP binding
rqcd1	GIYK01050116	Ssa#NM_001173791.1	ssa-miR-203b-3p,ssa-miR-216c-3p,ssa-miR-214-1-2-3p	CCR4-NOT transcription complex subunit 9	CCR4-NOT complex,mRNA catabolic process
rqcd1	GIYK01050117	Ssa#NM_001173791.1	ssa-miR-203b-3p,ssa-miR-216c-3p	CCR4-NOT transcription complex subunit 9	CCR4-NOT complex,mRNA catabolic process
RPSA	GIYK01015139	Ssa#XM_014203582.1	ssa-miR-457ab-5p	40S ribosomal protein SA isoform X1	translation,structural constituent of ribosome,small ribosomal subunit
RPSA	GIYK01015140	Ssa#XM_014203582.1	ssa-miR-457ab-5p	40S ribosomal protein SA isoform X1	nucleus,laminin receptor activity,ribosomal small subunit assembly,cell adhesion,cytosolic small ribosomal subunit,laminin binding,translation,structural constituent of ribosome,plasma membrane
RPS6KB1	GIYK01019877,GIYK01019878	Ssa#XM_014180272.1,Ssa#XM_014180272.1	ssa-miR-200b-3p	ribosomal protein S6 kinase-like 1 isoform X1	protein kinase activity,ATP binding,protein phosphorylation
RPS28	GIYK01006684	Ssa#XM_014190015.1	ssa-miR-15d-5p,ssa-miR-15e-5p,ssa-miR-203b-3p,ssa-miR-457ab-5p	40S ribosomal protein S28	cytoplasmic side of rough endoplasmic reticulum membrane,ribosomal small subunit assembly,nuclear-transcribed mRNA catabolic process nonsense-mediated decay,protein binding,SRP-dependent cotranslational protein targeting to membrane,RNA binding,translational initiation,centrosome,cytosolic small ribosomal subunit,maturation of SSU-rRNA,viral transcription,polysomal ribosome,structural constituent…
rps23	GIYK01031471	Ssa#XM_014133942.1	ssa-miR-15d-5p,ssa-miR-15e-5p,ssa-miR-457ab-5p,ssa-miR-200b-3p	40S ribosomal protein S23	cytosolic small ribosomal subunit,polysomal ribosome,structural constituent of ribosome,rough endoplasmic reticulum,cytoplasmic translation
RPS14	GIYK01028730	Ssa#NM_001140782.1	ssa-miR-216c-3p	40S ribosomal protein S14	translation,ribosome,structural constituent of ribosome
RPP38	GIYK01004160	Ssa#XM_014182471.1	ssa-miR-15e-3p	ribonuclease P protein subunit p38-like	ribonuclease P activity,RNA phosphodiester bond hydrolysis endonucleolytic,tRNA 5'-leader removal
RPP30	GIYK01059193	Ssa#XM_014179277.1	ssa-miR-17-5p,ssa-miR-106a-5p,ssa-miR-106b-5p,ssa-miR-8163-5p,ssa-miR-216c-3p,ssa-miR-20a-5p	ribonuclease P protein subunit p30-like isoform X1	ribonuclease P activity,tRNA processing
RPP25L	GIYK01004005,GIYK01003999,GIYK01003998,GIYK01004000	Ssa#NM_001141258.1,Ssa#NM_001141258.1,Ssa#NM_001141258.1,Ssa#NM_001141258.1	ssa-miR-301a-5p	ribonuclease P protein subunit p25-like protein	nucleic acid binding
rpp14	GIYK01052794,GIYK01052790,GIYK01052795	Ssa#NM_001140287.1,Ssa#NM_001140287.1,Ssa#NM_001140287.1	ssa-let-7e-5p,ssa-miR-301a-5p	ribonuclease P protein subunit p14	ribonuclease P activity,tRNA processing,RNA phosphodiester bond hydrolysis endonucleolytic
rpp14	GIYK01052797,GIYK01052796,GIYK01052792,GIYK01052788,GIYK01052793	Ssa#NM_001140287.1,Ssa#NM_001140287.1,Ssa#NM_001140287.1,Ssa#NM_001140287.1,Ssa#NM_001140287.1	ssa-let-7e-5p	hydroxyacyl-thioester dehydratase type 2, mitochondrial
RPN2	GIYK01031296,GIYK01031297	Ssa#XM_014133136.1,Ssa#XM_014133136.1	ssa-miR-130a-2-3p	dolichyl-diphosphooligosaccharide--protein glycosyltransferase subunit 2-like isoform X2,dolichyl-diphosphooligosaccharide--protein glycosyltransferase subunit 2-like isoform X1	oligosaccharyltransferase complex,transferase activity,integral component of membrane,protein N-linked glycosylation
RPL5	GIYK01035040,GIYK01035039,GIYK01035042	Ssa#XM_014139909.1,Ssa#XM_014139909.1,Ssa#XM_014139909.1	ssa-miR-novel-16-5p	60S ribosomal protein L5-like isoform X2	5S rRNA binding,translation,ribosome,structural constituent of ribosome
RPL5	GIYK01035041	Ssa#XM_014139909.1	ssa-miR-novel-16-5p	60S ribosomal protein L5-like	5S rRNA binding,translation,ribosome,structural constituent of ribosome
rpe	GIYK01056220	Ssa#NM_001141905.2	ssa-miR-1-3p,ssa-miR-206-3p	ribulose-phosphate 3-epimerase	cytosol,metal ion binding,pentose catabolic process,cellular carbohydrate metabolic process,cilium assembly,pentose-phosphate shunt non-oxidative branch,ribulose-phosphate 3-epimerase activity
rpe	GIYK01056221	Ssa#NM_001141905.2	ssa-miR-1-3p,ssa-miR-206-3p	ribulose-phosphate 3-epimerase	pentose-phosphate shunt,metal ion binding,cilium assembly,ribulose-phosphate 3-epimerase activity,carbohydrate metabolic process
RPC10	GIYK01008352,GIYK01015473,GIYK01008353	Ssa#XM_014204275.1,Ssa#XM_014204275.1,Ssa#XM_014204275.1	ssa-miR-221-3p,ssa-miR-222b-3p,ssa-miR-200b-3p	DNA-directed RNA polymerase III subunit RPC10 isoform X2,DNA-directed RNA polymerase III subunit RPC10	DNA-directed 5'-3' RNA polymerase activity,transcription DNA-templated,nucleic acid binding,nucleolus,hematopoietic stem cell homeostasis,tRNA 3'-trailer cleavage,termination of RNA polymerase III transcription,RNA polymerase III complex,zinc ion binding
RORB	GIYK01007465	Ssa#XM_014171413.1	ssa-miR-17-5p,ssa-miR-106a-5p,ssa-miR-106b-5p,ssa-miR-93a-5p,ssa-miR-8163-5p,ssa-miR-20a-5p	nuclear receptor ROR-beta-like	steroid hormone receptor activity,steroid hormone mediated signaling pathway,sequence-specific DNA binding,intracellular receptor signaling pathway,nuclear receptor activity,host cell nucleus,regulation of transcription DNA-templated,nucleus,zinc ion binding
RORA	GIYK01025454	Ssa#XM_014124802.1	ssa-miR-1-3p,ssa-miR-153a-3p,ssa-miR-218a-5p,ssa-miR-17-5p,ssa-miR-106a-5p,ssa-miR-106b-5p,ssa-miR-93a-5p,ssa-miR-18bc-5p,ssa-miR-15d-5p,ssa-miR-457ab-5p,ssa-miR-206-3p,ssa-miR-301a-5p,ssa-miR-20a-5p,ssa-miR-19a-2-3p	nuclear receptor ROR-alpha isoform X2	steroid hormone receptor activity,steroid hormone mediated signaling pathway,sequence-specific DNA binding,positive regulation of gene expression,intracellular receptor signaling pathway,nuclear receptor activity,host cell nucleus,regulation of transcription DNA-templated,nucleus,zinc ion binding
ROCK1	GIYK01035694,GIYK01035691,GIYK01035697,GIYK01035696,GIYK01035693,GIYK01035695	Ssa#XM_014191784.1,Ssa#XM_014191784.1,Ssa#XM_014191784.1,Ssa#XM_014191784.1,Ssa#XM_014191784.1,Ssa#XM_014191784.1	ssa-miR-15e-5p,ssa-miR-153a-3p,ssa-miR-15d-5p,ssa-miR-457ab-5p,ssa-miR-214-1-2-3p,ssa-miR-122-2-3p	rho-associated protein kinase 1-like isoform X1	negative regulation of adherens junction organization,GTP-Rho binding,metal ion binding,protein serine/threonine kinase activity,positive regulation of stress fiber assembly,actin cytoskeleton organization,ATP binding,intracellular signal transduction,protein phosphorylation,Rho protein signal transduction,Rho GTPase binding,epicardial cell to mesenchymal cell transition,cytoskeleton
ROCK1	GIYK01007280,GIYK01035692,GIYK01007278,GIYK01007279,GIYK01007281	Ssa#XM_014191784.1,Ssa#XM_014191784.1,Ssa#XM_014191784.1,Ssa#XM_014191784.1,Ssa#XM_014191784.1	ssa-miR-101b-3p,ssa-miR-153a-3p,ssa-miR-101a-3p,ssa-miR-novel-16-5p,ssa-miR-122-2-3p	rho-associated protein kinase 1-like isoform X2,rho-associated protein kinase 1-like isoform X1	negative regulation of adherens junction organization,GTP-Rho binding,metal ion binding,protein serine/threonine kinase activity,actin cytoskeleton organization,positive regulation of stress fiber assembly,ATP binding,protein phosphorylation,Rho protein signal transduction,epicardial cell to mesenchymal cell transition,cytoskeleton
robo4	GIYK01033677,GIYK01033676	Ssa#XM_014137188.1,Ssa#XM_014137188.1	ssa-miR-218a-5p,ssa-miR-18bc-5p,ssa-miR-novel-16-5p,ssa-miR-216c-3p,ssa-miR-novel-12-5p	roundabout homolog 4 isoform X2	Roundabout signaling pathway,axon midline choice point recognition,protein binding,axon guidance receptor activity
roa1	GIYK01032901,GIYK01032896,GIYK01032902,GIYK01032899,GIYK01032888,GIYK01032878,GIYK01032879,GIYK01032889,GIYK01032890,GIYK01032893,GIYK01032884,GIYK01032900,GIYK01032897	Ssa#NM_001140763.1,Ssa#NM_001140763.1,Ssa#NM_001140763.1,Ssa#NM_001140763.1,Ssa#NM_001140763.1,Ssa#NM_001140763.1,Ssa#NM_001140763.1,Ssa#NM_001140763.1,Ssa#NM_001140763.1,Ssa#NM_001140763.1,Ssa#NM_001140763.1,Ssa#NM_001140763.1,Ssa#NM_001140763.1	ssa-miR-205b-5p,ssa-miR-214-3-3p	heterogeneous nuclear ribonucleoprotein A1-like isoform X1,heterogeneous nuclear ribonucleoprotein A1-like isoform X2	nucleic acid binding,,RNA binding
roa1	GIYK01039855,GIYK01039860,GIYK01039854,GIYK01039861,GIYK01039857,GIYK01039863	Ssa#NM_001140763.1,Ssa#NM_001140763.1,Ssa#NM_001140763.1,Ssa#NM_001140763.1,Ssa#NM_001140763.1,Ssa#NM_001140763.1	ssa-miR-221-3p,ssa-miR-205b-5p,ssa-miR-214-3-3p	heterogeneous nuclear ribonucleoprotein A1-like isoform X1,heterogeneous nuclear ribonucleoprotein A1-like isoform X2	RNA binding,mRNA binding
ROA0	GIYK01012774	Ssa#XM_014200087.1	ssa-miR-301a-5p	heterogeneous nuclear ribonucleoprotein A0-like	regulation of transcription by RNA polymerase II,cytoplasm,RNA binding,nucleoplasm,RNA polymerase II cis-regulatory region sequence-specific DNA binding
rnh2c	GIYK01012044	Ssa#NM_001140587.1	ssa-miR-15d-5p,ssa-miR-15e-5p,ssa-miR-457ab-5p	Ribonuclease H2 subunit C	RNA catabolic process,ribonuclease H2 complex
rngtt	GIYK01016205,GIYK01016203,GIYK01016201,GIYK01016202,GIYK01016199,GIYK01016204	Ssa#NM_001173757.1,Ssa#NM_001173757.1,Ssa#NM_001173757.1,Ssa#NM_001173757.1,Ssa#NM_001173757.1,Ssa#NM_001173757.1	ssa-miR-222b-3p,ssa-miR-153a-3p,ssa-miR-218a-5p,ssa-miR-221-3p,ssa-miR-novel-16-5p	mRNA-capping enzyme	protein tyrosine phosphatase activity,polynucleotide 5'-phosphatase activity,GTP binding,dephosphorylation,host cell nucleus,7-methylguanosine mRNA capping,mRNA guanylyltransferase activity,peptidyl-tyrosine dephosphorylation,nucleus,polynucleotide 5' dephosphorylation,protein tyrosine/serine/threonine phosphatase activity
rngtt	GIYK01016200	Ssa#NM_001173757.1	ssa-miR-222b-3p,ssa-miR-153a-3p,ssa-miR-218a-5p,ssa-miR-221-3p,ssa-miR-novel-16-5p	mRNA-capping enzyme	protein tyrosine phosphatase activity,polynucleotide 5'-phosphatase activity,GTP binding,host cell nucleus,7-methylguanosine mRNA capping,mRNA guanylyltransferase activity,peptidyl-tyrosine dephosphorylation,nucleus,polynucleotide 5' dephosphorylation,protein tyrosine/serine/threonine phosphatase activity
RNF25	GIYK01052867,GIYK01052866,GIYK01052863,GIYK01052862,GIYK01052865	Ssa#NM_001140529.1,Ssa#NM_001140529.1,Ssa#NM_001140529.1,Ssa#NM_001140529.1,Ssa#NM_001140529.1	ssa-miR-130a-2-3p	E3 ubiquitin-protein ligase RNF25 isoform X1,E3 ubiquitin-protein ligase RNF25 isoform X2	ligase activity,protein ubiquitination,ubiquitin protein ligase activity
RNF25	GIYK01052864	Ssa#NM_001140529.1	ssa-miR-130a-2-3p	E3 ubiquitin-protein ligase RNF25	ligase activity,protein ubiquitination,ubiquitin protein ligase activity
RNF223	GIYK01032679	Ssa#XM_014135624.1	ssa-miR-15a-3p,ssa-miR-93b-5p,ssa-miR-455-3p	RING finger protein 223-like	integral component of membrane,metal ion binding
RNF213	GIYK01014435	Ssa#XM_014194328.1	ssa-miR-30a-1-2-5p,ssa-miR-17-5p,ssa-miR-106a-5p,ssa-miR-106b-5p,ssa-miR-30a-3-4-5p,ssa-miR-93a-5p,ssa-miR-30e-5p,ssa-miR-20a-5p	E3 ubiquitin-protein ligase rnf213-alpha	ATPase activity,ubiquitin-protein transferase activity
RNF213	GIYK01006460	Ssa#XM_014188287.1	ssa-miR-93a-5p,ssa-miR-17-5p	E3 ubiquitin-protein ligase RNF213 isoform X3	ATPase activity,metal ion binding,ubiquitin-protein transferase activity
RNF19B	GIYK01057908,GIYK01036640	Ssa#XM_014139926.1,Ssa#XM_014141871.1	ssa-miR-15e-5p,ssa-miR-218a-5p,ssa-miR-17-5p,ssa-miR-106a-5p,ssa-miR-106b-5p,ssa-miR-93a-5p,ssa-miR-novel-16-3p,ssa-miR-222a-5p,ssa-miR-15d-5p,ssa-miR-457ab-5p,ssa-miR-novel-16-5p,ssa-miR-8163-5p,ssa-miR-216c-3p,ssa-miR-20a-5p	E3 ubiquitin-protein ligase RNF19B-like	integral component of membrane,protein ubiquitination,metal ion binding,ligase activity,ubiquitin-protein transferase activity
rnf181	GIYK01048714	Ssa#NM_001141208.1	ssa-miR-101b-3p,ssa-miR-551a-3p,ssa-miR-221-3p,ssa-miR-101a-3p	E3 ubiquitin-protein ligase RNF181	ligase activity
RNF170	GIYK01024070,GIYK01024071	Ssa#XM_014216795.1,Ssa#XM_014216795.1	ssa-miR-15e-5p,ssa-miR-17-5p,ssa-miR-106a-5p,ssa-miR-106b-5p,ssa-miR-93a-5p,ssa-miR-146b-5p,ssa-miR-15d-5p,ssa-miR-146d-5p,ssa-miR-214-1-2-3p,ssa-miR-457ab-5p,ssa-miR-146a-5p,ssa-miR-301a-5p,ssa-miR-20a-5p,ssa-miR-214-3-3p	E3 ubiquitin-protein ligase RNF170-like	,integral component of membrane,metal ion binding,ligase activity
RNF167	GIYK01010839,GIYK01010841,GIYK01034060,GIYK01010840,GIYK01034059	Ssa#XM_014137701.1,Ssa#XM_014137701.1,Ssa#XM_014137701.1,Ssa#XM_014137701.1,Ssa#XM_014137701.1	ssa-miR-101b-3p,ssa-miR-15e-5p,ssa-miR-222b-3p,ssa-miR-101a-3p,ssa-miR-15d-5p,ssa-miR-221-3p,ssa-miR-457ab-5p,ssa-miR-8163-5p,ssa-miR-301a-5p,ssa-miR-214-3-3p,ssa-miR-19a-2-3p,ssa-miR-200b-3p	E3 ubiquitin-protein ligase RNF167-like	ligase activity,integral component of membrane,zinc ion binding,
rnf166	GIYK01056827,GIYK01056828	Ssa#XM_014175507.1,Ssa#XM_014175507.1	ssa-miR-101b-3p,ssa-miR-101a-3p,ssa-miR-17-5p,ssa-miR-106a-5p,ssa-miR-106b-5p,ssa-miR-93a-5p,ssa-miR-205b-5p,ssa-miR-222a-5p,ssa-miR-8163-5p,ssa-miR-301a-5p,ssa-miR-216c-3p,ssa-miR-20a-5p,ssa-miR-214-3-3p	RING finger protein 166 isoform X1,E3 ubiquitin-protein ligase RNF166 isoform X2
rnf166	GIYK01056829	Ssa#XM_014175507.1	ssa-miR-101b-3p,ssa-miR-101a-3p,ssa-miR-17-5p,ssa-miR-106a-5p,ssa-miR-106b-5p,ssa-miR-93a-5p,ssa-miR-205b-5p,ssa-miR-222a-5p,ssa-miR-8163-5p,ssa-miR-301a-5p,ssa-miR-216c-3p,ssa-miR-20a-5p,ssa-miR-214-3-3p	RING finger protein 166 isoform X1	ubiquitin-dependent protein catabolic process,ubiquitin protein ligase activity,protein polyubiquitination
rnf166	GIYK01026698	Ssa#XM_014175507.1	ssa-miR-30a-1-2-5p,ssa-miR-101b-3p,ssa-miR-101a-3p,ssa-miR-200b-3p,ssa-miR-17-5p,ssa-miR-106a-5p,ssa-miR-106b-5p,ssa-miR-30a-3-4-5p,ssa-miR-93a-5p,ssa-miR-205b-5p,ssa-miR-222a-5p,ssa-miR-30e-5p,ssa-miR-216c-3p,ssa-miR-301a-5p,ssa-miR-214-3-3p,ssa-miR-20a-5p,ssa-miR-122-2-3p	RING finger protein 166 isoform X1
RNF146	GIYK01038302,GIYK01038301	Ssa#XM_014144659.1,Ssa#XM_014144659.1	ssa-miR-221-3p,ssa-miR-222b-3p,ssa-miR-216c-3p	E3 ubiquitin-protein ligase rnf146-like	protein ubiquitination,ligase activity,poly-ADP-D-ribose binding,Wnt signaling pathway,ubiquitin protein ligase activity,zinc ion binding
RNF13	GIYK01041509,GIYK01041510	Ssa#XM_014216613.1,Ssa#XM_014216613.1	ssa-miR-101b-3p,ssa-miR-15e-5p,ssa-miR-222a-5p,ssa-miR-15d-5p,ssa-miR-122-2-3p	E3 ubiquitin-protein ligase RNF13-like	ligase activity,integral component of membrane,zinc ion binding
RNF115	GIYK01061045	Ssa#XM_014182185.1	ssa-let-7e-5p,ssa-miR-214-3-3p	E3 ubiquitin-protein ligase RNF115-like isoform X1
RNF115	GIYK01013938	Ssa#XM_014182185.1	ssa-let-7e-5p,ssa-miR-214-3-3p	E3 ubiquitin-protein ligase RNF115-like isoform X1
RNF11	GIYK01035617,GIYK01035616	Ssa#XM_014181732.1,Ssa#XM_014212475.1	ssa-miR-17-5p,ssa-miR-106a-5p,ssa-miR-106b-5p,ssa-miR-93a-5p,ssa-miR-novel-16-3p,ssa-miR-222a-5p,ssa-miR-novel-16-5p,ssa-miR-8163-5p,ssa-miR-20a-5p,ssa-miR-19a-2-3p,ssa-miR-200b-3p	RING finger protein 11-like
RND3	GIYK01055843	Ssa#XM_014173485.1	ssa-miR-153a-3p,ssa-miR-17-5p,ssa-miR-106a-5p,ssa-miR-106b-5p,ssa-miR-93a-5p,ssa-miR-222a-5p,ssa-miR-20a-5p	rho-related GTP-binding protein RhoE	cytoplasm,GTP binding,small GTPase mediated signal transduction,GTPase activity
RND3	GIYK01066492	Ssa#NM_001140259.1	ssa-miR-106a-5p,ssa-miR-20a-5p,ssa-miR-93a-5p	Rho-related GTP-binding protein RhoE	GTP binding,small GTPase mediated signal transduction,GTPase activity
RND3	GIYK01050979	Ssa#XM_014165492.1	ssa-miR-153a-3p,ssa-miR-17-5p,ssa-miR-106a-5p,ssa-miR-106b-5p,ssa-miR-93a-5p,ssa-miR-novel-16-3p,ssa-miR-222a-5p,ssa-miR-214-3-3p,ssa-miR-20a-5p,ssa-miR-200b-3p	Rho family GTPase 3	GTP binding,small GTPase mediated signal transduction,GTPase activity
RNASET2	GIYK01002103	Ssa#XM_014213728.1	ssa-miR-214-3-3p	ribonuclease T2-like	RNA binding,ribonuclease T2 activity
RNASET2	GIYK01059913,GIYK01002102,GIYK01059912,GIYK01002101,GIYK01059911	Ssa#XM_014180195.1,Ssa#XM_014213728.1,Ssa#XM_014180195.1,Ssa#XM_014213728.1,Ssa#XM_014180195.1	ssa-miR-93a-5p,ssa-miR-20a-5p,ssa-miR-214-3-3p	ribonuclease T2-like	RNA phosphodiester bond hydrolysis endonucleolytic,rRNA catabolic process,RNA binding,ribonuclease T2 activity
RNASEK	GIYK01034030	Ssa#XM_014137768.1	ssa-miR-146d-5p,ssa-miR-146b-5p,ssa-miR-146a-5p	ribonuclease kappa-B	integral component of membrane,RNA phosphodiester bond hydrolysis endonucleolytic,endoribonuclease activity
RNASEK	GIYK01034031	Ssa#XM_014137768.1	ssa-miR-146d-5p,ssa-miR-146b-5p,ssa-miR-146a-5p	ribonuclease kappa
RN185	GIYK01002822	Ssa#XM_014130626.1	ssa-miR-novel-16-5p	E3 ubiquitin-protein ligase RNF185	ligase activity,integral component of membrane
rn121	GIYK01010836,GIYK01010835	Ssa#NM_001141475.1,Ssa#NM_001141475.1	ssa-miR-221-3p,ssa-miR-222b-3p,ssa-miR-153a-3p,ssa-miR-18bc-5p	RING finger protein 121	integral component of membrane,metal ion binding,protein localization to plasma membrane,neuronal action potential,thigmotaxis,regulation of ER-associated ubiquitin-dependent protein catabolic process
RMI2	GIYK01015568,GIYK01008299	Ssa#XM_014204227.1,Ssa#XM_014204227.1	ssa-miR-8163-5p,ssa-miR-153a-3p,ssa-miR-218a-5p	recQ-mediated genome instability protein 2	DNA binding
RMI1	GIYK01055188,GIYK01055187	Ssa#XM_014172155.1,Ssa#XM_014172155.1	ssa-miR-216c-3p,ssa-miR-novel-16-3p	recQ-mediated genome instability protein 1	nucleotide binding
RMDN2	GIYK01044257,GIYK01044256,GIYK01044259,GIYK01044258	Ssa#XM_014154226.1,Ssa#XM_014154226.1,Ssa#XM_014154226.1,Ssa#XM_014154226.1	ssa-miR-214-3-3p,ssa-miR-218a-5p,ssa-miR-205b-5p,ssa-miR-200b-3p	regulator of microtubule dynamics protein 2-like isoform X1	integral component of membrane,protein binding
RMDN2	GIYK01001294	Ssa#XM_014154226.1	ssa-miR-15e-5p,ssa-miR-1-3p,ssa-miR-205b-5p,ssa-miR-15d-5p,ssa-miR-457ab-5p,ssa-miR-206-3p	regulator of microtubule dynamics protein 2-like isoform X1	integral component of membrane,protein binding
RM27	GIYK01059984	Ssa#XM_014183099.1	ssa-miR-222a-5p	39S ribosomal protein L27, mitochondrial-like	translation,ribosome,structural constituent of ribosome
RLF	GIYK01019510	Ssa#XM_014128598.1	ssa-miR-106b-5p	zinc finger protein Rlf-like isoform X2	nucleic acid binding
RLF	GIYK01064165,GIYK01064164	Ssa#XM_014128598.1,Ssa#XM_014128598.1	ssa-miR-106b-5p	zinc finger protein Rlf-like
RL26	GIYK01021625,GIYK01011939	Ssa#XM_014213079.1,Ssa#XM_014213079.1	ssa-miR-15d-5p,ssa-miR-15e-5p,ssa-miR-301a-5p,ssa-miR-214-3-3p	60S ribosomal protein L26	RNA binding,ribosomal large subunit biogenesis,structural constituent of ribosome,embryonic retina morphogenesis in camera-type eye,cytosolic large ribosomal subunit,optokinetic behavior,cytoplasmic translation
RL14	GIYK01037417	Ssa#XM_014143118.1	ssa-miR-novel-16-5p	60S ribosomal protein L14	translation,ribosome,structural constituent of ribosome,RNA binding
RL13	GIYK01026827	Ssa#NM_001141291.1	ssa-miR-221-3p,ssa-miR-222b-3p	60S ribosomal protein L13	translation,ribosome,regulation of cell cycle,structural constituent of ribosome
RL10	GIYK01031676,GIYK01064383,GIYK01031677	Ssa#XM_014184063.1,Ssa#XM_014184063.1,Ssa#XM_014184063.1	ssa-miR-8163-5p,ssa-miR-218a-5p	60S ribosomal protein L10	translation,ribosome,structural constituent of ribosome
RIPK4	GIYK01010981,GIYK01033921	Ssa#XM_014137875.1,Ssa#XM_014137875.1	ssa-let-7b-3p,ssa-miR-142b-5p,ssa-let-7j-3p	receptor-interacting serine/threonine-protein kinase 4-like	ATP binding,protein binding,protein kinase activity,protein phosphorylation
RIPK4	GIYK01010982	Ssa#XM_014137875.1	ssa-let-7b-3p,ssa-let-7j-3p		protein binding
RIPK3	GIYK01063730,GIYK01063731	Ssa#XM_014148535.1,Ssa#XM_014148535.1	ssa-miR-216c-3p,ssa-miR-214-1-2-3p	receptor-interacting serine/threonine-protein kinase 3-like isoform X1	regulation of apoptotic process,protein serine/threonine kinase activity,inflammatory response,ATP binding,protein phosphorylation,innate immune response
RIPK3	GIYK01063732	Ssa#XM_014148535.1	ssa-miR-216c-3p,ssa-miR-214-1-2-3p	receptor-interacting serine/threonine-protein kinase 3-like isoform X1
RIOX1	GIYK01017062,GIYK01017061	Ssa#XM_014205995.1,Ssa#XM_014205995.1	ssa-miR-17-5p,ssa-miR-106a-5p,ssa-miR-106b-5p,ssa-miR-93a-5p,ssa-miR-205b-5p,ssa-miR-214-1-2-3p,ssa-miR-20a-5p,ssa-miR-214-3-3p	ribosomal oxygenase 1-like	iron ion binding,oxidation-reduction process,2-oxoglutarate-dependent dioxygenase activity,methylation,methyltransferase activity,nucleus
riok3	GIYK01047371	Ssa#NM_001140510.1	ssa-miR-222a-5p	serine/threonine-protein kinase RIO3	ATP binding,protein phosphorylation,metal ion binding,protein serine/threonine kinase activity
riok3	GIYK01047372	Ssa#NM_001140510.1	ssa-miR-222a-5p
riok3	GIYK01047373	Ssa#NM_001140510.1	ssa-miR-218a-5p,ssa-miR-222a-5p	unnamed protein product	ATP binding,protein phosphorylation,protein serine/threonine kinase activity,integral component of membrane
RINT1	GIYK01066411	Ssa#XM_014186094.1	ssa-miR-15a-3p	RAD50-interacting protein 1	endoplasmic reticulum,Golgi vesicle transport
RIN2	GIYK01005972,GIYK01029137,GIYK01005971,GIYK01005969,GIYK01005970,GIYK01029136	Ssa#XM_014174293.1,Ssa#XM_014130965.1,Ssa#XM_014174293.1,Ssa#XM_014174293.1,Ssa#XM_014174293.1,Ssa#XM_014130965.1	ssa-miR-15e-5p,ssa-miR-146b-5p,ssa-miR-novel-13-5p,ssa-miR-15d-5p,ssa-miR-221-3p,ssa-miR-146d-5p,ssa-miR-457ab-5p,ssa-miR-146a-5p	ras and Rab interactor 2-like,ras and Rab interactor 2-like isoform X1,ras and Rab interactor 2-like isoform X2	,signal transduction
RIN2	GIYK01005973,GIYK01005974	Ssa#XM_014174293.1,Ssa#XM_014174293.1	ssa-miR-novel-13-5p	ras and Rab interactor 2-like	,signal transduction
RHOU	GIYK01059690,GIYK01059686	Ssa#XM_014179896.1,Ssa#XM_014179896.1	ssa-miR-101b-3p,ssa-miR-101a-3p,ssa-miR-203b-3p,ssa-miR-8163-5p,ssa-miR-216c-3p	rho-related GTP-binding protein RhoU-like	small GTPase mediated signal transduction,GTP binding,atrioventricular canal development,GTPase activity,regulation of cell adhesion
RHOU	GIYK01059688,GIYK01059689,GIYK01059687	Ssa#XM_014179896.1,Ssa#XM_014179896.1,Ssa#XM_014179896.1	ssa-miR-101b-3p,ssa-miR-101a-3p,ssa-miR-203b-3p,ssa-miR-214-1-2-3p,ssa-miR-8163-5p,ssa-miR-214-3-3p,ssa-miR-216c-3p,ssa-miR-200b-3p	rho-related GTP-binding protein RhoU-like	GTP binding,small GTPase mediated signal transduction,GTPase activity
rhot2	GIYK01046927,GIYK01046925,GIYK01046926	Ssa#XM_014158910.1,Ssa#XM_014158910.1,Ssa#XM_014158910.1	ssa-miR-218a-5p,ssa-miR-214-1-2-3p	mitochondrial Rho GTPase 2	GTP binding,mitochondrion organization,calcium ion binding,integral component of mitochondrial outer membrane,GTPase activity
rhoq	GIYK01001337	Ssa#NM_001165283.1	ssa-miR-218a-5p,ssa-miR-462b-5p,ssa-miR-214-1-2-3p,ssa-miR-8163-5p,ssa-miR-214-3-3p	rho-related GTP-binding protein RhoQ	GTP binding,small GTPase mediated signal transduction,GTPase activity
RHOG	GIYK01011876	Ssa#NM_001146560.1	ssa-miR-222b-3p,ssa-miR-146b-5p,ssa-miR-221-3p,ssa-miR-146d-5p,ssa-miR-146a-5p,ssa-miR-301a-5p	rho-related GTP-binding protein RhoG-like	GTP binding,small GTPase mediated signal transduction,GTPase activity
RHOG	GIYK01034069,GIYK01034068	Ssa#XM_014137673.1,Ssa#XM_014137673.1	ssa-miR-101b-3p,ssa-miR-101a-3p,ssa-miR-18bc-5p,ssa-miR-214-1-2-3p,ssa-miR-206-3p	rho-related GTP-binding protein RhoG-like	GTP binding,small GTPase mediated signal transduction,GTPase activity
rhof	GIYK01002836,GIYK01002835,GIYK01002834	Ssa#XM_014130687.1,Ssa#XM_014130687.1,Ssa#XM_014130687.1	ssa-miR-15d-5p,ssa-miR-15e-5p,ssa-miR-551a-3p	rho-related GTP-binding protein RhoF isoform X2	GTP binding,small GTPase mediated signal transduction,GTPase activity
RHOF	GIYK01002832,GIYK01002833	Ssa#XM_014130687.1,Ssa#XM_014130687.1	ssa-miR-15d-5p,ssa-miR-15e-5p,ssa-miR-551a-3p	Rho-related GTP-binding protein RhoF	GTP binding,small GTPase mediated signal transduction,GTPase activity
RHOB	GIYK01015971	Ssa#XM_014204620.1	ssa-miR-221-3p,ssa-miR-222b-3p	rho-related GTP-binding protein RhoB	cell migration,small GTPase mediated signal transduction,GTP binding,cytoplasm,GTPase activity
RHOB	GIYK01019758,GIYK01019757,GIYK01019759	Ssa#NM_001139964.1,Ssa#NM_001139964.1,Ssa#NM_001139964.1	ssa-miR-216c-3p,ssa-miR-19a-2-3p,ssa-miR-200b-3p	low density lipoprotein receptor adapter protein 1-B-like isoform X9,low density lipoprotein receptor adapter protein 1-B-like isoform X1	protein binding
RHNO1	GIYK01018512	Ssa#NM_001141253.1	ssa-miR-15d-5p,ssa-miR-15e-5p	RAD9, HUS1, RAD1-interacting nuclear orphan protein 1	DNA damage checkpoint,nucleus,cellular response to ionizing radiation
RHBDF2	GIYK01005625,GIYK01005628,GIYK01005626	Ssa#XM_014177105.1,Ssa#XM_014177105.1,Ssa#XM_014177105.1	ssa-miR-101b-3p,ssa-miR-20a-5p,ssa-miR-101a-3p,ssa-miR-93a-5p	inactive rhomboid protein 2-like isoform X1	proteolysis,serine-type endopeptidase activity,integral component of membrane
RHBDF2	GIYK01005627	Ssa#XM_014177105.1	ssa-miR-101b-3p,ssa-miR-20a-5p,ssa-miR-101a-3p,ssa-miR-93a-5p	inactive rhomboid protein 2-like isoform X1	integral component of membrane,serine-type endopeptidase activity
RHBDF1	GIYK01008360	Ssa#XM_014192992.1	ssa-miR-novel-16-3p,ssa-miR-novel-13-5p	inactive rhomboid protein 1 isoform X1	proteolysis,serine-type endopeptidase activity,integral component of membrane
RHBDD3	GIYK01048380,GIYK01048381	Ssa#XM_014161215.1,Ssa#XM_014161215.1	ssa-miR-101a-3p,ssa-miR-214-3-3p	hypothetical protein FQN60_017687	proteolysis,serine-type endopeptidase activity,integral component of membrane
RHBDD3	GIYK01048379	Ssa#XM_014161215.1	ssa-miR-101a-3p,ssa-miR-214-3-3p	rhomboid domain-containing protein 3	proteolysis,protein binding,serine-type endopeptidase activity,integral component of membrane
rhbdd1	GIYK01047596,GIYK01047595,GIYK01047597,GIYK01047598,GIYK01047591	Ssa#NM_001140309.1,Ssa#NM_001140309.1,Ssa#NM_001140309.1,Ssa#NM_001140309.1,Ssa#NM_001140309.1	ssa-miR-30a-1-2-5p,ssa-miR-30a-3-4-5p,ssa-miR-novel-1-3p,ssa-miR-30e-5p,ssa-miR-novel-16-5p,ssa-miR-301a-5p,ssa-miR-216c-3p,ssa-miR-19a-2-3p,ssa-miR-200b-3p	rhomboid-related protein 4 isoform X1,rhomboid-related protein 4	proteolysis,serine-type endopeptidase activity,integral component of membrane
rhbdd1	GIYK01047594,GIYK01047592,GIYK01047593	Ssa#NM_001140309.1,Ssa#NM_001140309.1,Ssa#NM_001140309.1	ssa-miR-30a-1-2-5p,ssa-miR-30a-3-4-5p,ssa-miR-novel-1-3p,ssa-miR-30e-5p,ssa-miR-novel-16-5p,ssa-miR-301a-5p,ssa-miR-216c-3p,ssa-miR-19a-2-3p,ssa-miR-200b-3p	rhomboid-related protein 4	proteolysis,serine-type endopeptidase activity,integral component of membrane
rhbdd1	GIYK01047599	Ssa#NM_001140309.1	ssa-miR-novel-1-3p,ssa-miR-216c-3p,ssa-miR-novel-16-5p	rhomboid-related protein 4 isoform X2	integral component of membrane,serine-type endopeptidase activity
rhag	GIYK01000426,GIYK01000425,GIYK01000419,GIYK01000423,GIYK01000422,GIYK01000427,GIYK01000429,GIYK01000424,GIYK01000417,GIYK01000421	Ssa#NM_001123572.1,Ssa#NM_001123572.1,Ssa#NM_001123572.1,Ssa#NM_001123572.1,Ssa#NM_001123572.1,Ssa#NM_001123572.1,Ssa#NM_001123572.1,Ssa#NM_001123572.1,Ssa#NM_001123572.1,Ssa#NM_001123572.1	ssa-miR-101b-3p,ssa-miR-15e-5p,ssa-miR-101a-3p,ssa-miR-15d-5p,ssa-miR-457ab-5p,ssa-miR-novel-16-5p,ssa-miR-206-3p,ssa-miR-19a-2-3p	Rh blood group, D antigen	membrane,integral component of plasma membrane,ammonium transmembrane transporter activity,ammonium transmembrane transport,ammonium transport
RGS3	GIYK01027965	Ssa#XM_014128717.1	ssa-miR-30a-1-2-5p,ssa-miR-101b-3p,ssa-miR-218a-5p,ssa-miR-101a-3p,ssa-miR-30a-3-4-5p,ssa-miR-222a-5p,ssa-miR-30e-5p	regulator of G-protein signaling 3-like isoform X6
RGN	GIYK01062611,GIYK01043178	Ssa#NM_001141394.1,Ssa#NM_001141394.1	ssa-let-7b-3p,ssa-let-7j-3p	regucalcin	calcium ion binding,gluconolactonase activity,regulation of catalytic activity,enzyme regulator activity
RFXAP	GIYK01011749	Ssa#XM_014198370.1	ssa-miR-200b-3p	regulatory factor X-associated protein
RFNG	GIYK01001878	Ssa#XM_014202048.1	ssa-miR-8163-5p,ssa-miR-101b-3p,ssa-miR-101a-3p,ssa-miR-200b-3p	beta-1,3-N-acetylglucosaminyltransferase radical fringe	metal ion binding,O-fucosylpeptide 3-beta-N-acetylglucosaminyltransferase activity,integral component of Golgi membrane,pattern specification process
rfng	GIYK01001879	Ssa#XM_014202048.1	ssa-miR-8163-5p,ssa-miR-101b-3p,ssa-miR-101a-3p,ssa-miR-200b-3p	beta-1,3-N-acetylglucosaminyltransferase radical fringe	metal ion binding,O-fucosylpeptide 3-beta-N-acetylglucosaminyltransferase activity,integral component of Golgi membrane,pattern specification process
RFLNB	GIYK01049470	Ssa#XM_014162715.1	ssa-miR-15e-5p,ssa-miR-200b-3p,ssa-miR-15d-5p,ssa-miR-457ab-5p,ssa-miR-214-3-3p	refilin-B isoform X1	regulation of chondrocyte development,actin filament bundle organization,filamin binding
RFC4	GIYK01023997,GIYK01023999	Ssa#NM_001140769.1,Ssa#NM_001140769.1	ssa-miR-15e-3p	replication factor C subunit 4-like isoform X1	ATP binding,DNA binding,DNA replication,retina development in camera-type eye
RFC4	GIYK01023998	Ssa#NM_001140769.1	ssa-miR-15e-3p	replication factor C subunit 4-like isoform X1	ATP binding,DNA binding,DNA replication
RFA3	GIYK01058399	Ssa#XM_014177920.1	ssa-miR-214-3-3p	replication protein A 14 kDa subunit	DNA recombination,DNA replication,DNA repair,DNA binding,nucleus
rfa1	GIYK01049575	Ssa#NM_001141785.1	ssa-miR-101b-3p,ssa-miR-216c-3p,ssa-miR-101a-3p	replication protein A 70 kDa DNA-binding subunit-like isoform X1	DNA recombination,metal ion binding,DNA replication,DNA repair,DNA binding,nucleus
REXO5	GIYK01065511	Ssa#XM_014186063.1	ssa-let-7b-3p,ssa-miR-8163-3p,ssa-let-7j-3p	putative RNA exonuclease NEF-sp isoform X2	RNA binding,nucleic acid phosphodiester bond hydrolysis,exonuclease activity
rexo4	GIYK01003403,GIYK01003402	Ssa#XM_014139312.1,Ssa#XM_014139312.1	ssa-miR-106a-5p,ssa-miR-20a-5p,ssa-miR-17-5p	RNA exonuclease 4-like	nucleic acid binding,3'-5' exonuclease activity,rRNA processing,nucleic acid phosphodiester bond hydrolysis
REXO1	GIYK01055008,GIYK01055001,GIYK01055010,GIYK01054997,GIYK01055006,GIYK01055002,GIYK01055000,GIYK01055079,GIYK01055005	Ssa#XM_014171510.1,Ssa#XM_014171510.1,Ssa#XM_014171510.1,Ssa#XM_014171510.1,Ssa#XM_014171510.1,Ssa#XM_014171510.1,Ssa#XM_014171510.1,Ssa#XM_014171510.1,Ssa#XM_014171510.1	ssa-miR-222a-5p,ssa-let-7e-5p,ssa-miR-218a-5p,ssa-miR-214-3-3p	RNA exonuclease 1 homolog isoform X2,RNA exonuclease 1 homolog isoform X1	nucleic acid binding,exonuclease activity,nucleic acid phosphodiester bond hydrolysis,metal ion binding
RETSAT	GIYK01008094,GIYK01008093,GIYK01008095	Ssa#XM_014152903.1,Ssa#XM_014152903.1,Ssa#XM_014152903.1	ssa-miR-222b-3p,ssa-miR-221-3p,ssa-let-7e-5p,ssa-miR-214-1-2-3p,ssa-miR-novel-16-5p,ssa-miR-8163-5p	putative all-trans-retinol 13,14-reductase
RELL1	GIYK01062677	Ssa#XM_014206476.1	ssa-miR-301a-5p,ssa-miR-novel-13-5p,ssa-miR-205b-5p,ssa-miR-200b-3p	RELT-like protein 1	integral component of membrane,positive regulation of p38MAPK cascade
REEP6	GIYK01042802	Ssa#XM_014151927.1	ssa-miR-205b-5p	receptor expression-enhancing protein 6-like	integral component of membrane
REEP6	GIYK01042803	Ssa#XM_014151927.1	ssa-miR-205b-5p,ssa-miR-200b-3p	receptor expression-enhancing protein 6-like
RECQL5	GIYK01015038,GIYK01015037	Ssa#XM_014203494.1,Ssa#XM_014203494.1	ssa-miR-30a-1-2-5p,ssa-miR-15e-5p,ssa-miR-101a-3p,ssa-miR-222a-5p,ssa-miR-15d-5p,ssa-miR-30e-5p,ssa-miR-457ab-5p,ssa-miR-214-1-2-3p	ATP-dependent DNA helicase Q5-like isoform X2
RDH14	GIYK01053971	Ssa#XM_014170562.1	ssa-miR-218a-5p,ssa-miR-200b-3p	retinol dehydrogenase 14-like
RDH14	GIYK01033098	Ssa#XM_014136200.1	ssa-miR-15d-5p,ssa-miR-15e-5p,ssa-miR-457ab-5p	PAN2-PAN3 deadenylation complex catalytic subunit PAN2 isoform X1	poly(A)-specific ribonuclease activity,metal ion binding,RNA phosphodiester bond hydrolysis exonucleolytic,nucleic acid binding,positive regulation of cytoplasmic mRNA processing body assembly,nuclear-transcribed mRNA poly(A) tail shortening,protein binding,mRNA processing,P-body,PAN complex,nucleus
RDH12	GIYK01000019,GIYK01000020,GIYK01000021	Ssa#XM_014211743.1,Ssa#XM_014211743.1,Ssa#XM_014211743.1	ssa-miR-30a-1-2-5p,ssa-miR-101b-3p,ssa-miR-101a-3p,ssa-miR-30a-3-4-5p,ssa-miR-205b-5p,ssa-miR-30e-5p	Retinol dehydrogenase 12,retinol dehydrogenase 12 isoform X2
RD3L	GIYK01037832	Ssa#XM_014143980.1	ssa-miR-15d-5p,ssa-miR-15e-5p,ssa-miR-457ab-5p,ssa-miR-200b-3p	protein RD3-like
rcor1	GIYK01000890,GIYK01020237,GIYK01020236	Ssa#XM_014192793.1,Ssa#XM_014192793.1,Ssa#XM_014192793.1	ssa-miR-17-5p,ssa-miR-106a-5p,ssa-miR-106b-5p,ssa-miR-93a-5p,ssa-miR-205b-5p,ssa-miR-551a-3p,ssa-miR-203b-3p,ssa-miR-301a-5p,ssa-miR-20a-5p,ssa-miR-200b-3p	REST corepressor 1-like isoform X2,REST corepressor 1-like,REST corepressor 1 isoform X1	DNA binding,nucleus,regulation of retinoic acid biosynthetic process,hemopoiesis
RCL1	GIYK01002420	Ssa#GRASP209734617	ssa-miR-8163-3p,ssa-miR-455-3p	RNA 3'-terminal phosphate cyclase-like protein	catalytic activity,ribosome biogenesis,RNA processing,nucleolus
rcc1	GIYK01005323,GIYK01005322	Ssa#NM_001173713.1,Ssa#NM_001173713.1	ssa-miR-novel-1-3p	regulator of chromosome condensation
rcan2	GIYK01038229	Ssa#NM_001165314.1	ssa-miR-18bc-5p	calcipressin-2-like isoform X1	calcium-dependent protein serine/threonine phosphatase regulator activity,nucleic acid binding,regulation of phosphoprotein phosphatase activity,cytoplasm,regulation of calcineurin-NFAT signaling cascade
rbp2	GIYK01035143	Ssa#XM_014139952.1	ssa-miR-214-1-2-3p,ssa-miR-214-3-3p		lipid binding
rbp2	GIYK01050737,GIYK01050738,GIYK01050739,GIYK01050740	Ssa#XM_014164955.1,Ssa#XM_014164955.1,Ssa#XM_014164955.1,Ssa#XM_014164955.1	ssa-miR-214-1-2-3p,ssa-miR-214-3-3p	E3 SUMO-protein ligase RanBP2-like isoform X1,E3 SUMO-protein ligase RanBP2-like isoform X2	metal ion binding,ligase activity,protein binding,protein peptidyl-prolyl isomerization,peptidyl-prolyl cis-trans isomerase activity,intracellular transport
rbp2	GIYK01063903	Ssa#XM_014191281.1	ssa-miR-214-1-2-3p,ssa-miR-214-3-3p	E3 SUMO-protein ligase RanBP2-like isoform X1	ligase activity,protein peptidyl-prolyl isomerization,peptidyl-prolyl cis-trans isomerase activity,intracellular transport,zinc ion binding
RBMS2	GIYK01032863	Ssa#XM_014135906.1	ssa-miR-101b-3p,ssa-miR-15e-5p,ssa-miR-153a-3p,ssa-miR-101a-3p,ssa-miR-15d-5p,ssa-miR-203b-3p,ssa-miR-457ab-5p,ssa-miR-206-3p,ssa-miR-8163-5p	RNA-binding motif, single-stranded-interacting protein 2-like isoform X1	RNA binding
rbms1	GIYK01050205,GIYK01050202,GIYK01050204,GIYK01050203,GIYK01050201	Ssa#XM_014163966.1,Ssa#XM_014163966.1,Ssa#XM_014163966.1,Ssa#XM_014163966.1,Ssa#XM_014163966.1	ssa-miR-205b-5p,ssa-miR-novel-16-3p,ssa-miR-222a-5p,ssa-miR-15d-5p,ssa-let-7e-5p,ssa-miR-457ab-5p,ssa-miR-214-1-2-3p,ssa-miR-551a-3p,ssa-miR-214-3-3p,ssa-miR-216c-3p,ssa-miR-200b-3p	RNA-binding motif, single-stranded-interacting protein 1-like isoform X5,RNA-binding motif, single-stranded-interacting protein 1-like isoform X2	ribonucleoprotein complex,RNA binding
RBM8A	GIYK01013341	Ssa#XM_014200681.1	ssa-miR-novel-2-5p	RNA-binding protein 8A isoform X1	nuclear-transcribed mRNA catabolic process nonsense-mediated decay,regulation of translation,cytoplasm,nuclear speck,regulation of alternative mRNA splicing via spliceosome,mRNA binding,mRNA transport,U2-type catalytic step 1 spliceosome
RBM5	GIYK01051298	Ssa#XM_014166138.1	ssa-miR-8163-5p,ssa-miR-222a-5p,ssa-miR-214-1-2-3p,ssa-miR-214-3-3p	RNA-binding protein 5-like isoform X3	nucleic acid binding,spliceosomal complex,regulation of apoptotic process,regulation of alternative mRNA splicing via spliceosome
RBM5	GIYK01031409,GIYK01031412,GIYK01031405,GIYK01031408,GIYK01031392,GIYK01031406,GIYK01031398,GIYK01031394,GIYK01031397,GIYK01031407,GIYK01031395,GIYK01031393,GIYK01031401,GIYK01031396,GIYK01031404,GIYK01031403,GIYK01031402,GIYK01031410,GIYK01031400,GIYK01031399,GIYK01031411	Ssa#XM_014133868.1,Ssa#XM_014133868.1,Ssa#XM_014133868.1,Ssa#XM_014133868.1,Ssa#XM_014133868.1,Ssa#XM_014133868.1,Ssa#XM_014133868.1,Ssa#XM_014133868.1,Ssa#XM_014133868.1,Ssa#XM_014133868.1,Ssa#XM_014133868.1,Ssa#XM_014133868.1,Ssa#XM_014133868.1,Ssa#XM_014133868.1,Ssa#XM_014133868.1,Ssa#XM_014133868.1,Ssa#XM_014133868.1,Ssa#XM_014133868.1,Ssa#XM_014133868.1,Ssa#XM_014133868.1,Ssa#XM_014133868.1	ssa-miR-30a-1-2-5p,ssa-miR-30a-3-4-5p,ssa-miR-30e-5p	RNA-binding protein 5-B-like isoform X1	regulation of apoptotic process,metal ion binding,nucleic acid binding,regulation of alternative mRNA splicing via spliceosome,RNA binding,spliceosomal complex
RBM5	GIYK01030519,GIYK01030517,GIYK01030518	Ssa#XM_014132838.1,Ssa#XM_014132838.1,Ssa#XM_014132838.1	ssa-miR-216c-3p	RNA-binding protein 5-like isoform X1	regulation of apoptotic process,metal ion binding,regulation of alternative mRNA splicing via spliceosome,RNA binding,spliceosomal complex
rbm41	GIYK01024856	Ssa#XM_014123924.1	ssa-miR-203b-3p	RNA-binding protein 41	RNA binding
rbm4	GIYK01010555	Ssa#NM_001173948.1	ssa-miR-novel-16-5p	RNA-binding protein lark-like	RNA binding
rbm39	GIYK01051166	Ssa#XM_014137020.1	ssa-miR-214-1-2-3p	RNA-binding protein 39-like isoform X3	nucleus,RNA binding,mRNA processing
RBM38	GIYK01031138	Ssa#XM_014124848.1	ssa-miR-15e-5p,ssa-miR-15d-5p,ssa-miR-457ab-5p,ssa-miR-301a-5p,ssa-miR-216c-3p,ssa-miR-200b-3p	RNA-binding protein 38-like	nucleic acid binding
RBM25	GIYK01017075	Ssa#XM_014206048.1	ssa-miR-218a-5p,ssa-miR-novel-12-5p	RNA-binding protein 25-like	mRNA processing
RBM19	GIYK01048439,GIYK01048440	Ssa#NM_001140504.1,Ssa#NM_001140504.1	ssa-let-7j-3p	probable RNA-binding protein 19	RNA binding
RBM12B	GIYK01061222,GIYK01066277,GIYK01061305,GIYK01061223,GIYK01066278,GIYK01066288,GIYK01061556,GIYK01066279,GIYK01066287	Ssa#XM_014188012.1,Ssa#XM_014188012.1,Ssa#XM_014188012.1,Ssa#XM_014188012.1,Ssa#XM_014188012.1,Ssa#XM_014188012.1,Ssa#XM_014188012.1,Ssa#XM_014188012.1,Ssa#XM_014188012.1	ssa-miR-221-3p,ssa-miR-222b-3p	RNA-binding protein 12B-like isoform X1	integral component of membrane,RNA binding
RBM12B	GIYK01061224	Ssa#XM_014188012.1	ssa-miR-221-3p,ssa-miR-222b-3p	RNA-binding protein 12B-like isoform X1	integral component of membrane,RNA binding
RBM12B	GIYK01066289	Ssa#XM_014188012.1	ssa-miR-221-3p,ssa-miR-222b-3p	RNA-binding protein 12B-A-like	RNA binding
rbm12	GIYK01051177,GIYK01051176,GIYK01029754,GIYK01051178,GIYK01051180,GIYK01051175	Ssa#XM_014131608.1,Ssa#XM_014131608.1,Ssa#XM_014131608.1,Ssa#XM_014131608.1,Ssa#XM_014131608.1,Ssa#XM_014131608.1	ssa-miR-15e-5p,ssa-miR-1-3p,ssa-miR-222b-3p,ssa-miR-15d-5p,ssa-miR-221-3p,ssa-miR-203b-3p,ssa-miR-457ab-5p,ssa-miR-206-3p	RNA-binding protein 12	RNA binding
RBM12	GIYK01029752,GIYK01029753,GIYK01063374,GIYK01063375	Ssa#XM_014131608.1,Ssa#XM_014131608.1,Ssa#XM_014131608.1,Ssa#XM_014131608.1	ssa-miR-221-3p,ssa-miR-222b-3p,ssa-miR-206-3p	RNA-binding protein 12	RNA binding
RBCK1	GIYK01007186,GIYK01007187	Ssa#XM_014191047.1,Ssa#XM_014191047.1	ssa-miR-8163-5p,ssa-miR-novel-16-3p,ssa-miR-222a-5p	ranBP-type and C3HC4-type zinc finger-containing protein 1-like isoform X1	eye morphogenesis,metal ion binding,embryonic cranial skeleton morphogenesis,otic vesicle morphogenesis
RBBP4	GIYK01019773	Ssa#NM_001140070.1	ssa-miR-novel-2-5p	Histone-binding protein RBBP4	chromatin remodeling,cell cycle,DNA-dependent ATPase activity,protein binding,fin regeneration,ESC/E(Z) complex,DNA replication,CAF-1 complex,chromatin assembly
RASSF8	GIYK01025624	Ssa#XM_014125148.1	ssa-miR-30a-1-2-5p,ssa-miR-30e-5p	ras association domain-containing protein 8-like	regulation of microtubule cytoskeleton organization,signal transduction
RASGEF1B	GIYK01034691	Ssa#XM_014138700.1	ssa-miR-551a-3p,ssa-miR-200b-3p	ras-GEF domain-containing family member 1B-B-like	small GTPase mediated signal transduction,guanyl-nucleotide exchange factor activity
RARRES2	GIYK01060350	Ssa#XM_014180873.1	ssa-miR-novel-16-3p	Chemerin, Retinoic acid receptor responder protein 2
RARRES2	GIYK01060352	Ssa#XM_014180873.1	ssa-miR-novel-16-3p,ssa-miR-222a-5p	Chemerin, Retinoic acid receptor responder protein 2	regulation of lipid catabolic process,signaling receptor binding,inflammatory response
RAPGEF6	GIYK01011516	Ssa#XM_014197994.1	ssa-miR-101b-3p,ssa-miR-214-1-2-3p,ssa-miR-101a-3p,ssa-miR-214-3-3p	rap guanine nucleotide exchange factor 6-like isoform X2	small GTPase mediated signal transduction,guanyl-nucleotide exchange factor activity
RAPGEF5	GIYK01058518,GIYK01058514,GIYK01058516,GIYK01058517,GIYK01058513,GIYK01058515	Ssa#XM_014214075.1,Ssa#XM_014214075.1,Ssa#XM_014214075.1,Ssa#XM_014178230.1,Ssa#XM_014214075.1,Ssa#XM_014214075.1	ssa-miR-17-5p,ssa-miR-106a-5p,ssa-miR-106b-5p,ssa-miR-93a-5p,ssa-miR-206-3p,ssa-miR-216c-3p,ssa-miR-20a-5p	rap guanine nucleotide exchange factor 5-like,rap guanine nucleotide exchange factor 5-like isoform X1	small GTPase mediated signal transduction,guanyl-nucleotide exchange factor activity
RAPGEF3	GIYK01033046,GIYK01033049,GIYK01033044,GIYK01033045,GIYK01033048,GIYK01033051,GIYK01033050,GIYK01033041,GIYK01033053,GIYK01033047,GIYK01033043,GIYK01033042,GIYK01033052	Ssa#XM_014136150.1,Ssa#XM_014136150.1,Ssa#XM_014136150.1,Ssa#XM_014136150.1,Ssa#XM_014136150.1,Ssa#XM_014136150.1,Ssa#XM_014136150.1,Ssa#XM_014136150.1,Ssa#XM_014136150.1,Ssa#XM_014136150.1,Ssa#XM_014136150.1,Ssa#XM_014136150.1,Ssa#XM_014136150.1	ssa-miR-15e-5p,ssa-miR-200b-3p,ssa-miR-15d-5p,ssa-miR-457ab-5p,ssa-miR-novel-16-3p,ssa-miR-19a-2-3p,ssa-miR-214-3-3p	rap guanine nucleotide exchange factor 3-like isoform X1,rap guanine nucleotide exchange factor 3-like isoform X6,rap guanine nucleotide exchange factor 3-like isoform X3	small GTPase mediated signal transduction,guanyl-nucleotide exchange factor activity
rap2c	GIYK01061490	Ssa#NM_001173959.1	ssa-miR-novel-13-5p,ssa-miR-205b-5p,ssa-miR-200b-3p	ras-related protein Rap-2c	GTP binding,GDP binding,Rap protein signal transduction,GTPase activity,negative regulation of cell migration,plasma membrane
RAP2B	GIYK01049907,GIYK01049910,GIYK01049908,GIYK01049909	Ssa#XM_014215390.1,Ssa#XM_014215390.1,Ssa#XM_014215390.1,Ssa#XM_014215390.1	ssa-miR-203b-3p,ssa-miR-101a-3p,ssa-miR-200b-3p	ras-related protein Rap-2b	GTP binding,GDP binding,Rap protein signal transduction,GTPase activity,negative regulation of cell migration,plasma membrane
RAP2B	GIYK01023041,GIYK01023042	Ssa#XM_014215390.1,Ssa#XM_014215390.1	ssa-miR-101b-3p,ssa-miR-101a-3p	ras-related protein Rap-2b	GTP binding,GDP binding,Rap protein signal transduction,GTPase activity,negative regulation of cell migration,plasma membrane
RAP2A	GIYK01015068,GIYK01008833	Ssa#XM_014203529.1,Ssa#XM_014203529.1	ssa-miR-15e-5p,ssa-miR-15d-5p,ssa-miR-457ab-5p,ssa-miR-19a-2-3p,ssa-miR-200b-3p	ras-related protein Rap-2a-like	GTP binding,signal transduction,membrane,GTPase activity
RAP1GAP2	GIYK01022183	Ssa#XM_014162214.1	ssa-miR-221-3p,ssa-miR-218a-5p,ssa-miR-novel-16-3p	rap1 GTPase-activating protein 2-like isoform X7
RAP1GAP2	GIYK01049071,GIYK01049083,GIYK01049077,GIYK01049073,GIYK01049084,GIYK01049075,GIYK01049079,GIYK01049074	Ssa#XM_014162214.1,Ssa#XM_014162214.1,Ssa#XM_014162214.1,Ssa#XM_014162214.1,Ssa#XM_014162214.1,Ssa#XM_014162214.1,Ssa#XM_014162214.1,Ssa#XM_014162214.1	ssa-miR-218a-5p,ssa-miR-222a-5p	rap1 GTPase-activating protein 2-like isoform X6,rap1 GTPase-activating protein 2-like isoform X2,rap1 GTPase-activating protein 2-like isoform X10,rap1 GTPase-activating protein 2-like isoform X3	,GTPase activator activity,regulation of small GTPase mediated signal transduction,positive regulation of GTPase activity
RAP1GAP	GIYK01033176,GIYK01033177,GIYK01033178,GIYK01033179	Ssa#XM_014136314.1,Ssa#XM_014136314.1,Ssa#XM_014136314.1,Ssa#XM_014136314.1	ssa-miR-30a-1-2-5p,ssa-miR-218a-5p,ssa-miR-17-5p,ssa-miR-106a-5p,ssa-miR-30a-3-4-5p,ssa-miR-93a-5p,ssa-miR-222a-5p,ssa-miR-30e-5p,ssa-miR-214-1-2-3p,ssa-miR-8163-5p,ssa-miR-20a-5p,ssa-miR-19a-2-3p	rap1 GTPase-activating protein 1-like isoform X10,rap1 GTPase-activating protein 1-like isoform X5,rap1 GTPase-activating protein 1-like isoform X2	GTPase activator activity,regulation of small GTPase mediated signal transduction,positive regulation of GTPase activity
RANGAP1	GIYK01001754,GIYK01001753	Ssa#XM_014208041.1,Ssa#XM_014208041.1	ssa-miR-301a-5p,ssa-miR-214-1-2-3p,ssa-miR-206-3p	ran GTPase-activating protein 1-like	GTPase activator activity,signal transduction,positive regulation of GTPase activity,protein binding
RANGAP1	GIYK01001755,GIYK01001756,GIYK01001757	Ssa#XM_014208041.1,Ssa#XM_014208041.1,Ssa#XM_014208041.1	ssa-miR-301a-5p,ssa-miR-214-1-2-3p,ssa-miR-206-3p	ran GTPase-activating protein 1-like	GTPase activator activity,signal transduction,positive regulation of GTPase activity,protein binding
ranbp9	GIYK01034843,GIYK01034842,GIYK01034845	Ssa#NM_001173718.1,Ssa#NM_001173718.1,Ssa#NM_001173718.1	ssa-miR-205b-5p,ssa-miR-novel-16-5p,ssa-miR-8163-5p,ssa-miR-novel-16-3p,ssa-miR-122-2-3p	Ran-binding protein 9,ran-binding protein 9 isoform X3	protein binding
RANBP3L	GIYK01064066,GIYK01064065	Ssa#XM_014128339.1,Ssa#XM_014128339.1	ssa-miR-15e-5p,ssa-miR-153a-3p,ssa-miR-218a-5p,ssa-miR-222a-5p,ssa-miR-15d-5p,ssa-miR-200b-3p	ran-binding protein 3-like isoform X2	intracellular transport
RANBP1	GIYK01048651,GIYK01048649,GIYK01048650,GIYK01048652,GIYK01054320,GIYK01054317,GIYK01048653,GIYK01048647,GIYK01048648	Ssa#XM_014161570.1,Ssa#XM_014161570.1,Ssa#XM_014161570.1,Ssa#XM_014161570.1,Ssa#XM_014161570.1,Ssa#XM_014161570.1,Ssa#XM_014161570.1,Ssa#XM_014161570.1,Ssa#XM_014161570.1	ssa-miR-101b-3p,ssa-miR-1-3p,ssa-miR-15e-5p,ssa-miR-101a-3p,ssa-miR-205b-5p,ssa-miR-15d-5p,ssa-miR-457ab-5p,ssa-miR-novel-16-3p,ssa-miR-19a-2-3p,ssa-miR-214-3-3p	Ran-specific GTPase-activating protein	intracellular transport
RANBP1	GIYK01054323,GIYK01054318	Ssa#XM_014161570.1,Ssa#XM_014161570.1	ssa-miR-205b-5p,ssa-miR-19a-2-3p,ssa-miR-214-3-3p	Ran-specific GTPase-activating protein	intracellular transport
RANBP1	GIYK01054319,GIYK01054322,GIYK01054324,GIYK01054321	Ssa#XM_014161570.1,Ssa#XM_014161570.1,Ssa#XM_014161570.1,Ssa#XM_014161570.1	ssa-miR-101b-3p,ssa-miR-101a-3p,ssa-miR-17-5p,ssa-miR-106a-5p,ssa-miR-106b-5p,ssa-miR-93a-5p,ssa-miR-205b-5p,ssa-miR-novel-16-3p,ssa-miR-20a-5p,ssa-miR-19a-2-3p,ssa-miR-214-3-3p		intracellular transport
RALGAPB	GIYK01052662	Ssa#XM_014200937.1	ssa-miR-101b-3p,ssa-miR-462b-5p,ssa-miR-101a-3p,ssa-miR-200b-3p	ral GTPase-activating protein subunit beta-like isoform X7	GTPase activator activity,regulation of small GTPase mediated signal transduction,positive regulation of GTPase activity
RAF1	GIYK01052815,GIYK01063598,GIYK01063597	Ssa#NM_001173723.1,Ssa#NM_001173723.1,Ssa#NM_001173723.1	ssa-miR-novel-16-3p,ssa-miR-214-3-3p	RAF proto-oncogene serine/threonine-protein kinase isoform X1,RAF proto-oncogene serine/threonine-protein kinase isoform X2	metal ion binding,protein serine/threonine kinase activity,ATP binding,protein phosphorylation,intracellular signal transduction
RAF1	GIYK01052816	Ssa#NM_001173723.1	ssa-miR-551a-3p,ssa-miR-novel-16-3p,ssa-miR-214-3-3p	RAF proto-oncogene serine/threonine-protein kinase isoform X2	metal ion binding,protein serine/threonine kinase activity,ATP binding,protein phosphorylation,intracellular signal transduction
RAD54L2	GIYK01038935,GIYK01038936	Ssa#XM_014146346.1,Ssa#XM_014146346.1	ssa-miR-30a-1-2-5p,ssa-miR-153a-3p,ssa-miR-101a-3p,ssa-miR-17-5p,ssa-miR-106a-5p,ssa-miR-106b-5p,ssa-miR-93a-5p,ssa-miR-novel-16-3p,ssa-miR-222a-5p,ssa-miR-30e-5p,ssa-miR-20a-5p	helicase ARIP4-like isoform X2	ATP binding,helicase activity
rad51	GIYK01038273	Ssa#NM_001140555.1	ssa-miR-222a-5p	DNA repair protein RAD51 homolog 1	mitotic recombination-dependent replication fork processing,nucleus,ATP binding,double-stranded DNA binding,recombinase activity,single-stranded DNA binding,response to cadmium ion,hematopoietic stem cell proliferation,response to methylmercury,double-strand break repair via homologous recombination,DNA-dependent ATPase activity
RAD51	GIYK01038272	Ssa#NM_001140555.1	ssa-miR-455-3p	DNA repair protein RAD51 homolog 1	hematopoietic stem cell proliferation,mitotic recombination-dependent replication fork processing,recombinase activity,response to methylmercury,ATP binding,DNA-dependent ATPase activity,response to cadmium ion,single-stranded DNA binding,double-strand break repair via homologous recombination,nucleus,double-stranded DNA binding
RAD23A	GIYK01008425	Ssa#XM_014193192.1	ssa-miR-216c-3p,ssa-miR-205b-5p,ssa-miR-18bc-5p	UV excision repair protein RAD23 homolog A-like isoform X1	ubiquitin binding,cytosol,proteasome-mediated ubiquitin-dependent protein catabolic process,damaged DNA binding,host cell nucleus,polyubiquitin modification-dependent protein binding,nucleoplasm,nucleotide-excision repair
racgap1	GIYK01033074,GIYK01033075,GIYK01033076,GIYK01033073	Ssa#XM_014136173.1,Ssa#XM_014136173.1,Ssa#XM_014136173.1,Ssa#XM_014136173.1	ssa-miR-203b-3p,ssa-miR-462b-5p,ssa-miR-200b-3p	rac GTPase-activating protein 1	intracellular signal transduction,metal ion binding,mitotic cytokinesis,microtubule cytoskeleton organization
RAC1	GIYK01059557,GIYK01059555	Ssa#XM_014179787.1,Ssa#XM_014179787.1	ssa-miR-1-3p,ssa-miR-101a-3p,ssa-miR-214-1-2-3p,ssa-miR-novel-16-5p,ssa-miR-206-3p,ssa-miR-8163-5p,ssa-miR-200b-3p	ras-related C3 botulinum toxin substrate 1	actin filament,positive regulation of actin filament polymerization,hyperosmotic response,regulation of cell adhesion involved in heart morphogenesis,neuron migration,regulation of neuron maturation,lamellipodium,kinocilium,cochlea morphogenesis,cell cortex,negative regulation of interleukin-23 production,Fc-epsilon receptor signaling pathway,dendritic spine,myoblast fusion,T cell costimulation,p…
RAC1	GIYK01059558	Ssa#XM_014179787.1	ssa-miR-novel-16-5p,ssa-miR-200b-3p
RABL6	GIYK01054195,GIYK01054193,GIYK01054194	Ssa#XM_014171013.1,Ssa#XM_014171013.1,Ssa#XM_014171013.1	ssa-miR-15e-5p,ssa-miR-222b-3p,ssa-miR-18bc-5p,ssa-miR-15d-5p,ssa-miR-221-3p,ssa-miR-457ab-5p,ssa-miR-200b-3p	rab-like protein 6 isoform X2,rab-like protein 6 isoform X1	GTP binding
RABIF	GIYK01052180	Ssa#XM_014132538.1	ssa-miR-15d-5p,ssa-miR-15e-5p,ssa-miR-457ab-5p,ssa-miR-novel-16-3p	guanine nucleotide exchange factor MSS4-like	small GTPase mediated signal transduction,guanyl-nucleotide exchange factor activity
RABIF	GIYK01052181	Ssa#XM_014132538.1	ssa-miR-15d-5p,ssa-miR-15e-5p,ssa-miR-457ab-5p,ssa-miR-novel-16-3p	guanine nucleotide exchange factor MSS4-like	small GTPase mediated signal transduction,guanyl-nucleotide exchange factor activity
RABAC1	GIYK01013020,GIYK01013019,GIYK01013018,GIYK01013017	Ssa#XM_014200410.1,Ssa#XM_014200410.1,Ssa#XM_014200410.1,Ssa#XM_014200410.1	ssa-miR-17-5p,ssa-miR-106a-5p,ssa-miR-106b-5p,ssa-miR-93a-5p,ssa-miR-18bc-5p,ssa-miR-20a-5p,ssa-miR-200b-3p	prenylated Rab acceptor protein 1-like isoform X2,prenylated Rab acceptor protein 1-like isoform X5	integral component of membrane
Rab7a	GIYK01051650	Ssa#XM_014133381.1	ssa-miR-17-5p,ssa-miR-106a-5p,ssa-miR-novel-16-3p,ssa-miR-216c-3p,ssa-miR-20a-5p,ssa-miR-19a-2-3p	Ras-related protein Rab-7a	lipophagy,positive regulation of protein catabolic process,autophagosome assembly,GTPase activity,endosome to lysosome transport,phagosome-lysosome fusion,bone resorption,alveolar lamellar body,cytosol,establishment of vesicle localization,late endosome membrane,GDP binding,Rac GTPase binding,Rab protein signal transduction,extrinsic component of lysosome membrane,viral release from host cell,pro…
Rab7a	GIYK01051649,GIYK01031116,GIYK01031117,GIYK01031118	Ssa#XM_014133381.1,Ssa#XM_014133381.1,Ssa#XM_014133381.1,Ssa#XM_014133381.1	ssa-miR-218a-5p,ssa-miR-17-5p,ssa-miR-106a-5p,ssa-miR-93a-5p,ssa-miR-novel-13-5p,ssa-miR-novel-16-3p,ssa-miR-203b-3p,ssa-miR-novel-16-5p,ssa-miR-216c-3p,ssa-miR-20a-5p,ssa-miR-19a-2-3p	ras-related protein rab7	protein targeting to lysosome,cytosol,positive regulation of viral process,phagocytic vesicle,early endosome to late endosome transport,GTP binding,late endosome membrane,endosomal transport,lysosomal membrane,positive regulation of protein catabolic process,lipid catabolic process,GTPase activity,Rab protein signal transduction,endosome to lysosome transport,phagosome-lysosome fusion
RAB5C	GIYK01015713,GIYK01008154	Ssa#XM_014204108.1,Ssa#XM_014204108.1	ssa-miR-221-3p,ssa-miR-222b-3p,ssa-miR-214-3-3p	Ras-related protein Rab-5C	GTP binding,gastrulation with mouth forming second,cell-cell adhesion,angiogenesis,regulation of endocytosis,GTPase activity,early endosome
RAB5C	GIYK01015712	Ssa#XM_014204108.1	ssa-miR-221-3p,ssa-miR-222b-3p,ssa-miR-214-3-3p,ssa-miR-206-3p	Ras-related protein Rab-5C	GTP binding,gastrulation with mouth forming second,cell-cell adhesion,angiogenesis,regulation of endocytosis,GTPase activity,early endosome
RAB5C	GIYK01015716	Ssa#XM_014204108.1	ssa-miR-221-3p,ssa-miR-222b-3p,ssa-miR-214-3-3p	ras-related protein Rab-5C	GTP binding,gastrulation with mouth forming second,cell-cell adhesion,angiogenesis,regulation of endocytosis,GTPase activity,early endosome
RAB5C	GIYK01015715,GIYK01015714	Ssa#XM_014204108.1,Ssa#XM_014204108.1	ssa-miR-221-3p,ssa-miR-222b-3p,ssa-miR-214-3-3p	ras-related protein Rab-5C-like isoform X2	GTP binding,GTPase activity
RAB5A	GIYK01058648,GIYK01058650,GIYK01058645,GIYK01058646,GIYK01058643	Ssa#XM_014178400.1,Ssa#XM_014178400.1,Ssa#XM_014178400.1,Ssa#XM_014178400.1,Ssa#XM_014178400.1	ssa-miR-novel-16-3p,ssa-miR-101a-3p,ssa-miR-214-3-3p	ras-related protein Rab-5A	GTP binding,endomembrane system,intracellular protein transport,GTPase activity,Rab protein signal transduction,endocytosis
RAB5A	GIYK01058642,GIYK01058649,GIYK01058647	Ssa#XM_014178400.1,Ssa#XM_014178400.1,Ssa#XM_014178400.1	ssa-miR-novel-16-3p,ssa-miR-101a-3p,ssa-miR-214-3-3p	ras-related protein Rab-5A	GTP binding,GTPase activity
RAB4A	GIYK01001938,GIYK01001937,GIYK01001939	Ssa#XM_014210224.1,Ssa#XM_014210224.1,Ssa#XM_014210224.1	ssa-miR-214-1-2-3p	ras-related protein Rab-4A,Ras-related protein Rab-4A	extracellular exosome,GTP binding,endosome,GDP binding,perinuclear region of cytoplasm,intracellular protein transport,postsynaptic recycling endosome,regulation of endocytosis,GTPase activity,Rab protein signal transduction,vasculature development,antigen processing and presentation,protein transport
RAB38	GIYK01017802,GIYK01017801	Ssa#XM_014207417.1,Ssa#XM_014207417.1	ssa-miR-8163-5p,ssa-miR-462b-5p,ssa-miR-205b-5p,ssa-miR-200b-3p	ras-related protein Rab-38-like	mitochondrion,vesicle-mediated transport,GTP binding,intracellular protein transport,melanosome,trans-Golgi network,GTPase activity,Rab protein signal transduction,melanosome organization
RAB37	GIYK01008863,GIYK01008850,GIYK01008867,GIYK01008854,GIYK01015028,GIYK01008851,GIYK01008864,GIYK01015034,GIYK01015029,GIYK01008855,GIYK01008861,GIYK01008853,GIYK01015026,GIYK01008852,GIYK01008858,GIYK01008856,GIYK01008857,GIYK01008859,GIYK01008865,GIYK01008866,GIYK01015030,GIYK01015033	Ssa#XM_014193635.1,Ssa#XM_014193635.1,Ssa#XM_014193635.1,Ssa#XM_014193635.1,Ssa#XM_014193635.1,Ssa#XM_014193635.1,Ssa#XM_014193635.1,Ssa#XM_014193635.1,Ssa#XM_014193635.1,Ssa#XM_014193635.1,Ssa#XM_014193635.1,Ssa#XM_014193635.1,Ssa#XM_014193635.1,Ssa#XM_014193635.1,Ssa#XM_014193635.1,Ssa#XM_014193635.1,Ssa#XM_014193635.1,Ssa#XM_014193635.1,Ssa#XM_014193635.1,Ssa#XM_014193635.1,Ssa#XM_014193635.1,…	ssa-miR-30a-1-2-5p,ssa-miR-1-3p,ssa-miR-222b-3p,ssa-miR-218a-5p,ssa-miR-221-3p,ssa-miR-203b-3p,ssa-miR-30e-5p,ssa-miR-novel-16-5p,ssa-miR-206-3p,ssa-miR-8163-5p,ssa-miR-214-3-3p,ssa-miR-19a-2-3p,ssa-miR-200b-3p	ras-related protein Rab-26-like,ras-related protein Rab-37-like isoform X2,ras-related protein Rab-37-like	GTP binding,GTPase activity
RAB37	GIYK01008860,GIYK01008862,GIYK01015031,GIYK01015027	Ssa#XM_014193635.1,Ssa#XM_014193635.1,Ssa#XM_014193635.1,Ssa#XM_014193635.1	ssa-miR-30a-1-2-5p,ssa-miR-30e-5p,ssa-miR-8163-5p,ssa-miR-19a-2-3p,ssa-miR-200b-3p	ras-related protein Rab-37-like isoform X2	GTP binding,GTPase activity
RAB37	GIYK01015032	Ssa#XM_014193635.1	ssa-miR-222b-3p,ssa-miR-218a-5p,ssa-miR-221-3p,ssa-miR-8163-5p,ssa-miR-200b-3p	ras-related protein Rab-37-like isoform X2	GTP binding,GTPase activity
rab35	GIYK01048043	Ssa#NM_001141090.1	ssa-miR-200b-3p	ras-related protein Rab-35 isoform X1	GTP binding,GTPase activity
rab35	GIYK01048044	Ssa#NM_001141090.1	ssa-miR-200b-3p	ras-related protein Rab-35 isoform X1	GTP binding,GTPase activity
RAB33B	GIYK01020857	Ssa#XM_014214075.1	ssa-miR-101b-3p,ssa-miR-203b-3p,ssa-miR-novel-16-5p,ssa-miR-101a-3p	ras-related protein Rab-33B-like	GTP binding,GTPase activity
rab33b	GIYK01012468,GIYK01020858	Ssa#NM_001146637.1,Ssa#XM_014214075.1	ssa-miR-101b-3p,ssa-miR-218a-5p,ssa-miR-101a-3p,ssa-miR-93a-5p,ssa-miR-106a-5p,ssa-miR-203b-3p,ssa-miR-novel-16-5p,ssa-miR-20a-5p	ras-related protein Rab-33B-like	Rab protein signal transduction,GTP binding,GTPase activity
rab32	GIYK01016773,GIYK01038634	Ssa#XM_014205578.1,Ssa#XM_014214075.1	ssa-miR-101b-3p,ssa-miR-101a-3p,ssa-miR-146b-5p,ssa-miR-novel-13-5p,ssa-miR-novel-16-5p,ssa-miR-146a-5p,ssa-miR-214-3-3p	ras-related protein Rab-32	vesicle,vesicle-mediated transport,GTP binding,notochord cell vacuolation,trans-Golgi network,GTPase activity
RAB1B	GIYK01017270	Ssa#XM_014206596.1	ssa-miR-novel-13-5p,ssa-miR-214-1-2-3p,ssa-miR-206-3p,ssa-miR-551a-3p,ssa-miR-novel-16-3p,ssa-miR-19a-2-3p,ssa-miR-214-3-3p	ras-related protein Rab-1B	GTP binding,endomembrane system,intracellular protein transport,autophagosome assembly,GTPase activity,Rab protein signal transduction
RAB1A	GIYK01044467,GIYK01044469,GIYK01044468,GIYK01044466	Ssa#XM_014154016.1,Ssa#XM_014154016.1,Ssa#XM_014154016.1,Ssa#XM_014154016.1	ssa-miR-101b-3p,ssa-miR-101a-3p	Ras-related protein Rab-1A	GTP binding,endomembrane system,intracellular protein transport,autophagosome assembly,GTPase activity,Rab protein signal transduction
RAB14	GIYK01027920,GIYK01027919	Ssa#XM_014128751.1,Ssa#XM_014128751.1	ssa-miR-15e-5p,ssa-miR-15d-5p,ssa-miR-457ab-5p,ssa-miR-novel-16-5p,ssa-miR-novel-16-3p,ssa-miR-214-3-3p	ras-related protein Rab-14	cytosol,phagocytic vesicle,phagosome maturation,Golgi to endosome transport,GTP binding,defense response to bacterium,trans-Golgi network,GTPase activity,recycling endosome,endocytic recycling
RAB14	GIYK01027921	Ssa#XM_014128751.1	ssa-miR-novel-16-3p,ssa-miR-novel-16-5p,ssa-miR-214-3-3p	Ras-related protein Rab-14	cytosol,phagocytic vesicle,phagosome maturation,Golgi to endosome transport,GTP binding,defense response to bacterium,trans-Golgi network,GTPase activity,recycling endosome,endocytic recycling
QSOX1	GIYK01053413,GIYK01053415,GIYK01023983,GIYK01053414	Ssa#XM_014216690.1,Ssa#XM_014216690.1,Ssa#XM_014216690.1,Ssa#XM_014216690.1	ssa-miR-15e-5p,ssa-miR-1-3p,ssa-miR-222b-3p,ssa-miR-205b-5p,ssa-miR-221-3p,ssa-miR-206-3p,ssa-miR-8163-5p,ssa-miR-214-3-3p,ssa-miR-novel-16-3p,ssa-miR-200b-3p	sulfhydryl oxidase 1-like	cell redox homeostasis,integral component of membrane,flavin-linked sulfhydryl oxidase activity,oxidation-reduction process
QSOX1	GIYK01053417,GIYK01053418,GIYK01053416	Ssa#XM_014216690.1,Ssa#XM_014216690.1,Ssa#XM_014216690.1	ssa-miR-1-3p,ssa-miR-206-3p,ssa-miR-8163-5p,ssa-miR-novel-16-3p,ssa-miR-200b-3p	Sulfhydryl oxidase	oxidation-reduction process,flavin-linked sulfhydryl oxidase activity
QDPR	GIYK01012231	Ssa#XM_014149010.1	ssa-let-7b-3p,ssa-let-7j-3p	dihydropteridine reductase-like	oxidation-reduction process,oxidoreductase activity
pyroxd2	GIYK01002014,GIYK01002015	Ssa#NM_001141738.1,Ssa#NM_001141738.1	ssa-miR-101b-3p,ssa-miR-205b-5p,ssa-miR-novel-16-5p,ssa-miR-101a-3p	pyridine nucleotide-disulfide oxidoreductase domain-containing protein 2	oxidation-reduction process,oxidoreductase activity
pyroxd2	GIYK01002016	Ssa#NM_001141738.1	ssa-miR-101b-3p,ssa-miR-205b-5p,ssa-miR-novel-16-5p,ssa-miR-101a-3p	pyridine nucleotide-disulfide oxidoreductase domain-containing protein 2	oxidation-reduction process,oxidoreductase activity
PYCR1	GIYK01006303	Ssa#XM_014130378.1	ssa-miR-1-3p,ssa-miR-206-3p	pyrroline-5-carboxylate reductase 1, mitochondrial-like
PYCR1	GIYK01006304	Ssa#XM_014183602.1	ssa-miR-30a-1-2-5p,ssa-miR-1-3p,ssa-miR-205b-5p,ssa-miR-551a-3p,ssa-miR-30e-5p,ssa-miR-206-3p,ssa-miR-301a-5p	pyrroline-5-carboxylate reductase 1, mitochondrial-like	oxidation-reduction process,pyrroline-5-carboxylate reductase activity,proline biosynthetic process
PYCR1	GIYK01065891,GIYK01065890,GIYK01065889,GIYK01063465,GIYK01065888	Ssa#XM_014183602.1,Ssa#XM_014183602.1,Ssa#XM_014183602.1,Ssa#XM_014183602.1,Ssa#XM_014183602.1	ssa-miR-30a-1-2-5p,ssa-miR-1-3p,ssa-miR-222b-3p,ssa-miR-205b-5p,ssa-miR-551a-3p,ssa-miR-221-3p,ssa-miR-30e-5p,ssa-miR-206-3p,ssa-miR-301a-5p,ssa-miR-200b-3p	pyrroline-5-carboxylate reductase 1, mitochondrial-like	oxidation-reduction process,pyrroline-5-carboxylate reductase activity,L-proline biosynthetic process
PYCR1	GIYK01065893	Ssa#XM_014183602.1	ssa-miR-30a-1-2-5p,ssa-miR-1-3p,ssa-miR-205b-5p,ssa-miR-551a-3p,ssa-miR-30e-5p,ssa-miR-206-3p,ssa-miR-301a-5p	pyrroline-5-carboxylate reductase 1, mitochondrial-like
PYCR1	GIYK01065892	Ssa#XM_014183602.1	ssa-miR-30a-1-2-5p,ssa-miR-1-3p,ssa-miR-205b-5p,ssa-miR-551a-3p,ssa-miR-30e-5p,ssa-miR-206-3p,ssa-miR-301a-5p	pyrroline-5-carboxylate reductase 1, mitochondrial-like	oxidation-reduction process,pyrroline-5-carboxylate reductase activity,L-proline biosynthetic process
pwwp2b	GIYK01044304	Ssa#XM_014200312.1	ssa-miR-101b-3p,ssa-miR-15e-5p,ssa-miR-101a-3p,ssa-miR-17-5p,ssa-miR-106a-5p,ssa-miR-106b-5p,ssa-miR-93a-5p,ssa-miR-15d-5p,ssa-miR-214-1-2-3p,ssa-miR-20a-5p,ssa-miR-214-3-3p	PWWP domain-containing protein 2B-like isoform X1
pwp2	GIYK01042222,GIYK01042218,GIYK01042220	Ssa#NM_001173585.1,Ssa#NM_001173585.1,Ssa#NM_001173585.1	ssa-miR-101b-3p,ssa-miR-1-3p,ssa-miR-101a-3p,ssa-miR-17-5p,ssa-miR-106a-5p,ssa-miR-106b-5p,ssa-miR-93a-5p,ssa-let-7e-5p,ssa-miR-214-1-2-3p,ssa-miR-206-3p,ssa-miR-20a-5p	periodic tryptophan protein 2 homolog	protein binding
pwp2	GIYK01042219,GIYK01042221,GIYK01043066,GIYK01043065	Ssa#NM_001173585.1,Ssa#NM_001173585.1,Ssa#NM_001173585.1,Ssa#NM_001173585.1	ssa-miR-101b-3p,ssa-miR-1-3p,ssa-miR-222b-3p,ssa-miR-101a-3p,ssa-miR-221-3p,ssa-miR-206-3p	Periodic tryptophan protein 2 homolog,periodic tryptophan protein 2 homolog	protein binding,digestive system development,ribosomal small subunit assembly
pus7	GIYK01025098,GIYK01025097,GIYK01025099	Ssa#NM_001141737.1,Ssa#NM_001141737.1,Ssa#NM_001141737.1	ssa-miR-17-5p,ssa-miR-106a-5p,ssa-miR-106b-5p,ssa-miR-93a-5p,ssa-miR-146b-5p,ssa-miR-novel-16-3p,ssa-miR-222a-5p,ssa-miR-146d-5p,ssa-miR-146a-5p,ssa-miR-20a-5p	pseudouridylate synthase 7 homolog	RNA binding,pseudouridine synthase activity,pseudouridine synthesis,pseudouridylate synthase activity
pura2	GIYK01010538,GIYK01010535,GIYK01010533	Ssa#XM_014136750.1,Ssa#XM_014136750.1,Ssa#XM_014136750.1	ssa-miR-205b-5p,ssa-miR-19a-2-3p,ssa-miR-122-2-3p	adenylosuccinate synthetase isozyme 2-like isoform X2	purine nucleotide biosynthetic process,adenylosuccinate synthase activity,GTP binding
pum2	GIYK01037807,GIYK01037811,GIYK01037808,GIYK01037809	Ssa#XM_014143940.1,Ssa#XM_014143940.1,Ssa#XM_014143940.1,Ssa#XM_014143940.1	ssa-miR-301a-5p,ssa-miR-203b-3p,ssa-miR-218a-5p	pumilio homolog 2 isoform X4	RNA binding
pum2	GIYK01037812	Ssa#XM_014143940.1	ssa-miR-301a-5p,ssa-miR-203b-3p,ssa-miR-218a-5p	hypothetical protein DNTS_018596	RNA binding
pum2	GIYK01037810	Ssa#XM_014143940.1	ssa-miR-301a-5p,ssa-miR-203b-3p,ssa-miR-218a-5p	unnamed protein product	RNA binding
PUDP	GIYK01042579	Ssa#NM_001141007.1	ssa-miR-novel-13-5p	pseudouridine-5'-phosphatase isoform X1	hydrolase activity
PTTG1IP	GIYK01041854	Ssa#XM_014171413.1	ssa-miR-203b-3p,ssa-miR-153a-3p,ssa-miR-18bc-5p	pituitary tumor-transforming gene 1 protein-interacting protein-like	integral component of membrane
PTTG1	GIYK01020528	Ssa#NM_001165263.1	ssa-miR-210-1-5p,ssa-miR-8163-3p
PTTG1	GIYK01020529	Ssa#NM_001165263.1	ssa-miR-210-1-5p,ssa-miR-8163-3p	securin-like isoform X1	chromosome organization,cytoplasm,nucleus
PTRH1	GIYK01047930	Ssa#XM_014160579.1	ssa-miR-15d-5p,ssa-miR-15e-5p,ssa-miR-457ab-5p	probable peptidyl-tRNA hydrolase	aminoacyl-tRNA hydrolase activity
PTRH1	GIYK01054949,GIYK01054950,GIYK01054947,GIYK01054951,GIYK01054948	Ssa#XM_014171559.1,Ssa#XM_014171559.1,Ssa#XM_014171559.1,Ssa#XM_014171559.1,Ssa#XM_014171559.1	ssa-miR-15d-5p,ssa-miR-15e-5p,ssa-miR-216c-3p,ssa-miR-457ab-5p	probable peptidyl-tRNA hydrolase	,aminoacyl-tRNA hydrolase activity
ptrf	GIYK01047038,GIYK01047039	Ssa#XM_014158728.1,Ssa#XM_014158728.1	ssa-miR-205b-5p,ssa-miR-214-3-3p	caveolae-associated protein 1	termination of RNA polymerase I transcription,caveola,notochord development
PTPRU	GIYK01060636	Ssa#XM_014159782.1	ssa-miR-19a-2-3p	receptor-type tyrosine-protein phosphatase mu-like isoform X3	protein dephosphorylation,protein tyrosine phosphatase activity,membrane,protein binding
PTPRU	GIYK01047395,GIYK01060637,GIYK01060638	Ssa#XM_014159782.1,Ssa#XM_014159782.1,Ssa#XM_014159782.1	ssa-miR-218a-5p,ssa-miR-19a-2-3p	receptor-type tyrosine-protein phosphatase mu-like isoform X3,receptor-type tyrosine-protein phosphatase mu-like isoform X2	integral component of membrane,protein dephosphorylation,protein tyrosine phosphatase activity,protein binding,peptidyl-tyrosine dephosphorylation
PTPRN2	GIYK01006995	Ssa#XM_014190720.1	ssa-miR-101b-3p,ssa-miR-101a-3p	receptor-type tyrosine-protein phosphatase N2-like isoform X1	integral component of membrane,protein tyrosine phosphatase activity,secretory granule,insulin secretion involved in cellular response to glucose stimulus,peptidyl-tyrosine dephosphorylation
ptprg	GIYK01030880	Ssa#XM_014133451.1	ssa-miR-30a-1-2-5p,ssa-miR-15e-5p,ssa-miR-1-3p,ssa-miR-30a-3-4-5p,ssa-miR-222a-5p,ssa-miR-15d-5p,ssa-miR-30e-5p,ssa-miR-457ab-5p,ssa-miR-206-3p,ssa-miR-216c-3p,ssa-miR-200b-3p	receptor-type tyrosine-protein phosphatase gamma-like	integral component of membrane,peptidyl-tyrosine dephosphorylation,protein tyrosine phosphatase activity,protein binding
PTPN3	GIYK01014198,GIYK01070640	Ssa#XM_014185251.1,Ssa#XM_014185251.1	ssa-miR-101b-3p,ssa-miR-101a-3p	tyrosine-protein phosphatase non-receptor type 3-like isoform X1	peptidyl-tyrosine dephosphorylation,cytoskeleton,protein tyrosine phosphatase activity,protein binding
ptpmt1	GIYK01056645,GIYK01056644,GIYK01056643	Ssa#XM_014175092.1,Ssa#XM_014175092.1,Ssa#XM_014175092.1	ssa-miR-15d-5p,ssa-miR-15e-5p,ssa-miR-novel-1-3p	phosphatidylglycerophosphatase and protein-tyrosine phosphatase 1 isoform X1,phosphatidylglycerophosphatase and protein-tyrosine phosphatase 1	peptidyl-tyrosine dephosphorylation,protein tyrosine phosphatase activity,protein tyrosine/serine/threonine phosphatase activity
PTP4A2	GIYK01020213,GIYK01020214	Ssa#XM_014211150.1,Ssa#XM_014211150.1	ssa-miR-214-3-3p	protein tyrosine phosphatase type IVA 2-like	protein dephosphorylation,protein tyrosine/serine/threonine phosphatase activity
PTN6	GIYK01004189	Ssa#XM_014181732.1	ssa-miR-30a-1-2-5p,ssa-miR-30a-3-4-5p,ssa-miR-30e-5p,ssa-miR-218a-5p	tyrosine-protein phosphatase non-receptor type 6-like isoform X1	peptidyl-tyrosine dephosphorylation,protein tyrosine phosphatase activity
PTMA	GIYK01024594,GIYK01024602,GIYK01024595,GIYK01024598,GIYK01024596,GIYK01024599,GIYK01024600,GIYK01024601,GIYK01024593,GIYK01024592	Ssa#XM_014123596.1,Ssa#XM_014123596.1,Ssa#XM_014123596.1,Ssa#XM_014123596.1,Ssa#XM_014123596.1,Ssa#XM_014123596.1,Ssa#XM_014123596.1,Ssa#XM_014123596.1,Ssa#XM_014123596.1,Ssa#XM_014123596.1	ssa-miR-novel-2-5p	prothymosin alpha-A isoform X3,prothymosin alpha-A-like isoform X2
PTK7	GIYK01029618,GIYK01029619,GIYK01005364	Ssa#XM_014171246.1,Ssa#XM_014171246.1,Ssa#XM_014171246.1	ssa-miR-novel-16-3p,ssa-miR-205b-5p	inactive tyrosine-protein kinase 7-like	integral component of membrane,skeletal system development,negative regulation of canonical Wnt signaling pathway,regulation of planar cell polarity pathway involved in axis elongation,protein kinase activity,ATP binding,extracellular region,protein phosphorylation,segmentation,cerebrospinal fluid circulation
PTK2	GIYK01014230	Ssa#XM_014202099.1	ssa-miR-30a-1-2-5p,ssa-miR-30a-3-4-5p,ssa-miR-30e-5p,ssa-miR-200b-3p	focal adhesion kinase 1-like	signal complex assembly,focal adhesion,protein tyrosine kinase activity,protein phosphorylation
PTK2	GIYK01062145,GIYK01062146,GIYK01062147	Ssa#XM_014202099.1,Ssa#XM_014202099.1,Ssa#XM_014202099.1	ssa-miR-455-3p,ssa-miR-125b-1-3p	focal adhesion kinase 1-like isoform X2,focal adhesion kinase 1-like isoform X6	protein tyrosine kinase activity,ATP binding,focal adhesion,cytoskeleton,protein phosphorylation,signal complex assembly
PTGIS	GIYK01030209,GIYK01030208,GIYK01030206,GIYK01030207	Ssa#XM_014132335.1,Ssa#XM_014132335.1,Ssa#XM_014132335.1,Ssa#XM_014132335.1	ssa-miR-101b-3p,ssa-miR-101a-3p	prostacyclin synthase-like	endoplasmic reticulum membrane,heme binding,iron ion binding,oxidation-reduction process,prostaglandin biosynthetic process,oxidoreductase activity acting on paired donors with incorporation or reduction of molecular oxygen,prostaglandin-I synthase activity,endoplasmic reticulum,monooxygenase activity
PTGFRN	GIYK01065598	Ssa#XM_014198943.1	ssa-miR-221-3p,ssa-miR-222b-3p,ssa-miR-novel-16-3p	Prostaglandin F2 receptor negative regulator-like
PTGES3	GIYK01039950,GIYK01039949	Ssa#XM_014147081.1,Ssa#XM_014147081.1	ssa-miR-205b-5p	Prostaglandin E synthase 3
PTGDS	GIYK01054955,GIYK01054959	Ssa#XM_014171552.1,Ssa#XM_014171552.1	ssa-miR-15d-5p,ssa-miR-15e-5p,ssa-miR-457ab-5p,ssa-miR-novel-16-5p	prostaglandin-H2 D-isomerase-like	small molecule binding
PTGDS	GIYK01054956	Ssa#XM_014171552.1	ssa-miR-93a-5p,ssa-miR-106a-5p,ssa-miR-106b-5p,ssa-miR-17-5p,ssa-miR-20a-5p	prostaglandin-H2 D-isomerase-like	small molecule binding
PTDSS1	GIYK01032998	Ssa#XM_014136138.1	ssa-miR-15d-5p,ssa-miR-15e-5p,ssa-miR-457ab-5p	transmembrane protein 269 isoform X2	phospholipid biosynthetic process,phosphotransferase activity for other substituted phosphate groups,integral component of membrane
PTCD1	GIYK01059279	Ssa#XM_014179402.1	ssa-miR-15e-3p	pentatricopeptide repeat-containing protein 1, mitochondrial-like	protein binding
ptbp2	GIYK01046054,GIYK01046049,GIYK01046052,GIYK01046051,GIYK01046050	Ssa#NM_001140032.1,Ssa#NM_001140032.1,Ssa#NM_001140032.1,Ssa#NM_001140032.1,Ssa#NM_001140032.1	ssa-miR-214-3-3p	polypyrimidine tract-binding protein 2-like isoform X1,polypyrimidine tract-binding protein 2-like isoform X2	nucleus,RNA binding,mRNA processing
ptbp2	GIYK01046055,GIYK01046053	Ssa#NM_001140032.1,Ssa#NM_001140032.1	ssa-miR-8163-5p,ssa-miR-101a-3p,ssa-miR-214-3-3p	polypyrimidine tract-binding protein 2 isoform X3	nucleus,RNA binding,mRNA processing
PTBP1	GIYK01023273,GIYK01023269,GIYK01023272,GIYK01023271,GIYK01023270	Ssa#XM_014215979.1,Ssa#XM_014215979.1,Ssa#XM_014215979.1,Ssa#XM_014215979.1,Ssa#XM_014215979.1	ssa-miR-15e-5p,ssa-miR-1-3p,ssa-miR-222b-3p,ssa-miR-novel-13-5p,ssa-miR-15d-5p,ssa-miR-221-3p,ssa-miR-457ab-5p,ssa-miR-206-3p,ssa-miR-214-3-3p	polypyrimidine tract-binding protein 1-like isoform X1,polypyrimidine tract-binding protein 1-like isoform X3	nucleus,RNA binding,mRNA processing
PTBP1	GIYK01023268	Ssa#XM_014215979.1	ssa-miR-15e-5p,ssa-miR-1-3p,ssa-miR-222b-3p,ssa-miR-novel-13-5p,ssa-miR-15d-5p,ssa-miR-221-3p,ssa-miR-457ab-5p,ssa-miR-206-3p,ssa-miR-214-3-3p	polypyrimidine tract-binding protein 1 isoform X2	nucleus,RNA binding,mRNA processing
PTAFR	GIYK01000170	Ssa#XM_014139800.1	ssa-miR-101b-3p,ssa-miR-222b-3p,ssa-miR-101a-3p,ssa-miR-222a-5p,ssa-miR-221-3p,ssa-miR-8163-5p	platelet-activating factor receptor-like	integral component of membrane,chemotaxis,G protein-coupled receptor signaling pathway,platelet activating factor receptor activity
PSTPIP1	GIYK01025487	Ssa#XM_014214075.1	ssa-miR-15e-5p,ssa-miR-17-5p,ssa-miR-106a-5p,ssa-miR-106b-5p,ssa-miR-93a-5p,ssa-miR-205b-5p,ssa-miR-novel-13-5p,ssa-miR-15d-5p,ssa-miR-457ab-5p,ssa-miR-214-1-2-3p,ssa-miR-206-3p,ssa-miR-8163-5p,ssa-miR-214-3-3p,ssa-miR-20a-5p,ssa-miR-122-2-3p	proline-serine-threonine phosphatase-interacting protein 1-like isoform X1	protein binding
PSMG1	GIYK01011147,GIYK01011148,GIYK01011146	Ssa#GRASP209155695,Ssa#GRASP209155695,Ssa#GRASP209155695	ssa-miR-8163-5p,ssa-miR-1-3p,ssa-miR-206-3p,ssa-miR-18bc-5p	Proteasome assembly chaperone 1	proteasome complex,proteasome assembly,endoplasmic reticulum
psme3	GIYK01046699	Ssa#XM_014158503.1	ssa-miR-222a-5p	proteasome activator complex subunit 3-like	proteasome activator complex
PSME1	GIYK01060541	Ssa#XM_014181079.1	ssa-miR-214-1-2-3p,ssa-miR-214-3-3p	Proteasome activator complex subunit 1	proteasome activator complex
psmd8	GIYK01023074,GIYK01023075	Ssa#NM_001141031.2,Ssa#NM_001141031.2	ssa-miR-30a-1-2-5p,ssa-miR-30e-5p	26S proteasome non-ATPase regulatory subunit 8	proteolysis,proteasome regulatory particle
PSMD3	GIYK01015887	Ssa#XM_014204326.1	ssa-let-7b-3p	26S proteasome non-ATPase regulatory subunit 3-like	proteasome regulatory particle lid subcomplex,regulation of protein catabolic process,protein binding,larval locomotory behavior,ubiquitin-dependent protein catabolic process,regulation of catalytic activity,enzyme regulator activity,brain development,otic vesicle development
PSMD11	GIYK01052819	Ssa#XM_014192734.1	ssa-miR-216c-3p,ssa-miR-19a-2-3p,ssa-miR-222a-5p	26S proteasome non-ATPase regulatory subunit 11A-like isoform X3	proteasome complex,proteasome assembly
PSMD11	GIYK01059017	Ssa#XM_014179078.1	ssa-miR-novel-13-5p	26S proteasome non-ATPase regulatory subunit 11B	proteasome complex,protein binding
PSMC3	GIYK01026565	Ssa#XM_014126458.1	ssa-miR-1-3p,ssa-miR-206-3p	26S proteasome regulatory subunit 6A	peptidase activity,ATP binding,cytoplasm,protein catabolic process,proteasome complex,proteolysis
PSMC2	GIYK01018684	Ssa#XM_014188389.1	ssa-miR-200b-3p	26S proteasome regulatory subunit 7	peptidase activity,positive regulation of RNA polymerase II transcription preinitiation complex assembly,ubiquitin-dependent protein catabolic process,cytosol,proteasome-activating ATPase activity,dendritic spine,regulation of mRNA stability,ATP binding,regulation of mitotic cell cycle phase transition,proteasome regulatory particle base subcomplex,positive regulation of proteasomal protein catab…
PSMB9	GIYK01036700	Ssa#NM_001123714.1	ssa-miR-455-3p	proteasome subunit beta type-9	proteolysis involved in cellular protein catabolic process,proteasome core complex beta-subunit complex,cytoplasm,threonine-type endopeptidase activity,nucleus,immune system process
psl2	GIYK01061389	Ssa#NM_001173826.1	ssa-miR-101b-3p,ssa-miR-101a-3p,ssa-miR-17-5p,ssa-miR-106a-5p,ssa-miR-106b-5p,ssa-miR-novel-16-3p,ssa-miR-20a-5p	signal peptide peptidase-like 2A isoform X1	integral component of membrane,regulation of immune response,membrane protein intracellular domain proteolysis,aspartic endopeptidase activity intramembrane cleaving
psl2	GIYK01062952,GIYK01062953,GIYK01064589,GIYK01064586,GIYK01064587,GIYK01062956,GIYK01064590,GIYK01064591,GIYK01062955,GIYK01062954,GIYK01064585,GIYK01064592	Ssa#NM_001173826.1,Ssa#NM_001173826.1,Ssa#NM_001173826.1,Ssa#NM_001173826.1,Ssa#NM_001173826.1,Ssa#NM_001173826.1,Ssa#NM_001173826.1,Ssa#NM_001173826.1,Ssa#NM_001173826.1,Ssa#NM_001173826.1,Ssa#NM_001173826.1,Ssa#NM_001173826.1	ssa-miR-101b-3p,ssa-miR-101a-3p,ssa-miR-17-5p,ssa-miR-106a-5p,ssa-miR-106b-5p,ssa-miR-novel-16-3p,ssa-miR-20a-5p	signal peptide peptidase-like 2A isoform X3,Signal peptide peptidase-like 2A,signal peptide peptidase-like 2A isoform X2,signal peptide peptidase-like 2A	integral component of membrane,regulation of immune response,membrane protein intracellular domain proteolysis,aspartic endopeptidase activity intramembrane cleaving
PSIP1	GIYK01019187,GIYK01019205	Ssa#XM_014194849.1,Ssa#XM_014194849.1	ssa-miR-15d-5p,ssa-miR-15e-5p,ssa-miR-457ab-5p,ssa-miR-novel-13-5p	lens epithelium-derived growth factor-like isoform X1, PC4 and SFRS1-interacting protein
PSIP1	GIYK01019206,GIYK01019189,GIYK01019188	Ssa#XM_014194849.1,Ssa#XM_014194849.1,Ssa#XM_014194849.1	ssa-miR-15d-5p,ssa-miR-15e-5p,ssa-miR-457ab-5p,ssa-miR-novel-13-5p	lens epithelium-derived growth factor-like isoform X1, PC4 and SFRS1-interacting protein
PSD4	GIYK01003982,GIYK01003983,GIYK01003984	Ssa#XM_014201941.1,Ssa#XM_014201941.1,Ssa#XM_014201941.1	ssa-miR-218a-5p	26S proteasome non-ATPase regulatory subunit 4-like isoform X2,26S proteasome non-ATPase regulatory subunit 4-like isoform X1	proteasome complex
PSB8	GIYK01057991	Ssa#XM_014175501.1	ssa-miR-205b-5p	proteasome subunit beta type-8-like	cytoplasm,proteolysis involved in cellular protein catabolic process,proteasome core complex,threonine-type endopeptidase activity,nucleus
PSB7	GIYK01036731	Ssa#XM_014141713.1	ssa-miR-457ab-5p	proteasome subunit beta type-7-like	cytoplasm,proteolysis involved in cellular protein catabolic process,immune system process,proteasome core complex,threonine-type endopeptidase activity,nucleus
PSAT1	GIYK01037619,GIYK01037621,GIYK01037620	Ssa#XM_014143568.1,Ssa#XM_014143568.1,Ssa#XM_014143568.1	ssa-miR-93a-5p,ssa-miR-106a-5p,ssa-miR-106b-5p,ssa-miR-17-5p,ssa-miR-20a-5p	phosphoserine aminotransferase	pyridoxal phosphate binding,cytoplasm,O-phospho-L-serine:2-oxoglutarate aminotransferase activity,L-serine biosynthetic process
PSAT1	GIYK01037622	Ssa#XM_014143568.1	ssa-miR-93a-5p,ssa-miR-106a-5p,ssa-miR-106b-5p,ssa-miR-17-5p,ssa-miR-20a-5p	hypothetical protein OJAV_G00087150	catalytic activity
PSAP	GIYK01054539,GIYK01054538,GIYK01054543	Ssa#XM_014171295.1,Ssa#XM_014171295.1,Ssa#XM_014171295.1	ssa-miR-203b-3p,ssa-miR-218a-5p,ssa-miR-19a-2-3p,ssa-miR-222a-5p	prosaposin-like isoform X1	sphingolipid metabolic process,lysosome
PSAP	GIYK01054541	Ssa#XM_014171295.1	ssa-miR-218a-5p,ssa-miR-19a-2-3p,ssa-miR-222a-5p	prosaposin-like isoform X3	sphingolipid metabolic process,lysosome
PSAP	GIYK01054542	Ssa#XM_014171295.1	ssa-miR-218a-5p,ssa-miR-19a-2-3p,ssa-miR-222a-5p	prosaposin-like isoform X3
PSA6	GIYK01049147	Ssa#XM_014162314.1	ssa-miR-214-3-3p	proteasome subunit alpha type-6-like	proteasome core complex alpha-subunit complex,proteasome-mediated ubiquitin-dependent protein catabolic process,cytoplasm,proteasomal ubiquitin-independent protein catabolic process,threonine-type endopeptidase activity,nucleus
PSA1	GIYK01025019	Ssa#XM_014124690.1	ssa-miR-19a-2-3p	proteasome subunit alpha type-1	ubiquitin-dependent protein catabolic process,proteasome core complex alpha-subunit complex,cytoplasm,threonine-type endopeptidase activity,nucleus
PRSS23	GIYK01012494,GIYK01012495	Ssa#XM_014199638.1,Ssa#XM_014199638.1	ssa-miR-216c-3p	serine protease 23-like	proteolysis,serine-type endopeptidase activity
PRSS23	GIYK01066479	Ssa#XM_014189280.1	ssa-miR-93a-5p,ssa-miR-106a-5p,ssa-miR-17-5p,ssa-miR-222a-5p,ssa-miR-20a-5p	serine protease 23	proteolysis,serine-type endopeptidase activity
PRSS16	GIYK01064321,GIYK01022262,GIYK01022263	Ssa#XM_014162036.1,Ssa#XM_014213929.1,Ssa#XM_014213929.1	ssa-miR-125b-1-3p,ssa-miR-8163-3p,ssa-let-7j-3p	thymus-specific serine protease-like,putative serine protease K12H4.7	serine-type peptidase activity,dipeptidyl-peptidase activity,proteolysis
prrc1	GIYK01003655	Ssa#XM_014143911.1	ssa-miR-15d-5p,ssa-miR-15e-5p,ssa-miR-457ab-5p	protein PRRC1	Golgi apparatus,somite specification,epithelial structure maintenance,activation of protein kinase A activity,protein kinase A regulatory subunit binding
PRR15L	GIYK01008012	Ssa#XM_014192558.1	ssa-miR-30a-1-2-5p,ssa-miR-30a-3-4-5p,ssa-miR-30e-5p	proline-rich protein 15-like protein A
PRR15L	GIYK01015866	Ssa#XM_014192558.1	ssa-miR-101b-3p,ssa-miR-15e-5p,ssa-miR-101a-3p,ssa-miR-15d-5p,ssa-miR-457ab-5p	proline-rich protein 15-like protein A
prr13	GIYK01031571	Ssa#XM_014134040.1	ssa-miR-8163-5p	proline-rich protein 13
PRPF8	GIYK01049458	Ssa#XM_014162696.1	ssa-miR-205b-5p	pre-mRNA-processing-splicing factor 8	mRNA splicing via spliceosome,oxidoreductase activity,2 iron 2 sulfur cluster binding,oxidation-reduction process,protein binding,U6 snRNA binding,spliceosomal complex,U5 snRNA binding
PRPF8	GIYK01049460,GIYK01049461,GIYK01049459	Ssa#XM_014162696.1,Ssa#XM_014162696.1,Ssa#XM_014162696.1	ssa-miR-205b-5p,ssa-miR-222a-5p	pre-mRNA-processing-splicing factor 8	mRNA splicing via spliceosome,protein binding,U6 snRNA binding,spliceosomal complex,U5 snRNA binding
PRPF40A	GIYK01055563,GIYK01055564,GIYK01055567,GIYK01055561,GIYK01055565	Ssa#XM_014173090.1,Ssa#XM_014173090.1,Ssa#XM_014173090.1,Ssa#XM_014173090.1,Ssa#XM_014173090.1	ssa-miR-novel-16-3p,ssa-miR-146d-5p,ssa-miR-146b-5p,ssa-miR-146a-5p	pre-mRNA-processing factor 40 homolog A-like isoform X1,pre-mRNA-processing factor 40 homolog A-like isoform X2	protein binding,mRNA cis splicing via spliceosome
PRPF40A	GIYK01050184,GIYK01050183,GIYK01050185,GIYK01050182,GIYK01050186,GIYK01050181	Ssa#XM_014173090.1,Ssa#XM_014173090.1,Ssa#XM_014173090.1,Ssa#XM_014173090.1,Ssa#XM_014173090.1,Ssa#XM_014173090.1	ssa-miR-301a-5p	pre-mRNA-processing factor 40 homolog A isoform X3,pre-mRNA-processing factor 40 homolog A isoform X1	protein binding,mRNA cis splicing via spliceosome
prp19	GIYK01012617	Ssa#NM_001173881.1	ssa-miR-15d-5p,ssa-miR-15e-5p,ssa-miR-457ab-5p	pre-mRNA-processing factor 19	negative regulation of DNA damage response signal transduction by p53 class mediator,protein ubiquitination,mRNA splicing via spliceosome,protein binding,DNA repair,Prp19 complex,ubiquitin protein ligase activity
PCDH18	GIYK01020838,GIYK01020837,GIYK01020840,GIYK01020839,GIYK01020841	Ssa#XM_014212359.1,Ssa#XM_014212359.1,Ssa#XM_014212359.1,Ssa#XM_014212359.1,Ssa#XM_014212359.1	ssa-miR-142b-5p	protocadherin-18-like isoform X3,protocadherin-18-like isoform X2,protocadherin-18-like isoform X1	homophilic cell adhesion via plasma membrane adhesion molecules,nervous system development,plasma membrane,calcium ion binding,integral component of membrane
PROF2	GIYK01041511	Ssa#XM_014149743.1	ssa-miR-1-3p,ssa-miR-222b-3p,ssa-miR-17-5p,ssa-miR-93a-5p,ssa-miR-221-3p,ssa-miR-206-3p,ssa-miR-8163-5p,ssa-miR-216c-3p,ssa-miR-20a-5p	profilin-2-like isoform X1	actin binding,regulation of actin filament polymerization
prodh2	GIYK01045825	Ssa#XM_014157025.1	ssa-miR-30a-1-2-5p,ssa-miR-30a-3-4-5p,ssa-miR-146b-5p,ssa-miR-30e-5p,ssa-miR-146d-5p,ssa-miR-146a-5p	hydroxyproline dehydrogenase	oxidation-reduction process,proline dehydrogenase activity,proline catabolic process
PRODH	GIYK01002790,GIYK01002789,GIYK01002788	Ssa#XM_014169390.1,Ssa#XM_014169390.1,Ssa#XM_014169390.1	ssa-miR-1-3p,ssa-miR-101a-3p,ssa-miR-214-1-2-3p,ssa-miR-206-3p,ssa-miR-214-3-3p	proline dehydrogenase 1, mitochondrial-like isoform X2,proline dehydrogenase 1, mitochondrial-like isoform X1,proline dehydrogenase 1, mitochondrial-like	oxidation-reduction process,proline dehydrogenase activity,proline catabolic process
PRMT5	GIYK01035972	Ssa#XM_014140776.1	ssa-miR-novel-13-5p	protein arginine N-methyltransferase 5-like isoform X1	histone-arginine N-methyltransferase activity,cytosol,histone arginine methylation,regulation of skeletal muscle fiber development,peptidyl-arginine N-methylation,nucleus
PRMT5	GIYK01035974,GIYK01035973,GIYK01035971	Ssa#XM_014140776.1,Ssa#XM_014140776.1,Ssa#XM_014140776.1	ssa-miR-125b-1-3p,ssa-miR-novel-10-3p	protein arginine N-methyltransferase 5-like isoform X1	regulation of skeletal muscle fiber development,nucleus,histone-arginine N-methyltransferase activity,histone arginine methylation,peptidyl-arginine N-methylation,cytosol
PRMT5	GIYK01035975	Ssa#XM_014140776.1	ssa-miR-125b-1-3p,ssa-miR-novel-10-3p	arginine N-methyltransferase 5	protein-arginine N-methyltransferase activity,peptidyl-arginine N-methylation
prmt3	GIYK01056586	Ssa#NM_001140336.1	ssa-miR-206-3p	protein arginine N-methyltransferase 3 isoform X2	protein-arginine N-methyltransferase activity,peptidyl-arginine N-methylation
PRKRA	GIYK01055730	Ssa#XM_014173320.1	ssa-miR-15d-5p,ssa-miR-457ab-5p,ssa-miR-214-3-3p	interferon-inducible double-stranded RNA-dependent protein kinase activator A homolog	enzyme activator activity,production of siRNA involved in RNA interference,double-stranded RNA binding,phosphorylation,positive regulation of catalytic activity,kinase activity
PRKD3	GIYK01000345	Ssa#XM_014152847.1	ssa-miR-1-3p,ssa-miR-17-5p,ssa-miR-106a-5p,ssa-miR-106b-5p,ssa-miR-93a-5p,ssa-miR-206-3p,ssa-miR-20a-5p,ssa-miR-200b-3p	serine/threonine-protein kinase D3-like	metal ion binding,ATP binding,cytoplasm,protein phosphorylation,intracellular signal transduction,calcium-dependent protein kinase C activity
PRG4	GIYK01040634,GIYK01040635	Ssa#XM_014148563.1,Ssa#XM_014148563.1	ssa-miR-222a-5p,ssa-miR-1-3p,ssa-miR-novel-16-3p,ssa-miR-206-3p	alpha carbonic anhydrase 8-like, Proteoglycan 4
PRG4	GIYK01012680,GIYK01012682,GIYK01012681	Ssa#XM_014199907.1,Ssa#XM_014199907.1,Ssa#XM_014199907.1	ssa-miR-15e-5p	proteoglycan 4-like isoform X2,putative protein TPRXL,unnamed protein product	protein binding,nucleolus
PRG4	GIYK01044051	Ssa#XM_014153864.1	ssa-miR-301a-5p	proteoglycan 4-like
PRF1	GIYK01065491	Ssa#XM_014187003.1	ssa-miR-125b-1-3p	perforin-1-like
PREPL	GIYK01015966	Ssa#XM_014204595.1	ssa-let-7e-5p,ssa-miR-200b-3p	prolyl endopeptidase-like	proteolysis,serine-type endopeptidase activity,serine-type exopeptidase activity
PRDX6	GIYK01035750	Ssa#XM_014140754.1	ssa-miR-15e-3p,ssa-miR-142b-5p	peroxiredoxin-6-like	oxidation-reduction process,cellular oxidant detoxification,cell redox homeostasis,peroxiredoxin activity
PRDX4	GIYK01028461,GIYK01028460	Ssa#XM_014129304.1,Ssa#XM_014129304.1	ssa-miR-101b-3p,ssa-miR-101a-3p,ssa-miR-146b-5p,ssa-miR-205b-5p,ssa-miR-222a-5p,ssa-miR-146d-5p,ssa-miR-146a-5p,ssa-miR-301a-5p	peroxiredoxin-4-like	oxidation-reduction process,cell redox homeostasis,peroxidase activity,cellular oxidant detoxification,peroxiredoxin activity
PRDX1	GIYK01029079	Ssa#XM_014130705.1	ssa-miR-93a-5p,ssa-miR-106a-5p,ssa-miR-106b-5p,ssa-miR-17-5p,ssa-miR-20a-5p	peroxiredoxin-1-like	cell redox homeostasis,peroxiredoxin activity,oxidation-reduction process,cellular oxidant detoxification
PRC1	GIYK01026312,GIYK01026311	Ssa#XM_014126022.1,Ssa#XM_014126022.1	ssa-miR-205b-5p,ssa-miR-146b-5p,ssa-miR-146d-5p,ssa-miR-146a-5p,ssa-miR-8163-5p,ssa-miR-216c-3p	protein regulator of cytokinesis 1-like isoform X2	regulation of cytokinesis,microtubule binding,cytoskeleton,microtubule bundle formation
PRAG1	GIYK01034721	Ssa#XM_014138761.1	ssa-miR-218a-5p,ssa-miR-222a-5p,ssa-miR-203b-3p,ssa-miR-462b-5p,ssa-miR-19a-2-3p,ssa-miR-214-3-3p	tyrosine-protein kinase SgK223-like	protein kinase activity,ATP binding,protein phosphorylation
pqbp1	GIYK01033154	Ssa#NM_001146422.1	ssa-miR-214-1-2-3p	polyglutamine-binding protein 1	protein binding
pptc7	GIYK01048038,GIYK01048036	Ssa#XM_014160406.1,Ssa#XM_014160406.1	ssa-miR-15e-5p,ssa-miR-17-5p,ssa-miR-106a-5p,ssa-miR-106b-5p,ssa-miR-93a-5p,ssa-miR-146b-5p,ssa-miR-205b-5p,ssa-miR-novel-13-5p,ssa-miR-15d-5p,ssa-miR-novel-16-3p,ssa-miR-203b-3p,ssa-miR-146d-5p,ssa-miR-214-1-2-3p,ssa-miR-457ab-5p,ssa-miR-146a-5p,ssa-miR-8163-5p,ssa-miR-20a-5p,ssa-miR-214-3-3p	protein phosphatase PTC7 homolog	protein dephosphorylation,metal ion binding,phosphoprotein phosphatase activity
PPT1	GIYK01057877,GIYK01036593,GIYK01057876	Ssa#XM_014177571.1,Ssa#XM_014177571.1,Ssa#XM_014177571.1	ssa-miR-214-1-2-3p,ssa-miR-214-3-3p	Palmitoyl-protein thioesterase 1 precursor,palmitoyl-protein thioesterase 1-like	palmitoyl-(protein) hydrolase activity,protein depalmitoylation
ppp5c	GIYK01023060	Ssa#XM_014215447.1	ssa-miR-101b-3p,ssa-miR-15e-5p,ssa-miR-222b-3p,ssa-miR-101a-3p,ssa-miR-17-5p,ssa-miR-106a-5p,ssa-miR-106b-5p,ssa-miR-93a-5p,ssa-miR-novel-13-5p,ssa-miR-15d-5p,ssa-miR-221-3p,ssa-miR-216c-3p,ssa-miR-457ab-5p,ssa-miR-214-3-3p,ssa-miR-20a-5p,ssa-miR-122-2-3p	serine/threonine-protein phosphatase 5	protein dephosphorylation,protein binding,phosphoprotein phosphatase activity
ppp5c	GIYK01023059	Ssa#XM_014215447.1	ssa-miR-101b-3p,ssa-miR-15e-5p,ssa-miR-222b-3p,ssa-miR-101a-3p,ssa-miR-17-5p,ssa-miR-106a-5p,ssa-miR-106b-5p,ssa-miR-93a-5p,ssa-miR-15d-5p,ssa-miR-221-3p,ssa-miR-457ab-5p,ssa-miR-216c-3p,ssa-miR-20a-5p,ssa-miR-214-3-3p	serine/threonine-protein phosphatase 5	protein dephosphorylation,protein binding,phosphoprotein phosphatase activity
PPP3R1	GIYK01005454	Ssa#XM_014172791.1	ssa-miR-17-5p,ssa-miR-106a-5p,ssa-miR-106b-5p,ssa-miR-93a-5p,ssa-let-7e-5p,ssa-miR-20a-5p,ssa-miR-214-3-3p	calcineurin subunit B type 1	unfolded protein binding,protein dephosphorylation,cyclosporin A binding,calmodulin binding,protein domain specific binding,protein import into peroxisome matrix,nucleoplasm,Wnt signaling pathway calcium modulating pathway,postsynaptic modulation of chemical synaptic transmission,cytosol,parallel fiber to Purkinje cell synapse,glutamatergic synapse,branching involved in blood vessel morphogenesis…
PPP2R3A	GIYK01015988,GIYK01037840	Ssa#XM_014143986.1,Ssa#XM_014143986.1	ssa-miR-novel-16-5p,ssa-miR-novel-12-5p	serine/threonine-protein phosphatase 2A 56 kDa regulatory subunit alpha isoform-like	regulation of phosphoprotein phosphatase activity,protein phosphatase type 2A complex,signal transduction,protein phosphatase regulator activity
PPP2R3A	GIYK01050022,GIYK01050021,GIYK01050020,GIYK01050023	Ssa#XM_014163832.1,Ssa#XM_014163832.1,Ssa#XM_014163832.1,Ssa#XM_014163832.1	ssa-miR-551a-3p,ssa-miR-216c-3p,ssa-miR-214-1-2-3p,ssa-miR-206-3p	serine/threonine-protein phosphatase 2A regulatory subunit B'' subunit beta-like isoform X1,serine/threonine-protein phosphatase 2A regulatory subunit B'' subunit beta-like isoform X3	calcium ion binding
PPP2R3A	GIYK01001413	Ssa#XM_014202048.1	ssa-miR-101b-3p,ssa-miR-1-3p,ssa-miR-101a-3p,ssa-miR-222a-5p,ssa-miR-206-3p	Serine/threonine protein phosphatase 2A regulatory subunit
ppp2r2d	GIYK01063740	Ssa#XM_014216902.1	ssa-miR-222b-3p,ssa-miR-1-3p,ssa-miR-221-3p,ssa-miR-214-1-2-3p,ssa-miR-206-3p	serine/threonine-protein phosphatase 2A 55 kDa regulatory subunit B delta isoform isoform X3	regulation of phosphoprotein phosphatase activity,protein phosphatase type 2A complex,protein binding,protein phosphatase regulator activity
ppp2r2d	GIYK01063741	Ssa#XM_014216902.1	ssa-miR-222b-3p,ssa-miR-1-3p,ssa-miR-221-3p,ssa-miR-214-1-2-3p,ssa-miR-206-3p	serine/threonine-protein phosphatase 2A 55 kDa regulatory subunit B delta isoform	peptidyl-serine dephosphorylation,cytosol,myoblast fusion,regulation of phosphoprotein phosphatase activity,protein binding,protein phosphatase regulator activity,cell division,protein phosphatase type 2A complex,exit from mitosis
PPP2R2A	GIYK01048167,GIYK01048165	Ssa#XM_014160206.1,Ssa#XM_014160206.1	ssa-miR-15d-5p,ssa-miR-15e-5p,ssa-miR-novel-16-3p,ssa-miR-101a-3p	serine/threonine-protein phosphatase 2A 55 kDa regulatory subunit B alpha isoform	regulation of phosphoprotein phosphatase activity,protein phosphatase type 2A complex,protein binding,protein phosphatase regulator activity
PPP2R2A	GIYK01048166	Ssa#XM_014160206.1	ssa-miR-15d-5p,ssa-miR-15e-5p,ssa-miR-novel-16-3p,ssa-miR-101a-3p	serine/threonine-protein phosphatase 2A 55 kDa regulatory subunit B alpha isoform isoform X2	protein phosphatase type 2A complex,protein binding,protein phosphatase regulator activity
PPP2R2A	GIYK01048164	Ssa#XM_014160206.1	ssa-miR-15e-5p,ssa-miR-101a-3p,ssa-miR-17-5p,ssa-miR-106a-5p,ssa-miR-106b-5p,ssa-miR-93a-5p,ssa-miR-novel-16-3p,ssa-miR-15d-5p,ssa-miR-20a-5p	serine/threonine-protein phosphatase 2A 55 kDa regulatory subunit B alpha isoform	integral component of membrane,regulation of phosphoprotein phosphatase activity,protein binding,protein phosphatase regulator activity,protein phosphatase type 2A complex
PPP2R2A	GIYK01028021	Ssa#XM_014128578.1	ssa-miR-15e-5p,ssa-miR-218a-5p,ssa-miR-15d-5p,ssa-miR-457ab-5p,ssa-miR-214-3-3p	serine/threonine-protein phosphatase 2A 55 kDa regulatory subunit B alpha isoform-like	regulation of phosphoprotein phosphatase activity,protein binding,blood vessel lumenization,protein phosphatase regulator activity,protein phosphatase type 2A complex
ppp2cb	GIYK01056546	Ssa#XM_014174887.1	ssa-miR-18bc-5p	serine/threonine-protein phosphatase 2A catalytic subunit beta isoform	protein dephosphorylation,phosphoprotein phosphatase activity
PPP2CA	GIYK01011501,GIYK01011500,GIYK01033489	Ssa#XM_014197980.1,Ssa#XM_014197980.1,Ssa#XM_014136883.1	ssa-miR-218a-5p,ssa-miR-17-5p,ssa-miR-106a-5p,ssa-miR-106b-5p,ssa-miR-93a-5p,ssa-miR-18bc-5p,ssa-miR-216c-3p,ssa-miR-20a-5p	serine/threonine-protein phosphatase 2A catalytic subunit alpha isoform	protein dephosphorylation,phosphoprotein phosphatase activity
PPP2CA	GIYK01011849	Ssa#NM_001173609.1	ssa-miR-214-1-2-3p	serine/threonine-protein phosphatase 2A catalytic subunit alpha isoform-like	protein dephosphorylation,phosphoprotein phosphatase activity
PPP1R3G	GIYK01060156,GIYK01060157	Ssa#XM_014157571.1,Ssa#XM_014157571.1	ssa-miR-146b-5p,ssa-miR-203b-3p,ssa-miR-146d-5p,ssa-miR-novel-16-5p,ssa-miR-146a-5p,ssa-miR-301a-5p,ssa-miR-200b-3p	protein phosphatase 1 regulatory subunit 3G-like	protein binding
PPP1R3C	GIYK01059188,GIYK01059186,GIYK01046544,GIYK01059187,GIYK01046543	Ssa#XM_014179269.1,Ssa#XM_014179269.1,Ssa#XM_014158343.1,Ssa#XM_014179269.1,Ssa#XM_014158343.1	ssa-miR-15e-5p,ssa-miR-18bc-5p,ssa-miR-15d-5p,ssa-miR-203b-3p,ssa-miR-457ab-5p,ssa-miR-novel-16-3p,ssa-miR-200b-3p	protein phosphatase 1 regulatory subunit 3C-B-like isoform X2,protein phosphatase 1 regulatory subunit 3C-B-like	protein phosphatase binding,glycogen biosynthetic process
PPP1R3C	GIYK01044794	Ssa#XM_014154889.1	ssa-miR-novel-16-3p,ssa-miR-205b-5p,ssa-miR-18bc-5p	protein phosphatase 1 regulatory subunit 3C-B-like	protein binding,glycogen metabolic process
ppp1r3b	GIYK01002720,GIYK01002716,GIYK01002721,GIYK01002717,GIYK01002719,GIYK01002718	Ssa#XM_014129540.1,Ssa#XM_014129540.1,Ssa#XM_014129540.1,Ssa#XM_014129540.1,Ssa#XM_014129540.1,Ssa#XM_014129540.1	ssa-miR-15e-5p,ssa-miR-222a-5p,ssa-miR-15d-5p,ssa-miR-203b-3p,ssa-miR-457ab-5p	protein phosphatase 1 regulatory subunit 3B-like isoform X2	protein phosphatase type 1 complex,regulation of phosphoprotein phosphatase activity,protein binding,protein phosphatase regulator activity,regulation of glycogen catabolic process
PPP1R15B	GIYK01024976,GIYK01024975,GIYK01024974	Ssa#XM_014124699.1,Ssa#XM_014124699.1,Ssa#XM_014124699.1	ssa-miR-130a-2-3p	protein phosphatase 1 regulatory subunit 15B-like isoform X2
PPP1R13B	GIYK01000880,GIYK01000884,GIYK01000883,GIYK01000882,GIYK01000881	Ssa#XM_014192891.1,Ssa#XM_014192891.1,Ssa#XM_014192891.1,Ssa#XM_014192891.1,Ssa#XM_014192891.1	ssa-miR-214-3-3p	apoptosis-stimulating of p53 protein 1-like isoform X9,apoptosis-stimulating of p53 protein 1-like isoform X8	protein binding,signal transduction
ppp1r11	GIYK01058923	Ssa#XM_014199356.1	ssa-miR-15e-5p,ssa-miR-1-3p,ssa-miR-17-5p,ssa-miR-106a-5p,ssa-miR-106b-5p,ssa-miR-93a-5p,ssa-miR-15d-5p,ssa-miR-203b-3p,ssa-miR-462b-5p,ssa-miR-216c-3p,ssa-miR-457ab-5p,ssa-miR-206-3p,ssa-miR-214-3-3p,ssa-miR-20a-5p,ssa-miR-200b-3p	E3 ubiquitin-protein ligase PPP1R11	protein ubiquitination,ubiquitin-dependent protein catabolic process,nucleus,defense response to Gram-positive bacterium,protein serine/threonine phosphatase inhibitor activity,negative regulation of cytokine secretion,negative regulation of phosphoprotein phosphatase activity,protein phosphatase 1 binding,ubiquitin protein ligase activity
ppp1cb	GIYK01017320	Ssa#NM_001141688.1	ssa-miR-93a-5p,ssa-miR-106a-5p,ssa-miR-106b-5p,ssa-miR-17-5p,ssa-miR-20a-5p	serine/threonine-protein phosphatase PP1-beta catalytic subunit	protein dephosphorylation,metal ion binding,phosphoprotein phosphatase activity
PPP1CA	GIYK01009035,GIYK01009036,GIYK01014918,GIYK01009034,GIYK01014919	Ssa#XM_014203342.1,Ssa#XM_014193889.1,Ssa#XM_014203342.1,Ssa#XM_014203342.1,Ssa#XM_014203342.1	ssa-miR-101b-3p,ssa-let-7e-5p,ssa-miR-101a-3p,ssa-miR-214-1-2-3p	serine/threonine-protein phosphatase alpha-2 isoform-like	protein dephosphorylation,metal ion binding,cytoplasm,convergent extension,protein serine/threonine phosphatase activity,nucleus
PPM1D	GIYK01010612	Ssa#XM_014127181.1	ssa-miR-30a-1-2-5p,ssa-miR-15e-5p,ssa-miR-30a-3-4-5p,ssa-miR-205b-5p,ssa-miR-146b-5p,ssa-miR-15d-5p,ssa-miR-30e-5p,ssa-miR-457ab-5p,ssa-miR-462b-5p,ssa-miR-novel-12-5p,ssa-miR-216c-3p,ssa-miR-novel-16-3p,ssa-miR-200b-3p	protein phosphatase 1D-like isoform X2	protein dephosphorylation,protein serine/threonine phosphatase activity,metal ion binding
ppm1b	GIYK01001951,GIYK01001950,GIYK01001949	Ssa#XM_014210605.1,Ssa#XM_014210605.1,Ssa#XM_014210605.1	ssa-miR-18bc-5p,ssa-miR-214-1-2-3p,ssa-miR-novel-16-3p,ssa-miR-19a-2-3p,ssa-miR-214-3-3p	protein phosphatase 1B isoform X1	magnesium ion binding,protein serine/threonine phosphatase activity,manganese ion binding,protein dephosphorylation
PPIP5K2	GIYK01027242	Ssa#XM_014176437.1	ssa-miR-101b-3p,ssa-miR-15e-5p,ssa-miR-218a-5p,ssa-miR-101a-3p,ssa-miR-146b-5p,ssa-miR-18bc-5p,ssa-miR-15d-5p,ssa-miR-203b-3p,ssa-miR-146d-5p,ssa-miR-214-1-2-3p,ssa-miR-457ab-5p,ssa-miR-146a-5p	inositol hexakisphosphate and diphosphoinositol-pentakisphosphate kinase 2-like isoform X3	inositol heptakisphosphate kinase activity,cytosol,inositol hexakisphosphate 1-kinase activity,inositol hexakisphosphate 3-kinase activity,ATP binding,phosphorylation,inositol hexakisphosphate 5-kinase activity,diphosphoinositol-pentakisphosphate kinase activity,5-diphosphoinositol pentakisphosphate 3-kinase activity
PPIP5K1	GIYK01024929,GIYK01024930	Ssa#XM_014125394.1,Ssa#XM_014125394.1	ssa-miR-214-1-2-3p	inositol hexakisphosphate and diphosphoinositol-pentakisphosphate kinase 1-like isoform X11	inositol heptakisphosphate kinase activity,cytosol,inositol hexakisphosphate 1-kinase activity,inositol hexakisphosphate 3-kinase activity,ATP binding,phosphorylation,inositol hexakisphosphate 5-kinase activity,diphosphoinositol-pentakisphosphate kinase activity,5-diphosphoinositol pentakisphosphate 3-kinase activity
ppie	GIYK01019671	Ssa#NM_001141335.1	ssa-miR-214-3-3p	peptidyl-prolyl cis-trans isomerase E	protein folding,peptidyl-prolyl cis-trans isomerase activity,RNA binding,protein peptidyl-prolyl isomerization
PPID	GIYK01012233,GIYK01020615	Ssa#XM_014199227.1,Ssa#XM_014211901.1	ssa-miR-216c-3p,ssa-miR-205b-5p,ssa-miR-462b-5p	peptidyl-prolyl cis-trans isomerase D	protein folding,protein binding,peptidyl-prolyl cis-trans isomerase activity,protein peptidyl-prolyl isomerization
PPFIBP1	GIYK01025698,GIYK01025705,GIYK01025703,GIYK01025697,GIYK01025704,GIYK01025699,GIYK01025700,GIYK01025701	Ssa#XM_014125367.1,Ssa#XM_014125367.1,Ssa#XM_014125367.1,Ssa#XM_014125367.1,Ssa#XM_014125367.1,Ssa#XM_014125367.1,Ssa#XM_014125367.1,Ssa#XM_014125367.1	ssa-miR-101b-3p,ssa-miR-101a-3p	liprin-beta-1-like isoform X1,liprin-beta-1-like isoform X7	protein binding
PPDPFL	GIYK01031646	Ssa#XM_014147485.1	ssa-miR-222a-5p,ssa-miR-216c-3p,ssa-miR-18bc-5p	pancreatic progenitor cell differentiation and proliferation factor B-like
ppcs	GIYK01051406,GIYK01051408,GIYK01051407	Ssa#XM_014166271.1,Ssa#XM_014166271.1,Ssa#XM_014166271.1	ssa-miR-222a-5p,ssa-miR-18bc-5p,ssa-miR-462b-5p,ssa-miR-novel-12-5p,ssa-miR-216c-3p,ssa-miR-19a-2-3p,ssa-miR-214-3-3p	phosphopantothenate--cysteine ligase	phosphopantothenate--cysteine ligase activity
PPARG	GIYK01038759	Ssa#NM_001123546.1	ssa-miR-8163-3p	peroxisome proliferator-activated receptor gamma	sequence-specific DNA binding,intracellular receptor signaling pathway,zinc ion binding,steroid hormone mediated signaling pathway,cytoplasm,steroid hormone receptor activity,nucleus,nuclear receptor activity,rhythmic process,host cell nucleus,regulation of transcription DNA-templated
ppap2b	GIYK01024118,GIYK01024119	Ssa#XM_014122869.1,Ssa#XM_014122869.1	ssa-miR-221-3p,ssa-miR-222b-3p	phospholipid phosphatase 3 isoform X2,phospholipid phosphatase 3 isoform X1	integral component of membrane,phosphatidate phosphatase activity,dephosphorylation,regulation of Wnt signaling pathway,phospholipid metabolic process,lipid phosphatase activity
PPAN	GIYK01008592	Ssa#XM_014193166.1	ssa-miR-455-3p	suppressor of SWI4 1 homolog	integral component of membrane
PPA5	GIYK01060982	Ssa#XM_014181784.1	ssa-miR-8163-5p	tartrate-resistant acid phosphatase type 5-like	dephosphorylation,metal ion binding,acid phosphatase activity,response to mechanical stimulus
PPA5	GIYK01060983	Ssa#XM_014181784.1	ssa-miR-8163-5p	tartrate-resistant acid phosphatase type 5-like	hydrolase activity
POU2F1	GIYK01062587,GIYK01043113	Ssa#XM_014152395.1,Ssa#XM_014152395.1	ssa-miR-30a-1-2-5p,ssa-miR-222b-3p,ssa-miR-30a-3-4-5p,ssa-miR-221-3p,ssa-miR-30e-5p,ssa-miR-novel-16-3p	POU domain, class 2, transcription factor 1-like isoform X4,POU domain, class 2, transcription factor 1-like isoform X1	regulation of transcription by RNA polymerase II,sequence-specific DNA binding,DNA binding,DNA-binding transcription factor activity,DNA-binding transcription factor activity RNA polymerase II-specific,regulation of transcription DNA-templated,nucleus
POU2F1	GIYK01043114	Ssa#XM_014152395.1	ssa-miR-30a-1-2-5p,ssa-miR-222b-3p,ssa-miR-30a-3-4-5p,ssa-miR-221-3p,ssa-miR-30e-5p,ssa-miR-novel-16-3p	POU domain, class 2, transcription factor 1-like isoform X2	DNA-binding transcription factor activity,nucleus,sequence-specific DNA binding,regulation of transcription DNA-templated
POSTN	GIYK01011745,GIYK01011746	Ssa#XM_014198378.1,Ssa#XM_014198378.1	ssa-let-7b-3p,ssa-miR-142b-5p,ssa-miR-novel-2-5p,ssa-let-7j-3p	periostin isoform X1,periostin isoform X2
POLRMT	GIYK01023655	Ssa#XM_014169805.1	ssa-miR-203b-3p,ssa-miR-218a-5p	DNA-directed RNA polymerase, mitochondrial-like	DNA-directed 5'-3' RNA polymerase activity,DNA binding,protein binding,transcription DNA-templated
POLR3GL	GIYK01036931,GIYK01036932	Ssa#NM_001146508.1,Ssa#NM_001146508.1	ssa-miR-15d-5p,ssa-miR-457ab-5p	DNA-directed RNA polymerase III subunit RPC7-like isoform X1	DNA-directed 5'-3' RNA polymerase activity,RNA polymerase III complex,transcription by RNA polymerase III
POLR3GL	GIYK01013541	Ssa#NM_001139601.1	ssa-miR-214-1-2-3p	DNA-directed RNA polymerase III subunit RPC7-like isoform X1	DNA-directed 5'-3' RNA polymerase activity,RNA polymerase III complex,transcription by RNA polymerase III
POLR3GL	GIYK01058236	Ssa#XM_014177694.1	ssa-miR-15d-5p,ssa-miR-15e-5p,ssa-miR-457ab-5p,ssa-miR-214-1-2-3p	DNA-directed RNA polymerase III subunit RPC7-like isoform X1	DNA-directed 5'-3' RNA polymerase activity,RNA polymerase III complex,transcription by RNA polymerase III
POLR2G	GIYK01011807	Ssa#XM_014198581.1	ssa-miR-101a-3p	DNA-directed RNA polymerase II subunit RPB7	nuclear-transcribed mRNA catabolic process exonucleolytic,RNA polymerase II core complex,positive regulation of nuclear-transcribed mRNA poly(A) tail shortening,apoptotic process,regulation of gene silencing by miRNA,snRNA transcription by RNA polymerase II,single-stranded RNA binding,positive regulation of translational initiation,somatic stem cell population maintenance,transcription elongation…
POLR2E	GIYK01036010	Ssa#XM_014140834.1	ssa-miR-218a-5p,ssa-miR-novel-16-5p,ssa-miR-206-3p	DNA-directed RNA polymerases I, II, and III subunit RPABC1	DNA-directed 5'-3' RNA polymerase activity,RNA polymerase II core complex,transcription DNA-templated,RNA polymerase I complex,DNA binding,host cell nucleus,RNA polymerase III complex
POLR2A	GIYK01062448	Ssa#NM_001123692.1	ssa-miR-15e-5p,ssa-miR-novel-13-5p,ssa-miR-15d-5p,ssa-let-7e-5p,ssa-miR-457ab-5p,ssa-miR-214-1-2-3p	DNA-directed RNA polymerase II subunit RPB1-like
POLR1H	GIYK01058927	Ssa#NM_001140927.1	ssa-miR-218a-5p	DNA-directed RNA polymerase I subunit RPA12	DNA-directed 5'-3' RNA polymerase activity,transcription DNA-templated,nucleic acid binding,nucleolus,mRNA cleavage,zinc ion binding
POLR1C	GIYK01044545	Ssa#XM_014154532.1	ssa-miR-101b-3p,ssa-miR-101a-3p	DNA-directed RNA polymerases I and III subunit RPAC1	DNA-directed 5'-3' RNA polymerase activity,ribosome biogenesis,transcription DNA-templated,embryonic viscerocranium morphogenesis,cartilage development,DNA binding,protein dimerization activity
polr1b	GIYK01044253	Ssa#XM_014154234.1	ssa-miR-novel-13-5p	DNA-directed RNA polymerase I subunit RPA2	DNA-directed 5'-3' RNA polymerase activity,transcription DNA-templated,DNA binding,ribonucleoside binding,nucleus
poli	GIYK01055012	Ssa#XM_014172042.1	ssa-miR-15e-5p,ssa-miR-15d-5p,ssa-let-7e-5p,ssa-miR-457ab-5p,ssa-miR-214-1-2-3p,ssa-miR-novel-16-3p,ssa-miR-214-3-3p	DNA polymerase iota isoform X2	DNA repair
polg	GIYK01040455,GIYK01040454	Ssa#XM_014148273.1,Ssa#XM_014148273.1	ssa-miR-30a-1-2-5p,ssa-miR-101b-3p,ssa-miR-222b-3p,ssa-miR-101a-3p,ssa-miR-30a-3-4-5p,ssa-miR-146b-5p,ssa-miR-221-3p,ssa-let-7e-5p,ssa-miR-30e-5p,ssa-miR-551a-3p		DNA binding,gamma DNA polymerase complex,DNA replication
pole	GIYK01047817	Ssa#XM_014160794.1	ssa-miR-218a-5p,ssa-miR-novel-13-5p	DNA polymerase epsilon catalytic subunit A	DNA biosynthetic process,epsilon DNA polymerase complex,DNA replication,4 iron 4 sulfur cluster binding,DNA repair,DNA binding,DNA-directed DNA polymerase activity,nucleotide binding,zinc ion binding
[truncated: 2,803 more rows]
[truncated: 10 more columns]
