# Supplementary material for: Expression Analysis in Atlantic Salmon Liver Reveals miRNAs Associated with Smoltification and Seawater Adaptation
Source: Biology (Basel). 2022 Apr 30;11(5):688. doi: 10.3390/biology11050688 (PMC9138835; doi:10.3390/biology11050688)
Supplement: Supplementary file 1 [file biology-11-00688-s001.zip › Table S7. List gene symbols target genes.xlsx]

## Sheet: Sheet1
Table S7. List of unique gene symbols from predicted target genes of gDE-miRNAs. A total of 160 genes lacked gene symbols due to poor annotation as well as some genes were fish specific.
No.	Gene symbol (Human)
1	AATM
2	AATF
3	AARS1
4	AACS
5	ZYG11B
6	ZW10
7	zranb1
8	ZP3
9	ZNRF2
10	ZNHIT1
11	ZNF883
12	ZNF850
13	ZNF704
14	ZNF574
15	ZNF518A
16	ZNF473
17	znf423
18	ZNF407
19	ZNF395
20	ZNF367
21	ZNF346
22	ZNF330
23	znf277
24	ZNF23
25	ZMYM1
26	ZKSCAN7
27	ZKSCAN1
28	ZFYVE19
29	ZFYVE1
30	ZFPM1
31	ZFP91
32	ZFP69
33	ZFP36L2
34	ZFP36L1
35	ZFP36
36	ZFAND5
37	ZFAND2A
38	ZER1
39	ZDHHC7
40	ZDHHC2
41	zdhhc16
42	ZDBF2
43	ZCCHC8
44	Zc4h2
45	ZC3H3
46	ZBTB39
47	ZBTB3
48	ZBTB2
49	ZBTB16
50	YWHAZ
51	YIPF7
52	YIF1B
53	YIF1A
54	YES1
55	XPP1
56	XPOT
57	XPNPEP2
58	xpf
59	XPA
60	XK
61	XIRP2
62	WWP2
63	wrap73
64	wipi1
65	WFIKKN2
66	WDR82
67	WDR73
68	wdr60
69	wdr55
70	WDR45
71	WDR1
72	WDFY2
73	WASL
74	wars
75	WAPL
76	VWA7
77	VWA1
78	VTCN1
79	VPS52
80	VPS4B
81	VPS4A
82	vps45
83	VPS26C
84	VPS26B
85	vp37b
86	vp37a
87	VMP1
88	VGLL4
89	VEZF1
90	VEGFA
91	VDAC2
92	VDAC1
93	VCP
94	VCAM1
95	VATL
96	VATH
97	VATA
98	VAPB
99	VAMP8
100	vamp5
101	vamp2
102	va0e2
103	UTP4
104	utp20
105	utp15
106	USP6NL
107	USP6
108	USP47
109	USP39
110	USP22
111	usp16
112	USP14
113	usp1
114	UROD
115	UROC1
116	urb2
117	urad
118	UPP2
119	UPP1
120	UPK1A
121	UPF1
122	UNKL
123	unc119b
124	ULK2
125	UHRF1
126	UGT2A2
127	UGT1
128	UGP2
129	ufc1
130	UCP2
131	UCP1
132	uckl1
133	UCHL5
134	UBXN2A
135	UBTD1
136	ubr7
137	UBL3
138	UBIAD1
139	ube4b
140	ube2t
141	UBE2Q2
142	ube2n
143	UBE2L3
144	UBE2K
145	ube2g2
146	UBE2G1
147	ube2e3
148	UBE2D4
149	UBE2C
150	UBE2A
151	UBC9
152	UBA5
153	UAP1L1
154	TYRO3
155	TYMP
156	TXNRD1
157	txnl4a
158	TXNIP
159	TXNDC5
160	TXN
161	TUSC2
162	TULP3
163	TUFT1
164	tube1
165	TUBB4B
166	TUBA1C
167	TUBA1A
168	TTPA
169	TTK
170	TTC8
171	TTC5
172	TTC23
173	TTC13
174	TSR3
175	TSPYL1
176	TSPAN7
177	TSPAN31
178	TSPAN3
179	TSPAN13
180	tsn
181	TSKU
182	TSFM
183	TSC22D4
184	TSC22D2
185	TRUB1
186	TRPM5
187	TRPC3
188	TRMT2A
189	TRMT10A
190	triqk
191	TRIP12
192	TRIM39
193	TRIM35
194	TRIM34
195	TRIM25
196	TRIM23
197	TRIM16
198	TRIB2
199	tri13
200	trf
201	TRAPPC6B
202	trappc11
203	traf4
204	TRAF3IP2
205	TPX2
206	TPT1
207	TPST2
208	TPST1
209	TPR
210	tpm4
211	tpm2
212	TPM1
213	TPK1
214	TPI1
215	tpgs2
216	tpd52l1
217	tpcn2
218	TPC2L
219	TP53INP1
220	TP53BP1
221	TOP1MT
222	TOMM40
223	TOM1L2
224	TOB1
225	TNS2
226	TNS1
227	TNPO3
228	TNNI1
229	TNKS
230	TNFRSF19
231	TNFRSF11B
232	TNFAIP2
233	TNC
234	TMTC4
235	tmsb4x
236	TMPRSS9
237	TMPRSS2
238	tmod4
239	TMM70
240	TMEM91
241	TMEM9
242	TMEM86B
243	tmem63b
244	TMEM60
245	TMEM50A
246	TMEM38A
247	tmem37
248	TMEM272
249	TMEM263
250	TMEM258
251	TMEM183A
252	tmem181
253	TMEM176B
254	tmem170a
255	TMEM168
256	TMEM165
257	TMEM161A
258	TMEM158
259	tmem150c
260	TMEM14A
261	tmem138
262	TMEM109
263	TMEM107
264	TMEM106B
265	TMEM104
266	TMED7
267	TMED5
268	TMED4
269	TMBIM6
270	tma7
271	TM9SF2
272	TM7SF3
273	TM7SF2
274	TM6SF2
275	TM4SF4
276	TM127
277	TLE1
278	TKT
279	TJP3
280	Tinp1
281	TINAGL1
282	TIMM8B
283	TIMM50
284	TIMM17B
285	TIM23
286	TIM13
287	tifa
288	tiar
289	thyn1
290	THUM1
291	THOC5
292	THOC3
293	THOC1
294	them6
295	THEM5
296	THEM2
297	THBS4
298	thbs3
299	THBD
300	THADA
301	TGM2
302	tgfr2
303	TGFBR3
304	TFRC
305	TFPT
306	TFPI2
307	TFDP1
308	tfb2m
309	tf2l1
310	TEX264
311	TEX261
312	TENT4B
313	TEF
314	TECPR1
315	TDO2
316	TDG
317	TCTN3
318	TCTA
319	tcpd
320	TCP11
321	TCP1
322	TCN2
323	TCIM
324	TCHHL1
325	TCF12
326	TCAIM
327	TBXAS1
328	TBRG4
329	tbl1xr1
330	TBCE
331	TBC1D10A
332	TBB1
333	TAX1BP3
334	TAT
335	TARDBP
336	TARDBP
337	TAPBPL
338	TAP2
339	tap1
340	TANC2
341	Tamalin
342	TALDO
343	TAL1
344	tagln3
345	TAGL
346	taf6l
347	TAF12
348	TAF10
349	TADA3
350	TACR3
351	TACC3
352	SYTL4
353	SYS1
354	SYNGR2
355	SYNCRIP
356	syfb
357	syfa
358	sydc
359	syap1
360	SVIL
361	SUSD2
362	SUSD1
363	SURF4
364	suox
365	SUN1
366	SULT1A3
367	SUFU
368	stxbp3
369	stx10
370	stub1
371	STT3B
372	STT3A
373	strip2
374	STRADA
375	STON1
376	STMN1
377	stml2
378	stk6
379	STK38
380	stk35
381	STK26
382	STK17A
383	STK16
384	STIM2
385	STAU1
386	STAT5
387	stat4
388	STAT3
389	stat2
390	star5
391	STAM2
392	ST8SIA5
393	ST2B1
394	ST14
395	SSUH2
396	SSRB
397	SSBP3
398	SS18L2
399	SS18
400	srsf9
401	srsf7
402	SRSF2
403	SRRM2
404	SRRM1
405	srpx2
406	SRP14
407	srm
408	SQLE
409	SPY1
410	SPTBN1
411	SPSB4
412	spry4
413	spr
414	SPPL3
415	sppl2b
416	SPON2
417	SPIN1
418	sphm
419	SPF30
420	SPEN
421	spdl1
422	SPCS2
423	SPATA6
424	SPATA5L1
425	SPATA13
426	SPARC
427	SPAG5
428	SPACA4
429	SP2
430	SP140
431	SOX9
432	sox8
433	SOX11
434	SOWAHC
435	SOCS7
436	SOCS2
437	snx6
438	snx29
439	snx20
440	SNX16
441	snx14
442	SNX1
443	SNW1
444	SNU13
445	sntg1
446	SNTB2
447	SNRNP70
448	SNAP23
449	SMYD5
450	SMU1
451	SMPD1
452	smim15
453	SMIM12
454	smg7
455	SMG5
456	SMG1
457	smek2
458	SMC6
459	smc5
460	SMARCB1
461	SMAD4
462	SLMO2
463	SLK
464	sld5
465	SLCO1C1
466	SLC9A3R2
467	SLC7A6
468	SLC7A3
469	SLC7A11
470	SLC7A10
471	SLC6A6
472	Slc6a18
473	SLC6A13
474	SLC66A1
475	SLC5A6
476	SLC5A3
477	SLC52A3
478	slc52a2
479	SLC4A11
480	SLC48A1
481	slc46a3
482	SLC43A3
483	SLC39A8
484	SLC39A1
485	slc38a9
486	SLC38A7
487	slc38a6
488	SLC38A4
489	SLC38A2
490	SLC37A2
491	SLC37A1
492	SLC36A4
493	SLC36A1
494	SLC35G1
495	SLC35F5
496	SLC35E2A
497	SLC35D2
498	SLC35A4
499	SLC33A1
500	slc31a1
501	SLC30A4
502	SLC2A9
503	SLC2A13
504	SLC28A2
505	SLC27A6
506	SLC27A2
507	SLC25A48
508	SLC25A47
509	SLC25A44
510	SLC25A39
511	SLC25A38
512	SLC25A36
513	slc25a35
514	SLC25A34
515	SLC25A33
516	SLC25A3
517	SLC25A20
518	SLC25A16
519	SLC25A12
520	SLC25A1
521	SLC22A23
522	SLC22A13
523	SLC20A1
524	SLC1A5
525	SLC1A4
526	SLC1A3
527	SLC16A7
528	SLC16A5
529	SLC16A12
530	SLC16A10
531	slc16a1
532	slc15a4
533	slc12a8
534	SLC11A2
535	SLAMF9
536	skip
537	ski
538	skap2
539	ska1
540	SIRT7
541	SIPA1L2
542	sin3a
543	SIM2
544	SIL1
545	SIK2
546	SIGLEC16
547	SIGLEC14
548	SIGLEC11
549	SIGLEC1
550	SIDT2
551	SIAE
552	SHTN1
553	SHROOM3
554	SHROOM2
555	SHROOM1
556	shmt2
557	SHISA2
558	shcbp1
559	SHC2
560	SH3TC2
561	SH3RF3
562	SH3PXD2B
563	SH3D19
564	SH3BGRL3
565	SH3BGRL
566	SH2D3C
567	SH2D2A
568	SH2B3
569	SGTA
570	SGK3
571	SGK2
572	SFXN1
573	SFT2A
574	SFRP5
575	SFRP2
576	sfrp1
577	sf3b2
578	SETD3
579	setd1b
580	SET
581	sesn1
582	sertad3
583	SERTAD2
584	SERPINE1
585	serpind1
586	SERPINA1
587	serinc1
588	SERHL
589	SERB
590	SEPTIN7
591	SEPTIN6
592	SENP7
593	senp6
594	SEMA6D
595	SEMA6A
596	SEMA4G
597	SEMA4A
598	SEM1
599	sell
600	SELENOT
601	SELENOO
602	SELENON
603	SECISBP2
604	SEC62
605	SEC31A
606	SEC24C
607	sec23a
608	SEC22B
609	SEC14L1
610	sec13
611	SDHAF3
612	SDHAF2
613	sdha
614	SDF4
615	SDC2
616	SCYL1
617	scrn3
618	SCOC
619	SCO1
620	SCHIP1
621	SCD
622	SCCPDH
623	SCARB2
624	SCARB1
625	SCAMP1
626	SCAF11
627	SAT1
628	SASH1
629	SARS1
630	SAP3
631	SAMD9L
632	SAFB2
633	s39ad
634	s39ab
635	S35B4
636	s35b1
637	S26A2
638	S1PR4
639	S1PR3
640	S100P
641	RXRG
642	RXRB
643	ruvb1
644	rufy3
645	RTRAF
646	RTN3
647	RTN1
648	RTF2
649	rtca
650	RT36
651	RT33
652	RT31
653	RT23
654	RT16
655	RSL1D1
656	RS6
657	RS5
658	RS3
659	RS27
660	RS10
661	rrp9
662	RRP7A
663	RRP15
664	RRM1
665	rras2
666	rragc
667	rqcd1
668	RPSA
669	RPS6KB1
670	RPS28
671	rps23
672	RPS14
673	RPP38
674	RPP30
675	RPP25L
676	rpp14
677	RPN2
678	RPL5
679	rpe
680	RPC10
681	RORB
682	RORA
683	ROCK1
684	robo4
685	roa1
686	ROA0
687	rnh2c
688	rngtt
689	RNF25
690	RNF223
691	RNF213
692	RNF19B
693	rnf181
694	RNF170
695	RNF167
696	rnf166
697	RNF146
698	RNF13
699	RNF115
700	RNF11
701	RND3
702	RNASET2
703	RNASEK
704	RN185
705	rn121
706	RMI2
707	RMI1
708	RMDN2
709	RM27
710	RLF
711	RL26
712	RL14
713	RL13
714	RL10
715	RIPK4
716	RIPK3
717	RIOX1
718	riok3
719	RINT1
720	RIN2
721	RHOU
722	rhot2
723	rhoq
724	RHOG
725	rhof
726	RHOB
727	RHNO1
728	RHBDF2
729	RHBDF1
730	RHBDD3
731	rhbdd1
732	rhag
733	RGS3
734	RGN
735	RFXAP
736	RFNG
737	RFLNB
738	RFC4
739	RFA3
740	rfa1
741	REXO5
742	rexo4
743	REXO1
744	RETSAT
745	RELL1
746	REEP6
747	RECQL5
748	RDH14
749	RDH12
750	RD3L
751	rcor1
752	RCL1
753	rcc1
754	rcan2
755	rbp2
756	RBMS2
757	rbms1
758	RBM8A
759	RBM5
760	rbm41
761	rbm4
762	rbm39
763	RBM38
764	RBM25
765	RBM19
766	RBM12B
767	rbm12
768	RBCK1
769	RBBP4
770	RASSF8
771	RASGEF1B
772	RARRES2
773	RAPGEF6
774	RAPGEF5
775	RAPGEF3
776	rap2c
777	RAP2B
778	RAP2A
779	RAP1GAP2
780	RAP1GAP
781	RANGAP1
782	ranbp9
783	RANBP3L
784	RANBP1
785	RALGAPB
786	RAF1
787	RAD54L2
788	rad51
789	RAD23A
790	racgap1
791	RAC1
792	RABL6
793	RABIF
794	RABAC1
795	Rab7a
796	RAB5C
797	RAB5A
798	RAB4A
799	RAB38
800	RAB37
801	rab35
802	RAB33B
803	rab32
804	RAB1B
805	RAB1A
806	RAB14
807	QSOX1
808	QDPR
809	pyroxd2
810	PYCR1
811	pwwp2b
812	pwp2
813	pus7
814	pura2
815	pum2
816	PUDP
817	PTTG1IP
818	PTTG1
819	PTRH1
820	ptrf
821	PTPRU
822	PTPRN2
823	ptprg
824	PTPN3
825	ptpmt1
826	PTP4A2
827	PTN6
828	PTMA
829	PTK7
830	PTK2
831	PTGIS
832	PTGFRN
833	PTGES3
834	PTGDS
835	PTDSS1
836	PTCD1
837	ptbp2
838	PTBP1
839	PTAFR
840	PSTPIP1
841	PSMG1
842	psme3
843	PSME1
844	psmd8
845	PSMD3
846	PSMD11
847	PSMC3
848	PSMC2
849	PSMB9
850	psl2
851	PSIP1
852	PSD4
853	PSB8
854	PSB7
855	PSAT1
856	PSAP
857	PSA6
858	PSA1
859	PRSS23
860	PRSS16
861	prrc1
862	PRR15L
863	prr13
864	PRPF8
865	PRPF40A
866	prp19
867	PCDH18
868	PROF2
869	prodh2
870	PRODH
871	PRMT5
872	prmt3
873	PRKRA
874	PRKD3
875	PRG4
876	PRF1
877	PREPL
878	PRDX6
879	PRDX4
880	PRDX1
881	PRC1
882	PRAG1
883	pqbp1
884	pptc7
885	PPT1
886	ppp5c
887	PPP3R1
888	PPP2R3A
889	ppp2r2d
890	PPP2R2A
891	ppp2cb
892	PPP2CA
893	PPP1R3G
894	PPP1R3C
895	ppp1r3b
896	PPP1R15B
897	PPP1R13B
898	ppp1r11
899	ppp1cb
900	PPP1CA
901	PPM1D
902	ppm1b
903	PPIP5K2
904	PPIP5K1
905	ppie
906	PPID
907	PPFIBP1
908	PPDPFL
909	ppcs
910	PPARG
911	ppap2b
912	PPAN
913	PPA5
914	POU2F1
915	POSTN
916	POLRMT
917	POLR3GL
918	POLR2G
919	POLR2E
920	POLR2A
921	POLR1H
922	POLR1C
923	polr1b
924	poli
925	polg
926	pole
927	pola2
928	PODXL
929	pnpt1
930	PNPLA7
931	PNPLA2
932	PNP
933	PNO1
934	pmpcb
935	PMP22
936	PMM1
937	pmepa1
938	PLAA
939	PLPP5
940	plpp
941	PLPBP
942	PLK3
943	plk2
944	PLIN2
945	PLG
946	PLEKHO1
947	PLEKHM2
948	PLEKHM1
949	PLEKHA7
950	PLEKHA2
951	PLEC
952	PLD4
953	pld1
954	PLCXD1
955	plcb4
956	PLAUR
957	PLA2G4A
958	PLA2G12A
959	PKP1
960	PKN2
961	PKM
962	PKIB
963	pkhb2
964	PKD2
965	pja2
966	PITRM1
967	pithd1
968	pisd
969	pir
970	pipox
971	PIP5K1B
972	PIP5K1A
973	PIM1
974	PIK3R1
975	PIK3CG
976	PIK3CB
977	PIGM
978	pigb
979	PIGA
980	PIEZO1
981	pid1
982	PICALM
983	PIAS4
984	PHYHD1
985	PHTF2
986	PHTF1
987	PHPT1
988	PHKG1
989	PHKA2
990	PHKA1
991	PHGDH
992	PHF5A
993	PHF20
994	PHF19
995	PHF14
996	PHC1
997	phb2
998	PGPEP1
999	pgm3
1000	pgm2l1
1001	PGLYRP2
1002	PGDH
1003	PGBD4
1004	pgap3
1005	PGAM5
1006	pfkfb3
1007	PFD4
1008	PEX19
1009	PET100
1010	perp
1011	PER1
1012	PEN2
1013	pelo
1014	PELI1
1015	PECA1
1016	pea15
1017	PDXK
1018	PDPK1
1019	PDK3
1020	PDK2
1021	PDIA4
1022	pdgfrl
1023	PDE9A
1024	PDCL3
1025	PDCD7
1026	PDCD6
1027	PDCD5
1028	PDCD4
1029	PCYT1B
1030	PCYT1A
1031	PCSK7
1032	PCSK6
1033	pcsk5
1034	PCNX4
1035	PCNA
1036	PCMTD2
1037	pcmd1
1038	PCM1
1039	pck2
1040	pck1
1041	PCGF3
1042	pcf11
1043	PCDHGC5
1044	PCDHGA12
1045	PCBP2
1046	PAWR
1047	PARVA
1048	PARP12
1049	PARK7
1050	PARD6A
1051	paqrb
1052	PAPOLG
1053	papola
1054	PANK1
1055	pam
1056	PALM3
1057	PALLD
1058	PAK2
1059	PAK1
1060	PAIP2
1061	pai2b
1062	PACSIN2
1063	PABPN1L
1064	PABPN1
1065	PABPC1
1066	PA1B3
1067	P53
1068	P4HA2
1069	P3IP1
1070	p3
1071	P2RY10
1072	P2RY1
1073	p22phox
1074	oxnad1
1075	OXCT1
1076	OSBPL3
1077	OSBP2
1078	OSBP
1079	orc5
1080	orai2
1081	orai1
1082	OLAH
1083	OGN
1084	OGFRL1
1085	OGFR
1086	OGDH
1087	ODF3
1088	odc1
1089	OCM
1090	NAA50
1091	NAA35
1092	naa15
1093	NAA10
1094	NXT2
1095	NXNL2
1096	NXN
1097	NUTF2
1098	NUPR2
1099	NUPR1
1100	NUP98
1101	NUP43
1102	nup160
1103	nup153
1104	nup107
1105	NUGGC
1106	NUFIP2
1107	NUDT3
1108	NUDT22
1109	NUDT20
1110	NUDT11
1111	NUDCD1
1112	NUCB2
1113	nt5dc2
1114	NT5C3B
1115	NT5C3A
1116	nsun6
1117	nsun5
1118	NSUN3
1119	NSUN2
1120	NSE1
1121	NSDHL
1122	NRP1
1123	NRK2
1124	NRIP1
1125	NRF1
1126	NR5A2
1127	NR4A1
1128	NR2F6
1129	NR1H4
1130	NR1H3
1131	NR1D2
1132	NR1D1
1133	NR0B2
1134	NPTX1
1135	NPR2
1136	NPNT
1137	NPM1
1138	NPL
1139	npepl1
1140	NPC1
1141	NPAT
1142	NP1L1
1143	NOXO1
1144	NOP53
1145	nol5
1146	NOCT
1147	NNT
1148	NMT1
1149	nmnat1
1150	NME5
1151	nmd3
1152	nlrx1
1153	NLRP3
1154	NLRP12
1155	NLRC3
1156	NLK
1157	NKL
1158	NKD2
1159	NIPSNAP3A
1160	NIPBL
1161	NIPA2
1162	NINL
1163	NIFK
1164	NIBAN1
1165	nhsl1
1166	NFYC
1167	NFX1
1168	NFKBIA
1169	NFKB2
1170	NFKB1
1171	NFIP1
1172	NFIL3
1173	NFE2L1
1174	NF2
1175	NEU3
1176	neu1
1177	NEK2
1178	NEGR1
1179	NEDD8
1180	NEDD4L
1181	NECTIN4
1182	NDUFS8
1183	NDUFS1
1184	NDUFAF6
1185	NDUB9
1186	NDST2
1187	NDRG3
1188	NDRG1
1189	ndnf
1190	NCOR1
1191	NCOA7
1192	NCOA4
1193	NCOA3
1194	NCL
1195	nckipsd
1196	NCKAP1
1197	NCF4
1198	NCF2
1199	NCBP3
1200	NCAPH
1201	cnd3
1202	NBR1
1203	NBN
1204	nbl1
1205	NAT10
1206	NASP
1207	NARS1
1208	NARF
1209	NAPG
1210	NAPEPLD
1211	NAIF1
1212	NADK
1213	NACA
1214	NAB2
1215	N6AMT1
1216	MYOZ2
1217	myo3a
1218	MYLK
1219	MYLIP
1220	MYH9
1221	MYH3
1222	MYCBP
1223	MYC
1224	MYADM
1225	MXRA8
1226	MXRA5
1227	MX1
1228	mvp
1229	MVK
1230	MVD
1231	MVB12A
1232	MUSTN1
1233	mtss1
1234	MTREX
1235	MTO1
1236	mthfd1l
1237	mthfd1
1238	mterf2
1239	MTDC
1240	MT1B
1241	msto1
1242	MST1
1243	MSRB1
1244	msi2h
1245	msh6
1246	msh2
1247	MS4A4A
1248	MRPS24
1249	MRPS18A
1250	MRPS15
1251	MRPS12
1252	mrpl23
1253	MROH1
1254	MRM3
1255	MRM2
1256	MRE11
1257	mrc1
1258	MR1
1259	MPV17L2
1260	MPST
1261	MPRD
1262	mpp1
1263	MPHOSPH9
1264	mphosph6
1265	MPC2
1266	mp2k2
1267	mospd1
1268	MORN4
1269	morg1
1270	morf4l1
1271	MORC3
1272	MON1B
1273	MOGS
1274	MOCOS
1275	MOB1B
1276	MMS19
1277	mmp23b
1278	mmp2
1279	MMP19
1280	MMP11
1281	MLYCD
1282	MLKL
1283	mlf2
1284	mkrn2
1285	MKNK2
1286	MISP
1287	mis18bp1
1288	miox
1289	MIOS
1290	MINPP1
1291	MIER1
1292	MID1IP1
1293	MICOS13
1294	MICAL3
1295	MIB2
1296	MIA2
1297	MGP
1298	mgll
1299	MGDP1
1300	MGAT5
1301	mfsd8
1302	MFSD2A
1303	MFSD14A
1304	mfsd1
1305	MFRP
1306	mfn2
1307	MFHAS1
1308	MFF
1309	MFAP3L
1310	METTL15
1311	METTL1
1312	METK2
1313	METAP2
1314	METAP1
1315	MET
1316	MERTK
1317	mep50
1318	MEP1B
1319	memo1
1320	MEGF9
1321	MEGF6
1322	MEF2D
1323	MED26
1324	med23
1325	MED16
1326	MED15
1327	MED14
1328	MED1
1329	MECR
1330	mdn1
1331	MDHC
1332	mcu
1333	mcoln2
1334	MCOLN1
1335	MCOLN1
1336	MCM6
1337	MCM4
1338	MCM7
1339	CCNL1
1340	MCCC1
1341	MBLAC2
1342	MBL2
1343	mbd3
1344	MATR3
1345	masp2
1346	mars
1347	marh5
1348	MARH2
1349	MARCKSL1
1350	MARCKS
1351	MAPT
1352	mapre2
1353	MAPK9
1354	mapk3
1355	map3k7
1356	MAP3K5
1357	MAP3K3
1358	MAP3K21
1359	MAP3K2
1360	MAP3K19
1361	MAP3K11
1362	map1lc3b
1363	MANF
1364	MANEA
1365	MAN1B1
1366	MAN1A1
1367	MALT1
1368	MAIP1
1369	MAF
1370	MADD
1371	MACC1
1372	LZTR1
1373	LZTFL1
1374	LZIC
1375	LYSMD3
1376	lyric
1377	lyox
1378	LYG2
1379	LYG1
1380	ly75
1381	LTBP1
1382	LSM1
1383	LRRN4CL
1384	LRCH4
1385	LRRC59
1386	LRRC58
1387	LRRC56
1388	LRRC43
1389	lrrc42
1390	LRRC3B
1391	LRRC20
1392	LRRC19
1393	LRRC18
1394	LRRC15
1395	LRRC14B
1396	LRP5L
1397	LRC47
1398	LPP1
1399	LPL
1400	LPIN1
1401	LPCAT2
1402	LPAR6
1403	lonrf3
1404	LONRF2
1405	lonp1
1406	lnx1
1407	lnpep
1408	LMNB2
1409	LMAN2
1410	LITAF
1411	LIPG
1412	LIPA
1413	LIN37
1414	LIMS1
1415	LIMK2
1416	LIMA1
1417	LHX6
1418	LGR4
1419	LGI1
1420	LGALS9
1421	LGALS3
1422	lg3bp
1423	LFNG
1424	lepr
1425	LEG1
1426	LECT2
1427	LEAP2
1428	LDLRAP1
1429	LDLR
1430	ldhd
1431	LDHB
1432	lcmt1
1433	LCAT
1434	LBR
1435	las1l
1436	LARS1
1437	LAPTM4B
1438	lap2
1439	LANCL1
1440	lamtor2
1441	lamtor1
1442	lama2
1443	LACTB
1444	l3hypdh
1445	L1CAM
1446	KYNU
1447	KSR1
1448	KRT13
1449	krit1
1450	KPNB1
1451	KPNA2
1452	KMO
1453	KLHL24
1454	KLHL20
1455	KLHL12
1456	KLHL11
1457	KLF9
1458	KLF6
1459	KLF11
1460	klc1
1461	kl
1462	kiaa1147
1463	KIAA1143
1464	kiaa0513
1465	KIFC3
1466	KIFC1
1467	KIF5B
1468	KIF4A
1469	KIF2C
1470	KIF2A
1471	KIF20B
1472	KIF20A
1473	KIF14
1474	KIDINS220
1475	ki67
1476	KHDRBS1
1477	kdm8
1478	KDM6B
1479	KDM6A
1480	KDM5B
1481	KDM4B
1482	KDF1
1483	KDELR3
1484	KDELR2
1485	KCTD9
1486	KCRB
1487	kcp
1488	KCNS3
1489	KCNQ5
1490	KCNG2
1491	KCMF1
1492	KCC2D
1493	KATNBL1
1494	KATNB1
1495	KAT7
1496	KAT6A
1497	KAT2B
1498	KARS1
1499	KANSL3
1500	JUND
1501	JUNB
1502	JUN
1503	jos2
1504	JKAMP
1505	JARID2
1506	JAK2
1507	IWS1
1508	IVNS1ABP
1509	IVL
1510	IVD
1511	ITM2B
1512	ITIH3
1513	itih2
1514	ITGB5
1515	ITGB3
1516	ITGB3
1517	ITGB1BP1
1518	ITGB1
1519	ITGAM
1520	ITGAL
1521	itfg1
1522	irx2a
1523	IRS2
1524	IRF8
1525	IRF7
1526	irf6
1527	IRF2BP2
1528	IRF1
1529	iqgap1
1530	IPYR2
1531	IPO7
1532	ipo5
1533	IP6K2
1534	ints2
1535	INTS12
1536	INTS1
1537	insig1
1538	INPP5D
1539	INPP5B
1540	INPP1
1541	ino80e
1542	INHBB
1543	ING3
1544	INF2
1545	IN35
1546	IMMP2L
1547	ILRUN
1548	ILK
1549	ILF3
1550	ILF2
1551	il6ra
1552	IL4I1
1553	IL22RA2
1554	IL1RAP
1555	IL18R1
1556	IL17RC
1557	IL15RA
1558	IL13RA2
1559	IL12RB2
1560	IKZF4
1561	ikbkb
1562	IKBIP
1563	IGSF6
1564	IGSF3
1565	IGSF10
1566	IGLV3-21
1567	IGHD
1568	IGFBP1
1569	IGF2R
1570	IGF2
1571	igf1
1572	IGBP1
1573	ift88
1574	ift27
1575	ift20
1576	ift172
1577	ifrd1
1578	IFNGR1
1579	IFNAR1
1580	IFI44L
1581	IFI30
1582	IF5A1
1583	IF5
1584	IF4E
1585	if2a
1586	idi1
1587	IDH1
1588	idd
1589	ID3
1590	ID2
1591	ID1
1592	ICOSLG
1593	ICAM2
1594	ICAM1
1595	iah1
1596	HYOU1
1597	HTRA1
1598	HSPA9
1599	HSPA8
1600	HSPA4
1601	HSP90AA1
1602	HSP47
1603	hsf1
1604	HSD3B7
1605	HSD17B2
1606	HSD17B12
1607	hs90b
1608	HS6ST1
1609	HS3ST6
1610	HS3ST3B1
1611	HS3ST1
1612	HS2ST1
1613	HPX
1614	HPS5
1615	HPN
1616	HP
1617	HOP2
1618	HOMEZ
1619	hnrpg
1620	HNRNPUL2
1621	hnrnpul1
1622	HNRNPR
1623	HNRNPLL
1624	HNRNPK
1625	HNRNPH1
1626	HNRNPDL
1627	HNRNPAB
1628	HNF1B
1629	HN1L
1630	hmox2
1631	HMOX1
1632	hmmr
1633	HMGN1
1634	hmgcr
1635	HMGCL
1636	HMCN1
1637	HKDC1
1638	hirip3
1639	HIG2A
1640	HIG1A
1641	HID1
1642	HHEX
1643	hgs
1644	HGFAC
1645	HG2A
1646	HEXIM1
1647	HEXD
1648	HERPUD2
1649	HERPUD1
1650	HERC3
1651	HEPACAM
1652	HEMGN
1653	HEM4
1654	HEM3
1655	HELZ2
1656	HEL-S-89n
1657	HELLS
1658	hectd2
1659	HECTD1
1660	HEBP2
1661	HEBP1
1662	HEATR1
1663	HDAC8
1664	HCCS
1665	hbs1l
1666	hbp1
1667	HBB
1668	HAUS8
1669	HAT1
1670	HARS1
1671	HAPLN3
1672	hapln1
1673	HAGH
1674	HADH
1675	hacl1
1676	HACD2
1677	H6PD
1678	H2AZ2
1679	H2AZ1
1680	H1X
1681	H10
1682	GAA
1683	GXYLT2
1684	GVINP1
1685	GULP1
1686	gtse1
1687	gtpbp2
1688	GTF2H2
1689	GSTP1
1690	gsto1
1691	GSTA3
1692	GSTA1
1693	gsr
1694	GSN
1695	GSK3B
1696	GSH0
1697	grsf1
1698	GRPE1
1699	GRK5
1700	GREB1L
1701	GRB7
1702	GRB14
1703	GRB10
1704	gramd4
1705	GRAMD2B
1706	GRAMD1C
1707	GPX3
1708	GPSM1
1709	GPS2
1710	GPRC5C
1711	GPR18
1712	GPR155
1713	GPR148
1714	GPR137B
1715	GPI
1716	GPD1
1717	GPCPD1
1718	GPC4
1719	GPC1
1720	GPBP1
1721	GPAT3
1722	GOT1B
1723	got1
1724	GORASP2
1725	GOLPH3
1726	GOLGA3
1727	GNPNAT1
1728	gnpat
1729	gnmt
1730	GNL3
1731	GNL1
1732	gng10
1733	GNE
1734	gnb2l1
1735	GNAQ
1736	gnai3
1737	GNAI2
1738	GNAI1
1739	GNA14
1740	GMPPA
1741	gmnn
1742	GMCL1
1743	GLYG
1744	GLUL
1745	GLUD1
1746	glu2b
1747	gltp
1748	GLS
1749	glpk3
1750	GLOD4
1751	GLO1
1752	GLDC
1753	gla
1754	GK5
1755	GJC1
1756	GIPC2
1757	gins3
1758	GINS1
1759	GIMAP8
1760	GIMAP7
1761	GIMAP4
1762	GHR
1763	GHDC
1764	GGH
1765	GGCX
1766	GGA3
1767	GGA2
1768	GGA1
1769	GFRP
1770	GFRA4
1771	GFRA1
1772	GFM1
1773	gemin6
1774	GEMIN2
1775	GCSH
1776	GCK
1777	GCH1
1778	GCDH
1779	GCC1
1780	GBGT1
1781	GBG12
1782	GATD1
1783	GATAD2A
1784	GATA6
1785	GAS8
1786	GAN
1787	GALNT8
1788	GALNT7
1789	GALNT2
1790	GALNT18
1791	GALNT11
1792	GALNT10
1793	GADD45G
1794	GADD45B
1795	GADD45A
1796	G6PD
1797	G6PC
1798	G3BP2
1799	G3BP1
1800	g137a
1801	FAAH2
1802	FZD9
1803	FZD6
1804	fzd5
1805	FZD10
1806	FXYD1
1807	fus
1808	FURIN
1809	FUNDC1
1810	FTH1
1811	FSTL1
1812	FRZB
1813	FPR1
1814	FPPS
1815	FPGS
1816	FOXO3
1817	foxn3
1818	FOXM1
1819	FOXL1
1820	FOXK2
1821	FOXA2
1822	FOSL2
1823	FNTB
1824	FNTA
1825	FN3KRP
1826	FN1
1827	FMO5
1828	FMNL3
1829	FMC1
1830	FLOT2
1831	FLNB
1832	fli1
1833	fkbp5
1834	FKBP2
1835	fkbp1b
1836	FKBP10
1837	FKB1A
1838	FITM2
1839	fibin
1840	FHL1
1841	FGL2
1842	FGL1
1843	FGGY
1844	FGG
1845	FGB
1846	FGA
1847	FES
1848	FEL
1849	fdft1
1850	FCRL5
1851	fbxw5
1852	fbxw12
1853	FBXO45
1854	fbxo42
1855	fbxo4
1856	fbxl6
1857	FBXL20
1858	FBXL19
1859	FBXL14
1860	fbrl
1861	FBP1
1862	FASN
1863	farp2
1864	FARP1
1865	fancc
1866	FAM8A1
1867	fam65b
1868	FAM53C
1869	fam53b
1870	fam3a
1871	FAM204A
1872	FAM199X
1873	FAM171A2
1874	FAM168B
1875	fam160b2
1876	FAM149B1
1877	FAM13A
1878	fam133b
1879	FAM126A
1880	FAHD2A
1881	FAHD1
1882	fah
1883	FADS6
1884	FADS2
1885	FADD
1886	FABP4
1887	F9
1888	F7
1889	F2R
1890	F264
1891	F13A1
1892	EZH1
1893	EYA3
1894	EXT1
1895	EXOSC9
1896	EXOSC4
1897	EXOC6
1898	EXOC5
1899	EXOC3L1
1900	EVPLL
1901	EVA1B
1902	ets2
1903	ETS1
1904	ETNPPL
1905	ETNK1
1906	ETHE1
1907	etfrf1
1908	ETFDH
1909	ETFA
1910	etf1
1911	ESYT2
1912	ESYT1
1913	ESR2
1914	esf1
1915	esco2
1916	errfi
1917	ERP44
1918	ermp1
1919	ERH
1920	erg
1921	ERF
1922	eps8l2
1923	EPS8L1
1924	EPRS1
1925	epn1
1926	epm2a
1927	EPHX2
1928	EPHB2
1929	EPDR1
1930	epcam
1931	EPB41L1
1932	enpp6
1933	ENOPH1
1934	ENO1
1935	ENKD1
1936	ENDOU
1937	endog
1938	ENC1
1939	EML3
1940	emg1
1941	eme1
1942	EMC9
1943	EMC8
1944	EMC6
1945	EMC4
1946	ELP1
1947	ELOVL6
1948	ELOVL4
1949	ELOVL1
1950	ELOF1
1951	ELF2
1952	ELF1
1953	ELAVL1
1954	ELAC2
1955	EIF6
1956	EIF4G3
1957	EIF4G2
1958	EIF4G1
1959	EIF4EBP3
1960	eif4ebp2
1961	eif4e2
1962	eif4a2
1963	EIF4A1
1964	EIF3M
1965	EIF3L
1966	EIF3J
1967	eif2s3
1968	EIF2AK2
1969	EIF2AK1
1970	EIF1B
1971	EI24
1972	EHMT2
1973	ehd3
1974	EHD1
1975	egln2
1976	EFNA1
1977	efcab7
1978	ef2
1979	EF1D
1980	ef1b
1981	EF1A2
1982	EEF1E1
1983	EEF1A1
1984	EED
1985	EDF1
1986	EDEM3
1987	EDEM1
1988	ect2
1989	ECM1
1990	ECI2
1991	ECHDC2
1992	ECE2
1993	ECE1
1994	ebp2
1995	EARS2
1996	E2F8
1997	DYRK2
1998	dynlt3
[truncated: 646 more rows]
