# Supplementary material for: Expression Analysis in Atlantic Salmon Liver Reveals miRNAs Associated with Smoltification and Seawater Adaptation
Source: Biology (Basel). 2022 Apr 30;11(5):688. doi: 10.3390/biology11050688 (PMC9138835; doi:10.3390/biology11050688)
Supplement: Supplementary file 1 [file biology-11-00688-s001.zip › Table S8. Enriched GO biological processes.xlsx]

## Sheet: Sheet1
Table S8. List of enriched biological process of all target genes with fold enrichment greater than 2. The enriched biological processes were sorted heirarchically by default.
GO enrichment analysis (biological process)1	number of genes in the reference list (Homo sapiens)2	number of genes in uploaded list3	expected value4	fold Enrichment5	over/under representation category6	raw P-value7	Benjamini-Hochberg (FDR)8
flavonoid glucuronidation	9	9	1.18	7.6	+	6.98e-05	0.00271
cellular glucuronidation	19	10	2.5	4	+	0.0011	0.0264
glucuronate metabolic process	21	10	2.76	3.62	+	0.00196	0.0413
uronic acid metabolic process	21	10	2.76	3.62	+	0.00196	0.0414
monocarboxylic acid metabolic process	497	130	65.42	1.99	+	4.53e-11	5.87e-09
carboxylic acid metabolic process	812	211	106.88	1.97	+	3.39e-17	9.83e-15
oxoacid metabolic process	836	220	110.04	2	+	1.98e-18	7.21e-16
organic acid metabolic process	858	229	112.93	2.03	+	7.04e-20	3.06e-17
cellular metabolic process	7094	1399	933.74	1.5	+	7.69e-66	3.01e-62
small molecule metabolic process	1566	394	206.12	1.91	+	1.01e-29	1.44e-26
flavonoid metabolic process	15	11	1.97	5.57	+	7.5e-05	0.00287
negative regulation of cellular glucuronidation	8	8	1.05	7.6	+	0.00018	0.00611
negative regulation of cellular carbohydrate metabolic process	51	21	6.71	3.13	+	4.64e-05	0.00192
regulation of cellular carbohydrate metabolic process	154	53	20.27	2.61	+	2.17e-08	1.84e-06
regulation of carbohydrate metabolic process	187	60	24.61	2.44	+	2.11e-08	1.81e-06
negative regulation of carbohydrate metabolic process	57	24	7.5	3.2	+	1.02e-05	0.000511
negative regulation of small molecule metabolic process	99	36	13.03	2.76	+	1.26e-06	7.74e-05
regulation of small molecule metabolic process	348	99	45.81	2.16	+	2.02e-10	2.3e-08
regulation of cellular glucuronidation	9	8	1.18	6.75	+	0.000305	0.00942
regulation of cellular ketone metabolic process	146	48	19.22	2.5	+	3.73e-07	2.58e-05
negative regulation of glucuronosyltransferase activity	8	8	1.05	7.6	+	0.00018	0.0061
negative regulation of transferase activity	272	80	35.8	2.23	+	3.89e-09	3.74e-07
negative regulation of catalytic activity	770	153	101.35	1.51	+	4.87e-06	0.000263
negative regulation of molecular function	1135	231	149.39	1.55	+	2.81e-09	2.81e-07
regulation of transferase activity	887	210	116.75	1.8	+	1.4e-13	2.77e-11
regulation of glucuronosyltransferase activity	8	8	1.05	7.6	+	0.00018	0.00608
xenobiotic glucuronidation	11	9	1.45	6.22	+	0.000194	0.00645
response to xenobiotic stimulus	408	94	53.7	1.75	+	2.87e-06	0.000162
dicarboxylic acid biosynthetic process	13	10	1.71	5.84	+	0.000121	0.00435
dicarboxylic acid metabolic process	90	35	11.85	2.95	+	6.69e-07	4.46e-05
carboxylic acid biosynthetic process	262	64	34.49	1.86	+	2.51e-05	0.00111
organic acid biosynthetic process	264	65	34.75	1.87	+	1.82e-05	0.000838
cellular biosynthetic process	2318	487	305.1	1.6	+	1.07e-21	6.01e-19
biosynthetic process	2453	523	322.87	1.62	+	1.08e-24	9.43e-22
organic substance biosynthetic process	2387	511	314.19	1.63	+	1.66e-24	1.37e-21
small molecule biosynthetic process	425	119	55.94	2.13	+	6.46e-12	9.82e-10
mitotic DNA replication	12	9	1.58	5.7	+	0.000304	0.00943
nuclear DNA replication	24	12	3.16	3.8	+	0.00051	0.0142
cell cycle DNA replication	25	12	3.29	3.65	+	0.000676	0.018
cell cycle process	808	184	106.35	1.73	+	9.43e-11	1.13e-08
cell cycle	1208	262	159	1.65	+	6.53e-13	1.14e-10
DNA-dependent DNA replication	148	36	19.48	1.85	+	0.00166	0.0366
DNA replication	215	56	28.3	1.98	+	2.16e-05	0.000985
cellular macromolecule biosynthetic process	1384	276	182.17	1.52	+	3.8e-10	4.16e-08
macromolecule biosynthetic process	1412	283	185.85	1.52	+	1.22e-10	1.43e-08
mitotic cell cycle process	506	136	66.6	2.04	+	2.26e-12	3.66e-10
mitotic cell cycle	595	154	78.32	1.97	+	9.15e-13	1.56e-10
cellular pigment accumulation	12	8	1.58	5.06	+	0.00115	0.0271
pigment accumulation	12	8	1.58	5.06	+	0.00115	0.0271
positive regulation of triglyceride biosynthetic process	13	8	1.71	4.68	+	0.00166	0.0366
regulation of triglyceride biosynthetic process	19	11	2.5	4.4	+	0.000341	0.0102
regulation of triglyceride metabolic process	39	18	5.13	3.51	+	5.02e-05	0.00204
regulation of lipid metabolic process	338	93	44.49	2.09	+	3.11e-09	3.04e-07
positive regulation of triglyceride metabolic process	22	12	2.9	4.14	+	0.000279	0.00873
positive regulation of lipid metabolic process	154	38	20.27	1.87	+	0.000947	0.0231
regulation of lipoprotein lipase activity	18	11	2.37	4.64	+	0.000241	0.00772
peptidyl-serine dephosphorylation	15	9	1.97	4.56	+	0.000978	0.0238
phosphate-containing compound metabolic process	1802	382	237.19	1.61	+	1.95e-17	5.89e-15
phosphorus metabolic process	1822	385	239.82	1.61	+	2.09e-17	6.17e-15
cellular response to arsenic-containing substance	21	12	2.76	4.34	+	0.000202	0.00664
response to arsenic-containing substance	33	15	4.34	3.45	+	0.000238	0.00766
insulin-like growth factor receptor signaling pathway	14	8	1.84	4.34	+	0.00235	0.0478
deoxyribonucleoside monophosphate catabolic process	14	8	1.84	4.34	+	0.00235	0.0478
nucleobase-containing compound catabolic process	277	61	36.46	1.67	+	0.000437	0.0126
cellular nitrogen compound catabolic process	321	77	42.25	1.82	+	6.05e-06	0.00032
cellular nitrogen compound metabolic process	3203	650	421.59	1.54	+	2.47e-26	2.77e-23
cellular catabolic process	1626	363	214.02	1.7	+	1.32e-19	5.31e-17
catabolic process	1898	411	249.82	1.65	+	3.93e-20	1.87e-17
heterocycle catabolic process	315	77	41.46	1.86	+	3.41e-06	0.000191
heterocycle metabolic process	2649	541	348.67	1.55	+	5.05e-22	2.93e-19
aromatic compound catabolic process	338	79	44.49	1.78	+	1.34e-05	0.000645
cellular aromatic compound metabolic process	2703	544	355.78	1.53	+	7.36e-21	3.6e-18
nucleobase-containing compound metabolic process	2483	498	326.82	1.52	+	8.93e-19	3.42e-16
organic cyclic compound metabolic process	2944	602	387.5	1.55	+	7.4e-25	6.82e-22
organic cyclic compound catabolic process	366	86	48.17	1.79	+	3.71e-06	0.000206
organic substance catabolic process	1613	353	212.31	1.66	+	6.71e-18	2.19e-15
nucleoside phosphate metabolic process	420	100	55.28	1.81	+	3.57e-07	2.48e-05
nucleobase-containing small molecule metabolic process	488	115	64.23	1.79	+	7.32e-08	5.88e-06
organophosphate metabolic process	839	191	110.43	1.73	+	3.82e-11	4.99e-09
deoxyribonucleoside monophosphate metabolic process	24	12	3.16	3.8	+	0.00051	0.0142
low-density lipoprotein particle clearance	14	8	1.84	4.34	+	0.00235	0.0477
plasma lipoprotein particle clearance	24	11	3.16	3.48	+	0.0015	0.0336
cellular copper ion homeostasis	16	9	2.11	4.27	+	0.00137	0.0314
peptidyl-threonine dephosphorylation	16	9	2.11	4.27	+	0.00137	0.0313
regulation of GTP binding	16	9	2.11	4.27	+	0.00137	0.0313
regulation of binding	370	92	48.7	1.89	+	2.18e-07	1.59e-05
glutamine family amino acid catabolic process	25	14	3.29	4.25	+	7.11e-05	0.00274
alpha-amino acid catabolic process	91	33	11.98	2.76	+	3.68e-06	0.000205
organic acid catabolic process	223	61	29.35	2.08	+	2.28e-06	0.000132
small molecule catabolic process	360	97	47.38	2.05	+	3.59e-09	3.49e-07
alpha-amino acid metabolic process	196	56	25.8	2.17	+	1.51e-06	8.99e-05
cellular amino acid metabolic process	279	79	36.72	2.15	+	1.59e-08	1.4e-06
organonitrogen compound catabolic process	1053	229	138.6	1.65	+	1.84e-11	2.57e-09
glutamine family amino acid metabolic process	73	24	9.61	2.5	+	0.000325	0.00992
2-oxoglutarate metabolic process	17	9	2.24	4.02	+	0.00188	0.0404
DNA unwinding involved in DNA replication	22	11	2.9	3.8	+	0.000868	0.0217
glycerol metabolic process	20	10	2.63	3.8	+	0.00148	0.0333
polyol metabolic process	107	29	14.08	2.06	+	0.00111	0.0264
alcohol metabolic process	326	95	42.91	2.21	+	1.56e-10	1.8e-08
organic hydroxy compound metabolic process	483	125	63.57	1.97	+	1.42e-10	1.66e-08
cellular carbohydrate metabolic process	166	53	21.85	2.43	+	1.91e-07	1.41e-05
carbohydrate metabolic process	470	111	61.86	1.79	+	1.24e-07	9.72e-06
glucose 6-phosphate metabolic process	22	11	2.9	3.8	+	0.000868	0.0217
carbohydrate derivative metabolic process	927	195	122.02	1.6	+	6.41e-09	5.98e-07
negative regulation of fibroblast proliferation	30	15	3.95	3.8	+	0.000105	0.00387
negative regulation of cell population proliferation	709	153	93.32	1.64	+	7.16e-08	5.78e-06
regulation of fibroblast proliferation	80	30	10.53	2.85	+	6.75e-06	0.000353
negative regulation of fatty acid metabolic process	36	18	4.74	3.8	+	2.21e-05	0.001
regulation of fatty acid metabolic process	91	31	11.98	2.59	+	2.32e-05	0.00104
negative regulation of lipid metabolic process	103	28	13.56	2.07	+	0.00141	0.032
glutamate metabolic process	31	15	4.08	3.68	+	0.00014	0.00492
regulation of hydrogen peroxide-induced cell death	23	11	3.03	3.63	+	0.00115	0.0271
regulation of cellular response to stress	670	146	88.19	1.66	+	1.08e-07	8.48e-06
regulation of response to stress	1316	278	173.22	1.6	+	1.43e-12	2.39e-10
regulation of cell death	1597	328	210.2	1.56	+	2.06e-13	4e-11
regulation of response to reactive oxygen species	31	13	4.08	3.19	+	0.0011	0.0263
Golgi to plasma membrane protein transport	30	14	3.95	3.55	+	0.000309	0.00949
establishment of protein localization to plasma membrane	48	17	6.32	2.69	+	0.00128	0.0296
protein localization to membrane	437	86	57.52	1.5	+	0.000895	0.0221
cellular protein localization	1335	276	175.72	1.57	+	1.39e-11	1.97e-09
cellular macromolecule localization	1345	277	177.03	1.56	+	1.64e-11	2.31e-09
macromolecule localization	2289	461	301.29	1.53	+	1.51e-17	4.64e-15
protein localization	1867	373	245.74	1.52	+	1.22e-13	2.51e-11
establishment of protein localization to membrane	203	47	26.72	1.76	+	0.000961	0.0234
establishment of protein localization	1240	270	163.21	1.65	+	1.49e-13	2.92e-11
Golgi to plasma membrane transport	53	18	6.98	2.58	+	0.00117	0.0276
post-Golgi vesicle-mediated transport	98	29	12.9	2.25	+	0.000395	0.0116
Golgi vesicle transport	289	76	38.04	2	+	3.81e-07	2.62e-05
protein transport	1151	250	151.5	1.65	+	1.81e-12	2.96e-10
nitrogen compound transport	1550	339	204.02	1.66	+	4.34e-17	1.24e-14
organic substance transport	1913	402	251.8	1.6	+	8.9e-18	2.85e-15
protein targeting to lysosome	24	11	3.16	3.48	+	0.0015	0.0336
protein targeting to vacuole	38	14	5	2.8	+	0.00194	0.0412
protein targeting	235	53	30.93	1.71	+	0.000792	0.0203
intracellular protein transport	658	150	86.61	1.73	+	4.91e-09	4.61e-07
intracellular transport	1315	278	173.09	1.61	+	1.4e-12	2.37e-10
establishment of protein localization to organelle	310	79	40.8	1.94	+	8.6e-07	5.59e-05
protein localization to organelle	658	156	86.61	1.8	+	2.25e-10	2.54e-08
regulation of glycogen biosynthetic process	29	13	3.82	3.41	+	0.000676	0.0179
regulation of glucan biosynthetic process	29	13	3.82	3.41	+	0.000676	0.0178
regulation of polysaccharide biosynthetic process	37	15	4.87	3.08	+	0.000622	0.0168
regulation of carbohydrate biosynthetic process	98	32	12.9	2.48	+	4.38e-05	0.00184
regulation of generation of precursor metabolites and energy	132	37	17.37	2.13	+	0.000147	0.00517
regulation of glucose metabolic process	119	39	15.66	2.49	+	4.31e-06	0.000237
negative regulation of extrinsic apoptotic signaling pathway via death domain receptors	29	13	3.82	3.41	+	0.000676	0.0179
regulation of extrinsic apoptotic signaling pathway via death domain receptors	48	18	6.32	2.85	+	0.000397	0.0116
regulation of apoptotic signaling pathway	358	80	47.12	1.7	+	4.29e-05	0.00181
regulation of apoptotic process	1422	291	187.17	1.55	+	1.01e-11	1.46e-09
regulation of programmed cell death	1451	297	190.99	1.56	+	5.29e-12	8.13e-10
negative regulation of apoptotic process	876	177	115.3	1.54	+	3.62e-07	2.51e-05
negative regulation of programmed cell death	895	181	117.8	1.54	+	2.23e-07	1.61e-05
negative regulation of cell death	995	202	130.97	1.54	+	3.22e-08	2.7e-06
ERK1 and ERK2 cascade	36	16	4.74	3.38	+	0.000182	0.00615
MAPK cascade	204	48	26.85	1.79	+	0.00051	0.0142
negative regulation of endothelial cell apoptotic process	30	13	3.95	3.29	+	0.000867	0.0217
regulation of epithelial cell apoptotic process	83	26	10.92	2.38	+	0.000416	0.0121
negative regulation of epithelial cell apoptotic process	48	17	6.32	2.69	+	0.00128	0.0296
gluconeogenesis	31	13	4.08	3.19	+	0.0011	0.0264
hexose biosynthetic process	34	14	4.48	3.13	+	0.000828	0.0211
hexose metabolic process	143	35	18.82	1.86	+	0.00203	0.0423
monosaccharide metabolic process	165	40	21.72	1.84	+	0.000939	0.023
monosaccharide biosynthetic process	38	17	5	3.4	+	0.000109	0.00397
carbohydrate biosynthetic process	118	33	15.53	2.12	+	0.000303	0.0094
glucose metabolic process	100	27	13.16	2.05	+	0.00192	0.041
cellular response to epidermal growth factor stimulus	43	18	5.66	3.18	+	0.000134	0.00478
response to epidermal growth factor	47	20	6.19	3.23	+	4.85e-05	0.00198
response to organic substance	2657	523	349.72	1.5	+	2.61e-18	9.29e-16
negative regulation of protein localization to membrane	34	14	4.48	3.13	+	0.000828	0.021
negative regulation of protein localization	194	52	25.53	2.04	+	2.05e-05	0.000935
regulation of protein localization	844	191	111.09	1.72	+	5.97e-11	7.42e-09
regulation of protein localization to membrane	181	50	23.82	2.1	+	1.18e-05	0.000582
regulation of cellular localization	800	173	105.3	1.64	+	8.72e-09	7.99e-07
cholesterol biosynthetic process	37	15	4.87	3.08	+	0.000622	0.0168
sterol biosynthetic process	44	17	5.79	2.94	+	0.000433	0.0125
organic hydroxy compound biosynthetic process	171	45	22.51	2	+	0.0001	0.00373
sterol metabolic process	138	45	18.16	2.48	+	1.1e-06	6.86e-05
steroid metabolic process	260	69	34.22	2.02	+	9.48e-07	6.07e-05
lipid metabolic process	1214	270	159.79	1.69	+	1.8e-14	4.09e-12
steroid biosynthetic process	116	32	15.27	2.1	+	0.000447	0.0128
lipid biosynthetic process	580	126	76.34	1.65	+	8.77e-07	5.68e-05
organic cyclic compound biosynthetic process	951	197	125.17	1.57	+	1.28e-08	1.14e-06
cholesterol metabolic process	123	42	16.19	2.59	+	9.74e-07	6.18e-05
secondary alcohol metabolic process	133	46	17.51	2.63	+	2.1e-07	1.55e-05
secondary alcohol biosynthetic process	37	15	4.87	3.08	+	0.000622	0.0169
alcohol biosynthetic process	95	29	12.5	2.32	+	0.0002	0.0066
acyl-CoA biosynthetic process	40	16	5.26	3.04	+	0.000466	0.0132
thioester biosynthetic process	40	16	5.26	3.04	+	0.000466	0.0132
sulfur compound biosynthetic process	143	38	18.82	2.02	+	0.000265	0.00835
sulfur compound metabolic process	331	79	43.57	1.81	+	5.59e-06	0.000298
thioester metabolic process	88	29	11.58	2.5	+	6.39e-05	0.0025
purine-containing compound biosynthetic process	164	40	21.59	1.85	+	0.000894	0.0221
heterocycle biosynthetic process	813	165	107.01	1.54	+	6.96e-07	4.62e-05
cellular nitrogen compound biosynthetic process	1287	264	169.4	1.56	+	7.73e-11	9.32e-09
purine-containing compound metabolic process	338	79	44.49	1.78	+	1.34e-05	0.000643
aromatic compound biosynthetic process	823	165	108.33	1.52	+	1.33e-06	8.11e-05
organonitrogen compound biosynthetic process	1252	271	164.79	1.64	+	2.51e-13	4.8e-11
nucleotide biosynthetic process	218	52	28.69	1.81	+	0.000252	0.008
nucleotide metabolic process	411	100	54.1	1.85	+	1.86e-07	1.38e-05
nucleoside phosphate biosynthetic process	220	52	28.96	1.8	+	0.000276	0.00867
organophosphate biosynthetic process	498	112	65.55	1.71	+	9.65e-07	6.15e-05
purine nucleotide metabolic process	316	73	41.59	1.76	+	4.12e-05	0.00175
purine ribonucleotide metabolic process	303	70	39.88	1.76	+	5.76e-05	0.00231
ribonucleotide metabolic process	323	76	42.51	1.79	+	1.29e-05	0.000628
ribose phosphate metabolic process	333	78	43.83	1.78	+	1.19e-05	0.000583
ribose phosphate biosynthetic process	167	39	21.98	1.77	+	0.00207	0.043
carbohydrate derivative biosynthetic process	545	108	71.73	1.51	+	0.000151	0.00531
acyl-CoA metabolic process	88	29	11.58	2.5	+	6.39e-05	0.00251
ribonucleoside bisphosphate metabolic process	119	39	15.66	2.49	+	4.31e-06	0.000236
nucleoside bisphosphate metabolic process	119	39	15.66	2.49	+	4.31e-06	0.000235
cellular amide metabolic process	773	179	101.75	1.76	+	5.53e-11	6.93e-09
purine nucleoside bisphosphate metabolic process	119	39	15.66	2.49	+	4.31e-06	0.000238
ribonucleoside bisphosphate biosynthetic process	55	20	7.24	2.76	+	0.000361	0.0108
nucleoside bisphosphate biosynthetic process	55	20	7.24	2.76	+	0.000361	0.0107
amide biosynthetic process	494	116	65.02	1.78	+	8.48e-08	6.74e-06
purine nucleoside bisphosphate biosynthetic process	55	20	7.24	2.76	+	0.000361	0.0108
response to X-ray	30	12	3.95	3.04	+	0.00232	0.0473
platelet aggregation	43	17	5.66	3	+	0.00035	0.0105
regulation of body fluid levels	370	73	48.7	1.5	+	0.00209	0.0433
response to wounding	435	86	57.26	1.5	+	0.000866	0.0217
homotypic cell-cell adhesion	58	20	7.63	2.62	+	0.000534	0.0147
cholesterol homeostasis	87	34	11.45	2.97	+	9.45e-07	6.07e-05
sterol homeostasis	88	34	11.58	2.94	+	1.06e-06	6.64e-05
lipid homeostasis	160	47	21.06	2.23	+	5.67e-06	0.000302
heme metabolic process	41	16	5.4	2.96	+	0.000579	0.0158
porphyrin-containing compound metabolic process	48	19	6.32	3.01	+	0.000159	0.00552
tetrapyrrole metabolic process	60	19	7.9	2.41	+	0.00213	0.0438
pigment metabolic process	73	25	9.61	2.6	+	0.000182	0.00614
positive regulation of cyclin-dependent protein kinase activity	36	14	4.74	2.95	+	0.00129	0.0298
positive regulation of protein kinase activity	395	83	51.99	1.6	+	0.00017	0.00584
regulation of protein phosphorylation	1086	218	142.94	1.53	+	1.9e-08	1.65e-06
regulation of phosphorylation	1233	251	162.29	1.55	+	4.95e-10	5.31e-08
regulation of phosphate metabolic process	1378	285	181.38	1.57	+	5.28e-12	8.19e-10
regulation of phosphorus metabolic process	1380	285	181.64	1.57	+	7.05e-12	1.04e-09
regulation of protein modification process	1517	299	199.67	1.5	+	1.68e-10	1.92e-08
regulation of cellular protein metabolic process	2360	495	310.63	1.59	+	4.86e-22	2.93e-19
regulation of protein metabolic process	2526	544	332.48	1.64	+	9.7e-27	1.17e-23
positive regulation of cellular protein metabolic process	1392	289	183.22	1.58	+	2.83e-12	4.52e-10
positive regulation of protein metabolic process	1479	310	194.67	1.59	+	1.29e-13	2.6e-11
positive regulation of kinase activity	476	94	62.65	1.5	+	0.000441	0.0127
regulation of kinase activity	760	166	100.03	1.66	+	9.74e-09	8.77e-07
positive regulation of transferase activity	561	123	73.84	1.67	+	8.05e-07	5.28e-05
positive regulation of catalytic activity	1136	236	149.52	1.58	+	3.37e-10	3.74e-08
regulation of protein kinase activity	641	147	84.37	1.74	+	4.62e-09	4.39e-07
regulation of cyclin-dependent protein kinase activity	99	31	13.03	2.38	+	8.58e-05	0.00323
regulation of cell cycle	1058	236	139.26	1.69	+	9.11e-13	1.57e-10
positive regulation of substrate adhesion-dependent cell spreading	44	17	5.79	2.94	+	0.000433	0.0125
positive regulation of cell-substrate adhesion	127	35	16.72	2.09	+	0.00029	0.00903
positive regulation of cell adhesion	451	89	59.36	1.5	+	0.00066	0.0177
regulation of substrate adhesion-dependent cell spreading	60	21	7.9	2.66	+	0.000336	0.0101
tRNA aminoacylation for protein translation	42	16	5.53	2.89	+	0.000715	0.0186
tRNA aminoacylation	45	16	5.92	2.7	+	0.00182	0.0394
tRNA metabolic process	180	42	23.69	1.77	+	0.00146	0.033
ncRNA metabolic process	474	98	62.39	1.57	+	9.02e-05	0.00337
amino acid activation	46	16	6.05	2.64	+	0.00202	0.0422
translation	351	83	46.2	1.8	+	4.81e-06	0.000262
peptide biosynthetic process	378	88	49.75	1.77	+	3.74e-06	0.000207
peptide metabolic process	511	118	67.26	1.75	+	1.34e-07	1.03e-05
glycogen metabolic process	50	19	6.58	2.89	+	0.000242	0.00774
cellular glucan metabolic process	51	19	6.71	2.83	+	0.000468	0.0132
cellular polysaccharide metabolic process	74	23	9.74	2.36	+	0.000702	0.0183
polysaccharide metabolic process	78	24	10.27	2.34	+	0.000875	0.0218
glucan metabolic process	51	19	6.71	2.83	+	0.000468	0.0132
energy reserve metabolic process	63	22	8.29	2.65	+	0.000244	0.00779
energy derivation by oxidation of organic compounds	246	53	32.38	1.64	+	0.00189	0.0405
generation of precursor metabolites and energy	391	88	51.46	1.71	+	1.36e-05	0.000648
cell redox homeostasis	38	14	5	2.8	+	0.00194	0.0413
triglyceride homeostasis	38	14	5	2.8	+	0.00194	0.0412
acylglycerol homeostasis	38	14	5	2.8	+	0.00194	0.0411
regulation of cell aging	47	17	6.19	2.75	+	0.00115	0.0272
negative regulation of cold-induced thermogenesis	47	17	6.19	2.75	+	0.00115	0.0272
regulation of cold-induced thermogenesis	146	38	19.22	1.98	+	0.000448	0.0128
animal organ regeneration	67	24	8.82	2.72	+	9.59e-05	0.00357
regeneration	151	38	19.88	1.91	+	0.000825	0.0211
positive regulation of viral process	62	22	8.16	2.7	+	0.000211	0.00691
regulation of mitochondrial membrane potential	71	25	9.35	2.68	+	8.17e-05	0.00311
positive regulation of blood vessel endothelial cell migration	54	19	7.11	2.67	+	0.000646	0.0174
positive regulation of endothelial cell migration	107	34	14.08	2.41	+	2.97e-05	0.0013
regulation of endothelial cell migration	169	48	22.24	2.16	+	9.7e-06	0.000489
regulation of epithelial cell migration	228	58	30.01	1.93	+	2.39e-05	0.00106
positive regulation of epithelial cell migration	149	41	19.61	2.09	+	8.77e-05	0.00329
positive regulation of cell migration	526	108	69.23	1.56	+	4.19e-05	0.00178
positive regulation of cell motility	550	111	72.39	1.53	+	6.03e-05	0.00239
positive regulation of cellular component movement	563	112	74.1	1.51	+	0.000116	0.00422
regulation of blood vessel endothelial cell migration	91	28	11.98	2.34	+	0.000248	0.00791
regulation of vascular associated smooth muscle cell proliferation	54	19	7.11	2.67	+	0.000646	0.0173
cellular amino acid catabolic process	109	38	14.35	2.65	+	1.68e-06	9.91e-05
carboxylic acid catabolic process	219	60	28.83	2.08	+	2.02e-06	0.000118
cellular carbohydrate biosynthetic process	52	18	6.84	2.63	+	0.00103	0.0247
positive regulation of proteasomal ubiquitin-dependent protein catabolic process	93	32	12.24	2.61	+	1.49e-05	0.000699
positive regulation of ubiquitin-dependent protein catabolic process	109	34	14.35	2.37	+	3.77e-05	0.00162
regulation of ubiquitin-dependent protein catabolic process	168	47	22.11	2.13	+	2.27e-05	0.00102
regulation of proteolysis involved in cellular protein catabolic process	224	62	29.48	2.1	+	1.03e-06	6.48e-05
regulation of proteolysis	735	151	96.74	1.56	+	1.36e-06	8.25e-05
regulation of cellular protein catabolic process	259	74	34.09	2.17	+	3.52e-08	2.93e-06
regulation of protein catabolic process	401	112	52.78	2.12	+	3.08e-11	4.13e-09
regulation of catabolic process	994	254	130.83	1.94	+	9.7e-20	4.11e-17
regulation of cellular catabolic process	855	213	112.54	1.89	+	1.25e-15	3.2e-13
positive regulation of proteolysis involved in cellular protein catabolic process	135	42	17.77	2.36	+	5.24e-06	0.000282
positive regulation of proteolysis	370	93	48.7	1.91	+	1.47e-07	1.13e-05
positive regulation of cellular protein catabolic process	158	48	20.8	2.31	+	2.85e-06	0.000161
positive regulation of protein catabolic process	239	70	31.46	2.23	+	3.2e-08	2.7e-06
positive regulation of catabolic process	508	132	66.86	1.97	+	3.29e-11	4.37e-09
positive regulation of cellular catabolic process	440	113	57.91	1.95	+	1.6e-09	1.63e-07
positive regulation of proteasomal protein catabolic process	117	38	15.4	2.47	+	6.66e-06	0.000349
regulation of proteasomal protein catabolic process	190	53	25.01	2.12	+	6.86e-06	0.000357
regulation of proteasomal ubiquitin-dependent protein catabolic process	138	41	18.16	2.26	+	1.81e-05	0.000835
neutral amino acid transport	47	16	6.19	2.59	+	0.00228	0.0466
amino acid transport	119	32	15.66	2.04	+	0.000775	0.0201
organic acid transport	270	62	35.54	1.74	+	0.000186	0.00623
positive regulation of fat cell differentiation	65	22	8.56	2.57	+	0.000331	0.0101
regulation of fat cell differentiation	133	33	17.51	1.89	+	0.00212	0.0438
zymogen activation	54	18	7.11	2.53	+	0.00135	0.031
protein processing	187	44	24.61	1.79	+	0.000896	0.0221
protein maturation	255	61	33.56	1.82	+	6.23e-05	0.00245
regulation of transcription from RNA polymerase II promoter in response to stress	64	21	8.42	2.49	+	0.000915	0.0225
regulation of DNA-templated transcription in response to stress	70	22	9.21	2.39	+	0.000859	0.0216
cellular response to stress	1522	310	200.33	1.55	+	2.96e-12	4.69e-10
regulation of lipid catabolic process	61	20	8.03	2.49	+	0.00131	0.0301
establishment of protein localization to mitochondrion	71	23	9.35	2.46	+	0.000501	0.014
protein localization to mitochondrion	79	24	10.4	2.31	+	0.000928	0.0228
translational initiation	68	22	8.95	2.46	+	0.000701	0.0183
regulation of muscle cell apoptotic process	62	20	8.16	2.45	+	0.00139	0.0317
negative regulation of G2/M transition of mitotic cell cycle	75	24	9.87	2.43	+	0.000402	0.0117
regulation of G2/M transition of mitotic cell cycle	111	34	14.61	2.33	+	6.68e-05	0.0026
regulation of cell cycle G2/M phase transition	123	37	16.19	2.29	+	3.43e-05	0.00148
regulation of cell cycle phase transition	408	86	53.7	1.6	+	0.00012	0.00433
regulation of cell cycle process	681	146	89.64	1.63	+	2.39e-07	1.71e-05
regulation of mitotic cell cycle phase transition	315	70	41.46	1.69	+	0.000149	0.00524
regulation of mitotic cell cycle	469	103	61.73	1.67	+	6.22e-06	0.000329
negative regulation of cell cycle G2/M phase transition	77	25	10.14	2.47	+	0.000259	0.00818
negative regulation of cell cycle phase transition	229	51	30.14	1.69	+	0.00132	0.0303
negative regulation of cell cycle process	277	63	36.46	1.73	+	0.000165	0.00569
negative regulation of cell cycle	363	88	47.78	1.84	+	1.13e-06	6.98e-05
negative regulation of mitotic cell cycle phase transition	172	42	22.64	1.86	+	0.00079	0.0203
negative regulation of mitotic cell cycle	219	51	28.83	1.77	+	0.000525	0.0145
response to fatty acid	63	20	8.29	2.41	+	0.00151	0.0337
response to lipid	807	180	106.22	1.69	+	6.37e-10	6.8e-08
response to oxygen-containing compound	1509	324	198.62	1.63	+	2.01e-15	4.84e-13
liver development	123	39	16.19	2.41	+	1.03e-05	0.000513
gland development	405	84	53.31	1.58	+	0.000258	0.00817
hepaticobiliary system development	126	40	16.58	2.41	+	7.36e-06	0.000379
triglyceride metabolic process	70	22	9.21	2.39	+	0.000859	0.0217
acylglycerol metabolic process	98	27	12.9	2.09	+	0.00175	0.0383
neutral lipid metabolic process	99	27	13.03	2.07	+	0.00183	0.0395
cellular lipid metabolic process	923	197	121.49	1.62	+	1.92e-09	1.93e-07
glycerolipid metabolic process	364	76	47.91	1.59	+	0.000396	0.0116
regulation of cyclin-dependent protein serine/threonine kinase activity	96	30	12.64	2.37	+	0.000118	0.00427
regulation of protein serine/threonine kinase activity	368	85	48.44	1.75	+	7.74e-06	0.000395
positive regulation of protein localization to nucleus	87	27	11.45	2.36	+	0.000317	0.00967
positive regulation of protein localization	459	103	60.42	1.7	+	2.68e-06	0.000153
regulation of protein localization to nucleus	138	38	18.16	2.09	+	0.000136	0.00483
endoplasmic reticulum to Golgi vesicle-mediated transport	124	38	16.32	2.33	+	2.02e-05	0.000927
regulation of translational initiation	82	25	10.79	2.32	+	0.000664	0.0178
regulation of translation	394	106	51.86	2.04	+	7.79e-10	8.26e-08
regulation of cellular amide metabolic process	450	121	59.23	2.04	+	3.6e-11	4.74e-09
posttranscriptional regulation of gene expression	518	125	68.18	1.83	+	6.91e-09	6.41e-07
response to unfolded protein	122	37	16.06	2.3	+	3.07e-05	0.00133
response to topologically incorrect protein	143	42	18.82	2.23	+	2.38e-05	0.00106
non-canonical Wnt signaling pathway	67	20	8.82	2.27	+	0.00229	0.0467
positive regulation of DNA biosynthetic process	74	22	9.74	2.26	+	0.00194	0.0412
regulation of DNA metabolic process	404	88	53.18	1.65	+	3.48e-05	0.0015
regulation of DNA biosynthetic process	123	34	16.19	2.1	+	0.000376	0.0111
mitochondrial transmembrane transport	101	30	13.29	2.26	+	0.000284	0.00888
negative regulation of translation	165	49	21.72	2.26	+	2.79e-06	0.000159
negative regulation of cellular amide metabolic process	187	54	24.61	2.19	+	2.24e-06	0.00013
negative regulation of cellular protein metabolic process	965	213	127.02	1.68	+	2.67e-11	3.64e-09
negative regulation of protein metabolic process	1033	233	135.97	1.71	+	3.92e-13	7.23e-11
negative regulation of gene expression	874	189	115.04	1.64	+	1.85e-09	1.87e-07
cellular response to acid chemical	81	24	10.66	2.25	+	0.00108	0.026
response to acid chemical	128	32	16.85	1.9	+	0.00187	0.0402
G1/S transition of mitotic cell cycle	81	24	10.66	2.25	+	0.00108	0.026
mitotic cell cycle phase transition	164	50	21.59	2.32	+	1.47e-06	8.83e-05
cell cycle phase transition	173	53	22.77	2.33	+	5.57e-07	3.76e-05
cell cycle G1/S phase transition	83	26	10.92	2.38	+	0.000416	0.0121
regulation of protein localization to plasma membrane	105	31	13.82	2.24	+	0.000222	0.00722
regulation of protein localization to cell periphery	126	37	16.58	2.23	+	6.34e-05	0.00249
regulation of NIK/NF-kappaB signaling	99	29	13.03	2.23	+	0.000421	0.0122
viral entry into host cell	104	30	13.69	2.19	+	0.000362	0.0107
viral life cycle	180	54	23.69	2.28	+	8.9e-07	5.74e-05
viral process	258	71	33.96	2.09	+	2.2e-07	1.6e-05
entry into host	106	30	13.95	2.15	+	0.000639	0.0172
movement in host environment	134	38	17.64	2.15	+	0.000101	0.00374
biological process involved in interaction with host	148	44	19.48	2.26	+	1.18e-05	0.000581
biological process involved in symbiotic interaction	242	68	31.85	2.13	+	2.38e-07	1.7e-05
negative regulation of protein binding	94	27	12.37	2.18	+	0.00086	0.0216
negative regulation of binding	164	46	21.59	2.13	+	1.93e-05	0.000887
regulation of protein binding	198	50	26.06	1.92	+	8.99e-05	0.00336
nuclear-transcribed mRNA catabolic process	98	28	12.9	2.17	+	0.000675	0.018
mRNA catabolic process	125	31	16.45	1.88	+	0.00248	0.0499
cellular macromolecule catabolic process	833	170	109.64	1.55	+	3.31e-07	2.33e-05
macromolecule catabolic process	930	188	122.41	1.54	+	1.31e-07	1.02e-05
mRNA metabolic process	588	117	77.39	1.51	+	7.71e-05	0.00295
positive regulation of mRNA catabolic process	84	24	11.06	2.17	+	0.00217	0.0446
regulation of mRNA catabolic process	192	48	25.27	1.9	+	0.000158	0.00549
regulation of mRNA metabolic process	314	75	41.33	1.81	+	9.78e-06	0.000492
positive regulation of mRNA metabolic process	114	35	15.01	2.33	+	4.81e-05	0.00197
regulation of chromosome segregation	91	26	11.98	2.17	+	0.00119	0.0278
regulation of cytokinesis	91	26	11.98	2.17	+	0.00119	0.0277
regulation of cell division	186	43	24.48	1.76	+	0.00172	0.0377
amino acid transmembrane transport	91	26	11.98	2.17	+	0.00119	0.0277
carboxylic acid transmembrane transport	138	37	18.16	2.04	+	0.000315	0.00963
organic acid transmembrane transport	139	37	18.3	2.02	+	0.000334	0.0101
regulation of telomere maintenance	81	23	10.66	2.16	+	0.00197	0.0414
regulation of chromosome organization	214	62	28.17	2.2	+	3.45e-07	2.42e-05
regulation of organelle organization	1134	238	149.26	1.59	+	1.1e-10	1.31e-08
erythrocyte differentiation	89	25	11.71	2.13	+	0.00174	0.0382
erythrocyte homeostasis	98	28	12.9	2.17	+	0.000675	0.018
myeloid cell homeostasis	121	33	15.93	2.07	+	0.00054	0.0149
homeostasis of number of cells	241	52	31.72	1.64	+	0.00176	0.0383
myeloid cell differentiation	234	54	30.8	1.75	+	0.000397	0.0116
hemopoiesis	605	120	79.63	1.51	+	5.98e-05	0.00238
hematopoietic or lymphoid organ development	654	130	86.08	1.51	+	2.61e-05	0.00115
protein import into nucleus	107	30	14.08	2.13	+	0.00067	0.0179
protein import	155	43	20.4	2.11	+	4.77e-05	0.00196
protein localization to nucleus	177	49	23.3	2.1	+	1.46e-05	0.000687
import into nucleus	111	31	14.61	2.12	+	0.000519	0.0144
nucleocytoplasmic transport	223	58	29.35	1.98	+	1.31e-05	0.000633
nuclear transport	223	58	29.35	1.98	+	1.31e-05	0.000631
long-chain fatty acid metabolic process	111	31	14.61	2.12	+	0.000519	0.0144
fatty acid metabolic process	327	81	43.04	1.88	+	1.57e-06	9.3e-05
cellular glucose homeostasis	94	26	12.37	2.1	+	0.00148	0.0333
glucose homeostasis	195	45	25.67	1.75	+	0.00112	0.0267
carbohydrate homeostasis	196	46	25.8	1.78	+	0.000794	0.0203
cellular response to topologically incorrect protein	98	27	12.9	2.09	+	0.00175	0.0383
regulation of reactive oxygen species metabolic process	142	39	18.69	2.09	+	0.000154	0.00537
maintenance of location	164	45	21.59	2.08	+	4.63e-05	0.00191
regulation of actomyosin structure organization	99	27	13.03	2.07	+	0.00183	0.0395
regulation of actin cytoskeleton organization	349	70	45.94	1.52	+	0.002	0.042
unsaturated fatty acid metabolic process	103	28	13.56	2.07	+	0.00141	0.032
mitotic cell cycle checkpoint signaling	119	32	15.66	2.04	+	0.000775	0.02
cell cycle checkpoint signaling	149	37	19.61	1.89	+	0.00114	0.0271
cellular detoxification	108	29	14.22	2.04	+	0.0012	0.0279
response to toxic substance	233	54	30.67	1.76	+	0.000384	0.0113
response to nutrient	146	39	19.22	2.03	+	0.000198	0.00655
response to nutrient levels	442	103	58.18	1.77	+	6.48e-07	4.34e-05
response to extracellular stimulus	474	107	62.39	1.72	+	1.44e-06	8.71e-05
negative regulation of protein serine/threonine kinase activity	113	30	14.87	2.02	+	0.00143	0.0325
negative regulation of protein kinase activity	205	57	26.98	2.11	+	2.48e-06	0.000143
negative regulation of protein phosphorylation	325	77	42.78	1.8	+	9.49e-06	0.00048
negative regulation of protein modification process	502	115	66.08	1.74	+	2.89e-07	2.04e-05
negative regulation of phosphorylation	366	89	48.17	1.85	+	8.57e-07	5.6e-05
negative regulation of phosphate metabolic process	422	102	55.55	1.84	+	1.81e-07	1.36e-05
negative regulation of phosphorus metabolic process	423	102	55.68	1.83	+	1.86e-07	1.38e-05
negative regulation of kinase activity	228	62	30.01	2.07	+	1.88e-06	0.00011
mitochondrial transport	162	43	21.32	2.02	+	0.000108	0.00397
cellular response to insulin stimulus	147	39	19.35	2.02	+	0.000306	0.00944
response to peptide hormone	346	76	45.54	1.67	+	0.000115	0.00417
response to peptide	427	93	56.2	1.65	+	2.21e-05	0.000999
response to organonitrogen compound	942	198	123.99	1.6	+	4.75e-09	4.48e-07
response to nitrogen compound	1031	216	135.7	1.59	+	1e-09	1.04e-07
response to hormone	745	157	98.06	1.6	+	1.82e-07	1.37e-05
cellular response to peptide hormone stimulus	230	54	30.27	1.78	+	0.000254	0.00807
cellular response to hormone stimulus	473	101	62.26	1.62	+	2.2e-05	0.001
cellular response to peptide	292	68	38.43	1.77	+	6.05e-05	0.00239
cellular response to oxygen-containing compound	1031	213	135.7	1.57	+	3.88e-09	3.75e-07
cellular response to organonitrogen compound	565	118	74.37	1.59	+	9.08e-06	0.00046
cellular response to nitrogen compound	626	129	82.4	1.57	+	6.24e-06	0.000328
response to endoplasmic reticulum stress	219	58	28.83	2.01	+	7.47e-06	0.000383
positive regulation of small molecule metabolic process	140	37	18.43	2.01	+	0.000356	0.0107
regulation of osteoblast differentiation	125	33	16.45	2.01	+	0.000705	0.0184
cell division	498	130	65.55	1.98	+	4.68e-11	6.02e-09
mitochondrial membrane organization	115	30	15.14	1.98	+	0.0016	0.0354
mitochondrion organization	425	90	55.94	1.61	+	7.03e-05	0.00272
isoprenoid metabolic process	119	31	15.66	1.98	+	0.00127	0.0295
fatty acid biosynthetic process	120	31	15.79	1.96	+	0.00195	0.0413
monocarboxylic acid biosynthetic process	164	41	21.59	1.9	+	0.000599	0.0164
positive regulation of hormone secretion	125	32	16.45	1.94	+	0.00156	0.0348
activation of protein kinase activity	133	34	17.51	1.94	+	0.000983	0.0238
nuclear export	122	31	16.06	1.93	+	0.0021	0.0435
negative regulation of cellular catabolic process	260	66	34.22	1.93	+	7.16e-06	0.00037
negative regulation of catabolic process	319	76	41.99	1.81	+	1.11e-05	0.000554
intracellular receptor signaling pathway	142	36	18.69	1.93	+	0.00089	0.0221
macroautophagy	166	42	21.85	1.92	+	0.000307	0.00944
autophagy	280	62	36.85	1.68	+	0.000451	0.0129
process utilizing autophagic mechanism	280	62	36.85	1.68	+	0.000451	0.0129
regulation of DNA replication	131	33	17.24	1.91	+	0.00198	0.0415
mRNA transport	135	34	17.77	1.91	+	0.00152	0.034
RNA transport	165	41	21.72	1.89	+	0.000619	0.0169
establishment of RNA localization	167	41	21.98	1.87	+	0.000676	0.0179
RNA localization	188	46	24.75	1.86	+	0.000309	0.00949
nucleic acid transport	165	41	21.72	1.89	+	0.000619	0.0169
nucleobase-containing compound transport	221	52	29.09	1.79	+	0.000391	0.0115
response to reactive oxygen species	168	42	22.11	1.9	+	0.000465	0.0132
response to oxidative stress	367	85	48.31	1.76	+	7.46e-06	0.000383
regulation of dephosphorylation	132	33	17.37	1.9	+	0.00204	0.0425
cellular response to hypoxia	136	34	17.9	1.9	+	0.00159	0.0353
response to hypoxia	283	61	37.25	1.64	+	0.000883	0.022
response to decreased oxygen levels	296	63	38.96	1.62	+	0.000852	0.0215
response to oxygen levels	319	67	41.99	1.6	+	0.000743	0.0193
cellular response to decreased oxygen levels	144	36	18.95	1.9	+	0.001	0.0242
cellular response to oxygen levels	160	38	21.06	1.8	+	0.00171	0.0376
protein stabilization	196	49	25.8	1.9	+	0.000127	0.00453
regulation of protein stability	308	71	40.54	1.75	+	4.74e-05	0.00195
response to estradiol	125	31	16.45	1.88	+	0.00248	0.0499
response to organic cyclic compound	841	176	110.7	1.59	+	4.4e-08	3.63e-06
cellular response to oxidative stress	219	54	28.83	1.87	+	8.56e-05	0.00323
cellular response to chemical stress	261	62	34.35	1.8	+	7.25e-05	0.00279
circadian rhythm	134	33	17.64	1.87	+	0.00222	0.0455
aging	268	66	35.28	1.87	+	1.45e-05	0.000684
mitotic nuclear division	168	41	22.11	1.85	+	0.000713	0.0186
regulation of RNA splicing	156	38	20.53	1.85	+	0.00146	0.0329
signal transduction in response to DNA damage	136	33	17.9	1.84	+	0.00247	0.0499
response to ketone	190	46	25.01	1.84	+	0.000457	0.013
rRNA processing	219	53	28.83	1.84	+	0.000178	0.00609
ncRNA processing	388	82	51.07	1.61	+	0.000193	0.00644
RNA processing	851	168	112.01	1.5	+	2.44e-06	0.000141
rRNA metabolic process	230	55	30.27	1.82	+	0.000174	0.00597
ribosome biogenesis	295	65	38.83	1.67	+	0.000335	0.0101
ribonucleoprotein complex biogenesis	421	87	55.41	1.57	+	0.000198	0.00656
positive regulation of endopeptidase activity	174	42	22.9	1.83	+	0.000843	0.0213
positive regulation of peptidase activity	191	46	25.14	1.83	+	0.000475	0.0134
cellular lipid catabolic process	188	45	24.75	1.82	+	0.000625	0.0169
lipid catabolic process	289	65	38.04	1.71	+	0.000213	0.00696
organic hydroxy compound transport	159	38	20.93	1.82	+	0.00163	0.036
non-membrane-bounded organelle assembly	310	74	40.8	1.81	+	1.23e-05	0.000597
positive regulation of cellular amide metabolic process	168	40	22.11	1.81	+	0.00146	0.033
cellular response to starvation	161	38	21.19	1.79	+	0.00247	0.0499
cellular response to nutrient levels	206	51	27.11	1.88	+	0.00012	0.00431
cellular response to extracellular stimulus	237	57	31.19	1.83	+	0.000104	0.00385
cellular response to external stimulus	304	68	40.01	1.7	+	0.000159	0.00552
response to starvation	198	49	26.06	1.88	+	0.00019	0.00634
Ras protein signal transduction	188	44	24.75	1.78	+	0.000943	0.0231
small GTPase mediated signal transduction	263	60	34.62	1.73	+	0.000223	0.00724
positive regulation of I-kappaB kinase/NF-kappaB signaling	189	44	24.88	1.77	+	0.00131	0.0303
regulation of I-kappaB kinase/NF-kappaB signaling	251	61	33.04	1.85	+	5.32e-05	0.00215
cellular modified amino acid metabolic process	185	43	24.35	1.77	+	0.00123	0.0286
negative regulation of MAPK cascade	168	39	22.11	1.76	+	0.00217	0.0446
negative regulation of intracellular signal transduction	508	115	66.86	1.72	+	4.67e-07	3.19e-05
protein autophosphorylation	187	43	24.61	1.75	+	0.00176	0.0384
phosphorylation	912	184	120.04	1.53	+	2.16e-07	1.58e-05
regulation of cysteine-type endopeptidase activity	232	53	30.54	1.74	+	0.000533	0.0147
peptidyl-serine phosphorylation	184	42	24.22	1.73	+	0.00229	0.0468
positive regulation of protein transport	304	69	40.01	1.72	+	8.55e-05	0.00324
regulation of protein transport	501	109	65.94	1.65	+	4.84e-06	0.000263
regulation of establishment of protein localization	526	114	69.23	1.65	+	3.27e-06	0.000183
positive regulation of establishment of protein localization	320	72	42.12	1.71	+	8.8e-05	0.0033
cellular response to tumor necrosis factor	190	43	25.01	1.72	+	0.00197	0.0414
response to tumor necrosis factor	214	49	28.17	1.74	+	0.000913	0.0225
regulation of neuron apoptotic process	208	47	27.38	1.72	+	0.00153	0.0341
regulation of neuron death	313	66	41.2	1.6	+	0.000866	0.0217
response to steroid hormone	272	61	35.8	1.7	+	0.000376	0.0111
cellular component disassembly	291	65	38.3	1.7	+	0.000224	0.00727
response to metal ion	354	79	46.59	1.7	+	5.37e-05	0.00216
response to inorganic substance	514	115	67.65	1.7	+	7.45e-07	4.93e-05
protein polyubiquitination	244	54	32.12	1.68	+	0.000979	0.0238
response to alcohol	235	52	30.93	1.68	+	0.00111	0.0265
in utero embryonic development	387	85	50.94	1.67	+	4.34e-05	0.00183
proteasome-mediated ubiquitin-dependent protein catabolic process	320	70	42.12	1.66	+	0.000227	0.00733
modification-dependent macromolecule catabolic process	566	112	74.5	1.5	+	0.000121	0.00435
protein catabolic process	700	139	92.14	1.51	+	1.4e-05	0.000666
proteasomal protein catabolic process	348	75	45.81	1.64	+	0.000218	0.00712
regulation of intracellular protein transport	234	51	30.8	1.66	+	0.00201	0.042
cellular response to lipid	488	105	64.23	1.63	+	1.23e-05	0.000599
regulation of inflammatory response	356	76	46.86	1.62	+	0.000254	0.00806
chromosome segregation	284	60	37.38	1.61	+	0.00124	0.0288
regulation of autophagy	337	71	44.36	1.6	+	0.000566	0.0155
lymphocyte activation	410	85	53.97	1.58	+	0.000217	0.00708
mononuclear cell differentiation	296	61	38.96	1.57	+	0.002	0.0419
leukocyte differentiation	360	74	47.38	1.56	+	0.000831	0.0211
response to lipopolysaccharide	308	63	40.54	1.55	+	0.00188	0.0405
regulation of small GTPase mediated signal transduction	308	63	40.54	1.55	+	0.00188	0.0405
cellular response to organic cyclic compound	504	103	66.34	1.55	+	8.45e-05	0.00321
angiogenesis	323	66	42.51	1.55	+	0.00177	0.0386
regulation of cell growth	422	86	55.55	1.55	+	0.00034	0.0103
regulation of Wnt signaling pathway	346	70	45.54	1.54	+	0.00149	0.0334
positive regulation of apoptotic process	504	101	66.34	1.52	+	0.000183	0.00615
positive regulation of programmed cell death	516	103	67.92	1.52	+	0.000169	0.00584
positive regulation of cell death	577	123	75.95	1.62	+	2.68e-06	0.000153
apoptotic process	902	180	118.72	1.52	+	5.23e-07	3.57e-05
histone modification	389	77	51.2	1.5	+	0.00162	0.0359
