# Supplementary material for: Expression Analysis in Atlantic Salmon Liver Reveals miRNAs Associated with Smoltification and Seawater Adaptation
Source: Biology (Basel). 2022 Apr 30;11(5):688. doi: 10.3390/biology11050688 (PMC9138835; doi:10.3390/biology11050688)
Supplement: Supplementary file 1 [file biology-11-00688-s001.zip › Table S9. Enriched pathways.xlsx]

## Sheet: Sheet1
Table S9. Enriched Reactome gene pathways associated with predicted targets with fold enrichment over 2. The enriched gene pathways were sorteds heirarchically by default.
Pathway enrichment analysis (Reactome pathways)1	Pathway categories2	Total number of genes in the reference gene pathways3	Number of predicted targets in the reference gene pathways4	Expected value5	Fold Enrichment6	Over/under representation category7	Raw P-value8	Benjamini-Hochberg (FDR)9
NR1H2 & NR1H3 regulate gene expression linked to lipogenesis	Signal Transduction	8	6	1.05	5.7	+	0.00322	0.0462
NR1H2 and NR1H3-mediated signaling	Signal Transduction	45	15	5.92	2.53	+	0.00361	0.05
Signaling by Nuclear Receptors	Signal Transduction	261	60	34.35	1.75	+	0.000207	0.00726
Response of EIF2AK1 (HRI) to heme deficiency	Cellular responses to stimuli (stress)	15	11	1.97	5.57	+	7.5e-05	0.00334
Cellular responses to stress	Cellular responses to stimuli (stress)	718	175	94.51	1.85	+	2.02e-12	1.01e-09
Unwinding of DNA	DNA replication	12	8	1.58	5.06	+	0.00115	0.023
DNA strand elongation	DNA replication	32	13	4.21	3.09	+	0.00139	0.0264
Synthesis of DNA	DNA replication	119	35	15.66	2.23	+	0.000114	0.00465
S Phase	DNA replication	161	49	21.19	2.31	+	2.04e-06	0.000164
Cell Cycle, Mitotic	DNA replication	517	131	68.05	1.93	+	2.19e-10	4.56e-08
HSF1 activation	Cellular responses to stimuli (stress)	12	8	1.58	5.06	+	0.00115	0.0228
Cellular response to heat stress	Cellular responses to stimuli (stress)	88	26	11.58	2.24	+	0.000632	0.0164
The NLRP3 inflammasome	Immune system (innate)	16	10	2.11	4.75	+	0.000405	0.0115
Inflammasomes	Immune system (innate)	21	11	2.76	3.98	+	0.000646	0.0164
Cytosolic tRNA aminoacylation	Metabolism of protein	24	15	3.16	4.75	+	1.51e-05	0.000943
tRNA Aminoacylation	Metabolism of protein	42	17	5.53	3.08	+	0.000281	0.00897
Translation	Metabolism of protein	293	69	38.57	1.79	+	3.19e-05	0.00159
TP53 regulates transcription of additional cell cycle genes whose exact role in the p53 pathway remain uncertain	Gene expression (Trancription)	21	12	2.76	4.34	+	0.000202	0.00718
TP53 Regulates Transcription of Cell Cycle Genes	Gene expression (Trancription)	49	24	6.45	3.72	+	1.33e-06	0.00011
Transcriptional Regulation by TP53	Gene expression (Trancription)	360	84	47.38	1.77	+	6.25e-06	0.000445
Initiation of Nuclear Envelope (NE) Reformation	Cell cycle	16	9	2.11	4.27	+	0.00137	0.0265
Nuclear Envelope (NE) Reassembly	Cell cycle	70	22	9.21	2.39	+	0.000859	0.0191
Mitotic Anaphase	Cell cycle	227	58	29.88	1.94	+	2.29e-05	0.0013
Mitotic Metaphase and Anaphase	Cell cycle	228	58	30.01	1.93	+	2.39e-05	0.0013
M Phase	Cell cycle	375	84	49.36	1.7	+	2.45e-05	0.0013
Nuclear events stimulated by ALK signaling in cancer	Disease	18	10	2.37	4.22	+	0.000804	0.0187
Signaling by ALK fusions and activated point mutants	Disease	53	22	6.98	3.15	+	2.8e-05	0.00146
Signaling by ALK in cancer	Disease	53	22	6.98	3.15	+	2.8e-05	0.00143
Diseases of signal transduction by growth factor receptors and second messengers	Disease	418	99	55.02	1.8	+	4.86e-07	4.33e-05
Cholesterol biosynthesis	Metabolism of lipids (steroids)	24	12	3.16	3.8	+	0.00051	0.0138
Metabolism of steroids	Metabolism of lipids (steroids)	150	43	19.74	2.18	+	2.31e-05	0.00128
Metabolism of lipids	Metabolism of lipids (steroids)	736	176	96.88	1.82	+	7.14e-12	2.22e-09
Deadenylation of mRNA	Metabolism of RNA	25	12	3.29	3.65	+	0.000676	0.0165
Deadenylation-dependent mRNA decay	Metabolism of RNA	56	19	7.37	2.58	+	0.00085	0.0193
Metabolism of porphyrins	Metabolism of porphyrins	25	12	3.29	3.65	+	0.000676	0.0164
Amino acid transport across the plasma membrane	Transport of small molecules	32	15	4.21	3.56	+	0.000183	0.00681
Plasma lipoprotein remodeling	Transport of small molecules	32	15	4.21	3.56	+	0.000183	0.00671
Plasma lipoprotein assembly, remodeling, and clearance	Transport of small molecules	67	26	8.82	2.95	+	1.42e-05	0.000905
Glucuronidation	Biological oxidations	25	11	3.29	3.34	+	0.00194	0.0338
Phase II - Conjugation of compounds	Biological oxidations	109	28	14.35	1.95	+	0.0029	0.0441
Biological oxidations	Biological oxidations	220	50	28.96	1.73	+	0.000788	0.0185
Cyclin A/B1/B2 associated events during G2/M transition	Cell cycle	25	11	3.29	3.34	+	0.00194	0.0336
G2/M Transition	Cell cycle	195	47	25.67	1.83	+	0.000379	0.0111
Mitotic G2-G2/M phases	Cell cycle	197	47	25.93	1.81	+	0.000568	0.0152
Nucleotide salvage	Metabolism of nucleotides	23	10	3.03	3.3	+	0.00329	0.0467
Growth hormone receptor signaling	Immune system (Cytokine signaling)	23	10	3.03	3.3	+	0.00329	0.0464
Cytokine Signaling in Immune system	Immune system (Cytokine signaling)	697	139	91.74	1.52	+	1.32e-05	0.000863
RHO GTPases Activate WASPs and WAVEs	Signal Transduction	35	15	4.61	3.26	+	0.000391	0.0112
RHO GTPase Effectors	Signal Transduction	288	76	37.91	2	+	3.58e-07	3.44e-05
Signaling by Rho GTPases	Signal Transduction	670	150	88.19	1.7	+	1.27e-08	2.11e-06
Signaling by Rho GTPases, Miro GTPases and RHOBTB3	Signal Transduction	685	152	90.16	1.69	+	1.75e-08	2.56e-06
Activation of gene expression by SREBF (SREBP)	Metabolism of lipids	40	17	5.26	3.23	+	0.000177	0.0068
Regulation of cholesterol biosynthesis by SREBP (SREBF)	Metabolism of lipids	53	21	6.98	3.01	+	7.23e-05	0.00334
Gluconeogenesis	Metabolism of carbohydrates	33	14	4.34	3.22	+	0.000656	0.0165
Glucose metabolism	Metabolism of carbohydrates	86	27	11.32	2.39	+	0.000295	0.00909
Metabolism of carbohydrates	Metabolism of carbohydrates	286	63	37.64	1.67	+	0.00038	0.011
Constitutive Signaling by AKT1 E17K in Cancer	Disease	26	11	3.42	3.21	+	0.00247	0.0395
Purinergic signaling in leishmaniasis infection	Disease	26	11	3.42	3.21	+	0.00247	0.0393
Cell recruitment (pro-inflammatory response)	Disease	26	11	3.42	3.21	+	0.00247	0.0398
Infectious disease	Disease	895	189	117.8	1.6	+	8.64e-09	1.54e-06
The role of Nef in HIV-1 replication and disease pathogenesis	Disease	26	11	3.42	3.21	+	0.00247	0.039
Host Interactions of HIV factors	Disease	124	38	16.32	2.33	+	2.02e-05	0.00117
HIV Infection	Disease	227	57	29.88	1.91	+	3.51e-05	0.00172
Infection with Mycobacterium tuberculosis	Disease	27	11	3.55	3.1	+	0.00312	0.0457
ATF4 activates genes in response to endoplasmic reticulum stress	Cellular responses to stimuli (stress)	27	11	3.55	3.1	+	0.00312	0.0455
PERK regulates gene expression	Cellular responses to stimuli (stress)	32	13	4.21	3.09	+	0.00139	0.0266
Unfolded Protein Response (UPR)	Cellular responses to stimuli (stress)	91	25	11.98	2.09	+	0.00202	0.0345
Activation of the pre-replicative complex	DNA replication	33	13	4.34	2.99	+	0.00173	0.031
G1/S Transition	DNA replication	130	42	17.11	2.45	+	3.27e-06	0.00024
Mitotic G1 phase and G1/S transition	DNA replication	147	48	19.35	2.48	+	4.09e-07	3.78e-05
Plasma lipoprotein clearance	Transport of small molecules	32	12	4.21	2.85	+	0.00355	0.0495
Lysosome Vesicle Biogenesis	Vesicle-mediated transport	35	13	4.61	2.82	+	0.00263	0.0407
trans-Golgi Network Vesicle Budding	Vesicle-mediated transport	72	21	9.48	2.22	+	0.00288	0.0441
Membrane Trafficking	Vesicle-mediated transport	626	140	82.4	1.7	+	4.31e-08	5.37e-06
FOXO-mediated transcription	Gene expression (Transcription)	65	24	8.56	2.81	+	7.29e-05	0.0033
EPHB-mediated forward signaling	Nervous system development	41	15	5.4	2.78	+	0.00144	0.0272
Aberrant regulation of mitotic cell cycle due to RB1 defects	Disease	36	13	4.74	2.74	+	0.0032	0.0464
FLT3 Signaling	Immune system (innate)	36	13	4.74	2.74	+	0.0032	0.0461
Signaling downstream of RAS mutants	Immune system (innate)	45	15	5.92	2.53	+	0.00361	0.0497
Signaling by RAS mutants	Immune system (innate)	45	15	5.92	2.53	+	0.00361	0.0491
Paradoxical activation of RAF signaling by kinase inactive BRAF	Disease	45	15	5.92	2.53	+	0.00361	0.0494
Signaling by moderate kinase activity BRAF mutants	Disease	45	15	5.92	2.53	+	0.00361	0.0489
Ribosomal scanning and start codon recognition	Metabolism of proteins	58	19	7.63	2.49	+	0.00114	0.0233
Translation initiation complex formation	Metabolism of proteins	58	19	7.63	2.49	+	0.00114	0.0231
Activation of the mRNA upon binding of the cap-binding complex and eIFs, and subsequent binding to 43S	Metabolism of proteins	59	19	7.77	2.45	+	0.00198	0.0341
ISG15 antiviral mechanism	Immune system (Cytokine signaling)	71	23	9.35	2.46	+	0.000501	0.0137
Antiviral mechanism by IFN-stimulated genes	Immune system (Cytokine signaling)	79	24	10.4	2.31	+	0.000928	0.0201
Interferon Signaling	Immune system (Cytokine signaling)	197	44	25.93	1.7	+	0.00231	0.0379
Potential therapeutics for SARS	Disease	85	27	11.19	2.41	+	0.000178	0.00672
SARS-CoV Infections	Disease	154	43	20.27	2.12	+	4.45e-05	0.00213
rRNA modification in the nucleus and cytosol	Metabolism of RNA	60	19	7.9	2.41	+	0.00213	0.0356
rRNA processing in the nucleus and cytosol	Metabolism of RNA	192	44	25.27	1.74	+	0.00146	0.0271
rRNA processing	Metabolism of RNA	202	47	26.59	1.77	+	0.000937	0.0201
Platelet degranulation	Hemostasis	127	40	16.72	2.39	+	7.99e-06	0.000538
Response to elevated platelet cytosolic Ca2+	Hemostasis	132	41	17.37	2.36	+	7.14e-06	0.000494
Platelet activation, signaling and aggregation	Hemostasis	260	75	34.22	2.19	+	2.26e-08	3.13e-06
Semaphorin interactions	Nervous system development	64	20	8.42	2.37	+	0.00165	0.0299
RAC2 GTPase cycle	Signal Transduction	87	27	11.45	2.36	+	0.000317	0.00963
RHO GTPase cycle	Signal Transduction	448	97	58.97	1.64	+	1.85e-05	0.00112
The role of GTSE1 in G2/M progression after G2 checkpoint	Cell cycle	78	24	10.27	2.34	+	0.000875	0.0191
SCF(Skp2)-mediated degradation of p27/p21	Cell cycle	59	18	7.77	2.32	+	0.00354	0.0495
Cyclin E associated events during G1/S transition	Cell cycle	82	25	10.79	2.32	+	0.000664	0.0166
Cyclin A:Cdk2-associated events at S phase entry	Cell cycle	84	26	11.06	2.35	+	0.000443	0.0124
Signaling by TGF-beta Receptor Complex	Signal transduction (TGF beta receptor)	74	22	9.74	2.26	+	0.00194	0.034
COPI-dependent Golgi-to-ER retrograde traffic	Vesicle-mediated transport	101	30	13.29	2.26	+	0.000284	0.00898
Golgi-to-ER retrograde transport	Vesicle-mediated transport	135	37	17.77	2.08	+	0.000183	0.00662
Intra-Golgi and retrograde Golgi-to-ER traffic	Vesicle-mediated transport	203	52	26.72	1.95	+	4.79e-05	0.00225
Regulation of mRNA stability by proteins that bind AU-rich elements	Metabolism of RNA	85	25	11.19	2.23	+	0.000864	0.0191
APC/C:Cdc20 mediated degradation of mitotic proteins	Cell cycle	75	22	9.87	2.23	+	0.00207	0.0349
Activation of APC/C and APC/C:Cdc20 mediated degradation of mitotic proteins	Cell cycle	76	22	10	2.2	+	0.00224	0.0373
APC/C-mediated degradation of cell cycle proteins	Cell cycle	87	26	11.45	2.27	+	0.000571	0.015
Regulation of mitotic cell cycle	Cell cycle	87	26	11.45	2.27	+	0.000571	0.0151
Signaling by MET	Signal transduction by Receptor Tyrosine	76	22	10	2.2	+	0.00224	0.037
Signaling by Receptor Tyrosine Kinases	Signal transduction by Receptor Tyrosine	505	116	66.47	1.75	+	2.24e-07	2.23e-05
APC/C:Cdh1 mediated degradation of Cdc20 and other APC/C:Cdh1 targeted proteins in late mitosis/early G1	Cell cycle	73	21	9.61	2.19	+	0.0031	0.0457
MHC class II antigen presentation	Immune system (adaptive)	126	36	16.58	2.17	+	0.000111	0.00462
Adaptive Immune System	Immune system (adaptive)	826	176	108.72	1.62	+	1.46e-08	2.27e-06
Antigen processing-Cross presentation	Immune system (adaptive)	106	30	13.95	2.15	+	0.000639	0.0164
Class I MHC mediated antigen processing & presentation	Immune system (adaptive)	378	89	49.75	1.79	+	2.53e-06	0.000191
RAC3 GTPase cycle	Signal transduction by Pho GTPases	93	26	12.24	2.12	+	0.00137	0.0266
Switching of origins to a post-replicative state	DNA replication	90	25	11.85	2.11	+	0.00187	0.0333
Fatty acid metabolism	Metabolism of lipids	174	48	22.9	2.1	+	1.97e-05	0.00117
PPARA activates gene expression	Metabolism of lipids	114	30	15.01	2	+	0.00151	0.0276
Regulation of lipid metabolism by PPARalpha	Metabolism of lipids	115	31	15.14	2.05	+	0.00101	0.0213
PTEN Regulation	Signal transduction by second messenger	137	36	18.03	2	+	0.000479	0.0133
PIP3 activates AKT signaling	Signal transduction by second messenger	251	58	33.04	1.76	+	0.000225	0.00758
Intracellular signaling by second messengers	Signal transduction by second messenger	291	60	38.3	1.57	+	0.0024	0.0391
Post-translational protein phosphorylation	Metabolism of proteins	107	28	14.08	1.99	+	0.00265	0.0408
Resolution of Sister Chromatid Cohesion	Cell cycle	123	32	16.19	1.98	+	0.00144	0.027
G2/M Checkpoints	Cell cycle	150	39	19.74	1.98	+	0.00035	0.0104
Cell Cycle Checkpoints	Cell cycle	271	71	35.67	1.99	+	9.92e-07	8.53e-05
Regulation of Insulin-like Growth Factor (IGF) transport and uptake by Insulin-like Growth Factor Binding Proteins (IGFBPs)	Metabolism of proteins	124	32	16.32	1.96	+	0.0015	0.0276
RHO GTPases Activate Formins	Signal transduction by Pho GTPases	136	35	17.9	1.96	+	0.000737	0.0175
Mitotic Spindle Checkpoint	Cell cycle	109	28	14.35	1.95	+	0.0029	0.0438
Interleukin-4 and Interleukin-13 signaling	Immune system (cytokine signaling)	111	28	14.61	1.92	+	0.00326	0.0465
Signaling by Interleukins	Immune system (cytokine signaling)	448	94	58.97	1.59	+	7.72e-05	0.00338
Metabolism of amino acids and derivatives	Metabolism of amino acids and derivatives	369	93	48.57	1.91	+	9.98e-08	1.18e-05
RAC1 GTPase cycle	Signal transduction by Pho GTPases	183	46	24.09	1.91	+	0.000244	0.00801
Cytoprotection by HMOX1	Cellular responses to stress	120	30	15.79	1.9	+	0.00295	0.0444
Cellular response to chemical stress	Cellular responses to stress	154	41	20.27	2.02	+	0.000173	0.00676
Metabolism of vitamins and cofactors	Metabolism of vitamins and cofactors	186	46	24.48	1.88	+	0.000276	0.00894
Separation of Sister Chromatids	Cell cycle	187	46	24.61	1.87	+	0.000292	0.00909
Neutrophil degranulation	Immune system (innate)	477	117	62.78	1.86	+	8.51e-09	1.63e-06
Apoptosis	Programmed cell dealth	173	42	22.77	1.84	+	0.000813	0.0188
Regulation of TP53 Activity	Gene expression (Transcription)	159	38	20.93	1.82	+	0.00163	0.0297
mRNA Splicing - Major Pathway	Metabolism of RNA	180	43	23.69	1.81	+	0.00102	0.0213
mRNA Splicing	Metabolism of RNA	188	44	24.75	1.78	+	0.000943	0.0201
Processing of Capped Intron-Containing Pre-mRNA	Metabolism of RNA	238	56	31.33	1.79	+	0.00022	0.0075
ER to Golgi Anterograde Transport	Vesicle-mediated transport	155	37	20.4	1.81	+	0.00206	0.0349
Transport to the Golgi and subsequent modification	Vesicle-mediated transport	186	42	24.48	1.72	+	0.00245	0.0396
Asparagine N-linked glycosylation	Vesicle-mediated transport	305	68	40.15	1.69	+	0.000164	0.0065
Cellular Senescence	Cellular responses to stress	164	39	21.59	1.81	+	0.00187	0.0331
Antigen processing: Ubiquitination & Proteasome degradation	Cellular responses to stress	308	67	40.54	1.65	+	0.00033	0.00991
RAF/MAP kinase cascade	Signal transduction	264	57	34.75	1.64	+	0.00111	0.0229
MAPK1/MAPK3 signaling	Signal transduction	269	59	35.41	1.67	+	0.000665	0.0164
MAPK family signaling cascades	Signal transduction	308	69	40.54	1.7	+	0.000128	0.00515
Chromatin modifying enzymes	Chromatin organization	240	51	31.59	1.61	+	0.00305	0.0455
